# Supplementary material for: Proteomic quantification of native and ECM-enriched mouse ovaries reveals an age-dependent fibro-inflammatory signature
Source: publisher site journal article supplement (doi:10.18632/aging.205190), 2023-10-27
Supplement: Supplementary file [file aging-v15i20-205190-supplementary-material-SD6.pdf]

**SUPPLEMENTARY TABLES**

**Supplementary Table 5. All matrisome proteins identified in native and ECM-enriched mouse ovaries.**

| Experimental group      | Division             | Category                                                                                              | Protein names                                                                                                                                                                                                                                                                                                                                                                                                                                                                                                                                                                                                                                                                                                                                                                                                                                                                                                                                                                                                                                                                                                                                                                                                                                                                               |
|-------------------------|----------------------|-------------------------------------------------------------------------------------------------------|---------------------------------------------------------------------------------------------------------------------------------------------------------------------------------------------------------------------------------------------------------------------------------------------------------------------------------------------------------------------------------------------------------------------------------------------------------------------------------------------------------------------------------------------------------------------------------------------------------------------------------------------------------------------------------------------------------------------------------------------------------------------------------------------------------------------------------------------------------------------------------------------------------------------------------------------------------------------------------------------------------------------------------------------------------------------------------------------------------------------------------------------------------------------------------------------------------------------------------------------------------------------------------------------|
| Native                  | Core Matrisome       | ECM Glycoproteins                                                                                     | Fibulin-5, Elastin, Microfibril-associated glycoprotein 4, SPARC-related modular calcium-binding protein 1, SPARC-like protein 1, Adiponectin, Von Willebrand factor A domain-containing protein 9, Cysteine-rich with EGF-like domain protein 2, Multimerin-2, Cysteine-rich with EGF-like domain protein 1                                                                                                                                                                                                                                                                                                                                                                                                                                                                                                                                                                                                                                                                                                                                                                                                                                                                                                                                                                                |
|                         |                      | ECM Regulators                                                                                        | Pregnancy zone protein, Cathepsin C, Murinoglobulin-2, Prothrombin, Kininogen-1, Inter-alpha-trypsin inhibitor heavy chain 1, Heparin cofactor 2, Cystatin-B, Cathepsin S, Prolyl 4-hydroxylase subunit alpha 1, Cystatin-C, Kininogen-2, Glia-derived nexin, Inter-alpha-trypsin inhibitor heavy chain 3, Alpha-1-antitrypsin 1-2, Carboxypeptidase N subunit 2, Pro-cathepsin H, Carboxypeptidase, Lysl oxidase homolog 2, Plasma protease C1 inhibitor, Corticosteroid-binding globulin, Angiotensinogen, Glycosaminoglycan xylosylkinase, Disintegrin and metalloproteinase domain-containing protein 17                                                                                                                                                                                                                                                                                                                                                                                                                                                                                                                                                                                                                                                                                |
|                         | Matrisome-associated | ECM-affiliated Proteins                                                                               | Galectin, Chondroitin sulfate proteoglycan 4, Hemopexin, Plexin domain-containing protein 2, Galectin-related protein, Syndecan-1, Semaphorin-7a                                                                                                                                                                                                                                                                                                                                                                                                                                                                                                                                                                                                                                                                                                                                                                                                                                                                                                                                                                                                                                                                                                                                            |
|                         |                      | Secreted Factors                                                                                      | Anti-Mullerian hormone, S100 calcium-binding protein A1, Hepatocyte growth factor activator, Follistatin, Secreted frizzled-related protein 1                                                                                                                                                                                                                                                                                                                                                                                                                                                                                                                                                                                                                                                                                                                                                                                                                                                                                                                                                                                                                                                                                                                                               |
| ECM-Enriched            | Core Matrisome       | Collagens                                                                                             | Collagen-type XI- $\alpha$ 1 chain, Collagen-type V- $\alpha$ 1 chain                                                                                                                                                                                                                                                                                                                                                                                                                                                                                                                                                                                                                                                                                                                                                                                                                                                                                                                                                                                                                                                                                                                                                                                                                       |
|                         |                      | ECM Glycoproteins                                                                                     | Von Willebrand factor A domain-containing protein 1                                                                                                                                                                                                                                                                                                                                                                                                                                                                                                                                                                                                                                                                                                                                                                                                                                                                                                                                                                                                                                                                                                                                                                                                                                         |
|                         | Matrisome-associated | ECM Regulators                                                                                        | Trypsin 10                                                                                                                                                                                                                                                                                                                                                                                                                                                                                                                                                                                                                                                                                                                                                                                                                                                                                                                                                                                                                                                                                                                                                                                                                                                                                  |
| ECM-affiliated Proteins |                      | Mannose-binding protein A, Complement component 1Q subunit B, C-type lectin domain family 10 member A |                                                                                                                                                                                                                                                                                                                                                                                                                                                                                                                                                                                                                                                                                                                                                                                                                                                                                                                                                                                                                                                                                                                                                                                                                                                                                             |
| Both                    | Core matrisome       | Collagens                                                                                             | Collagen-type V- $\alpha$ 2 chain, Collagen-type III- $\alpha$ 1 chain, Collagen-type IV- $\alpha$ 1 chain, Collagen-type IV- $\alpha$ 2 chain, Collagen-type VI- $\alpha$ 6 chain, Collagen-type I- $\alpha$ 2 chain, Collagen-type XV- $\alpha$ 1 chain, Collagen-type I- $\alpha$ 1 chain, Collagen-type XVIII- $\alpha$ 1 chain, Collagen-type VI- $\alpha$ 2 chain, Collagen-type VI- $\alpha$ 1 chain, Collagen-type VI- $\alpha$ 4 chain, Collagen-type VI- $\alpha$ 4 chain, Collagen-type VI- $\alpha$ 5 chain, Collagen-type XII- $\alpha$ 1 chain, Collagen-type VI- $\alpha$ 3 chain                                                                                                                                                                                                                                                                                                                                                                                                                                                                                                                                                                                                                                                                                            |
|                         |                      | ECM Glycoproteins                                                                                     | Periostin, Growth arrest-specific protein 6, Microfibrillar-associated protein 2, SPARC, Peroxidase, Latent-transforming growth factor beta-binding protein 3, EGF-containing fibulin-like extracellular matrix protein 2, Laminin gamma 3, Vitronectin, Procollagen C-endopeptidase enhancer 1, Matrilin-2, Latent-transforming growth factor beta-binding protein 4, Dermopontin, Latent-transforming growth factor beta-binding protein 1, Extracellular matrix protein 1, Tubulointerstitial nephritis antigen-like, Insulin-like growth factor-binding protein 7, Fibulin-1, Thrombospondin-4, Lactadherin, Zona pellucida sperm-binding protein 1, Zona pellucida sperm-binding protein 3, Adipocyte enhancer-binding protein 1, Fibrinogen alpha chain, EGF-containing fibulin-like extracellular matrix protein 1, Fibrinogen gamma, Elastin microfibril interface-located protein 1, Fibrillin-2, Zona pellucida sperm-binding protein 2, Von Willebrand factor A domain-containing protein 5a, Fibrinogen beta chain, Laminin alpha 5, Transforming growth factor-beta-induced, Nidogen-2, Laminin alpha 4, Thrombospondin-1, Agrin, Laminin alpha 2, Nidogen-1, Laminin beta 1, Laminin beta 2, Laminin gamma 1, Fibronectin, Laminin alpha 1, Tenascin-X, Fibrillin-1, Tenascin |
|                         | Matrisome-associated | Proteoglycans                                                                                         | Basement membrane-specific heparan sulfate proteoglycan core protein, Mimecan, Asporin, Lumican, Biglycan, Decorin, Prolargin                                                                                                                                                                                                                                                                                                                                                                                                                                                                                                                                                                                                                                                                                                                                                                                                                                                                                                                                                                                                                                                                                                                                                               |
|                         |                      | ECM Regulators                                                                                        | Alpha-2-antiplasmin, Alpha-1-microglobulin/bikunin precursor, N-glycanase 1, Coagulation factor IX, Disintegrin and metalloproteinase domain-containing protein 10, Cathepsin F, Coagulation factor X, Coagulation factor XVIII A chain, Antithrombin-III, Cathepsin Z, Cathepsin L, Disintegrin and metalloproteinase domain-containing protein 9, High-temperature requirement A serine peptidase 1, Astacin-like metalloendopeptidase, Serine protease inhibitor B6B, Serine protease                                                                                                                                                                                                                                                                                                                                                                                                                                                                                                                                                                                                                                                                                                                                                                                                    |

|                         |                                                                                                                                                                                                                                                                                                                           |
|-------------------------|---------------------------------------------------------------------------------------------------------------------------------------------------------------------------------------------------------------------------------------------------------------------------------------------------------------------------|
| ECM-affiliated Proteins | inhibitor A3K, Serine protease inhibitor A3G, Histidine-rich glycoprotein, Cathepsin B, Cathepsin D, Serine protease inhibitor B9, Inter-alpha-trypsin inhibitor heavy chain 5, Leukocyte elastase inhibitor A, Serine protease inhibitor H1, Transglutaminase 2, Plasminogen                                             |
| Secreted Factors        | Plexin-A1, Glypican-4, Plexin-B1, Glypican-1, Collectin-12, Galectin-9, Mannose-binding protein C, Galectin-1, Galectin-3, Annexin A11, Lectin mannose-binding 1, Plexin-B2, Annexin A7, Annexin A3, Annexin A4, Annexin A5, Annexin A1, Annexin A2, Annexin A6                                                           |
|                         | Wnt-4, S100 calcium-binding protein A11, S100 calcium-binding protein A6, S100 calcium-binding protein A10, S100 calcium-binding protein A4, Inhibin alpha chain, Secreted frizzled-related protein 4, Host cell factor 1, S100 calcium-binding protein A16, S100 calcium-binding protein A16, Fibroblast growth factor 2 |

**Supplementary Table 6. Matrisome proteins significantly altered with advanced age.**

| Change in expression with age | Experimental group                                   | Division                             | Category                | Protein names                                                                                                                                                    |
|-------------------------------|------------------------------------------------------|--------------------------------------|-------------------------|------------------------------------------------------------------------------------------------------------------------------------------------------------------|
| Upregulated                   | Native                                               | Core matrisome                       | Collagens               | Collagen-type VI- $\alpha$ 6 chain                                                                                                                               |
|                               |                                                      |                                      | ECM Glycoproteins       | Dermatopontin, Transforming growth factor-beta-induced                                                                                                           |
|                               |                                                      |                                      | Proteoglycans           | Asporin, Biglycan                                                                                                                                                |
|                               |                                                      | Matrisome-associated                 | ECM Regulators          | Cathepsin C, Cathepsin B, Cathepsin S, Heparin cofactor 2                                                                                                        |
|                               |                                                      |                                      | ECM-affiliated Proteins | Galectin-7                                                                                                                                                       |
|                               |                                                      |                                      | Secreted Factors        | Fibroblast growth factor 2, Secreted frizzled-related protein 1, Secreted frizzled-related protein 4, S100 calcium-binding protein A1                            |
|                               | ECM-Enriched                                         | Core matrisome                       | ECM Glycoproteins       | Fibrinogen alpha chain, Fibrinogen beta chain                                                                                                                    |
|                               |                                                      |                                      | Proteoglycans           | Mimecan                                                                                                                                                          |
|                               |                                                      |                                      | ECM Regulators          | Cathepsin F, Cathepsin L, Coagulation factor IX, Histidine-rich glycoprotein                                                                                     |
|                               |                                                      | Matrisome-associated                 | ECM-affiliated Proteins | Glypican-1                                                                                                                                                       |
|                               |                                                      |                                      | Secreted Factors        | S100 calcium-binding protein A10, S100 calcium-binding protein A13, S100 calcium-binding protein A16                                                             |
|                               |                                                      |                                      | Both                    | Core matrisome                                                                                                                                                   |
| Proteoglycans                 | Decorin, Lumican                                     |                                      |                         |                                                                                                                                                                  |
| ECM Regulators                | Alpha-1-microglobulin/bikunin precursor, Cathepsin D |                                      |                         |                                                                                                                                                                  |
| Matrisome-associated          | ECM-affiliated Proteins                              | Ficolin-1, Mannose-binding protein C |                         |                                                                                                                                                                  |
|                               | Secreted Factors                                     | Wnt-4                                |                         |                                                                                                                                                                  |
|                               | Downregulated                                        | Native                               |                         | Core matrisome                                                                                                                                                   |
| Matrisome-associated          |                                                      |                                      | Glia-derived nexin      |                                                                                                                                                                  |
| Secreted Factors              |                                                      |                                      | Anti-Mullerian hormone  |                                                                                                                                                                  |
| ECM-Enriched                  |                                                      | Core matrisome                       | Collagens               | Collagen-type XI- $\alpha$ 1 chain                                                                                                                               |
|                               |                                                      |                                      | ECM Glycoproteins       | Fibulin-1, Fibrillin-2, Thrombospondin-1, Zona pellucida sperm-binding protein 1, Zona pellucida sperm-binding protein 2, Zona pellucida sperm-binding protein 3 |
|                               |                                                      |                                      | Proteoglycans           | Versican                                                                                                                                                         |

|      |                      |                                                               |                                                                                                              |
|------|----------------------|---------------------------------------------------------------|--------------------------------------------------------------------------------------------------------------|
|      | Matrisome-associated | ECM Regulators<br>ECM-affiliated Proteins<br>Secreted Factors | Serpin H1, Trypsin 10<br>Annexin A3, Annexin A5<br>S100 calcium-binding protein A4                           |
|      | Core matrisome       | ECM Glycoproteins                                             | Thrombospondin-4                                                                                             |
| Both | Matrisome-associated | ECM Regulators<br>Secreted Factors                            | Astacin-like metalloendopeptidase,<br>Procollagen-lysine 2-oxoglutarate 5-dioxygenase<br>Inhibin alpha chain |
