# Supplementary material for: Proteomic quantification of native and ECM-enriched mouse ovaries reveals an age-dependent fibro-inflammatory signature
Source: Aging (Albany NY). 2023 Oct 27;15(20):10821–55. doi: 10.18632/aging.205190 (PMC10637783; doi:10.18632/aging.205190)
Supplement: Supplementary Table 1 [file aging-15-205190-s002.xlsx]

## Sheet: Native Protein Identifications
Supplementary Table 1. All protein identifications in native mouse ovaries.
Young and Old Native Mouse Ovaries			4084 total proteins with 2 peptide minimum
all proteins - all conditions - significant and not significant
Valid	Comparison (group1/group2)	Condition Numerator	Condition Denominator	# of Ratios	Group	AVG Group Quantity Denominator	AVG Group Quantity Numerator	AVG Log2 Ratio	Absolute AVG Log2 Ratio	% Change	Ratio	Standard Deviation	Pvalue	Qvalue	Degrees Of Freedom	Standard Error	ProteinGroups	ProteinNames	ProteinDescriptions	Genes	UniProtIds	Organisms	GO Biological Process	GO Molecular Function	GO Cellular Component	Database	Protein Existence	Sequence Version	FASTAName	FASTAHeader	# Unique Total Peptides	# Unique Total EG.Id
TRUE	Old_Native / Young_Native	Old_Native	Young_Native	495	Q80YX1	3.20123e+06	7.41501e+06	1.21182	1.21182	131.63	2.3163	0	1.07359e-85	2.41343e-82	494	0.0606459	Q80YX1	TENA_MOUSE	Tenascin	Tnc	Q80YX1	Mus musculus	osteoblast differentiation,cell adhesion,negative regulation of cell adhesion,neuromuscular junction development,positive regulation of cell proliferation,response to mechanical stimulus,positive regulation of gene expression,peripheral nervous system axon regeneration,wound healing,odontogenesis of dentin-containing tooth,response to ethanol,bud outgrowth involved in lung branching,mesenchymal-e…	fibronectin binding,syndecan binding	extracellular region,basement membrane,interstitial matrix,extracellular space,focal adhesion,membrane,extracellular matrix	sp	1	1	uniprot_mouse_proteome	>sp|Q80YX1|TENA_MOUSE Tenascin OS=Mus musculus GN=Tnc PE=1 SV=1	73	99
TRUE	Old_Native / Young_Native	Old_Native	Young_Native	430	E9PX70;Q60847;Q60847-2;Q60847-5	2.24391e+06	3.2241e+06	0.522884	0.522884	43.6825	1.43683	0	1.14318e-74	1.28494e-71	429	0.0226154	E9PX70;Q60847;Q60847-2;Q60847-5	E9PX70_MOUSE;COCA1_MOUSE;COCA1_MOUSE;COCA1_MOUSE	Collagen alpha-1(XII) chain;Collagen alpha-1(XII) chain;Isoform 2 of Collagen alpha-1(XII) chain;Isoform 5 of Collagen alpha-1(XII) chain	Col12a1	E9PX70;Q60847;Q60847-2;Q60847-5	Mus musculus	;cell adhesion,endodermal cell differentiation;;	;;;	;proteinaceous extracellular matrix,collagen trimer,extracellular space,extracellular matrix,extracellular exosome,extracellular vesicle;;	tr;sp;sp;sp	1;2;;	1;3;;	uniprot_mouse_proteome	>tr|E9PX70|E9PX70_MOUSE Collagen alpha-1(XII) chain OS=Mus musculus GN=Col12a1 PE=1 SV=1;>sp|Q60847|COCA1_MOUSE Collagen alpha-1(XII) chain OS=Mus musculus GN=Col12a1 PE=2 SV=3;>sp|Q60847-2|COCA1_MOUSE Isoform 2 of Collagen alpha-1(XII) chain OS=Mus musculus GN=Col12a1;>sp|Q60847-5|COCA1_MOUSE Isoform 5 of Collagen alpha-1(XII) chain OS=Mus musculus GN=Col12a1	77	86
TRUE	Old_Native / Young_Native	Old_Native	Young_Native	395	Q921I1	23054788	32480334	0.4945	0.4945	40.8832	1.40883	0	1.20016e-56	8.99322e-54	394	0.0256483	Q921I1	TRFE_MOUSE	Serotransferrin	Tf	Q921I1	Mus musculus	iron ion transport,cellular iron ion homeostasis,actin filament organization,activation of JUN kinase activity,ferric iron transport,osteoclast differentiation,positive regulation of phosphorylation,positive regulation of bone resorption,positive regulation of transcription, DNA-templated,positive regulation of receptor-mediated endocytosis,SMAD protein signal transduction,ERK1 and ERK2 cascade,c…	protein binding,ferrous iron binding,ferric iron binding,ferric iron transmembrane transporter activity,transferrin receptor binding	extracellular region,extracellular space,endosome,early endosome,late endosome,clathrin-coated pit,basal plasma membrane,cell surface,membrane,apical plasma membrane,vesicle coat,endocytic vesicle,extrinsic component of external side of plasma membrane,cytoplasmic vesicle,vesicle,basal part of cell,perinuclear region of cytoplasm,recycling endosome,extracellular exosome,blood microparticle,dense …	sp	1	1	uniprot_mouse_proteome	>sp|Q921I1|TRFE_MOUSE Serotransferrin OS=Mus musculus GN=Tf PE=1 SV=1	44	79
TRUE	Old_Native / Young_Native	Old_Native	Young_Native	330	O35452	946469	1.5719e+06	0.731885	0.731885	66.0808	1.66081	0	2.3713e-54	1.33267e-51	329	0.0663349	O35452	O35452_MOUSE	Protein Tnxb	Tnxb	O35452	Mus musculus	lipid metabolic process,fatty acid metabolic process,triglyceride metabolic process,cell-matrix adhesion,extracellular matrix organization,collagen fibril organization,collagen metabolic process,regulation of JUN kinase activity,elastic fiber assembly,cell-cell adhesion,phospholipid metabolic process,positive regulation of cell adhesion	collagen binding,heparin binding	extracellular region,proteinaceous extracellular matrix,extracellular space,intracellular,extracellular matrix,extracellular exosome,fibrillar collagen trimer	tr	1	1	uniprot_mouse_proteome	>tr|O35452|O35452_MOUSE Protein Tnxb OS=Mus musculus GN=Tnxb PE=1 SV=1	63	66
TRUE	Old_Native / Young_Native	Old_Native	Young_Native	160	Q8K3V4	7883088	1.87503e+06	-2.07184	2.07184	-76.2145	0.237855	0	1.64751e-48	7.4072e-46	159	0.107856	Q8K3V4	PADI6_MOUSE	Protein-arginine deiminase type-6	Padi6	Q8K3V4	Mus musculus	cytoskeleton organization,cytoplasm organization,protein citrullination,cellular protein localization,histone citrullination,regulation of translation by machinery localization	protein-arginine deiminase activity,calcium ion binding,protein binding	nucleus,cytoplasm,intermediate filament cytoskeleton	sp	1	2	uniprot_mouse_proteome	>sp|Q8K3V4|PADI6_MOUSE Protein-arginine deiminase type-6 OS=Mus musculus GN=Padi6 PE=1 SV=2	22	32
TRUE	Old_Native / Young_Native	Old_Native	Young_Native	345	P48678	13484640	17916718	0.409989	0.409989	32.8676	1.32868	0	2.01954e-48	7.56656e-46	344	0.0217482	P48678	LMNA_MOUSE	Prelamin-A/C	Lmna	P48678	Mus musculus	nucleus organization,nuclear envelope organization,muscle organ development,negative regulation of cell proliferation,positive regulation of gene expression,establishment of cell polarity,regulation of cell migration,establishment or maintenance of microtubule cytoskeleton polarity,regulation of telomere maintenance,protein localization to nucleus,cellular protein localization,sterol regulatory e…	structural molecule activity,protein binding,identical protein binding	nucleus,nuclear envelope,lamin filament,nucleoplasm,extracellular matrix,nuclear membrane,perinuclear region of cytoplasm	sp	1	2	uniprot_mouse_proteome	>sp|P48678|LMNA_MOUSE Prelamin-A/C OS=Mus musculus GN=Lmna PE=1 SV=2	43	69
TRUE	Old_Native / Young_Native	Old_Native	Young_Native	1120	Q9QXS1;Q9QXS1-2	3.11789e+06	3.63363e+06	0.220841	0.220841	16.5413	1.16541	0	2.16195e-42	6.94295e-40	1119	0.0203551	Q9QXS1;Q9QXS1-2	PLEC_MOUSE	Plectin;Isoform PLEC-1 of Plectin	Plec	Q9QXS1;Q9QXS1-2	Mus musculus	hemidesmosome assembly;	RNA binding,actin binding,protein binding,structural constituent of muscle,ankyrin binding,cadherin binding;	cytosol,brush border,focal adhesion,hemidesmosome,extracellular matrix,sarcolemma,contractile fiber,intermediate filament cytoskeleton,extracellular exosome;	sp	1;	3;	uniprot_mouse_proteome	>sp|Q9QXS1|PLEC_MOUSE Plectin OS=Mus musculus GN=Plec PE=1 SV=3;>sp|Q9QXS1-2|PLEC_MOUSE Isoform PLEC-1 of Plectin OS=Mus musculus GN=Plec	195	224
TRUE	Old_Native / Young_Native	Old_Native	Young_Native	115	P09528	10218039	23376848	1.19396	1.19396	128.78	2.2878	0	4.41869e-42	1.24165e-39	114	0.0544412	P09528	FRIH_MOUSE	Ferritin heavy chain	Fth1	P09528	Mus musculus	intracellular sequestering of iron ion,receptor-mediated endocytosis,immune response,negative regulation of cell proliferation,negative regulation of fibroblast proliferation,oxidation-reduction process,iron ion import	ferroxidase activity,iron ion binding,ferric iron binding	extracellular region,nucleus,mitochondrion,autolysosome,extracellular exosome,endocytic vesicle lumen	sp	1	2	uniprot_mouse_proteome	>sp|P09528|FRIH_MOUSE Ferritin heavy chain OS=Mus musculus GN=Fth1 PE=1 SV=2	12	23
TRUE	Old_Native / Young_Native	Old_Native	Young_Native	320	P06795	4379179	12117284	1.46833	1.46833	176.702	2.76702	0	1.05764e-39	2.64175e-37	319	0.0874783	P06795	MDR1B_MOUSE	Multidrug resistance protein 1B	Abcb1b	P06795	Mus musculus	drug transmembrane transport,xenobiotic transport	ATP binding,xenobiotic-transporting ATPase activity	mitochondrion,plasma membrane,integral component of membrane,intercellular canaliculus	sp	1	1	uniprot_mouse_proteome	>sp|P06795|MDR1B_MOUSE Multidrug resistance protein 1B OS=Mus musculus GN=Abcb1b PE=1 SV=1	43	64
TRUE	Old_Native / Young_Native	Old_Native	Young_Native	290	E9Q6R7	557600	735943	0.400363	0.400363	31.984	1.31984	0	6.94304e-37	1.5608e-34	289	0.0353303	E9Q6R7	E9Q6R7_MOUSE	Protein Utrn	Utrn	E9Q6R7	Mus musculus	positive regulation of cell-matrix adhesion,adult somatic muscle development,neuromuscular junction development,response to denervation involved in regulation of muscle adaptation	actin binding,integrin binding,protein binding,zinc ion binding,vinculin binding,protein kinase binding,actin filament binding	nucleoplasm,cytoplasm,plasma membrane,dystrophin-associated glycoprotein complex,filopodium,growth cone,cortical actin cytoskeleton,filopodium membrane,neuromuscular junction,sarcolemma,protein complex,synapse,postsynaptic membrane,extracellular exosome,contractile ring	tr	1	1	uniprot_mouse_proteome	>tr|E9Q6R7|E9Q6R7_MOUSE Protein Utrn OS=Mus musculus GN=Utrn PE=1 SV=1	55	58
TRUE	Old_Native / Young_Native	Old_Native	Young_Native	120	Q9R1M5;Q9R1M5-2;Q9R1M5-3;Q9R1M5-6	955347	312093	-1.61405	1.61405	-67.332	0.32668	0	2.30949e-35	4.71975e-33	119	0.133533	Q9R1M5;Q9R1M5-2;Q9R1M5-3;Q9R1M5-6	NALP5_MOUSE	NACHT, LRR and PYD domains-containing protein 5;Isoform 2 of NACHT, LRR and PYD domains-containing protein 5;Isoform 3 of NACHT, LRR and PYD domains-containing protein 5;Isoform 6 of NACHT, LRR and PYD domains-containing protein 5	Nlrp5	Q9R1M5;Q9R1M5-2;Q9R1M5-3;Q9R1M5-6	Mus musculus	in utero embryonic development,embryo implantation,fertilization,animal organ morphogenesis,regulation of protein stability,cellular protein localization,regulation of RNA stability,cellular protein complex assembly,neuron death;;;	protein binding,ATP binding;;;	nucleolus,cytoplasm,mitochondrion,cytosol,cell cortex,protein complex,apical cortex;;;	sp	1;;;	2;;;	uniprot_mouse_proteome	>sp|Q9R1M5|NALP5_MOUSE NACHT, LRR and PYD domains-containing protein 5 OS=Mus musculus GN=Nlrp5 PE=1 SV=2;>sp|Q9R1M5-2|NALP5_MOUSE Isoform 2 of NACHT, LRR and PYD domains-containing protein 5 OS=Mus musculus GN=Nlrp5;>sp|Q9R1M5-3|NALP5_MOUSE Isoform 3 of NACHT, LRR and PYD domains-containing protein 5 OS=Mus musculus GN=Nlrp5;>sp|Q9R1M5-6|NALP5_MOUSE Isoform 6 of NACHT, LRR and PYD domains-contai…	21	24
TRUE	Old_Native / Young_Native	Old_Native	Young_Native	455	E9QP46;Q6ZWQ0	553720	505459	-0.131562	0.131562	-8.71573	0.912843	0	1.15203e-31	1.99213e-29	454	0.0199341	E9QP46;Q6ZWQ0	E9QP46_MOUSE;SYNE2_MOUSE	Nesprin-2	Syne2	E9QP46;Q6ZWQ0	Mus musculus	;nuclear envelope organization,nuclear migration,establishment or maintenance of cell polarity,fibroblast migration,nucleokinesis involved in cell motility in cerebral cortex radial glia guided migration,positive regulation of cell migration,nuclear migration along microfilament,protein localization to nucleus,centrosome localization,cytoskeletal anchoring at nuclear membrane,regulation of cilium…	;actin binding,actin filament binding	;nucleus,nuclear envelope,nuclear outer membrane,nucleoplasm,cytoplasm,mitochondrion,focal adhesion,integral component of membrane,aggresome,sarcoplasmic reticulum,Z disc,lamellipodium membrane,filopodium membrane,nuclear membrane,nuclear lumen,sarcoplasmic reticulum membrane,LINC complex,intermediate filament cytoskeleton,extracellular exosome,myofibril	tr;sp	1	1;2	uniprot_mouse_proteome	>tr|E9QP46|E9QP46_MOUSE Nesprin-2 OS=Mus musculus GN=Syne2 PE=1 SV=1;>sp|Q6ZWQ0|SYNE2_MOUSE Nesprin-2 OS=Mus musculus GN=Syne2 PE=1 SV=2	89	91
TRUE	Old_Native / Young_Native	Old_Native	Young_Native	185	E9PZD8;G3X8Q5;G3X9T8;Q61147	1.7816e+06	2.71172e+06	0.606039	0.606039	52.2075	1.52207	0	1.12887e-31	1.99213e-29	184	0.0598977	E9PZD8;G3X8Q5;G3X9T8;Q61147	E9PZD8_MOUSE;G3X8Q5_MOUSE;G3X9T8_MOUSE;CERU_MOUSE	Ceruloplasmin	Cp	E9PZD8;G3X8Q5;G3X9T8;Q61147	Mus musculus	;;;copper ion transport,cellular iron ion homeostasis,oxidation-reduction process	;;;ferroxidase activity,copper ion binding,chaperone binding	;;;extracellular space,lysosomal membrane,extracellular exosome,blood microparticle	tr;tr;tr;sp	1	1;1;1;2	uniprot_mouse_proteome	>tr|E9PZD8|E9PZD8_MOUSE Ceruloplasmin OS=Mus musculus GN=Cp PE=1 SV=1;>tr|G3X8Q5|G3X8Q5_MOUSE Ceruloplasmin OS=Mus musculus GN=Cp PE=1 SV=1;>tr|G3X9T8|G3X9T8_MOUSE Ceruloplasmin OS=Mus musculus GN=Cp PE=1 SV=1;>sp|Q61147|CERU_MOUSE Ceruloplasmin OS=Mus musculus GN=Cp PE=1 SV=2	30	37
TRUE	Old_Native / Young_Native	Old_Native	Young_Native	1160	E9Q616	13880828	15737393	0.181103	0.181103	13.375	1.13375	0	2.62185e-30	4.05838e-28	1159	0.0211705	E9Q616	E9Q616_MOUSE	Protein Ahnak	Ahnak	E9Q616	Mus musculus	regulation of RNA splicing,protein oligomerization,regulation of voltage-gated calcium channel activity	RNA binding,S100 protein binding,cadherin binding,structural molecule activity conferring elasticity	nucleus,cytoplasm,lysosomal membrane,cytosol,plasma membrane,cell-cell junction,focal adhesion,actin cytoskeleton,membrane,vesicle,sarcolemma,costamere,cell-cell contact zone,extracellular exosome,T-tubule,membrane raft	tr	1	1	uniprot_mouse_proteome	>tr|E9Q616|E9Q616_MOUSE Protein Ahnak OS=Mus musculus GN=Ahnak PE=1 SV=1	190	232
TRUE	Old_Native / Young_Native	Old_Native	Young_Native	145	O08532;O08532-2;O08532-3	714679	1.02423e+06	0.519173	0.519173	43.3133	1.43313	0	2.708e-30	4.05838e-28	144	0.0385486	O08532;O08532-2;O08532-3	CA2D1_MOUSE	Voltage-dependent calcium channel subunit alpha-2/delta-1;Isoform 2B of Voltage-dependent calcium channel subunit alpha-2/delta-1;Isoform 2C of Voltage-dependent calcium channel subunit alpha-2/delta-1	Cacna2d1	O08532;O08532-2;O08532-3	Mus musculus	calcium ion transport,regulation of calcium ion transport,regulation of ventricular cardiac muscle cell membrane repolarization,calcium ion transport into cytosol,calcium ion transmembrane transport via high voltage-gated calcium channel,calcium ion transmembrane transport,cardiac muscle cell action potential involved in contraction,membrane depolarization during bundle of His cell action potenti…	voltage-gated calcium channel activity,protein binding,metal ion binding,voltage-gated calcium channel activity involved in bundle of His cell action potential;;	voltage-gated calcium channel complex,sarcoplasmic reticulum,T-tubule,extracellular exosome,L-type voltage-gated calcium channel complex;;	sp	1;;	1;;	uniprot_mouse_proteome	>sp|O08532|CA2D1_MOUSE Voltage-dependent calcium channel subunit alpha-2/delta-1 OS=Mus musculus GN=Cacna2d1 PE=1 SV=1;>sp|O08532-2|CA2D1_MOUSE Isoform 2B of Voltage-dependent calcium channel subunit alpha-2/delta-1 OS=Mus musculus GN=Cacna2d1;>sp|O08532-3|CA2D1_MOUSE Isoform 2C of Voltage-dependent calcium channel subunit alpha-2/delta-1 OS=Mus musculus GN=Cacna2d1	28	29
TRUE	Old_Native / Young_Native	Old_Native	Young_Native	170	Q70IV5;Q70IV5-2	634352	1.14493e+06	0.851904	0.851904	80.4881	1.80488	0	3.12843e-29	4.39544e-27	169	0.0570551	Q70IV5;Q70IV5-2	SYNEM_MOUSE	Synemin;Isoform 2 of Synemin	Synm	Q70IV5;Q70IV5-2	Mus musculus	fast-twitch skeletal muscle fiber contraction,intermediate filament cytoskeleton organization;	structural constituent of cytoskeleton,protein binding,structural constituent of muscle,vinculin binding,intermediate filament binding,protein binding, bridging;	intermediate filament,adherens junction,membrane,Z disc,sarcolemma,costamere,intermediate filament cytoskeleton,neurofilament cytoskeleton;	sp	1;	2;	uniprot_mouse_proteome	>sp|Q70IV5|SYNEM_MOUSE Synemin OS=Mus musculus GN=Synm PE=1 SV=2;>sp|Q70IV5-2|SYNEM_MOUSE Isoform 2 of Synemin OS=Mus musculus GN=Synm	32	34
TRUE	Old_Native / Young_Native	Old_Native	Young_Native	160	P82198	2.47753e+06	4.53455e+06	0.872059	0.872059	83.0273	1.83027	0	6.20222e-29	8.20152e-27	159	0.0740441	P82198	BGH3_MOUSE	Transforming growth factor-beta-induced protein ig-h3	Tgfbi	P82198	Mus musculus	angiogenesis,chondrocyte differentiation,cell adhesion,cell proliferation,extracellular matrix organization	integrin binding,collagen binding,extracellular matrix binding	proteinaceous extracellular matrix,basement membrane,extracellular space,trans-Golgi network,extracellular matrix,extracellular exosome	sp	1	1	uniprot_mouse_proteome	>sp|P82198|BGH3_MOUSE Transforming growth factor-beta-induced protein ig-h3 OS=Mus musculus GN=Tgfbi PE=1 SV=1	24	32
TRUE	Old_Native / Young_Native	Old_Native	Young_Native	130	Q6B966	612096	220606	-1.47229	1.47229	-63.959	0.36041	0	8.83581e-29	1.10349e-26	129	0.145729	Q6B966	NAL14_MOUSE	NACHT, LRR and PYD domains-containing protein 14	Nlrp14	Q6B966	Mus musculus	multicellular organism development,spermatogenesis,cell differentiation	molecular_function,ATP binding	cellular_component	sp	2	2	uniprot_mouse_proteome	>sp|Q6B966|NAL14_MOUSE NACHT, LRR and PYD domains-containing protein 14 OS=Mus musculus GN=Nlrp14 PE=2 SV=2	25	26
TRUE	Old_Native / Young_Native	Old_Native	Young_Native	160	P31001	2.42185e+06	4.588e+06	0.921754	0.921754	89.4417	1.89442	0	1.3264e-25	1.56934e-23	159	0.0682674	P31001	DESM_MOUSE	Desmin	Des	P31001	Mus musculus	muscle organ development,intermediate filament organization	structural constituent of cytoskeleton,protein binding,cytoskeletal protein binding,identical protein binding	nucleus,cytoplasm,cytoskeleton,cell-cell junction,fascia adherens,intercalated disc,Z disc,neuromuscular junction,sarcolemma,contractile fiber,intermediate filament cytoskeleton,extracellular exosome,cardiac myofibril,intermediate filament	sp	1	3	uniprot_mouse_proteome	>sp|P31001|DESM_MOUSE Desmin OS=Mus musculus GN=Des PE=1 SV=3	26	32
TRUE	Old_Native / Young_Native	Old_Native	Young_Native	150	B2RQC6;E9QAI5	690335	457730	-0.5928	0.5928	-33.6945	0.663055	0	7.28272e-25	8.18578e-23	149	0.0499849	B2RQC6;E9QAI5	PYR1_MOUSE;E9QAI5_MOUSE	CAD protein	Cad	B2RQC6;E9QAI5	Mus musculus	urea cycle,liver development,'de novo' pyrimidine nucleobase biosynthetic process,UTP biosynthetic process,arginine biosynthetic process,glutamine metabolic process,heart development,female pregnancy,lactation,response to amine,drug metabolic process,peptidyl-threonine phosphorylation,citrulline biosynthetic process,response to caffeine,animal organ regeneration,response to insulin,response to te…	UTP binding,aspartate carbamoyltransferase activity,carbamoyl-phosphate synthase (ammonia) activity,carbamoyl-phosphate synthase (glutamine-hydrolyzing) activity,dihydroorotase activity,protein kinase activity,ATP binding,zinc ion binding,amino acid binding,enzyme binding,identical protein binding;	nucleus,nucleoplasm,cytoplasm,cytosol,membrane,nuclear matrix,neuronal cell body,terminal bouton,protein complex,extracellular exosome;	sp;tr	1	1	uniprot_mouse_proteome	>sp|B2RQC6|PYR1_MOUSE CAD protein OS=Mus musculus GN=Cad PE=1 SV=1;>tr|E9QAI5|E9QAI5_MOUSE CAD protein OS=Mus musculus GN=Cad PE=1 SV=1	30	30
TRUE	Old_Native / Young_Native	Old_Native	Young_Native	140	P16406	1.26528e+06	650763	-0.959257	0.959257	-48.5678	0.514322	0	1.41416e-23	1.51382e-21	139	0.0927709	P16406	AMPE_MOUSE	Glutamyl aminopeptidase	Enpep	P16406	Mus musculus	angiogenesis,angiotensin maturation,regulation of systemic arterial blood pressure by renin-angiotensin,regulation of blood pressure,cell proliferation,cell migration,glomerulus development,peptide catabolic process	aminopeptidase activity,peptidase activity,metallopeptidase activity,zinc ion binding,peptide binding,metalloaminopeptidase activity	lysosomal membrane,plasma membrane,brush border,external side of plasma membrane,integral component of membrane,apical plasma membrane,cytoplasmic vesicle,apical part of cell,extracellular exosome	sp	1	1	uniprot_mouse_proteome	>sp|P16406|AMPE_MOUSE Glutamyl aminopeptidase OS=Mus musculus GN=Enpep PE=1 SV=1	23	28
TRUE	Old_Native / Young_Native	Old_Native	Young_Native	60	P43276	22147078	9287962	-1.25368	1.25368	-58.0624	0.419376	0	2.25306e-23	2.30222e-21	59	0.0815088	P43276	H15_MOUSE	Histone H1.5	Hist1h1b	P43276	Mus musculus	nucleosome assembly,muscle organ development	DNA binding,protein binding	nucleosome,nucleus	sp	1	2	uniprot_mouse_proteome	>sp|P43276|H15_MOUSE Histone H1.5 OS=Mus musculus GN=Hist1h1b PE=1 SV=2	6	12
TRUE	Old_Native / Young_Native	Old_Native	Young_Native	140	Q61699;Q61699-2	1.39076e+06	966372	-0.525227	0.525227	-30.515	0.69485	0	4.19457e-23	4.09974e-21	139	0.0491309	Q61699;Q61699-2	HS105_MOUSE	Heat shock protein 105 kDa;Isoform HSP105-beta of Heat shock protein 105 kDa	Hsph1	Q61699;Q61699-2	Mus musculus	receptor-mediated endocytosis,response to unfolded protein,negative regulation of neuron apoptotic process,positive regulation of MHC class I biosynthetic process,positive regulation of transcription from RNA polymerase II promoter,chaperone mediated protein folding requiring cofactor,positive regulation of NK T cell activation,positive regulation of protein tyrosine kinase activity,regulation of…	adenyl-nucleotide exchange factor activity,protein binding,ATP binding,alpha-tubulin binding;	extracellular region,nucleus,nucleoplasm,cytoplasm,cytosol,protein complex,extracellular exosome,microtubule;	sp	1;	2;	uniprot_mouse_proteome	>sp|Q61699|HS105_MOUSE Heat shock protein 105 kDa OS=Mus musculus GN=Hsph1 PE=1 SV=2;>sp|Q61699-2|HS105_MOUSE Isoform HSP105-beta of Heat shock protein 105 kDa OS=Mus musculus GN=Hsph1	27	28
TRUE	Old_Native / Young_Native	Old_Native	Young_Native	155	A0A140T8T7;A0A140T8W1;A6H584	1.46087e+06	2.01192e+06	0.461744	0.461744	37.7206	1.37721	0	9.67221e-23	9.05964e-21	154	0.109265	A0A140T8T7;A0A140T8W1;A6H584	A0A140T8T7_MOUSE;A0A140T8W1_MOUSE;CO6A5_MOUSE	Collagen alpha-5(VI) chain	Col6a5	A0A140T8T7;A0A140T8W1;A6H584	Mus musculus	;;cell adhesion	;;molecular_function	;;extracellular region,proteinaceous extracellular matrix,collagen trimer	tr;tr;sp	1	1;1;4	uniprot_mouse_proteome	>tr|A0A140T8T7|A0A140T8T7_MOUSE Collagen alpha-5(VI) chain OS=Mus musculus GN=Col6a5 PE=1 SV=1;>tr|A0A140T8W1|A0A140T8W1_MOUSE Collagen alpha-5(VI) chain OS=Mus musculus GN=Col6a5 PE=1 SV=1;>sp|A6H584|CO6A5_MOUSE Collagen alpha-5(VI) chain OS=Mus musculus GN=Col6a5 PE=1 SV=4	27	31
TRUE	Old_Native / Young_Native	Old_Native	Young_Native	390	P11499	53388156	44825620	-0.252196	0.252196	-16.0383	0.839617	0	1.8755e-22	1.68645e-20	389	0.0369897	P11499	HS90B_MOUSE	Heat shock protein HSP 90-beta	Hsp90ab1	P11499	Mus musculus	placenta development,protein folding,telomere maintenance via telomerase,response to salt stress,response to organic substance,virion attachment to host cell,positive regulation of transforming growth factor beta receptor signaling pathway,regulation of protein ubiquitination,positive regulation of protein binding,negative regulation of proteasomal ubiquitin-dependent protein catabolic process,po…	UTP binding,CTP binding,RNA binding,double-stranded RNA binding,protein binding,ATP binding,GTP binding,drug binding,sulfonylurea receptor binding,kinase binding,protein kinase binding,MHC class II protein complex binding,nitric-oxide synthase regulator activity,TPR domain binding,heat shock protein binding,dATP binding,peptide binding,protein homodimerization activity,histone deacetylase binding…	extracellular region,intracellular,nucleus,cytoplasm,mitochondrion,lysosomal membrane,cytosol,cell surface,membrane,inclusion body,basolateral plasma membrane,apical plasma membrane,brush border membrane,aryl hydrocarbon receptor complex,melanosome,protein complex,extracellular exosome,sperm head plasma membrane,ooplasm,COP9 signalosome	sp	1	3	uniprot_mouse_proteome	>sp|P11499|HS90B_MOUSE Heat shock protein HSP 90-beta OS=Mus musculus GN=Hsp90ab1 PE=1 SV=3	41	78
TRUE	Old_Native / Young_Native	Old_Native	Young_Native	100	Q01339	2.20492e+06	2.99223e+06	0.440498	0.440498	35.7073	1.35707	0	4.98271e-22	4.30812e-20	99	0.0340897	Q01339	APOH_MOUSE	Beta-2-glycoprotein 1	Apoh	Q01339	Mus musculus	negative regulation of endothelial cell proliferation,triglyceride metabolic process,blood coagulation, intrinsic pathway,negative regulation of endothelial cell migration,negative regulation of angiogenesis,regulation of blood coagulation,negative regulation of blood coagulation,plasminogen activation,negative regulation of myeloid cell apoptotic process,negative regulation of smooth muscle cell…	phospholipid binding,heparin binding,lipid binding,identical protein binding,lipoprotein lipase activator activity	extracellular space,cell surface,extracellular matrix,very-low-density lipoprotein particle,high-density lipoprotein particle,chylomicron,extracellular exosome	sp	1	1	uniprot_mouse_proteome	>sp|Q01339|APOH_MOUSE Beta-2-glycoprotein 1 OS=Mus musculus GN=Apoh PE=1 SV=1	17	20
TRUE	Old_Native / Young_Native	Old_Native	Young_Native	100	Q19LI2	1.76716e+06	4714347	1.41562	1.41562	166.775	2.66775	0	1.34263e-21	1.11787e-19	99	0.111647	Q19LI2	A1BG_MOUSE	Alpha-1B-glycoprotein	A1bg	Q19LI2	Mus musculus	biological_process	molecular_function	extracellular region,extracellular space,extracellular matrix,extracellular exosome,blood microparticle	sp	1	1	uniprot_mouse_proteome	>sp|Q19LI2|A1BG_MOUSE Alpha-1B-glycoprotein OS=Mus musculus GN=A1bg PE=1 SV=1	17	20
TRUE	Old_Native / Young_Native	Old_Native	Young_Native	220	Q61292	1.10489e+06	1.39791e+06	0.339371	0.339371	26.5205	1.2652	0	5.2725e-21	4.23306e-19	219	0.0357518	Q61292	LAMB2_MOUSE	Laminin subunit beta-2	Lamb2	Q61292	Mus musculus	cell morphogenesis involved in differentiation,receptor-mediated endocytosis,cell adhesion,axon guidance,neuromuscular junction development,visual perception,astrocyte development,Schwann cell development,extracellular matrix organization,neuron projection development,axon extension involved in regeneration,synapse organization,retina development in camera-type eye,metanephric glomerular visceral…	integrin binding	extracellular region,basement membrane,basal lamina,laminin-3 complex,extracellular space,extracellular matrix,synaptic cleft,laminin complex,synapse,extracellular exosome	sp	1	2	uniprot_mouse_proteome	>sp|Q61292|LAMB2_MOUSE Laminin subunit beta-2 OS=Mus musculus GN=Lamb2 PE=1 SV=2	38	44
TRUE	Old_Native / Young_Native	Old_Native	Young_Native	95	Q8CGN5	727192	465068	-0.644894	0.644894	-36.046	0.63954	0	6.86784e-21	5.32376e-19	94	0.0654674	Q8CGN5	PLIN1_MOUSE	Perilipin-1	Plin1	Q8CGN5	Mus musculus	lipid catabolic process,triglyceride catabolic process	protein binding	endoplasmic reticulum,lipid particle,cytosol	sp	1	2	uniprot_mouse_proteome	>sp|Q8CGN5|PLIN1_MOUSE Perilipin-1 OS=Mus musculus GN=Plin1 PE=1 SV=2	16	19
TRUE	Old_Native / Young_Native	Old_Native	Young_Native	195	B1AZ14;B1AZ15;Q3UMF0-2;Q3UMF0-4	569043	812937	0.514605	0.514605	42.8603	1.4286	0	7.6168e-21	5.70753e-19	194	0.0551354	B1AZ14;B1AZ15;Q3UMF0-2;Q3UMF0-4	B1AZ14_MOUSE;B1AZ15_MOUSE;COBL1_MOUSE;COBL1_MOUSE	Cordon-bleu protein-like 1;Cordon-bleu protein-like 1;Isoform 2 of Cordon-bleu protein-like 1;Isoform 4 of Cordon-bleu protein-like 1	Cobll1	B1AZ14;B1AZ15;Q3UMF0-2;Q3UMF0-4	Mus musculus	;;;	;;;	;;;	tr;tr;sp;sp	1;1;;	1;1;;	uniprot_mouse_proteome	>tr|B1AZ14|B1AZ14_MOUSE Cordon-bleu protein-like 1 OS=Mus musculus GN=Cobll1 PE=1 SV=1;>tr|B1AZ15|B1AZ15_MOUSE Cordon-bleu protein-like 1 OS=Mus musculus GN=Cobll1 PE=1 SV=1;>sp|Q3UMF0-2|COBL1_MOUSE Isoform 2 of Cordon-bleu protein-like 1 OS=Mus musculus GN=Cobll1;>sp|Q3UMF0-4|COBL1_MOUSE Isoform 4 of Cordon-bleu protein-like 1 OS=Mus musculus GN=Cobll1	36	39
TRUE	Old_Native / Young_Native	Old_Native	Young_Native	185	M0QWP1	439305	592398	0.431343	0.431343	34.8489	1.34849	0	1.05247e-20	7.6321e-19	184	0.0491825	M0QWP1	M0QWP1_MOUSE	Agrin	Agrn	M0QWP1	Mus musculus				tr	1	1	uniprot_mouse_proteome	>tr|M0QWP1|M0QWP1_MOUSE Agrin OS=Mus musculus GN=Agrn PE=1 SV=1	32	37
TRUE	Old_Native / Young_Native	Old_Native	Young_Native	135	Q8BW75	1.43956e+06	4419427	1.61824	1.61824	206.999	3.06999	0	1.17304e-20	8.24062e-19	134	0.165478	Q8BW75	AOFB_MOUSE	Amine oxidase [flavin-containing] B	Maob	Q8BW75	Mus musculus	response to toxic substance,response to aluminum ion,response to selenium ion,negative regulation of serotonin secretion,substantia nigra development,response to lipopolysaccharide,neurotransmitter catabolic process,response to drug,response to ethanol,positive regulation of dopamine metabolic process,response to corticosterone,oxidation-reduction process	primary amine oxidase activity,protein homodimerization activity,flavin adenine dinucleotide binding	mitochondrion,mitochondrial outer membrane,mitochondrial inner membrane,integral component of membrane,extracellular exosome	sp	1	4	uniprot_mouse_proteome	>sp|Q8BW75|AOFB_MOUSE Amine oxidase [flavin-containing] B OS=Mus musculus GN=Maob PE=1 SV=4	20	27
TRUE	Old_Native / Young_Native	Old_Native	Young_Native	65	A0A075B5P6;A0A075B6A0;P01872;P01872-2	306925	869519	1.50233	1.50233	183.3	2.833	0	1.74619e-20	1.18953e-18	64	0.121865	A0A075B5P6;A0A075B6A0;P01872;P01872-2	A0A075B5P6_MOUSE;A0A075B6A0_MOUSE;IGHM_MOUSE;IGHM_MOUSE	Ig mu chain C region (Fragment);Ig mu chain C region (Fragment);Ig mu chain C region;Isoform 2 of Ig mu chain C region	Ighm	A0A075B5P6;A0A075B6A0;P01872;P01872-2	Mus musculus	;;activation of MAPK activity,B cell affinity maturation,humoral immune response mediated by circulating immunoglobulin,regulation of immunoglobulin production,phagocytosis, recognition,phagocytosis, engulfment,complement activation, classical pathway,immunoglobulin mediated immune response,antigen processing and presentation,regulation of cell morphogenesis,positive regulation of B cell prolifer…	;;antigen binding,transmembrane signaling receptor activity,protein binding,immunoglobulin receptor binding,identical protein binding;	;;extracellular space,cytosol,plasma membrane,external side of plasma membrane,cell surface,membrane,integral component of membrane,B cell receptor complex,immunoglobulin complex, circulating,perinuclear region of cytoplasm,blood microparticle;	tr;tr;sp;sp	1;1;1;	1;2;2;	uniprot_mouse_proteome	>tr|A0A075B5P6|A0A075B5P6_MOUSE Ig mu chain C region (Fragment) OS=Mus musculus GN=Ighm PE=1 SV=1;>tr|A0A075B6A0|A0A075B6A0_MOUSE Ig mu chain C region (Fragment) OS=Mus musculus GN=Ighm PE=1 SV=2;>sp|P01872|IGHM_MOUSE Ig mu chain C region OS=Mus musculus GN=Ighm PE=1 SV=2;>sp|P01872-2|IGHM_MOUSE Isoform 2 of Ig mu chain C region OS=Mus musculus GN=Ighm	12	13
TRUE	Old_Native / Young_Native	Old_Native	Young_Native	170	A0A140T8I9;E9Q3L2	416412	621890	0.578646	0.578646	49.3447	1.49345	0	1.97691e-20	1.30709e-18	169	0.0551432	A0A140T8I9;E9Q3L2	A0A140T8I9_MOUSE;PI4KA_MOUSE	Phosphatidylinositol 4-kinase alpha	Pi4ka	A0A140T8I9;E9Q3L2	Mus musculus	;phosphorylation,actin cytoskeleton organization,viral RNA genome replication,multi-organism membrane organization,viral replication complex formation and maintenance,phosphatidylinositol phosphorylation,phosphatidylinositol-mediated signaling	;1-phosphatidylinositol 4-kinase activity,ATP binding,kinase activity,cadherin binding	;cytoplasm,plasma membrane,focal adhesion,membrane,viral replication complex,extracellular exosome	tr;sp	1	1;2	uniprot_mouse_proteome	>tr|A0A140T8I9|A0A140T8I9_MOUSE Phosphatidylinositol 4-kinase alpha OS=Mus musculus GN=Pi4ka PE=1 SV=1;>sp|E9Q3L2|PI4KA_MOUSE Phosphatidylinositol 4-kinase alpha OS=Mus musculus GN=Pi4ka PE=1 SV=2	32	34
TRUE	Old_Native / Young_Native	Old_Native	Young_Native	205	E9Q390;Q69ZN7	827857	1.00392e+06	0.278185	0.278185	21.2668	1.21267	0	2.37401e-20	1.52479e-18	204	0.0341262	E9Q390;Q69ZN7	E9Q390_MOUSE;MYOF_MOUSE	Myoferlin	Myof	E9Q390;Q69ZN7	Mus musculus	;plasma membrane repair,myoblast fusion,regulation of vascular endothelial growth factor receptor signaling pathway,cellular response to heat	;phospholipid binding	;plasma membrane,caveola,integral component of membrane,cytoplasmic vesicle membrane,cytoplasmic vesicle,nuclear membrane,intracellular membrane-bounded organelle,extracellular exosome	tr;sp	1	2	uniprot_mouse_proteome	>tr|E9Q390|E9Q390_MOUSE Myoferlin OS=Mus musculus GN=Myof PE=1 SV=2;>sp|Q69ZN7|MYOF_MOUSE Myoferlin OS=Mus musculus GN=Myof PE=1 SV=2	40	41
TRUE	Old_Native / Young_Native	Old_Native	Young_Native	95	Q8VDF2;Q8VDF2-2	527992	197109	-1.42152	1.42152	-62.6681	0.373319	0	4.40065e-20	2.74796e-18	94	0.21894	Q8VDF2;Q8VDF2-2	UHRF1_MOUSE	E3 ubiquitin-protein ligase UHRF1;Isoform 2 of E3 ubiquitin-protein ligase UHRF1	Uhrf1	Q8VDF2;Q8VDF2-2	Mus musculus	negative regulation of transcription from RNA polymerase II promoter,DNA repair,transcription, DNA-templated,cell cycle,cell proliferation,maintenance of DNA methylation,histone monoubiquitination,histone ubiquitination,positive regulation of cellular protein metabolic process,DNA methylation on cytosine,protein ubiquitination involved in ubiquitin-dependent protein catabolic process,protein auto…	core promoter proximal region sequence-specific DNA binding,ubiquitin-protein transferase activity,protein binding,zinc ion binding,methyl-CpG binding,nucleosomal histone binding,methylated histone binding,histone binding,identical protein binding,hemi-methylated DNA-binding,ubiquitin protein ligase activity;	nuclear chromatin,euchromatin,heterochromatin,nucleus,nucleoplasm,replication fork,nuclear heterochromatin,nuclear matrix;	sp	1;	2;	uniprot_mouse_proteome	>sp|Q8VDF2|UHRF1_MOUSE E3 ubiquitin-protein ligase UHRF1 OS=Mus musculus GN=Uhrf1 PE=1 SV=2;>sp|Q8VDF2-2|UHRF1_MOUSE Isoform 2 of E3 ubiquitin-protein ligase UHRF1 OS=Mus musculus GN=Uhrf1	18	19
TRUE	Old_Native / Young_Native	Old_Native	Young_Native	390	Q9JKF1	2.20497e+06	2.86587e+06	0.378217	0.378217	29.9734	1.29973	0	5.01251e-19	3.04544e-17	389	0.0378352	Q9JKF1	IQGA1_MOUSE	Ras GTPase-activating-like protein IQGAP1	Iqgap1	Q9JKF1	Mus musculus	regulation of cytokine production,epidermal growth factor receptor signaling pathway,fibroblast growth factor receptor signaling pathway,negative regulation of dephosphorylation,cellular response to platelet-derived growth factor stimulus,regulation of GTPase activity,positive regulation of MAP kinase activity,cellular response to fibroblast growth factor stimulus,positive regulation of protein k…	protein binding,calmodulin binding,phosphatidylinositol-3,4,5-trisphosphate binding,Rho GTPase binding,protein kinase binding,protein phosphatase binding,protein domain specific binding,protein complex binding,protein serine/threonine kinase activator activity,S100 protein binding,cadherin binding,Rac GTPase binding,mitogen-activated protein kinase binding	ruffle,nucleus,cytoplasm,microtubule,cell-cell junction,focal adhesion,membrane,lateral plasma membrane,axon,growth cone,midbody,intracellular ribonucleoprotein complex,extrinsic component of cytoplasmic side of plasma membrane,cell leading edge,slit diaphragm,cytoplasmic ribonucleoprotein granule,neuron projection,protein complex,membrane raft,extracellular exosome,actin cytoskeleton,microtubule…	sp	1	2	uniprot_mouse_proteome	>sp|Q9JKF1|IQGA1_MOUSE Ras GTPase-activating-like protein IQGAP1 OS=Mus musculus GN=Iqgap1 PE=1 SV=2	67	78
TRUE	Old_Native / Young_Native	Old_Native	Young_Native	85	Q52KC3	623811	309403	-1.01162	1.01162	-50.4012	0.495988	0	6.97149e-19	4.12419e-17	84	0.116023	Q52KC3	Q52KC3_MOUSE	DNA helicase	Mcm5	Q52KC3	Mus musculus				tr	1	1	uniprot_mouse_proteome	>tr|Q52KC3|Q52KC3_MOUSE DNA helicase OS=Mus musculus GN=Mcm5 PE=1 SV=1	17	17
TRUE	Old_Native / Young_Native	Old_Native	Young_Native	90	Q91WT7	2.8605e+06	1.77385e+06	-0.689388	0.689388	-37.9883	0.620117	0	7.42613e-19	4.2805e-17	89	0.0745208	Q91WT7	Q91WT7_MOUSE	3-alpha-hydroxysteroid dehydrogenase type 1	Akr1c14	Q91WT7	Mus musculus	hippocampus development,oxidation-reduction process	androsterone dehydrogenase activity	cellular_component	tr	1	1	uniprot_mouse_proteome	>tr|Q91WT7|Q91WT7_MOUSE 3-alpha-hydroxysteroid dehydrogenase type 1 OS=Mus musculus GN=Akr1c14 PE=1 SV=1	14	18
TRUE	Old_Native / Young_Native	Old_Native	Young_Native	130	P16125	16080511	9462072	-0.765085	0.765085	-41.1581	0.588419	0	8.51867e-19	4.78749e-17	129	0.0731625	P16125	LDHB_MOUSE	L-lactate dehydrogenase B chain	Ldhb	P16125	Mus musculus	carbohydrate metabolic process,lactate biosynthetic process from pyruvate,NAD metabolic process,oxidation-reduction process	L-lactate dehydrogenase activity,kinase binding,identical protein binding,NAD binding	mitochondrion,cytosol,membrane,myelin sheath,membrane raft,extracellular exosome	sp	1	2	uniprot_mouse_proteome	>sp|P16125|LDHB_MOUSE L-lactate dehydrogenase B chain OS=Mus musculus GN=Ldhb PE=1 SV=2	16	26
TRUE	Old_Native / Young_Native	Old_Native	Young_Native	160	P54869	11894789	8194887	-0.537534	0.537534	-31.1052	0.688948	0	1.03269e-18	5.63264e-17	159	0.0515191	P54869	HMCS2_MOUSE	Hydroxymethylglutaryl-CoA synthase, mitochondrial	Hmgcs2	P54869	Mus musculus	cholesterol biosynthetic process,isoprenoid biosynthetic process	hydroxymethylglutaryl-CoA synthase activity	mitochondrion,mitochondrial inner membrane	sp	1	2	uniprot_mouse_proteome	>sp|P54869|HMCS2_MOUSE Hydroxymethylglutaryl-CoA synthase, mitochondrial OS=Mus musculus GN=Hmgcs2 PE=1 SV=2	20	32
TRUE	Old_Native / Young_Native	Old_Native	Young_Native	65	P01863;P01865	677881	6.80818e+06	3.32817	3.32817	904.334	10.0433	0	1.05236e-18	5.63264e-17	64	0.249067	P01863;P01865	GCAA_MOUSE;GCAM_MOUSE	Ig gamma-2A chain C region, A allele;Ig gamma-2A chain C region, membrane-bound form	Ighg;Igh-1a	P01863;P01865	Mus musculus	phagocytosis, recognition,phagocytosis, engulfment,complement activation, classical pathway,defense response to bacterium,innate immune response,B cell receptor signaling pathway,positive regulation of B cell activation;antibody-dependent cellular cytotoxicity,positive regulation of type IIa hypersensitivity,positive regulation of type I hypersensitivity,humoral immune response mediated by circul…	antigen binding,immunoglobulin receptor binding;antigen binding,immunoglobulin receptor binding	external side of plasma membrane,immunoglobulin complex, circulating,blood microparticle;multivesicular body,cytosol,external side of plasma membrane,integral component of membrane,immunoglobulin complex, circulating,blood microparticle	sp	1	1;3	uniprot_mouse_proteome	>sp|P01863|GCAA_MOUSE Ig gamma-2A chain C region, A allele OS=Mus musculus GN=Ighg PE=1 SV=1;>sp|P01865|GCAM_MOUSE Ig gamma-2A chain C region, membrane-bound form OS=Mus musculus GN=Igh-1a PE=1 SV=3	7	13
TRUE	Old_Native / Young_Native	Old_Native	Young_Native	90	P25206	868109	533582	-0.702168	0.702168	-38.5352	0.614648	0	1.58024e-18	8.26135e-17	89	0.0986469	P25206	MCM3_MOUSE	DNA replication licensing factor MCM3	Mcm3	P25206	Mus musculus	DNA replication initiation,cell cycle	DNA binding,helicase activity,ATP binding	nuclear chromosome, telomeric region,nucleus,nucleoplasm,cytoplasm,centrosome,membrane,MCM complex,perinuclear region of cytoplasm	sp	1	2	uniprot_mouse_proteome	>sp|P25206|MCM3_MOUSE DNA replication licensing factor MCM3 OS=Mus musculus GN=Mcm3 PE=1 SV=2	17	18
TRUE	Old_Native / Young_Native	Old_Native	Young_Native	85	P97310	610938	294387	-1.05331	1.05331	-51.8139	0.481861	0	6.13393e-18	3.13388e-16	84	0.105072	P97310	MCM2_MOUSE	DNA replication licensing factor MCM2	Mcm2	P97310	Mus musculus	DNA unwinding involved in DNA replication,DNA replication initiation,nucleosome assembly,apoptotic process,cell cycle,cellular response to interleukin-4,cochlea development	DNA helicase activity,DNA replication origin binding,ATP binding,enzyme binding,histone binding,metal ion binding	nuclear chromosome, telomeric region,chromatin,nucleus,nucleoplasm,nuclear origin of replication recognition complex,cytoplasm,cytosol,microtubule cytoskeleton,MCM complex	sp	1	3	uniprot_mouse_proteome	>sp|P97310|MCM2_MOUSE DNA replication licensing factor MCM2 OS=Mus musculus GN=Mcm2 PE=1 SV=3	17	17
TRUE	Old_Native / Young_Native	Old_Native	Young_Native	140	Q8BMJ2	934758	832631	-0.166916	0.166916	-10.9255	0.890745	0	6.94593e-18	3.46988e-16	139	0.0311847	Q8BMJ2	SYLC_MOUSE	Leucine--tRNA ligase, cytoplasmic	Lars	Q8BMJ2	Mus musculus	glutaminyl-tRNA aminoacylation,leucyl-tRNA aminoacylation,valyl-tRNA aminoacylation,regulation of translational fidelity,protein targeting to lysosome,regulation of cell size,negative regulation of autophagy,cellular response to amino acid starvation,positive regulation of GTPase activity,cellular response to amino acid stimulus,cellular response to leucine,positive regulation of TORC1 signaling,…	aminoacyl-tRNA editing activity,glutamine-tRNA ligase activity,leucine-tRNA ligase activity,valine-tRNA ligase activity,GTPase activator activity,ATP binding	cytoplasm,lysosome,endoplasmic reticulum,endomembrane system,nuclear body,aminoacyl-tRNA synthetase multienzyme complex,cytosol	sp	1	2	uniprot_mouse_proteome	>sp|Q8BMJ2|SYLC_MOUSE Leucine--tRNA ligase, cytoplasmic OS=Mus musculus GN=Lars PE=1 SV=2	28	28
TRUE	Old_Native / Young_Native	Old_Native	Young_Native	110	Q9Z2D6-2	1.61143e+06	2.12313e+06	0.397852	0.397852	31.7545	1.31754	0	1.75045e-17	8.52216e-16	109	0.0466239	Q9Z2D6-2	MECP2_MOUSE	Isoform B of Methyl-CpG-binding protein 2	Mecp2	Q9Z2D6-2	Mus musculus				sp			uniprot_mouse_proteome	>sp|Q9Z2D6-2|MECP2_MOUSE Isoform B of Methyl-CpG-binding protein 2 OS=Mus musculus GN=Mecp2	18	22
TRUE	Old_Native / Young_Native	Old_Native	Young_Native	45	P01868;P01869	665350	2.28145e+06	1.77777	1.77777	242.895	3.42895	0	1.78177e-17	8.52216e-16	44	0.116938	P01868;P01869	IGHG1_MOUSE;IGH1M_MOUSE	Ig gamma-1 chain C region secreted form;Ig gamma-1 chain C region, membrane-bound form	Ighg1	P01868;P01869	Mus musculus	;antibody-dependent cellular cytotoxicity,positive regulation of type IIa hypersensitivity,positive regulation of type I hypersensitivity,humoral immune response mediated by circulating immunoglobulin,phagocytosis, recognition,phagocytosis, engulfment,complement activation, classical pathway,immunoglobulin mediated immune response,antibacterial humoral response,defense response to bacterium,innat…	;antigen binding,immunoglobulin receptor binding	;extracellular space,external side of plasma membrane,integral component of membrane,immunoglobulin complex, circulating,blood microparticle	sp	1	1;2	uniprot_mouse_proteome	>sp|P01868|IGHG1_MOUSE Ig gamma-1 chain C region secreted form OS=Mus musculus GN=Ighg1 PE=1 SV=1;>sp|P01869|IGH1M_MOUSE Ig gamma-1 chain C region, membrane-bound form OS=Mus musculus GN=Ighg1 PE=1 SV=2	7	9
TRUE	Old_Native / Young_Native	Old_Native	Young_Native	70	Q00519	435038	726905	0.740627	0.740627	67.0901	1.6709	0	1.90265e-17	8.91073e-16	69	0.072699	Q00519	XDH_MOUSE	Xanthine dehydrogenase/oxidase	Xdh	Q00519	Mus musculus	negative regulation of protein phosphorylation,negative regulation of endothelial cell proliferation,activation of cysteine-type endopeptidase activity involved in apoptotic process,lactation,xanthine catabolic process,negative regulation of gene expression,regulation of epithelial cell differentiation,negative regulation of endothelial cell differentiation,negative regulation of protein kinase B…	xanthine dehydrogenase activity,xanthine oxidase activity,iron ion binding,protein binding,electron carrier activity,oxidoreductase activity,oxidoreductase activity, acting on CH-OH group of donors,oxidoreductase activity, acting on the aldehyde or oxo group of donors,molybdenum ion binding,protein homodimerization activity,molybdopterin cofactor binding,flavin adenine dinucleotide binding,2 iron…	extracellular space,peroxisome,cytosol,sarcoplasmic reticulum	sp	1	5	uniprot_mouse_proteome	>sp|Q00519|XDH_MOUSE Xanthine dehydrogenase/oxidase OS=Mus musculus GN=Xdh PE=1 SV=5	14	14
TRUE	Old_Native / Young_Native	Old_Native	Young_Native	50	Q9R0P9	2.53457e+06	929026	-1.44795	1.44795	-63.3458	0.366542	0	2.14636e-17	9.84699e-16	49	0.12767	Q9R0P9	UCHL1_MOUSE	Ubiquitin carboxyl-terminal hydrolase isozyme L1	Uchl1	Q9R0P9	Mus musculus	response to ischemia,ubiquitin-dependent protein catabolic process,axonogenesis,axon target recognition,adult walking behavior,cell proliferation,protein deubiquitination,sensory perception of pain,axonal transport of mitochondrion,eating behavior,negative regulation of MAP kinase activity,muscle fiber development,neuromuscular process	cysteine-type endopeptidase activity,thiol-dependent ubiquitin-specific protease activity,omega peptidase activity,ligase activity,ubiquitin protein ligase binding,alpha-2A adrenergic receptor binding,ubiquitin binding	nucleoplasm,cytoplasm,endoplasmic reticulum membrane,cytosol,axon,neuronal cell body,myelin sheath,neuron projection terminus,extracellular exosome,axon cytoplasm,plasma membrane	sp	1	1	uniprot_mouse_proteome	>sp|Q9R0P9|UCHL1_MOUSE Ubiquitin carboxyl-terminal hydrolase isozyme L1 OS=Mus musculus GN=Uchl1 PE=1 SV=1	8	10
TRUE	Old_Native / Young_Native	Old_Native	Young_Native	60	Q9R112	547364	893368	0.706754	0.706754	63.2128	1.63213	0	3.09656e-17	1.39221e-15	59	0.0537641	Q9R112	SQRD_MOUSE	Sulfide:quinone oxidoreductase, mitochondrial	Sqrdl	Q9R112	Mus musculus	sulfide oxidation, using sulfide:quinone oxidoreductase,hydrogen sulfide metabolic process	quinone binding,sulfide:quinone oxidoreductase activity	mitochondrion,mitochondrial inner membrane	sp	1	3	uniprot_mouse_proteome	>sp|Q9R112|SQRD_MOUSE Sulfide:quinone oxidoreductase, mitochondrial OS=Mus musculus GN=Sqrdl PE=1 SV=3	11	12
TRUE	Old_Native / Young_Native	Old_Native	Young_Native	160	A0A171EBL2;E9Q555	358287	287066	-0.319736	0.319736	-19.8784	0.801216	0	3.24442e-17	1.43009e-15	159	0.040864	A0A171EBL2;E9Q555	A0A171EBL2_MOUSE;RN213_MOUSE	E3 ubiquitin-protein ligase RNF213	Rnf213	A0A171EBL2;E9Q555	Mus musculus	;angiogenesis,sprouting angiogenesis,ubiquitin-dependent protein catabolic process,protein ubiquitination,protein homooligomerization,protein autoubiquitination,negative regulation of non-canonical Wnt signaling pathway	;ubiquitin-protein transferase activity,ATPase activity,metal ion binding	;nucleolus,cytoplasm,cytosol,membrane	tr;sp	1	1;2	uniprot_mouse_proteome	>tr|A0A171EBL2|A0A171EBL2_MOUSE E3 ubiquitin-protein ligase RNF213 OS=Mus musculus GN=Rnf213 PE=1 SV=1;>sp|E9Q555|RN213_MOUSE E3 ubiquitin-protein ligase RNF213 OS=Mus musculus GN=Rnf213 PE=1 SV=2	31	32
TRUE	Old_Native / Young_Native	Old_Native	Young_Native	70	P16045	20716254	27587966	0.413276	0.413276	33.1706	1.33171	0	4.63891e-17	2.00544e-15	69	0.0340451	P16045	LEG1_MOUSE	Galectin-1	Lgals1	P16045	Mus musculus	plasma cell differentiation,receptor-mediated endocytosis,apoptotic process,heterophilic cell-cell adhesion via plasma membrane cell adhesion molecules,signal transduction,negative regulation of cell-substrate adhesion,negative regulation of neuron projection development,T cell costimulation,positive regulation of erythrocyte aggregation,response to isolation stress,response to drug,positive regu…	RNA binding,signal transducer activity,protein binding,galactose binding,carbohydrate binding,lactose binding,protein homodimerization activity,laminin binding	extracellular region,proteinaceous extracellular matrix,extracellular space,intracellular,nucleus,cytosol,cell surface,extracellular matrix,extracellular exosome	sp	1	3	uniprot_mouse_proteome	>sp|P16045|LEG1_MOUSE Galectin-1 OS=Mus musculus GN=Lgals1 PE=1 SV=3	7	14
TRUE	Old_Native / Young_Native	Old_Native	Young_Native	60	Q9CXS4	3.0091e+06	3.89714e+06	0.373083	0.373083	29.5118	1.29512	0	7.63082e-17	3.23662e-15	59	0.0319941	Q9CXS4	CENPV_MOUSE	Centromere protein V	Cenpv	Q9CXS4	Mus musculus	ameboidal-type cell migration,cell cycle,metabolic process,pericentric heterochromatin assembly,positive regulation of cytokinesis,regulation of chromosome organization,centromere complex assembly,cell division	molecular_function,carbon-sulfur lyase activity	kinetochore,condensed chromosome kinetochore,nucleus,nucleoplasm,cytosol,microtubule cytoskeleton,spindle midzone	sp	1	2	uniprot_mouse_proteome	>sp|Q9CXS4|CENPV_MOUSE Centromere protein V OS=Mus musculus GN=Cenpv PE=1 SV=2	10	12
TRUE	Old_Native / Young_Native	Old_Native	Young_Native	135	P97449	1.10461e+06	1.53563e+06	0.475292	0.475292	39.02	1.3902	0	1.1392e-16	4.74244e-15	134	0.0489453	P97449	AMPN_MOUSE	Aminopeptidase N	Anpep	P97449	Mus musculus	angiogenesis,proteolysis,signal transduction,cell-cell signaling,regulation of blood pressure,cell differentiation,peptide catabolic process	zinc ion binding,peptide binding,metalloaminopeptidase activity	extracellular space,nucleus,cytoplasm,lysosomal membrane,endoplasmic reticulum-Golgi intermediate compartment,plasma membrane,external side of plasma membrane,integral component of membrane,extracellular exosome	sp	1	4	uniprot_mouse_proteome	>sp|P97449|AMPN_MOUSE Aminopeptidase N OS=Mus musculus GN=Anpep PE=1 SV=4	23	27
TRUE	Old_Native / Young_Native	Old_Native	Young_Native	165	P30416	2649441	2105802	-0.331318	0.331318	-20.519	0.79481	0	1.22741e-16	5.01675e-15	164	0.0562819	P30416	FKBP4_MOUSE	Peptidyl-prolyl cis-trans isomerase FKBP4	Fkbp4	P30416	Mus musculus	protein peptidyl-prolyl isomerization,steroid hormone receptor complex assembly,copper ion transport,embryo implantation,negative regulation of neuron projection development,androgen receptor signaling pathway,prostate gland development,negative regulation of microtubule polymerization or depolymerization,negative regulation of microtubule polymerization,protein complex localization,male sex diff…	RNA binding,peptidyl-prolyl cis-trans isomerase activity,protein binding,ATP binding,GTP binding,FK506 binding,heat shock protein binding,copper-dependent protein binding,glucocorticoid receptor binding,tau protein binding,phosphoprotein binding	nucleus,nucleoplasm,cytoplasm,mitochondrion,cytosol,microtubule,neuronal cell body,protein complex,axonal growth cone,perinuclear region of cytoplasm,extracellular exosome	sp	1	5	uniprot_mouse_proteome	>sp|P30416|FKBP4_MOUSE Peptidyl-prolyl cis-trans isomerase FKBP4 OS=Mus musculus GN=Fkbp4 PE=1 SV=5	25	33
TRUE	Old_Native / Young_Native	Old_Native	Young_Native	155	Q99NB1	1.18968e+06	2.04707e+06	0.782982	0.782982	72.0684	1.72068	0	2.0767e-16	8.33647e-15	154	0.0937705	Q99NB1	ACS2L_MOUSE	Acetyl-coenzyme A synthetase 2-like, mitochondrial	Acss1	Q99NB1	Mus musculus	acetyl-CoA biosynthetic process,acetate biosynthetic process,acetyl-CoA biosynthetic process from acetate,propionate biosynthetic process	acetate-CoA ligase activity,ATP binding,AMP binding	mitochondrion,mitochondrial matrix	sp	1	1	uniprot_mouse_proteome	>sp|Q99NB1|ACS2L_MOUSE Acetyl-coenzyme A synthetase 2-like, mitochondrial OS=Mus musculus GN=Acss1 PE=1 SV=1	27	31
TRUE	Old_Native / Young_Native	Old_Native	Young_Native	125	P49312;Q5EBP8	12743700	10019306	-0.347002	0.347002	-21.3784	0.786216	0	3.21752e-16	1.26894e-14	124	0.0447719	P49312;Q5EBP8	ROA1_MOUSE;Q5EBP8_MOUSE	Heterogeneous nuclear ribonucleoprotein A1	Hnrnpa1	P49312;Q5EBP8	Mus musculus	alternative mRNA splicing, via spliceosome,RNA splicing,mRNA transport,nuclear export,nuclear import,cellular response to sodium arsenite;	single-stranded DNA binding,miRNA binding;	nucleus,nucleoplasm,spliceosomal complex,cytoplasm,intracellular ribonucleoprotein complex;	sp;tr	1	2;1	uniprot_mouse_proteome	>sp|P49312|ROA1_MOUSE Heterogeneous nuclear ribonucleoprotein A1 OS=Mus musculus GN=Hnrnpa1 PE=1 SV=2;>tr|Q5EBP8|Q5EBP8_MOUSE Heterogeneous nuclear ribonucleoprotein A1 OS=Mus musculus GN=Hnrnpa1 PE=1 SV=1	14	25
TRUE	Old_Native / Young_Native	Old_Native	Young_Native	60	Q61235	736211	1.00221e+06	0.444995	0.444995	36.131	1.36131	0	5.24343e-16	2.03228e-14	59	0.0454645	Q61235	SNTB2_MOUSE	Beta-2-syntrophin	Sntb2	Q61235	Mus musculus		RNA binding,actin binding,structural molecule activity,protein binding,calmodulin binding	cytoplasm,microtubule,focal adhesion,transport vesicle membrane,protein complex,synapse,extracellular exosome	sp	1	2	uniprot_mouse_proteome	>sp|Q61235|SNTB2_MOUSE Beta-2-syntrophin OS=Mus musculus GN=Sntb2 PE=1 SV=2	12	12
TRUE	Old_Native / Young_Native	Old_Native	Young_Native	100	P10605	7130472	10772891	0.595336	0.595336	51.0824	1.51082	0	5.8373e-16	2.22411e-14	99	0.0643637	P10605	CATB_MOUSE	Cathepsin B	Ctsb	P10605	Mus musculus	proteolysis,collagen catabolic process,epithelial cell differentiation,decidualization,viral entry into host cell,regulation of catalytic activity,proteolysis involved in cellular protein catabolic process,cellular response to thyroid hormone stimulus	cysteine-type endopeptidase activity,collagen binding,peptidase activity,cysteine-type peptidase activity,proteoglycan binding	extracellular space,nucleolus,mitochondrion,lysosome,melanosome,intracellular membrane-bounded organelle,perinuclear region of cytoplasm,extracellular exosome	sp	1	2	uniprot_mouse_proteome	>sp|P10605|CATB_MOUSE Cathepsin B OS=Mus musculus GN=Ctsb PE=1 SV=2	10	20
TRUE	Old_Native / Young_Native	Old_Native	Young_Native	140	P50580	2816247	2295048	-0.29525	0.29525	-18.5069	0.814931	0	6.01984e-16	2.25543e-14	139	0.053742	P50580	PA2G4_MOUSE	Proliferation-associated protein 2G4	Pa2g4	P50580	Mus musculus	transcription, DNA-templated,rRNA processing,regulation of translation,negative regulation of apoptotic process,positive regulation of cell differentiation,negative regulation of transcription, DNA-templated	DNA binding,transcription factor activity, sequence-specific DNA binding,RNA binding,ubiquitin protein ligase binding	nucleus,nucleolus,cytoplasm,membrane,intracellular ribonucleoprotein complex,extracellular exosome	sp	1	3	uniprot_mouse_proteome	>sp|P50580|PA2G4_MOUSE Proliferation-associated protein 2G4 OS=Mus musculus GN=Pa2g4 PE=1 SV=3	20	28
TRUE	Old_Native / Young_Native	Old_Native	Young_Native	75	Q9DBD0	381448	536825	0.492965	0.492965	40.7334	1.40733	0	8.49746e-16	3.13152e-14	74	0.0603675	Q9DBD0	ICA_MOUSE	Inhibitor of carbonic anhydrase	Ica	Q9DBD0	Mus musculus	negative regulation of catalytic activity	enzyme inhibitor activity,iron ion binding	cellular_component,extracellular space	sp	1	1	uniprot_mouse_proteome	>sp|Q9DBD0|ICA_MOUSE Inhibitor of carbonic anhydrase OS=Mus musculus GN=Ica PE=1 SV=1	15	15
TRUE	Old_Native / Young_Native	Old_Native	Young_Native	105	B1AU75;Q99MD9	894930	582750	-0.618898	0.618898	-34.8832	0.651168	0	1.01961e-15	3.69691e-14	104	0.0969014	B1AU75;Q99MD9	B1AU75_MOUSE;NASP_MOUSE	Nuclear autoantigenic sperm protein	Nasp	B1AU75;Q99MD9	Mus musculus	;blastocyst development,DNA replication,nucleosome assembly,DNA replication-dependent nucleosome assembly,DNA replication-independent nucleosome assembly,cell cycle,cell proliferation,protein transport,histone exchange	;protein binding,protein complex binding,histone binding,Hsp90 protein binding	;nuclear chromatin,nucleus,nucleoplasm,cytoplasm,protein complex	tr;sp	1	1;2	uniprot_mouse_proteome	>tr|B1AU75|B1AU75_MOUSE Nuclear autoantigenic sperm protein OS=Mus musculus GN=Nasp PE=1 SV=1;>sp|Q99MD9|NASP_MOUSE Nuclear autoantigenic sperm protein OS=Mus musculus GN=Nasp PE=1 SV=2	19	21
TRUE	Old_Native / Young_Native	Old_Native	Young_Native	25	D3YYR5;D3Z5U5;Q9Z256;Q9Z257	114423	200246	0.807395	0.807395	75.0049	1.75005	0	1.14083e-15	4.07078e-14	24	0.0433246	D3YYR5;D3Z5U5;Q9Z256;Q9Z257	D3YYR5_MOUSE;D3Z5U5_MOUSE;Q9Z256_MOUSE;Q9Z257_MOUSE	P2X purinoceptor 4;P2X purinoceptor;P2X purinoceptor;P2X purinoceptor	P2rx4	D3YYR5;D3Z5U5;Q9Z256;Q9Z257	Mus musculus	;;;	;;;	;;;	tr	1	2;2;1;1	uniprot_mouse_proteome	>tr|D3YYR5|D3YYR5_MOUSE P2X purinoceptor 4 OS=Mus musculus GN=P2rx4 PE=1 SV=2;>tr|D3Z5U5|D3Z5U5_MOUSE P2X purinoceptor OS=Mus musculus GN=P2rx4 PE=1 SV=2;>tr|Q9Z256|Q9Z256_MOUSE P2X purinoceptor OS=Mus musculus GN=P2rx4 PE=1 SV=1;>tr|Q9Z257|Q9Z257_MOUSE P2X purinoceptor OS=Mus musculus GN=P2rx4 PE=1 SV=1	5	5
TRUE	Old_Native / Young_Native	Old_Native	Young_Native	100	P97311;Q3ULG5	588817	336632	-0.806645	0.806645	-42.829	0.57171	0	4.81303e-15	1.69058e-13	99	0.129854	P97311;Q3ULG5	MCM6_MOUSE;Q3ULG5_MOUSE	DNA replication licensing factor MCM6;DNA helicase	Mcm6	P97311;Q3ULG5	Mus musculus	DNA unwinding involved in DNA replication,DNA replication initiation,cell cycle;	single-stranded DNA binding,protein binding,ATP binding,identical protein binding,DNA helicase activity,ATP-dependent DNA helicase activity;	nuclear chromosome, telomeric region,nucleus,nucleoplasm,MCM complex;	sp;tr	1	1	uniprot_mouse_proteome	>sp|P97311|MCM6_MOUSE DNA replication licensing factor MCM6 OS=Mus musculus GN=Mcm6 PE=1 SV=1;>tr|Q3ULG5|Q3ULG5_MOUSE DNA helicase OS=Mus musculus GN=Mcm6 PE=1 SV=1	19	20
TRUE	Old_Native / Young_Native	Old_Native	Young_Native	155	P19324	11428120	9151760	-0.320467	0.320467	-19.9189	0.800811	0	1.10884e-14	3.83488e-13	154	0.0433858	P19324	SERPH_MOUSE	Serpin H1	Serpinh1	P19324	Mus musculus	chondrocyte development involved in endochondral bone morphogenesis,negative regulation of endopeptidase activity,collagen fibril organization,collagen biosynthetic process,protein maturation	RNA binding,serine-type endopeptidase inhibitor activity,protein binding,collagen binding,unfolded protein binding	cytoplasm,endoplasmic reticulum,endoplasmic reticulum lumen,endoplasmic reticulum-Golgi intermediate compartment,membrane raft,extracellular exosome,extracellular space	sp	1	3	uniprot_mouse_proteome	>sp|P19324|SERPH_MOUSE Serpin H1 OS=Mus musculus GN=Serpinh1 PE=1 SV=3	20	31
TRUE	Old_Native / Young_Native	Old_Native	Young_Native	140	Q9CPX4	42569136	80224152	0.914229	0.914229	88.4561	1.88456	0	1.4543e-14	4.8795e-13	139	0.111673	Q9CPX4	Q9CPX4_MOUSE	Ferritin	Ftl1-ps1	Q9CPX4	Mus musculus				tr	1	1	uniprot_mouse_proteome	>tr|Q9CPX4|Q9CPX4_MOUSE Ferritin OS=Mus musculus GN=Ftl1-ps1 PE=1 SV=1	13	28
TRUE	Old_Native / Young_Native	Old_Native	Young_Native	65	O35969;O35969-2	1.58538e+06	2.28715e+06	0.528719	0.528719	44.2648	1.44265	0	1.44582e-14	4.8795e-13	64	0.0518978	O35969;O35969-2	GAMT_MOUSE	Guanidinoacetate N-methyltransferase;Isoform 2 of Guanidinoacetate N-methyltransferase	Gamt	O35969;O35969-2	Mus musculus	creatine biosynthetic process,spermatogenesis,animal organ morphogenesis,methylation,regulation of multicellular organism growth,S-adenosylhomocysteine metabolic process,S-adenosylmethionine metabolic process;	guanidinoacetate N-methyltransferase activity;	nucleus,cytoplasm,microvillus,extracellular exosome;	sp	1;	1;	uniprot_mouse_proteome	>sp|O35969|GAMT_MOUSE Guanidinoacetate N-methyltransferase OS=Mus musculus GN=Gamt PE=1 SV=1;>sp|O35969-2|GAMT_MOUSE Isoform 2 of Guanidinoacetate N-methyltransferase OS=Mus musculus GN=Gamt	9	13
TRUE	Old_Native / Young_Native	Old_Native	Young_Native	110	Q8BPB5	890477	2.01723e+06	1.17972	1.17972	126.533	2.26533	0	1.83139e-14	6.05435e-13	109	0.126301	Q8BPB5	FBLN3_MOUSE	EGF-containing fibulin-like extracellular matrix protein 1	Efemp1	Q8BPB5	Mus musculus	regulation of transcription, DNA-templated,epidermal growth factor receptor signaling pathway,regulation of receptor activity,peptidyl-tyrosine phosphorylation,negative regulation of chondrocyte differentiation,camera-type eye development,embryonic eye morphogenesis,post-embryonic eye morphogenesis	epidermal growth factor-activated receptor activity,epidermal growth factor receptor binding,calcium ion binding,growth factor activity	proteinaceous extracellular matrix,extracellular space,extracellular exosome,extracellular matrix	sp	1	1	uniprot_mouse_proteome	>sp|Q8BPB5|FBLN3_MOUSE EGF-containing fibulin-like extracellular matrix protein 1 OS=Mus musculus GN=Efemp1 PE=1 SV=1	17	22
TRUE	Old_Native / Young_Native	Old_Native	Young_Native	50	A0A075B5P5;P03987;P03987-2	890312	2252231	1.33897	1.33897	152.971	2.52971	0	2.03585e-14	6.63274e-13	49	0.118763	A0A075B5P5;P03987;P03987-2	A0A075B5P5_MOUSE;IGHG3_MOUSE;IGHG3_MOUSE	Protein Ighg3 (Fragment);Ig gamma-3 chain C region;Isoform 2 of Ig gamma-3 chain C region	Ighg3;;	A0A075B5P5;P03987;P03987-2	Mus musculus	;;	;antigen binding,immunoglobulin receptor binding;	;extracellular region,plasma membrane,integral component of membrane;	tr;sp;sp	4;1;	1;2;	uniprot_mouse_proteome	>tr|A0A075B5P5|A0A075B5P5_MOUSE Protein Ighg3 (Fragment) OS=Mus musculus GN=Ighg3 PE=4 SV=1;>sp|P03987|IGHG3_MOUSE Ig gamma-3 chain C region OS=Mus musculus PE=1 SV=2;>sp|P03987-2|IGHG3_MOUSE Isoform 2 of Ig gamma-3 chain C region OS=Mus musculus	8	10
TRUE	Old_Native / Young_Native	Old_Native	Young_Native	85	P51885	4585680	7369347	0.684401	0.684401	60.7035	1.60703	0	2.46154e-14	7.90505e-13	84	0.073656	P51885	LUM_MOUSE	Lumican	Lum	P51885	Mus musculus	visual perception,response to organic cyclic compound,collagen fibril organization,positive regulation of transforming growth factor beta1 production,positive regulation of transcription from RNA polymerase II promoter,cartilage development,response to growth factor,axonogenesis	collagen binding	proteinaceous extracellular matrix,fibrillar collagen trimer,extracellular space,extracellular matrix,extracellular exosome	sp	1	2	uniprot_mouse_proteome	>sp|P51885|LUM_MOUSE Lumican OS=Mus musculus GN=Lum PE=1 SV=2	12	17
TRUE	Old_Native / Young_Native	Old_Native	Young_Native	60	Q91Z25;Q9WV32	1.55649e+06	1829302	0.232993	0.232993	17.527	1.17527	0	2.65254e-14	8.39848e-13	59	0.0321171	Q91Z25;Q9WV32	Q91Z25_MOUSE;ARC1B_MOUSE	Actin-related protein 2/3 complex subunit 1B	Arpc1b	Q91Z25;Q9WV32	Mus musculus	;response to estradiol,Arp2/3 complex-mediated actin nucleation,response to estrogen	;structural constituent of cytoskeleton,actin filament binding	;cytoplasm,Arp2/3 protein complex,focal adhesion,tubulobulbar complex,extracellular exosome	tr;sp	1	1;4	uniprot_mouse_proteome	>tr|Q91Z25|Q91Z25_MOUSE Actin-related protein 2/3 complex subunit 1B OS=Mus musculus GN=Arpc1b PE=1 SV=1;>sp|Q9WV32|ARC1B_MOUSE Actin-related protein 2/3 complex subunit 1B OS=Mus musculus GN=Arpc1b PE=1 SV=4	10	12
TRUE	Old_Native / Young_Native	Old_Native	Young_Native	150	E9Q8I0;P06909	1.06525e+06	1.34806e+06	0.339703	0.339703	26.5496	1.2655	0	2.91036e-14	9.0868e-13	149	0.0389106	E9Q8I0;P06909	E9Q8I0_MOUSE;CFAH_MOUSE	Complement factor H	Cfh	E9Q8I0;P06909	Mus musculus	;complement activation,complement activation, alternative pathway,regulation of complement activation,positive regulation of cytolysis	;complement component C3b binding,protein binding,heparin binding,heparan sulfate proteoglycan binding	;extracellular space,extracellular exosome,blood microparticle	tr;sp	1	1;2	uniprot_mouse_proteome	>tr|E9Q8I0|E9Q8I0_MOUSE Complement factor H OS=Mus musculus GN=Cfh PE=1 SV=1;>sp|P06909|CFAH_MOUSE Complement factor H OS=Mus musculus GN=Cfh PE=1 SV=2	27	30
TRUE	Old_Native / Young_Native	Old_Native	Young_Native	190	Q62318	8562796	7237986	-0.242494	0.242494	-15.4717	0.845283	0	3.97792e-14	1.22498e-12	189	0.0375744	Q62318	TIF1B_MOUSE	Transcription intermediary factor 1-beta	Trim28	Q62318	Mus musculus	negative regulation of transcription from RNA polymerase II promoter,in utero embryonic development,epithelial to mesenchymal transition,DNA repair,transcription, DNA-templated,protein phosphorylation,Ras protein signal transduction,embryo implantation,protein ubiquitination,chromatin modification,protein sumoylation,positive regulation of transcription factor import into nucleus,DNA methylation …	RNA polymerase II transcription coactivator activity,DNA binding,chromatin binding,transcription coactivator activity,transcription corepressor activity,RNA binding,protein kinase activity,ubiquitin-protein transferase activity,protein binding,zinc ion binding,ubiquitin protein ligase binding,Krueppel-associated box domain binding,chromo shadow domain binding,promoter-specific chromatin binding,t…	chromatin,nucleus,nucleoplasm,nuclear euchromatin,nuclear heterochromatin,RNA polymerase II transcription factor complex,nucleolus	sp	1	3	uniprot_mouse_proteome	>sp|Q62318|TIF1B_MOUSE Transcription intermediary factor 1-beta OS=Mus musculus GN=Trim28 PE=1 SV=3	28	38
TRUE	Old_Native / Young_Native	Old_Native	Young_Native	365	A0A087WR50;Q3UHL6	3.67523e+06	4.26808e+06	0.215753	0.215753	16.131	1.16131	0	4.21727e-14	1.28114e-12	364	0.0246174	A0A087WR50;Q3UHL6	A0A087WR50_MOUSE;Q3UHL6_MOUSE	Fibronectin	Fn1	A0A087WR50;Q3UHL6	Mus musculus	;	;	;	tr	1	1	uniprot_mouse_proteome	>tr|A0A087WR50|A0A087WR50_MOUSE Fibronectin OS=Mus musculus GN=Fn1 PE=1 SV=1;>tr|Q3UHL6|Q3UHL6_MOUSE Fibronectin OS=Mus musculus GN=Fn1 PE=1 SV=1	57	73
TRUE	Old_Native / Young_Native	Old_Native	Young_Native	145	P07901	8977616	7.12547e+06	-0.333347	0.333347	-20.6307	0.793693	0	6.28579e-14	1.88406e-12	144	0.0518055	P07901	HS90A_MOUSE	Heat shock protein HSP 90-alpha	Hsp90aa1	P07901	Mus musculus	nitric oxide biosynthetic process,response to unfolded protein,telomere maintenance via telomerase,response to heat,response to cold,peptidyl-tyrosine phosphorylation,regulation of protein ubiquitination,protein refolding,protein import into mitochondrial outer membrane,positive regulation of nitric oxide biosynthetic process,positive regulation of cytotoxic T cell differentiation,response to ant…	RNA binding,protein tyrosine kinase activity,protein binding,ATP binding,ATPase activity,MHC class II protein complex binding,nitric-oxide synthase regulator activity,TPR domain binding,identical protein binding,protein homodimerization activity,histone deacetylase binding,GTPase binding,unfolded protein binding,DNA polymerase binding,disordered domain specific binding,protein tyrosine kinase bin…	intracellular,nucleus,cytoplasm,cytosol,membrane,ruffle membrane,melanosome,myelin sheath,protein complex,extracellular exosome	sp	1	4	uniprot_mouse_proteome	>sp|P07901|HS90A_MOUSE Heat shock protein HSP 90-alpha OS=Mus musculus GN=Hsp90aa1 PE=1 SV=4	19	29
TRUE	Old_Native / Young_Native	Old_Native	Young_Native	345	E9QPD7;G5E8R3;Q05920	11408894	15604499	0.451803	0.451803	36.7749	1.36775	0	6.51549e-14	1.92721e-12	344	0.0601699	E9QPD7;G5E8R3;Q05920	E9QPD7_MOUSE;G5E8R3_MOUSE;PYC_MOUSE	Pyruvate carboxylase;Pyruvate carboxylase;Pyruvate carboxylase, mitochondrial	Pcx;Pcx;Pc	E9QPD7;G5E8R3;Q05920	Mus musculus	;;pyruvate metabolic process,gluconeogenesis,lipid metabolic process,negative regulation of gene expression,viral RNA genome packaging,positive regulation by host of viral release from host cell,positive regulation by host of viral process	;;biotin carboxylase activity,pyruvate carboxylase activity,ATP binding,biotin binding,metal ion binding	;;cytoplasm,mitochondrion,mitochondrial inner membrane,mitochondrial matrix	tr;tr;sp	1	1	uniprot_mouse_proteome	>tr|E9QPD7|E9QPD7_MOUSE Pyruvate carboxylase OS=Mus musculus GN=Pcx PE=1 SV=1;>tr|G5E8R3|G5E8R3_MOUSE Pyruvate carboxylase OS=Mus musculus GN=Pcx PE=1 SV=1;>sp|Q05920|PYC_MOUSE Pyruvate carboxylase, mitochondrial OS=Mus musculus GN=Pc PE=1 SV=1	50	69
TRUE	Old_Native / Young_Native	Old_Native	Young_Native	60	Q80ZX8;Q80ZX8-2;Q80ZX8-3	178679	438144	1.29404	1.29404	145.214	2.45214	0	7.54037e-14	2.2014e-12	59	0.145512	Q80ZX8;Q80ZX8-2;Q80ZX8-3	SPAG1_MOUSE	Sperm-associated antigen 1;Isoform 2 of Sperm-associated antigen 1;Isoform 3 of Sperm-associated antigen 1	Spag1	Q80ZX8;Q80ZX8-2;Q80ZX8-3	Mus musculus	single fertilization,axonemal dynein complex assembly;;	GTP binding,hydrolase activity;;	cytoplasm,cytosol;;	sp	1;;	1;;	uniprot_mouse_proteome	>sp|Q80ZX8|SPAG1_MOUSE Sperm-associated antigen 1 OS=Mus musculus GN=Spag1 PE=1 SV=1;>sp|Q80ZX8-2|SPAG1_MOUSE Isoform 2 of Sperm-associated antigen 1 OS=Mus musculus GN=Spag1;>sp|Q80ZX8-3|SPAG1_MOUSE Isoform 3 of Sperm-associated antigen 1 OS=Mus musculus GN=Spag1	9	12
TRUE	Old_Native / Young_Native	Old_Native	Young_Native	65	E9PYH0;G3XA35	982571	696685	-0.496054	0.496054	-29.0957	0.709043	0	1.03988e-13	2.99698e-12	64	0.0949667	E9PYH0;G3XA35	E9PYH0_MOUSE;G3XA35_MOUSE	Versican core protein;MCG116562, isoform CRA_a	Vcan	E9PYH0;G3XA35	Mus musculus	;	;	;	tr	1	1	uniprot_mouse_proteome	>tr|E9PYH0|E9PYH0_MOUSE Versican core protein OS=Mus musculus GN=Vcan PE=1 SV=1;>tr|G3XA35|G3XA35_MOUSE MCG116562, isoform CRA_a OS=Mus musculus GN=Vcan PE=1 SV=1	13	13
TRUE	Old_Native / Young_Native	Old_Native	Young_Native	200	P80314	4.31379e+06	3.54788e+06	-0.281998	0.281998	-17.7549	0.822451	0	1.08869e-13	3.09794e-12	199	0.0456388	P80314	TCPB_MOUSE	T-complex protein 1 subunit beta	Cct2	P80314	Mus musculus	'de novo' protein folding,binding of sperm to zona pellucida,positive regulation of telomere maintenance via telomerase,protein stabilization,chaperone mediated protein folding independent of cofactor,chaperone-mediated protein complex assembly,positive regulation of telomerase activity,chaperone-mediated protein folding,scaRNA localization to Cajal body,toxin transport,positive regulation of est…	ATP binding,ubiquitin protein ligase binding,protein binding involved in protein folding,unfolded protein binding	zona pellucida receptor complex,cytosol,chaperonin-containing T-complex,microtubule,extracellular matrix,myelin sheath,cell body,extracellular exosome	sp	1	4	uniprot_mouse_proteome	>sp|P80314|TCPB_MOUSE T-complex protein 1 subunit beta OS=Mus musculus GN=Cct2 PE=1 SV=4	28	40
TRUE	Old_Native / Young_Native	Old_Native	Young_Native	75	P23953	5.70917e+06	7898651	0.468326	0.468326	38.3503	1.3835	0	1.1605e-13	3.26099e-12	74	0.0628372	P23953	EST1C_MOUSE	Carboxylesterase 1C	Ces1c	P23953	Mus musculus		hydrolase activity, acting on ester bonds,carboxylic ester hydrolase activity	extracellular space,endoplasmic reticulum lumen	sp	1	4	uniprot_mouse_proteome	>sp|P23953|EST1C_MOUSE Carboxylesterase 1C OS=Mus musculus GN=Ces1c PE=1 SV=4	11	15
TRUE	Old_Native / Young_Native	Old_Native	Young_Native	75	Q9CWU5-2	837378	184764	-2.1802	2.1802	-77.9354	0.220646	0	1.26011e-13	3.4972e-12	74	0.279671	Q9CWU5-2	KHDC3_MOUSE	Isoform 2 of KH domain-containing protein 3	Khdc3	Q9CWU5-2	Mus musculus				sp			uniprot_mouse_proteome	>sp|Q9CWU5-2|KHDC3_MOUSE Isoform 2 of KH domain-containing protein 3 OS=Mus musculus GN=Khdc3	14	15
TRUE	Old_Native / Young_Native	Old_Native	Young_Native	110	P62908	16774926	14520486	-0.208217	0.208217	-13.4393	0.865607	0	1.39132e-13	3.81424e-12	109	0.034859	P62908	RS3_MOUSE	40S ribosomal protein S3	Rps3	P62908	Mus musculus	cytoplasmic translation,DNA repair,transcription, DNA-templated,apoptotic process,response to oxidative stress,chromosome segregation,positive regulation of gene expression,negative regulation of translation,positive regulation of microtubule polymerization,positive regulation of protein complex assembly,negative regulation of protein ubiquitination,positive regulation of endodeoxyribonuclease ac…	DNA binding,damaged DNA binding,RNA binding,mRNA binding,structural constituent of ribosome,DNA-(apurinic or apyrimidinic site) lyase activity,endodeoxyribonuclease activity,protein binding,microtubule binding,transcription factor binding,oxidized purine nucleobase lesion DNA N-glycosylase activity,tubulin binding,enzyme binding,kinase binding,protein kinase binding,Hsp70 protein binding,oxidized…	nucleus,nucleolus,cytoplasm,mitochondrial inner membrane,mitochondrial matrix,endoplasmic reticulum,cytosol,ribosome,polysome,plasma membrane,focal adhesion,membrane,cytosolic small ribosomal subunit,intracellular ribonucleoprotein complex,extracellular matrix,ruffle membrane,extracellular exosome,NF-kappaB complex,mitotic spindle	sp	1	1	uniprot_mouse_proteome	>sp|P62908|RS3_MOUSE 40S ribosomal protein S3 OS=Mus musculus GN=Rps3 PE=1 SV=1	18	22
TRUE	Old_Native / Young_Native	Old_Native	Young_Native	170	P42932	5.16122e+06	4.42263e+06	-0.222807	0.222807	-14.3104	0.856896	0	1.77514e-13	4.80785e-12	169	0.0349999	P42932	TCPQ_MOUSE	T-complex protein 1 subunit theta	Cct8	P42932	Mus musculus	'de novo' protein folding,binding of sperm to zona pellucida,positive regulation of telomere maintenance via telomerase,pore complex assembly,protein stabilization,chaperone-mediated protein folding,toxin transport,positive regulation of establishment of protein localization to telomere,positive regulation of protein localization to Cajal body,positive regulation of telomerase RNA localization to…	protein binding,ATP binding,protein binding involved in protein folding,cadherin binding,unfolded protein binding	zona pellucida receptor complex,nucleoplasm,cytoplasm,centrosome,cytosol,chaperonin-containing T-complex,microtubule,cilium,cell body,intermediate filament cytoskeleton,extracellular exosome	sp	1	3	uniprot_mouse_proteome	>sp|P42932|TCPQ_MOUSE T-complex protein 1 subunit theta OS=Mus musculus GN=Cct8 PE=1 SV=3	27	34
TRUE	Old_Native / Young_Native	Old_Native	Young_Native	160	P80316	3.14565e+06	2.63347e+06	-0.256394	0.256394	-16.2822	0.837178	0	1.82239e-13	4.87706e-12	159	0.0349667	P80316	TCPE_MOUSE	T-complex protein 1 subunit epsilon	Cct5	P80316	Mus musculus	'de novo' protein folding,binding of sperm to zona pellucida,response to virus,positive regulation of telomere maintenance via telomerase,protein stabilization,chaperone-mediated protein folding,toxin transport,positive regulation of establishment of protein localization to telomere,positive regulation of protein localization to Cajal body,positive regulation of telomerase RNA localization to Caj…	mRNA 3'-UTR binding,protein binding,ATP binding,G-protein beta-subunit binding,protein binding involved in protein folding,mRNA 5'-UTR binding,beta-tubulin binding,unfolded protein binding	zona pellucida receptor complex,nucleolus,centrosome,cytosol,chaperonin-containing T-complex,microtubule,myelin sheath,cell body,extracellular exosome	sp	1	1	uniprot_mouse_proteome	>sp|P80316|TCPE_MOUSE T-complex protein 1 subunit epsilon OS=Mus musculus GN=Cct5 PE=1 SV=1	25	32
TRUE	Old_Native / Young_Native	Old_Native	Young_Native	110	Q9CZN7	1.59613e+06	1.23608e+06	-0.368815	0.368815	-22.5582	0.774418	0	2.22486e-13	5.88409e-12	109	0.0582504	Q9CZN7	Q9CZN7_MOUSE	Serine hydroxymethyltransferase	Shmt2	Q9CZN7	Mus musculus	glycine metabolic process,L-serine metabolic process,L-serine biosynthetic process,one-carbon metabolic process,positive regulation of cell proliferation,glycine biosynthetic process from serine,response to type I interferon,tetrahydrofolate interconversion,tetrahydrofolate metabolic process,protein tetramerization,protein homotetramerization,protein K63-linked deubiquitination	chromatin binding,glycine hydroxymethyltransferase activity,L-allo-threonine aldolase activity,amino acid binding,pyridoxal phosphate binding,identical protein binding	nucleus,cytoplasm,mitochondrion,mitochondrial inner membrane,mitochondrial intermembrane space,mitochondrial matrix,microtubule cytoskeleton,mitochondrial nucleoid,extracellular exosome,BRISC complex	tr	1	1	uniprot_mouse_proteome	>tr|Q9CZN7|Q9CZN7_MOUSE Serine hydroxymethyltransferase OS=Mus musculus GN=Shmt2 PE=1 SV=1	19	22
TRUE	Old_Native / Young_Native	Old_Native	Young_Native	135	A0A0G2JGX4;Q6PIC6;Q8VCE0	4.41599e+06	5087821	0.20431	0.20431	15.2135	1.15214	0	2.80253e-13	7.32569e-12	134	0.0517891	A0A0G2JGX4;Q6PIC6;Q8VCE0	A0A0G2JGX4_MOUSE;AT1A3_MOUSE;Q8VCE0_MOUSE	Sodium/potassium-transporting ATPase subunit alpha;Sodium/potassium-transporting ATPase subunit alpha-3;Sodium/potassium-transporting ATPase subunit alpha	Atp1a3	A0A0G2JGX4;Q6PIC6;Q8VCE0	Mus musculus	;cellular sodium ion homeostasis,memory,adult locomotory behavior,visual learning,potassium ion import,establishment or maintenance of transmembrane electrochemical gradient,cerebral cortex development,cellular potassium ion homeostasis,ionotropic glutamate receptor signaling pathway,sodium ion export from cell,response to drug,cardiac muscle contraction,cellular response to retinoic acid,regulat…	;beta-amyloid binding,sodium:potassium-exchanging ATPase activity,ATP binding,D1 dopamine receptor binding,heparan sulfate proteoglycan binding,metal ion binding,chaperone binding,sodium:potassium-exchanging ATPase activity involved in regulation of cardiac muscle cell membrane potential;	;nucleus,cytoplasm,endoplasmic reticulum,Golgi apparatus,plasma membrane,sodium:potassium-exchanging ATPase complex,axon,sarcolemma,neuronal cell body,myelin sheath,dendritic spine neck,dendritic spine head,synapse,extracellular vesicle;	tr;sp;tr	1	1	uniprot_mouse_proteome	>tr|A0A0G2JGX4|A0A0G2JGX4_MOUSE Sodium/potassium-transporting ATPase subunit alpha OS=Mus musculus GN=Atp1a3 PE=1 SV=1;>sp|Q6PIC6|AT1A3_MOUSE Sodium/potassium-transporting ATPase subunit alpha-3 OS=Mus musculus GN=Atp1a3 PE=1 SV=1;>tr|Q8VCE0|Q8VCE0_MOUSE Sodium/potassium-transporting ATPase subunit alpha OS=Mus musculus GN=Atp1a3 PE=1 SV=1	21	27
TRUE	Old_Native / Young_Native	Old_Native	Young_Native	70	D3YYU8	379376	231064	-0.715339	0.715339	-39.0938	0.609062	0	4.5531e-13	1.16311e-11	69	0.108419	D3YYU8	OBSL1_MOUSE	Obscurin-like protein 1	Obsl1	D3YYU8	Mus musculus	microtubule cytoskeleton organization,striated muscle contraction,actin filament organization,Golgi organization,regulation of mitotic nuclear division,protein localization to Golgi apparatus,sarcomere organization,positive regulation of dendrite morphogenesis,striated muscle myosin thick filament assembly	structural constituent of muscle,actin filament binding,muscle alpha-actinin binding,structural molecule activity conferring elasticity	cytoplasm,Golgi apparatus,centrosome,muscle myosin complex,Z disc,M band,perinuclear region of cytoplasm,3M complex	sp	1	1	uniprot_mouse_proteome	>sp|D3YYU8|OBSL1_MOUSE Obscurin-like protein 1 OS=Mus musculus GN=Obsl1 PE=1 SV=1	14	14
TRUE	Old_Native / Young_Native	Old_Native	Young_Native	50	P07742	334380	224565	-0.574357	0.574357	-32.8414	0.671586	0	4.52994e-13	1.16311e-11	49	0.0658235	P07742	RIR1_MOUSE	Ribonucleoside-diphosphate reductase large subunit	Rrm1	P07742	Mus musculus	mitotic cell cycle,pyrimidine nucleobase metabolic process,DNA replication,male gonad development,deoxyribonucleotide biosynthetic process,response to ionizing radiation,cell proliferation in forebrain,protein oligomerization,protein heterotetramerization,oxidation-reduction process,retina development in camera-type eye	ribonucleoside-diphosphate reductase activity, thioredoxin disulfide as acceptor,protein binding,ATP binding,purine nucleotide binding,disordered domain specific binding	nuclear envelope,cytosol,ribonucleoside-diphosphate reductase complex,cell projection,neuronal cell body,extracellular exosome	sp	1	2	uniprot_mouse_proteome	>sp|P07742|RIR1_MOUSE Ribonucleoside-diphosphate reductase large subunit OS=Mus musculus GN=Rrm1 PE=1 SV=2	10	10
TRUE	Old_Native / Young_Native	Old_Native	Young_Native	170	Q9WTI7;Q9WTI7-2;Q9WTI7-3	1.53215e+06	1.94852e+06	0.346818	0.346818	27.1753	1.27175	0	6.69876e-13	1.692e-11	169	0.0335616	Q9WTI7;Q9WTI7-2;Q9WTI7-3	MYO1C_MOUSE	Unconventional myosin-Ic;Isoform 2 of Unconventional myosin-Ic;Isoform 3 of Unconventional myosin-Ic	Myo1c	Q9WTI7;Q9WTI7-2;Q9WTI7-3	Mus musculus	protein targeting,protein targeting to membrane,transport,positive regulation of cell migration,positive regulation of actin filament polymerization,positive regulation of cell migration by vascular endothelial growth factor signaling pathway,mRNA transport,membrane organization,positive regulation of protein targeting to membrane,positive regulation of cellular response to insulin stimulus,posit…	microfilament motor activity,actin binding,receptor binding,protein binding,calmodulin binding,ATP binding,phospholipid binding,protein C-terminus binding,Ral GTPase binding,actin-dependent ATPase activity,actin filament binding;;	nuclear pore,nucleolus,cytoplasm,cytosol,plasma membrane,microvillus,brush border,basal plasma membrane,membrane,lateral plasma membrane,nuclear body,cytoplasmic vesicle,filamentous actin,stereocilium,ruffle membrane,membrane raft,myosin I complex,stereocilium membrane,extracellular exosome;;	sp	1;;	2;;	uniprot_mouse_proteome	>sp|Q9WTI7|MYO1C_MOUSE Unconventional myosin-Ic OS=Mus musculus GN=Myo1c PE=1 SV=2;>sp|Q9WTI7-2|MYO1C_MOUSE Isoform 2 of Unconventional myosin-Ic OS=Mus musculus GN=Myo1c;>sp|Q9WTI7-3|MYO1C_MOUSE Isoform 3 of Unconventional myosin-Ic OS=Mus musculus GN=Myo1c	32	34
TRUE	Old_Native / Young_Native	Old_Native	Young_Native	190	P21619	3.99587e+06	4701451	0.234595	0.234595	17.6577	1.17658	0	7.43862e-13	1.858e-11	189	0.0450444	P21619	LMNB2_MOUSE	Lamin-B2	Lmnb2	P21619	Mus musculus		structural molecule activity	nucleus,nuclear envelope,nuclear inner membrane,lamin filament	sp	1	2	uniprot_mouse_proteome	>sp|P21619|LMNB2_MOUSE Lamin-B2 OS=Mus musculus GN=Lmnb2 PE=1 SV=2	31	38
TRUE	Old_Native / Young_Native	Old_Native	Young_Native	105	Q9EPL9	761877	1.0726e+06	0.49348	0.49348	40.7836	1.40784	0	1.10142e-12	2.72086e-11	104	0.0667896	Q9EPL9	ACOX3_MOUSE	Peroxisomal acyl-coenzyme A oxidase 3	Acox3	Q9EPL9	Mus musculus	fatty acid beta-oxidation,fatty acid beta-oxidation using acyl-CoA dehydrogenase,fatty acid beta-oxidation using acyl-CoA oxidase	acyl-CoA dehydrogenase activity,receptor binding,pristanoyl-CoA oxidase activity,flavin adenine dinucleotide binding,FAD binding	mitochondrion,peroxisome,peroxisomal matrix,membrane	sp	1	2	uniprot_mouse_proteome	>sp|Q9EPL9|ACOX3_MOUSE Peroxisomal acyl-coenzyme A oxidase 3 OS=Mus musculus GN=Acox3 PE=1 SV=2	18	21
TRUE	Old_Native / Young_Native	Old_Native	Young_Native	40	P21447	224811	316443	0.493232	0.493232	40.7595	1.40759	0	1.20309e-12	2.93972e-11	39	0.0553797	P21447	MDR1A_MOUSE	Multidrug resistance protein 1A	Abcb1a	P21447	Mus musculus	G2/M transition of mitotic cell cycle,drug transmembrane transport,drug transport,xenobiotic transport,phospholipid translocation,regulation of response to osmotic stress,stem cell proliferation,ceramide translocation,positive regulation of anion channel activity,regulation of chloride transport	ATP binding,xenobiotic-transporting ATPase activity,ATPase activity, coupled,phosphatidylcholine-translocating ATPase activity,phosphatidylethanolamine-translocating ATPase activity,ceramide-translocating ATPase activity	plasma membrane,cell surface,integral component of membrane,apical plasma membrane,intercellular canaliculus,extracellular exosome	sp	1	3	uniprot_mouse_proteome	>sp|P21447|MDR1A_MOUSE Multidrug resistance protein 1A OS=Mus musculus GN=Abcb1a PE=1 SV=3	7	8
TRUE	Old_Native / Young_Native	Old_Native	Young_Native	75	Q61881	610514	280707	-1.12096	1.12096	-54.0211	0.459789	0	1.26352e-12	3.05418e-11	74	0.139558	Q61881	MCM7_MOUSE	DNA replication licensing factor MCM7	Mcm7	Q61881	Mus musculus	DNA unwinding involved in DNA replication,DNA replication initiation,cellular response to DNA damage stimulus,cell cycle,cell proliferation,regulation of phosphorylation,response to drug,cellular response to epidermal growth factor stimulus,cellular response to xenobiotic stimulus	single-stranded DNA binding,protein binding,ATP binding,DNA helicase activity,ATP-dependent DNA helicase activity	nuclear chromosome, telomeric region,nucleus,nucleoplasm,cytosol,membrane,MCM complex	sp	1	1	uniprot_mouse_proteome	>sp|Q61881|MCM7_MOUSE DNA replication licensing factor MCM7 OS=Mus musculus GN=Mcm7 PE=1 SV=1	15	15
TRUE	Old_Native / Young_Native	Old_Native	Young_Native	45	Q9Z0E6	212303	384042	0.855139	0.855139	80.8933	1.80893	0	1.58091e-12	3.78074e-11	44	0.112835	Q9Z0E6	GBP2_MOUSE	Guanylate-binding protein 1	Gbp2	Q9Z0E6	Mus musculus	cellular response to interferon-beta,defense response to protozoan,adhesion of symbiont to host,defense response to Gram-positive bacterium,cellular response to lipopolysaccharide,cellular response to interferon-gamma	GTPase activity,GTP binding	Golgi membrane,nucleoplasm,cytosol,actin cytoskeleton,symbiont-containing vacuole membrane,cytoplasmic vesicle,perinuclear region of cytoplasm	sp	1	1	uniprot_mouse_proteome	>sp|Q9Z0E6|GBP2_MOUSE Guanylate-binding protein 1 OS=Mus musculus GN=Gbp2 PE=1 SV=1	7	9
TRUE	Old_Native / Young_Native	Old_Native	Young_Native	515	Q3UH59;Q5SV64;Q61879	10511262	10392938	-0.0163323	0.0163323	-1.12569	0.988743	0	1.70732e-12	4.04006e-11	514	0.0260032	Q3UH59;Q5SV64;Q61879	Q3UH59_MOUSE;Q5SV64_MOUSE;MYH10_MOUSE	Myosin-10	Myh10	Q3UH59;Q5SV64;Q61879	Mus musculus	;;mitotic cytokinesis,in utero embryonic development,neuron migration,plasma membrane repair,cardiac septum development,exocytosis,substrate-dependent cell migration, cell extension,nuclear migration,cell adhesion,axonogenesis,axon guidance,brain development,heart development,adult heart development,cell proliferation,regulation of cell shape,fourth ventricle development,lateral ventricle develop…	;;microfilament motor activity,protein binding,calmodulin binding,ATP binding,ATPase activity,actin-dependent ATPase activity,ADP binding,actin filament binding	;;stress fiber,nucleus,cytoplasm,cytosol,brush border,cell cortex,myosin complex,myosin II complex,lamellipodium,axon,growth cone,midbody,cleavage furrow,actomyosin,neuron projection,neuronal cell body,dendritic spine,extracellular exosome,myosin II filament,spindle,plasma membrane,neuromuscular junction	tr;tr;sp	1	1;1;2	uniprot_mouse_proteome	>tr|Q3UH59|Q3UH59_MOUSE Myosin-10 OS=Mus musculus GN=Myh10 PE=1 SV=1;>tr|Q5SV64|Q5SV64_MOUSE Myosin-10 OS=Mus musculus GN=Myh10 PE=1 SV=1;>sp|Q61879|MYH10_MOUSE Myosin-10 OS=Mus musculus GN=Myh10 PE=1 SV=2	85	103
TRUE	Old_Native / Young_Native	Old_Native	Young_Native	95	A0A075B5P3	2.77688e+06	7794839	1.48905	1.48905	180.705	2.80705	0	1.92885e-12	4.51673e-11	94	0.152934	A0A075B5P3	A0A075B5P3_MOUSE	Protein Ighg2b (Fragment)	Ighg2b	A0A075B5P3	Mus musculus				tr	1	1	uniprot_mouse_proteome	>tr|A0A075B5P3|A0A075B5P3_MOUSE Protein Ighg2b (Fragment) OS=Mus musculus GN=Ighg2b PE=1 SV=1	12	19
TRUE	Old_Native / Young_Native	Old_Native	Young_Native	120	Q7TMB8	729660	902063	0.306003	0.306003	23.6278	1.23628	0	2.49824e-12	5.78974e-11	119	0.0444709	Q7TMB8	CYFP1_MOUSE	Cytoplasmic FMR1-interacting protein 1	Cyfip1	Q7TMB8	Mus musculus	regulation of translation,regulation of cell shape,Rac protein signal transduction,lamellipodium assembly,neuron projection development,ruffle organization,cellular response to insulin stimulus,positive regulation of axon extension,axon extension,cognition,positive regulation of neurotrophin TRK receptor signaling pathway,response to electrical stimulus,dendrite extension,modification of synaptic…	RNA 7-methylguanosine cap binding,protein binding,profilin binding,protein complex binding,Rac GTPase binding,actin filament binding	ruffle,mRNA cap binding complex,focal adhesion,lamellipodium,SCAR complex,filopodium tip,neuron projection,neuronal cell body,terminal bouton,dendritic spine,dendritic growth cone,axonal growth cone,perinuclear region of cytoplasm,excitatory synapse,extracellular exosome,Requires Ontology	sp	1	1	uniprot_mouse_proteome	>sp|Q7TMB8|CYFP1_MOUSE Cytoplasmic FMR1-interacting protein 1 OS=Mus musculus GN=Cyfip1 PE=1 SV=1	23	24
TRUE	Old_Native / Young_Native	Old_Native	Young_Native	85	Q9JK53	2474164	3.5842e+06	0.534709	0.534709	44.865	1.44865	0	2.55674e-12	5.80561e-11	84	0.069449	Q9JK53	PRELP_MOUSE	Prolargin	Prelp	Q9JK53	Mus musculus	cell aging,axonogenesis	extracellular matrix structural constituent,heparin binding	proteinaceous extracellular matrix,extracellular space,extracellular matrix,extracellular exosome,extracellular vesicle	sp	1	2	uniprot_mouse_proteome	>sp|Q9JK53|PRELP_MOUSE Prolargin OS=Mus musculus GN=Prelp PE=1 SV=2	13	17
TRUE	Old_Native / Young_Native	Old_Native	Young_Native	70	Q9WVB3	1153270	421869	-1.45086	1.45086	-63.4198	0.365802	0	2.55435e-12	5.80561e-11	69	0.267514	Q9WVB3	TLE6_MOUSE	Transducin-like enhancer protein 6	Tle6	Q9WVB3	Mus musculus	positive regulation of neuron differentiation,positive regulation of neurogenesis,embryonic process involved in female pregnancy	protein binding	nucleus,cytosol,cell cortex,protein complex	sp	1	1	uniprot_mouse_proteome	>sp|Q9WVB3|TLE6_MOUSE Transducin-like enhancer protein 6 OS=Mus musculus GN=Tle6 PE=1 SV=1	13	14
TRUE	Old_Native / Young_Native	Old_Native	Young_Native	165	Q61233	2333790	3191432	0.451529	0.451529	36.7489	1.36749	0	2.60392e-12	5.8536e-11	164	0.0573765	Q61233	PLSL_MOUSE	Plastin-2	Lcp1	Q61233	Mus musculus	T cell activation involved in immune response,response to wounding,protein kinase A signaling,cell migration,extracellular matrix disassembly,animal organ regeneration,regulation of intracellular protein transport,actin filament bundle assembly,actin filament network formation,actin crosslink formation,positive regulation of podosome assembly	integrin binding,calcium ion binding,protein binding,identical protein binding,actin filament binding,GTPase binding	ruffle,phagocytic cup,podosome,extracellular space,cytoplasm,cytosol,actin filament,plasma membrane,focal adhesion,actin cytoskeleton,filopodium,actin filament bundle,ruffle membrane,perinuclear region of cytoplasm,extracellular exosome,stress fiber	sp	1	4	uniprot_mouse_proteome	>sp|Q61233|PLSL_MOUSE Plastin-2 OS=Mus musculus GN=Lcp1 PE=1 SV=4	28	33
TRUE	Old_Native / Young_Native	Old_Native	Young_Native	40	A0A0R4J138;P50429;P50429-2	565506	862139	0.608378	0.608378	52.4544	1.52454	0	2.66241e-12	5.92585e-11	39	0.0627496	A0A0R4J138;P50429;P50429-2	A0A0R4J138_MOUSE;ARSB_MOUSE;ARSB_MOUSE	Arylsulfatase B;Arylsulfatase B;Isoform 2 of Arylsulfatase B	Arsb	A0A0R4J138;P50429;P50429-2	Mus musculus	;metabolic process,regulation of epithelial cell migration,positive regulation of neuron projection development,colon epithelial cell migration;	;N-acetylgalactosamine-4-sulfatase activity,arylsulfatase activity,metal ion binding;	;lysosome,cell surface,extracellular exosome;	tr;sp;sp	1;1;	1;3;	uniprot_mouse_proteome	>tr|A0A0R4J138|A0A0R4J138_MOUSE Arylsulfatase B OS=Mus musculus GN=Arsb PE=1 SV=1;>sp|P50429|ARSB_MOUSE Arylsulfatase B OS=Mus musculus GN=Arsb PE=1 SV=3;>sp|P50429-2|ARSB_MOUSE Isoform 2 of Arylsulfatase B OS=Mus musculus GN=Arsb	8	8
TRUE	Old_Native / Young_Native	Old_Native	Young_Native	460	P19096	2.87633e+06	2.35532e+06	-0.288306	0.288306	-18.1137	0.818863	0	3.21092e-12	7.07662e-11	459	0.0303063	P19096	FAS_MOUSE	Fatty acid synthase	Fasn	P19096	Mus musculus	osteoblast differentiation,acetyl-CoA metabolic process,fatty acid biosynthetic process,mammary gland development,oxidation-reduction process,cellular response to interleukin-4	RNA binding,fatty acid synthase activity,[acyl-carrier-protein] S-acetyltransferase activity,[acyl-carrier-protein] S-malonyltransferase activity,3-oxoacyl-[acyl-carrier-protein] synthase activity,3-oxoacyl-[acyl-carrier-protein] reductase (NADPH) activity,3-hydroxypalmitoyl-[acyl-carrier-protein] dehydratase activity,enoyl-[acyl-carrier-protein] reductase (NADPH, B-specific) activity,oleoyl-[acy…	mitochondrion,Golgi apparatus,cytosol,plasma membrane,membrane,melanosome,glycogen granule,extracellular exosome	sp	1	2	uniprot_mouse_proteome	>sp|P19096|FAS_MOUSE Fatty acid synthase OS=Mus musculus GN=Fasn PE=1 SV=2	78	92
TRUE	Old_Native / Young_Native	Old_Native	Young_Native	155	P29341	4303121	3.68289e+06	-0.224543	0.224543	-14.4134	0.855866	0	3.28452e-12	7.16855e-11	154	0.0415995	P29341	PABP1_MOUSE	Polyadenylate-binding protein 1	Pabpc1	P29341	Mus musculus	nuclear-transcribed mRNA catabolic process, nonsense-mediated decay,mRNA processing,RNA splicing,gene silencing by RNA,positive regulation of viral genome replication,positive regulation of nuclear-transcribed mRNA poly(A) tail shortening,positive regulation of nuclear-transcribed mRNA catabolic process, deadenylation-dependent decay,negative regulation of nuclear-transcribed mRNA catabolic proce…	RNA binding,mRNA 3'-UTR binding,protein binding,protein C-terminus binding,poly(A) binding,poly(U) RNA binding	nucleus,cytoplasm,cytosol,focal adhesion,cytoplasmic stress granule,membrane,dendrite,intracellular ribonucleoprotein complex,cytoplasmic ribonucleoprotein granule,extracellular exosome,catalytic step 2 spliceosome,messenger ribonucleoprotein complex	sp	1	2	uniprot_mouse_proteome	>sp|P29341|PABP1_MOUSE Polyadenylate-binding protein 1 OS=Mus musculus GN=Pabpc1 PE=1 SV=2	24	31
TRUE	Old_Native / Young_Native	Old_Native	Young_Native	65	P11679	545480	722578	0.405626	0.405626	32.4664	1.32466	0	4.28713e-12	9.26679e-11	64	0.0931914	P11679	K2C8_MOUSE	Keratin, type II cytoskeletal 8	Krt8	P11679	Mus musculus	cell morphogenesis involved in differentiation,multicellular organism development,tumor necrosis factor-mediated signaling pathway,sarcomere organization,response to hydrostatic pressure,response to other organism,cell differentiation involved in embryonic placenta development,extrinsic apoptotic signaling pathway,hepatocyte apoptotic process	structural molecule activity,protein binding,protein complex binding,scaffold protein binding	nucleus,nucleoplasm,cytoplasm,intermediate filament,cell-cell junction,dystrophin-associated glycoprotein complex,apicolateral plasma membrane,nuclear matrix,Z disc,sarcolemma,costamere,keratin filament,intermediate filament cytoskeleton,extracellular exosome,cell periphery	sp	1	4	uniprot_mouse_proteome	>sp|P11679|K2C8_MOUSE Keratin, type II cytoskeletal 8 OS=Mus musculus GN=Krt8 PE=1 SV=4	12	13
TRUE	Old_Native / Young_Native	Old_Native	Young_Native	255	Q8CAQ8-2	5204376	6810335	0.388001	0.388001	30.8579	1.30858	0	4.34414e-12	9.30061e-11	254	0.0493198	Q8CAQ8-2	MIC60_MOUSE	Isoform 2 of MICOS complex subunit Mic60	Immt	Q8CAQ8-2	Mus musculus				sp			uniprot_mouse_proteome	>sp|Q8CAQ8-2|MIC60_MOUSE Isoform 2 of MICOS complex subunit Mic60 OS=Mus musculus GN=Immt	35	51
TRUE	Old_Native / Young_Native	Old_Native	Young_Native	285	Q61838	3.90592e+06	5.14362e+06	0.397121	0.397121	31.6877	1.31688	0	4.52317e-12	9.59254e-11	284	0.0475856	Q61838	PZP_MOUSE	Pregnancy zone protein	Pzp	Q61838	Mus musculus	embryo implantation,negative regulation of endopeptidase activity	endopeptidase inhibitor activity,serine-type endopeptidase inhibitor activity,protein complex binding,brain-derived neurotrophic factor binding,nerve growth factor binding	extracellular region,extracellular space	sp	1	3	uniprot_mouse_proteome	>sp|Q61838|PZP_MOUSE Pregnancy zone protein OS=Mus musculus GN=Pzp PE=1 SV=3	46	57
TRUE	Old_Native / Young_Native	Old_Native	Young_Native	100	Q60598	2.82361e+06	3.51711e+06	0.316851	0.316851	24.5608	1.24561	0	5.08805e-12	1.06897e-10	99	0.0457078	Q60598	SRC8_MOUSE	Src substrate cortactin	Cttn	Q60598	Mus musculus	intracellular protein transport,receptor-mediated endocytosis,substrate-dependent cell migration, cell extension,actin filament polymerization,regulation of axon extension,positive regulation of actin filament polymerization,actin cytoskeleton reorganization,positive regulation of smooth muscle contraction,focal adhesion assembly,neuron projection morphogenesis,cell motility,dendritic spine maint…	protein binding,profilin binding,cadherin binding	ruffle,podosome,cytoplasm,Golgi apparatus,cytosol,plasma membrane,clathrin-coated pit,focal adhesion,cell cortex,lamellipodium,cell junction,cortical cytoskeleton,dendritic spine,intracellular membrane-bounded organelle,extracellular exosome,mitotic spindle midzone,actin filament,voltage-gated potassium channel complex,growth cone	sp	1	2	uniprot_mouse_proteome	>sp|Q60598|SRC8_MOUSE Src substrate cortactin OS=Mus musculus GN=Cttn PE=1 SV=2	16	20
TRUE	Old_Native / Young_Native	Old_Native	Young_Native	150	Q9EQ20	5.21406e+06	6.28493e+06	0.269491	0.269491	20.5383	1.20538	0	8.37722e-12	1.7437e-10	149	0.0447661	Q9EQ20	MMSA_MOUSE	Methylmalonate-semialdehyde dehydrogenase [acylating], mitochondrial	Aldh6a1	Q9EQ20	Mus musculus	thymine catabolic process,valine catabolic process,brown fat cell differentiation,oxidation-reduction process	RNA binding,methylmalonate-semialdehyde dehydrogenase (acylating) activity,malonate-semialdehyde dehydrogenase (acetylating) activity	nucleoplasm,mitochondrion,extracellular exosome	sp	1	1	uniprot_mouse_proteome	>sp|Q9EQ20|MMSA_MOUSE Methylmalonate-semialdehyde dehydrogenase [acylating], mitochondrial OS=Mus musculus GN=Aldh6a1 PE=1 SV=1	23	30
TRUE	Old_Native / Young_Native	Old_Native	Young_Native	55	O88531	2117742	3.0551e+06	0.528693	0.528693	44.2622	1.44262	0	1.00529e-11	2.07331e-10	54	0.0602971	O88531	PPT1_MOUSE	Palmitoyl-protein thioesterase 1	Ppt1	O88531	Mus musculus	protein depalmitoylation,receptor-mediated endocytosis,pinocytosis,lysosome organization,lysosomal lumen acidification,neurotransmitter secretion,nervous system development,brain development,visual perception,grooming behavior,associative learning,adult locomotory behavior,protein transport,lipid catabolic process,negative regulation of cell growth,membrane raft organization,regulation of phospho…	protein binding,palmitoyl-(protein) hydrolase activity,palmitoyl-CoA hydrolase activity	extracellular region,extracellular space,nucleus,lysosome,Golgi apparatus,cytosol,synaptic vesicle,membrane,axon,dendrite,neuronal cell body,membrane raft,extracellular exosome	sp	1	2	uniprot_mouse_proteome	>sp|O88531|PPT1_MOUSE Palmitoyl-protein thioesterase 1 OS=Mus musculus GN=Ppt1 PE=1 SV=2	7	11
TRUE	Old_Native / Young_Native	Old_Native	Young_Native	75	A0A0R4J1Q7;G3X9S2;P06802;P06802-2	455477	660384	0.535926	0.535926	44.9873	1.44987	0	1.13517e-11	2.31987e-10	74	0.0806931	A0A0R4J1Q7;G3X9S2;P06802;P06802-2	A0A0R4J1Q7_MOUSE;G3X9S2_MOUSE;ENPP1_MOUSE;ENPP1_MOUSE	Ectonucleotide pyrophosphatase/phosphodiesterase 1, isoform CRA_a;Ectonucleotide pyrophosphatase/phosphodiesterase 1, isoform CRA_d;Ectonucleotide pyrophosphatase/phosphodiesterase family member 1;Isoform 1 of Ectonucleotide pyrophosphatase/phosphodiesterase family member 1	Enpp1	A0A0R4J1Q7;G3X9S2;P06802;P06802-2	Mus musculus	;;generation of precursor metabolites and energy,phosphate-containing compound metabolic process,receptor-mediated endocytosis,immune response,nucleoside triphosphate catabolic process,negative regulation of ossification,negative regulation of cell growth,inorganic diphosphate transport,cellular phosphate ion homeostasis,sequestering of triglyceride,biomineral tissue development,negative regulati…	;;nucleic acid binding,exonuclease activity,phosphodiesterase I activity,nucleotide diphosphatase activity,scavenger receptor activity,insulin receptor binding,calcium ion binding,ATP binding,zinc ion binding,polysaccharide binding,NADH pyrophosphatase activity,identical protein binding,protein homodimerization activity,nucleoside-triphosphate diphosphatase activity;	;;extracellular space,lysosomal membrane,plasma membrane,integral component of plasma membrane,cell surface,integral component of membrane,basolateral plasma membrane;	tr;tr;sp;sp	1;1;1;	1;1;4;	uniprot_mouse_proteome	>tr|A0A0R4J1Q7|A0A0R4J1Q7_MOUSE Ectonucleotide pyrophosphatase/phosphodiesterase 1, isoform CRA_a OS=Mus musculus GN=Enpp1 PE=1 SV=1;>tr|G3X9S2|G3X9S2_MOUSE Ectonucleotide pyrophosphatase/phosphodiesterase 1, isoform CRA_d OS=Mus musculus GN=Enpp1 PE=1 SV=1;>sp|P06802|ENPP1_MOUSE Ectonucleotide pyrophosphatase/phosphodiesterase family member 1 OS=Mus musculus GN=Enpp1 PE=1 SV=4;>sp|P06802-2|ENPP1…	15	15
TRUE	Old_Native / Young_Native	Old_Native	Young_Native	190	E9PVU0;E9Q175	2.30615e+06	2.31208e+06	0.00370247	0.00370247	0.256965	1.00257	0	1.23377e-11	2.47636e-10	189	0.039456	E9PVU0;E9Q175	E9PVU0_MOUSE;E9Q175_MOUSE	Unconventional myosin-VI	Myo6	E9PVU0;E9Q175	Mus musculus	;	;	;	tr	1	1	uniprot_mouse_proteome	>tr|E9PVU0|E9PVU0_MOUSE Unconventional myosin-VI OS=Mus musculus GN=Myo6 PE=1 SV=1;>tr|E9Q175|E9Q175_MOUSE Unconventional myosin-VI OS=Mus musculus GN=Myo6 PE=1 SV=1	34	38
TRUE	Old_Native / Young_Native	Old_Native	Young_Native	50	Q8K354	1.09313e+06	1.32203e+06	0.274293	0.274293	20.9401	1.2094	0	1.23288e-11	2.47636e-10	49	0.0384136	Q8K354	CBR3_MOUSE	Carbonyl reductase [NADPH] 3	Cbr3	Q8K354	Mus musculus	phylloquinone catabolic process,cognition,oxidation-reduction process	3-keto sterol reductase activity,carbonyl reductase (NADPH) activity,NADPH binding	extracellular space,nucleoplasm,cytosol	sp	1	1	uniprot_mouse_proteome	>sp|Q8K354|CBR3_MOUSE Carbonyl reductase [NADPH] 3 OS=Mus musculus GN=Cbr3 PE=1 SV=1	10	10
TRUE	Old_Native / Young_Native	Old_Native	Young_Native	145	P68040	9640745	8475577	-0.185833	0.185833	-12.0859	0.879141	0	1.37527e-11	2.73594e-10	144	0.0351247	P68040	RACK1_MOUSE	Receptor of activated protein C kinase 1	Rack1	P68040	Mus musculus	osteoblast differentiation,positive regulation of protein phosphorylation,translation,apoptotic process,activation of cysteine-type endopeptidase activity involved in apoptotic process,cell cycle,gastrulation,protein localization,negative regulation of gene expression,protein ubiquitination,negative regulation of translation,negative regulation of Wnt signaling pathway,negative regulation of cell…	RNA binding,receptor activity,protein kinase C binding,protein binding,ion channel inhibitor activity,cysteine-type endopeptidase activator activity involved in apoptotic process,enzyme binding,protein phosphatase binding,protein tyrosine kinase inhibitor activity,cyclin binding,receptor tyrosine kinase binding,signaling adaptor activity,SH2 domain binding,protein homodimerization activity,riboso…	phagocytic cup,nucleus,nucleoplasm,cytoplasm,mitochondrion,cytosol,small ribosomal subunit,dendrite,midbody,neuron projection,neuronal cell body,perikaryon,cell body,perinuclear region of cytoplasm,extracellular exosome,IRE1-RACK1-PP2A complex	sp	1	3	uniprot_mouse_proteome	>sp|P68040|RACK1_MOUSE Receptor of activated protein C kinase 1 OS=Mus musculus GN=Rack1 PE=1 SV=3	19	29
TRUE	Old_Native / Young_Native	Old_Native	Young_Native	80	Q8C854	1.04989e+06	811944	-0.370779	0.370779	-22.6635	0.773365	0	1.89126e-11	3.72943e-10	79	0.0495654	Q8C854	MYEF2_MOUSE	Myelin expression factor 2	Myef2	Q8C854	Mus musculus	negative regulation of transcription from RNA polymerase II promoter,transcription, DNA-templated	RNA polymerase II core promoter proximal region sequence-specific DNA binding,transcriptional repressor activity, RNA polymerase II core promoter proximal region sequence-specific binding,single-stranded DNA binding,RNA binding	nucleus	sp	1	1	uniprot_mouse_proteome	>sp|Q8C854|MYEF2_MOUSE Myelin expression factor 2 OS=Mus musculus GN=Myef2 PE=1 SV=1	15	16
TRUE	Old_Native / Young_Native	Old_Native	Young_Native	35	P97821	248269	416906	0.74782	0.74782	67.9254	1.67925	0	2.06605e-11	4.03868e-10	34	0.0863	P97821	CATC_MOUSE	Dipeptidyl peptidase 1	Ctsc	P97821	Mus musculus	T cell mediated cytotoxicity,proteolysis,apoptotic process,aging,response to organic substance,proteolysis involved in cellular protein catabolic process,positive regulation of proteolysis involved in cellular protein catabolic process,positive regulation of apoptotic signaling pathway	cysteine-type endopeptidase activity,serine-type endopeptidase activity,cysteine-type peptidase activity,peptidase activator activity involved in apoptotic process,phosphatase binding,chloride ion binding,identical protein binding,protein self-association,chaperone binding	extracellular space,nucleoplasm,lysosome,endoplasmic reticulum,Golgi apparatus,centrosome,membrane,intracellular membrane-bounded organelle,extracellular exosome	sp	1	1	uniprot_mouse_proteome	>sp|P97821|CATC_MOUSE Dipeptidyl peptidase 1 OS=Mus musculus GN=Ctsc PE=1 SV=1	5	7
TRUE	Old_Native / Young_Native	Old_Native	Young_Native	155	P50247	7.53403e+06	9702507	0.364935	0.364935	28.7824	1.28782	0	2.40175e-11	4.65442e-10	154	0.045787	P50247	SAHH_MOUSE	Adenosylhomocysteinase	Ahcy	P50247	Mus musculus	one-carbon metabolic process,S-adenosylhomocysteine catabolic process,S-adenosylmethionine cycle	adenosylhomocysteinase activity,copper ion binding,protein binding,protein self-association,NAD binding	cytosol,melanosome,extracellular exosome	sp	1	3	uniprot_mouse_proteome	>sp|P50247|SAHH_MOUSE Adenosylhomocysteinase OS=Mus musculus GN=Ahcy PE=1 SV=3	21	31
TRUE	Old_Native / Young_Native	Old_Native	Young_Native	60	Q04997	3.15837e+06	1.83412e+06	-0.784093	0.784093	-41.9283	0.580717	0	2.6777e-11	5.14485e-10	59	0.133441	Q04997	INHA_MOUSE	Inhibin alpha chain	Inha	Q04997	Mus musculus	ovarian follicle development,male gonad development,regulation of receptor activity,positive regulation of pathway-restricted SMAD protein phosphorylation,BMP signaling pathway,regulation of cell proliferation,hemoglobin biosynthetic process,regulation of apoptotic process,regulation of MAPK cascade,negative regulation of follicle-stimulating hormone secretion,cell development,regulation of cell …	receptor binding,cytokine activity,transforming growth factor beta receptor binding,hormone activity,growth factor activity,inhibin binding,protein heterodimerization activity	photoreceptor outer segment,photoreceptor inner segment,extracellular space,cytoplasm,inhibin-betaglycan-ActRII complex,neuronal cell body,inhibin A complex,inhibin B complex	sp	1	2	uniprot_mouse_proteome	>sp|Q04997|INHA_MOUSE Inhibin alpha chain OS=Mus musculus GN=Inha PE=1 SV=2	7	12
TRUE	Old_Native / Young_Native	Old_Native	Young_Native	135	Q8BMK4	1.34771e+06	1.11145e+06	-0.27807	0.27807	-17.5307	0.824693	0	2.9438e-11	5.60819e-10	134	0.0412355	Q8BMK4	CKAP4_MOUSE	Cytoskeleton-associated protein 4	Ckap4	Q8BMK4	Mus musculus	biological_process	RNA binding	endoplasmic reticulum,endoplasmic reticulum membrane,rough endoplasmic reticulum,lipid particle,cytosol,cytoskeleton,plasma membrane,cell surface,integral component of membrane,nuclear speck,extracellular matrix,cytoplasmic ribonucleoprotein granule,perinuclear region of cytoplasm,extracellular exosome	sp	1	2	uniprot_mouse_proteome	>sp|Q8BMK4|CKAP4_MOUSE Cytoskeleton-associated protein 4 OS=Mus musculus GN=Ckap4 PE=1 SV=2	22	27
TRUE	Old_Native / Young_Native	Old_Native	Young_Native	90	Q9WV54	1.69458e+06	2443047	0.527756	0.527756	44.1685	1.44168	0	3.08689e-11	5.83137e-10	89	0.0752833	Q9WV54	ASAH1_MOUSE	Acid ceramidase	Asah1	Q9WV54	Mus musculus	lipid metabolic process	ceramidase activity	extracellular space,lysosome,extracellular exosome	sp	1	1	uniprot_mouse_proteome	>sp|Q9WV54|ASAH1_MOUSE Acid ceramidase OS=Mus musculus GN=Asah1 PE=1 SV=1	15	18
TRUE	Old_Native / Young_Native	Old_Native	Young_Native	35	O70165	84065.3	316853	1.91423	1.91423	276.913	3.76913	0	3.64676e-11	6.83159e-10	34	0.212141	O70165	FCN1_MOUSE	Ficolin-1	Fcn1	O70165	Mus musculus	complement activation, lectin pathway,cell surface pattern recognition receptor signaling pathway,G-protein coupled receptor signaling pathway,positive regulation of interleukin-8 secretion	protein binding,signaling pattern recognition receptor activity,carbohydrate binding,metal ion binding,carbohydrate derivative binding	extracellular region,collagen trimer,extrinsic component of external side of plasma membrane	sp	1	1	uniprot_mouse_proteome	>sp|O70165|FCN1_MOUSE Ficolin-1 OS=Mus musculus GN=Fcn1 PE=1 SV=1	6	7
TRUE	Old_Native / Young_Native	Old_Native	Young_Native	130	P13864	559559	362136	-0.627759	0.627759	-35.2819	0.647181	0	3.73335e-11	6.93601e-10	129	0.161507	P13864	DNMT1_MOUSE	DNA (cytosine-5)-methyltransferase 1	Dnmt1	P13864	Mus musculus	negative regulation of transcription from RNA polymerase II promoter,chromatin silencing at rDNA,DNA methylation,transcription, DNA-templated,Ras protein signal transduction,maintenance of DNA methylation,regulation of gene expression,positive regulation of gene expression,gene silencing,chromatin modification,DNA methylation on cytosine,regulation of cell proliferation,DNA methylation involved i…	DNA binding,chromatin binding,RNA binding,DNA (cytosine-5-)-methyltransferase activity,protein binding,methyltransferase activity,zinc ion binding,methyl-CpG binding,DNA-methyltransferase activity,DNA (cytosine-5-)-methyltransferase activity, acting on CpG substrates,promoter-specific chromatin binding	heterochromatin,nucleus,nucleoplasm,replication fork,pericentric heterochromatin,cytoplasm	sp	1	5	uniprot_mouse_proteome	>sp|P13864|DNMT1_MOUSE DNA (cytosine-5)-methyltransferase 1 OS=Mus musculus GN=Dnmt1 PE=1 SV=5	25	26
TRUE	Old_Native / Young_Native	Old_Native	Young_Native	245	Q9JKR6	4.09686e+06	3984808	-0.0400099	0.0400099	-2.73517	0.972648	0	3.81438e-11	7.02846e-10	244	0.0283599	Q9JKR6	HYOU1_MOUSE	Hypoxia up-regulated protein 1	Hyou1	Q9JKR6	Mus musculus	response to ischemia,ER to Golgi vesicle-mediated transport,receptor-mediated endocytosis,response to endoplasmic reticulum stress,negative regulation of apoptotic process,cellular response to hypoxia,negative regulation of hypoxia-induced intrinsic apoptotic signaling pathway,negative regulation of endoplasmic reticulum stress-induced neuron intrinsic apoptotic signaling pathway	ATP binding	extracellular region,endoplasmic reticulum lumen,focal adhesion,membrane,endoplasmic reticulum chaperone complex,extracellular exosome	sp	1	1	uniprot_mouse_proteome	>sp|Q9JKR6|HYOU1_MOUSE Hypoxia up-regulated protein 1 OS=Mus musculus GN=Hyou1 PE=1 SV=1	35	49
TRUE	Old_Native / Young_Native	Old_Native	Young_Native	150	Q9CPY7;Q9CPY7-2	2.11668e+06	1.7764e+06	-0.252853	0.252853	-16.0765	0.839235	0	4.24144e-11	7.68931e-10	149	0.0430686	Q9CPY7;Q9CPY7-2	AMPL_MOUSE	Cytosol aminopeptidase;Isoform 2 of Cytosol aminopeptidase	Lap3	Q9CPY7;Q9CPY7-2	Mus musculus	proteolysis;	aminopeptidase activity,peptidase activity,metalloexopeptidase activity,manganese ion binding;	nucleus,nucleoplasm,mitochondrion,trans-Golgi network,cytosol,focal adhesion,midbody,extracellular exosome;	sp	1;	3;	uniprot_mouse_proteome	>sp|Q9CPY7|AMPL_MOUSE Cytosol aminopeptidase OS=Mus musculus GN=Lap3 PE=1 SV=3;>sp|Q9CPY7-2|AMPL_MOUSE Isoform 2 of Cytosol aminopeptidase OS=Mus musculus GN=Lap3	22	30
TRUE	Old_Native / Young_Native	Old_Native	Young_Native	40	Q9R1E0	226589	98012.5	-1.20904	1.20904	-56.7445	0.432555	0	4.23144e-11	7.68931e-10	39	0.15658	Q9R1E0	FOXO1_MOUSE	Forkhead box protein O1	Foxo1	Q9R1E0	Mus musculus	negative regulation of transcription from RNA polymerase II promoter,blood vessel development,transcription, DNA-templated,regulation of transcription, DNA-templated,autophagy,apoptotic process,cellular response to DNA damage stimulus,insulin receptor signaling pathway,cellular response to starvation,anatomical structure morphogenesis,positive regulation of autophagy,cell differentiation,cellular…	transcription factor activity, transcription factor binding,transcriptional repressor activity, RNA polymerase II core promoter proximal region sequence-specific binding,transcription coactivator binding,transcriptional repressor activity, RNA polymerase II transcription regulatory region sequence-specific binding,DNA binding,transcription factor activity, sequence-specific DNA binding,protein bi…	nucleus,nucleoplasm,cytoplasm,cytosol	sp	1	2	uniprot_mouse_proteome	>sp|Q9R1E0|FOXO1_MOUSE Forkhead box protein O1 OS=Mus musculus GN=Foxo1 PE=1 SV=2	7	8
TRUE	Old_Native / Young_Native	Old_Native	Young_Native	150	P09405	11726934	9298160	-0.334809	0.334809	-20.7111	0.792889	0	5.35044e-11	9.62223e-10	149	0.0467226	P09405	NUCL_MOUSE	Nucleolin	Ncl	P09405	Mus musculus	angiogenesis,negative regulation of translation,positive regulation of transcription from RNA polymerase II promoter,cellular response to epidermal growth factor stimulus,positive regulation of transcription of nuclear large rRNA transcript from RNA polymerase I promoter,cellular response to leukemia inhibitory factor	RNA binding,protein binding,protein C-terminus binding,telomeric DNA binding,identical protein binding,DNA topoisomerase binding,mRNA 5'-UTR binding	nucleus,nucleoplasm,nucleolus,cell cortex,membrane,intracellular ribonucleoprotein complex,cytoplasmic ribonucleoprotein granule,extracellular exosome	sp	1	2	uniprot_mouse_proteome	>sp|P09405|NUCL_MOUSE Nucleolin OS=Mus musculus GN=Ncl PE=1 SV=2	24	30
TRUE	Old_Native / Young_Native	Old_Native	Young_Native	235	P97479;P97479-2	1.00444e+06	1.26941e+06	0.337771	0.337771	26.3802	1.2638	0	5.54712e-11	9.89677e-10	234	0.0521219	P97479;P97479-2	MYO7A_MOUSE	Unconventional myosin-VIIa;Isoform 2 of Unconventional myosin-VIIa	Myo7a	P97479;P97479-2	Mus musculus	phagolysosome assembly,intracellular protein transport,phagocytosis,lysosome organization,sensory perception,visual perception,sensory perception of sound,cell projection organization,actin filament-based movement,inner ear morphogenesis,mechanoreceptor differentiation,auditory receptor cell differentiation,post-embryonic animal organ morphogenesis,inner ear development,sensory perception of ligh…	microfilament motor activity,protein binding,calmodulin binding,ATP binding,protein domain specific binding,spectrin binding,actin-dependent ATPase activity,protein homodimerization activity,ADP binding,protein N-terminus binding,actin filament binding;	photoreceptor outer segment,photoreceptor inner segment,cytoplasm,lysosomal membrane,cytosol,microvillus,cell cortex,apical plasma membrane,myosin VII complex,photoreceptor connecting cilium,stereocilium,melanosome,synapse,upper tip-link density;	sp	1;	2;	uniprot_mouse_proteome	>sp|P97479|MYO7A_MOUSE Unconventional myosin-VIIa OS=Mus musculus GN=Myo7a PE=1 SV=2;>sp|P97479-2|MYO7A_MOUSE Isoform 2 of Unconventional myosin-VIIa OS=Mus musculus GN=Myo7a	45	47
TRUE	Old_Native / Young_Native	Old_Native	Young_Native	90	P97384	1482865	1.78411e+06	0.266817	0.266817	20.3151	1.20315	0	5.74661e-11	1.0172e-09	89	0.0393796	P97384	ANX11_MOUSE	Annexin A11	Anxa11	P97384	Mus musculus	phagocytosis,cytokinetic process,response to calcium ion	RNA binding,calcium ion binding,calcium-dependent phospholipid binding,phosphatidylethanolamine binding,MHC class II protein complex binding,S100 protein binding,calcium-dependent protein binding	nuclear envelope,nucleoplasm,cytoplasm,spindle,cytosol,membrane,midbody,melanosome,specific granule,azurophil granule,phagocytic vesicle,extracellular exosome	sp	1	2	uniprot_mouse_proteome	>sp|P97384|ANX11_MOUSE Annexin A11 OS=Mus musculus GN=Anxa11 PE=1 SV=2	15	18
TRUE	Old_Native / Young_Native	Old_Native	Young_Native	60	A2AQN4;A2AQN5;Q9QXG4	667336	948592	0.507374	0.507374	42.146	1.42146	0	6.60737e-11	1.16042e-09	59	0.0812984	A2AQN4;A2AQN5;Q9QXG4	A2AQN4_MOUSE;A2AQN5_MOUSE;ACSA_MOUSE	Acetyl-coenzyme A synthetase, cytoplasmic;Acetyl-coenzyme A synthetase, cytoplasmic;Acetyl-coenzyme A synthetase, cytoplasmic	Acss2	A2AQN4;A2AQN5;Q9QXG4	Mus musculus	;;acetyl-CoA biosynthetic process,lipid biosynthetic process,acetate biosynthetic process,acetyl-CoA biosynthetic process from acetate,propionate biosynthetic process	;;acetate-CoA ligase activity,ATP binding,AMP binding	;;nucleoplasm,cytoplasm,cytosol,intracellular membrane-bounded organelle	tr;tr;sp	1	1;1;2	uniprot_mouse_proteome	>tr|A2AQN4|A2AQN4_MOUSE Acetyl-coenzyme A synthetase, cytoplasmic OS=Mus musculus GN=Acss2 PE=1 SV=1;>tr|A2AQN5|A2AQN5_MOUSE Acetyl-coenzyme A synthetase, cytoplasmic OS=Mus musculus GN=Acss2 PE=1 SV=1;>sp|Q9QXG4|ACSA_MOUSE Acetyl-coenzyme A synthetase, cytoplasmic OS=Mus musculus GN=Acss2 PE=1 SV=2	12	12
TRUE	Old_Native / Young_Native	Old_Native	Young_Native	80	Q9Z2H5-2	537697	743628	0.467787	0.467787	38.2987	1.38299	0	6.70408e-11	1.16828e-09	79	0.08424	Q9Z2H5-2	E41L1_MOUSE	Isoform 2 of Band 4.1-like protein 1	Epb41l1	Q9Z2H5-2	Mus musculus				sp			uniprot_mouse_proteome	>sp|Q9Z2H5-2|E41L1_MOUSE Isoform 2 of Band 4.1-like protein 1 OS=Mus musculus GN=Epb41l1	16	16
TRUE	Old_Native / Young_Native	Old_Native	Young_Native	120	Q61555	750663	555887	-0.433373	0.433373	-25.9472	0.740528	0	8.38802e-11	1.45048e-09	119	0.141128	Q61555	FBN2_MOUSE	Fibrillin-2	Fbn2	Q61555	Mus musculus	embryonic limb morphogenesis,positive regulation of bone mineralization,limb morphogenesis,sequestering of TGFbeta in extracellular matrix,camera-type eye development,positive regulation of osteoblast differentiation,embryonic eye morphogenesis,bone trabecula formation	extracellular matrix structural constituent,calcium ion binding,protein binding	microfibril,extracellular region,proteinaceous extracellular matrix,extracellular matrix	sp	1	2	uniprot_mouse_proteome	>sp|Q61555|FBN2_MOUSE Fibrillin-2 OS=Mus musculus GN=Fbn2 PE=1 SV=2	22	24
TRUE	Old_Native / Young_Native	Old_Native	Young_Native	155	Q9JIK5	1.08133e+06	817846	-0.4029	0.4029	-24.3664	0.756336	0	8.89134e-11	1.52578e-09	154	0.0825873	Q9JIK5	DDX21_MOUSE	Nucleolar RNA helicase 2	Ddx21	Q9JIK5	Mus musculus	osteoblast differentiation,rRNA processing,transcription from RNA polymerase II promoter,response to virus,RNA secondary structure unwinding,response to exogenous dsRNA	RNA binding,RNA helicase activity,double-stranded RNA binding,ATP-dependent RNA helicase activity,protein binding,ATP binding,rRNA binding,snoRNA binding,miRNA binding,7SK snRNA binding	nucleus,nucleoplasm,nucleolus,cytoplasm,membrane	sp	1	3	uniprot_mouse_proteome	>sp|Q9JIK5|DDX21_MOUSE Nucleolar RNA helicase 2 OS=Mus musculus GN=Ddx21 PE=1 SV=3	28	31
TRUE	Old_Native / Young_Native	Old_Native	Young_Native	45	E0CXN5;P13707	94260.4	297425	1.6578	1.6578	215.536	3.15536	0	8.95987e-11	1.52589e-09	44	0.25018	E0CXN5;P13707	E0CXN5_MOUSE;GPDA_MOUSE	Glycerol-3-phosphate dehydrogenase [NAD(+)];Glycerol-3-phosphate dehydrogenase [NAD(+)], cytoplasmic	Gpd1	E0CXN5;P13707	Mus musculus	;glycerol-3-phosphate metabolic process,gluconeogenesis,NADH oxidation,glycerophosphate shuttle,positive regulation of glycolytic process,glycerol-3-phosphate catabolic process,glycerolipid metabolic process,cellular response to cAMP,cellular response to tumor necrosis factor	;glycerol-3-phosphate dehydrogenase [NAD+] activity,glycerol-3-phosphate dehydrogenase activity,protein homodimerization activity,NAD binding	;mitochondrion,cytosol,glycerol-3-phosphate dehydrogenase complex,extracellular exosome	tr;sp	1	1;3	uniprot_mouse_proteome	>tr|E0CXN5|E0CXN5_MOUSE Glycerol-3-phosphate dehydrogenase [NAD(+)] OS=Mus musculus GN=Gpd1 PE=1 SV=1;>sp|P13707|GPDA_MOUSE Glycerol-3-phosphate dehydrogenase [NAD(+)], cytoplasmic OS=Mus musculus GN=Gpd1 PE=1 SV=3	9	9
TRUE	Old_Native / Young_Native	Old_Native	Young_Native	110	O70423	1.76529e+06	1.43576e+06	-0.298088	0.298088	-18.667	0.81333	0	9.33928e-11	1.57855e-09	109	0.0554108	O70423	AOC3_MOUSE	Membrane primary amine oxidase	Aoc3	O70423	Mus musculus	cell adhesion,amine metabolic process,response to antibiotic,oxidation-reduction process,negative regulation of primary amine oxidase activity	copper ion binding,calcium ion binding,primary amine oxidase activity,protein heterodimerization activity,quinone binding,tryptamine:oxygen oxidoreductase (deaminating) activity,aminoacetone:oxygen oxidoreductase(deaminating) activity,aliphatic-amine oxidase activity,phenethylamine:oxygen oxidoreductase (deaminating) activity	cytoplasm,early endosome,endoplasmic reticulum,Golgi apparatus,plasma membrane,microvillus,cell surface,integral component of membrane	sp	1	3	uniprot_mouse_proteome	>sp|O70423|AOC3_MOUSE Membrane primary amine oxidase OS=Mus musculus GN=Aoc3 PE=1 SV=3	18	22
TRUE	Old_Native / Young_Native	Old_Native	Young_Native	275	Q99KI0	13315828	16289482	0.290799	0.290799	22.3317	1.22332	0	1.21824e-10	2.04374e-09	274	0.0348431	Q99KI0	ACON_MOUSE	Aconitate hydratase, mitochondrial	Aco2	Q99KI0	Mus musculus	liver development,tricarboxylic acid cycle,citrate metabolic process,isocitrate metabolic process,response to isolation stress	aconitate hydratase activity,iron ion binding,3 iron, 4 sulfur cluster binding,4 iron, 4 sulfur cluster binding	mitochondrion,myelin sheath	sp	1	1	uniprot_mouse_proteome	>sp|Q99KI0|ACON_MOUSE Aconitate hydratase, mitochondrial OS=Mus musculus GN=Aco2 PE=1 SV=1	36	55
TRUE	Old_Native / Young_Native	Old_Native	Young_Native	200	Q61656;Q8BTS0	9049449	8.22059e+06	-0.138589	0.138589	-9.15926	0.908407	0	1.33636e-10	2.22529e-09	199	0.0311703	Q61656;Q8BTS0	DDX5_MOUSE;Q8BTS0_MOUSE	Probable ATP-dependent RNA helicase DDX5;DEAD (Asp-Glu-Ala-Asp) box polypeptide 5	Ddx5	Q61656;Q8BTS0	Mus musculus	negative regulation of transcription from RNA polymerase II promoter,alternative mRNA splicing, via spliceosome,regulation of alternative mRNA splicing, via spliceosome,nuclear-transcribed mRNA catabolic process,epithelial to mesenchymal transition,regulation of transcription from RNA polymerase II promoter,circadian rhythm,mRNA transcription,RNA secondary structure unwinding,BMP signaling pathwa…	transcription cofactor activity,RNA binding,RNA helicase activity,mRNA 3'-UTR binding,ATP-dependent RNA helicase activity,protein binding,ATP binding,MH2 domain binding,pre-mRNA binding,ribonucleoprotein complex binding,SMAD binding,androgen receptor binding,R-SMAD binding,primary miRNA binding,promoter-specific chromatin binding;	nucleus,nucleolus,cytoplasm,membrane,intracellular ribonucleoprotein complex,extracellular matrix,extracellular exosome,catalytic step 2 spliceosome,SMAD protein complex;	sp;tr	1	2;1	uniprot_mouse_proteome	>sp|Q61656|DDX5_MOUSE Probable ATP-dependent RNA helicase DDX5 OS=Mus musculus GN=Ddx5 PE=1 SV=2;>tr|Q8BTS0|Q8BTS0_MOUSE DEAD (Asp-Glu-Ala-Asp) box polypeptide 5 OS=Mus musculus GN=Ddx5 PE=1 SV=1	30	40
TRUE	Old_Native / Young_Native	Old_Native	Young_Native	125	A0A0R4IZY0;Q8C1A5	1.28314e+06	1.11162e+06	-0.207019	0.207019	-13.3675	0.866325	0	1.43222e-10	2.34479e-09	124	0.0402152	A0A0R4IZY0;Q8C1A5	A0A0R4IZY0_MOUSE;THOP1_MOUSE	Thimet oligopeptidase	Thop1	A0A0R4IZY0;Q8C1A5	Mus musculus	;proteolysis,peptide metabolic process,intracellular signal transduction	;metalloendopeptidase activity,metal ion binding	;mitochondrial intermembrane space	tr;sp	1	1	uniprot_mouse_proteome	>tr|A0A0R4IZY0|A0A0R4IZY0_MOUSE Thimet oligopeptidase OS=Mus musculus GN=Thop1 PE=1 SV=1;>sp|Q8C1A5|THOP1_MOUSE Thimet oligopeptidase OS=Mus musculus GN=Thop1 PE=1 SV=1	24	25
TRUE	Old_Native / Young_Native	Old_Native	Young_Native	165	P26041	6713422	8643816	0.36462	0.36462	28.7542	1.28754	0	1.42446e-10	2.34479e-09	164	0.0527618	P26041	MOES_MOUSE	Moesin	Msn	P26041	Mus musculus	immunological synapse formation,regulation of cell shape,regulation of cell size,positive regulation of gene expression,gland morphogenesis,membrane to membrane docking,T cell proliferation,establishment of epithelial cell apical/basal polarity,establishment of endothelial barrier,T cell aggregation,cellular response to testosterone stimulus,positive regulation of podosome assembly,T cell migrati…	double-stranded RNA binding,actin binding,receptor binding,enzyme binding,protein kinase binding,cell adhesion molecule binding	uropod,extracellular space,nucleus,cytoplasm,cytosol,cytoskeleton,plasma membrane,microvillus,focal adhesion,cell surface,basolateral plasma membrane,apical plasma membrane,filopodium,pseudopodium,microvillus membrane,vesicle,myelin sheath,apical part of cell,perinuclear region of cytoplasm,extracellular exosome,invadopodium,cell periphery,blood microparticle	sp	1	3	uniprot_mouse_proteome	>sp|P26041|MOES_MOUSE Moesin OS=Mus musculus GN=Msn PE=1 SV=3	19	33
TRUE	Old_Native / Young_Native	Old_Native	Young_Native	60	Q6P9K8;Q6P9K8-2	200859	348819	0.796299	0.796299	73.6641	1.73664	0	1.43941e-10	2.34479e-09	59	0.150658	Q6P9K8;Q6P9K8-2	CSKI1_MOUSE	Caskin-1;Isoform 2 of Caskin-1	Caskin1	Q6P9K8;Q6P9K8-2	Mus musculus	;	identical protein binding;	cytoplasm,membrane;	sp	1;	2;	uniprot_mouse_proteome	>sp|Q6P9K8|CSKI1_MOUSE Caskin-1 OS=Mus musculus GN=Caskin1 PE=1 SV=2;>sp|Q6P9K8-2|CSKI1_MOUSE Isoform 2 of Caskin-1 OS=Mus musculus GN=Caskin1	12	12
TRUE	Old_Native / Young_Native	Old_Native	Young_Native	30	P14602	182920	328831	0.846135	0.846135	79.7678	1.79768	0	1.48444e-10	2.40073e-09	29	0.0848566	P14602	HSPB1_MOUSE	Heat shock protein beta-1	Hspb1	P14602	Mus musculus	retina homeostasis,regulation of protein phosphorylation,negative regulation of protein kinase activity,response to unfolded protein,response to virus,positive regulation of interleukin-1 beta production,intracellular signal transduction,cellular response to vascular endothelial growth factor stimulus,positive regulation of endothelial cell chemotaxis by VEGF-activated vascular endothelial growth…	RNA binding,protein kinase C binding,protein kinase C inhibitor activity,protein kinase binding,identical protein binding,protein homodimerization activity,ubiquitin binding,protein binding involved in protein folding	proteasome complex,extracellular space,intracellular,nucleus,cytoplasm,spindle,plasma membrane,focal adhesion,Z disc,extracellular matrix,contractile fiber,extracellular exosome,axon cytoplasm	sp	1	3	uniprot_mouse_proteome	>sp|P14602|HSPB1_MOUSE Heat shock protein beta-1 OS=Mus musculus GN=Hspb1 PE=1 SV=3	5	6
TRUE	Old_Native / Young_Native	Old_Native	Young_Native	135	Q9D8E6	7405641	6164459	-0.26465	0.26465	-16.76	0.8324	0	1.60167e-10	2.57182e-09	134	0.0565487	Q9D8E6	RL4_MOUSE	60S ribosomal protein L4	Rpl4	Q9D8E6	Mus musculus	cytoplasmic translation	RNA binding,structural constituent of ribosome,protein binding	nucleus,nucleolus,cytoplasm,rough endoplasmic reticulum,focal adhesion,membrane,cytosolic large ribosomal subunit,intracellular ribonucleoprotein complex,extracellular exosome	sp	1	3	uniprot_mouse_proteome	>sp|Q9D8E6|RL4_MOUSE 60S ribosomal protein L4 OS=Mus musculus GN=Rpl4 PE=1 SV=3	19	27
TRUE	Old_Native / Young_Native	Old_Native	Young_Native	110	Q61553	2.15025e+06	1.50673e+06	-0.513082	0.513082	-29.9276	0.700724	0	1.67032e-10	2.66303e-09	109	0.0778289	Q61553	FSCN1_MOUSE	Fascin	Fscn1	Q61553	Mus musculus	cell-cell junction assembly,establishment or maintenance of cell polarity,anatomical structure morphogenesis,positive regulation of lamellipodium assembly,cell migration,microspike assembly,actin cytoskeleton organization,regulation of microvillus assembly,regulation of actin cytoskeleton organization,establishment of apical/basal cell polarity,cell motility,actin filament bundle assembly,positiv…	RNA binding,actin binding,protein binding,drug binding,protein binding, bridging,cadherin binding,actin filament binding	stress fiber,ruffle,podosome,cytoplasm,cytosol,cytoskeleton,microvillus,cell-cell junction,actin cytoskeleton,lamellipodium,filopodium,growth cone,cell projection membrane,filamentous actin,myelin sheath,microspike,extracellular exosome,invadopodium	sp	1	4	uniprot_mouse_proteome	>sp|Q61553|FSCN1_MOUSE Fascin OS=Mus musculus GN=Fscn1 PE=1 SV=4	17	22
TRUE	Old_Native / Young_Native	Old_Native	Young_Native	175	E9PVC5;E9PVC6;E9Q9E1;Q6NZJ6	1.17882e+06	1.04793e+06	-0.169791	0.169791	-11.1029	0.888971	0	2.07683e-10	3.28783e-09	174	0.0420868	E9PVC5;E9PVC6;E9Q9E1;Q6NZJ6	E9PVC5_MOUSE;E9PVC6_MOUSE;E9Q9E1_MOUSE;IF4G1_MOUSE	Eukaryotic translation initiation factor 4 gamma 1	Eif4g1	E9PVC5;E9PVC6;E9Q9E1;Q6NZJ6	Mus musculus	;;;behavioral fear response,translation,translational initiation,regulation of translational initiation,mitochondrion organization,positive regulation of cell proliferation,negative regulation of autophagy,negative regulation of peptidyl-threonine phosphorylation,positive regulation of cell death,positive regulation of cell growth,positive regulation of cellular protein metabolic process,positive…	;;;RNA binding,mRNA binding,translation initiation factor activity,protein binding,ATP binding,translation factor activity, RNA binding,eukaryotic initiation factor 4E binding,identical protein binding,cadherin binding	;;;nucleus,cytoplasm,polysome,membrane,eukaryotic translation initiation factor 4F complex	tr;tr;tr;sp	1	1	uniprot_mouse_proteome	>tr|E9PVC5|E9PVC5_MOUSE Eukaryotic translation initiation factor 4 gamma 1 OS=Mus musculus GN=Eif4g1 PE=1 SV=1;>tr|E9PVC6|E9PVC6_MOUSE Eukaryotic translation initiation factor 4 gamma 1 OS=Mus musculus GN=Eif4g1 PE=1 SV=1;>tr|E9Q9E1|E9Q9E1_MOUSE Eukaryotic translation initiation factor 4 gamma 1 OS=Mus musculus GN=Eif4g1 PE=1 SV=1;>sp|Q6NZJ6|IF4G1_MOUSE Eukaryotic translation initiation factor 4 …	30	35
TRUE	Old_Native / Young_Native	Old_Native	Young_Native	165	Q8CI94	2.4509e+06	1.95977e+06	-0.322633	0.322633	-20.0391	0.799609	0	2.57689e-10	4.02282e-09	164	0.0569216	Q8CI94	PYGB_MOUSE	Glycogen phosphorylase, brain form	Pygb	Q8CI94	Mus musculus	glycogen catabolic process	glycogen phosphorylase activity,pyridoxal phosphate binding,Requires Ontology	cytoplasm,membrane,axon,extracellular exosome	sp	1	3	uniprot_mouse_proteome	>sp|Q8CI94|PYGB_MOUSE Glycogen phosphorylase, brain form OS=Mus musculus GN=Pygb PE=1 SV=3	27	33
TRUE	Old_Native / Young_Native	Old_Native	Young_Native	185	Q91VI7	6098691	6.92612e+06	0.183548	0.183548	13.5673	1.13567	0	2.56187e-10	4.02282e-09	184	0.0431969	Q91VI7	RINI_MOUSE	Ribonuclease inhibitor	Rnh1	Q91VI7	Mus musculus	negative regulation of catalytic activity,regulation of angiogenesis	ribonuclease inhibitor activity	nucleoplasm,cytosol,angiogenin-PRI complex,extracellular exosome	sp	1	1	uniprot_mouse_proteome	>sp|Q91VI7|RINI_MOUSE Ribonuclease inhibitor OS=Mus musculus GN=Rnh1 PE=1 SV=1	26	37
TRUE	Old_Native / Young_Native	Old_Native	Young_Native	235	Q99PU5	9858488	8444110	-0.223421	0.223421	-14.3468	0.856532	0	2.85114e-10	4.42025e-09	234	0.0372886	Q99PU5	ACBG1_MOUSE	Long-chain-fatty-acid--CoA ligase ACSBG1	Acsbg1	Q99PU5	Mus musculus	very long-chain fatty acid metabolic process,long-chain fatty acid metabolic process,response to glucocorticoid	long-chain fatty acid-CoA ligase activity,ATP binding,very long-chain fatty acid-CoA ligase activity,decanoate--CoA ligase activity	cytoplasm,cytoplasmic vesicle,peroxisome,endoplasmic reticulum,Golgi apparatus	sp	1	1	uniprot_mouse_proteome	>sp|Q99PU5|ACBG1_MOUSE Long-chain-fatty-acid--CoA ligase ACSBG1 OS=Mus musculus GN=Acsbg1 PE=1 SV=1	29	47
TRUE	Old_Native / Young_Native	Old_Native	Young_Native	160	P10107	6.19232e+06	7642920	0.303643	0.303643	23.4257	1.23426	0	3.54375e-10	5.4564e-09	159	0.0638824	P10107	ANXA1_MOUSE	Annexin A1	Anxa1	P10107	Mus musculus	DNA strand renaturation,neutrophil homeostasis,adaptive immune response,monocyte chemotaxis,regulation of leukocyte migration,phagocytosis,muscle contraction,inflammatory response,signal transduction,cell surface receptor signaling pathway,G-protein coupled receptor signaling pathway, coupled to cyclic nucleotide second messenger,regulation of cell shape,response to X-ray,myoblast migration invol…	single-stranded DNA binding,single-stranded RNA binding,helicase activity,structural molecule activity,calcium ion binding,protein binding,calcium-dependent phospholipid binding,phospholipase A2 inhibitor activity,protein binding, bridging,double-stranded DNA-dependent ATPase activity,annealing helicase activity,protein homodimerization activity,calcium-dependent protein binding,cadherin binding …	cornified envelope,phagocytic cup,extracellular space,nucleus,nucleoplasm,cytoplasm,endosome,cytosol,plasma membrane,cell-cell adherens junction,focal adhesion,cell surface,basolateral plasma membrane,apical plasma membrane,lateral plasma membrane,extrinsic component of membrane,cytoplasmic vesicle membrane,extrinsic component of external side of plasma membrane,extrinsic component of endosome me…	sp	1	2	uniprot_mouse_proteome	>sp|P10107|ANXA1_MOUSE Annexin A1 OS=Mus musculus GN=Anxa1 PE=1 SV=2	22	32
TRUE	Old_Native / Young_Native	Old_Native	Young_Native	160	Q922D8	1547337	1.33145e+06	-0.216791	0.216791	-13.9523	0.860477	0	3.79415e-10	5.76492e-09	159	0.0329048	Q922D8	C1TC_MOUSE	C-1-tetrahydrofolate synthase, cytoplasmic	Mthfd1	Q922D8	Mus musculus	histidine biosynthetic process,neutrophil homeostasis,neural tube closure,purine nucleotide biosynthetic process,methionine metabolic process,one-carbon metabolic process,heart development,serine family amino acid metabolic process,serine family amino acid biosynthetic process,methionine biosynthetic process,purine nucleobase biosynthetic process,10-formyltetrahydrofolate biosynthetic process,tra…	formate-tetrahydrofolate ligase activity,methenyltetrahydrofolate cyclohydrolase activity,methylenetetrahydrofolate dehydrogenase (NAD+) activity,methylenetetrahydrofolate dehydrogenase (NADP+) activity,ATP binding	mitochondrion,cytosol,membrane,extracellular exosome	sp	1	4	uniprot_mouse_proteome	>sp|Q922D8|C1TC_MOUSE C-1-tetrahydrofolate synthase, cytoplasmic OS=Mus musculus GN=Mthfd1 PE=1 SV=4	31	32
TRUE	Old_Native / Young_Native	Old_Native	Young_Native	60	Q9WTQ5;Q9WTQ5-2	167703	124002	-0.435542	0.435542	-26.0584	0.739416	0	3.79541e-10	5.76492e-09	59	0.050383	Q9WTQ5;Q9WTQ5-2	AKA12_MOUSE	A-kinase anchor protein 12;Isoform 2 of A-kinase anchor protein 12	Akap12	Q9WTQ5;Q9WTQ5-2	Mus musculus	protein targeting,signal transduction,positive regulation of protein kinase A signaling,positive regulation of cAMP biosynthetic process,regulation of protein kinase C signaling;	adenylate cyclase binding,receptor signaling complex scaffold activity,protein kinase A binding;	cytosol,cytoskeleton,plasma membrane,focal adhesion;	sp	1;	1;	uniprot_mouse_proteome	>sp|Q9WTQ5|AKA12_MOUSE A-kinase anchor protein 12 OS=Mus musculus GN=Akap12 PE=1 SV=1;>sp|Q9WTQ5-2|AKA12_MOUSE Isoform 2 of A-kinase anchor protein 12 OS=Mus musculus GN=Akap12	12	12
TRUE	Old_Native / Young_Native	Old_Native	Young_Native	30	O89053	425058	644785	0.601157	0.601157	51.6933	1.51693	0	3.93162e-10	5.93173e-09	29	0.0613466	O89053	COR1A_MOUSE	Coronin-1A	Coro1a	O89053	Mus musculus	phagolysosome assembly,calcium ion transport,phagocytosis,actin filament organization,regulation of actin polymerization or depolymerization,regulation of cell shape,cell migration,actin cytoskeleton organization,positive regulation of cell migration,leukocyte chemotaxis,regulation of actin filament polymerization,negative regulation of vesicle fusion,cell-substrate adhesion,uropod organization,r…	RNA binding,actin binding,actin monomer binding,protein binding,protein C-terminus binding,cytoskeletal protein binding,myosin heavy chain binding,identical protein binding,protein homodimerization activity,phosphatidylinositol 3-kinase binding,actin filament binding	immunological synapse,phagocytic cup,cytoplasm,early endosome,cytosol,actin filament,plasma membrane,cell-cell junction,membrane,lamellipodium,axon,phagocytic vesicle membrane,cortical actin cytoskeleton,cell leading edge,protein complex,phagocytic vesicle,extracellular exosome,actin cytoskeleton	sp	1	5	uniprot_mouse_proteome	>sp|O89053|COR1A_MOUSE Coronin-1A OS=Mus musculus GN=Coro1a PE=1 SV=5	6	6
TRUE	Old_Native / Young_Native	Old_Native	Young_Native	55	P28654	1751556	3.44153e+06	0.974414	0.974414	96.4843	1.96484	0	4.69449e-10	7.03548e-09	54	0.129528	P28654	PGS2_MOUSE	Decorin	Dcn	P28654	Mus musculus	kidney development,placenta development,negative regulation of protein kinase activity,skeletal muscle tissue development,aging,response to mechanical stimulus,positive regulation of autophagy,negative regulation of endothelial cell migration,positive regulation of phosphatidylinositol 3-kinase signaling,positive regulation of macroautophagy,negative regulation of angiogenesis,cytokine-mediated s…	RNA binding,protein kinase inhibitor activity,collagen binding,glycosaminoglycan binding,protein N-terminus binding,extracellular matrix binding	proteinaceous extracellular matrix,collagen type VI trimer,extracellular space,cytoplasm,extracellular matrix	sp	1	1	uniprot_mouse_proteome	>sp|P28654|PGS2_MOUSE Decorin OS=Mus musculus GN=Dcn PE=1 SV=1	9	11
TRUE	Old_Native / Young_Native	Old_Native	Young_Native	125	P51125-6;Q8CE80	1207749	1.51622e+06	0.328161	0.328161	25.5412	1.25541	0	4.78155e-10	7.11849e-09	124	0.0924613	P51125-6;Q8CE80	ICAL_MOUSE;Q8CE80_MOUSE	Isoform 6 of Calpastatin;Calpastatin	Cast	P51125-6;Q8CE80	Mus musculus	;	;	;	sp;tr	;1	;1	uniprot_mouse_proteome	>sp|P51125-6|ICAL_MOUSE Isoform 6 of Calpastatin OS=Mus musculus GN=Cast;>tr|Q8CE80|Q8CE80_MOUSE Calpastatin OS=Mus musculus GN=Cast PE=1 SV=1	18	25
TRUE	Old_Native / Young_Native	Old_Native	Young_Native	105	E9PUM4;Q71LX4	338715	473260	0.48256	0.48256	39.7221	1.39722	0	5.5053e-10	8.14205e-09	104	0.0923464	E9PUM4;Q71LX4	E9PUM4_MOUSE;TLN2_MOUSE	Talin-2	Tln2	E9PUM4;Q71LX4	Mus musculus	;cytoskeletal anchoring at plasma membrane,cell adhesion	;structural constituent of cytoskeleton,protein binding,actin filament binding	;ruffle,cytoplasm,cytoskeleton,plasma membrane,fascia adherens,focal adhesion,synapse	tr;sp	1	1;3	uniprot_mouse_proteome	>tr|E9PUM4|E9PUM4_MOUSE Talin-2 OS=Mus musculus GN=Tln2 PE=1 SV=1;>sp|Q71LX4|TLN2_MOUSE Talin-2 OS=Mus musculus GN=Tln2 PE=1 SV=3	21	21
TRUE	Old_Native / Young_Native	Old_Native	Young_Native	40	Q9Z1T2	245591	94101	-1.38398	1.38398	-61.6839	0.383161	0	5.73231e-10	8.42237e-09	39	0.154456	Q9Z1T2	TSP4_MOUSE	Thrombospondin-4	Thbs4	Q9Z1T2	Mus musculus	positive regulation of endothelial cell proliferation,response to unfolded protein,regulation of receptor activity,negative regulation of angiogenesis,regulation of tissue remodeling,response to endoplasmic reticulum stress,behavioral response to pain,tissue remodeling,positive regulation of peptidyl-tyrosine phosphorylation,myoblast migration,positive regulation of cell division,endothelial cell…	integrin binding,calcium ion binding,protein binding,growth factor activity,heparin binding	basement membrane,extracellular space,endoplasmic reticulum,sarcoplasmic reticulum,extracellular matrix,extracellular exosome	sp	1	1	uniprot_mouse_proteome	>sp|Q9Z1T2|TSP4_MOUSE Thrombospondin-4 OS=Mus musculus GN=Thbs4 PE=1 SV=1	7	8
TRUE	Old_Native / Young_Native	Old_Native	Young_Native	185	E9Q3X0	1.38587e+06	1.79199e+06	0.370769	0.370769	29.3042	1.29304	0	6.16848e-10	9.00437e-09	184	0.0510538	E9Q3X0	E9Q3X0_MOUSE	Major vault protein	Mvp	E9Q3X0	Mus musculus				tr	1	1	uniprot_mouse_proteome	>tr|E9Q3X0|E9Q3X0_MOUSE Major vault protein OS=Mus musculus GN=Mvp PE=1 SV=1	32	37
TRUE	Old_Native / Young_Native	Old_Native	Young_Native	205	P97742	6245267	8661188	0.471802	0.471802	38.684	1.38684	0	6.2146e-10	9.01317e-09	204	0.0769413	P97742	CPT1A_MOUSE	Carnitine O-palmitoyltransferase 1, liver isoform	Cpt1a	P97742	Mus musculus	long-chain fatty acid metabolic process,glucose metabolic process,fatty acid beta-oxidation,triglyceride metabolic process,transport,circadian rhythm,carnitine metabolic process,response to organic cyclic compound,epithelial cell differentiation,positive regulation of fatty acid beta-oxidation,response to drug,eating behavior,regulation of insulin secretion,protein homooligomerization,cellular re…	carnitine O-palmitoyltransferase activity,identical protein binding,palmitoleoyltransferase activity	mitochondrion,mitochondrial outer membrane,mitochondrial inner membrane,membrane,integral component of mitochondrial outer membrane	sp	1	4	uniprot_mouse_proteome	>sp|P97742|CPT1A_MOUSE Carnitine O-palmitoyltransferase 1, liver isoform OS=Mus musculus GN=Cpt1a PE=1 SV=4	28	41
TRUE	Old_Native / Young_Native	Old_Native	Young_Native	55	E9Q3E2	417008	305125	-0.450675	0.450675	-26.83	0.7317	0	6.80201e-10	9.80187e-09	54	0.0759639	E9Q3E2	E9Q3E2_MOUSE	Synaptopodin	Synpo	E9Q3E2	Mus musculus				tr	1	1	uniprot_mouse_proteome	>tr|E9Q3E2|E9Q3E2_MOUSE Synaptopodin OS=Mus musculus GN=Synpo PE=1 SV=1	11	11
TRUE	Old_Native / Young_Native	Old_Native	Young_Native	155	O88342	3.94848e+06	4603258	0.221357	0.221357	16.5829	1.16583	0	7.63922e-10	1.09382e-08	154	0.0382735	O88342	WDR1_MOUSE	WD repeat-containing protein 1	Wdr1	O88342	Mus musculus	neutrophil mediated immunity,sensory perception of sound,regulation of cell shape,actin cytoskeleton organization,actin filament fragmentation,platelet formation,regulation of actin filament depolymerization,positive regulation of actin filament depolymerization,cortical cytoskeleton organization,establishment of planar polarity of follicular epithelium,apical junction assembly,maintenance of epi…	actin binding,actin filament binding	podosome,cytosol,cell-cell junction,actin cytoskeleton,cortical actin cytoskeleton,actomyosin, actin portion,cell projection,myelin sheath,extracellular exosome,actin filament	sp	1	3	uniprot_mouse_proteome	>sp|O88342|WDR1_MOUSE WD repeat-containing protein 1 OS=Mus musculus GN=Wdr1 PE=1 SV=3	23	31
TRUE	Old_Native / Young_Native	Old_Native	Young_Native	85	Q60634	890641	1.27222e+06	0.514437	0.514437	42.8436	1.42844	0	7.70123e-10	1.09572e-08	84	0.0840173	Q60634	FLOT2_MOUSE	Flotillin-2	Flot2	Q60634	Mus musculus	membrane raft assembly,cell adhesion,negative regulation of gene expression,protein localization to plasma membrane raft,regulation of myoblast differentiation,protein stabilization,protein localization to plasma membrane,negative regulation of amyloid precursor protein catabolic process,positive regulation of establishment of T cell polarity	protease binding,ionotropic glutamate receptor binding,protein heterodimerization activity	uropod,acrosomal membrane,endosome,plasma membrane,caveola,cell-cell adherens junction,focal adhesion,membrane,basolateral plasma membrane,flotillin complex,lamellipodium,endocytic vesicle,cytoplasmic vesicle,vesicle,cell-cell contact zone,membrane raft,perinuclear region of cytoplasm,extracellular exosome,cortical actin cytoskeleton	sp	1	2	uniprot_mouse_proteome	>sp|Q60634|FLOT2_MOUSE Flotillin-2 OS=Mus musculus GN=Flot2 PE=1 SV=2	16	17
TRUE	Old_Native / Young_Native	Old_Native	Young_Native	180	E9QA16;Q8VCQ8	5.26503e+06	4962640	-0.0853338	0.0853338	-5.74336	0.942566	0	8.03894e-10	1.13657e-08	179	0.0327759	E9QA16;Q8VCQ8	E9QA16_MOUSE;Q8VCQ8_MOUSE	Protein Cald1;Caldesmon 1	Cald1	E9QA16;Q8VCQ8	Mus musculus	;	;	;	tr	1	1	uniprot_mouse_proteome	>tr|E9QA16|E9QA16_MOUSE Protein Cald1 OS=Mus musculus GN=Cald1 PE=1 SV=1;>tr|Q8VCQ8|Q8VCQ8_MOUSE Caldesmon 1 OS=Mus musculus GN=Cald1 PE=1 SV=1	25	36
TRUE	Old_Native / Young_Native	Old_Native	Young_Native	65	P62242	9891634	8242030	-0.263209	0.263209	-16.6768	0.833232	0	8.33761e-10	1.17143e-08	64	0.0425182	P62242	RS8_MOUSE	40S ribosomal protein S8	Rps8	P62242	Mus musculus	maturation of SSU-rRNA from tricistronic rRNA transcript (SSU-rRNA, 5.8S rRNA, LSU-rRNA),translation	RNA binding,structural constituent of ribosome	nucleus,endoplasmic reticulum,cytosol,focal adhesion,membrane,cytosolic small ribosomal subunit,intracellular ribonucleoprotein complex,extracellular exosome	sp	1	2	uniprot_mouse_proteome	>sp|P62242|RS8_MOUSE 40S ribosomal protein S8 OS=Mus musculus GN=Rps8 PE=1 SV=2	10	13
TRUE	Old_Native / Young_Native	Old_Native	Young_Native	50	Q9D8U8	691313	846443	0.292074	0.292074	22.4399	1.2244	0	8.9149e-10	1.24476e-08	49	0.0392355	Q9D8U8	SNX5_MOUSE	Sorting nexin-5	Snx5	Q9D8U8	Mus musculus	intracellular protein transport,endocytosis,pinocytosis,vesicle organization,retrograde transport, endosome to Golgi	dynactin binding,phosphatidylinositol binding,cadherin binding	ruffle,phagocytic cup,endosome,cytosol,extrinsic component of membrane,cytoplasmic vesicle membrane,retromer complex,extrinsic component of cytoplasmic side of plasma membrane,extrinsic component of endosome membrane,macropinocytic cup,tubular endosome,early endosome membrane	sp	1	1	uniprot_mouse_proteome	>sp|Q9D8U8|SNX5_MOUSE Sorting nexin-5 OS=Mus musculus GN=Snx5 PE=1 SV=1	10	10
TRUE	Old_Native / Young_Native	Old_Native	Young_Native	150	Q60864	4.56661e+06	3.75281e+06	-0.283154	0.283154	-17.8208	0.821792	0	9.23464e-10	1.28145e-08	149	0.0415137	Q60864	STIP1_MOUSE	Stress-induced-phosphoprotein 1	Stip1	Q60864	Mus musculus		RNA binding,protein binding,protein C-terminus binding,Hsp70 protein binding,chaperone binding	nucleus,cytosol,myelin sheath,protein complex	sp	1	1	uniprot_mouse_proteome	>sp|Q60864|STIP1_MOUSE Stress-induced-phosphoprotein 1 OS=Mus musculus GN=Stip1 PE=1 SV=1	24	30
TRUE	Old_Native / Young_Native	Old_Native	Young_Native	90	Q8BK67	1555947	1.27548e+06	-0.286754	0.286754	-18.0255	0.819745	0	9.31984e-10	1.28534e-08	89	0.0543068	Q8BK67	RCC2_MOUSE	Protein RCC2	Rcc2	Q8BK67	Mus musculus	cell cycle,integrin-mediated signaling pathway,regulation of fibroblast migration,positive regulation of G2/M transition of mitotic cell cycle,regulation of cell migration,negative regulation of GTPase activity,establishment of protein localization,focal adhesion assembly,cell division,negative regulation of focal adhesion assembly,positive regulation of attachment of spindle microtubules to kine…	RNA binding,microtubule binding,protein kinase binding,protein domain specific binding,small GTPase binding,Rac GTPase binding	nucleus,nucleolus,microtubule,plasma membrane,midbody,early endosome membrane,chromosome, centromeric core domain,mitotic spindle midzone,membrane	sp	1	1	uniprot_mouse_proteome	>sp|Q8BK67|RCC2_MOUSE Protein RCC2 OS=Mus musculus GN=Rcc2 PE=1 SV=1	16	18
TRUE	Old_Native / Young_Native	Old_Native	Young_Native	185	Q8K010	1.41419e+06	1.59663e+06	0.175057	0.175057	12.9009	1.12901	0	1.01024e-09	1.38477e-08	184	0.0634432	Q8K010	OPLA_MOUSE	5-oxoprolinase	Oplah	Q8K010	Mus musculus	glutathione metabolic process	ATP binding,5-oxoprolinase (ATP-hydrolyzing) activity	cytosol	sp	1	1	uniprot_mouse_proteome	>sp|Q8K010|OPLA_MOUSE 5-oxoprolinase OS=Mus musculus GN=Oplah PE=1 SV=1	34	37
TRUE	Old_Native / Young_Native	Old_Native	Young_Native	105	O35350	472259	595502	0.334526	0.334526	26.0963	1.26096	0	1.14743e-09	1.56329e-08	104	0.0540485	O35350	CAN1_MOUSE	Calpain-1 catalytic subunit	Capn1	O35350	Mus musculus	proteolysis,receptor catabolic process,regulation of catalytic activity,mammary gland involution,self proteolysis	calcium-dependent cysteine-type endopeptidase activity,calcium ion binding,protein binding	mitochondrion,lysosome,cytosol,plasma membrane,focal adhesion,membrane,extracellular exosome	sp	1	1	uniprot_mouse_proteome	>sp|O35350|CAN1_MOUSE Calpain-1 catalytic subunit OS=Mus musculus GN=Capn1 PE=1 SV=1	19	21
TRUE	Old_Native / Young_Native	Old_Native	Young_Native	110	B2RXS4	440954	481101	0.125713	0.125713	9.10465	1.09105	0	1.1624e-09	1.57414e-08	109	0.0302973	B2RXS4	PLXB2_MOUSE	Plexin-B2	Plxnb2	B2RXS4	Mus musculus	neural tube closure,regulation of protein phosphorylation,homophilic cell adhesion via plasma membrane adhesion molecules,negative regulation of cell adhesion,neuroblast proliferation,brain development,regulation of cell shape,positive regulation of neuron projection development,regulation of GTPase activity,positive regulation of axonogenesis,semaphorin-plexin signaling pathway,regulation of neu…	protein binding,semaphorin receptor activity	integral component of plasma membrane,cell surface,extracellular exosome	sp	1	1	uniprot_mouse_proteome	>sp|B2RXS4|PLXB2_MOUSE Plexin-B2 OS=Mus musculus GN=Plxnb2 PE=1 SV=1	22	22
TRUE	Old_Native / Young_Native	Old_Native	Young_Native	65	P35486	2.00933e+06	2.28716e+06	0.186841	0.186841	13.8269	1.13827	0	1.17379e-09	1.58004e-08	64	0.0366207	P35486	ODPA_MOUSE	Pyruvate dehydrogenase E1 component subunit alpha, somatic form, mitochondrial	Pdha1	P35486	Mus musculus	glucose metabolic process,acetyl-CoA biosynthetic process from pyruvate,tricarboxylic acid cycle,mitochondrial acetyl-CoA biosynthetic process from pyruvate	pyruvate dehydrogenase activity,pyruvate dehydrogenase (acetyl-transferring) activity,pyruvate dehydrogenase (NAD+) activity	nucleus,nucleolus,mitochondrion,mitochondrial matrix,myelin sheath,pyruvate dehydrogenase complex	sp	1	1	uniprot_mouse_proteome	>sp|P35486|ODPA_MOUSE Pyruvate dehydrogenase E1 component subunit alpha, somatic form, mitochondrial OS=Mus musculus GN=Pdha1 PE=1 SV=1	12	13
TRUE	Old_Native / Young_Native	Old_Native	Young_Native	55	E9Q718;Q9R0B9	416793	252365	-0.723815	0.723815	-39.4506	0.605494	0	1.33377e-09	1.78471e-08	54	0.107427	E9Q718;Q9R0B9	E9Q718_MOUSE;PLOD2_MOUSE	Procollagen-lysine,2-oxoglutarate 5-dioxygenase 2;Procollagen-lysine,2-oxoglutarate 5-dioxygenase 2	Plod2	E9Q718;Q9R0B9	Mus musculus	;peptidyl-lysine hydroxylation,hydroxylysine biosynthetic process,oxidation-reduction process	;iron ion binding,procollagen-lysine 5-dioxygenase activity,L-ascorbic acid binding	;rough endoplasmic reticulum membrane,extracellular exosome	tr;sp	1	1;2	uniprot_mouse_proteome	>tr|E9Q718|E9Q718_MOUSE Procollagen-lysine,2-oxoglutarate 5-dioxygenase 2 OS=Mus musculus GN=Plod2 PE=1 SV=1;>sp|Q9R0B9|PLOD2_MOUSE Procollagen-lysine,2-oxoglutarate 5-dioxygenase 2 OS=Mus musculus GN=Plod2 PE=1 SV=2	10	11
TRUE	Old_Native / Young_Native	Old_Native	Young_Native	185	Q8BKC5	1.45778e+06	1.3192e+06	-0.144117	0.144117	-9.50671	0.904933	0	1.45695e-09	1.938e-08	184	0.0426641	Q8BKC5	IPO5_MOUSE	Importin-5	Ipo5	Q8BKC5	Mus musculus	protein import into nucleus, translocation,NLS-bearing protein import into nucleus,ribosomal protein import into nucleus,positive regulation of protein import into nucleus,cellular response to amino acid stimulus	RNA binding,protein binding,nuclear localization sequence binding,Ran GTPase binding,protein transporter activity	nucleus,cytoplasm,membrane,nuclear membrane,nuclear periphery	sp	1	3	uniprot_mouse_proteome	>sp|Q8BKC5|IPO5_MOUSE Importin-5 OS=Mus musculus GN=Ipo5 PE=1 SV=3	31	37
TRUE	Old_Native / Young_Native	Old_Native	Young_Native	75	O89020;O89020-3	424654	619512	0.544844	0.544844	45.8863	1.45886	0	1.55172e-09	2.03992e-08	74	0.0952075	O89020;O89020-3	AFAM_MOUSE	Afamin;Isoform 3 of Afamin	Afm	O89020;O89020-3	Mus musculus	vitamin transport;	vitamin E binding;	extracellular space,extracellular exosome,blood microparticle;	sp	1;	2;	uniprot_mouse_proteome	>sp|O89020|AFAM_MOUSE Afamin OS=Mus musculus GN=Afm PE=1 SV=2;>sp|O89020-3|AFAM_MOUSE Isoform 3 of Afamin OS=Mus musculus GN=Afm	13	15
TRUE	Old_Native / Young_Native	Old_Native	Young_Native	30	P11688	304358	406203	0.416428	0.416428	33.4619	1.33462	0	1.54972e-09	2.03992e-08	29	0.0526189	P11688	ITA5_MOUSE	Integrin alpha-5	Itga5	P11688	Mus musculus	cell-substrate junction assembly,heterophilic cell-cell adhesion via plasma membrane cell adhesion molecules,leukocyte cell-cell adhesion,integrin-mediated signaling pathway,memory,positive regulation of cell-substrate adhesion,positive regulation of cell migration,cell-substrate adhesion,cell adhesion mediated by integrin,cell-cell adhesion mediated by integrin,heterotypic cell-cell adhesion,wou…	epidermal growth factor receptor binding,integrin binding,protein binding,metal ion binding	endoplasmic reticulum,Golgi apparatus,plasma membrane,focal adhesion,integrin complex,external side of plasma membrane,cell surface,cytoplasmic vesicle,synapse,cell-cell junction,ruffle membrane	sp	1	3	uniprot_mouse_proteome	>sp|P11688|ITA5_MOUSE Integrin alpha-5 OS=Mus musculus GN=Itga5 PE=1 SV=3	6	6
TRUE	Old_Native / Young_Native	Old_Native	Young_Native	70	Q8K297	816928	617660	-0.403395	0.403395	-24.3923	0.756077	0	1.63128e-09	2.12462e-08	69	0.0520211	Q8K297	GT251_MOUSE	Procollagen galactosyltransferase 1	Colgalt1	Q8K297	Mus musculus	positive regulation of collagen fibril organization	procollagen galactosyltransferase activity	endoplasmic reticulum lumen,membrane	sp	1	2	uniprot_mouse_proteome	>sp|Q8K297|GT251_MOUSE Procollagen galactosyltransferase 1 OS=Mus musculus GN=Colgalt1 PE=1 SV=2	13	14
TRUE	Old_Native / Young_Native	Old_Native	Young_Native	55	O08807	1387944	1.03893e+06	-0.41785	0.41785	-25.1461	0.748539	0	1.63505e-09	2.12462e-08	54	0.0609089	O08807	PRDX4_MOUSE	Peroxiredoxin-4	Prdx4	O08807	Mus musculus	spermatogenesis,male gonad development,4-hydroxyproline metabolic process,protein maturation by protein folding,extracellular matrix organization,cell redox homeostasis,oxidation-reduction process,reactive oxygen species metabolic process,cellular oxidant detoxification,negative regulation of male germ cell proliferation	peroxidase activity,protein binding,protein homodimerization activity,peroxiredoxin activity	nucleus,cytoplasm,mitochondrion,endoplasmic reticulum,smooth endoplasmic reticulum,cytosol,extracellular exosome	sp	1	1	uniprot_mouse_proteome	>sp|O08807|PRDX4_MOUSE Peroxiredoxin-4 OS=Mus musculus GN=Prdx4 PE=1 SV=1	8	11
TRUE	Old_Native / Young_Native	Old_Native	Young_Native	105	P12970	7539854	6287748	-0.261993	0.261993	-16.6065	0.833935	0	1.73586e-09	2.22983e-08	104	0.0501043	P12970	RL7A_MOUSE	60S ribosomal protein L7a	Rpl7a	P12970	Mus musculus	maturation of LSU-rRNA,translation	RNA binding,protein binding,cadherin binding	nucleus,nucleolus,cytoplasm,focal adhesion,membrane,cytosolic large ribosomal subunit,polysomal ribosome,extracellular exosome	sp	1	2	uniprot_mouse_proteome	>sp|P12970|RL7A_MOUSE 60S ribosomal protein L7a OS=Mus musculus GN=Rpl7a PE=1 SV=2	16	21
TRUE	Old_Native / Young_Native	Old_Native	Young_Native	25	A0A075B5P2;P01837	533566	2.46003e+06	2.20494	2.20494	361.054	4.61054	0	1.72937e-09	2.22983e-08	24	0.196212	A0A075B5P2;P01837	A0A075B5P2_MOUSE;IGKC_MOUSE	Protein Igkc (Fragment);Ig kappa chain C region	Igkc;	A0A075B5P2;P01837	Mus musculus	;phagocytosis, recognition,phagocytosis, engulfment,complement activation, classical pathway,B cell differentiation,defense response to bacterium,innate immune response,B cell receptor signaling pathway,positive regulation of B cell activation	;antigen binding,immunoglobulin receptor binding	;plasma membrane,external side of plasma membrane,immunoglobulin complex, circulating,blood microparticle	tr;sp	1	1	uniprot_mouse_proteome	>tr|A0A075B5P2|A0A075B5P2_MOUSE Protein Igkc (Fragment) OS=Mus musculus GN=Igkc PE=1 SV=1;>sp|P01837|IGKC_MOUSE Ig kappa chain C region OS=Mus musculus PE=1 SV=1	3	5
TRUE	Old_Native / Young_Native	Old_Native	Young_Native	180	Q91ZA3	2.94708e+06	3.37388e+06	0.195121	0.195121	14.482	1.14482	0	1.85647e-09	2.37122e-08	179	0.03403	Q91ZA3	PCCA_MOUSE	Propionyl-CoA carboxylase alpha chain, mitochondrial	Pcca	Q91ZA3	Mus musculus		biotin carboxylase activity,propionyl-CoA carboxylase activity,ATP binding,enzyme binding,metal ion binding	mitochondrion,mitochondrial matrix	sp	1	2	uniprot_mouse_proteome	>sp|Q91ZA3|PCCA_MOUSE Propionyl-CoA carboxylase alpha chain, mitochondrial OS=Mus musculus GN=Pcca PE=1 SV=2	30	36
TRUE	Old_Native / Young_Native	Old_Native	Young_Native	85	A6X935;E9PVD2;E9Q5L2	1.0464e+06	1.42964e+06	0.450218	0.450218	36.6247	1.36625	0	1.93886e-09	2.46246e-08	84	0.0624694	A6X935;E9PVD2;E9Q5L2	ITIH4_MOUSE;E9PVD2_MOUSE;E9Q5L2_MOUSE	Inter alpha-trypsin inhibitor, heavy chain 4;Inter alpha-trypsin inhibitor, heavy chain 4;Inter alpha-trypsin inhibitor, heavy chain 4	Itih4	A6X935;E9PVD2;E9Q5L2	Mus musculus	acute-phase response,negative regulation of endopeptidase activity,hyaluronan metabolic process,response to cytokine;;	serine-type endopeptidase inhibitor activity,protein binding,calcium ion binding,hyaluronic acid binding;;	cytoplasm,plasma membrane,extracellular exosome,blood microparticle;;	sp;tr;tr	1	2;1;1	uniprot_mouse_proteome	>sp|A6X935|ITIH4_MOUSE Inter alpha-trypsin inhibitor, heavy chain 4 OS=Mus musculus GN=Itih4 PE=1 SV=2;>tr|E9PVD2|E9PVD2_MOUSE Inter alpha-trypsin inhibitor, heavy chain 4 OS=Mus musculus GN=Itih4 PE=1 SV=1;>tr|E9Q5L2|E9Q5L2_MOUSE Inter alpha-trypsin inhibitor, heavy chain 4 OS=Mus musculus GN=Itih4 PE=1 SV=1	16	17
TRUE	Old_Native / Young_Native	Old_Native	Young_Native	155	Q7TPV4	1595247	1.21397e+06	-0.394047	0.394047	-23.9008	0.760992	0	1.96991e-09	2.48314e-08	154	0.063559	Q7TPV4	MBB1A_MOUSE	Myb-binding protein 1A	Mybbp1a	Q7TPV4	Mus musculus	osteoblast differentiation,transcription, DNA-templated,nucleocytoplasmic transport,respiratory electron transport chain,circadian regulation of gene expression,cellular response to glucose starvation,negative regulation of transcription, DNA-templated,positive regulation of cell cycle arrest,DNA biosynthetic process,intrinsic apoptotic signaling pathway by p53 class mediator,positive regulation …	core promoter binding,transcription corepressor activity,RNA binding,DNA-directed DNA polymerase activity,protein binding,transcription factor binding,zinc ion binding,sequence-specific DNA binding	nucleus,nucleolus,cytoplasm,membrane,NLS-dependent protein nuclear import complex,intracellular membrane-bounded organelle	sp	1	2	uniprot_mouse_proteome	>sp|Q7TPV4|MBB1A_MOUSE Myb-binding protein 1A OS=Mus musculus GN=Mybbp1a PE=1 SV=2	30	31
TRUE	Old_Native / Young_Native	Old_Native	Young_Native	135	P28666	1.45337e+06	2.09127e+06	0.524978	0.524978	43.8912	1.43891	0	1.97724e-09	2.48314e-08	134	0.146655	P28666	MUG2_MOUSE	Murinoglobulin-2	Mug2	P28666	Mus musculus	negative regulation of endopeptidase activity	serine-type endopeptidase inhibitor activity	extracellular space	sp	1	2	uniprot_mouse_proteome	>sp|P28666|MUG2_MOUSE Murinoglobulin-2 OS=Mus musculus GN=Mug2 PE=1 SV=2	25	27
TRUE	Old_Native / Young_Native	Old_Native	Young_Native	165	Q8VIJ6	5766339	4952266	-0.219567	0.219567	-14.1177	0.858823	0	2.11614e-09	2.64282e-08	164	0.0458477	Q8VIJ6	SFPQ_MOUSE	Splicing factor, proline- and glutamine-rich	Sfpq	Q8VIJ6	Mus musculus	negative regulation of transcription from RNA polymerase II promoter,alternative mRNA splicing, via spliceosome,double-strand break repair via homologous recombination,activation of innate immune response,transcription, DNA-templated,cellular response to DNA damage stimulus,regulation of circadian rhythm,negative regulation of circadian rhythm,positive regulation of sister chromatid cohesion,nega…	transcription regulatory region sequence-specific DNA binding,RNA polymerase II distal enhancer sequence-specific DNA binding,core promoter binding,DNA binding,chromatin binding,RNA binding,protein binding,protein homodimerization activity,histone deacetylase binding,transcription regulatory region DNA binding	chromatin,nucleus,nucleoplasm,cytoplasm,nuclear matrix,nuclear speck,extracellular matrix,paraspeckles,RNA polymerase II transcription factor complex	sp	1	1	uniprot_mouse_proteome	>sp|Q8VIJ6|SFPQ_MOUSE Splicing factor, proline- and glutamine-rich OS=Mus musculus GN=Sfpq PE=1 SV=1	21	33
TRUE	Old_Native / Young_Native	Old_Native	Young_Native	105	P18242	13585147	20371252	0.584504	0.584504	49.9524	1.49952	0	2.13523e-09	2.65194e-08	104	0.0744209	P18242	CATD_MOUSE	Cathepsin D	Ctsd	P18242	Mus musculus	autophagosome assembly,proteolysis,protein catabolic process,epithelial tube branching involved in lung morphogenesis	aspartic-type endopeptidase activity,peptidase activity,hydrolase activity	extracellular space,mitochondrion,lysosome,melanosome,membrane raft,extracellular exosome,extracellular matrix	sp	1	1	uniprot_mouse_proteome	>sp|P18242|CATD_MOUSE Cathepsin D OS=Mus musculus GN=Ctsd PE=1 SV=1	11	21
TRUE	Old_Native / Young_Native	Old_Native	Young_Native	80	Q9D819	1.92314e+06	1.50343e+06	-0.355202	0.355202	-21.824	0.78176	0	2.20012e-09	2.71751e-08	79	0.062157	Q9D819	IPYR_MOUSE	Inorganic pyrophosphatase	Ppa1	Q9D819	Mus musculus	phosphate-containing compound metabolic process	magnesium ion binding,inorganic diphosphatase activity,pyrophosphatase activity	cytoplasm,extracellular exosome	sp	1	1	uniprot_mouse_proteome	>sp|Q9D819|IPYR_MOUSE Inorganic pyrophosphatase OS=Mus musculus GN=Ppa1 PE=1 SV=1	13	16
TRUE	Old_Native / Young_Native	Old_Native	Young_Native	135	P20239;Q3UX44	9948831	7.27964e+06	-0.450659	0.450659	-26.8292	0.731708	0	2.27907e-09	2.79964e-08	134	0.114855	P20239;Q3UX44	ZP2_MOUSE;Q3UX44_MOUSE	Zona pellucida sperm-binding protein 2	Zp2	P20239;Q3UX44	Mus musculus	binding of sperm to zona pellucida,prevention of polyspermy,manganese ion transport;	protein binding,acrosin binding,identical protein binding;	proteinaceous extracellular matrix,multivesicular body,endoplasmic reticulum,plasma membrane,integral component of membrane,extracellular matrix,Golgi apparatus,secretory granule;	sp;tr	1	1	uniprot_mouse_proteome	>sp|P20239|ZP2_MOUSE Zona pellucida sperm-binding protein 2 OS=Mus musculus GN=Zp2 PE=1 SV=1;>tr|Q3UX44|Q3UX44_MOUSE Zona pellucida sperm-binding protein 2 OS=Mus musculus GN=Zp2 PE=1 SV=1	20	27
TRUE	Old_Native / Young_Native	Old_Native	Young_Native	55	P16015	666593	1.20307e+06	0.851839	0.851839	80.48	1.8048	0	2.40519e-09	2.93852e-08	54	0.236263	P16015	CAH3_MOUSE	Carbonic anhydrase 3	Ca3	P16015	Mus musculus	one-carbon metabolic process,response to oxidative stress,dephosphorylation,response to ethanol	carbonate dehydratase activity,zinc ion binding,nickel cation binding,phosphatase activity	cytosol	sp	1	3	uniprot_mouse_proteome	>sp|P16015|CAH3_MOUSE Carbonic anhydrase 3 OS=Mus musculus GN=Ca3 PE=1 SV=3	9	11
TRUE	Old_Native / Young_Native	Old_Native	Young_Native	60	P23492;Q543K9	1.1592e+06	1.31809e+06	0.185321	0.185321	13.707	1.13707	0	3.30525e-09	4.01633e-08	59	0.0302346	P23492;Q543K9	PNPH_MOUSE;Q543K9_MOUSE	Purine nucleoside phosphorylase	Pnp	P23492;Q543K9	Mus musculus	positive regulation of T cell mediated cytotoxicity,inosine catabolic process,deoxyinosine catabolic process,deoxyguanosine catabolic process,GTP biosynthetic process,intrinsic apoptotic signaling pathway in response to DNA damage,apoptotic mitochondrial changes,response to gamma radiation,urate biosynthetic process,positive regulation of T cell proliferation,purine nucleoside metabolic process,p…	nucleoside binding,purine nucleobase binding,purine-nucleoside phosphorylase activity,drug binding,phosphate ion binding;	intracellular,cytoplasm,cytosol,cytoskeleton,extracellular exosome;	sp;tr	1	2;1	uniprot_mouse_proteome	>sp|P23492|PNPH_MOUSE Purine nucleoside phosphorylase OS=Mus musculus GN=Pnp PE=1 SV=2;>tr|Q543K9|Q543K9_MOUSE Purine nucleoside phosphorylase OS=Mus musculus GN=Pnp PE=1 SV=1	10	12
TRUE	Old_Native / Young_Native	Old_Native	Young_Native	195	P11983	3.06752e+06	2.84135e+06	-0.110499	0.110499	-7.37321	0.926268	0	3.62958e-09	4.38672e-08	194	0.0474776	P11983	TCPA_MOUSE	T-complex protein 1 subunit alpha	Tcp1	P11983	Mus musculus	'de novo' protein folding,binding of sperm to zona pellucida,positive regulation of telomere maintenance via telomerase,translocation of peptides or proteins into host cell cytoplasm,protein stabilization,positive regulation of telomerase activity,chaperone-mediated protein folding,scaRNA localization to Cajal body,toxin transport,positive regulation of establishment of protein localization to te…	RNA binding,protein binding,ATP binding,ubiquitin protein ligase binding,protein binding involved in protein folding,unfolded protein binding	pericentriolar material,acrosomal vesicle,zona pellucida receptor complex,nuclear heterochromatin,Golgi apparatus,centrosome,microtubule organizing center,chaperonin-containing T-complex,microtubule,myelin sheath,cell body,extracellular exosome	sp	1	3	uniprot_mouse_proteome	>sp|P11983|TCPA_MOUSE T-complex protein 1 subunit alpha OS=Mus musculus GN=Tcp1 PE=1 SV=3	27	39
TRUE	Old_Native / Young_Native	Old_Native	Young_Native	30	A0A0A0MQM7;O08746;O08746-2	78333.9	144002	0.878384	0.878384	83.8314	1.83831	0	3.66357e-09	4.40412e-08	29	0.115454	A0A0A0MQM7;O08746;O08746-2	A0A0A0MQM7_MOUSE;MATN2_MOUSE;MATN2_MOUSE	Matrilin-2;Matrilin-2;Isoform 2 of Matrilin-2	Matn2	A0A0A0MQM7;O08746;O08746-2	Mus musculus	;neuron migration,axon guidance,glial cell migration,dendrite regeneration,neuron projection development,response to axon injury;	;calcium ion binding;	;proteinaceous extracellular matrix,basement membrane,extracellular space,extracellular matrix;	tr;sp;sp	1;2;	1;2;	uniprot_mouse_proteome	>tr|A0A0A0MQM7|A0A0A0MQM7_MOUSE Matrilin-2 OS=Mus musculus GN=Matn2 PE=1 SV=1;>sp|O08746|MATN2_MOUSE Matrilin-2 OS=Mus musculus GN=Matn2 PE=2 SV=2;>sp|O08746-2|MATN2_MOUSE Isoform 2 of Matrilin-2 OS=Mus musculus GN=Matn2	6	6
TRUE	Old_Native / Young_Native	Old_Native	Young_Native	100	P19221	929537	1.07592e+06	0.210992	0.210992	15.7484	1.15748	0	3.92171e-09	4.68937e-08	99	0.0543489	P19221	THRB_MOUSE	Prothrombin	F2	P19221	Mus musculus	positive regulation of protein phosphorylation,proteolysis,acute-phase response,cell surface receptor signaling pathway,positive regulation of cell proliferation,regulation of cell shape,response to wounding,regulation of gene expression,positive regulation of phosphatidylinositol 3-kinase signaling,platelet activation,positive regulation of blood coagulation,positive regulation of cell growth,po…	lipopolysaccharide binding,serine-type endopeptidase activity,receptor binding,calcium ion binding,protein binding,heparin binding,peptidase activity,thrombospondin receptor activity	extracellular space,extracellular exosome,blood microparticle,external side of plasma membrane	sp	1	1	uniprot_mouse_proteome	>sp|P19221|THRB_MOUSE Prothrombin OS=Mus musculus GN=F2 PE=1 SV=1	20	20
TRUE	Old_Native / Young_Native	Old_Native	Young_Native	45	A3KFU5;A3KFU8;D3Z5M2;Q6PHQ9;Q91YZ8	576452	437458	-0.398056	0.398056	-24.112	0.75888	0	4.06609e-09	4.83627e-08	44	0.0629904	A3KFU5;A3KFU8;D3Z5M2;Q6PHQ9;Q91YZ8	A3KFU5_MOUSE;A3KFU8_MOUSE;D3Z5M2_MOUSE;Q6PHQ9_MOUSE;Q91YZ8_MOUSE	Polyadenylate-binding protein	Pabpc4;Pabpc4;Gm10110;Pabpc4;Pabpc4	A3KFU5;A3KFU8;D3Z5M2;Q6PHQ9;Q91YZ8	Mus musculus	;;biological_process;regulation of mRNA stability,myeloid cell development;	;;molecular_function,RNA binding;RNA binding,mRNA binding,poly(A) binding,poly(U) RNA binding,poly(C) RNA binding;	;;cellular_component,cytoplasm;nucleus,cytoplasm,cytosol,cytoplasmic stress granule,intracellular ribonucleoprotein complex;	tr	1;1;3;1;1	1	uniprot_mouse_proteome	>tr|A3KFU5|A3KFU5_MOUSE Polyadenylate-binding protein OS=Mus musculus GN=Pabpc4 PE=1 SV=1;>tr|A3KFU8|A3KFU8_MOUSE Polyadenylate-binding protein OS=Mus musculus GN=Pabpc4 PE=1 SV=1;>tr|D3Z5M2|D3Z5M2_MOUSE Polyadenylate-binding protein OS=Mus musculus GN=Gm10110 PE=3 SV=1;>tr|Q6PHQ9|Q6PHQ9_MOUSE Polyadenylate-binding protein OS=Mus musculus GN=Pabpc4 PE=1 SV=1;>tr|Q91YZ8|Q91YZ8_MOUSE Polyadenylate-…	9	9
TRUE	Old_Native / Young_Native	Old_Native	Young_Native	90	P61222	927934	828346	-0.16379	0.16379	-10.7323	0.892677	0	4.26551e-09	5.04677e-08	89	0.0402207	P61222	ABCE1_MOUSE	ATP-binding cassette sub-family E member 1	Abce1	P61222	Mus musculus	ribosomal subunit export from nucleus,translational initiation,translational termination,negative regulation of endoribonuclease activity	iron ion binding,ATP binding,ATPase activity,ribosomal small subunit binding,endoribonuclease inhibitor activity	cytoplasm,mitochondrion,cytosol,membrane,eukaryotic translation initiation factor 3 complex	sp	1	1	uniprot_mouse_proteome	>sp|P61222|ABCE1_MOUSE ATP-binding cassette sub-family E member 1 OS=Mus musculus GN=Abce1 PE=1 SV=1	17	18
TRUE	Old_Native / Young_Native	Old_Native	Young_Native	740	B7FAU9;Q8BTM8	8462006	7734181	-0.129751	0.129751	-8.60109	0.913989	0	4.37989e-09	5.13113e-08	739	0.0277591	B7FAU9;Q8BTM8	B7FAU9_MOUSE;FLNA_MOUSE	Filamin, alpha;Filamin-A	Flna	B7FAU9;Q8BTM8	Mus musculus	;angiogenesis,epithelial to mesenchymal transition,blood vessel remodeling,heart morphogenesis,adenylate cyclase-inhibiting dopamine receptor signaling pathway,negative regulation of neuron projection development,negative regulation of transcription from RNA polymerase I promoter,actin cytoskeleton organization,regulation of cell migration,actin cytoskeleton reorganization,regulation of actin fil…	;G-protein coupled receptor binding,RNA binding,actin binding,signal transducer activity,protein kinase C binding,protein binding,transcription factor binding,potassium channel regulator activity,Rho GTPase binding,Ral GTPase binding,kinase binding,small GTPase binding,Fc-gamma receptor I complex binding,protein homodimerization activity,ion channel binding,cadherin binding,Rac GTPase binding,act…	;nucleus,nucleolus,cytoplasm,trans-Golgi network,cytosol,plasma membrane,brush border,cell-cell junction,focal adhesion,cell cortex,actin cytoskeleton,membrane,Z disc,growth cone,extracellular matrix,Myb complex,actin filament bundle,extracellular exosome,filamentous actin	tr;sp	1	1;5	uniprot_mouse_proteome	>tr|B7FAU9|B7FAU9_MOUSE Filamin, alpha OS=Mus musculus GN=Flna PE=1 SV=1;>sp|Q8BTM8|FLNA_MOUSE Filamin-A OS=Mus musculus GN=Flna PE=1 SV=5	107	148
TRUE	Old_Native / Young_Native	Old_Native	Young_Native	105	P25444	9410356	8312554	-0.178957	0.178957	-11.6659	0.883341	0	4.38246e-09	5.13113e-08	104	0.0463317	P25444	RS2_MOUSE	40S ribosomal protein S2	Rps2	P25444	Mus musculus	translation,cellular response to interleukin-4	RNA binding,mRNA binding,structural constituent of ribosome,fibroblast growth factor binding,enzyme binding,cadherin binding	nucleus,nucleoplasm,focal adhesion,membrane,cytosolic small ribosomal subunit,extracellular exosome	sp	1	3	uniprot_mouse_proteome	>sp|P25444|RS2_MOUSE 40S ribosomal protein S2 OS=Mus musculus GN=Rps2 PE=1 SV=3	14	21
TRUE	Old_Native / Young_Native	Old_Native	Young_Native	55	D3YTN4	766330	1.01198e+06	0.401137	0.401137	32.0548	1.32055	0	4.56818e-09	5.32086e-08	54	0.0630337	D3YTN4	D3YTN4_MOUSE	GTPase IMAP family member 4	Gimap4	D3YTN4	Mus musculus				tr	1	1	uniprot_mouse_proteome	>tr|D3YTN4|D3YTN4_MOUSE GTPase IMAP family member 4 OS=Mus musculus GN=Gimap4 PE=1 SV=1	11	11
TRUE	Old_Native / Young_Native	Old_Native	Young_Native	155	Q9CQF9	5.42736e+06	7175133	0.402756	0.402756	32.2031	1.32203	0	4.93744e-09	5.72132e-08	154	0.0690661	Q9CQF9	PCYOX_MOUSE	Prenylcysteine oxidase	Pcyox1	Q9CQF9	Mus musculus	prenylated protein catabolic process,prenylcysteine catabolic process,oxidation-reduction process,Requires Ontology,chloride transmembrane transport	prenylcysteine oxidase activity,chloride-transporting ATPase activity	lysosome,vacuolar membrane,plasma membrane,very-low-density lipoprotein particle,extracellular exosome	sp	1	1	uniprot_mouse_proteome	>sp|Q9CQF9|PCYOX_MOUSE Prenylcysteine oxidase OS=Mus musculus GN=Pcyox1 PE=1 SV=1	18	31
TRUE	Old_Native / Young_Native	Old_Native	Young_Native	45	P49717	324322	144694	-1.16442	1.16442	-55.3857	0.446143	0	5.02871e-09	5.7972e-08	44	0.192566	P49717	MCM4_MOUSE	DNA replication licensing factor MCM4	Mcm4	P49717	Mus musculus	DNA unwinding involved in DNA replication,DNA replication initiation,cell cycle	single-stranded DNA binding,protein binding,ATP binding,DNA helicase activity,ATP-dependent DNA helicase activity	nuclear chromosome, telomeric region,nucleoplasm,membrane,MCM complex	sp	1	1	uniprot_mouse_proteome	>sp|P49717|MCM4_MOUSE DNA replication licensing factor MCM4 OS=Mus musculus GN=Mcm4 PE=1 SV=1	9	9
TRUE	Old_Native / Young_Native	Old_Native	Young_Native	130	Q99MN9	2.63099e+06	3229146	0.295545	0.295545	22.7348	1.22735	0	5.18999e-09	5.9526e-08	129	0.0445324	Q99MN9	PCCB_MOUSE	Propionyl-CoA carboxylase beta chain, mitochondrial	Pccb	Q99MN9	Mus musculus	fatty acid catabolic process	propionyl-CoA carboxylase activity,ATP binding,CoA carboxylase activity	mitochondrion,mitochondrial matrix	sp	1	2	uniprot_mouse_proteome	>sp|Q99MN9|PCCB_MOUSE Propionyl-CoA carboxylase beta chain, mitochondrial OS=Mus musculus GN=Pccb PE=1 SV=2	22	26
TRUE	Old_Native / Young_Native	Old_Native	Young_Native	70	Q640N1	698356	916114	0.391563	0.391563	31.1814	1.31181	0	5.82212e-09	6.64372e-08	69	0.0583402	Q640N1	AEBP1_MOUSE	Adipocyte enhancer-binding protein 1	Aebp1	Q640N1	Mus musculus	negative regulation of transcription from RNA polymerase II promoter,transcription, DNA-templated,regulation of transcription, DNA-templated,peptide metabolic process,protein processing	RNA polymerase II regulatory region sequence-specific DNA binding,transcriptional repressor activity, RNA polymerase II transcription regulatory region sequence-specific binding,transcription corepressor activity,carboxypeptidase activity,metallocarboxypeptidase activity,serine-type carboxypeptidase activity,calmodulin binding,zinc ion binding	extracellular space,nucleus,cytoplasm,extracellular exosome,extracellular matrix	sp	1	1	uniprot_mouse_proteome	>sp|Q640N1|AEBP1_MOUSE Adipocyte enhancer-binding protein 1 OS=Mus musculus GN=Aebp1 PE=1 SV=1	13	14
TRUE	Old_Native / Young_Native	Old_Native	Young_Native	75	Q61503	263456	727060	1.46451	1.46451	175.97	2.7597	0	6.31534e-09	7.17015e-08	74	0.298066	Q61503	5NTD_MOUSE	5'-nucleotidase	Nt5e	Q61503	Mus musculus	AMP catabolic process,leukocyte cell-cell adhesion,dephosphorylation,adenosine biosynthetic process,negative regulation of inflammatory response	nucleotide binding,5'-nucleotidase activity,metal ion binding	cytosol,plasma membrane,cell surface,membrane,anchored component of membrane,extracellular exosome	sp	1	2	uniprot_mouse_proteome	>sp|Q61503|5NTD_MOUSE 5'-nucleotidase OS=Mus musculus GN=Nt5e PE=1 SV=2	13	15
TRUE	Old_Native / Young_Native	Old_Native	Young_Native	75	Q8CDN6	2929903	2.32594e+06	-0.333041	0.333041	-20.6139	0.793861	0	7.00583e-09	7.91412e-08	74	0.0634087	Q8CDN6	TXNL1_MOUSE	Thioredoxin-like protein 1	Txnl1	Q8CDN6	Mus musculus	cellular response to oxidative stress,cell redox homeostasis,oxidation-reduction process,cellular oxidant detoxification	thioredoxin-disulfide reductase activity,protein disulfide oxidoreductase activity,disulfide oxidoreductase activity,oxidoreductase activity, acting on a sulfur group of donors, disulfide as acceptor,protein-disulfide reductase activity	proteasome complex,nucleus,cytoplasm,cytosol,extracellular exosome	sp	1	3	uniprot_mouse_proteome	>sp|Q8CDN6|TXNL1_MOUSE Thioredoxin-like protein 1 OS=Mus musculus GN=Txnl1 PE=1 SV=3	11	15
TRUE	Old_Native / Young_Native	Old_Native	Young_Native	25	Q07456	455506	703866	0.627831	0.627831	54.524	1.54524	0	7.38509e-09	8.30084e-08	24	0.0788703	Q07456	AMBP_MOUSE	Protein AMBP	Ambp	Q07456	Mus musculus	negative regulation of endopeptidase activity,protein-chromophore linkage,protein catabolic process,protein maturation	serine-type endopeptidase inhibitor activity,IgA binding,heme binding,small molecule binding,protein homodimerization activity	extracellular space,plasma membrane,cell surface,extracellular matrix,intracellular membrane-bounded organelle,extracellular exosome,blood microparticle	sp	1	2	uniprot_mouse_proteome	>sp|Q07456|AMBP_MOUSE Protein AMBP OS=Mus musculus GN=Ambp PE=1 SV=2	5	5
TRUE	Old_Native / Young_Native	Old_Native	Young_Native	265	P07356	28551664	40839504	0.516391	0.516391	43.0372	1.43037	0	7.6151e-09	8.51679e-08	264	0.0897818	P07356	ANXA2_MOUSE	Annexin A2	Anxa2	P07356	Mus musculus	angiogenesis,membrane raft assembly,positive regulation of receptor recycling,positive regulation of protein phosphorylation,membrane budding,muscle contraction,body fluid secretion,collagen fibril organization,positive regulation of vesicle fusion,negative regulation of low-density lipoprotein particle receptor catabolic process,osteoclast development,fibrinolysis,negative regulation of catalyti…	protease binding,RNA binding,calcium ion binding,protein binding,calcium-dependent phospholipid binding,phosphatidylinositol-4,5-bisphosphate binding,cytoskeletal protein binding,Rab GTPase binding,phospholipase A2 inhibitor activity,identical protein binding,S100 protein binding,bone sialoprotein binding,calcium-dependent protein binding,cadherin binding involved in cell-cell adhesion,receptor a…	ruffle,basement membrane,extracellular space,nucleus,cytoplasm,lysosomal membrane,endosome,early endosome,lipid particle,cytosol,plasma membrane,cell-cell adherens junction,cell cortex,cell surface,membrane,basolateral plasma membrane,extrinsic component of plasma membrane,midbody,extracellular matrix,late endosome membrane,vesicle,myelin sheath adaxonal region,sarcolemma,melanosome,Schmidt-Lante…	sp	1	2	uniprot_mouse_proteome	>sp|P07356|ANXA2_MOUSE Annexin A2 OS=Mus musculus GN=Anxa2 PE=1 SV=2	30	53
TRUE	Old_Native / Young_Native	Old_Native	Young_Native	90	P23242	2.61725e+06	2054460	-0.349295	0.349295	-21.5032	0.784968	0	8.00506e-09	8.9086e-08	89	0.0809989	P23242	CXA1_MOUSE	Gap junction alpha-1 protein	Gja1	P23242	Mus musculus	osteoblast differentiation,in utero embryonic development,neuron migration,negative regulation of endothelial cell proliferation,heart looping,epithelial cell maturation,lens development in camera-type eye,chronic inflammatory response,response to ischemia,positive regulation of glomerular filtration,endothelium development,atrial ventricular junction remodeling,epicardial cell to mesenchymal cel…	signal transducer activity,receptor binding,gap junction channel activity,protein binding,ion transmembrane transporter activity,SH3 domain binding,PDZ domain binding,beta-tubulin binding,connexin binding,gap junction channel activity involved in cardiac conduction electrical coupling,scaffold protein binding,disordered domain specific binding,gap junction channel activity involved in cell commun…	cytoplasm,mitochondrion,mitochondrial outer membrane,lysosome,early endosome,multivesicular body,endoplasmic reticulum,Golgi apparatus,cytosol,intermediate filament,plasma membrane,cell-cell junction,fascia adherens,gap junction,connexin complex,focal adhesion,intercalated disc,membrane,integral component of membrane,apical plasma membrane,lateral plasma membrane,cell junction,contractile fiber,m…	sp	1	2	uniprot_mouse_proteome	>sp|P23242|CXA1_MOUSE Gap junction alpha-1 protein OS=Mus musculus GN=Gja1 PE=1 SV=2	11	18
TRUE	Old_Native / Young_Native	Old_Native	Young_Native	75	Q9R0X4	726920	889866	0.291793	0.291793	22.4161	1.22416	0	8.11171e-09	8.98282e-08	74	0.0427928	Q9R0X4	ACOT9_MOUSE	Acyl-coenzyme A thioesterase 9, mitochondrial	Acot9	Q9R0X4	Mus musculus	acyl-CoA metabolic process	acetyl-CoA hydrolase activity,protein binding,acyl-CoA hydrolase activity,carboxylic ester hydrolase activity	mitochondrion	sp	1	1	uniprot_mouse_proteome	>sp|Q9R0X4|ACOT9_MOUSE Acyl-coenzyme A thioesterase 9, mitochondrial OS=Mus musculus GN=Acot9 PE=1 SV=1	12	15
TRUE	Old_Native / Young_Native	Old_Native	Young_Native	50	Q9R069	309904	421049	0.442165	0.442165	35.8642	1.35864	0	8.40232e-09	9.25903e-08	49	0.0690044	Q9R069	BCAM_MOUSE	Basal cell adhesion molecule	Bcam	Q9R069	Mus musculus	cell adhesion,cell-matrix adhesion	laminin receptor activity,protein C-terminus binding,laminin binding	plasma membrane,integral component of plasma membrane,cell surface,extracellular matrix,extracellular exosome	sp	1	1	uniprot_mouse_proteome	>sp|Q9R069|BCAM_MOUSE Basal cell adhesion molecule OS=Mus musculus GN=Bcam PE=1 SV=1	9	10
TRUE	Old_Native / Young_Native	Old_Native	Young_Native	185	P70168	2.2784e+06	2.04093e+06	-0.158793	0.158793	-10.4226	0.895774	0	8.68077e-09	9.5192e-08	184	0.0451815	P70168	IMB1_MOUSE	Importin subunit beta-1	Kpnb1	P70168	Mus musculus	protein import into nucleus, translocation,protein import into nucleus,NLS-bearing protein import into nucleus,ribosomal protein import into nucleus,mitotic chromosome movement towards spindle pole,mitotic metaphase plate congression,astral microtubule organization,Ran protein signal transduction,establishment of mitotic spindle localization,establishment of protein localization,mitotic spindle a…	RNA binding,protein binding,nuclear localization sequence binding,Ran GTPase binding,protein transporter activity,enzyme binding,protein domain specific binding,Hsp90 protein binding	nuclear envelope,nucleoplasm,cytoplasm,cytosol,membrane,nuclear membrane,nuclear periphery,protein complex,extracellular exosome,endoplasmic reticulum tubular network	sp	1	2	uniprot_mouse_proteome	>sp|P70168|IMB1_MOUSE Importin subunit beta-1 OS=Mus musculus GN=Kpnb1 PE=1 SV=2	28	37
TRUE	Old_Native / Young_Native	Old_Native	Young_Native	55	H7BX88;P47934	338915	403240	0.250715	0.250715	18.9797	1.1898	0	8.99562e-09	9.81658e-08	54	0.045595	H7BX88;P47934	H7BX88_MOUSE;CACP_MOUSE	Carnitine O-acetyltransferase	Crat	H7BX88;P47934	Mus musculus	;fatty acid metabolic process,transport,carnitine metabolic process, CoA-linked	;carnitine O-acetyltransferase activity,receptor binding	;mitochondrion,mitochondrial inner membrane,peroxisome,endoplasmic reticulum	tr;sp	1	1;3	uniprot_mouse_proteome	>tr|H7BX88|H7BX88_MOUSE Carnitine O-acetyltransferase OS=Mus musculus GN=Crat PE=1 SV=1;>sp|P47934|CACP_MOUSE Carnitine O-acetyltransferase OS=Mus musculus GN=Crat PE=1 SV=3	11	11
TRUE	Old_Native / Young_Native	Old_Native	Young_Native	65	Q61009	4326786	6.423e+06	0.569951	0.569951	48.4473	1.48447	0	9.99272e-09	1.0852e-07	64	0.0948357	Q61009	SCRB1_MOUSE	Scavenger receptor class B member 1	Scarb1	Q61009	Mus musculus	endothelial cell proliferation,androgen biosynthetic process,cholesterol catabolic process,receptor-mediated endocytosis,positive regulation of triglyceride biosynthetic process,positive regulation of cholesterol storage,regulation of phosphatidylcholine catabolic process,phospholipid transport,lipopolysaccharide transport,cholesterol transport,lipopolysaccharide-mediated signaling pathway,detect…	lipopolysaccharide binding,beta-amyloid binding,phosphatidylserine binding,lipopolysaccharide receptor activity,high-density lipoprotein particle binding,low-density lipoprotein particle binding,apolipoprotein binding,apolipoprotein A-I binding,protein homodimerization activity,high-density lipoprotein particle receptor activity	cytoplasm,lysosomal membrane,plasma membrane,integral component of plasma membrane,caveola,cell surface,integral component of membrane,microvillus membrane,intracellular membrane-bounded organelle,extracellular exosome	sp	1	1	uniprot_mouse_proteome	>sp|Q61009|SCRB1_MOUSE Scavenger receptor class B member 1 OS=Mus musculus GN=Scarb1 PE=1 SV=1	8	13
TRUE	Old_Native / Young_Native	Old_Native	Young_Native	85	A0A0R4J0K2;A2AGT5;A2AGT5-2;A2AGT5-3;K3W4R5;Z4YL78	351828	300277	-0.228577	0.228577	-14.6524	0.853476	0	1.03789e-08	1.12172e-07	84	0.0601433	A0A0R4J0K2;A2AGT5;A2AGT5-2;A2AGT5-3;K3W4R5;Z4YL78	A0A0R4J0K2_MOUSE;CKAP5_MOUSE;CKAP5_MOUSE;CKAP5_MOUSE;K3W4R5_MOUSE;Z4YL78_MOUSE	Cytoskeleton-associated protein 5;Cytoskeleton-associated protein 5;Isoform 2 of Cytoskeleton-associated protein 5;Isoform 3 of Cytoskeleton-associated protein 5;Cytoskeleton-associated protein 5;Cytoskeleton-associated protein 5	Ckap5	A0A0R4J0K2;A2AGT5;A2AGT5-2;A2AGT5-3;K3W4R5;Z4YL78	Mus musculus	;spindle organization,centrosome cycle,establishment or maintenance of microtubule cytoskeleton polarity,microtubule polymerization,RNA transport,centrosome duplication,cell division;;;;	;microtubule binding,ribonucleoprotein complex binding,cadherin binding,microtubule plus-end binding;;;;	;kinetochore,condensed chromosome kinetochore,spindle pole,cytoplasm,centrosome,membrane,protein complex,gamma-tubulin complex,microtubule cytoskeleton,microtubule plus-end;;;;	tr;sp;sp;sp;tr;tr	1;1;;;1;1	1;1;;;1;1	uniprot_mouse_proteome	>tr|A0A0R4J0K2|A0A0R4J0K2_MOUSE Cytoskeleton-associated protein 5 OS=Mus musculus GN=Ckap5 PE=1 SV=1;>sp|A2AGT5|CKAP5_MOUSE Cytoskeleton-associated protein 5 OS=Mus musculus GN=Ckap5 PE=1 SV=1;>sp|A2AGT5-2|CKAP5_MOUSE Isoform 2 of Cytoskeleton-associated protein 5 OS=Mus musculus GN=Ckap5;>sp|A2AGT5-3|CKAP5_MOUSE Isoform 3 of Cytoskeleton-associated protein 5 OS=Mus musculus GN=Ckap5;>tr|K3W4R5|K…	17	17
TRUE	Old_Native / Young_Native	Old_Native	Young_Native	70	Q3UE92	950887	870808	-0.12692	0.12692	-8.42157	0.915784	0	1.04344e-08	1.12232e-07	69	0.0270817	Q3UE92	Q3UE92_MOUSE	X-prolyl aminopeptidase (Aminopeptidase P) 1, soluble, isoform CRA_b	Xpnpep1	Q3UE92	Mus musculus				tr	1	1	uniprot_mouse_proteome	>tr|Q3UE92|Q3UE92_MOUSE X-prolyl aminopeptidase (Aminopeptidase P) 1, soluble, isoform CRA_b OS=Mus musculus GN=Xpnpep1 PE=1 SV=1	13	14
TRUE	Old_Native / Young_Native	Old_Native	Young_Native	165	E9QAS4;E9QAS5;Q6PDQ2	1.25644e+06	1.03005e+06	-0.286628	0.286628	-18.0184	0.819816	0	1.07155e-08	1.14706e-07	164	0.0452481	E9QAS4;E9QAS5;Q6PDQ2	E9QAS4_MOUSE;E9QAS5_MOUSE;CHD4_MOUSE	Chromodomain-helicase-DNA-binding protein 4	Chd4	E9QAS4;E9QAS5;Q6PDQ2	Mus musculus	;;negative regulation of transcription from RNA polymerase II promoter,transcription, DNA-templated,chromatin modification,ATP-dependent chromatin remodeling,terminal button organization	;;RNA polymerase II repressing transcription factor binding,helicase activity,protein binding,ATP binding,transcription factor binding,histone deacetylase binding,metal ion binding,RNA polymerase II core promoter proximal region sequence-specific DNA binding,RNA polymerase II distal enhancer sequence-specific DNA binding,nucleosomal DNA binding	;;nuclear chromatin,nucleus,nucleoplasm,cytoplasm,centrosome,membrane,NuRD complex,protein-DNA complex,protein complex	tr;tr;sp	1	1	uniprot_mouse_proteome	>tr|E9QAS4|E9QAS4_MOUSE Chromodomain-helicase-DNA-binding protein 4 OS=Mus musculus GN=Chd4 PE=1 SV=1;>tr|E9QAS5|E9QAS5_MOUSE Chromodomain-helicase-DNA-binding protein 4 OS=Mus musculus GN=Chd4 PE=1 SV=1;>sp|Q6PDQ2|CHD4_MOUSE Chromodomain-helicase-DNA-binding protein 4 OS=Mus musculus GN=Chd4 PE=1 SV=1	30	33
TRUE	Old_Native / Young_Native	Old_Native	Young_Native	135	P35441	1.84016e+06	1.54365e+06	-0.253489	0.253489	-16.1135	0.838865	0	1.08267e-08	1.15348e-07	134	0.0900985	P35441	TSP1_MOUSE	Thrombospondin-1	Thbs1	P35441	Mus musculus	activation of MAPK activity,negative regulation of endothelial cell proliferation,negative regulation of cell-matrix adhesion,sprouting angiogenesis,negative regulation of antigen processing and presentation of peptide or polysaccharide antigen via MHC class II,negative regulation of dendritic cell antigen processing and presentation,outflow tract morphogenesis,endocardial cushion development,gro…	phosphatidylserine binding,fibronectin binding,integrin binding,calcium ion binding,protein binding,heparin binding,fibroblast growth factor binding,low-density lipoprotein particle binding,laminin binding,extracellular matrix binding,fibrinogen binding,collagen V binding	fibrinogen complex,extracellular space,endoplasmic reticulum,external side of plasma membrane,cell surface,sarcoplasmic reticulum,secretory granule,extracellular matrix,platelet alpha granule,extracellular exosome	sp	1	1	uniprot_mouse_proteome	>sp|P35441|TSP1_MOUSE Thrombospondin-1 OS=Mus musculus GN=Thbs1 PE=1 SV=1	26	27
TRUE	Old_Native / Young_Native	Old_Native	Young_Native	40	E9PV38	503042	682790	0.440765	0.440765	35.7323	1.35732	0	1.17857e-08	1.24973e-07	39	0.0593505	E9PV38	E9PV38_MOUSE	Carboxylic ester hydrolase	Ces2g	E9PV38	Mus musculus	biological_process	carboxylic ester hydrolase activity		tr	1	1	uniprot_mouse_proteome	>tr|E9PV38|E9PV38_MOUSE Carboxylic ester hydrolase OS=Mus musculus GN=Ces2g PE=1 SV=1	8	8
TRUE	Old_Native / Young_Native	Old_Native	Young_Native	100	A2AS98;P28660	593767	660822	0.154364	0.154364	11.2931	1.11293	0	1.20997e-08	1.27618e-07	99	0.0291373	A2AS98;P28660	A2AS98_MOUSE;NCKP1_MOUSE	Nck-associated protein 1	Nckap1	A2AS98;P28660	Mus musculus	;in utero embryonic development,somitogenesis,neural tube closure,zygotic determination of anterior/posterior axis, embryo,endoderm development,mesodermal cell migration,embryonic body morphogenesis,positive regulation of lamellipodium assembly,Rac protein signal transduction,lamellipodium assembly,positive regulation of actin filament polymerization,notochord development,establishment or mainten…	;protein binding,protein complex binding,Rac GTPase binding	;ruffle,focal adhesion,integral component of membrane,lamellipodium,SCAR complex,lamellipodium membrane,filamentous actin,extracellular exosome	tr;sp	1	1;2	uniprot_mouse_proteome	>tr|A2AS98|A2AS98_MOUSE Nck-associated protein 1 OS=Mus musculus GN=Nckap1 PE=1 SV=1;>sp|P28660|NCKP1_MOUSE Nck-associated protein 1 OS=Mus musculus GN=Nckap1 PE=1 SV=2	19	20
TRUE	Old_Native / Young_Native	Old_Native	Young_Native	60	Q9Z2A9	750485	1.09193e+06	0.540983	0.540983	45.4963	1.45496	0	1.21487e-08	1.27618e-07	59	0.0958405	Q9Z2A9	GGT5_MOUSE	Gamma-glutamyltransferase 5	Ggt5	Q9Z2A9	Mus musculus	translation,proteolysis,cellular amino acid metabolic process,fatty acid metabolic process,glutathione biosynthetic process,glutathione catabolic process,inflammatory response,leukotriene D4 biosynthetic process	peptidyltransferase activity,Requires Ontology,glutathione hydrolase activity	plasma membrane,integral component of membrane,intrinsic component of plasma membrane	sp	1	2	uniprot_mouse_proteome	>sp|Q9Z2A9|GGT5_MOUSE Gamma-glutamyltransferase 5 OS=Mus musculus GN=Ggt5 PE=1 SV=2	9	12
TRUE	Old_Native / Young_Native	Old_Native	Young_Native	55	Q9Z0Z4;Q9Z0Z4-2	489705	347902	-0.493232	0.493232	-28.9568	0.710432	0	1.3901e-08	1.45346e-07	54	0.088216	Q9Z0Z4;Q9Z0Z4-2	HEPH_MOUSE	Hephaestin;Isoform 2 of Hephaestin	Heph	Q9Z0Z4;Q9Z0Z4-2	Mus musculus	copper ion transport,iron ion transport,cellular iron ion homeostasis,oxidation-reduction process;	ferroxidase activity,copper ion binding,ferrous iron binding;	intracellular,integral component of membrane,basolateral plasma membrane,perinuclear region of cytoplasm;	sp	1;	3;	uniprot_mouse_proteome	>sp|Q9Z0Z4|HEPH_MOUSE Hephaestin OS=Mus musculus GN=Heph PE=1 SV=3;>sp|Q9Z0Z4-2|HEPH_MOUSE Isoform 2 of Hephaestin OS=Mus musculus GN=Heph	11	11
TRUE	Old_Native / Young_Native	Old_Native	Young_Native	30	Q9DCV7	58427.5	160002	1.45337	1.45337	173.846	2.73846	0	1.58637e-08	1.651e-07	29	0.224695	Q9DCV7	K2C7_MOUSE	Keratin, type II cytoskeletal 7	Krt7	Q9DCV7	Mus musculus		structural molecule activity,protein binding	nucleus,cytoplasm,keratin filament,extracellular exosome	sp	1	1	uniprot_mouse_proteome	>sp|Q9DCV7|K2C7_MOUSE Keratin, type II cytoskeletal 7 OS=Mus musculus GN=Krt7 PE=1 SV=1	6	6
TRUE	Old_Native / Young_Native	Old_Native	Young_Native	30	Q62469	78824.8	31635.1	-1.31712	1.31712	-59.8666	0.401334	0	1.63884e-08	1.69774e-07	29	0.1722	Q62469	ITA2_MOUSE	Integrin alpha-2	Itga2	Q62469	Mus musculus	response to hypoxia,positive regulation of leukocyte migration,substrate-dependent cell migration,hypotonic response,cell-matrix adhesion,integrin-mediated signaling pathway,female pregnancy,cell proliferation,positive regulation of epithelial cell migration,positive regulation of alkaline phosphatase activity,response to amine,response to muscle activity,positive regulation of smooth muscle cell…	beta-amyloid binding,integrin binding,collagen binding,protein complex binding,collagen receptor activity,laminin binding,metal ion binding,protein heterodimerization activity,collagen binding involved in cell-matrix adhesion	nucleus,plasma membrane,focal adhesion,external side of plasma membrane,cell surface,axon,integrin alpha2-beta1 complex,axon terminus,basal part of cell,perinuclear region of cytoplasm	sp	1	2	uniprot_mouse_proteome	>sp|Q62469|ITA2_MOUSE Integrin alpha-2 OS=Mus musculus GN=Itga2 PE=1 SV=2	6	6
TRUE	Old_Native / Young_Native	Old_Native	Young_Native	110	Q8BX02	1.24668e+06	1.45974e+06	0.227626	0.227626	17.0907	1.17091	0	1.68739e-08	1.74003e-07	109	0.0402093	Q8BX02	KANK2_MOUSE	KN motif and ankyrin repeat domain-containing protein 2	Kank2	Q8BX02	Mus musculus	negative regulation of transcription from RNA polymerase II promoter,transcription, DNA-templated,apoptotic process,negative regulation of cell proliferation,negative regulation of intracellular estrogen receptor signaling pathway,negative regulation of programmed cell death,negative regulation of stress fiber assembly,negative regulation of vitamin D receptor signaling pathway,negative regulatio…	molecular_function	cytoplasm,mitochondrion	sp	1	1	uniprot_mouse_proteome	>sp|Q8BX02|KANK2_MOUSE KN motif and ankyrin repeat domain-containing protein 2 OS=Mus musculus GN=Kank2 PE=1 SV=1	20	22
TRUE	Old_Native / Young_Native	Old_Native	Young_Native	100	P27046	688825	855959	0.313405	0.313405	24.2637	1.24264	0	1.71373e-08	1.75911e-07	99	0.0722192	P27046	MA2A1_MOUSE	Alpha-mannosidase 2	Man2a1	P27046	Mus musculus	in utero embryonic development,liver development,mannose metabolic process,protein glycosylation,N-glycan processing,protein deglycosylation,mitochondrion organization,vacuole organization,respiratory gaseous exchange,lung alveolus development,positive regulation of neurogenesis,retina morphogenesis in camera-type eye	alpha-mannosidase activity,mannosyl-oligosaccharide 1,3-1,6-alpha-mannosidase activity,mannosidase activity,hydrolase activity,hydrolase activity, hydrolyzing N-glycosyl compounds,carbohydrate binding,metal ion binding	Golgi membrane,extracellular space,Golgi apparatus,Golgi medial cisterna,cis-Golgi network,membrane,integral component of membrane,extracellular exosome	sp	1	2	uniprot_mouse_proteome	>sp|P27046|MA2A1_MOUSE Alpha-mannosidase 2 OS=Mus musculus GN=Man2a1 PE=1 SV=2	20	20
TRUE	Old_Native / Young_Native	Old_Native	Young_Native	30	A0A0R4J023;Q9JLZ3	639977	853326	0.415077	0.415077	33.337	1.33337	0	1.77882e-08	1.81763e-07	29	0.0685303	A0A0R4J023;Q9JLZ3	A0A0R4J023_MOUSE;AUHM_MOUSE	Methylglutaconyl-CoA hydratase, mitochondrial;Methylglutaconyl-CoA hydratase, mitochondrial	Auh	A0A0R4J023;Q9JLZ3	Mus musculus	;nuclear-transcribed mRNA catabolic process, deadenylation-dependent decay,leucine catabolic process,fatty acid beta-oxidation	;RNA binding,mRNA 3'-UTR binding,enoyl-CoA hydratase activity,methylglutaconyl-CoA hydratase activity	;mitochondrion	tr;sp	1	1	uniprot_mouse_proteome	>tr|A0A0R4J023|A0A0R4J023_MOUSE Methylglutaconyl-CoA hydratase, mitochondrial OS=Mus musculus GN=Auh PE=1 SV=1;>sp|Q9JLZ3|AUHM_MOUSE Methylglutaconyl-CoA hydratase, mitochondrial OS=Mus musculus GN=Auh PE=1 SV=1	5	6
TRUE	Old_Native / Young_Native	Old_Native	Young_Native	50	Q8BX70;Q8BX70-2;Q8BX70-3	173321	233317	0.428847	0.428847	34.6158	1.34616	0	1.82678e-08	1.85819e-07	49	0.0704648	Q8BX70;Q8BX70-2;Q8BX70-3	VP13C_MOUSE	Vacuolar protein sorting-associated protein 13C;Isoform 2 of Vacuolar protein sorting-associated protein 13C;Isoform 3 of Vacuolar protein sorting-associated protein 13C	Vps13c	Q8BX70;Q8BX70-2;Q8BX70-3	Mus musculus	mitochondrion organization,negative regulation of parkin-mediated mitophagy in response to mitochondrial depolarization;;	molecular_function;;	mitochondrial outer membrane,cytosol,extracellular exosome;;	sp	1;;	2;;	uniprot_mouse_proteome	>sp|Q8BX70|VP13C_MOUSE Vacuolar protein sorting-associated protein 13C OS=Mus musculus GN=Vps13c PE=1 SV=2;>sp|Q8BX70-2|VP13C_MOUSE Isoform 2 of Vacuolar protein sorting-associated protein 13C OS=Mus musculus GN=Vps13c;>sp|Q8BX70-3|VP13C_MOUSE Isoform 3 of Vacuolar protein sorting-associated protein 13C OS=Mus musculus GN=Vps13c	10	10
TRUE	Old_Native / Young_Native	Old_Native	Young_Native	50	Q99K85	340431	192326	-0.823813	0.823813	-43.5053	0.564947	0	1.86122e-08	1.88469e-07	49	0.178424	Q99K85	SERC_MOUSE	Phosphoserine aminotransferase	Psat1	Q99K85	Mus musculus	L-serine biosynthetic process	O-phospho-L-serine:2-oxoglutarate aminotransferase activity	cytoplasm,cytosol,extracellular exosome	sp	1	1	uniprot_mouse_proteome	>sp|Q99K85|SERC_MOUSE Phosphoserine aminotransferase OS=Mus musculus GN=Psat1 PE=1 SV=1	9	10
TRUE	Old_Native / Young_Native	Old_Native	Young_Native	15	P01660	60032.6	330176	2.45942	2.45942	449.994	5.49994	0	1.87292e-08	1.88804e-07	14	0.207843	P01660	KV3A8_MOUSE	Ig kappa chain V-III region PC 3741/TEPC 111	NaN	P01660	Mus musculus		antigen binding		sp	1	1	uniprot_mouse_proteome	>sp|P01660|KV3A8_MOUSE Ig kappa chain V-III region PC 3741/TEPC 111 OS=Mus musculus PE=1 SV=1	2	3
TRUE	Old_Native / Young_Native	Old_Native	Young_Native	50	G5E850;P56395	9602861	7267904	-0.401925	0.401925	-24.3152	0.756848	0	2.11694e-08	2.1245e-07	49	0.0731656	G5E850;P56395	G5E850_MOUSE;CYB5_MOUSE	Cytochrome b-5, isoform CRA_a;Cytochrome b5	Cyb5a	G5E850;P56395	Mus musculus	;fatty acid metabolic process,response to cadmium ion,oxidation-reduction process	;stearoyl-CoA 9-desaturase activity,enzyme binding,heme binding,metal ion binding	;mitochondrion,endoplasmic reticulum membrane,cytosol,membrane,integral component of membrane,organelle membrane,intracellular membrane-bounded organelle,extracellular exosome	tr;sp	1	1;2	uniprot_mouse_proteome	>tr|G5E850|G5E850_MOUSE Cytochrome b-5, isoform CRA_a OS=Mus musculus GN=Cyb5a PE=1 SV=1;>sp|P56395|CYB5_MOUSE Cytochrome b5 OS=Mus musculus GN=Cyb5a PE=1 SV=2	5	10
TRUE	Old_Native / Young_Native	Old_Native	Young_Native	50	Q99LJ6	897054	593921	-0.594924	0.594924	-33.7921	0.662079	0	2.13062e-08	2.12872e-07	49	0.0859453	Q99LJ6	GPX7_MOUSE	Glutathione peroxidase 7	Gpx7	Q99LJ6	Mus musculus	response to oxidative stress,oxidation-reduction process,cellular oxidant detoxification	catalase activity,peroxidase activity,glutathione peroxidase activity	extracellular region,endoplasmic reticulum	sp	1	1	uniprot_mouse_proteome	>sp|Q99LJ6|GPX7_MOUSE Glutathione peroxidase 7 OS=Mus musculus GN=Gpx7 PE=1 SV=1	9	10
TRUE	Old_Native / Young_Native	Old_Native	Young_Native	95	Q99JB2	1.88694e+06	2679618	0.505979	0.505979	42.0087	1.42009	0	2.47575e-08	2.4626e-07	94	0.0611892	Q99JB2	STML2_MOUSE	Stomatin-like protein 2, mitochondrial	Stoml2	Q99JB2	Mus musculus	mitochondrial calcium ion transport,cellular calcium ion homeostasis,mitochondrion organization,lipid localization,positive regulation of mitochondrial membrane potential,interleukin-2 production,mitochondrial protein processing,CD4-positive, alpha-beta T cell activation,mitochondrial ATP synthesis coupled proton transport,T cell receptor signaling pathway,protein oligomerization,positive regulat…	GTPase binding,cardiolipin binding	mitochondrion,mitochondrial inner membrane,mitochondrial intermembrane space,extrinsic component of plasma membrane,membrane raft,immunological synapse,COP9 signalosome,actin cytoskeleton,T cell receptor complex	sp	1	1	uniprot_mouse_proteome	>sp|Q99JB2|STML2_MOUSE Stomatin-like protein 2, mitochondrial OS=Mus musculus GN=Stoml2 PE=1 SV=1	12	19
TRUE	Old_Native / Young_Native	Old_Native	Young_Native	60	Q3V3R1	464368	346413	-0.422774	0.422774	-25.4011	0.745989	0	2.51719e-08	2.48134e-07	59	0.0756846	Q3V3R1	C1TM_MOUSE	Monofunctional C1-tetrahydrofolate synthase, mitochondrial	Mthfd1l	Q3V3R1	Mus musculus	neural tube closure,folic acid-containing compound metabolic process,purine nucleobase biosynthetic process,10-formyltetrahydrofolate biosynthetic process,formate metabolic process,tetrahydrofolate interconversion,tetrahydrofolate metabolic process,embryonic neurocranium morphogenesis,embryonic viscerocranium morphogenesis,oxidation-reduction process	formate-tetrahydrofolate ligase activity,methenyltetrahydrofolate cyclohydrolase activity,methylenetetrahydrofolate dehydrogenase (NADP+) activity,ATP binding,protein homodimerization activity	mitochondrion,membrane	sp	1	2	uniprot_mouse_proteome	>sp|Q3V3R1|C1TM_MOUSE Monofunctional C1-tetrahydrofolate synthase, mitochondrial OS=Mus musculus GN=Mthfd1l PE=1 SV=2	11	12
TRUE	Old_Native / Young_Native	Old_Native	Young_Native	50	A2AQJ8	625550	753060	0.26764	0.26764	20.3837	1.20384	0	2.5277e-08	2.48134e-07	49	0.0803105	A2AQJ8	A2AQJ8_MOUSE	Neutral alpha-glucosidase C	Ganc	A2AQJ8	Mus musculus				tr	1	1	uniprot_mouse_proteome	>tr|A2AQJ8|A2AQJ8_MOUSE Neutral alpha-glucosidase C OS=Mus musculus GN=Ganc PE=1 SV=1	9	10
TRUE	Old_Native / Young_Native	Old_Native	Young_Native	40	A0A067XG53;O70589;O70589-3;O70589-4;O70589-5	246376	388180	0.655866	0.655866	57.5562	1.57556	0	2.51861e-08	2.48134e-07	39	0.102776	A0A067XG53;O70589;O70589-3;O70589-4;O70589-5	A0A067XG53_MOUSE;CSKP_MOUSE;CSKP_MOUSE;CSKP_MOUSE;CSKP_MOUSE	Peripheral plasma membrane protein CASK (Fragment);Peripheral plasma membrane protein CASK;Isoform 3 of Peripheral plasma membrane protein CASK;Isoform 4 of Peripheral plasma membrane protein CASK;Isoform 5 of Peripheral plasma membrane protein CASK	Cask	A0A067XG53;O70589;O70589-3;O70589-4;O70589-5	Mus musculus	;negative regulation of cell-matrix adhesion,protein phosphorylation,negative regulation of keratinocyte proliferation,positive regulation of transcription from RNA polymerase II promoter,negative regulation of wound healing,calcium ion import,positive regulation of calcium ion import,negative regulation of cellular response to growth factor stimulus;;;	;protein serine/threonine kinase activity,protein binding,calmodulin binding,ATP binding,neurexin family protein binding;;;	;basement membrane,nucleus,nuclear lamina,nucleolus,cytoplasm,cytosol,cell-cell junction,focal adhesion,membrane,basolateral plasma membrane,nuclear matrix,vesicle,synapse;;;	tr;sp;sp;sp;sp	1;1;;;	1;2;;;	uniprot_mouse_proteome	>tr|A0A067XG53|A0A067XG53_MOUSE Peripheral plasma membrane protein CASK (Fragment) OS=Mus musculus GN=Cask PE=1 SV=1;>sp|O70589|CSKP_MOUSE Peripheral plasma membrane protein CASK OS=Mus musculus GN=Cask PE=1 SV=2;>sp|O70589-3|CSKP_MOUSE Isoform 3 of Peripheral plasma membrane protein CASK OS=Mus musculus GN=Cask;>sp|O70589-4|CSKP_MOUSE Isoform 4 of Peripheral plasma membrane protein CASK OS=Mus m…	8	8
TRUE	Old_Native / Young_Native	Old_Native	Young_Native	265	Q8CGC7	1.74775e+06	1.61773e+06	-0.111529	0.111529	-7.43933	0.925607	0	2.69632e-08	2.63536e-07	264	0.0288318	Q8CGC7	SYEP_MOUSE	Bifunctional glutamate/proline--tRNA ligase	Eprs	Q8CGC7	Mus musculus	glutamyl-tRNA aminoacylation,prolyl-tRNA aminoacylation,negative regulation of translation,cellular response to interferon-gamma	glutamate-tRNA ligase activity,proline-tRNA ligase activity,ATP binding,zinc ion binding,RNA stem-loop binding,protein homodimerization activity,GTPase binding	cytoplasm,cytosol,membrane,aminoacyl-tRNA synthetase multienzyme complex,intracellular ribonucleoprotein complex,GAIT complex	sp	1	4	uniprot_mouse_proteome	>sp|Q8CGC7|SYEP_MOUSE Bifunctional glutamate/proline--tRNA ligase OS=Mus musculus GN=Eprs PE=1 SV=4	46	53
TRUE	Old_Native / Young_Native	Old_Native	Young_Native	65	Q9QZF2	630519	791870	0.328723	0.328723	25.5901	1.2559	0	2.76543e-08	2.69121e-07	64	0.139891	Q9QZF2	GPC1_MOUSE	Glypican-1	Gpc1	Q9QZF2	Mus musculus	glycosaminoglycan biosynthetic process,Schwann cell differentiation,heparan sulfate proteoglycan catabolic process,myelin assembly,negative regulation of fibroblast growth factor receptor signaling pathway,positive regulation of skeletal muscle cell differentiation	copper ion binding,fibroblast growth factor binding,laminin binding,heparan sulfate proteoglycan binding	proteinaceous extracellular matrix,nucleoplasm,endosome,Golgi lumen,cytosol,plasma membrane,extracellular matrix,anchored component of membrane,membrane raft,extracellular exosome	sp	1	1	uniprot_mouse_proteome	>sp|Q9QZF2|GPC1_MOUSE Glypican-1 OS=Mus musculus GN=Gpc1 PE=1 SV=1	12	13
TRUE	Old_Native / Young_Native	Old_Native	Young_Native	60	Q5SWN2;Q8VEE4	275560	198089	-0.476216	0.476216	-28.1139	0.718861	0	3.17713e-08	3.07853e-07	59	0.087954	Q5SWN2;Q8VEE4	Q5SWN2_MOUSE;RFA1_MOUSE	Replication protein A 70 kDa DNA-binding subunit	Rpa1	Q5SWN2;Q8VEE4	Mus musculus	;telomere maintenance,double-strand break repair via homologous recombination,in utero embryonic development,DNA replication,DNA repair,base-excision repair,nucleotide-excision repair,mismatch repair,positive regulation of cell proliferation,hemopoiesis,protein localization to chromosome,homeostasis of number of cells within a tissue,chromosome organization,meiotic cell cycle	;chromatin binding,damaged DNA binding,single-stranded DNA binding,metal ion binding,G-rich strand telomeric DNA binding	;nuclear chromosome, telomeric region,condensed chromosome,condensed nuclear chromosome,lateral element,male germ cell nucleus,nucleus,nucleoplasm,DNA replication factor A complex,PML body	tr;sp	1	2;1	uniprot_mouse_proteome	>tr|Q5SWN2|Q5SWN2_MOUSE Replication protein A 70 kDa DNA-binding subunit OS=Mus musculus GN=Rpa1 PE=1 SV=2;>sp|Q8VEE4|RFA1_MOUSE Replication protein A 70 kDa DNA-binding subunit OS=Mus musculus GN=Rpa1 PE=1 SV=1	11	12
TRUE	Old_Native / Young_Native	Old_Native	Young_Native	75	A0A0R4J038;D3YTY9;O08677;O08677-3	2.17035e+06	2.9217e+06	0.428883	0.428883	34.6191	1.34619	0	3.30254e-08	3.18632e-07	74	0.0626406	A0A0R4J038;D3YTY9;O08677;O08677-3	A0A0R4J038_MOUSE;D3YTY9_MOUSE;KNG1_MOUSE;KNG1_MOUSE	Kininogen-1;Kininogen-1;Kininogen-1;Isoform 3 of Kininogen-1	Kng1	A0A0R4J038;D3YTY9;O08677;O08677-3	Mus musculus	;;inflammatory response,positive regulation of cytosolic calcium ion concentration,blood coagulation,negative regulation of endopeptidase activity,negative regulation of blood coagulation,vasodilation;	;;cysteine-type endopeptidase inhibitor activity,receptor binding;	;;extracellular space,cell,extracellular matrix,extracellular exosome,blood microparticle;	tr;tr;sp;sp	1;1;1;	1;1;1;	uniprot_mouse_proteome	>tr|A0A0R4J038|A0A0R4J038_MOUSE Kininogen-1 OS=Mus musculus GN=Kng1 PE=1 SV=1;>tr|D3YTY9|D3YTY9_MOUSE Kininogen-1 OS=Mus musculus GN=Kng1 PE=1 SV=1;>sp|O08677|KNG1_MOUSE Kininogen-1 OS=Mus musculus GN=Kng1 PE=1 SV=1;>sp|O08677-3|KNG1_MOUSE Isoform 3 of Kininogen-1 OS=Mus musculus GN=Kng1	13	15
TRUE	Old_Native / Young_Native	Old_Native	Young_Native	520	Q61554	3.55579e+06	3.15024e+06	-0.17471	0.17471	-11.4054	0.885946	0	3.40663e-08	3.2727e-07	519	0.0277112	Q61554	FBN1_MOUSE	Fibrillin-1	Fbn1	Q61554	Mus musculus	skeletal system development,metanephros development,heart development,anatomical structure morphogenesis,regulation of receptor activity,cell adhesion mediated by integrin,sequestering of BMP in extracellular matrix,sequestering of TGFbeta in extracellular matrix,camera-type eye development,negative regulation of osteoclast differentiation,embryonic eye morphogenesis,post-embryonic eye morphogene…	integrin binding,hormone activity,extracellular matrix structural constituent,calcium ion binding,protein binding,heparin binding,protein complex binding,identical protein binding	microfibril,extracellular region,proteinaceous extracellular matrix,basement membrane,extracellular space,extracellular matrix,extracellular exosome	sp	1	2	uniprot_mouse_proteome	>sp|Q61554|FBN1_MOUSE Fibrillin-1 OS=Mus musculus GN=Fbn1 PE=1 SV=2	79	104
TRUE	Old_Native / Young_Native	Old_Native	Young_Native	95	A0A0G2JGW9;Q3TUE1	2.40758e+06	2097866	-0.198662	0.198662	-12.8641	0.871359	0	3.86965e-08	3.70169e-07	94	0.049679	A0A0G2JGW9;Q3TUE1	A0A0G2JGW9_MOUSE;Q3TUE1_MOUSE	Far upstream element-binding protein 1	Fubp1	A0A0G2JGW9;Q3TUE1	Mus musculus	;	;	;	tr	1	1	uniprot_mouse_proteome	>tr|A0A0G2JGW9|A0A0G2JGW9_MOUSE Far upstream element-binding protein 1 OS=Mus musculus GN=Fubp1 PE=1 SV=1;>tr|Q3TUE1|Q3TUE1_MOUSE Far upstream element-binding protein 1 OS=Mus musculus GN=Fubp1 PE=1 SV=1	16	19
TRUE	Old_Native / Young_Native	Old_Native	Young_Native	25	Q9QZZ6	121373	332336	1.4532	1.4532	173.815	2.73815	0	4.6024e-08	4.38398e-07	24	0.260167	Q9QZZ6	DERM_MOUSE	Dermatopontin	Dpt	Q9QZZ6	Mus musculus	cell adhesion,negative regulation of cell proliferation,collagen fibril organization	molecular_function	proteinaceous extracellular matrix,extracellular space,extracellular matrix,extracellular exosome	sp	1	1	uniprot_mouse_proteome	>sp|Q9QZZ6|DERM_MOUSE Dermatopontin OS=Mus musculus GN=Dpt PE=1 SV=1	5	5
TRUE	Old_Native / Young_Native	Old_Native	Young_Native	35	Q91X76	262299	127427	-1.04154	1.04154	-51.4192	0.485808	0	4.81631e-08	4.56838e-07	34	0.168612	Q91X76	Q91X76_MOUSE	5'-nucleotidase domain containing 2	Nt5dc2	Q91X76	Mus musculus	dephosphorylation	5'-nucleotidase activity,metal ion binding	cellular_component	tr	1	1	uniprot_mouse_proteome	>tr|Q91X76|Q91X76_MOUSE 5'-nucleotidase domain containing 2 OS=Mus musculus GN=Nt5dc2 PE=1 SV=1	7	7
TRUE	Old_Native / Young_Native	Old_Native	Young_Native	90	G3UWC2;Q9CZR2	1417615	1.63615e+06	0.206838	0.206838	15.4156	1.15416	0	4.88271e-08	4.6069e-07	89	0.033893	G3UWC2;Q9CZR2	G3UWC2_MOUSE;NALD2_MOUSE	N-acetylated alpha-linked acidic dipeptidase 2, isoform CRA_a;N-acetylated-alpha-linked acidic dipeptidase 2	Naalad2	G3UWC2;Q9CZR2	Mus musculus	;proteolysis,neurotransmitter catabolic process	;carboxypeptidase activity,peptidase activity,metallopeptidase activity,dipeptidase activity,metal ion binding,N-formylglutamate deformylase activity	;plasma membrane,integral component of membrane	tr;sp	1	1;2	uniprot_mouse_proteome	>tr|G3UWC2|G3UWC2_MOUSE N-acetylated alpha-linked acidic dipeptidase 2, isoform CRA_a OS=Mus musculus GN=Naalad2 PE=1 SV=1;>sp|Q9CZR2|NALD2_MOUSE N-acetylated-alpha-linked acidic dipeptidase 2 OS=Mus musculus GN=Naalad2 PE=1 SV=2	17	18
TRUE	Old_Native / Young_Native	Old_Native	Young_Native	20	Q80W85	295049	67647	-2.12486	2.12486	-77.0726	0.229274	0	4.8979e-08	4.6069e-07	19	0.267642	Q80W85	NPM2_MOUSE	Nucleoplasmin-2	Npm2	Q80W85	Mus musculus	chromatin remodeling,regulation of exit from mitosis,single fertilization,embryo development,oocyte differentiation,chromatin modification,positive regulation of catalytic activity,positive regulation of DNA replication,positive regulation of meiotic nuclear division,protein homooligomerization	chromatin binding,enzyme binding	cytoplasmic chromatin,nuclear chromatin,nucleus	sp	2	1	uniprot_mouse_proteome	>sp|Q80W85|NPM2_MOUSE Nucleoplasmin-2 OS=Mus musculus GN=Npm2 PE=2 SV=1	4	4
TRUE	Old_Native / Young_Native	Old_Native	Young_Native	55	Q6P5D8	268634	206011	-0.382918	0.382918	-23.3115	0.766885	0	4.94677e-08	4.63348e-07	54	0.0601969	Q6P5D8	SMHD1_MOUSE	Structural maintenance of chromosomes flexible hinge domain-containing protein 1	Smchd1	Q6P5D8	Mus musculus	dosage compensation by inactivation of X chromosome,nose development,chromosome organization,inactivation of X chromosome by DNA methylation	ATP binding,ATPase activity	Barr body,nuclear chromosome, telomeric region	sp	1	2	uniprot_mouse_proteome	>sp|Q6P5D8|SMHD1_MOUSE Structural maintenance of chromosomes flexible hinge domain-containing protein 1 OS=Mus musculus GN=Smchd1 PE=1 SV=2	11	11
TRUE	Old_Native / Young_Native	Old_Native	Young_Native	55	F8WJ05;Q61702	474074	614467	0.374223	0.374223	29.6141	1.29614	0	5.11166e-08	4.76806e-07	54	0.072652	F8WJ05;Q61702	F8WJ05_MOUSE;ITIH1_MOUSE	Inter-alpha-trypsin inhibitor heavy chain H1	Itih1	F8WJ05;Q61702	Mus musculus	;negative regulation of endopeptidase activity,hyaluronan metabolic process	;serine-type endopeptidase inhibitor activity	;extracellular exosome,blood microparticle	tr;sp	1	1;2	uniprot_mouse_proteome	>tr|F8WJ05|F8WJ05_MOUSE Inter-alpha-trypsin inhibitor heavy chain H1 OS=Mus musculus GN=Itih1 PE=1 SV=1;>sp|Q61702|ITIH1_MOUSE Inter-alpha-trypsin inhibitor heavy chain H1 OS=Mus musculus GN=Itih1 PE=1 SV=2	11	11
TRUE	Old_Native / Young_Native	Old_Native	Young_Native	100	P62702	11462672	9961161	-0.202558	0.202558	-13.0991	0.869009	0	5.40254e-08	5.01856e-07	99	0.0398178	P62702	RS4X_MOUSE	40S ribosomal protein S4, X isoform	Rps4x	P62702	Mus musculus	translation,multicellular organism development,positive regulation of cell proliferation,positive regulation of translation	RNA binding,structural constituent of ribosome,rRNA binding	nucleus,ribosome,polysome,focal adhesion,small ribosomal subunit,membrane,cytosolic small ribosomal subunit,intracellular ribonucleoprotein complex,extracellular matrix,cytoplasmic ribonucleoprotein granule,extracellular exosome	sp	1	2	uniprot_mouse_proteome	>sp|P62702|RS4X_MOUSE 40S ribosomal protein S4, X isoform OS=Mus musculus GN=Rps4x PE=1 SV=2	14	20
TRUE	Old_Native / Young_Native	Old_Native	Young_Native	35	A2ADY9	531814	418551	-0.345516	0.345516	-21.2974	0.787026	0	5.57627e-08	5.15863e-07	34	0.0523453	A2ADY9	DDI2_MOUSE	Protein DDI1 homolog 2	Ddi2	A2ADY9	Mus musculus	proteolysis,intestinal absorption	aspartic-type endopeptidase activity,identical protein binding,ubiquitin binding	nucleoplasm,cytosol,brush border,membrane	sp	1	1	uniprot_mouse_proteome	>sp|A2ADY9|DDI2_MOUSE Protein DDI1 homolog 2 OS=Mus musculus GN=Ddi2 PE=1 SV=1	7	7
TRUE	Old_Native / Young_Native	Old_Native	Young_Native	100	Q3UJB0	1.38698e+06	1145396	-0.276103	0.276103	-17.4182	0.825818	0	5.6297e-08	5.1867e-07	99	0.0645651	Q3UJB0	Q3UJB0_MOUSE	Protein Sf3b2	Sf3b2	Q3UJB0	Mus musculus	mRNA splicing, via spliceosome	RNA binding,protein binding	spliceosomal complex,U2-type spliceosomal complex,U2 snRNP,U12-type spliceosomal complex,precatalytic spliceosome,catalytic step 2 spliceosome	tr	1	1	uniprot_mouse_proteome	>tr|Q3UJB0|Q3UJB0_MOUSE Protein Sf3b2 OS=Mus musculus GN=Sf3b2 PE=1 SV=1	17	20
TRUE	Old_Native / Young_Native	Old_Native	Young_Native	95	P60843	5.42407e+06	4.52787e+06	-0.260546	0.260546	-16.5228	0.834772	0	6.24275e-08	5.72804e-07	94	0.0616721	P60843	IF4A1_MOUSE	Eukaryotic initiation factor 4A-I	Eif4a1	P60843	Mus musculus	translational initiation,regulation of gene expression,RNA secondary structure unwinding	RNA binding,double-stranded RNA binding,translation initiation factor activity,ATP-dependent RNA helicase activity,protein binding,ATP binding	nucleolus,cytoplasm,membrane,extracellular matrix,extracellular exosome	sp	1	1	uniprot_mouse_proteome	>sp|P60843|IF4A1_MOUSE Eukaryotic initiation factor 4A-I OS=Mus musculus GN=Eif4a1 PE=1 SV=1	11	19
TRUE	Old_Native / Young_Native	Old_Native	Young_Native	50	A0A140T8M7;P62751	5.32316e+06	4532010	-0.232133	0.232133	-14.8625	0.851375	0	6.31109e-08	5.76721e-07	49	0.0433989	A0A140T8M7;P62751	A0A140T8M7_MOUSE;RL23A_MOUSE	Protein Rpl23a-ps3;60S ribosomal protein L23a	Rpl23a-ps3;Rpl23a	A0A140T8M7;P62751	Mus musculus	translation,cell proliferation;ribosomal large subunit assembly,translation,biological_process	RNA binding,structural constituent of ribosome,cadherin binding;RNA binding,structural constituent of ribosome,protein binding,rRNA binding	nucleolus,cytosolic large ribosomal subunit,extracellular exosome;nucleus,cytosolic large ribosomal subunit,TORC2 complex	tr;sp	3;1	1	uniprot_mouse_proteome	>tr|A0A140T8M7|A0A140T8M7_MOUSE Protein Rpl23a-ps3 OS=Mus musculus GN=Rpl23a-ps3 PE=3 SV=1;>sp|P62751|RL23A_MOUSE 60S ribosomal protein L23a OS=Mus musculus GN=Rpl23a PE=1 SV=1	7	10
TRUE	Old_Native / Young_Native	Old_Native	Young_Native	90	P28653	2565991	4.05957e+06	0.661812	0.661812	58.2068	1.58207	0	6.36158e-08	5.78981e-07	89	0.0877388	P28653	PGS1_MOUSE	Biglycan	Bgn	P28653	Mus musculus	blood vessel remodeling,negative regulation of protein kinase activity,cytokine-mediated signaling pathway,peptide cross-linking via chondroitin 4-sulfate glycosaminoglycan,negative regulation of JAK-STAT cascade	protein kinase inhibitor activity,glycosaminoglycan binding,extracellular matrix binding	proteinaceous extracellular matrix,extracellular space,intracellular,cytoplasm,cell surface,transport vesicle,extracellular matrix,sarcolemma,extracellular exosome	sp	1	1	uniprot_mouse_proteome	>sp|P28653|PGS1_MOUSE Biglycan OS=Mus musculus GN=Bgn PE=1 SV=1	13	18
TRUE	Old_Native / Young_Native	Old_Native	Young_Native	120	Q9WTM5	1.83631e+06	1.62743e+06	-0.174215	0.174215	-11.3751	0.886249	0	6.52699e-08	5.9164e-07	119	0.042677	Q9WTM5	RUVB2_MOUSE	RuvB-like 2	Ruvbl2	Q9WTM5	Mus musculus	box C/D snoRNP assembly,DNA repair,DNA recombination,chromatin remodeling,transcription, DNA-templated,regulation of transcription from RNA polymerase II promoter,histone acetylation,DNA duplex unwinding,cellular response to UV,positive regulation of histone acetylation,histone H4 acetylation,histone H2A acetylation,positive regulation of transcription from RNA polymerase II promoter,establishmen…	RNA polymerase II core promoter sequence-specific DNA binding,RNA polymerase II distal enhancer sequence-specific DNA binding,TFIID-class transcription factor binding,DNA helicase activity,ATP-dependent DNA helicase activity,protein binding,ATP binding,chromatin DNA binding,identical protein binding,protein homodimerization activity,ATP-dependent 5'-3' DNA helicase activity,ADP binding,ATPase bin…	Swr1 complex,intracellular,nucleus,nucleoplasm,nuclear euchromatin,centrosome,cytosol,intracellular ribonucleoprotein complex,Ino80 complex,NuA4 histone acetyltransferase complex,extracellular exosome,MLL1 complex,R2TP complex	sp	1	3	uniprot_mouse_proteome	>sp|Q9WTM5|RUVB2_MOUSE RuvB-like 2 OS=Mus musculus GN=Ruvbl2 PE=1 SV=3	22	24
TRUE	Old_Native / Young_Native	Old_Native	Young_Native	55	O70400	611744	499410	-0.292704	0.292704	-18.363	0.81637	0	6.63985e-08	5.99453e-07	54	0.0522707	O70400	PDLI1_MOUSE	PDZ and LIM domain protein 1	Pdlim1	O70400	Mus musculus	response to hypoxia,regulation of transcription, DNA-templated,cell-cell adhesion	transcription coactivator activity,protein binding,metal ion binding,cadherin binding involved in cell-cell adhesion	transcription factor complex,cytoplasm,cytoskeleton,cell-cell adherens junction,focal adhesion	sp	1	4	uniprot_mouse_proteome	>sp|O70400|PDLI1_MOUSE PDZ and LIM domain protein 1 OS=Mus musculus GN=Pdlim1 PE=1 SV=4	10	11
TRUE	Old_Native / Young_Native	Old_Native	Young_Native	145	Q8BL66	731284	755312	0.0466404	0.0466404	3.28569	1.03286	0	6.97511e-08	6.24703e-07	144	0.0297687	Q8BL66	EEA1_MOUSE	Early endosome antigen 1	Eea1	Q8BL66	Mus musculus	endocytosis,vesicle fusion,viral RNA genome replication	nucleic acid binding,protein binding,1-phosphatidylinositol binding,GTP-dependent protein binding,protein homodimerization activity,metal ion binding	endosome,early endosome,cytosol,serine-pyruvate aminotransferase complex,extrinsic component of plasma membrane,cytoplasmic vesicle,early endosome membrane,axonal spine,recycling endosome,extracellular exosome	sp	1	2	uniprot_mouse_proteome	>sp|Q8BL66|EEA1_MOUSE Early endosome antigen 1 OS=Mus musculus GN=Eea1 PE=1 SV=2	29	29
TRUE	Old_Native / Young_Native	Old_Native	Young_Native	45	E9QPX1;P39061;P39061-1;P39061-2	605815	769336	0.344737	0.344737	26.9919	1.26992	0	6.95485e-08	6.24703e-07	44	0.051865	E9QPX1;P39061;P39061-1;P39061-2	E9QPX1_MOUSE;COIA1_MOUSE;COIA1_MOUSE;COIA1_MOUSE	Collagen alpha-1(XVIII) chain;Collagen alpha-1(XVIII) chain;Isoform 2 of Collagen alpha-1(XVIII) chain;Isoform 3 of Collagen alpha-1(XVIII) chain	Col18a1	E9QPX1;P39061;P39061-1;P39061-2	Mus musculus	;angiogenesis,endothelial cell morphogenesis,cell adhesion,positive regulation of cell proliferation,extracellular matrix organization,positive regulation of cell migration,response to drug,response to hydrostatic pressure,positive regulation of endothelial cell apoptotic process;;	;structural molecule activity,metal ion binding;;	;collagen trimer,basement membrane,extracellular space,extracellular matrix,extracellular exosome;;	tr;sp;sp;sp	1;1;;	1;4;;	uniprot_mouse_proteome	>tr|E9QPX1|E9QPX1_MOUSE Collagen alpha-1(XVIII) chain OS=Mus musculus GN=Col18a1 PE=1 SV=1;>sp|P39061|COIA1_MOUSE Collagen alpha-1(XVIII) chain OS=Mus musculus GN=Col18a1 PE=1 SV=4;>sp|P39061-1|COIA1_MOUSE Isoform 2 of Collagen alpha-1(XVIII) chain OS=Mus musculus GN=Col18a1;>sp|P39061-2|COIA1_MOUSE Isoform 3 of Collagen alpha-1(XVIII) chain OS=Mus musculus GN=Col18a1	9	9
TRUE	Old_Native / Young_Native	Old_Native	Young_Native	115	P97429	2.99393e+06	3695884	0.303877	0.303877	23.4457	1.23446	0	7.30091e-08	6.51288e-07	114	0.0461941	P97429	ANXA4_MOUSE	Annexin A4	Anxa4	P97429	Mus musculus	kidney development,regulation of transcription from RNA polymerase II promoter,Notch signaling pathway,epithelial cell differentiation,negative regulation of NF-kappaB transcription factor activity,negative regulation of interleukin-8 secretion	calcium ion binding,calcium-dependent phospholipid binding,identical protein binding,calcium-dependent protein binding,NF-kappaB binding	nucleus,cytoplasm,plasma membrane,cell surface,vesicle membrane,apical plasma membrane,nuclear membrane,perinuclear region of cytoplasm,extracellular exosome	sp	1	4	uniprot_mouse_proteome	>sp|P97429|ANXA4_MOUSE Annexin A4 OS=Mus musculus GN=Anxa4 PE=1 SV=4	17	23
TRUE	Old_Native / Young_Native	Old_Native	Young_Native	40	P28867;P28867-2	418071	260217	-0.684029	0.684029	-37.7575	0.622425	0	7.8092e-08	6.91145e-07	39	0.122976	P28867;P28867-2	KPCD_MOUSE	Protein kinase C delta type;Isoform 2 of Protein kinase C delta type	Prkcd	P28867;P28867-2	Mus musculus	protein phosphorylation,apoptotic process,cell cycle,immunoglobulin mediated immune response,histone phosphorylation,peptidyl-serine phosphorylation,peptidyl-threonine phosphorylation,peptidyl-tyrosine phosphorylation,termination of signal transduction,negative regulation of actin filament polymerization,positive regulation of endodeoxyribonuclease activity,activation of protein kinase activity,i…	protein kinase activity,protein serine/threonine kinase activity,protein kinase C activity,calcium-independent protein kinase C activity,non-membrane spanning protein tyrosine kinase activity,protein binding,ATP binding,enzyme activator activity,enzyme binding,kinase binding,protein kinase binding,insulin receptor substrate binding,metal ion binding;	nucleus,cytoplasm,endoplasmic reticulum,cytosol,plasma membrane,cell-cell junction,membrane,nuclear matrix,perinuclear region of cytoplasm,extracellular exosome;	sp	1;	3;	uniprot_mouse_proteome	>sp|P28867|KPCD_MOUSE Protein kinase C delta type OS=Mus musculus GN=Prkcd PE=1 SV=3;>sp|P28867-2|KPCD_MOUSE Isoform 2 of Protein kinase C delta type OS=Mus musculus GN=Prkcd	8	8
TRUE	Old_Native / Young_Native	Old_Native	Young_Native	40	Q9CXF4	235171	177780	-0.403619	0.403619	-24.404	0.75596	0	7.78798e-08	6.91145e-07	39	0.0578278	Q9CXF4	TBC15_MOUSE	TBC1 domain family member 15	Tbc1d15	Q9CXF4	Mus musculus	intracellular protein transport,regulation of vesicle fusion,regulation of GTPase activity,activation of GTPase activity	GTPase activator activity,Rab GTPase binding	extracellular region,cytoplasm,mitochondrion,endomembrane system,extracellular exosome	sp	1	1	uniprot_mouse_proteome	>sp|Q9CXF4|TBC15_MOUSE TBC1 domain family member 15 OS=Mus musculus GN=Tbc1d15 PE=1 SV=1	8	8
TRUE	Old_Native / Young_Native	Old_Native	Young_Native	200	P80318	5060904	4263625	-0.247315	0.247315	-15.7537	0.842463	0	8.81485e-08	7.7709e-07	199	0.0391355	P80318	TCPG_MOUSE	T-complex protein 1 subunit gamma	Cct3	P80318	Mus musculus	'de novo' protein folding,binding of sperm to zona pellucida,positive regulation of telomere maintenance via telomerase,pore complex assembly,protein stabilization,chaperone-mediated protein folding,toxin transport,positive regulation of protein localization to Cajal body,positive regulation of telomerase RNA localization to Cajal body	RNA binding,protein binding,ATP binding,protein binding involved in protein folding,unfolded protein binding	zona pellucida receptor complex,cytosol,chaperonin-containing T-complex,microtubule,plasma membrane,myelin sheath,cell body,extracellular exosome	sp	1	1	uniprot_mouse_proteome	>sp|P80318|TCPG_MOUSE T-complex protein 1 subunit gamma OS=Mus musculus GN=Cct3 PE=1 SV=1	33	40
TRUE	Old_Native / Young_Native	Old_Native	Young_Native	65	O35685	1.97317e+06	1.65309e+06	-0.255347	0.255347	-16.2215	0.837785	0	9.10295e-08	7.99353e-07	64	0.0498764	O35685	NUDC_MOUSE	Nuclear migration protein nudC	Nudc	O35685	Mus musculus	protein folding,cell cycle,developmental process,cell division	protein binding,cadherin binding,unfolded protein binding	nucleus,cytoplasm,microtubule	sp	1	1	uniprot_mouse_proteome	>sp|O35685|NUDC_MOUSE Nuclear migration protein nudC OS=Mus musculus GN=Nudc PE=1 SV=1	13	13
TRUE	Old_Native / Young_Native	Old_Native	Young_Native	110	G3UYD0;Q3UHU8;Q9ESZ8;Q9ESZ8-2;Q9ESZ8-3;Q9ESZ8-4;Q9ESZ8-5;Q9ESZ8-6	5249864	4.18509e+06	-0.327023	0.327023	-20.282	0.79718	0	1.06485e-07	9.31437e-07	109	0.0478094	G3UYD0;Q3UHU8;Q9ESZ8;Q9ESZ8-2;Q9ESZ8-3;Q9ESZ8-4;Q9ESZ8-5;Q9ESZ8-6	G3UYD0_MOUSE;Q3UHU8_MOUSE;GTF2I_MOUSE;GTF2I_MOUSE;GTF2I_MOUSE;GTF2I_MOUSE;GTF2I_MOUSE;GTF2I_MOUSE	General transcription factor II-I;General transcription factor II-I;General transcription factor II-I;Isoform 2 of General transcription factor II-I;Isoform 3 of General transcription factor II-I;Isoform 4 of General transcription factor II-I;Isoform 5 of General transcription factor II-I;Isoform 6 of General transcription factor II-I	Gtf2i	G3UYD0;Q3UHU8;Q9ESZ8;Q9ESZ8-2;Q9ESZ8-3;Q9ESZ8-4;Q9ESZ8-5;Q9ESZ8-6	Mus musculus	;;regulation of transcription from RNA polymerase II promoter,transcription from RNA polymerase II promoter,transition between slow and fast fiber,negative regulation of angiogenesis,negative regulation of cytosolic calcium ion concentration;;;;;	;;RNA polymerase II transcription factor activity, sequence-specific DNA binding,DNA binding,protein binding,mitogen-activated protein kinase binding;;;;;	;;nucleus,nucleoplasm,cytoplasm,membrane,cell projection,neuronal cell body;;;;;	tr;tr;sp;sp;sp;sp;sp;sp	1;1;1;;;;;	1;1;3;;;;;	uniprot_mouse_proteome	>tr|G3UYD0|G3UYD0_MOUSE General transcription factor II-I OS=Mus musculus GN=Gtf2i PE=1 SV=1;>tr|Q3UHU8|Q3UHU8_MOUSE General transcription factor II-I OS=Mus musculus GN=Gtf2i PE=1 SV=1;>sp|Q9ESZ8|GTF2I_MOUSE General transcription factor II-I OS=Mus musculus GN=Gtf2i PE=1 SV=3;>sp|Q9ESZ8-2|GTF2I_MOUSE Isoform 2 of General transcription factor II-I OS=Mus musculus GN=Gtf2i;>sp|Q9ESZ8-3|GTF2I_MOUSE…	22	22
TRUE	Old_Native / Young_Native	Old_Native	Young_Native	100	P14148	4269460	3.17549e+06	-0.427073	0.427073	-25.6231	0.743769	0	1.09864e-07	9.57269e-07	99	0.0716178	P14148	RL7_MOUSE	60S ribosomal protein L7	Rpl7	P14148	Mus musculus	maturation of LSU-rRNA from tricistronic rRNA transcript (SSU-rRNA, 5.8S rRNA, LSU-rRNA),cytoplasmic translation,rRNA processing,translation,ribosomal large subunit biogenesis	DNA binding,RNA binding,mRNA binding,structural constituent of ribosome,protein homodimerization activity	nucleus,nucleolus,cytoplasm,polysome,focal adhesion,membrane,cytosolic large ribosomal subunit,intracellular ribonucleoprotein complex,extracellular exosome	sp	1	2	uniprot_mouse_proteome	>sp|P14148|RL7_MOUSE 60S ribosomal protein L7 OS=Mus musculus GN=Rpl7 PE=1 SV=2	17	20
TRUE	Old_Native / Young_Native	Old_Native	Young_Native	380	P20152	47695244	66305940	0.475293	0.475293	39.02	1.3902	0	1.10671e-07	9.60576e-07	379	0.0522174	P20152	VIME_MOUSE	Vimentin	Vim	P20152	Mus musculus	positive regulation of gene expression,negative regulation of neuron projection development,astrocyte development,intermediate filament-based process,intermediate filament organization,Bergmann glial cell differentiation,SMAD protein signal transduction,lens fiber cell development	double-stranded RNA binding,structural molecule activity,structural constituent of cytoskeleton,structural constituent of eye lens,protein binding,protein C-terminus binding,identical protein binding,scaffold protein binding,keratin filament binding	cytoplasm,peroxisome,cytosol,cytoskeleton,intermediate filament,plasma membrane,focal adhesion,extracellular matrix,cell leading edge,cell projection,neuron projection,type III intermediate filament,extracellular exosome	sp	1	3	uniprot_mouse_proteome	>sp|P20152|VIME_MOUSE Vimentin OS=Mus musculus GN=Vim PE=1 SV=3	39	76
TRUE	Old_Native / Young_Native	Old_Native	Young_Native	20	Q9D7X8	241908	163600	-0.564287	0.564287	-32.3711	0.676289	0	1.12521e-07	9.72877e-07	19	0.0658663	Q9D7X8	GGCT_MOUSE	Gamma-glutamylcyclotransferase	Ggct	Q9D7X8	Mus musculus	release of cytochrome c from mitochondria	gamma-glutamylcyclotransferase activity,protein homodimerization activity	cytosol,extracellular exosome	sp	1	1	uniprot_mouse_proteome	>sp|Q9D7X8|GGCT_MOUSE Gamma-glutamylcyclotransferase OS=Mus musculus GN=Ggct PE=1 SV=1	4	4
TRUE	Old_Native / Young_Native	Old_Native	Young_Native	65	Q61635	376597	494090	0.391754	0.391754	31.1988	1.31199	0	1.19419e-07	1.02856e-06	64	0.107891	Q61635	Q61635_MOUSE	GTP-binding protein	Ifi47	Q61635	Mus musculus	defense response,cellular response to interferon-beta	GTPase activity,GTP binding	endoplasmic reticulum,endoplasmic reticulum membrane	tr	1	1	uniprot_mouse_proteome	>tr|Q61635|Q61635_MOUSE GTP-binding protein OS=Mus musculus GN=Ifi47 PE=1 SV=1	12	13
TRUE	Old_Native / Young_Native	Old_Native	Young_Native	45	P49182	304724	552598	0.858725	0.858725	81.3435	1.81344	0	1.20974e-07	1.03798e-06	44	0.127681	P49182	HEP2_MOUSE	Heparin cofactor 2	Serpind1	P49182	Mus musculus	blood coagulation,negative regulation of endopeptidase activity	serine-type endopeptidase inhibitor activity,heparin binding	extracellular space,extracellular exosome	sp	1	1	uniprot_mouse_proteome	>sp|P49182|HEP2_MOUSE Heparin cofactor 2 OS=Mus musculus GN=Serpind1 PE=1 SV=1	7	9
TRUE	Old_Native / Young_Native	Old_Native	Young_Native	35	D3Z2G8	2.57233e+06	2.10418e+06	-0.289821	0.289821	-18.1997	0.818003	0	1.22625e-07	1.04814e-06	34	0.0535885	D3Z2G8	D3Z2G8_MOUSE	Long-chain-fatty-acid--CoA ligase ACSBG1 (Fragment)	Acsbg1	D3Z2G8	Mus musculus				tr	1	1	uniprot_mouse_proteome	>tr|D3Z2G8|D3Z2G8_MOUSE Long-chain-fatty-acid--CoA ligase ACSBG1 (Fragment) OS=Mus musculus GN=Acsbg1 PE=1 SV=1	5	7
TRUE	Old_Native / Young_Native	Old_Native	Young_Native	35	D3Z1Z8;D3Z5N2;P54227	1909919	988239	-0.95058	0.95058	-48.2575	0.517425	0	1.33473e-07	1.13654e-06	34	0.147253	D3Z1Z8;D3Z5N2;P54227	D3Z1Z8_MOUSE;D3Z5N2_MOUSE;STMN1_MOUSE	Stathmin (Fragment);Stathmin;Stathmin	Stmn1	D3Z1Z8;D3Z5N2;P54227	Mus musculus	;;mitotic cytokinesis,microtubule depolymerization,mitotic spindle organization,axonogenesis,brain development,response to virus,regulation of microtubule polymerization or depolymerization,negative regulation of microtubule polymerization,negative regulation of Rho protein signal transduction,hepatocyte growth factor receptor signaling pathway,positive regulation of cellular component movement,n…	;;protein binding,tubulin binding	;;intracellular,cytoplasm,cytosol,microtubule,membrane,neuron projection,extracellular exosome	tr;tr;sp	1	1;1;2	uniprot_mouse_proteome	>tr|D3Z1Z8|D3Z1Z8_MOUSE Stathmin (Fragment) OS=Mus musculus GN=Stmn1 PE=1 SV=1;>tr|D3Z5N2|D3Z5N2_MOUSE Stathmin OS=Mus musculus GN=Stmn1 PE=1 SV=1;>sp|P54227|STMN1_MOUSE Stathmin OS=Mus musculus GN=Stmn1 PE=1 SV=2	5	7
TRUE	Old_Native / Young_Native	Old_Native	Young_Native	30	P41317	430668	958003	1.15345	1.15345	122.446	2.22446	0	1.48067e-07	1.25605e-06	29	0.164195	P41317	MBL2_MOUSE	Mannose-binding protein C	Mbl2	P41317	Mus musculus	complement activation, lectin pathway,complement activation, classical pathway,negative regulation of growth of symbiont in host,innate immune response,negative regulation of viral process,positive regulation of phagocytosis,defense response to Gram-positive bacterium,killing by host of symbiont cells	receptor binding,calcium ion binding,mannose binding,calcium-dependent protein binding	collagen trimer,extracellular space	sp	1	2	uniprot_mouse_proteome	>sp|P41317|MBL2_MOUSE Mannose-binding protein C OS=Mus musculus GN=Mbl2 PE=1 SV=2	6	6
TRUE	Old_Native / Young_Native	Old_Native	Young_Native	105	A0A0R4J112;Q80XI3-2;Q80XI3-4;Z4YKC4	424083	368578	-0.202377	0.202377	-13.0883	0.869117	0	1.55966e-07	1.31808e-06	104	0.0413289	A0A0R4J112;Q80XI3-2;Q80XI3-4;Z4YKC4	A0A0R4J112_MOUSE;IF4G3_MOUSE;IF4G3_MOUSE;Z4YKC4_MOUSE	Eukaryotic translation initiation factor 4 gamma 3;Isoform 2 of Eukaryotic translation initiation factor 4 gamma 3;Isoform 4 of Eukaryotic translation initiation factor 4 gamma 3;Eukaryotic translation initiation factor 4 gamma 3	Eif4g3	A0A0R4J112;Q80XI3-2;Q80XI3-4;Z4YKC4	Mus musculus	;;;	;;;	;;;	tr;sp;sp;tr	1;;;1	1;;;1	uniprot_mouse_proteome	>tr|A0A0R4J112|A0A0R4J112_MOUSE Eukaryotic translation initiation factor 4 gamma 3 OS=Mus musculus GN=Eif4g3 PE=1 SV=1;>sp|Q80XI3-2|IF4G3_MOUSE Isoform 2 of Eukaryotic translation initiation factor 4 gamma 3 OS=Mus musculus GN=Eif4g3;>sp|Q80XI3-4|IF4G3_MOUSE Isoform 4 of Eukaryotic translation initiation factor 4 gamma 3 OS=Mus musculus GN=Eif4g3;>tr|Z4YKC4|Z4YKC4_MOUSE Eukaryotic translation ini…	20	21
TRUE	Old_Native / Young_Native	Old_Native	Young_Native	135	Q99K48	6384619	5.26344e+06	-0.278593	0.278593	-17.5606	0.824394	0	1.56743e-07	1.3197e-06	134	0.045217	Q99K48	NONO_MOUSE	Non-POU domain-containing octamer-binding protein	Nono	Q99K48	Mus musculus	mRNA splicing, via spliceosome,activation of innate immune response,DNA repair,DNA recombination,transcription, DNA-templated,circadian rhythm,regulation of circadian rhythm,negative regulation of transcription, DNA-templated,negative regulation of oxidative stress-induced neuron intrinsic apoptotic signaling pathway	RNA polymerase II distal enhancer sequence-specific DNA binding,core promoter binding,chromatin binding,RNA binding,protein binding,identical protein binding	nucleus,nucleoplasm,nucleolus,membrane,nuclear matrix,nuclear speck,paraspeckles,RNA polymerase II transcription factor complex	sp	1	3	uniprot_mouse_proteome	>sp|Q99K48|NONO_MOUSE Non-POU domain-containing octamer-binding protein OS=Mus musculus GN=Nono PE=1 SV=3	17	27
TRUE	Old_Native / Young_Native	Old_Native	Young_Native	125	Q91Z53	5.7089e+06	7.81351e+06	0.452758	0.452758	36.8654	1.36865	0	1.65655e-07	1.38952e-06	124	0.071827	Q91Z53	GRHPR_MOUSE	Glyoxylate reductase/hydroxypyruvate reductase	Grhpr	Q91Z53	Mus musculus	excretion,dicarboxylic acid metabolic process,protein oligomerization,oxidation-reduction process	glycerate dehydrogenase activity,hydroxypyruvate reductase activity,glyoxylate reductase (NADP) activity,carboxylic acid binding,protein homodimerization activity,NAD binding,NADPH binding	cytoplasm,cytosol,extracellular exosome	sp	1	1	uniprot_mouse_proteome	>sp|Q91Z53|GRHPR_MOUSE Glyoxylate reductase/hydroxypyruvate reductase OS=Mus musculus GN=Grhpr PE=1 SV=1	16	25
TRUE	Old_Native / Young_Native	Old_Native	Young_Native	10	P06800;P06800-2;P06800-3;S4R1M0;S4R1S4;S4R2V1	10988.8	29386.8	1.41914	1.41914	167.426	2.67426	0	1.75308e-07	1.46503e-06	9	0.112123	P06800;P06800-2;P06800-3;S4R1M0;S4R1S4;S4R2V1	PTPRC_MOUSE;PTPRC_MOUSE;PTPRC_MOUSE;S4R1M0_MOUSE;S4R1S4_MOUSE;S4R2V1_MOUSE	Receptor-type tyrosine-protein phosphatase C;Isoform 2 of Receptor-type tyrosine-protein phosphatase C;Isoform 3 of Receptor-type tyrosine-protein phosphatase C;Receptor-type tyrosine-protein phosphatase C;Receptor-type tyrosine-protein phosphatase C;Protein tyrosine phosphatase, receptor type, C, isoform CRA_b	Ptprc	P06800;P06800-2;P06800-3;S4R1M0;S4R1S4;S4R2V1	Mus musculus	activation of MAPK activity,negative regulation of T cell mediated cytotoxicity,positive regulation of T cell mediated cytotoxicity,negative regulation of cytokine-mediated signaling pathway,hematopoietic progenitor cell differentiation,immunoglobulin biosynthetic process,positive regulation of T cell mediated immunity,regulation of humoral immune response mediated by circulating immunoglobulin,p…	protein tyrosine phosphatase activity,protein binding,heparin binding,protein kinase binding,identical protein binding,heparan sulfate proteoglycan binding;;;;;	plasma membrane,integral component of plasma membrane,focal adhesion,external side of plasma membrane,cell surface,membrane,membrane raft,extracellular exosome,cell periphery;;;;;	sp;sp;sp;tr;tr;tr	1;;;1;1;1	3;;;1;1;1	uniprot_mouse_proteome	>sp|P06800|PTPRC_MOUSE Receptor-type tyrosine-protein phosphatase C OS=Mus musculus GN=Ptprc PE=1 SV=3;>sp|P06800-2|PTPRC_MOUSE Isoform 2 of Receptor-type tyrosine-protein phosphatase C OS=Mus musculus GN=Ptprc;>sp|P06800-3|PTPRC_MOUSE Isoform 3 of Receptor-type tyrosine-protein phosphatase C OS=Mus musculus GN=Ptprc;>tr|S4R1M0|S4R1M0_MOUSE Receptor-type tyrosine-protein phosphatase C OS=Mus musc…	2	2
TRUE	Old_Native / Young_Native	Old_Native	Young_Native	145	P80315	4244335	3569026	-0.250008	0.250008	-15.9108	0.840892	0	1.78241e-07	1.48402e-06	144	0.0429769	P80315	TCPD_MOUSE	T-complex protein 1 subunit delta	Cct4	P80315	Mus musculus	'de novo' protein folding,binding of sperm to zona pellucida,positive regulation of telomere maintenance via telomerase,protein stabilization,positive regulation of telomerase activity,chaperone-mediated protein folding,scaRNA localization to Cajal body,toxin transport,positive regulation of establishment of protein localization to telomere,positive regulation of protein localization to Cajal bod…	RNA binding,protein binding,ATP binding,protein binding involved in protein folding,unfolded protein binding	zona pellucida receptor complex,nucleoplasm,centrosome,cytosol,chaperonin-containing T-complex,microtubule,cilium,melanosome,cell body,extracellular exosome	sp	1	3	uniprot_mouse_proteome	>sp|P80315|TCPD_MOUSE T-complex protein 1 subunit delta OS=Mus musculus GN=Cct4 PE=1 SV=3	22	29
TRUE	Old_Native / Young_Native	Old_Native	Young_Native	240	O55143	3.02734e+06	2797003	-0.114171	0.114171	-7.60869	0.923913	0	1.85739e-07	1.54075e-06	239	0.039102	O55143	AT2A2_MOUSE	Sarcoplasmic/endoplasmic reticulum calcium ATPase 2	Atp2a2	O55143	Mus musculus	regulation of the force of heart contraction,cellular calcium ion homeostasis,regulation of muscle contraction,ER-nucleus signaling pathway,organelle organization,regulation of cardiac muscle contraction by calcium ion signaling,transition between fast and slow fiber,cardiac muscle hypertrophy in response to stress,endoplasmic reticulum calcium ion homeostasis,positive regulation of endoplasmic r…	calcium-transporting ATPase activity,calcium ion binding,protein binding,ATP binding,protein C-terminus binding,enzyme binding,lutropin-choriogonadotropic hormone receptor binding,S100 protein binding,calcium-transporting ATPase activity involved in regulation of cardiac muscle cell membrane potential	nucleoplasm,endoplasmic reticulum,endoplasmic reticulum membrane,vesicle membrane,longitudinal sarcoplasmic reticulum,membrane,sarcoplasmic reticulum,extrinsic component of cytoplasmic side of plasma membrane,sarcoplasmic reticulum membrane,protein complex,perinuclear region of cytoplasm,calcium ion-transporting ATPase complex,ribbon synapse,intercalated disc	sp	1	2	uniprot_mouse_proteome	>sp|O55143|AT2A2_MOUSE Sarcoplasmic/endoplasmic reticulum calcium ATPase 2 OS=Mus musculus GN=Atp2a2 PE=1 SV=2	37	48
TRUE	Old_Native / Young_Native	Old_Native	Young_Native	30	O88508	105999	59337.1	-0.83705	0.83705	-44.0213	0.559787	0	1.88503e-07	1.55792e-06	29	0.151476	O88508	DNM3A_MOUSE	DNA (cytosine-5)-methyltransferase 3A	Dnmt3a	O88508	Mus musculus	negative regulation of transcription from RNA polymerase II promoter,mitotic cell cycle,DNA methylation,methylation-dependent chromatin silencing,regulation of gene expression by genetic imprinting,transcription, DNA-templated,spermatogenesis,aging,response to toxic substance,response to ionizing radiation,response to lead ion,positive regulation of cell death,neuron differentiation,response to e…	DNA binding,chromatin binding,DNA (cytosine-5-)-methyltransferase activity,protein binding,methyltransferase activity,identical protein binding,metal ion binding,DNA (cytosine-5-)-methyltransferase activity, acting on CpN substrates	chromosome, centromeric region,euchromatin,heterochromatin,XY body,nucleus,nucleoplasm,nuclear heterochromatin,cytoplasm,nuclear matrix	sp	1	2	uniprot_mouse_proteome	>sp|O88508|DNM3A_MOUSE DNA (cytosine-5)-methyltransferase 3A OS=Mus musculus GN=Dnmt3a PE=1 SV=2	6	6
TRUE	Old_Native / Young_Native	Old_Native	Young_Native	95	P18654	690938	624046	-0.146906	0.146906	-9.68145	0.903185	0	1.9023e-07	1.56072e-06	94	0.0389822	P18654	KS6A3_MOUSE	Ribosomal protein S6 kinase alpha-3	Rps6ka3	P18654	Mus musculus	toll-like receptor signaling pathway,protein phosphorylation,apoptotic process,cell cycle,response to lipopolysaccharide,intracellular signal transduction,negative regulation of cysteine-type endopeptidase activity involved in apoptotic process,positive regulation of transcription from RNA polymerase II promoter	magnesium ion binding,protein serine/threonine kinase activity,protein binding,ATP binding,protein kinase binding,cysteine-type endopeptidase inhibitor activity involved in apoptotic process	nucleus,cytoplasm	sp	1	2	uniprot_mouse_proteome	>sp|P18654|KS6A3_MOUSE Ribosomal protein S6 kinase alpha-3 OS=Mus musculus GN=Rps6ka3 PE=1 SV=2	17	19
TRUE	Old_Native / Young_Native	Old_Native	Young_Native	125	Q5SQB0;Q61937	10696621	7968469	-0.424781	0.424781	-25.5048	0.744952	0	1.9022e-07	1.56072e-06	124	0.0750838	Q5SQB0;Q61937	Q5SQB0_MOUSE;NPM_MOUSE	Nucleophosmin	Npm1	Q5SQB0;Q61937	Mus musculus	;ribosomal large subunit export from nucleus,ribosomal small subunit export from nucleus,cleavage in ITS2 between 5.8S rRNA and LSU-rRNA of tricistronic rRNA transcript (SSU-rRNA, 5.8S rRNA, LSU-rRNA),cardiac muscle hypertrophy,DNA repair,nucleosome assembly,rRNA export from nucleus,cell volume homeostasis,nucleocytoplasmic transport,centrosome cycle,cell aging,protein localization,positive regul…	;core promoter binding,RNA polymerase II transcription coactivator activity,p53 binding,transcription coactivator activity,RNA binding,protein kinase inhibitor activity,protein binding,ATP binding,phosphatidylinositol-3,4,5-trisphosphate binding,transcription factor binding,rRNA binding,protein kinase binding,Tat protein binding,activating transcription factor binding,histone binding,protein homo…	;granular component,nucleus,nucleoplasm,nucleolus,cytoplasm,centrosome,cytosol,focal adhesion,large ribosomal subunit,small ribosomal subunit,membrane,nuclear matrix,nuclear speck,intracellular ribonucleoprotein complex,spindle pole centrosome,protein-DNA complex,protein complex	tr;sp	1	1	uniprot_mouse_proteome	>tr|Q5SQB0|Q5SQB0_MOUSE Nucleophosmin OS=Mus musculus GN=Npm1 PE=1 SV=1;>sp|Q61937|NPM_MOUSE Nucleophosmin OS=Mus musculus GN=Npm1 PE=1 SV=1	10	25
TRUE	Old_Native / Young_Native	Old_Native	Young_Native	90	P24369	10837680	9814608	-0.143053	0.143053	-9.43995	0.9056	0	1.92586e-07	1.57431e-06	89	0.0337486	P24369	PPIB_MOUSE	Peptidyl-prolyl cis-trans isomerase B	Ppib	P24369	Mus musculus	protein peptidyl-prolyl isomerization,positive regulation of multicellular organism growth,positive regulation by host of viral process,positive regulation by host of viral genome replication,protein stabilization,bone development,chaperone-mediated protein folding	RNA binding,peptidyl-prolyl cis-trans isomerase activity,protein binding,protein complex binding,RNA polymerase binding,collagen binding	nucleus,endoplasmic reticulum,endoplasmic reticulum lumen,smooth endoplasmic reticulum,focal adhesion,membrane,macromolecular complex,endoplasmic reticulum chaperone complex,melanosome,perinuclear region of cytoplasm,extracellular exosome	sp	1	2	uniprot_mouse_proteome	>sp|P24369|PPIB_MOUSE Peptidyl-prolyl cis-trans isomerase B OS=Mus musculus GN=Ppib PE=1 SV=2	12	18
TRUE	Old_Native / Young_Native	Old_Native	Young_Native	30	A0A1C7CYU8;H9H9R5;P26262	91033	129408	0.507468	0.507468	42.1553	1.42155	0	1.96451e-07	1.60008e-06	29	0.0891788	A0A1C7CYU8;H9H9R5;P26262	A0A1C7CYU8_MOUSE;H9H9R5_MOUSE;KLKB1_MOUSE	MCG119836;Plasma kallikrein;Plasma kallikrein	Klkb1;Cyp4v3;Klkb1	A0A1C7CYU8;H9H9R5;P26262	Mus musculus	oxidation-reduction process;;inflammatory response,blood coagulation, intrinsic pathway,plasminogen activation,fibrinolysis,positive regulation of fibrinolysis	monooxygenase activity,iron ion binding,oxidoreductase activity, acting on paired donors, with incorporation or reduction of molecular oxygen,heme binding;;serine-type endopeptidase activity	;;extracellular space,extracellular exosome	tr;tr;sp	1	1;2;2	uniprot_mouse_proteome	>tr|A0A1C7CYU8|A0A1C7CYU8_MOUSE MCG119836 OS=Mus musculus GN=Klkb1 PE=1 SV=1;>tr|H9H9R5|H9H9R5_MOUSE Plasma kallikrein OS=Mus musculus GN=Cyp4v3 PE=1 SV=2;>sp|P26262|KLKB1_MOUSE Plasma kallikrein OS=Mus musculus GN=Klkb1 PE=1 SV=2	6	6
TRUE	Old_Native / Young_Native	Old_Native	Young_Native	35	Q62009;Q62009-2;Q62009-3;Q62009-4;Q62009-5	110931	214243	0.949581	0.949581	93.1312	1.93131	0	2.03919e-07	1.65491e-06	34	0.159642	Q62009;Q62009-2;Q62009-3;Q62009-4;Q62009-5	POSTN_MOUSE	Periostin;Isoform 2 of Periostin;Isoform 3 of Periostin;Isoform 4 of Periostin;Isoform 5 of Periostin	Postn	Q62009;Q62009-2;Q62009-3;Q62009-4;Q62009-5	Mus musculus	response to hypoxia,negative regulation of cell-matrix adhesion,regulation of systemic arterial blood pressure,cell adhesion,regulation of Notch signaling pathway,response to mechanical stimulus,tissue development,response to muscle activity,positive regulation of smooth muscle cell migration,extracellular matrix organization,response to estradiol,cellular response to fibroblast growth factor sti…	heparin binding,metal ion binding;;;;	proteinaceous extracellular matrix,extracellular space,trans-Golgi network,extracellular matrix,neuromuscular junction;;;;	sp	1;;;;	2;;;;	uniprot_mouse_proteome	>sp|Q62009|POSTN_MOUSE Periostin OS=Mus musculus GN=Postn PE=1 SV=2;>sp|Q62009-2|POSTN_MOUSE Isoform 2 of Periostin OS=Mus musculus GN=Postn;>sp|Q62009-3|POSTN_MOUSE Isoform 3 of Periostin OS=Mus musculus GN=Postn;>sp|Q62009-4|POSTN_MOUSE Isoform 4 of Periostin OS=Mus musculus GN=Postn;>sp|Q62009-5|POSTN_MOUSE Isoform 5 of Periostin OS=Mus musculus GN=Postn	7	7
TRUE	Old_Native / Young_Native	Old_Native	Young_Native	20	Q8BVA0;Q99P91	72061.2	281301	1.96482	1.96482	290.364	3.90364	0	2.09058e-07	1.69051e-06	19	0.314614	Q8BVA0;Q99P91	Q8BVA0_MOUSE;GPNMB_MOUSE	Transmembrane glycoprotein NMB	Gpnmb	Q8BVA0;Q99P91	Mus musculus	;osteoblast differentiation,negative regulation of cytokine production,positive regulation of protein phosphorylation,cell adhesion,signal transduction,cell-cell signaling,regulation of receptor activity,bone mineralization,positive regulation of cell migration,positive regulation of protein autophosphorylation,negative regulation of tumor necrosis factor production,regulation of tissue remodelin…	;integrin binding,heparin binding,syndecan binding,receptor agonist activity	;integral component of plasma membrane,endomembrane system,integral component of membrane,cytoplasmic vesicle membrane,cytoplasmic vesicle,melanosome	tr;sp	1	1;2	uniprot_mouse_proteome	>tr|Q8BVA0|Q8BVA0_MOUSE Transmembrane glycoprotein NMB OS=Mus musculus GN=Gpnmb PE=1 SV=1;>sp|Q99P91|GPNMB_MOUSE Transmembrane glycoprotein NMB OS=Mus musculus GN=Gpnmb PE=1 SV=2	3	4
TRUE	Old_Native / Young_Native	Old_Native	Young_Native	75	P70441	1.11914e+06	1.69635e+06	0.600042	0.600042	51.5761	1.51576	0	2.13732e-07	1.72211e-06	74	0.114402	P70441	NHRF1_MOUSE	Na(+)/H(+) exchange regulatory cofactor NHE-RF1	Slc9a3r1	P70441	Mus musculus	renal sodium ion transport,nuclear migration,adenylate cyclase-activating dopamine receptor signaling pathway,sensory perception of sound,negative regulation of cell proliferation,regulation of cell shape,regulation of cell size,negative regulation of platelet-derived growth factor receptor signaling pathway,negative regulation of sodium ion transport,negative regulation of phosphatidylinositol 3…	receptor binding,protein binding,beta-catenin binding,chloride channel regulator activity,phosphatase binding,PDZ domain binding,beta-2 adrenergic receptor binding,protein complex binding,protein complex scaffold,protein self-association,myosin II binding,dopamine receptor binding,growth factor receptor binding	ruffle,cytoplasm,microvillus,endomembrane system,membrane,apical plasma membrane,filopodium,brush border membrane,microvillus membrane,vesicle,stereocilium,stereocilium tip,membrane raft,apical part of cell,perinuclear region of cytoplasm,extracellular exosome,cell periphery,sperm midpiece	sp	1	3	uniprot_mouse_proteome	>sp|P70441|NHRF1_MOUSE Na(+)/H(+) exchange regulatory cofactor NHE-RF1 OS=Mus musculus GN=Slc9a3r1 PE=1 SV=3	13	15
TRUE	Old_Native / Young_Native	Old_Native	Young_Native	50	B2RUF0	1.53112e+06	1.09986e+06	-0.47727	0.47727	-28.1664	0.718336	0	2.20284e-07	1.76857e-06	49	0.156248	B2RUF0	B2RUF0_MOUSE	Y box protein 2	Ybx2	B2RUF0	Mus musculus				tr	1	1	uniprot_mouse_proteome	>tr|B2RUF0|B2RUF0_MOUSE Y box protein 2 OS=Mus musculus GN=Ybx2 PE=1 SV=1	8	10
TRUE	Old_Native / Young_Native	Old_Native	Young_Native	85	P52196	7.74922e+06	9360126	0.272478	0.272478	20.788	1.20788	0	2.3082e-07	1.84656e-06	84	0.0422453	P52196	THTR_MOUSE	Thiosulfate sulfurtransferase	Tst	P52196	Mus musculus	epithelial cell differentiation,rRNA import into mitochondrion,rRNA transport	thiosulfate sulfurtransferase activity,5S rRNA binding	extracellular space,mitochondrion,mitochondrial inner membrane,mitochondrial matrix,extracellular exosome	sp	1	3	uniprot_mouse_proteome	>sp|P52196|THTR_MOUSE Thiosulfate sulfurtransferase OS=Mus musculus GN=Tst PE=1 SV=3	13	17
TRUE	Old_Native / Young_Native	Old_Native	Young_Native	110	P70336;P70336-2	504275	617084	0.291257	0.291257	22.3706	1.22371	0	2.33628e-07	1.85582e-06	109	0.0494668	P70336;P70336-2	ROCK2_MOUSE	Rho-associated protein kinase 2;Isoform 2 of Rho-associated protein kinase 2	Rock2	P70336;P70336-2	Mus musculus	neural tube closure,positive regulation of protein phosphorylation,protein phosphorylation,smooth muscle contraction,I-kappaB kinase/NF-kappaB signaling,Rho protein signal transduction,extrinsic apoptotic signaling pathway via death domain receptors,positive regulation of endothelial cell migration,positive regulation of gene expression,positive regulation of centrosome duplication,negative regul…	RNA binding,protein kinase activity,protein serine/threonine kinase activity,protein binding,ATP binding,Rho GTPase binding,metal ion binding,Rho-dependent protein serine/threonine kinase activity;	nucleus,centrosome,cytosol,plasma membrane,spindle pole centrosome,cytoplasmic ribonucleoprotein granule;	sp	1;	1;	uniprot_mouse_proteome	>sp|P70336|ROCK2_MOUSE Rho-associated protein kinase 2 OS=Mus musculus GN=Rock2 PE=1 SV=1;>sp|P70336-2|ROCK2_MOUSE Isoform 2 of Rho-associated protein kinase 2 OS=Mus musculus GN=Rock2	22	22
TRUE	Old_Native / Young_Native	Old_Native	Young_Native	115	Q64737	1.0631e+06	806650	-0.398257	0.398257	-24.1226	0.758774	0	2.33137e-07	1.85582e-06	114	0.0619254	Q64737	PUR2_MOUSE	Trifunctional purine biosynthetic protein adenosine-3	Gart	Q64737	Mus musculus	brainstem development,'de novo' IMP biosynthetic process,glycine metabolic process,purine nucleobase biosynthetic process,response to organic substance,response to inorganic substance,cerebellum development,cerebral cortex development,tetrahydrofolate biosynthetic process	phosphoribosylamine-glycine ligase activity,phosphoribosylformylglycinamidine cyclo-ligase activity,phosphoribosylglycinamide formyltransferase activity,ATP binding,metal ion binding	cytoplasm,extracellular exosome	sp	1	3	uniprot_mouse_proteome	>sp|Q64737|PUR2_MOUSE Trifunctional purine biosynthetic protein adenosine-3 OS=Mus musculus GN=Gart PE=1 SV=3	19	23
TRUE	Old_Native / Young_Native	Old_Native	Young_Native	95	Q9DBC7	1278894	1.93972e+06	0.60095	0.60095	51.6715	1.51672	0	2.37551e-07	1.88034e-06	94	0.129392	Q9DBC7	KAP0_MOUSE	cAMP-dependent protein kinase type I-alpha regulatory subunit	Prkar1a	Q9DBC7	Mus musculus	mesoderm formation,protein phosphorylation,negative regulation of protein kinase activity,female meiotic division,heart development,cell proliferation,animal organ morphogenesis,sarcomere organization,negative regulation of meiotic nuclear division,negative regulation of activated T cell proliferation,cardiac muscle cell proliferation,negative regulation of cAMP-dependent protein kinase activity	cAMP-dependent protein kinase inhibitor activity,protein binding,cAMP-dependent protein kinase regulator activity,protein domain specific binding,cAMP binding,ubiquitin protein ligase binding,protein kinase A catalytic subunit binding	cytoplasm,axoneme,cAMP-dependent protein kinase complex,membrane,nucleotide-activated protein kinase complex,neuromuscular junction,protein complex,plasma membrane raft,immunological synapse	sp	1	3	uniprot_mouse_proteome	>sp|Q9DBC7|KAP0_MOUSE cAMP-dependent protein kinase type I-alpha regulatory subunit OS=Mus musculus GN=Prkar1a PE=1 SV=3	16	19
TRUE	Old_Native / Young_Native	Old_Native	Young_Native	55	Q9CQR2	4763523	4315623	-0.14246	0.14246	-9.4027	0.905973	0	2.4684e-07	1.94701e-06	54	0.0652315	Q9CQR2	RS21_MOUSE	40S ribosomal protein S21	Rps21	Q9CQR2	Mus musculus	endonucleolytic cleavage in ITS1 to separate SSU-rRNA from 5.8S rRNA and LSU-rRNA from tricistronic rRNA transcript (SSU-rRNA, 5.8S rRNA, LSU-rRNA),endonucleolytic cleavage to generate mature 3'-end of SSU-rRNA from (SSU-rRNA, 5.8S rRNA, LSU-rRNA),translation	RNA binding,structural constituent of ribosome,ribosome binding,protein N-terminus binding	small ribosomal subunit,cytosolic small ribosomal subunit	sp	1	1	uniprot_mouse_proteome	>sp|Q9CQR2|RS21_MOUSE 40S ribosomal protein S21 OS=Mus musculus GN=Rps21 PE=1 SV=1	4	11
TRUE	Old_Native / Young_Native	Old_Native	Young_Native	30	P27601	445985	527940	0.243379	0.243379	18.3762	1.18376	0	2.47854e-07	1.94816e-06	29	0.0352871	P27601	GNA13_MOUSE	Guanine nucleotide-binding protein subunit alpha-13	Gna13	P27601	Mus musculus	angiogenesis,patterning of blood vessels,in utero embryonic development,G-protein coupled receptor signaling pathway,adenylate cyclase-activating G-protein coupled receptor signaling pathway,positive regulation of cytosolic calcium ion concentration,Rho protein signal transduction,regulation of cell shape,cell differentiation,platelet activation,regulation of cell migration,activation of phosphol…	GTPase activity,signal transducer activity,protein binding,GTP binding,G-protein beta/gamma-subunit complex binding,type 1 angiotensin receptor binding,D5 dopamine receptor binding,metal ion binding	nucleus,cytosol,heterotrimeric G-protein complex,plasma membrane,focal adhesion,membrane,brush border membrane,melanosome,extracellular exosome	sp	1	1	uniprot_mouse_proteome	>sp|P27601|GNA13_MOUSE Guanine nucleotide-binding protein subunit alpha-13 OS=Mus musculus GN=Gna13 PE=1 SV=1	6	6
TRUE	Old_Native / Young_Native	Old_Native	Young_Native	205	F8VQ40;P19137	1.93884e+06	2.18382e+06	0.171659	0.171659	12.6353	1.12635	0	2.52258e-07	1.96901e-06	204	0.0480801	F8VQ40;P19137	F8VQ40_MOUSE;LAMA1_MOUSE	Laminin subunit alpha-1	Lama1	F8VQ40;P19137	Mus musculus	;morphogenesis of an epithelial sheet,protein phosphorylation,receptor-mediated endocytosis,cell adhesion,cell surface receptor signaling pathway,axon guidance,tissue development,extracellular matrix disassembly,regulation of cell adhesion,extracellular matrix organization,regulation of cell migration,neuron projection development,establishment of epithelial cell apical/basal polarity,regulation …	;receptor binding,extracellular matrix structural constituent,protein binding,protein C-terminus binding,glycosphingolipid binding	;extracellular region,proteinaceous extracellular matrix,basement membrane,basal lamina,laminin-1 complex,laminin-3 complex,extracellular space,cell-cell junction,membrane,extracellular matrix,laminin complex	tr;sp	1	1	uniprot_mouse_proteome	>tr|F8VQ40|F8VQ40_MOUSE Laminin subunit alpha-1 OS=Mus musculus GN=Lama1 PE=1 SV=1;>sp|P19137|LAMA1_MOUSE Laminin subunit alpha-1 OS=Mus musculus GN=Lama1 PE=1 SV=1	39	41
TRUE	Old_Native / Young_Native	Old_Native	Young_Native	40	G3X977;Q61703	633409	828658	0.387639	0.387639	30.8251	1.30825	0	2.51729e-07	1.96901e-06	39	0.0703054	G3X977;Q61703	G3X977_MOUSE;ITIH2_MOUSE	Inter-alpha trypsin inhibitor, heavy chain 2;Inter-alpha-trypsin inhibitor heavy chain H2	Itih2	G3X977;Q61703	Mus musculus	;negative regulation of endopeptidase activity,hyaluronan metabolic process	;serine-type endopeptidase inhibitor activity	;extracellular space,extracellular exosome,blood microparticle	tr;sp	1	1	uniprot_mouse_proteome	>tr|G3X977|G3X977_MOUSE Inter-alpha trypsin inhibitor, heavy chain 2 OS=Mus musculus GN=Itih2 PE=1 SV=1;>sp|Q61703|ITIH2_MOUSE Inter-alpha-trypsin inhibitor heavy chain H2 OS=Mus musculus GN=Itih2 PE=1 SV=1	8	8
TRUE	Old_Native / Young_Native	Old_Native	Young_Native	45	Q3TLP5	892792	1.11326e+06	0.318398	0.318398	24.6945	1.24695	0	2.53787e-07	1.97409e-06	44	0.0605596	Q3TLP5	ECHD2_MOUSE	Enoyl-CoA hydratase domain-containing protein 2, mitochondrial	Echdc2	Q3TLP5	Mus musculus	fatty acid beta-oxidation	enoyl-CoA hydratase activity	mitochondrion	sp	1	2	uniprot_mouse_proteome	>sp|Q3TLP5|ECHD2_MOUSE Enoyl-CoA hydratase domain-containing protein 2, mitochondrial OS=Mus musculus GN=Echdc2 PE=1 SV=2	6	9
TRUE	Old_Native / Young_Native	Old_Native	Young_Native	145	E9PV24;E9PV24-2	5265721	6679668	0.343145	0.343145	26.8519	1.26852	0	2.628e-07	2.03715e-06	144	0.0597785	E9PV24;E9PV24-2	FIBA_MOUSE	Fibrinogen alpha chain;Isoform 2 of Fibrinogen alpha chain	Fga	E9PV24;E9PV24-2	Mus musculus	adaptive immune response,protein complex assembly,cell-matrix adhesion,signal transduction,blood coagulation,plasminogen activation,positive regulation of heterotypic cell-cell adhesion,fibrinolysis,induction of bacterial agglutination,cellular protein complex assembly,innate immune response,positive regulation of vasoconstriction,positive regulation of exocytosis,positive regulation of protein s…	structural molecule activity,protein binding, bridging,metal ion binding,receptor binding,cell adhesion molecule binding;	fibrinogen complex,extracellular space,cell cortex,external side of plasma membrane,cell surface,platelet alpha granule,extracellular exosome,blood microparticle,extracellular vesicle;	sp	1;	1;	uniprot_mouse_proteome	>sp|E9PV24|FIBA_MOUSE Fibrinogen alpha chain OS=Mus musculus GN=Fga PE=1 SV=1;>sp|E9PV24-2|FIBA_MOUSE Isoform 2 of Fibrinogen alpha chain OS=Mus musculus GN=Fga	23	29
TRUE	Old_Native / Young_Native	Old_Native	Young_Native	25	Q9WV91	133979	184699	0.463163	0.463163	37.8561	1.37856	0	2.75934e-07	2.13161e-06	24	0.0698658	Q9WV91	FPRP_MOUSE	Prostaglandin F2 receptor negative regulator	Ptgfrn	Q9WV91	Mus musculus	lipid particle organization		endoplasmic reticulum membrane,Golgi apparatus,plasma membrane,cell surface,integral component of membrane	sp	1	2	uniprot_mouse_proteome	>sp|Q9WV91|FPRP_MOUSE Prostaglandin F2 receptor negative regulator OS=Mus musculus GN=Ptgfrn PE=1 SV=2	5	5
TRUE	Old_Native / Young_Native	Old_Native	Young_Native	110	B9EKP8;Q3UTJ2-2	1476932	1741507	0.237733	0.237733	17.9138	1.17914	0	2.83332e-07	2.18127e-06	109	0.0390053	B9EKP8;Q3UTJ2-2	B9EKP8_MOUSE;SRBS2_MOUSE	Sorbin and SH3 domain-containing protein 2;Isoform 2 of Sorbin and SH3 domain-containing protein 2	Sorbs2	B9EKP8;Q3UTJ2-2	Mus musculus	;	;	;	tr;sp	1;	1;	uniprot_mouse_proteome	>tr|B9EKP8|B9EKP8_MOUSE Sorbin and SH3 domain-containing protein 2 OS=Mus musculus GN=Sorbs2 PE=1 SV=1;>sp|Q3UTJ2-2|SRBS2_MOUSE Isoform 2 of Sorbin and SH3 domain-containing protein 2 OS=Mus musculus GN=Sorbs2	22	22
TRUE	Old_Native / Young_Native	Old_Native	Young_Native	45	P30412	820748	561364	-0.548004	0.548004	-31.6034	0.683966	0	3.1778e-07	2.43812e-06	44	0.130009	P30412	PPIC_MOUSE	Peptidyl-prolyl cis-trans isomerase C	Ppic	P30412	Mus musculus	protein peptidyl-prolyl isomerization,protein folding	peptidyl-prolyl cis-trans isomerase activity,protein binding,cyclosporin A binding	cytoplasm,extracellular exosome	sp	1	1	uniprot_mouse_proteome	>sp|P30412|PPIC_MOUSE Peptidyl-prolyl cis-trans isomerase C OS=Mus musculus GN=Ppic PE=1 SV=1	6	9
TRUE	Old_Native / Young_Native	Old_Native	Young_Native	80	Q9CZD3	907051	784825	-0.208812	0.208812	-13.475	0.86525	0	3.6586e-07	2.79746e-06	79	0.0397499	Q9CZD3	SYG_MOUSE	Glycine--tRNA ligase	Gars	Q9CZD3	Mus musculus	glycyl-tRNA aminoacylation,diadenosine tetraphosphate biosynthetic process,mitochondrial glycyl-tRNA aminoacylation	bis(5'-nucleosyl)-tetraphosphatase (asymmetrical) activity,glycine-tRNA ligase activity,protein binding,ATP binding,identical protein binding,protein dimerization activity	mitochondrion,cytosol,secretory granule,axon,extracellular exosome	sp	1	1	uniprot_mouse_proteome	>sp|Q9CZD3|SYG_MOUSE Glycine--tRNA ligase OS=Mus musculus GN=Gars PE=1 SV=1	15	16
TRUE	Old_Native / Young_Native	Old_Native	Young_Native	130	Q8R1B4	2.13121e+06	1.84653e+06	-0.206861	0.206861	-13.358	0.86642	0	4.25651e-07	3.2436e-06	129	0.0425774	Q8R1B4	EIF3C_MOUSE	Eukaryotic translation initiation factor 3 subunit C	Eif3c	Q8R1B4	Mus musculus	translational initiation,positive regulation of translation,positive regulation of mRNA binding	RNA binding,translation initiation factor activity,translation initiation factor binding,ribosome binding	eukaryotic translation initiation factor 3 complex,eukaryotic translation initiation factor 3 complex, eIF3m	sp	1	1	uniprot_mouse_proteome	>sp|Q8R1B4|EIF3C_MOUSE Eukaryotic translation initiation factor 3 subunit C OS=Mus musculus GN=Eif3c PE=1 SV=1	22	26
TRUE	Old_Native / Young_Native	Old_Native	Young_Native	75	Q9Z1Q5	3.22081e+06	3833503	0.251241	0.251241	19.023	1.19023	0	4.47663e-07	3.39982e-06	74	0.0379757	Q9Z1Q5	CLIC1_MOUSE	Chloride intracellular channel protein 1	Clic1	Q9Z1Q5	Mus musculus	chloride transport,regulation of ion transmembrane transport,positive regulation of osteoblast differentiation,regulation of cell cycle,regulation of mitochondrial membrane potential,platelet aggregation,chloride transmembrane transport,glutathione metabolic process	voltage-gated ion channel activity,chloride channel activity,cadherin binding,glutathione transferase activity	extracellular space,nucleus,nuclear envelope,cytoplasm,mitochondrion,plasma membrane,membrane,nuclear membrane,vesicle,chloride channel complex,perinuclear region of cytoplasm,extracellular exosome,blood microparticle	sp	1	3	uniprot_mouse_proteome	>sp|Q9Z1Q5|CLIC1_MOUSE Chloride intracellular channel protein 1 OS=Mus musculus GN=Clic1 PE=1 SV=3	12	15
TRUE	Old_Native / Young_Native	Old_Native	Young_Native	165	E9PWE8	4.91974e+06	4.39222e+06	-0.163631	0.163631	-10.7225	0.892775	0	4.49573e-07	3.40283e-06	164	0.0633825	E9PWE8	E9PWE8_MOUSE	Dihydropyrimidinase-related protein 3	Dpysl3	E9PWE8	Mus musculus				tr	1	1	uniprot_mouse_proteome	>tr|E9PWE8|E9PWE8_MOUSE Dihydropyrimidinase-related protein 3 OS=Mus musculus GN=Dpysl3 PE=1 SV=1	28	33
TRUE	Old_Native / Young_Native	Old_Native	Young_Native	45	Q9JJF0	403202	236782	-0.76794	0.76794	-41.2745	0.587255	0	4.51543e-07	3.40627e-06	44	0.160135	Q9JJF0	NP1L5_MOUSE	Nucleosome assembly protein 1-like 5	Nap1l5	Q9JJF0	Mus musculus	nucleosome assembly,biological_process	molecular_function	cellular_component,nucleus	sp	1	1	uniprot_mouse_proteome	>sp|Q9JJF0|NP1L5_MOUSE Nucleosome assembly protein 1-like 5 OS=Mus musculus GN=Nap1l5 PE=1 SV=1	5	9
TRUE	Old_Native / Young_Native	Old_Native	Young_Native	50	Q8BVY0	583599	396167	-0.558868	0.558868	-32.1165	0.678835	0	4.83861e-07	3.63786e-06	49	0.110287	Q8BVY0	RL1D1_MOUSE	Ribosomal L1 domain-containing protein 1	Rsl1d1	Q8BVY0	Mus musculus	maturation of LSU-rRNA,osteoblast differentiation,regulation of protein localization,regulation of apoptotic process,regulation of cellular senescence,translation	RNA binding,mRNA 3'-UTR binding,protein binding,cadherin binding,mRNA 5'-UTR binding	nucleolus,membrane,90S preribosome,cytosolic large ribosomal subunit	sp	1	1	uniprot_mouse_proteome	>sp|Q8BVY0|RL1D1_MOUSE Ribosomal L1 domain-containing protein 1 OS=Mus musculus GN=Rsl1d1 PE=1 SV=1	8	10
TRUE	Old_Native / Young_Native	Old_Native	Young_Native	75	Q9Z1J3;Q9Z1J3-2	622332	768432	0.304232	0.304232	23.4761	1.23476	0	5.13347e-07	3.84668e-06	74	0.0556923	Q9Z1J3;Q9Z1J3-2	NFS1_MOUSE	Cysteine desulfurase, mitochondrial;Isoform Cytoplasmic of Cysteine desulfurase, mitochondrial	Nfs1	Q9Z1J3;Q9Z1J3-2	Mus musculus	Mo-molybdopterin cofactor biosynthetic process,iron incorporation into metallo-sulfur cluster,[2Fe-2S] cluster assembly;	pyridoxal phosphate binding,cysteine desulfurase activity,protein homodimerization activity,metal ion binding,iron-sulfur cluster binding;	nucleus,nucleoplasm,mitochondrion,mitochondrial matrix,cytosol;	sp	1;	3;	uniprot_mouse_proteome	>sp|Q9Z1J3|NFS1_MOUSE Cysteine desulfurase, mitochondrial OS=Mus musculus GN=Nfs1 PE=1 SV=3;>sp|Q9Z1J3-2|NFS1_MOUSE Isoform Cytoplasmic of Cysteine desulfurase, mitochondrial OS=Mus musculus GN=Nfs1	12	15
TRUE	Old_Native / Young_Native	Old_Native	Young_Native	130	Q8VCW8	2758170	3370908	0.289426	0.289426	22.2154	1.22215	0	5.26531e-07	3.92933e-06	129	0.0570037	Q8VCW8	ACSF2_MOUSE	Acyl-CoA synthetase family member 2, mitochondrial	Acsf2	Q8VCW8	Mus musculus	fatty acid metabolic process,biological_process	molecular_function,ATP binding,ligase activity	mitochondrion	sp	1	1	uniprot_mouse_proteome	>sp|Q8VCW8|ACSF2_MOUSE Acyl-CoA synthetase family member 2, mitochondrial OS=Mus musculus GN=Acsf2 PE=1 SV=1	20	26
TRUE	Old_Native / Young_Native	Old_Native	Young_Native	30	Q8CGB6;Q8CGB6-2;Q8CGB6-3;Q8CGB6-4	106782	147414	0.465206	0.465206	38.0515	1.38051	0	5.27872e-07	3.92933e-06	29	0.0859516	Q8CGB6;Q8CGB6-2;Q8CGB6-3;Q8CGB6-4	TNS2_MOUSE	Tensin-2;Isoform 2 of Tensin-2;Isoform 3 of Tensin-2;Isoform 4 of Tensin-2	Tns2	Q8CGB6;Q8CGB6-2;Q8CGB6-3;Q8CGB6-4	Mus musculus	kidney development,protein dephosphorylation,negative regulation of cell proliferation,response to muscle activity,cellular homeostasis,collagen metabolic process,multicellular organism growth,intracellular signal transduction,multicellular organismal homeostasis;;;	phosphoprotein phosphatase activity,receptor binding,kinase binding,protein kinase binding,metal ion binding;;;	intracellular,plasma membrane,focal adhesion;;;	sp	1;;;	1;;;	uniprot_mouse_proteome	>sp|Q8CGB6|TNS2_MOUSE Tensin-2 OS=Mus musculus GN=Tns2 PE=1 SV=1;>sp|Q8CGB6-2|TNS2_MOUSE Isoform 2 of Tensin-2 OS=Mus musculus GN=Tns2;>sp|Q8CGB6-3|TNS2_MOUSE Isoform 3 of Tensin-2 OS=Mus musculus GN=Tns2;>sp|Q8CGB6-4|TNS2_MOUSE Isoform 4 of Tensin-2 OS=Mus musculus GN=Tns2	6	6
TRUE	Old_Native / Young_Native	Old_Native	Young_Native	100	Q1HFZ0	579029	474699	-0.286623	0.286623	-18.0181	0.819819	0	5.66488e-07	4.20286e-06	99	0.0558452	Q1HFZ0	NSUN2_MOUSE	tRNA (cytosine(34)-C(5))-methyltransferase	Nsun2	Q1HFZ0	Mus musculus	spermatid development,tRNA methylation,meiotic cell cycle checkpoint,hair follicle maturation,cell division	tRNA binding,RNA binding,tRNA (cytosine-5-)-methyltransferase activity	nucleus,nucleolus,cytoplasm,spindle,chromatoid body	sp	1	2	uniprot_mouse_proteome	>sp|Q1HFZ0|NSUN2_MOUSE tRNA (cytosine(34)-C(5))-methyltransferase OS=Mus musculus GN=Nsun2 PE=1 SV=2	19	20
TRUE	Old_Native / Young_Native	Old_Native	Young_Native	140	Q64514;Q64514-2	1.01467e+06	910672	-0.156002	0.156002	-10.2491	0.897509	0	5.74863e-07	4.25096e-06	139	0.0329962	Q64514;Q64514-2	TPP2_MOUSE	Tripeptidyl-peptidase 2;Isoform Short of Tripeptidyl-peptidase 2	Tpp2	Q64514;Q64514-2	Mus musculus	proteolysis;	aminopeptidase activity,serine-type endopeptidase activity,tripeptidyl-peptidase activity,peptide binding;	nucleoplasm,cytosol,nuclear body;	sp	1;	3;	uniprot_mouse_proteome	>sp|Q64514|TPP2_MOUSE Tripeptidyl-peptidase 2 OS=Mus musculus GN=Tpp2 PE=1 SV=3;>sp|Q64514-2|TPP2_MOUSE Isoform Short of Tripeptidyl-peptidase 2 OS=Mus musculus GN=Tpp2	26	28
TRUE	Old_Native / Young_Native	Old_Native	Young_Native	40	Q6P542	606158	517226	-0.228897	0.228897	-14.6713	0.853287	0	5.94412e-07	4.38111e-06	39	0.042926	Q6P542	ABCF1_MOUSE	ATP-binding cassette sub-family F member 1	Abcf1	Q6P542	Mus musculus	translational initiation,positive regulation of translation,ribosome biogenesis	RNA binding,ATP binding,translation activator activity,ATPase activity,ribosome binding	nuclear envelope,nucleoplasm,cytoplasm,cytosol,membrane,polysomal ribosome	sp	1	1	uniprot_mouse_proteome	>sp|Q6P542|ABCF1_MOUSE ATP-binding cassette sub-family F member 1 OS=Mus musculus GN=Abcf1 PE=1 SV=1	8	8
TRUE	Old_Native / Young_Native	Old_Native	Young_Native	385	P58252	18951200	16700821	-0.18237	0.18237	-11.8746	0.881254	0	6.13848e-07	4.49101e-06	384	0.0578207	P58252	EF2_MOUSE	Elongation factor 2	Eef2	P58252	Mus musculus	hematopoietic progenitor cell differentiation,response to ischemia,skeletal muscle contraction,translational elongation,aging,glial cell proliferation,response to estradiol,response to endoplasmic reticulum stress,skeletal muscle cell differentiation,response to drug,response to hydrogen peroxide,response to ethanol,positive regulation of translation,response to folic acid,cellular response to br…	p53 binding,RNA binding,translation elongation factor activity,GTPase activity,protein binding,GTP binding,5S rRNA binding,protein kinase binding,ribosome binding,cadherin binding,actin filament binding	cytoplasm,cytosol,polysome,plasma membrane,membrane,aggresome,intracellular ribonucleoprotein complex,extracellular matrix,polysomal ribosome,membrane raft,extracellular exosome,nucleus	sp	1	2	uniprot_mouse_proteome	>sp|P58252|EF2_MOUSE Elongation factor 2 OS=Mus musculus GN=Eef2 PE=1 SV=2	46	77
TRUE	Old_Native / Young_Native	Old_Native	Young_Native	115	Q5SUR0	1.2475e+06	1.04834e+06	-0.250941	0.250941	-15.9652	0.840348	0	6.15316e-07	4.49101e-06	114	0.0470122	Q5SUR0	PUR4_MOUSE	Phosphoribosylformylglycinamidine synthase	Pfas	Q5SUR0	Mus musculus	'de novo' IMP biosynthetic process,glutamine metabolic process,response to drug	phosphoribosylformylglycinamidine synthase activity,ATP binding,metal ion binding	cytoplasm,extracellular exosome	sp	1	1	uniprot_mouse_proteome	>sp|Q5SUR0|PUR4_MOUSE Phosphoribosylformylglycinamidine synthase OS=Mus musculus GN=Pfas PE=1 SV=1	23	23
TRUE	Old_Native / Young_Native	Old_Native	Young_Native	75	P17918	2.57582e+06	1.57316e+06	-0.711366	0.711366	-38.9259	0.610741	0	6.12887e-07	4.49101e-06	74	0.161387	P17918	PCNA_MOUSE	Proliferating cell nuclear antigen	Pcna	P17918	Mus musculus	negative regulation of transcription from RNA polymerase II promoter,leading strand elongation,base-excision repair, gap-filling,mismatch repair,translesion synthesis,replication fork processing,positive regulation of deoxyribonuclease activity,cellular response to UV,positive regulation of DNA repair,positive regulation of DNA replication,cellular response to xenobiotic stimulus,mitotic telomere…	purine-specific mismatch base pair DNA N-glycosylase activity,chromatin binding,damaged DNA binding,protein binding,enzyme binding,DNA polymerase processivity factor activity,receptor tyrosine kinase binding,dinucleotide insertion or deletion binding,MutLalpha complex binding,histone acetyltransferase binding,identical protein binding,DNA polymerase binding	cyclin-dependent protein kinase holoenzyme complex,nuclear chromosome, telomeric region,intracellular,nucleus,nuclear lamina,nucleoplasm,replication fork,centrosome,nuclear body,nuclear replication fork,PCNA complex,extracellular exosome,PCNA-p21 complex	sp	1	2	uniprot_mouse_proteome	>sp|P17918|PCNA_MOUSE Proliferating cell nuclear antigen OS=Mus musculus GN=Pcna PE=1 SV=2	11	15
TRUE	Old_Native / Young_Native	Old_Native	Young_Native	75	Q61753	1.39661e+06	928232	-0.589371	0.589371	-33.5367	0.664633	0	6.18699e-07	4.50108e-06	74	0.156457	Q61753	SERA_MOUSE	D-3-phosphoglycerate dehydrogenase	Phgdh	Q61753	Mus musculus	glutamine metabolic process,glycine metabolic process,L-serine metabolic process,L-serine biosynthetic process,threonine metabolic process,gamma-aminobutyric acid metabolic process,regulation of gene expression,taurine metabolic process,spinal cord development,glial cell development,neural tube development,neurogenesis,neuron projection development,oxidation-reduction process,G1 to G0 transition	phosphoglycerate dehydrogenase activity,NAD binding	myelin sheath,extracellular exosome	sp	1	3	uniprot_mouse_proteome	>sp|Q61753|SERA_MOUSE D-3-phosphoglycerate dehydrogenase OS=Mus musculus GN=Phgdh PE=1 SV=3	12	15
TRUE	Old_Native / Young_Native	Old_Native	Young_Native	35	G3X8X6;Q62230	111150	179554	0.691917	0.691917	61.5428	1.61543	0	6.31014e-07	4.57587e-06	34	0.132974	G3X8X6;Q62230	G3X8X6_MOUSE;SN_MOUSE	Sialic acid binding Ig-like lectin 1, sialoadhesin, isoform CRA_b;Sialoadhesin	Siglec1	G3X8X6;Q62230	Mus musculus	;endocytosis,cell adhesion,positive regulation of T cell apoptotic process,positive regulation of extrinsic apoptotic signaling pathway	;protein binding,carbohydrate binding	;extracellular region,plasma membrane,integral component of membrane	tr;sp	1	1;2	uniprot_mouse_proteome	>tr|G3X8X6|G3X8X6_MOUSE Sialic acid binding Ig-like lectin 1, sialoadhesin, isoform CRA_b OS=Mus musculus GN=Siglec1 PE=1 SV=1;>sp|Q62230|SN_MOUSE Sialoadhesin OS=Mus musculus GN=Siglec1 PE=1 SV=2	7	7
TRUE	Old_Native / Young_Native	Old_Native	Young_Native	145	Q9QUR6	1.50239e+06	1.28837e+06	-0.221716	0.221716	-14.2455	0.857545	0	6.41505e-07	4.63698e-06	144	0.0524121	Q9QUR6	PPCE_MOUSE	Prolyl endopeptidase	Prep	Q9QUR6	Mus musculus	proteolysis,protein metabolic process	serine-type endopeptidase activity,serine-type exopeptidase activity	nucleus,cytoplasm,cytosol,membrane	sp	1	1	uniprot_mouse_proteome	>sp|Q9QUR6|PPCE_MOUSE Prolyl endopeptidase OS=Mus musculus GN=Prep PE=1 SV=1	27	29
TRUE	Old_Native / Young_Native	Old_Native	Young_Native	70	Q9CR16	1.58601e+06	1.30834e+06	-0.277672	0.277672	-17.5079	0.824921	0	6.49762e-07	4.68162e-06	69	0.0618768	Q9CR16	PPID_MOUSE	Peptidyl-prolyl cis-trans isomerase D	Ppid	Q9CR16	Mus musculus	negative regulation of transcription from RNA polymerase II promoter,protein peptidyl-prolyl isomerization,protein folding,protein complex assembly,apoptotic process,protein transport,lipid particle organization,regulation of apoptotic process,positive regulation of apoptotic process,positive regulation of viral genome replication,positive regulation of protein secretion,chaperone-mediated protei…	peptidyl-prolyl cis-trans isomerase activity,FK506 binding,transcription factor binding,estrogen receptor binding,Hsp70 protein binding,heat shock protein binding,Hsp90 protein binding	nucleus,nucleoplasm,nucleolus,cytoplasm,cytosol	sp	1	3	uniprot_mouse_proteome	>sp|Q9CR16|PPID_MOUSE Peptidyl-prolyl cis-trans isomerase D OS=Mus musculus GN=Ppid PE=1 SV=3	13	14
TRUE	Old_Native / Young_Native	Old_Native	Young_Native	45	Q20BD0;Q80XR6;Q99020	6633238	5.50275e+06	-0.269561	0.269561	-17.0428	0.829572	0	6.51908e-07	4.68208e-06	44	0.0547306	Q20BD0;Q80XR6;Q99020	Q20BD0_MOUSE;Q80XR6_MOUSE;ROAA_MOUSE	Heterogeneous nuclear ribonucleoprotein A/B	Hnrnpab	Q20BD0;Q80XR6;Q99020	Mus musculus	;;negative regulation of transcription from RNA polymerase II promoter,epithelial to mesenchymal transition,transcription, DNA-templated,positive regulation of transcription, DNA-templated	;;RNA binding,protein binding,transcription factor activity, sequence-specific DNA binding,sequence-specific DNA binding	;;nucleus,nucleoplasm,cytoplasm,intracellular ribonucleoprotein complex,RNA polymerase II transcription factor complex	tr;tr;sp	1	1	uniprot_mouse_proteome	>tr|Q20BD0|Q20BD0_MOUSE Heterogeneous nuclear ribonucleoprotein A/B OS=Mus musculus GN=Hnrnpab PE=1 SV=1;>tr|Q80XR6|Q80XR6_MOUSE Heterogeneous nuclear ribonucleoprotein A/B OS=Mus musculus GN=Hnrnpab PE=1 SV=1;>sp|Q99020|ROAA_MOUSE Heterogeneous nuclear ribonucleoprotein A/B OS=Mus musculus GN=Hnrnpab PE=1 SV=1	8	9
TRUE	Old_Native / Young_Native	Old_Native	Young_Native	60	P70698	572014	462711	-0.305939	0.305939	-19.1084	0.808916	0	6.88544e-07	4.92945e-06	59	0.0649939	P70698	PYRG1_MOUSE	CTP synthase 1	Ctps1	P70698	Mus musculus	CTP biosynthetic process,glutamine metabolic process,T cell proliferation,B cell proliferation,'de novo' CTP biosynthetic process	CTP synthase activity,ATP binding,identical protein binding	membrane	sp	1	2	uniprot_mouse_proteome	>sp|P70698|PYRG1_MOUSE CTP synthase 1 OS=Mus musculus GN=Ctps1 PE=1 SV=2	11	12
TRUE	Old_Native / Young_Native	Old_Native	Young_Native	35	P35980	6861395	5780695	-0.247259	0.247259	-15.7504	0.842496	0	7.08735e-07	5.0579e-06	34	0.0368925	P35980	RL18_MOUSE	60S ribosomal protein L18	Rpl18	P35980	Mus musculus	translation	RNA binding,structural constituent of ribosome	nucleus,nucleolus,endoplasmic reticulum,cytosol,focal adhesion,membrane,cytosolic large ribosomal subunit	sp	1	3	uniprot_mouse_proteome	>sp|P35980|RL18_MOUSE 60S ribosomal protein L18 OS=Mus musculus GN=Rpl18 PE=1 SV=3	6	7
TRUE	Old_Native / Young_Native	Old_Native	Young_Native	20	E9PXM9	173171	47785.2	-1.85756	1.85756	-72.4057	0.275943	0	7.36706e-07	5.24087e-06	19	0.313798	E9PXM9	E9PXM9_MOUSE	Protein Fbxw24	Fbxw24	E9PXM9	Mus musculus	biological_process	molecular_function	cellular_component	tr	4	1	uniprot_mouse_proteome	>tr|E9PXM9|E9PXM9_MOUSE Protein Fbxw24 OS=Mus musculus GN=Fbxw24 PE=4 SV=1	4	4
TRUE	Old_Native / Young_Native	Old_Native	Young_Native	120	P80317	3.34867e+06	2.79384e+06	-0.261339	0.261339	-16.5687	0.834313	0	7.45638e-07	5.28768e-06	119	0.0476134	P80317	TCPZ_MOUSE	T-complex protein 1 subunit zeta	Cct6a	P80317	Mus musculus	'de novo' protein folding,binding of sperm to zona pellucida,positive regulation of telomere maintenance via telomerase,protein stabilization,chaperone-mediated protein folding,toxin transport,positive regulation of establishment of protein localization to telomere,positive regulation of protein localization to Cajal body,positive regulation of telomerase RNA localization to Cajal body	RNA binding,protein binding,ATP binding,protein binding involved in protein folding,unfolded protein binding,WD40-repeat domain binding	acrosomal vesicle,zona pellucida receptor complex,cytosol,chaperonin-containing T-complex,microtubule,extracellular matrix,cell body,extracellular exosome	sp	1	3	uniprot_mouse_proteome	>sp|P80317|TCPZ_MOUSE T-complex protein 1 subunit zeta OS=Mus musculus GN=Cct6a PE=1 SV=3	21	24
TRUE	Old_Native / Young_Native	Old_Native	Young_Native	110	Q8BGH2	1.93086e+06	2.37544e+06	0.298949	0.298949	23.0248	1.23025	0	7.68413e-07	5.43205e-06	109	0.0749537	Q8BGH2	SAM50_MOUSE	Sorting and assembly machinery component 50 homolog	Samm50	Q8BGH2	Mus musculus	mitochondrial respiratory chain complex assembly,cristae formation,protein import into mitochondrial outer membrane	protein binding	mitochondrial sorting and assembly machinery complex,mitochondrion,mitochondrial outer membrane,mitochondrial inner membrane,integral component of membrane,extracellular exosome	sp	1	1	uniprot_mouse_proteome	>sp|Q8BGH2|SAM50_MOUSE Sorting and assembly machinery component 50 homolog OS=Mus musculus GN=Samm50 PE=1 SV=1	19	22
TRUE	Old_Native / Young_Native	Old_Native	Young_Native	30	P01878	205663	395900	0.944854	0.944854	92.4994	1.92499	0	7.81408e-07	5.5066e-06	29	0.308381	P01878	IGHA_MOUSE	Ig alpha chain C region	NaN	P01878	Mus musculus		antigen binding,immunoglobulin receptor binding		sp	1	1	uniprot_mouse_proteome	>sp|P01878|IGHA_MOUSE Ig alpha chain C region OS=Mus musculus PE=1 SV=1	5	6
TRUE	Old_Native / Young_Native	Old_Native	Young_Native	305	P10126	80715648	69968432	-0.206144	0.206144	-13.3149	0.866851	0	8.02055e-07	5.63444e-06	304	0.0535282	P10126	EF1A1_MOUSE	Elongation factor 1-alpha 1	Eef1a1	P10126	Mus musculus	translational elongation,aging,positive regulation of cell death,positive regulation of neuron projection development,cellular response to drug,protein homooligomerization,cellular response to epidermal growth factor stimulus,negative regulation of reactive oxygen species biosynthetic process,cellular response to nerve growth factor stimulus	tRNA binding,RNA binding,mRNA binding,translation elongation factor activity,GTPase activity,protein binding,GTP binding,drug binding,protein kinase binding	extracellular space,nucleus,nucleolus,cytoplasm,cytosol,plasma membrane,membrane,cortical actin cytoskeleton,ruffle membrane,myelin sheath,extracellular exosome	sp	1	3	uniprot_mouse_proteome	>sp|P10126|EF1A1_MOUSE Elongation factor 1-alpha 1 OS=Mus musculus GN=Eef1a1 PE=1 SV=3	25	61
TRUE	Old_Native / Young_Native	Old_Native	Young_Native	230	P23116	2148642	1.97137e+06	-0.124223	0.124223	-8.2502	0.917498	0	8.14123e-07	5.7014e-06	229	0.0369907	P23116	EIF3A_MOUSE	Eukaryotic translation initiation factor 3 subunit A	Eif3a	P23116	Mus musculus	formation of cytoplasmic translation initiation complex,translation reinitiation,negative regulation of ERK1 and ERK2 cascade,IRES-dependent viral translational initiation,viral translational termination-reinitiation	RNA binding,mRNA binding,protein binding,receptor tyrosine kinase binding,translation initiation factor activity	nucleus,nucleolus,microtubule organizing center,cytosol,eukaryotic translation initiation factor 3 complex,microtubule,membrane,multi-eIF complex,eukaryotic translation initiation factor 3 complex, eIF3e,eukaryotic translation initiation factor 3 complex, eIF3m	sp	1	5	uniprot_mouse_proteome	>sp|P23116|EIF3A_MOUSE Eukaryotic translation initiation factor 3 subunit A OS=Mus musculus GN=Eif3a PE=1 SV=5	41	46
TRUE	Old_Native / Young_Native	Old_Native	Young_Native	55	Q8C845	1.29714e+06	1.58463e+06	0.288812	0.288812	22.1634	1.22163	0	8.18258e-07	5.71256e-06	54	0.0505594	Q8C845	Q8C845_MOUSE	EF-hand domain-containing protein D2	Efhd2	Q8C845	Mus musculus				tr	1	1	uniprot_mouse_proteome	>tr|Q8C845|Q8C845_MOUSE EF-hand domain-containing protein D2 OS=Mus musculus GN=Efhd2 PE=1 SV=1	10	11
TRUE	Old_Native / Young_Native	Old_Native	Young_Native	120	P46735;Q7TQD7	801685	706931	-0.181466	0.181466	-11.8193	0.881807	0	8.3598e-07	5.81822e-06	119	0.0454037	P46735;Q7TQD7	MYO1B_MOUSE;Q7TQD7_MOUSE	Unconventional myosin-Ib;Myo1b protein	Myo1b	P46735;Q7TQD7	Mus musculus	post-Golgi vesicle-mediated transport,actin filament organization,actin filament-based movement,actin filament bundle assembly;	microfilament motor activity,calmodulin binding,ATP binding,phosphatidylinositol-4,5-bisphosphate binding,phosphatidylinositol-3,4,5-trisphosphate binding,cadherin binding,actin filament binding;	cytoplasm,early endosome,actin filament,plasma membrane,brush border,endosome membrane,myosin complex,filopodium,perinuclear region of cytoplasm,extracellular exosome,cell periphery,trans-Golgi network membrane;	sp;tr	1	3;1	uniprot_mouse_proteome	>sp|P46735|MYO1B_MOUSE Unconventional myosin-Ib OS=Mus musculus GN=Myo1b PE=1 SV=3;>tr|Q7TQD7|Q7TQD7_MOUSE Myo1b protein OS=Mus musculus GN=Myo1b PE=1 SV=1	22	24
TRUE	Old_Native / Young_Native	Old_Native	Young_Native	50	A0A0R4J187;P23475	228926	166095	-0.462872	0.462872	-27.4459	0.725541	0	8.89997e-07	6.17504e-06	49	0.0920677	A0A0R4J187;P23475	A0A0R4J187_MOUSE;XRCC6_MOUSE	X-ray repair cross-complementing protein 6	Xrcc6	A0A0R4J187;P23475	Mus musculus	;telomere maintenance,activation of innate immune response,double-strand break repair,double-strand break repair via nonhomologous end joining,transcription, DNA-templated,cellular response to DNA damage stimulus,response to ionizing radiation,DNA duplex unwinding,V(D)J recombination,positive regulation of protein kinase activity,negative regulation of transcription, DNA-templated,positive regula…	;damaged DNA binding,double-stranded DNA binding,RNA binding,ATP-dependent DNA helicase activity,protein binding,ATP binding,protein C-terminus binding,cyclin binding,telomeric DNA binding,transcription regulatory region DNA binding,macromolecular complex binding,5'-deoxyribose-5-phosphate lyase activity,double-stranded telomeric DNA binding	;nuclear chromosome, telomeric region,nucleus,nucleoplasm,transcription factor complex,nucleolus,cytoplasm,membrane,protein-DNA complex,protein complex,Ku70:Ku80 complex,nonhomologous end joining complex	tr;sp	1	1;5	uniprot_mouse_proteome	>tr|A0A0R4J187|A0A0R4J187_MOUSE X-ray repair cross-complementing protein 6 OS=Mus musculus GN=Xrcc6 PE=1 SV=1;>sp|P23475|XRCC6_MOUSE X-ray repair cross-complementing protein 6 OS=Mus musculus GN=Xrcc6 PE=1 SV=5	10	10
TRUE	Old_Native / Young_Native	Old_Native	Young_Native	35	P11440	315302	143508	-1.13561	1.13561	-54.4856	0.455144	0	9.07671e-07	6.27829e-06	34	0.195271	P11440	CDK1_MOUSE	Cyclin-dependent kinase 1	Cdk1	P11440	Mus musculus	regulation of transcription involved in G1/S transition of mitotic cell cycle,microtubule cytoskeleton organization,DNA repair,protein complex assembly,protein phosphorylation,apoptotic process,mitotic G2 DNA damage checkpoint,cell aging,cell proliferation,response to toxic substance,regulation of gene expression,positive regulation of gene expression,positive regulation of G2/M transition of mit…	chromatin binding,protein kinase activity,protein serine/threonine kinase activity,cyclin-dependent protein serine/threonine kinase activity,protein binding,ATP binding,RNA polymerase II carboxy-terminal domain kinase activity,kinase activity,cyclin binding,Hsp70 protein binding,histone kinase activity,cyclin-dependent protein kinase activity	cyclin-dependent protein kinase holoenzyme complex,nuclear chromosome, telomeric region,nucleus,nucleoplasm,centrosome,cytosol,spindle microtubule,membrane,midbody,extracellular exosome,mitotic spindle,cyclin B1-CDK1 complex,mitochondrial matrix	sp	1	3	uniprot_mouse_proteome	>sp|P11440|CDK1_MOUSE Cyclin-dependent kinase 1 OS=Mus musculus GN=Cdk1 PE=1 SV=3	7	7
TRUE	Old_Native / Young_Native	Old_Native	Young_Native	105	O08917	1.08158e+06	1.44514e+06	0.418065	0.418065	33.6135	1.33613	0	9.21244e-07	6.35263e-06	104	0.129303	O08917	FLOT1_MOUSE	Flotillin-1	Flot1	O08917	Mus musculus	membrane raft assembly,positive regulation of cytokine production,positive regulation of protein phosphorylation,regulation of receptor internalization,endocytosis,axonogenesis,axon guidance,extracellular matrix disassembly,positive regulation of protein binding,positive regulation of synaptic transmission, dopaminergic,positive regulation of interferon-beta production,dsRNA transport,positive re…	protease binding,protein binding,ionotropic glutamate receptor binding,protein heterodimerization activity	uropod,lysosomal membrane,endosome,early endosome,microtubule organizing center,plasma membrane,caveola,cell-cell junction,cell-cell adherens junction,focal adhesion,membrane,basolateral plasma membrane,flotillin complex,lamellipodium,cytoplasmic vesicle,centriolar satellite,sarcolemma,melanosome,cell-cell contact zone,plasma membrane raft,membrane raft,extracellular exosome,COP9 signalosome,cort…	sp	1	1	uniprot_mouse_proteome	>sp|O08917|FLOT1_MOUSE Flotillin-1 OS=Mus musculus GN=Flot1 PE=1 SV=1	19	21
TRUE	Old_Native / Young_Native	Old_Native	Young_Native	90	Q9JHU9	3.14256e+06	2.4374e+06	-0.366595	0.366595	-22.4389	0.775611	0	9.32823e-07	6.4128e-06	89	0.0674171	Q9JHU9	INO1_MOUSE	Inositol-3-phosphate synthase 1	Isyna1	Q9JHU9	Mus musculus	inositol biosynthetic process,phospholipid biosynthetic process	inositol-3-phosphate synthase activity	cytoplasm	sp	1	1	uniprot_mouse_proteome	>sp|Q9JHU9|INO1_MOUSE Inositol-3-phosphate synthase 1 OS=Mus musculus GN=Isyna1 PE=1 SV=1	14	18
TRUE	Old_Native / Young_Native	Old_Native	Young_Native	70	P42669	1.73508e+06	2.22e+06	0.355556	0.355556	27.9479	1.27948	0	9.49194e-07	6.50545e-06	69	0.05887	P42669	PURA_MOUSE	Transcriptional activator protein Pur-alpha	Pura	P42669	Mus musculus	DNA unwinding involved in DNA replication,transcription, DNA-templated,apoptotic process,mitotic cell cycle checkpoint,nervous system development,cell proliferation,positive regulation of cell proliferation,negative regulation of translation,cell differentiation,negative regulation of transcription, DNA-templated	translation repressor activity, nucleic acid binding,DNA binding,double-stranded DNA binding,double-stranded telomeric DNA binding,single-stranded DNA binding,transcription factor activity, sequence-specific DNA binding,RNA binding,protein binding,transcription factor binding,purine-rich negative regulatory element binding,SMAD binding	nucleus,DNA replication factor A complex,cytoplasm,dendrite,neuronal cell body	sp	1	1	uniprot_mouse_proteome	>sp|P42669|PURA_MOUSE Transcriptional activator protein Pur-alpha OS=Mus musculus GN=Pura PE=1 SV=1	9	14
TRUE	Old_Native / Young_Native	Old_Native	Young_Native	40	Q8CIG8	364896	261151	-0.482601	0.482601	-28.4314	0.715686	0	9.69536e-07	6.62467e-06	39	0.0751879	Q8CIG8	ANM5_MOUSE	Protein arginine N-methyltransferase 5	Prmt5	Q8CIG8	Mus musculus	negative regulation of transcription from RNA polymerase II promoter,spliceosomal snRNP assembly,DNA-templated transcription, termination,peptidyl-arginine methylation,peptidyl-arginine methylation, to symmetrical-dimethyl arginine,circadian regulation of gene expression,peptidyl-arginine N-methylation,endothelial cell activation,histone H4-R3 methylation,Golgi ribbon formation,positive regulatio…	core promoter sequence-specific DNA binding,chromatin binding,transcription corepressor activity,protein binding,methyltransferase activity,methyl-CpG binding,histone-arginine N-methyltransferase activity,protein-arginine N-methyltransferase activity,protein-arginine omega-N symmetric methyltransferase activity,ribonucleoprotein complex binding,histone methyltransferase activity (H4-R3 specific),…	nucleus,cytoplasm,Golgi apparatus,cytosol,methylosome,histone methyltransferase complex	sp	1	3	uniprot_mouse_proteome	>sp|Q8CIG8|ANM5_MOUSE Protein arginine N-methyltransferase 5 OS=Mus musculus GN=Prmt5 PE=1 SV=3	7	8
TRUE	Old_Native / Young_Native	Old_Native	Young_Native	155	Q9Z1Q9	1.20525e+06	1.1401e+06	-0.0801628	0.0801628	-5.40491	0.945951	0	9.88454e-07	6.73347e-06	154	0.0357689	Q9Z1Q9	SYVC_MOUSE	Valine--tRNA ligase	Vars	Q9Z1Q9	Mus musculus	valyl-tRNA aminoacylation,regulation of translational fidelity	aminoacyl-tRNA editing activity,valine-tRNA ligase activity,ATP binding	mitochondrion,cytosol	sp	1	1	uniprot_mouse_proteome	>sp|Q9Z1Q9|SYVC_MOUSE Valine--tRNA ligase OS=Mus musculus GN=Vars PE=1 SV=1	27	31
TRUE	Old_Native / Young_Native	Old_Native	Young_Native	100	Q5SWU9;Q5SWU9-2	466949	414743	-0.171049	0.171049	-11.1803	0.888197	0	1.01003e-06	6.85966e-06	99	0.0450795	Q5SWU9;Q5SWU9-2	ACACA_MOUSE	Acetyl-CoA carboxylase 1;Isoform 2 of Acetyl-CoA carboxylase 1	Acaca	Q5SWU9;Q5SWU9-2	Mus musculus	tissue homeostasis,acetyl-CoA metabolic process,lipid metabolic process,fatty acid biosynthetic process,multicellular organismal protein metabolic process,protein homotetramerization,lipid homeostasis,cellular response to prostaglandin E stimulus,malonyl-CoA biosynthetic process;	acetyl-CoA carboxylase activity,biotin carboxylase activity,protein binding,ATP binding,identical protein binding,metal ion binding;	fibrillar center,mitochondrion,cytosol,actin cytoskeleton,extracellular exosome;	sp	1;	1;	uniprot_mouse_proteome	>sp|Q5SWU9|ACACA_MOUSE Acetyl-CoA carboxylase 1 OS=Mus musculus GN=Acaca PE=1 SV=1;>sp|Q5SWU9-2|ACACA_MOUSE Isoform 2 of Acetyl-CoA carboxylase 1 OS=Mus musculus GN=Acaca	20	20
TRUE	Old_Native / Young_Native	Old_Native	Young_Native	375	Q01853	20465550	18814224	-0.121374	0.121374	-8.06881	0.919312	0	1.01807e-06	6.89341e-06	374	0.0362369	Q01853	TERA_MOUSE	Transitional endoplasmic reticulum ATPase	Vcp	Q01853	Mus musculus	double-strand break repair,ubiquitin-dependent protein catabolic process,NADH metabolic process,ER to Golgi vesicle-mediated transport,autophagy,activation of cysteine-type endopeptidase activity involved in apoptotic process,cellular response to DNA damage stimulus,proteasomal protein catabolic process,positive regulation of mitochondrial membrane potential,macroautophagy,protein ubiquitination,…	RNA binding,protein binding,ATP binding,lipid binding,ATPase activity,protein phosphatase binding,protein domain specific binding,polyubiquitin binding,ubiquitin protein ligase binding,deubiquitinase activator activity,K48-linked polyubiquitin binding,MHC class I protein binding,identical protein binding,ADP binding,ubiquitin-like protein ligase binding,BAT3 complex binding,ubiquitin-specific pro…	proteasome complex,nucleus,nucleoplasm,cytoplasm,endoplasmic reticulum,endoplasmic reticulum membrane,lipid particle,cytosol,VCP-NPL4-UFD1 AAA ATPase complex,site of double-strand break,Derlin-1 retrotranslocation complex,myelin sheath,protein complex,perinuclear region of cytoplasm,extracellular exosome,ATPase complex,VCP-NSFL1C complex	sp	1	4	uniprot_mouse_proteome	>sp|Q01853|TERA_MOUSE Transitional endoplasmic reticulum ATPase OS=Mus musculus GN=Vcp PE=1 SV=4	46	75
TRUE	Old_Native / Young_Native	Old_Native	Young_Native	440	Q80X90	2.07652e+06	2.48643e+06	0.259909	0.259909	19.7404	1.1974	0	1.04362e-06	7.02549e-06	439	0.0259694	Q80X90	FLNB_MOUSE	Filamin-B	Flnb	Q80X90	Mus musculus	keratinocyte development,epithelial cell morphogenesis,skeletal muscle tissue development,actin cytoskeleton organization	RNA binding,actin binding,protein binding,identical protein binding,cadherin binding	stress fiber,nucleus,cytoplasm,cytosol,plasma membrane,brush border,focal adhesion,cell cortex,Z disc,extracellular matrix,neuron projection,neuronal cell body,extracellular exosome	sp	1	3	uniprot_mouse_proteome	>sp|Q80X90|FLNB_MOUSE Filamin-B OS=Mus musculus GN=Flnb PE=1 SV=3	82	88
TRUE	Old_Native / Young_Native	Old_Native	Young_Native	100	P10761	18854880	14715281	-0.357623	0.357623	-21.9551	0.780449	0	1.04382e-06	7.02549e-06	99	0.130113	P10761	ZP3_MOUSE	Zona pellucida sperm-binding protein 3	Zp3	P10761	Mus musculus	positive regulation of type IV hypersensitivity,blastocyst formation,humoral immune response mediated by circulating immunoglobulin,positive regulation of leukocyte migration,positive regulation of humoral immune response,manganese ion transport,binding of sperm to zona pellucida,regulation of receptor activity,positive regulation of phosphatidylinositol biosynthetic process,positive regulation o…	signal transducer activity,manganese ion transmembrane transporter activity,protein binding,carbohydrate binding,acrosin binding,structural constituent of egg coat,identical protein binding,receptor agonist activity	proteinaceous extracellular matrix,extracellular space,cytoplasm,multivesicular body,endoplasmic reticulum,plasma membrane,integral component of membrane,extracellular matrix,outer acrosomal membrane,Golgi apparatus,secretory granule,perinuclear region of cytoplasm	sp	1	4	uniprot_mouse_proteome	>sp|P10761|ZP3_MOUSE Zona pellucida sperm-binding protein 3 OS=Mus musculus GN=Zp3 PE=1 SV=4	12	20
TRUE	Old_Native / Young_Native	Old_Native	Young_Native	15	Q9CRB1	55168.3	161815	1.55244	1.55244	193.312	2.93312	0	1.0931e-06	7.33519e-06	14	0.187149	Q9CRB1	Q9CRB1_MOUSE	Galectin	Lgals7	Q9CRB1	Mus musculus				tr	1	1	uniprot_mouse_proteome	>tr|Q9CRB1|Q9CRB1_MOUSE Galectin OS=Mus musculus GN=Lgals7 PE=1 SV=1	3	3
TRUE	Old_Native / Young_Native	Old_Native	Young_Native	35	P19001	83915.9	245481	1.54859	1.54859	192.532	2.92532	0	1.10924e-06	7.42134e-06	34	0.418361	P19001	K1C19_MOUSE	Keratin, type I cytoskeletal 19	Krt19	P19001	Mus musculus	Notch signaling pathway,response to estrogen,sarcomere organization,cell differentiation involved in embryonic placenta development	protein binding,structural constituent of muscle,protein complex binding	intermediate filament,plasma membrane,dystrophin-associated glycoprotein complex,apicolateral plasma membrane,Z disc,sarcolemma,costamere,extracellular exosome,cell periphery,terminal web	sp	1	1	uniprot_mouse_proteome	>sp|P19001|K1C19_MOUSE Keratin, type I cytoskeletal 19 OS=Mus musculus GN=Krt19 PE=1 SV=1	7	7
TRUE	Old_Native / Young_Native	Old_Native	Young_Native	55	Q64674	1.51113e+06	1.06458e+06	-0.505351	0.505351	-29.5511	0.704489	0	1.11982e-06	7.46991e-06	54	0.116959	Q64674	SPEE_MOUSE	Spermidine synthase	Srm	Q64674	Mus musculus	spermidine biosynthetic process,cellular response to leukemia inhibitory factor	spermidine synthase activity,identical protein binding,protein homodimerization activity		sp	1	1	uniprot_mouse_proteome	>sp|Q64674|SPEE_MOUSE Spermidine synthase OS=Mus musculus GN=Srm PE=1 SV=1	10	11
TRUE	Old_Native / Young_Native	Old_Native	Young_Native	45	Q80Y81;Q80Y81-2	255180	214961	-0.247437	0.247437	-15.7608	0.842392	0	1.19237e-06	7.9303e-06	44	0.05757	Q80Y81;Q80Y81-2	RNZ2_MOUSE	Zinc phosphodiesterase ELAC protein 2;Isoform 2 of Zinc phosphodiesterase ELAC protein 2	Elac2	Q80Y81;Q80Y81-2	Mus musculus	mitochondrial tRNA 3'-trailer cleavage, endonucleolytic;	RNA binding,tRNA-specific ribonuclease activity,3'-tRNA processing endoribonuclease activity,metal ion binding;	nucleus,nucleoplasm,mitochondrion,mitochondrial nucleoid;	sp	1;	1;	uniprot_mouse_proteome	>sp|Q80Y81|RNZ2_MOUSE Zinc phosphodiesterase ELAC protein 2 OS=Mus musculus GN=Elac2 PE=1 SV=1;>sp|Q80Y81-2|RNZ2_MOUSE Isoform 2 of Zinc phosphodiesterase ELAC protein 2 OS=Mus musculus GN=Elac2	9	9
TRUE	Old_Native / Young_Native	Old_Native	Young_Native	80	P08226	1.85225e+06	2667960	0.526459	0.526459	44.039	1.44039	0	1.23927e-06	8.21794e-06	79	0.0941728	P08226	APOE_MOUSE	Apolipoprotein E	Apoe	P08226	Mus musculus	retinoid metabolic process,negative regulation of endothelial cell proliferation,response to dietary excess,lipid metabolic process,triglyceride metabolic process,cholesterol biosynthetic process,cholesterol catabolic process,cellular calcium ion homeostasis,receptor-mediated endocytosis,response to oxidative stress,G-protein coupled receptor signaling pathway,nitric oxide mediated signal transdu…	beta-amyloid binding,lipid transporter activity,protein binding,phospholipid binding,heparin binding,lipid binding,cholesterol binding,antioxidant activity,cholesterol transporter activity,identical protein binding,protein homodimerization activity,metal chelating activity,protein dimerization activity,tau protein binding,low-density lipoprotein particle receptor binding,phosphatidylcholine-stero…	extracellular region,extracellular space,nucleus,endoplasmic reticulum,Golgi apparatus,cytosol,plasma membrane,membrane,extracellular matrix,very-low-density lipoprotein particle,low-density lipoprotein particle,intermediate-density lipoprotein particle,high-density lipoprotein particle,chylomicron,extracellular exosome,blood microparticle,extracellular vesicle,lipoprotein particle,Requires Ontol…	sp	1	2	uniprot_mouse_proteome	>sp|P08226|APOE_MOUSE Apolipoprotein E OS=Mus musculus GN=Apoe PE=1 SV=2	12	16
TRUE	Old_Native / Young_Native	Old_Native	Young_Native	75	Q9Z0K8	5065636	3.71035e+06	-0.44919	0.44919	-26.7546	0.732454	0	1.30849e-06	8.65143e-06	74	0.105335	Q9Z0K8	VNN1_MOUSE	Pantetheinase	Vnn1	Q9Z0K8	Mus musculus	acute inflammatory response,chronic inflammatory response,inflammatory response,pantothenate metabolic process,positive regulation of T cell differentiation in thymus,innate immune response,cell-cell adhesion,negative regulation of oxidative stress-induced intrinsic apoptotic signaling pathway	pantetheine hydrolase activity,GPI anchor binding	plasma membrane,integral component of membrane,anchored component of membrane,extracellular exosome,extracellular space	sp	1	3	uniprot_mouse_proteome	>sp|Q9Z0K8|VNN1_MOUSE Pantetheinase OS=Mus musculus GN=Vnn1 PE=1 SV=3	12	15
TRUE	Old_Native / Young_Native	Old_Native	Young_Native	95	Q8BJD1	754533	1.07158e+06	0.506089	0.506089	42.0195	1.42019	0	1.31712e-06	8.68298e-06	94	0.0878232	Q8BJD1	ITIH5_MOUSE	Inter-alpha-trypsin inhibitor heavy chain H5	Itih5	Q8BJD1	Mus musculus	biological_process,negative regulation of endopeptidase activity,hyaluronan metabolic process	molecular_function,serine-type endopeptidase inhibitor activity	cellular_component,extracellular region	sp	1	1	uniprot_mouse_proteome	>sp|Q8BJD1|ITIH5_MOUSE Inter-alpha-trypsin inhibitor heavy chain H5 OS=Mus musculus GN=Itih5 PE=1 SV=1	17	19
TRUE	Old_Native / Young_Native	Old_Native	Young_Native	110	Q8QZY1	1.53559e+06	1379109	-0.155061	0.155061	-10.1905	0.898095	0	1.33109e-06	8.69851e-06	109	0.0361059	Q8QZY1	EIF3L_MOUSE	Eukaryotic translation initiation factor 3 subunit L	Eif3l	Q8QZY1	Mus musculus	translational initiation,viral translational termination-reinitiation	RNA binding,translation initiation factor activity	fibrillar center,nucleoplasm,nucleolus,eukaryotic translation initiation factor 3 complex,membrane	sp	1	1	uniprot_mouse_proteome	>sp|Q8QZY1|EIF3L_MOUSE Eukaryotic translation initiation factor 3 subunit L OS=Mus musculus GN=Eif3l PE=1 SV=1	21	22
TRUE	Old_Native / Young_Native	Old_Native	Young_Native	100	Q04750	1.62849e+06	1.47051e+06	-0.147214	0.147214	-9.70074	0.902993	0	1.32791e-06	8.69851e-06	99	0.0579524	Q04750	TOP1_MOUSE	DNA topoisomerase 1	Top1	Q04750	Mus musculus	DNA replication,DNA topological change,chromatin remodeling,chromosome segregation,peptidyl-serine phosphorylation,circadian regulation of gene expression,embryonic cleavage,response to drug	core promoter sequence-specific DNA binding,DNA binding,chromatin binding,double-stranded DNA binding,single-stranded DNA binding,RNA binding,DNA topoisomerase type I activity,protein serine/threonine kinase activity,ATP binding,protein domain specific binding,supercoiled DNA binding	cytoplasmic mRNA processing body,fibrillar center,nucleus,nucleoplasm,nucleolus,cytoplasm,DNA topoisomerase complex (ATP-hydrolyzing),replication fork protection complex,protein-DNA complex,perikaryon,nuclear chromosome	sp	1	2	uniprot_mouse_proteome	>sp|Q04750|TOP1_MOUSE DNA topoisomerase 1 OS=Mus musculus GN=Top1 PE=1 SV=2	17	20
TRUE	Old_Native / Young_Native	Old_Native	Young_Native	90	E9PXX7;Q91W90	3.37542e+06	2969164	-0.185009	0.185009	-12.0356	0.879644	0	1.32428e-06	8.69851e-06	89	0.0355867	E9PXX7;Q91W90	E9PXX7_MOUSE;TXND5_MOUSE	Thioredoxin domain-containing protein 5	Txndc5	E9PXX7;Q91W90	Mus musculus	;protein folding,response to endoplasmic reticulum stress,apoptotic cell clearance,cell redox homeostasis	;protein disulfide isomerase activity	;endoplasmic reticulum lumen,extracellular exosome	tr;sp	1	1;2	uniprot_mouse_proteome	>tr|E9PXX7|E9PXX7_MOUSE Thioredoxin domain-containing protein 5 OS=Mus musculus GN=Txndc5 PE=1 SV=1;>sp|Q91W90|TXND5_MOUSE Thioredoxin domain-containing protein 5 OS=Mus musculus GN=Txndc5 PE=1 SV=2	13	18
TRUE	Old_Native / Young_Native	Old_Native	Young_Native	50	A0A1D5RM85;P62717	4.7779e+06	4328746	-0.142429	0.142429	-9.40074	0.905993	0	1.34411e-06	8.7484e-06	49	0.0288966	A0A1D5RM85;P62717	A0A1D5RM85_MOUSE;RL18A_MOUSE	60S ribosomal protein L18a (Fragment);60S ribosomal protein L18a	Rpl18a	A0A1D5RM85;P62717	Mus musculus	;translation,response to antineoplastic agent	;RNA binding,structural constituent of ribosome	;membrane,cytosolic large ribosomal subunit	tr;sp	4;1	1	uniprot_mouse_proteome	>tr|A0A1D5RM85|A0A1D5RM85_MOUSE 60S ribosomal protein L18a (Fragment) OS=Mus musculus GN=Rpl18a PE=4 SV=1;>sp|P62717|RL18A_MOUSE 60S ribosomal protein L18a OS=Mus musculus GN=Rpl18a PE=1 SV=1	8	10
TRUE	Old_Native / Young_Native	Old_Native	Young_Native	30	P04117	73286.1	622091	3.08551	3.08551	748.852	8.48852	0	1.34651e-06	8.7484e-06	29	0.82392	P04117	FABP4_MOUSE	Fatty acid-binding protein, adipocyte	Fabp4	P04117	Mus musculus	cytokine production,negative regulation of protein kinase activity,transport,cholesterol homeostasis,negative regulation of transcription, DNA-templated,positive regulation of inflammatory response,white fat cell differentiation,brown fat cell differentiation,cellular response to lithium ion,cellular response to tumor necrosis factor	transporter activity,fatty acid binding	nucleoplasm,cytoplasm,extracellular exosome	sp	1	3	uniprot_mouse_proteome	>sp|P04117|FABP4_MOUSE Fatty acid-binding protein, adipocyte OS=Mus musculus GN=Fabp4 PE=1 SV=3	6	6
TRUE	Old_Native / Young_Native	Old_Native	Young_Native	20	Q99KG5;Q99KG5-2;Q99KG5-3	50113.2	96807.9	0.949936	0.949936	93.1787	1.93179	0	1.37269e-06	8.89282e-06	19	0.152561	Q99KG5;Q99KG5-2;Q99KG5-3	LSR_MOUSE	Lipolysis-stimulated lipoprotein receptor;Isoform 2 of Lipolysis-stimulated lipoprotein receptor;Isoform 3 of Lipolysis-stimulated lipoprotein receptor	Lsr	Q99KG5;Q99KG5-2;Q99KG5-3	Mus musculus	liver development,receptor-mediated endocytosis,regulation of lipid metabolic process,low-density lipoprotein particle clearance,very-low-density lipoprotein particle clearance,lipoprotein transport,establishment of blood-brain barrier,Requires Ontology,tricellular tight junction assembly;;	protein binding,low-density lipoprotein particle binding,lipoprotein particle receptor activity;;	plasma membrane,integral component of membrane,very-low-density lipoprotein particle,low-density lipoprotein particle,chylomicron,tricellular tight junction,extracellular exosome;;	sp	1;;	1;;	uniprot_mouse_proteome	>sp|Q99KG5|LSR_MOUSE Lipolysis-stimulated lipoprotein receptor OS=Mus musculus GN=Lsr PE=1 SV=1;>sp|Q99KG5-2|LSR_MOUSE Isoform 2 of Lipolysis-stimulated lipoprotein receptor OS=Mus musculus GN=Lsr;>sp|Q99KG5-3|LSR_MOUSE Isoform 3 of Lipolysis-stimulated lipoprotein receptor OS=Mus musculus GN=Lsr	4	4
TRUE	Old_Native / Young_Native	Old_Native	Young_Native	35	P29416	565503	704742	0.31756	0.31756	24.6221	1.24622	0	1.61283e-06	1.04185e-05	34	0.0612149	P29416	HEXA_MOUSE	Beta-hexosaminidase subunit alpha	Hexa	P29416	Mus musculus	skeletal system development,carbohydrate metabolic process,glycosaminoglycan biosynthetic process,ganglioside catabolic process,lysosome organization,sensory perception of sound,locomotory behavior,adult walking behavior,lipid storage,sexual reproduction,glycosaminoglycan metabolic process,myelination,cell morphogenesis involved in neuron differentiation,neuromuscular process controlling posture,…	beta-N-acetylhexosaminidase activity,acetylglucosaminyltransferase activity,protein heterodimerization activity,Requires Ontology	lysosome,membrane,azurophil granule,extracellular exosome	sp	1	2	uniprot_mouse_proteome	>sp|P29416|HEXA_MOUSE Beta-hexosaminidase subunit alpha OS=Mus musculus GN=Hexa PE=1 SV=2	7	7
TRUE	Old_Native / Young_Native	Old_Native	Young_Native	35	O88792	507584	698107	0.459802	0.459802	37.5353	1.37535	0	1.76221e-06	1.13509e-05	34	0.0864395	O88792	JAM1_MOUSE	Junctional adhesion molecule A	F11r	O88792	Mus musculus	regulation of cytokine production,cell adhesion,response to radiation,epithelial cell differentiation,actomyosin structure organization,negative regulation of GTPase activity,positive regulation of GTPase activity,positive regulation of blood pressure,intestinal absorption,protein localization to plasma membrane,establishment of endothelial intestinal barrier,regulation of membrane permeability,r…	PDZ domain binding,cadherin binding	plasma membrane,bicellular tight junction,integral component of membrane,cytoplasmic vesicle,slit diaphragm,extracellular exosome	sp	1	2	uniprot_mouse_proteome	>sp|O88792|JAM1_MOUSE Junctional adhesion molecule A OS=Mus musculus GN=F11r PE=1 SV=2	7	7
TRUE	Old_Native / Young_Native	Old_Native	Young_Native	610	O08638	7632158	7.70833e+06	0.014328	0.014328	0.998086	1.00998	0	1.77488e-06	1.13998e-05	609	0.0399483	O08638	MYH11_MOUSE	Myosin-11	Myh11	O08638	Mus musculus	smooth muscle contraction,skeletal muscle myosin thick filament assembly,elastic fiber assembly,cardiac muscle fiber development	motor activity,calmodulin binding,ATP binding,structural constituent of muscle,actin filament binding	stress fiber,muscle myosin complex,brush border,myosin complex,myofibril,smooth muscle contractile fiber,myosin filament,melanosome,extracellular exosome	sp	1	1	uniprot_mouse_proteome	>sp|O08638|MYH11_MOUSE Myosin-11 OS=Mus musculus GN=Myh11 PE=1 SV=1	82	122
TRUE	Old_Native / Young_Native	Old_Native	Young_Native	20	Q99L20	83194.4	122476	0.55794	0.55794	47.2166	1.47217	0	1.79024e-06	1.14657e-05	19	0.0862852	Q99L20	GSTT3_MOUSE	Glutathione S-transferase theta-3	Gstt3	Q99L20	Mus musculus	glutathione metabolic process	glutathione transferase activity	cytoplasm	sp	1	1	uniprot_mouse_proteome	>sp|Q99L20|GSTT3_MOUSE Glutathione S-transferase theta-3 OS=Mus musculus GN=Gstt3 PE=1 SV=1	4	4
TRUE	Old_Native / Young_Native	Old_Native	Young_Native	160	Q3UW53	1.22705e+06	1.77544e+06	0.532975	0.532975	44.691	1.44691	0	1.84681e-06	1.17549e-05	159	0.193138	Q3UW53	NIBAN_MOUSE	Protein Niban	Fam129a	Q3UW53	Mus musculus	negative regulation of protein phosphorylation,positive regulation of protein phosphorylation,response to endoplasmic reticulum stress,positive regulation of translation	molecular_function	cytoplasm,cytosol,plasma membrane,membrane,extracellular exosome	sp	1	2	uniprot_mouse_proteome	>sp|Q3UW53|NIBAN_MOUSE Protein Niban OS=Mus musculus GN=Fam129a PE=1 SV=2	27	32
TRUE	Old_Native / Young_Native	Old_Native	Young_Native	45	Q91VH2	662790	880365	0.409549	0.409549	32.8271	1.32827	0	1.84394e-06	1.17549e-05	44	0.0675944	Q91VH2	SNX9_MOUSE	Sorting nexin-9	Snx9	Q91VH2	Mus musculus	mitotic cytokinesis,intracellular protein transport,endocytosis,receptor-mediated endocytosis,endosomal transport,positive regulation of protein oligomerization,cleavage furrow formation,positive regulation of GTPase activity,positive regulation of protein kinase activity,positive regulation of membrane protein ectodomain proteolysis,lipid tube assembly,membrane tubulation	protein binding,1-phosphatidylinositol binding,ubiquitin protein ligase binding,phosphatidylinositol binding,protein homodimerization activity,cadherin binding,Arp2/3 complex binding	ruffle,cytoplasm,trans-Golgi network,cytosol,plasma membrane,cytoplasmic vesicle membrane,extrinsic component of cytoplasmic side of plasma membrane,cytoplasmic vesicle,extracellular exosome,clathrin-coated vesicle	sp	1	1	uniprot_mouse_proteome	>sp|Q91VH2|SNX9_MOUSE Sorting nexin-9 OS=Mus musculus GN=Snx9 PE=1 SV=1	9	9
TRUE	Old_Native / Young_Native	Old_Native	Young_Native	60	P63276	3.65771e+06	2872633	-0.348566	0.348566	-21.4636	0.785364	0	1.85631e-06	1.17549e-05	59	0.0724678	P63276	RS17_MOUSE	40S ribosomal protein S17	Rps17	P63276	Mus musculus	ribosomal small subunit assembly,rRNA processing,translation,erythrocyte homeostasis,ribosomal small subunit biogenesis	RNA binding,structural constituent of ribosome	focal adhesion,membrane,cytosolic small ribosomal subunit,extracellular matrix,extracellular exosome	sp	1	2	uniprot_mouse_proteome	>sp|P63276|RS17_MOUSE 40S ribosomal protein S17 OS=Mus musculus GN=Rps17 PE=1 SV=2	7	12
TRUE	Old_Native / Young_Native	Old_Native	Young_Native	30	Q8N7N5	324188	266468	-0.282868	0.282868	-17.8045	0.821955	0	1.85181e-06	1.17549e-05	29	0.0457508	Q8N7N5	DCAF8_MOUSE	DDB1- and CUL4-associated factor 8	Dcaf8	Q8N7N5	Mus musculus	biological_process,protein ubiquitination	molecular_function	nucleus,nucleoplasm,cytoplasm,mitochondrion,cytosol,Cul4-RING E3 ubiquitin ligase complex	sp	1	1	uniprot_mouse_proteome	>sp|Q8N7N5|DCAF8_MOUSE DDB1- and CUL4-associated factor 8 OS=Mus musculus GN=Dcaf8 PE=1 SV=1	6	6
TRUE	Old_Native / Young_Native	Old_Native	Young_Native	45	A0A0R4J1N9;P40630;P40630-2	956737	1130247	0.240444	0.240444	18.1356	1.18136	0	1.86771e-06	1.17939e-05	44	0.04877	A0A0R4J1N9;P40630;P40630-2	A0A0R4J1N9_MOUSE;TFAM_MOUSE;TFAM_MOUSE	Transcription factor A, mitochondrial;Transcription factor A, mitochondrial;Isoform Nuclear of Transcription factor A, mitochondrial	Tfam	A0A0R4J1N9;P40630;P40630-2	Mus musculus	;transcription from mitochondrial promoter,transcription initiation from mitochondrial promoter,mitochondrial respiratory chain complex assembly,positive regulation of transcription, DNA-templated,positive regulation of transcription from RNA polymerase II promoter;	;RNA polymerase II core promoter proximal region sequence-specific DNA binding,transcription coactivator binding,chromatin binding,transcription factor activity, sequence-specific DNA binding,RNA binding,DNA binding, bending,heat shock protein binding,mitochondrial light strand promoter sense binding;	;nucleus,transcription factor complex,mitochondrion,mitochondrial nucleoid;	tr;sp;sp	1;1;	1;2;	uniprot_mouse_proteome	>tr|A0A0R4J1N9|A0A0R4J1N9_MOUSE Transcription factor A, mitochondrial OS=Mus musculus GN=Tfam PE=1 SV=1;>sp|P40630|TFAM_MOUSE Transcription factor A, mitochondrial OS=Mus musculus GN=Tfam PE=1 SV=2;>sp|P40630-2|TFAM_MOUSE Isoform Nuclear of Transcription factor A, mitochondrial OS=Mus musculus GN=Tfam	9	9
TRUE	Old_Native / Young_Native	Old_Native	Young_Native	45	P16110;Q8C253	1.88031e+06	2.52111e+06	0.423088	0.423088	34.0795	1.34079	0	1.8911e-06	1.19081e-05	44	0.0842464	P16110;Q8C253	LEG3_MOUSE;Q8C253_MOUSE	Galectin-3;Galectin	Lgals3	P16110;Q8C253	Mus musculus	skeletal system development,monocyte chemotaxis,mRNA processing,receptor-mediated endocytosis,RNA splicing,cell differentiation,extracellular matrix organization,neutrophil chemotaxis,regulation of T cell proliferation,innate immune response,negative regulation of endocytosis,eosinophil chemotaxis,macrophage chemotaxis,negative regulation of T cell receptor signaling pathway,positive chemotaxis,r…	RNA binding,protein binding,IgE binding,carbohydrate binding,chemoattractant activity,laminin binding;	immunological synapse,extracellular region,proteinaceous extracellular matrix,extracellular space,nucleus,spliceosomal complex,cytoplasm,mitochondrial inner membrane,external side of plasma membrane,cell surface,membrane,extracellular matrix,extracellular exosome,glial cell projection;	sp;tr	1	3;1	uniprot_mouse_proteome	>sp|P16110|LEG3_MOUSE Galectin-3 OS=Mus musculus GN=Lgals3 PE=1 SV=3;>tr|Q8C253|Q8C253_MOUSE Galectin OS=Mus musculus GN=Lgals3 PE=1 SV=1	6	9
TRUE	Old_Native / Young_Native	Old_Native	Young_Native	105	Q8BSE0	3.78347e+06	5.26601e+06	0.476999	0.476999	39.1845	1.39185	0	2.05471e-06	1.29022e-05	104	0.105157	Q8BSE0	RMD2_MOUSE	Regulator of microtubule dynamics protein 2	Rmdn2	Q8BSE0	Mus musculus	biological_process	molecular_function	spindle pole,mitochondrion,cytosol,microtubule,integral component of membrane	sp	1	1	uniprot_mouse_proteome	>sp|Q8BSE0|RMD2_MOUSE Regulator of microtubule dynamics protein 2 OS=Mus musculus GN=Rmdn2 PE=1 SV=1	15	21
TRUE	Old_Native / Young_Native	Old_Native	Young_Native	20	Q9CRY7	229598	146334	-0.649846	0.649846	-36.2652	0.637348	0	2.29333e-06	1.43605e-05	19	0.0898332	Q9CRY7	GDPD1_MOUSE	Glycerophosphodiester phosphodiesterase domain-containing protein 1	Gdpd1	Q9CRY7	Mus musculus	phospholipid metabolic process,glycerophospholipid catabolic process,N-acylethanolamine metabolic process	lysophospholipase activity,phosphoric diester hydrolase activity,metal ion binding,alkylglycerophosphoethanolamine phosphodiesterase activity	endoplasmic reticulum membrane,membrane,integral component of membrane,perinuclear region of cytoplasm	sp	1	1	uniprot_mouse_proteome	>sp|Q9CRY7|GDPD1_MOUSE Glycerophosphodiester phosphodiesterase domain-containing protein 1 OS=Mus musculus GN=Gdpd1 PE=1 SV=1	4	4
TRUE	Old_Native / Young_Native	Old_Native	Young_Native	105	Q99MN1	1.26161e+06	1.13755e+06	-0.149327	0.149327	-9.83291	0.901671	0	2.32111e-06	1.44941e-05	104	0.0351569	Q99MN1	SYK_MOUSE	Lysine--tRNA ligase	Kars	Q99MN1	Mus musculus	activation of MAPK activity,basophil activation involved in immune response,positive regulation of cytokine secretion involved in immune response,lysyl-tRNA aminoacylation,negative regulation of cell proliferation,positive regulation of macrophage chemotaxis,diadenosine tetraphosphate biosynthetic process,tumor necrosis factor-mediated signaling pathway,positive regulation of macrophage activatio…	nucleic acid binding,ATP adenylyltransferase activity,lysine-tRNA ligase activity,ATP binding,protein homodimerization activity,scaffold protein binding	extracellular space,nucleus,mitochondrion,cytosol,plasma membrane,aminoacyl-tRNA synthetase multienzyme complex	sp	1	1	uniprot_mouse_proteome	>sp|Q99MN1|SYK_MOUSE Lysine--tRNA ligase OS=Mus musculus GN=Kars PE=1 SV=1	18	21
TRUE	Old_Native / Young_Native	Old_Native	Young_Native	230	Q8VEK3	22056666	20334572	-0.11728	0.11728	-7.80759	0.921924	0	2.439e-06	1.5188e-05	229	0.0405443	Q8VEK3	HNRPU_MOUSE	Heterogeneous nuclear ribonucleoprotein U	Hnrnpu	Q8VEK3	Mus musculus	negative regulation of transcription from RNA polymerase II promoter,regulation of alternative mRNA splicing, via spliceosome,osteoblast differentiation,mRNA processing,regulation of mitotic cell cycle,RNA splicing,dosage compensation by inactivation of X chromosome,negative regulation of telomere maintenance via telomerase,circadian regulation of gene expression,negative regulation of kinase act…	RNA polymerase II core binding,core promoter binding,TFIIH-class transcription factor binding,DNA binding,chromatin binding,double-stranded DNA binding,single-stranded DNA binding,transcription corepressor activity,RNA binding,double-stranded RNA binding,single-stranded RNA binding,mRNA 3'-UTR binding,actin binding,protein binding,ATP binding,poly(A) binding,snRNA binding,poly(C) RNA binding,chro…	nuclear chromosome,kinetochore,nucleus,nucleoplasm,centrosome,cell surface,membrane,nuclear matrix,nuclear speck,midbody,intracellular ribonucleoprotein complex,extracellular matrix,macromolecular complex,cytoplasmic ribonucleoprotein granule,CRD-mediated mRNA stability complex,catalytic step 2 spliceosome,mitotic spindle,inactive sex chromosome,mitotic spindle midzone,mitotic spindle microtubule…	sp	1	1	uniprot_mouse_proteome	>sp|Q8VEK3|HNRPU_MOUSE Heterogeneous nuclear ribonucleoprotein U OS=Mus musculus GN=Hnrnpu PE=1 SV=1	29	46
TRUE	Old_Native / Young_Native	Old_Native	Young_Native	45	B1AT92;Q60631	604056	668830	0.146956	0.146956	10.7231	1.10723	0	2.4502e-06	1.52156e-05	44	0.0328014	B1AT92;Q60631	B1AT92_MOUSE;GRB2_MOUSE	Growth factor receptor-bound protein 2	Grb2	B1AT92;Q60631	Mus musculus	;Ras protein signal transduction,aging,insulin receptor signaling pathway,positive regulation of signal transduction,cell migration,cell differentiation,positive regulation of actin filament polymerization,receptor internalization,peptidyl-tyrosine autophosphorylation,Fc-epsilon receptor signaling pathway,regulation of cell proliferation,signal transduction in response to DNA damage,regulation of…	;phosphotyrosine binding,RNA binding,non-membrane spanning protein tyrosine kinase activity,SH3/SH2 adaptor activity,epidermal growth factor receptor binding,neurotrophin TRKA receptor binding,protein binding,SH3 domain binding,protein kinase binding,protein phosphatase binding,protein domain specific binding,identical protein binding,insulin receptor substrate binding,ephrin receptor binding	;nucleus,nucleoplasm,nucleolus,cytoplasm,endosome,Golgi apparatus,cytosol,plasma membrane,cell-cell junction,COP9 signalosome,vesicle membrane,membrane,extrinsic component of cytoplasmic side of plasma membrane,extracellular exosome,Grb2-EGFR complex	tr;sp	1	1	uniprot_mouse_proteome	>tr|B1AT92|B1AT92_MOUSE Growth factor receptor-bound protein 2 OS=Mus musculus GN=Grb2 PE=1 SV=1;>sp|Q60631|GRB2_MOUSE Growth factor receptor-bound protein 2 OS=Mus musculus GN=Grb2 PE=1 SV=1	9	9
TRUE	Old_Native / Young_Native	Old_Native	Young_Native	375	P34914	37271384	52765796	0.501535	0.501535	41.5719	1.41572	0	2.47162e-06	1.53063e-05	374	0.108049	P34914	HYES_MOUSE	Bifunctional epoxide hydrolase 2	Ephx2	P34914	Mus musculus	response to toxic substance,positive regulation of gene expression,dephosphorylation,cholesterol homeostasis,stilbene catabolic process,phospholipid dephosphorylation,regulation of cholesterol metabolic process,epoxide metabolic process	magnesium ion binding,epoxide hydrolase activity,receptor binding,toxic substance binding,phosphatase activity,10-hydroxy-9-(phosphonooxy)octadecanoate phosphatase activity,lipid phosphatase activity,protein homodimerization activity	peroxisome,cytosol,extracellular exosome	sp	1	2	uniprot_mouse_proteome	>sp|P34914|HYES_MOUSE Bifunctional epoxide hydrolase 2 OS=Mus musculus GN=Ephx2 PE=1 SV=2	30	75
TRUE	Old_Native / Young_Native	Old_Native	Young_Native	100	Q91XH5	2372001	2.69833e+06	0.185964	0.185964	13.7577	1.13758	0	2.50133e-06	1.54478e-05	99	0.0272932	Q91XH5	Q91XH5_MOUSE	Sepiapterin reductase	Spr	Q91XH5	Mus musculus				tr	1	1	uniprot_mouse_proteome	>tr|Q91XH5|Q91XH5_MOUSE Sepiapterin reductase OS=Mus musculus GN=Spr PE=1 SV=1	16	20
TRUE	Old_Native / Young_Native	Old_Native	Young_Native	30	Q9D1P4	332933	275304	-0.27421	0.27421	-17.3097	0.826903	0	2.5226e-06	1.55365e-05	29	0.0458102	Q9D1P4	CHRD1_MOUSE	Cysteine and histidine-rich domain-containing protein 1	Chordc1	Q9D1P4	Mus musculus	regulation of centrosome duplication,chaperone-mediated protein folding,regulation of cellular response to heat,negative regulation of Rho-dependent protein serine/threonine kinase activity	protein binding,ATP binding,zinc ion binding,ADP binding,Hsp90 protein binding,calcium ion binding		sp	1	1	uniprot_mouse_proteome	>sp|Q9D1P4|CHRD1_MOUSE Cysteine and histidine-rich domain-containing protein 1 OS=Mus musculus GN=Chordc1 PE=1 SV=1	5	6
TRUE	Old_Native / Young_Native	Old_Native	Young_Native	15	Q9QXC1	160112	236603	0.563381	0.563381	47.7728	1.47773	0	2.55884e-06	1.57166e-05	14	0.0729931	Q9QXC1	FETUB_MOUSE	Fetuin-B	Fetub	Q9QXC1	Mus musculus	single fertilization,binding of sperm to zona pellucida,negative regulation of endopeptidase activity	cysteine-type endopeptidase inhibitor activity,metalloendopeptidase inhibitor activity	extracellular region,extracellular exosome	sp	1	1	uniprot_mouse_proteome	>sp|Q9QXC1|FETUB_MOUSE Fetuin-B OS=Mus musculus GN=Fetub PE=1 SV=1	3	3
TRUE	Old_Native / Young_Native	Old_Native	Young_Native	265	Q3U2G2	5.5644e+06	4.90255e+06	-0.182694	0.182694	-11.8944	0.881056	0	2.62127e-06	1.60561e-05	264	0.0568187	Q3U2G2	Q3U2G2_MOUSE	Heat shock 70 kDa protein 4	Hspa4	Q3U2G2	Mus musculus				tr	1	1	uniprot_mouse_proteome	>tr|Q3U2G2|Q3U2G2_MOUSE Heat shock 70 kDa protein 4 OS=Mus musculus GN=Hspa4 PE=1 SV=1	34	53
TRUE	Old_Native / Young_Native	Old_Native	Young_Native	60	P55772	697847	935591	0.422966	0.422966	34.0681	1.34068	0	2.66366e-06	1.62715e-05	59	0.0800506	P55772	ENTP1_MOUSE	Ectonucleoside triphosphate diphosphohydrolase 1	Entpd1	P55772	Mus musculus	G-protein coupled receptor signaling pathway,purine ribonucleoside diphosphate catabolic process,platelet activation	ATP binding,nucleoside-diphosphatase activity,nucleoside-triphosphatase activity,Requires Ontology	basal lamina,membrane,integral component of membrane,extracellular exosome	sp	1	1	uniprot_mouse_proteome	>sp|P55772|ENTP1_MOUSE Ectonucleoside triphosphate diphosphohydrolase 1 OS=Mus musculus GN=Entpd1 PE=1 SV=1	10	12
TRUE	Old_Native / Young_Native	Old_Native	Young_Native	75	Q9CSH3	445722	383976	-0.21513	0.21513	-13.8531	0.861469	0	2.69718e-06	1.64316e-05	74	0.0718703	Q9CSH3	RRP44_MOUSE	Exosome complex exonuclease RRP44	Dis3	Q9CSH3	Mus musculus	rRNA processing,RNA catabolic process,rRNA catabolic process,positive regulation of GTPase activity,CUT catabolic process,RNA phosphodiester bond hydrolysis, exonucleolytic	3'-5'-exoribonuclease activity,RNA binding,endonuclease activity,guanyl-nucleotide exchange factor activity	nuclear exosome (RNase complex),exosome (RNase complex),nucleus,nucleoplasm,nucleolus,cytosol,membrane	sp	1	4	uniprot_mouse_proteome	>sp|Q9CSH3|RRP44_MOUSE Exosome complex exonuclease RRP44 OS=Mus musculus GN=Dis3 PE=1 SV=4	15	15
TRUE	Old_Native / Young_Native	Old_Native	Young_Native	40	Q61646	33959.2	209144	2.62262	2.62262	515.869	6.15869	0	2.80167e-06	1.7022e-05	39	0.462444	Q61646	HPT_MOUSE	Haptoglobin	Hp	Q61646	Mus musculus	immune system process,acute-phase response,Notch signaling pathway,positive regulation of cell death,response to hydrogen peroxide,defense response to bacterium,negative regulation of oxidoreductase activity,cellular oxidant detoxification,negative regulation of hydrogen peroxide catabolic process	antioxidant activity,hemoglobin binding	extracellular space,haptoglobin-hemoglobin complex,extracellular exosome,blood microparticle	sp	1	1	uniprot_mouse_proteome	>sp|Q61646|HPT_MOUSE Haptoglobin OS=Mus musculus GN=Hp PE=1 SV=1	8	8
TRUE	Old_Native / Young_Native	Old_Native	Young_Native	90	Q9CZ44;Q9CZ44-3	1.92389e+06	1685725	-0.19066	0.19066	-12.3795	0.876205	0	2.86091e-06	1.73351e-05	89	0.0365899	Q9CZ44;Q9CZ44-3	NSF1C_MOUSE	NSFL1 cofactor p47;Isoform 3 of NSFL1 cofactor p47	Nsfl1c	Q9CZ44;Q9CZ44-3	Mus musculus	autophagosome assembly,Golgi organization,nuclear envelope reassembly,proteasome-mediated ubiquitin-dependent protein catabolic process,regulation of catalytic activity,membrane fusion;	protein binding,phospholipid binding,protein phosphatase regulator activity,ubiquitin binding,ATPase binding;	nucleus,nucleoplasm,chromosome,Golgi stack,cytosol,plasma membrane,intermediate filament cytoskeleton,VCP-NSFL1C complex;	sp	1;	1;	uniprot_mouse_proteome	>sp|Q9CZ44|NSF1C_MOUSE NSFL1 cofactor p47 OS=Mus musculus GN=Nsfl1c PE=1 SV=1;>sp|Q9CZ44-3|NSF1C_MOUSE Isoform 3 of NSFL1 cofactor p47 OS=Mus musculus GN=Nsfl1c	14	18
TRUE	Old_Native / Young_Native	Old_Native	Young_Native	320	P06801	40872924	54913832	0.426024	0.426024	34.3526	1.34353	0	2.88119e-06	1.73644e-05	319	0.0830283	P06801	MAOX_MOUSE	NADP-dependent malic enzyme	Me1	P06801	Mus musculus	pyruvate metabolic process,malate metabolic process,response to hormone,protein tetramerization,oxidation-reduction process,regulation of NADP metabolic process	malic enzyme activity,malate dehydrogenase (decarboxylating) (NAD+) activity,malate dehydrogenase (decarboxylating) (NADP+) activity,protein binding,oxaloacetate decarboxylase activity,manganese ion binding,NAD binding	mitochondrion,cytosol	sp	1	2	uniprot_mouse_proteome	>sp|P06801|MAOX_MOUSE NADP-dependent malic enzyme OS=Mus musculus GN=Me1 PE=1 SV=2	32	64
TRUE	Old_Native / Young_Native	Old_Native	Young_Native	120	P58871	404772	449272	0.150479	0.150479	10.9938	1.10994	0	2.87784e-06	1.73644e-05	119	0.0444509	P58871	TB182_MOUSE	182 kDa tankyrase-1-binding protein	Tnks1bp1	P58871	Mus musculus	double-strand break repair,positive regulation of peptidyl-threonine phosphorylation,positive regulation of protein autophosphorylation,positive regulation of peptidyl-serine phosphorylation,cellular response to ionizing radiation	enzyme binding,macromolecular complex binding,cadherin binding,ankyrin repeat binding	nucleus,nuclear heterochromatin,cytoplasm,cytoskeleton,cell-cell adherens junction,CCR4-NOT complex	sp	1	2	uniprot_mouse_proteome	>sp|P58871|TB182_MOUSE 182 kDa tankyrase-1-binding protein OS=Mus musculus GN=Tnks1bp1 PE=1 SV=2	23	24
TRUE	Old_Native / Young_Native	Old_Native	Young_Native	35	G3UYY1;G3UZ26;P50431	619664	414516	-0.580061	0.580061	-33.1064	0.668936	0	2.90698e-06	1.7473e-05	34	0.107221	G3UYY1;G3UZ26;P50431	G3UYY1_MOUSE;G3UZ26_MOUSE;GLYC_MOUSE	Serine hydroxymethyltransferase (Fragment);Serine hydroxymethyltransferase (Fragment);Serine hydroxymethyltransferase, cytosolic	Shmt1	G3UYY1;G3UZ26;P50431	Mus musculus	;;dTMP biosynthetic process,glycine metabolic process,L-serine metabolic process,L-serine catabolic process,one-carbon metabolic process,purine nucleobase biosynthetic process,negative regulation of translation,glycine biosynthetic process from serine,tetrahydrofolate interconversion,tetrahydrofolate metabolic process,folic acid metabolic process,protein tetramerization,protein homotetramerizatio…	;;translation repressor activity, nucleic acid binding,glycine hydroxymethyltransferase activity,L-allo-threonine aldolase activity,pyridoxal phosphate binding,identical protein binding,protein homodimerization activity,mRNA 5'-UTR binding,serine binding	;;nucleus,mitochondrion,cytosol,extracellular exosome	tr;tr;sp	1	1;1;3	uniprot_mouse_proteome	>tr|G3UYY1|G3UYY1_MOUSE Serine hydroxymethyltransferase (Fragment) OS=Mus musculus GN=Shmt1 PE=1 SV=1;>tr|G3UZ26|G3UZ26_MOUSE Serine hydroxymethyltransferase (Fragment) OS=Mus musculus GN=Shmt1 PE=1 SV=1;>sp|P50431|GLYC_MOUSE Serine hydroxymethyltransferase, cytosolic OS=Mus musculus GN=Shmt1 PE=1 SV=3	7	7
TRUE	Old_Native / Young_Native	Old_Native	Young_Native	95	O35490	4412170	3.40816e+06	-0.372496	0.372496	-22.7555	0.772445	0	2.92008e-06	1.75049e-05	94	0.0931027	O35490	BHMT1_MOUSE	Betaine--homocysteine S-methyltransferase 1	Bhmt	O35490	Mus musculus	amino-acid betaine metabolic process,amino-acid betaine catabolic process,methionine biosynthetic process,methylation,L-methionine salvage	zinc ion binding,betaine-homocysteine S-methyltransferase activity	cytosol,extracellular exosome	sp	1	1	uniprot_mouse_proteome	>sp|O35490|BHMT1_MOUSE Betaine--homocysteine S-methyltransferase 1 OS=Mus musculus GN=Bhmt PE=1 SV=1	16	19
TRUE	Old_Native / Young_Native	Old_Native	Young_Native	60	F6YVP7;P62270	11549353	9947587	-0.215394	0.215394	-13.8689	0.861311	0	2.97365e-06	1.77787e-05	59	0.0591929	F6YVP7;P62270	F6YVP7_MOUSE;RS18_MOUSE	Protein Gm10260;40S ribosomal protein S18	Gm10260;Rps18	F6YVP7;P62270	Mus musculus	translation,ribosome biogenesis;translation,ribosome biogenesis	RNA binding,structural constituent of ribosome;RNA binding,structural constituent of ribosome,protein binding,rRNA binding,protein kinase binding	cytosol,small ribosomal subunit;nucleus,cytosol,focal adhesion,small ribosomal subunit,membrane,cytosolic small ribosomal subunit,extracellular matrix,extracellular exosome	tr;sp	3;1	2;3	uniprot_mouse_proteome	>tr|F6YVP7|F6YVP7_MOUSE Protein Gm10260 OS=Mus musculus GN=Gm10260 PE=3 SV=2;>sp|P62270|RS18_MOUSE 40S ribosomal protein S18 OS=Mus musculus GN=Rps18 PE=1 SV=3	9	12
TRUE	Old_Native / Young_Native	Old_Native	Young_Native	55	Q3ULJ0;Q3ULJ0-2	742898	927391	0.320013	0.320013	24.8342	1.24834	0	3.12516e-06	1.86349e-05	54	0.0557812	Q3ULJ0;Q3ULJ0-2	GPD1L_MOUSE	Glycerol-3-phosphate dehydrogenase 1-like protein;Isoform 2 of Glycerol-3-phosphate dehydrogenase 1-like protein	Gpd1l	Q3ULJ0;Q3ULJ0-2	Mus musculus	regulation of heart rate,carbohydrate metabolic process,NADH metabolic process,positive regulation of sodium ion transport,NAD metabolic process,negative regulation of peptidyl-serine phosphorylation,glycerol-3-phosphate catabolic process,oxidation-reduction process,regulation of ventricular cardiac muscle cell membrane depolarization,ventricular cardiac muscle cell action potential,negative regu…	glycerol-3-phosphate dehydrogenase [NAD+] activity,sodium channel regulator activity,protein homodimerization activity,ion channel binding,NAD binding;	plasma membrane,glycerol-3-phosphate dehydrogenase complex,membrane,extracellular exosome;	sp	1;	2;	uniprot_mouse_proteome	>sp|Q3ULJ0|GPD1L_MOUSE Glycerol-3-phosphate dehydrogenase 1-like protein OS=Mus musculus GN=Gpd1l PE=1 SV=2;>sp|Q3ULJ0-2|GPD1L_MOUSE Isoform 2 of Glycerol-3-phosphate dehydrogenase 1-like protein OS=Mus musculus GN=Gpd1l	11	11
TRUE	Old_Native / Young_Native	Old_Native	Young_Native	35	Q9QUH0	616025	742255	0.268926	0.268926	20.491	1.20491	0	3.24364e-06	1.92902e-05	34	0.0568128	Q9QUH0	GLRX1_MOUSE	Glutaredoxin-1	Glrx	Q9QUH0	Mus musculus	cell redox homeostasis,positive regulation of membrane potential,oxidation-reduction process,positive regulation of sodium ion transmembrane transporter activity	electron carrier activity,protein disulfide oxidoreductase activity,glutathione disulfide oxidoreductase activity,protein-disulfide reductase (glutathione) activity,protein N-terminus binding	nucleus,cytoplasm,mitochondrion,extracellular exosome	sp	1	3	uniprot_mouse_proteome	>sp|Q9QUH0|GLRX1_MOUSE Glutaredoxin-1 OS=Mus musculus GN=Glrx PE=1 SV=3	4	7
TRUE	Old_Native / Young_Native	Old_Native	Young_Native	30	P46412	1.35076e+06	1.66254e+06	0.299616	0.299616	23.0817	1.23082	0	3.35096e-06	1.98759e-05	29	0.0543607	P46412	GPX3_MOUSE	Glutathione peroxidase 3	Gpx3	P46412	Mus musculus	response to oxidative stress,hydrogen peroxide catabolic process,protein homotetramerization,oxidation-reduction process,cellular oxidant detoxification	glutathione peroxidase activity,selenium binding	extracellular space,extracellular exosome	sp	1	2	uniprot_mouse_proteome	>sp|P46412|GPX3_MOUSE Glutathione peroxidase 3 OS=Mus musculus GN=Gpx3 PE=1 SV=2	6	6
TRUE	Old_Native / Young_Native	Old_Native	Young_Native	205	Q99N16	6324372	13815383	1.12728	1.12728	118.447	2.18447	0	3.375e-06	1.99658e-05	204	0.216105	Q99N16	CP4F3_MOUSE	Leukotriene-B(4) omega-hydroxylase 2	Cyp4f3	Q99N16	Mus musculus	very long-chain fatty acid metabolic process,long-chain fatty acid metabolic process,regulation of blood pressure,drug metabolic process,arachidonic acid metabolic process,epoxygenase P450 pathway,negative regulation of icosanoid secretion,positive regulation of icosanoid secretion,leukotriene B4 catabolic process,vitamin E metabolic process,menaquinone catabolic process,phylloquinone catabolic p…	iron ion binding,arachidonic acid epoxygenase activity,oxidoreductase activity, acting on paired donors, with incorporation or reduction of molecular oxygen, NAD(P)H as one donor, and incorporation of one atom of oxygen,alkane 1-monooxygenase activity,heme binding,leukotriene-B4 20-monooxygenase activity,arachidonic acid omega-hydroxylase activity,alpha-tocopherol omega-hydroxylase activity,tocot…	cytoplasm,endoplasmic reticulum membrane,integral component of membrane,apical plasma membrane,organelle membrane,intracellular membrane-bounded organelle	sp	1	2	uniprot_mouse_proteome	>sp|Q99N16|CP4F3_MOUSE Leukotriene-B(4) omega-hydroxylase 2 OS=Mus musculus GN=Cyp4f3 PE=1 SV=2	24	41
TRUE	Old_Native / Young_Native	Old_Native	Young_Native	60	P24547	678398	545640	-0.314183	0.314183	-19.5694	0.804306	0	3.66349e-06	2.16156e-05	59	0.0721864	P24547	IMDH2_MOUSE	Inosine-5'-monophosphate dehydrogenase 2	Impdh2	P24547	Mus musculus	purine nucleotide biosynthetic process,GMP biosynthetic process,GTP biosynthetic process,lymphocyte proliferation,protein homotetramerization,oxidation-reduction process,retina development in camera-type eye,cellular response to interleukin-4	nucleotide binding,DNA binding,RNA binding,IMP dehydrogenase activity,metal ion binding	nucleus,cytoplasm,peroxisomal membrane,cytosol,membrane,extracellular exosome	sp	1	2	uniprot_mouse_proteome	>sp|P24547|IMDH2_MOUSE Inosine-5'-monophosphate dehydrogenase 2 OS=Mus musculus GN=Impdh2 PE=1 SV=2	12	12
TRUE	Old_Native / Young_Native	Old_Native	Young_Native	105	Q91WQ3	918902	852101	-0.108887	0.108887	-7.26967	0.927303	0	3.69266e-06	2.17306e-05	104	0.0259479	Q91WQ3	SYYC_MOUSE	Tyrosine--tRNA ligase, cytoplasmic	Yars	Q91WQ3	Mus musculus	tRNA aminoacylation for protein translation,tyrosyl-tRNA aminoacylation	tRNA binding,RNA binding,tyrosine-tRNA ligase activity,ATP binding	cytosol,nuclear body,aminoacyl-tRNA synthetase multienzyme complex,methionyl glutamyl tRNA synthetase complex	sp	1	3	uniprot_mouse_proteome	>sp|Q91WQ3|SYYC_MOUSE Tyrosine--tRNA ligase, cytoplasmic OS=Mus musculus GN=Yars PE=1 SV=3	21	21
TRUE	Old_Native / Young_Native	Old_Native	Young_Native	75	Q06890	1.68707e+06	2.57705e+06	0.611196	0.611196	52.7525	1.52753	0	3.80704e-06	2.23452e-05	74	0.112499	Q06890	CLUS_MOUSE	Clusterin	Clu	Q06890	Mus musculus	cell morphogenesis,microglial cell activation,response to virus,protein import,central nervous system myelin maintenance,positive regulation of proteasomal ubiquitin-dependent protein catabolic process,negative regulation of protein homooligomerization,positive regulation of protein homooligomerization,positive regulation of tumor necrosis factor production,positive regulation of apoptotic proces…	beta-amyloid binding,protein binding,ubiquitin protein ligase binding,protein complex binding,low-density lipoprotein particle receptor binding,misfolded protein binding,ATPase activity	extracellular space,nucleus,cytoplasm,mitochondrion,endoplasmic reticulum,cytosol,cell surface,extracellular matrix,mitochondrial membrane,spherical high-density lipoprotein particle,chromaffin granule,protein complex,perinuclear region of cytoplasm,extracellular exosome,blood microparticle,neurofibrillary tangle,apical dendrite,cell periphery	sp	1	1	uniprot_mouse_proteome	>sp|Q06890|CLUS_MOUSE Clusterin OS=Mus musculus GN=Clu PE=1 SV=1	11	15
TRUE	Old_Native / Young_Native	Old_Native	Young_Native	30	Q8BTS3	72456.9	89043.9	0.297395	0.297395	22.8923	1.22892	0	3.84449e-06	2.24478e-05	29	0.120555	Q8BTS3	Q8BTS3_MOUSE	Guanylate-binding protein 9	Gbp9	Q8BTS3	Mus musculus	defense response to protozoan,adhesion of symbiont to host,defense response to Gram-positive bacterium,cellular response to interferon-gamma	molecular_function,GTPase activity,GTP binding	symbiont-containing vacuole membrane,cytoplasmic vesicle,extracellular exosome	tr	1	1	uniprot_mouse_proteome	>tr|Q8BTS3|Q8BTS3_MOUSE Guanylate-binding protein 9 OS=Mus musculus GN=Gbp9 PE=1 SV=1	5	6
TRUE	Old_Native / Young_Native	Old_Native	Young_Native	15	A0A0G2JEK2;P63254	268866	414624	0.624916	0.624916	54.2121	1.54212	0	3.83805e-06	2.24478e-05	14	0.097348	A0A0G2JEK2;P63254	A0A0G2JEK2_MOUSE;CRIP1_MOUSE	Cysteine-rich protein 1	Crip1	A0A0G2JEK2;P63254	Mus musculus	;intrinsic apoptotic signaling pathway in response to DNA damage,response to zinc ion,cellular response to antibiotic,cellular response to UV-B	;AT DNA binding,zinc ion binding,DNA binding, bending,peptide binding	;cytoplasm	tr;sp	1	1;2	uniprot_mouse_proteome	>tr|A0A0G2JEK2|A0A0G2JEK2_MOUSE Cysteine-rich protein 1 OS=Mus musculus GN=Crip1 PE=1 SV=1;>sp|P63254|CRIP1_MOUSE Cysteine-rich protein 1 OS=Mus musculus GN=Crip1 PE=1 SV=2	2	3
TRUE	Old_Native / Young_Native	Old_Native	Young_Native	90	P31324	2.40504e+06	1890887	-0.346996	0.346996	-21.3781	0.786219	0	3.85827e-06	2.24699e-05	89	0.110926	P31324	KAP3_MOUSE	cAMP-dependent protein kinase type II-beta regulatory subunit	Prkar2b	P31324	Mus musculus	fatty acid metabolic process,learning,response to antipsychotic drug,response to clozapine,negative regulation of cAMP-dependent protein kinase activity	cAMP-dependent protein kinase inhibitor activity,protein binding,cAMP-dependent protein kinase regulator activity,protein kinase binding,protein domain specific binding,cAMP binding,ubiquitin protein ligase binding,protein kinase A catalytic subunit binding	cytoplasm,mitochondrial inner membrane,centrosome,plasma membrane,cAMP-dependent protein kinase complex,neuronal cell body,dendritic spine,dendritic shaft,membrane raft,perinuclear region of cytoplasm,extracellular exosome,ciliary base	sp	1	3	uniprot_mouse_proteome	>sp|P31324|KAP3_MOUSE cAMP-dependent protein kinase type II-beta regulatory subunit OS=Mus musculus GN=Prkar2b PE=1 SV=3	15	18
TRUE	Old_Native / Young_Native	Old_Native	Young_Native	30	Q9JKB3;Q9JKB3-2	571091	391050	-0.546368	0.546368	-31.5258	0.684742	0	3.96124e-06	2.301e-05	29	0.140035	Q9JKB3;Q9JKB3-2	YBOX3_MOUSE	Y-box-binding protein 3;Isoform 2 of Y-box-binding protein 3	Ybx3	Q9JKB3;Q9JKB3-2	Mus musculus	negative regulation of transcription from RNA polymerase II promoter,in utero embryonic development,transcription, DNA-templated,spermatogenesis,male gonad development,fertilization,negative regulation of apoptotic process,positive regulation of organ growth,negative regulation of skeletal muscle tissue development,negative regulation of necroptotic process,cellular response to tumor necrosis fac…	RNA polymerase II regulatory region sequence-specific DNA binding,transcriptional repressor activity, RNA polymerase II transcription regulatory region sequence-specific binding,DNA binding,single-stranded DNA binding,RNA binding,mRNA 3'-UTR binding,protein binding;	nucleus,cytoplasm,cytosol,gap junction,polysome,intracellular ribonucleoprotein complex;	sp	1;	2;	uniprot_mouse_proteome	>sp|Q9JKB3|YBOX3_MOUSE Y-box-binding protein 3 OS=Mus musculus GN=Ybx3 PE=1 SV=2;>sp|Q9JKB3-2|YBOX3_MOUSE Isoform 2 of Y-box-binding protein 3 OS=Mus musculus GN=Ybx3	5	6
TRUE	Old_Native / Young_Native	Old_Native	Young_Native	145	P46935	2.52834e+06	2.21035e+06	-0.193913	0.193913	-12.5769	0.874231	0	4.00064e-06	2.3179e-05	144	0.0506913	P46935	NEDD4_MOUSE	E3 ubiquitin-protein ligase NEDD4	Nedd4	P46935	Mus musculus	negative regulation of transcription from RNA polymerase II promoter,adaptive immune response,outflow tract morphogenesis,endocardial cushion development,protein monoubiquitination,protein targeting to lysosome,neuromuscular junction development,negative regulation of sodium ion transport,negative regulation of transcription from RNA polymerase II promoter in response to UV-induced DNA damage,pos…	protein binding,sodium channel inhibitor activity,protein domain specific binding,beta-2 adrenergic receptor binding,ionotropic glutamate receptor binding,ubiquitin binding,phosphoserine binding,phosphothreonine binding,ubiquitin protein ligase activity,RNA polymerase binding,proline-rich region binding	ubiquitin ligase complex,chromatin,cytoplasm,Golgi apparatus,cytosol,plasma membrane,cell cortex,membrane,dendritic spine,perinuclear region of cytoplasm,extracellular exosome	sp	1	3	uniprot_mouse_proteome	>sp|P46935|NEDD4_MOUSE E3 ubiquitin-protein ligase NEDD4 OS=Mus musculus GN=Nedd4 PE=1 SV=3	26	29
TRUE	Old_Native / Young_Native	Old_Native	Young_Native	20	Q61165	78303.7	111541	0.510417	0.510417	42.4462	1.42446	0	4.09896e-06	2.36875e-05	19	0.0830248	Q61165	SL9A1_MOUSE	Sodium/hydrogen exchanger 1	Slc9a1	Q61165	Mus musculus	sodium ion transport,cellular sodium ion homeostasis,regulation of pH,response to acidic pH,positive regulation of cardiac muscle hypertrophy,regulation of cardiac muscle contraction by calcium ion signaling,cell growth,positive regulation of cell growth,cellular response to insulin stimulus,positive regulation of mitochondrial membrane permeability,response to muscle stretch,response to drug,pos…	calmodulin binding,sodium:proton antiporter activity,potassium:proton antiporter activity,protein phosphatase 2B binding,calcium-dependent protein binding	nucleoplasm,cytoplasm,mitochondrion,endoplasmic reticulum,endoplasmic reticulum membrane,plasma membrane,integral component of plasma membrane,focal adhesion,cell surface,intercalated disc,membrane,basolateral plasma membrane,apical plasma membrane,T-tubule,membrane raft,perinuclear region of cytoplasm,extracellular exosome,cation-transporting ATPase complex	sp	1	1	uniprot_mouse_proteome	>sp|Q61165|SL9A1_MOUSE Sodium/hydrogen exchanger 1 OS=Mus musculus GN=Slc9a1 PE=1 SV=1	4	4
TRUE	Old_Native / Young_Native	Old_Native	Young_Native	10	A0A075B5T5	52731.6	290625	2.46242	2.46242	451.14	5.5114	0	4.33988e-06	2.50155e-05	9	0.256198	A0A075B5T5	A0A075B5T5_MOUSE	Protein Ighv1-5	Ighv1-5	A0A075B5T5	Mus musculus				tr	4	1	uniprot_mouse_proteome	>tr|A0A075B5T5|A0A075B5T5_MOUSE Protein Ighv1-5 OS=Mus musculus GN=Ighv1-5 PE=4 SV=1	2	2
TRUE	Old_Native / Young_Native	Old_Native	Young_Native	95	Q9CQA3	4.13922e+06	5.40698e+06	0.385462	0.385462	30.6278	1.30628	0	4.60869e-06	2.6497e-05	94	0.0644865	Q9CQA3	SDHB_MOUSE	Succinate dehydrogenase [ubiquinone] iron-sulfur subunit, mitochondrial	Sdhb	Q9CQA3	Mus musculus	tricarboxylic acid cycle,succinate metabolic process,aerobic respiration,respiratory electron transport chain	succinate dehydrogenase (ubiquinone) activity,electron carrier activity,metal ion binding,ubiquinone binding,2 iron, 2 sulfur cluster binding,3 iron, 4 sulfur cluster binding,4 iron, 4 sulfur cluster binding	nucleoplasm,mitochondrion,mitochondrial inner membrane,mitochondrial respiratory chain complex II, succinate dehydrogenase complex (ubiquinone),plasma membrane,respiratory chain complex II,extracellular exosome	sp	1	1	uniprot_mouse_proteome	>sp|Q9CQA3|SDHB_MOUSE Succinate dehydrogenase [ubiquinone] iron-sulfur subunit, mitochondrial OS=Mus musculus GN=Sdhb PE=1 SV=1	13	19
TRUE	Old_Native / Young_Native	Old_Native	Young_Native	105	P19157	9894499	12918601	0.384751	0.384751	30.5635	1.30563	0	4.96478e-06	2.84715e-05	104	0.0535447	P19157	GSTP1_MOUSE	Glutathione S-transferase P 1	Gstp1	P19157	Mus musculus	response to reactive oxygen species,negative regulation of acute inflammatory response,glutathione metabolic process,xenobiotic metabolic process,response to toxic substance,negative regulation of biosynthetic process,oligodendrocyte development,animal organ regeneration,response to nutrient levels,response to estradiol,negative regulation of interleukin-1 beta production,negative regulation of t…	glutathione transferase activity,glutathione peroxidase activity,protein binding,drug binding,JUN kinase binding,kinase regulator activity,S-nitrosoglutathione binding,dinitrosyl-iron complex binding	extracellular space,intracellular,nucleus,cytoplasm,mitochondrion,cytosol,plasma membrane,vesicle,protein complex,extracellular exosome,TRAF2-GSTP1 complex	sp	1	2	uniprot_mouse_proteome	>sp|P19157|GSTP1_MOUSE Glutathione S-transferase P 1 OS=Mus musculus GN=Gstp1 PE=1 SV=2	10	21
TRUE	Old_Native / Young_Native	Old_Native	Young_Native	35	Q62426	1.41294e+06	1.71627e+06	0.280574	0.280574	21.4678	1.21468	0	5.00689e-06	2.85672e-05	34	0.0688237	Q62426	CYTB_MOUSE	Cystatin-B	Cstb	Q62426	Mus musculus	adult locomotory behavior,negative regulation of peptidase activity,negative regulation of endopeptidase activity,negative regulation of proteolysis	protease binding,RNA binding,endopeptidase inhibitor activity,cysteine-type endopeptidase inhibitor activity	extracellular space,nucleus,nucleolus,cytoplasm,cytosol,extracellular exosome	sp	1	1	uniprot_mouse_proteome	>sp|Q62426|CYTB_MOUSE Cystatin-B OS=Mus musculus GN=Cstb PE=1 SV=1	5	7
TRUE	Old_Native / Young_Native	Old_Native	Young_Native	25	P29351;P29351-2;P29351-3	112782	173521	0.621581	0.621581	53.8561	1.53856	0	4.99573e-06	2.85672e-05	24	0.113113	P29351;P29351-2;P29351-3	PTN6_MOUSE	Tyrosine-protein phosphatase non-receptor type 6;Isoform 2 of Tyrosine-protein phosphatase non-receptor type 6;Isoform 3 of Tyrosine-protein phosphatase non-receptor type 6	Ptpn6	P29351;P29351-2;P29351-3	Mus musculus	hematopoietic progenitor cell differentiation,negative regulation of humoral immune response mediated by circulating immunoglobulin,protein dephosphorylation,cell proliferation,positive regulation of cell proliferation,positive regulation of phosphatidylinositol 3-kinase signaling,peptidyl-tyrosine phosphorylation,cytokine-mediated signaling pathway,cell differentiation,platelet formation,abortiv…	phosphotyrosine binding,protein tyrosine phosphatase activity,transmembrane receptor protein tyrosine phosphatase activity,protein binding,SH3 domain binding,protein kinase binding,SH2 domain binding,cell adhesion molecule binding;;	nucleus,nucleolus,cytoplasm,cytosol,cell-cell junction,alpha-beta T cell receptor complex,protein complex,extracellular exosome;;	sp	1;;	2;;	uniprot_mouse_proteome	>sp|P29351|PTN6_MOUSE Tyrosine-protein phosphatase non-receptor type 6 OS=Mus musculus GN=Ptpn6 PE=1 SV=2;>sp|P29351-2|PTN6_MOUSE Isoform 2 of Tyrosine-protein phosphatase non-receptor type 6 OS=Mus musculus GN=Ptpn6;>sp|P29351-3|PTN6_MOUSE Isoform 3 of Tyrosine-protein phosphatase non-receptor type 6 OS=Mus musculus GN=Ptpn6	5	5
TRUE	Old_Native / Young_Native	Old_Native	Young_Native	70	Q62351	337736	276040	-0.291023	0.291023	-18.2678	0.817322	0	5.15042e-06	2.93118e-05	69	0.0932726	Q62351	TFR1_MOUSE	Transferrin receptor protein 1	Tfrc	Q62351	Mus musculus	cellular iron ion homeostasis,osteoclast differentiation,positive regulation of B cell proliferation,receptor internalization,cellular response to extracellular stimulus,transferrin transport,iron ion transmembrane transport,cellular response to drug,positive regulation of T cell proliferation,positive regulation of bone resorption,positive regulation of isotype switching,cellular response to iro…	RNA binding,double-stranded RNA binding,transferrin receptor activity,iron ion transmembrane transporter activity,protein binding,transferrin transmembrane transporter activity,identical protein binding,protein homodimerization activity	extracellular region,extracellular space,endosome,early endosome,plasma membrane,integral component of plasma membrane,clathrin-coated pit,external side of plasma membrane,cell surface,endosome membrane,membrane,basolateral plasma membrane,cytoplasmic vesicle,melanosome,perinuclear region of cytoplasm,recycling endosome,extracellular exosome,blood microparticle,extracellular vesicle,HFE-transferr…	sp	1	1	uniprot_mouse_proteome	>sp|Q62351|TFR1_MOUSE Transferrin receptor protein 1 OS=Mus musculus GN=Tfrc PE=1 SV=1	14	14
TRUE	Old_Native / Young_Native	Old_Native	Young_Native	20	Q99JY8	350977	479295	0.449537	0.449537	36.5602	1.3656	0	5.20508e-06	2.9548e-05	19	0.0625231	Q99JY8	PLPP3_MOUSE	Phospholipid phosphatase 3	Plpp3	Q99JY8	Mus musculus	blood vessel development,gastrulation with mouth forming second,negative regulation of protein phosphorylation,phospholipid metabolic process,cell adhesion,regulation of Wnt signaling pathway,homotypic cell-cell adhesion,canonical Wnt signaling pathway involved in positive regulation of endothelial cell migration,canonical Wnt signaling pathway involved in positive regulation of cell-cell adhesio…	integrin binding,phosphatidate phosphatase activity,sphingosine-1-phosphate phosphatase activity,lipid phosphatase activity	endoplasmic reticulum membrane,Golgi apparatus,plasma membrane,integral component of plasma membrane,extracellular exosome	sp	1	1	uniprot_mouse_proteome	>sp|Q99JY8|PLPP3_MOUSE Phospholipid phosphatase 3 OS=Mus musculus GN=Plpp3 PE=1 SV=1	4	4
TRUE	Old_Native / Young_Native	Old_Native	Young_Native	60	O35074	712254	579222	-0.298276	0.298276	-18.6777	0.813223	0	5.48874e-06	3.10798e-05	59	0.0680979	O35074	PTGIS_MOUSE	Prostacyclin synthase	Ptgis	O35074	Mus musculus	prostaglandin biosynthetic process,embryo implantation,negative regulation of NF-kappaB transcription factor activity,positive regulation of peroxisome proliferator activated receptor signaling pathway,regulation of apoptotic process,negative regulation of nitric oxide biosynthetic process,positive regulation of angiogenesis,decidualization,negative regulation of inflammatory response,oxidation-r…	monooxygenase activity,iron ion binding,prostaglandin-I synthase activity,oxidoreductase activity, acting on paired donors, with incorporation or reduction of molecular oxygen,heme binding	extracellular space,nucleus,cytoplasm,endoplasmic reticulum,endoplasmic reticulum membrane,caveola,integral component of membrane	sp	1	1	uniprot_mouse_proteome	>sp|O35074|PTGIS_MOUSE Prostacyclin synthase OS=Mus musculus GN=Ptgis PE=1 SV=1	11	12
TRUE	Old_Native / Young_Native	Old_Native	Young_Native	90	P49586	1.28886e+06	1.87487e+06	0.540701	0.540701	45.4679	1.45468	0	5.61687e-06	3.17254e-05	89	0.116911	P49586	PCY1A_MOUSE	Choline-phosphate cytidylyltransferase A	Pcyt1a	P49586	Mus musculus	phosphatidylcholine biosynthetic process,CDP-choline pathway	choline-phosphate cytidylyltransferase activity,protein binding,calmodulin binding,phosphatidylcholine binding,protein homodimerization activity	nuclear envelope,endoplasmic reticulum membrane,cytosol,plasma membrane,glycogen granule	sp	1	1	uniprot_mouse_proteome	>sp|P49586|PCY1A_MOUSE Choline-phosphate cytidylyltransferase A OS=Mus musculus GN=Pcyt1a PE=1 SV=1	14	18
TRUE	Old_Native / Young_Native	Old_Native	Young_Native	40	Q9WUU7	1.20071e+06	1.51652e+06	0.336881	0.336881	26.3023	1.26302	0	5.87656e-06	3.3109e-05	39	0.0524451	Q9WUU7	CATZ_MOUSE	Cathepsin Z	Ctsz	Q9WUU7	Mus musculus	proteolysis,negative regulation of plasminogen activation,negative regulation of neuron projection development,negative regulation of protein binding,positive regulation of neuron apoptotic process,proteolysis involved in cellular protein catabolic process,epithelial tube branching involved in lung morphogenesis,regulation of neuron death,positive regulation of neural precursor cell proliferation	carboxypeptidase activity,cysteine-type endopeptidase activity	extracellular space,lysosome,endoplasmic reticulum,cell surface,growth cone,cytoplasmic vesicle,intracellular membrane-bounded organelle,extracellular exosome,cell cortex region	sp	1	1	uniprot_mouse_proteome	>sp|Q9WUU7|CATZ_MOUSE Cathepsin Z OS=Mus musculus GN=Ctsz PE=1 SV=1	7	8
TRUE	Old_Native / Young_Native	Old_Native	Young_Native	55	Q9CZR8	743225	610700	-0.283336	0.283336	-17.8311	0.821689	0	5.89415e-06	3.31251e-05	54	0.0598084	Q9CZR8	EFTS_MOUSE	Elongation factor Ts, mitochondrial	Tsfm	Q9CZR8	Mus musculus	mitochondrial translational elongation,regulation of mitochondrial translation	RNA binding,translation elongation factor activity	nucleus,mitochondrion,mitochondrial matrix	sp	1	1	uniprot_mouse_proteome	>sp|Q9CZR8|EFTS_MOUSE Elongation factor Ts, mitochondrial OS=Mus musculus GN=Tsfm PE=1 SV=1	9	11
TRUE	Old_Native / Young_Native	Old_Native	Young_Native	30	Q8C788	383214	290473	-0.399747	0.399747	-24.2009	0.757991	0	6.22036e-06	3.48713e-05	29	0.066929	Q8C788	Q8C788_MOUSE	Sorting nexin	Snx18	Q8C788	Mus musculus				tr	1	1	uniprot_mouse_proteome	>tr|Q8C788|Q8C788_MOUSE Sorting nexin OS=Mus musculus GN=Snx18 PE=1 SV=1	6	6
TRUE	Old_Native / Young_Native	Old_Native	Young_Native	115	Q9Z204-2	7.34768e+06	6.55384e+06	-0.164948	0.164948	-10.804	0.89196	0	6.27947e-06	3.5072e-05	114	0.0668074	Q9Z204-2	HNRPC_MOUSE	Isoform C1 of Heterogeneous nuclear ribonucleoproteins C1/C2	Hnrnpc	Q9Z204-2	Mus musculus				sp			uniprot_mouse_proteome	>sp|Q9Z204-2|HNRPC_MOUSE Isoform C1 of Heterogeneous nuclear ribonucleoproteins C1/C2 OS=Mus musculus GN=Hnrnpc	14	23
TRUE	Old_Native / Young_Native	Old_Native	Young_Native	90	P62281	6.49567e+06	5.55825e+06	-0.224848	0.224848	-14.4315	0.855685	0	6.28738e-06	3.5072e-05	89	0.0388154	P62281	RS11_MOUSE	40S ribosomal protein S11	Rps11	P62281	Mus musculus	osteoblast differentiation,translation	RNA binding,structural constituent of ribosome,rRNA binding	nucleolus,cytoplasm,focal adhesion,membrane,cytosolic small ribosomal subunit,extracellular matrix,extracellular exosome	sp	1	3	uniprot_mouse_proteome	>sp|P62281|RS11_MOUSE 40S ribosomal protein S11 OS=Mus musculus GN=Rps11 PE=1 SV=3	12	18
TRUE	Old_Native / Young_Native	Old_Native	Young_Native	25	A2A6J4;A2A6J7;P19973;P19973-2	84226.1	138740	0.720049	0.720049	64.7238	1.64724	0	6.40012e-06	3.56125e-05	24	0.137713	A2A6J4;A2A6J7;P19973;P19973-2	A2A6J4_MOUSE;A2A6J7_MOUSE;LSP1_MOUSE;LSP1_MOUSE	Lymphocyte-specific protein 1;Lymphocyte-specific protein 1;Lymphocyte-specific protein 1;Isoform 2 of Lymphocyte-specific protein 1	Lsp1	A2A6J4;A2A6J7;P19973;P19973-2	Mus musculus	;;apoptotic process,chemotaxis,defense response,cytoskeleton organization,signal transduction;	;;actin binding,signal transducer activity;	;;plasma membrane,membrane,extracellular exosome;	tr;tr;sp;sp	1;1;1;	1;1;2;	uniprot_mouse_proteome	>tr|A2A6J4|A2A6J4_MOUSE Lymphocyte-specific protein 1 OS=Mus musculus GN=Lsp1 PE=1 SV=1;>tr|A2A6J7|A2A6J7_MOUSE Lymphocyte-specific protein 1 OS=Mus musculus GN=Lsp1 PE=1 SV=1;>sp|P19973|LSP1_MOUSE Lymphocyte-specific protein 1 OS=Mus musculus GN=Lsp1 PE=1 SV=2;>sp|P19973-2|LSP1_MOUSE Isoform 2 of Lymphocyte-specific protein 1 OS=Mus musculus GN=Lsp1	5	5
TRUE	Old_Native / Young_Native	Old_Native	Young_Native	240	P27546;P27546-2	4200174	3.42906e+06	-0.292634	0.292634	-18.359	0.81641	0	6.53946e-06	3.62981e-05	239	0.0361241	P27546;P27546-2	MAP4_MOUSE	Microtubule-associated protein 4;Isoform 2 of Microtubule-associated protein 4	Map4	P27546;P27546-2	Mus musculus	mitotic spindle organization,neuron projection development,microtubule sliding,establishment of spindle orientation,cell division,negative regulation of nonmotile primary cilium assembly;	RNA binding,protein binding,microtubule binding;	cytoplasm,microtubule,microtubule associated complex,axoneme,postsynaptic density,neuron projection,extracellular exosome,mitotic spindle;	sp	1;	3;	uniprot_mouse_proteome	>sp|P27546|MAP4_MOUSE Microtubule-associated protein 4 OS=Mus musculus GN=Map4 PE=1 SV=3;>sp|P27546-2|MAP4_MOUSE Isoform 2 of Microtubule-associated protein 4 OS=Mus musculus GN=Map4	36	48
TRUE	Old_Native / Young_Native	Old_Native	Young_Native	15	Q9CWE6	616563	94576.4	-2.70469	2.70469	-84.6607	0.153393	0	7.18442e-06	3.97797e-05	14	0.385324	Q9CWE6	OOEP_MOUSE	Oocyte-expressed protein homolog	Ooep	Q9CWE6	Mus musculus	in utero embryonic development,protein phosphorylation,embryo implantation,fertilization,embryonic pattern specification,establishment or maintenance of apical/basal cell polarity,cellular protein complex assembly	RNA binding,protein binding	cell cortex,protein complex,apical part of cell	sp	1	1	uniprot_mouse_proteome	>sp|Q9CWE6|OOEP_MOUSE Oocyte-expressed protein homolog OS=Mus musculus GN=Ooep PE=1 SV=1	3	3
TRUE	Old_Native / Young_Native	Old_Native	Young_Native	90	Q61584;Q61584-3;Q61584-4	1152480	1.03436e+06	-0.156008	0.156008	-10.2495	0.897505	0	7.2363e-06	3.99686e-05	89	0.0513791	Q61584;Q61584-3;Q61584-4	FXR1_MOUSE	Fragile X mental retardation syndrome-related protein 1;Isoform B of Fragile X mental retardation syndrome-related protein 1;Isoform C of Fragile X mental retardation syndrome-related protein 1	Fxr1	Q61584;Q61584-3;Q61584-4	Mus musculus	muscle organ development,negative regulation of translation,cell differentiation,positive regulation of gene silencing by miRNA;;	G-quadruplex RNA binding,RNA binding,mRNA 3'-UTR binding,protein binding,RNA strand annealing activity,protein homodimerization activity,protein heterodimerization activity;;	nucleus,cytoplasm,cytosol,polysome,membrane,axon,dendrite,ribonucleoprotein granule,costamere,dendritic spine,perinuclear region of cytoplasm;;	sp	1;;	2;;	uniprot_mouse_proteome	>sp|Q61584|FXR1_MOUSE Fragile X mental retardation syndrome-related protein 1 OS=Mus musculus GN=Fxr1 PE=1 SV=2;>sp|Q61584-3|FXR1_MOUSE Isoform B of Fragile X mental retardation syndrome-related protein 1 OS=Mus musculus GN=Fxr1;>sp|Q61584-4|FXR1_MOUSE Isoform C of Fragile X mental retardation syndrome-related protein 1 OS=Mus musculus GN=Fxr1	18	18
TRUE	Old_Native / Young_Native	Old_Native	Young_Native	70	D3YVL0;D3Z3E8;E9PW39;P23249	323594	235493	-0.458503	0.458503	-27.2259	0.727741	0	7.34109e-06	4.0448e-05	69	0.0964479	D3YVL0;D3Z3E8;E9PW39;P23249	D3YVL0_MOUSE;D3Z3E8_MOUSE;E9PW39_MOUSE;MOV10_MOUSE	Putative helicase MOV-10	Mov10	D3YVL0;D3Z3E8;E9PW39;P23249	Mus musculus	;;;gene silencing by miRNA,mRNA cleavage involved in gene silencing by miRNA	;;;RNA binding,helicase activity,protein binding,ATP binding	;;;cytoplasmic mRNA processing body,extracellular space,cytosol	tr;tr;tr;sp	1	2;1;1;2	uniprot_mouse_proteome	>tr|D3YVL0|D3YVL0_MOUSE Putative helicase MOV-10 OS=Mus musculus GN=Mov10 PE=1 SV=2;>tr|D3Z3E8|D3Z3E8_MOUSE Putative helicase MOV-10 OS=Mus musculus GN=Mov10 PE=1 SV=1;>tr|E9PW39|E9PW39_MOUSE Putative helicase MOV-10 OS=Mus musculus GN=Mov10 PE=1 SV=1;>sp|P23249|MOV10_MOUSE Putative helicase MOV-10 OS=Mus musculus GN=Mov10 PE=1 SV=2	13	14
TRUE	Old_Native / Young_Native	Old_Native	Young_Native	40	Q9QZ08	459628	546138	0.248797	0.248797	18.8216	1.18822	0	7.54213e-06	4.14541e-05	39	0.0453417	Q9QZ08	NAGK_MOUSE	N-acetyl-D-glucosamine kinase	Nagk	Q9QZ08	Mus musculus	N-acetylglucosamine metabolic process,N-acetylneuraminate catabolic process,carbohydrate phosphorylation	ATP binding,N-acylmannosamine kinase activity,N-acetylglucosamine kinase activity	extracellular exosome	sp	1	3	uniprot_mouse_proteome	>sp|Q9QZ08|NAGK_MOUSE N-acetyl-D-glucosamine kinase OS=Mus musculus GN=Nagk PE=1 SV=3	8	8
TRUE	Old_Native / Young_Native	Old_Native	Young_Native	80	Q8CI59	1.38935e+06	1.79405e+06	0.368804	0.368804	29.1282	1.29128	0	7.67585e-06	4.20861e-05	79	0.0805929	Q8CI59	STEA3_MOUSE	Metalloreductase STEAP3	Steap3	Q8CI59	Mus musculus	iron ion transport,apoptotic process,cell cycle,protein secretion,copper ion import,iron ion homeostasis,oxidation-reduction process,ferric iron import across plasma membrane,positive regulation of intrinsic apoptotic signaling pathway in response to DNA damage by p53 class mediator,exosomal secretion	ferric-chelate reductase activity,protein binding,cupric reductase activity,metal ion binding,ferric-chelate reductase (NADPH) activity	cytoplasm,endosome,multivesicular body,plasma membrane,integral component of plasma membrane,endosome membrane	sp	1	1	uniprot_mouse_proteome	>sp|Q8CI59|STEA3_MOUSE Metalloreductase STEAP3 OS=Mus musculus GN=Steap3 PE=1 SV=1	14	16
TRUE	Old_Native / Young_Native	Old_Native	Young_Native	120	Q64133	8859912	14031617	0.663317	0.663317	58.372	1.58372	0	7.71042e-06	4.21728e-05	119	0.162848	Q64133	AOFA_MOUSE	Amine oxidase [flavin-containing] A	Maoa	Q64133	Mus musculus	neurotransmitter catabolic process,dopamine catabolic process,oxidation-reduction process	protein binding,primary amine oxidase activity	mitochondrion,mitochondrial outer membrane,integral component of membrane	sp	1	3	uniprot_mouse_proteome	>sp|Q64133|AOFA_MOUSE Amine oxidase [flavin-containing] A OS=Mus musculus GN=Maoa PE=1 SV=3	19	24
TRUE	Old_Native / Young_Native	Old_Native	Young_Native	50	P43275	4483292	2.14632e+06	-1.06269	1.06269	-52.1263	0.478737	0	8.31634e-06	4.52667e-05	49	0.283394	P43275	H11_MOUSE	Histone H1.1	Hist1h1a	P43275	Mus musculus	nucleosome assembly,spermatogenesis,positive regulation of receptor-mediated endocytosis	DNA binding,protein binding,heparin binding,chromatin DNA binding	nucleosome,nucleus,nuclear euchromatin,cell surface,vesicle	sp	1	2	uniprot_mouse_proteome	>sp|P43275|H11_MOUSE Histone H1.1 OS=Mus musculus GN=Hist1h1a PE=1 SV=2	6	10
TRUE	Old_Native / Young_Native	Old_Native	Young_Native	20	Q61142;Q61142-2	253417	180651	-0.488308	0.488308	-28.7139	0.712861	0	8.31466e-06	4.52667e-05	19	0.0760237	Q61142;Q61142-2	SPIN1_MOUSE	Spindlin-1;Isoform 2 of Spindlin-1	Spin1	Q61142;Q61142-2	Mus musculus	female meiotic division,multicellular organism development,rRNA transcription,Wnt signaling pathway,chromatin modification,positive regulation of Wnt signaling pathway;	DNA binding,methylated histone binding;	nucleus,nucleoplasm,nucleolus,spindle,cytosol,nuclear membrane;	sp	1;	2;	uniprot_mouse_proteome	>sp|Q61142|SPIN1_MOUSE Spindlin-1 OS=Mus musculus GN=Spin1 PE=1 SV=2;>sp|Q61142-2|SPIN1_MOUSE Isoform 2 of Spindlin-1 OS=Mus musculus GN=Spin1	4	4
TRUE	Old_Native / Young_Native	Old_Native	Young_Native	25	Q8K183	244076	304397	0.318626	0.318626	24.7142	1.24714	0	8.5154e-06	4.62382e-05	24	0.0563248	Q8K183	PDXK_MOUSE	Pyridoxal kinase	Pdxk	Q8K183	Mus musculus	cell proliferation,pyridoxal 5'-phosphate salvage,phosphorylation,pyridoxal phosphate biosynthetic process	magnesium ion binding,ATP binding,zinc ion binding,pyridoxal kinase activity,pyridoxal phosphate binding,potassium ion binding,sodium ion binding,lithium ion binding,protein homodimerization activity	nucleus,cytosol,extracellular exosome	sp	1	1	uniprot_mouse_proteome	>sp|Q8K183|PDXK_MOUSE Pyridoxal kinase OS=Mus musculus GN=Pdxk PE=1 SV=1	4	5
TRUE	Old_Native / Young_Native	Old_Native	Young_Native	170	E9Q8N5;Q08EB6;Q8BRT1	1.1184e+06	1.36464e+06	0.287083	0.287083	22.017	1.22017	0	8.62796e-06	4.67365e-05	169	0.0704507	E9Q8N5;Q08EB6;Q8BRT1	E9Q8N5_MOUSE;Q08EB6_MOUSE;CLAP2_MOUSE	CLIP-associating protein 2;CLIP associating protein 2;CLIP-associating protein 2	Clasp2	E9Q8N5;Q08EB6;Q8BRT1	Mus musculus	;;microtubule cytoskeleton organization,vesicle targeting,microtubule nucleation,negative regulation of microtubule depolymerization,Golgi organization,mitotic spindle organization,establishment or maintenance of cell polarity,exit from mitosis,regulation of gastrulation,positive regulation of epithelial cell migration,regulation of epithelial to mesenchymal transition,cell migration,regulation o…	;;dystroglycan binding,protein binding,microtubule binding,microtubule plus-end binding,actin filament binding,protein tyrosine kinase binding	;;condensed chromosome kinetochore,spindle pole,Golgi apparatus,trans-Golgi network,microtubule organizing center,cytosol,microtubule,cytoplasmic microtubule,plasma membrane,cell cortex,membrane,cell leading edge,ruffle membrane,axonal growth cone,basal cortex,cortical microtubule plus-end,kinetochore,focal adhesion,mitotic spindle	tr;tr;sp	1	1	uniprot_mouse_proteome	>tr|E9Q8N5|E9Q8N5_MOUSE CLIP-associating protein 2 OS=Mus musculus GN=Clasp2 PE=1 SV=1;>tr|Q08EB6|Q08EB6_MOUSE CLIP associating protein 2 OS=Mus musculus GN=Clasp2 PE=1 SV=1;>sp|Q8BRT1|CLAP2_MOUSE CLIP-associating protein 2 OS=Mus musculus GN=Clasp2 PE=1 SV=1	32	34
TRUE	Old_Native / Young_Native	Old_Native	Young_Native	15	Q8C2W8	85370.6	24856.2	-1.78013	1.78013	-70.8843	0.291157	0	9.07574e-06	4.90439e-05	14	0.284611	Q8C2W8	Q8C2W8_MOUSE	Protein Fbxw19	Fbxw19	Q8C2W8	Mus musculus	biological_process	molecular_function	cellular_component	tr	2	1	uniprot_mouse_proteome	>tr|Q8C2W8|Q8C2W8_MOUSE Protein Fbxw19 OS=Mus musculus GN=Fbxw19 PE=2 SV=1	3	3
TRUE	Old_Native / Young_Native	Old_Native	Young_Native	20	O88947;Q3U3V1	78621.6	107407	0.450094	0.450094	36.6129	1.36613	0	9.34766e-06	5.03922e-05	19	0.0713479	O88947;Q3U3V1	FA10_MOUSE;Q3U3V1_MOUSE	Coagulation factor X	F10	O88947;Q3U3V1	Mus musculus	proteolysis,blood coagulation,positive regulation of protein kinase B signaling;	serine-type endopeptidase activity,calcium ion binding,phospholipid binding;	extracellular region;	sp;tr	1	1	uniprot_mouse_proteome	>sp|O88947|FA10_MOUSE Coagulation factor X OS=Mus musculus GN=F10 PE=1 SV=1;>tr|Q3U3V1|Q3U3V1_MOUSE Coagulation factor X OS=Mus musculus GN=F10 PE=1 SV=1	4	4
TRUE	Old_Native / Young_Native	Old_Native	Young_Native	65	D3YZC9	1314052	1.09043e+06	-0.269131	0.269131	-17.0181	0.829819	0	1.01953e-05	5.48302e-05	64	0.0678363	D3YZC9	D3YZC9_MOUSE	Splicing factor 1	Sf1	D3YZC9	Mus musculus				tr	1	1	uniprot_mouse_proteome	>tr|D3YZC9|D3YZC9_MOUSE Splicing factor 1 OS=Mus musculus GN=Sf1 PE=1 SV=1	11	13
TRUE	Old_Native / Young_Native	Old_Native	Young_Native	35	G3X9I1;G5E911;Q91VU0	568356	445803	-0.35039	0.35039	-21.5628	0.784372	0	1.06426e-05	5.70992e-05	34	0.0794489	G3X9I1;G5E911;Q91VU0	G3X9I1_MOUSE;G5E911_MOUSE;FAM3C_MOUSE	DNA segment, Chr 6, Wayne State University 176, expressed, isoform CRA_a;DNA segment, Chr 6, Wayne State University 176, expressed, isoform CRA_f;Protein FAM3C	Fam3c	G3X9I1;G5E911;Q91VU0	Mus musculus	;;multicellular organism development,biological_process	;;molecular_function	;;extracellular space,cytoplasmic vesicle,extracellular exosome	tr;tr;sp	1	1	uniprot_mouse_proteome	>tr|G3X9I1|G3X9I1_MOUSE DNA segment, Chr 6, Wayne State University 176, expressed, isoform CRA_a OS=Mus musculus GN=Fam3c PE=1 SV=1;>tr|G5E911|G5E911_MOUSE DNA segment, Chr 6, Wayne State University 176, expressed, isoform CRA_f OS=Mus musculus GN=Fam3c PE=1 SV=1;>sp|Q91VU0|FAM3C_MOUSE Protein FAM3C OS=Mus musculus GN=Fam3c PE=1 SV=1	7	7
TRUE	Old_Native / Young_Native	Old_Native	Young_Native	25	Q08EC7;Q64GA5	789311	724392	-0.123822	0.123822	-8.22468	0.917753	0	1.08889e-05	5.82818e-05	24	0.271607	Q08EC7;Q64GA5	Q08EC7_MOUSE;Q64GA5_MOUSE	Pla2g4c protein;Egg and early embryo abundant protein	Pla2g4c	Q08EC7;Q64GA5	Mus musculus	;glycerophospholipid catabolic process	;calcium-independent phospholipase A2 activity,Requires Ontology	;nuclear envelope,nucleoplasm,spindle,cell cortex	tr	1	1	uniprot_mouse_proteome	>tr|Q08EC7|Q08EC7_MOUSE Pla2g4c protein OS=Mus musculus GN=Pla2g4c PE=1 SV=1;>tr|Q64GA5|Q64GA5_MOUSE Egg and early embryo abundant protein OS=Mus musculus GN=Pla2g4c PE=1 SV=1	5	5
TRUE	Old_Native / Young_Native	Old_Native	Young_Native	80	Q8CGF7;Q8CGF7-2	591418	480430	-0.29985	0.29985	-18.7663	0.812337	0	1.09863e-05	5.86633e-05	79	0.076355	Q8CGF7;Q8CGF7-2	TCRG1_MOUSE	Transcription elongation regulator 1;Isoform 2 of Transcription elongation regulator 1	Tcerg1	Q8CGF7;Q8CGF7-2	Mus musculus	negative regulation of transcription from RNA polymerase II promoter,transcription, DNA-templated;	RNA polymerase II repressing transcription factor binding,RNA polymerase II transcription corepressor activity,transcription factor activity, sequence-specific DNA binding,RNA binding,identical protein binding,proline-rich region binding;	nucleoplasm;	sp	1;	2;	uniprot_mouse_proteome	>sp|Q8CGF7|TCRG1_MOUSE Transcription elongation regulator 1 OS=Mus musculus GN=Tcerg1 PE=1 SV=2;>sp|Q8CGF7-2|TCRG1_MOUSE Isoform 2 of Transcription elongation regulator 1 OS=Mus musculus GN=Tcerg1	15	16
TRUE	Old_Native / Young_Native	Old_Native	Young_Native	175	Q9ERK4	1.86281e+06	1.80741e+06	-0.0435557	0.0435557	-2.97393	0.970261	0	1.12925e-05	6.01551e-05	174	0.0340523	Q9ERK4	XPO2_MOUSE	Exportin-2	Cse1l	Q9ERK4	Mus musculus	protein import into nucleus,protein export from nucleus	nuclear export signal receptor activity,protein binding,Ran GTPase binding	nuclear envelope,nucleoplasm,cytosol,membrane,extracellular exosome	sp	1	1	uniprot_mouse_proteome	>sp|Q9ERK4|XPO2_MOUSE Exportin-2 OS=Mus musculus GN=Cse1l PE=1 SV=1	31	35
TRUE	Old_Native / Young_Native	Old_Native	Young_Native	140	Q9D0I9	1.49857e+06	1.36097e+06	-0.13895	0.13895	-9.18203	0.90818	0	1.14918e-05	6.0928e-05	139	0.0283307	Q9D0I9	SYRC_MOUSE	Arginine--tRNA ligase, cytoplasmic	Rars	Q9D0I9	Mus musculus	arginyl-tRNA aminoacylation	tRNA binding,arginine-tRNA ligase activity,ATP binding,arginine binding,cadherin binding	nucleus,nucleoplasm,cytoplasm,mitochondrion,cytosol,membrane,aminoacyl-tRNA synthetase multienzyme complex,extracellular exosome	sp	1	2	uniprot_mouse_proteome	>sp|Q9D0I9|SYRC_MOUSE Arginine--tRNA ligase, cytoplasmic OS=Mus musculus GN=Rars PE=1 SV=2	27	28
TRUE	Old_Native / Young_Native	Old_Native	Young_Native	70	O08663;Q3UI33	764289	528054	-0.533434	0.533434	-30.9092	0.690908	0	1.1475e-05	6.0928e-05	69	0.104925	O08663;Q3UI33	MAP2_MOUSE;Q3UI33_MOUSE	Methionine aminopeptidase 2	Metap2	O08663;Q3UI33	Mus musculus	protein processing,peptidyl-methionine modification,N-terminal protein amino acid modification;	RNA binding,aminopeptidase activity,protein binding,metalloexopeptidase activity,metal ion binding;	cytoplasm,cytosol,plasma membrane;	sp;tr	1	1	uniprot_mouse_proteome	>sp|O08663|MAP2_MOUSE Methionine aminopeptidase 2 OS=Mus musculus GN=Metap2 PE=1 SV=1;>tr|Q3UI33|Q3UI33_MOUSE Methionine aminopeptidase 2 OS=Mus musculus GN=Metap2 PE=1 SV=1	12	14
TRUE	Old_Native / Young_Native	Old_Native	Young_Native	160	Q8BIJ6	1.69951e+06	1.98697e+06	0.225449	0.225449	16.9141	1.16914	0	1.17188e-05	6.19858e-05	159	0.0570622	Q8BIJ6	SYIM_MOUSE	Isoleucine--tRNA ligase, mitochondrial	Iars2	Q8BIJ6	Mus musculus	isoleucyl-tRNA aminoacylation,regulation of translational fidelity	tRNA binding,aminoacyl-tRNA editing activity,isoleucine-tRNA ligase activity,ATP binding	mitochondrion,mitochondrial matrix,cytosol	sp	1	1	uniprot_mouse_proteome	>sp|Q8BIJ6|SYIM_MOUSE Isoleucine--tRNA ligase, mitochondrial OS=Mus musculus GN=Iars2 PE=1 SV=1	25	32
TRUE	Old_Native / Young_Native	Old_Native	Young_Native	25	E9QAF9;Q0VGY8	125909	81499.8	-0.627512	0.627512	-35.2708	0.647292	0	1.20895e-05	6.3796e-05	24	0.131343	E9QAF9;Q0VGY8	E9QAF9_MOUSE;TANC1_MOUSE	Protein TANC1	Tanc1	E9QAF9;Q0VGY8	Mus musculus	;myoblast fusion,visual learning,dendritic spine maintenance	;molecular_function	;postsynaptic density,cell junction,dendrite,neuronal cell body,axon terminus,postsynaptic membrane	tr;sp	1	1;2	uniprot_mouse_proteome	>tr|E9QAF9|E9QAF9_MOUSE Protein TANC1 OS=Mus musculus GN=Tanc1 PE=1 SV=1;>sp|Q0VGY8|TANC1_MOUSE Protein TANC1 OS=Mus musculus GN=Tanc1 PE=1 SV=2	5	5
TRUE	Old_Native / Young_Native	Old_Native	Young_Native	15	P01644;P01645	155464	403076	1.37448	1.37448	159.274	2.59274	0	1.27332e-05	6.70355e-05	14	0.207954	P01644;P01645	KV5AB_MOUSE;KV5AC_MOUSE	Ig kappa chain V-V region HP R16.7;Ig kappa chain V-V region HP 93G7	NaN	P01644;P01645	Mus musculus	;	antigen binding;antigen binding	;	sp	1	1	uniprot_mouse_proteome	>sp|P01644|KV5AB_MOUSE Ig kappa chain V-V region HP R16.7 OS=Mus musculus PE=1 SV=1;>sp|P01645|KV5AC_MOUSE Ig kappa chain V-V region HP 93G7 OS=Mus musculus PE=1 SV=1	3	3
TRUE	Old_Native / Young_Native	Old_Native	Young_Native	60	Q3TL44	247220	295995	0.259782	0.259782	19.7298	1.1973	0	1.27778e-05	6.71104e-05	59	0.106582	Q3TL44	NLRX1_MOUSE	NLR family member X1	Nlrx1	Q3TL44	Mus musculus	viral process,negative regulation of interferon-beta production,negative regulation of interleukin-6 production,negative regulation of RIG-I signaling pathway,negative regulation of I-kappaB kinase/NF-kappaB signaling,innate immune response,negative regulation of innate immune response,negative regulation of inflammatory response	protein binding,ATP binding	mitochondrion,mitochondrial outer membrane,plasma membrane,cell junction	sp	1	1	uniprot_mouse_proteome	>sp|Q3TL44|NLRX1_MOUSE NLR family member X1 OS=Mus musculus GN=Nlrx1 PE=1 SV=1	12	12
TRUE	Old_Native / Young_Native	Old_Native	Young_Native	10	A0A075B5M7	10949.5	102569	3.22765	3.22765	836.739	9.36739	0	1.28071e-05	6.71104e-05	9	0.395482	A0A075B5M7	A0A075B5M7_MOUSE	Protein Igkv5-39	Igkv5-39	A0A075B5M7	Mus musculus				tr	1	7	uniprot_mouse_proteome	>tr|A0A075B5M7|A0A075B5M7_MOUSE Protein Igkv5-39 OS=Mus musculus GN=Igkv5-39 PE=1 SV=7	2	2
TRUE	Old_Native / Young_Native	Old_Native	Young_Native	30	Q9D0B6	297782	220790	-0.431577	0.431577	-25.8549	0.741451	0	1.29979e-05	6.79521e-05	29	0.129494	Q9D0B6	PBDC1_MOUSE	Protein PBDC1	Pbdc1	Q9D0B6	Mus musculus	biological_process	molecular_function	cytoplasm	sp	1	1	uniprot_mouse_proteome	>sp|Q9D0B6|PBDC1_MOUSE Protein PBDC1 OS=Mus musculus GN=Pbdc1 PE=1 SV=1	6	6
TRUE	Old_Native / Young_Native	Old_Native	Young_Native	20	P62071	118756	137647	0.212975	0.212975	15.9076	1.15908	0	1.32963e-05	6.93504e-05	19	0.0417357	P62071	RRAS2_MOUSE	Ras-related protein R-Ras2	Rras2	P62071	Mus musculus	osteoblast differentiation,Ras protein signal transduction,cellular process,positive regulation of cell migration,regulation of neuron death	GTPase activity,protein binding,GTP binding	intracellular,plasma membrane,focal adhesion,membrane,extracellular exosome	sp	1	1	uniprot_mouse_proteome	>sp|P62071|RRAS2_MOUSE Ras-related protein R-Ras2 OS=Mus musculus GN=Rras2 PE=1 SV=1	3	4
TRUE	Old_Native / Young_Native	Old_Native	Young_Native	40	Q8BU14	760968	667228	-0.189655	0.189655	-12.3185	0.876815	0	1.35716e-05	7.06228e-05	39	0.0464982	Q8BU14	SEC62_MOUSE	Translocation protein SEC62	Sec62	Q8BU14	Mus musculus	posttranslational protein targeting to membrane	molecular_function,protein transporter activity	endoplasmic reticulum membrane,membrane,integral component of membrane	sp	1	1	uniprot_mouse_proteome	>sp|Q8BU14|SEC62_MOUSE Translocation protein SEC62 OS=Mus musculus GN=Sec62 PE=1 SV=1	6	8
TRUE	Old_Native / Young_Native	Old_Native	Young_Native	10	A0A075B5K8;A0A0B4J1I0;A0A140T8M0;A0A140T8N1;F6XWB2;P01631	117206	444585	1.92341	1.92341	279.319	3.79319	0	1.36785e-05	7.10147e-05	9	0.231561	A0A075B5K8;A0A0B4J1I0;A0A140T8M0;A0A140T8N1;F6XWB2;P01631	A0A075B5K8_MOUSE;A0A0B4J1I0_MOUSE;A0A140T8M0_MOUSE;A0A140T8N1_MOUSE;F6XWB2_MOUSE;KV2A7_MOUSE	Protein Igkv1-99;Protein Igkv1-110 (Fragment);Protein Igkv1-117 (Fragment);Protein Igkv1-88 (Fragment);Protein Igkv1-99 (Fragment);Ig kappa chain V-II region 26-10	Igkv1-99;Igkv1-110;Igkv1-117;Igkv1-88;Igkv1-99;	A0A075B5K8;A0A0B4J1I0;A0A140T8M0;A0A140T8N1;F6XWB2;P01631	Mus musculus	;immunoglobulin production,immune response;;;immunoglobulin production,immune response;	;;;;;antigen binding	;extracellular space;;;extracellular space;	tr;tr;tr;tr;tr;sp	4;4;4;4;4;1	7;5;2;2;5;1	uniprot_mouse_proteome	>tr|A0A075B5K8|A0A075B5K8_MOUSE Protein Igkv1-99 OS=Mus musculus GN=Igkv1-99 PE=4 SV=7;>tr|A0A0B4J1I0|A0A0B4J1I0_MOUSE Protein Igkv1-110 (Fragment) OS=Mus musculus GN=Igkv1-110 PE=4 SV=5;>tr|A0A140T8M0|A0A140T8M0_MOUSE Protein Igkv1-117 (Fragment) OS=Mus musculus GN=Igkv1-117 PE=4 SV=2;>tr|A0A140T8N1|A0A140T8N1_MOUSE Protein Igkv1-88 (Fragment) OS=Mus musculus GN=Igkv1-88 PE=4 SV=2;>tr|F6XWB2|F6X…	2	2
TRUE	Old_Native / Young_Native	Old_Native	Young_Native	40	E9PW66;P28656	1.38923e+06	970826	-0.517	0.517	-30.1176	0.698824	0	1.37622e-05	7.12845e-05	39	0.120849	E9PW66;P28656	E9PW66_MOUSE;NP1L1_MOUSE	Nucleosome assembly protein 1-like 1	Nap1l1	E9PW66;P28656	Mus musculus	;nucleosome assembly	;RNA binding,protein binding	;nucleus,membrane,melanosome	tr;sp	1	1;2	uniprot_mouse_proteome	>tr|E9PW66|E9PW66_MOUSE Nucleosome assembly protein 1-like 1 OS=Mus musculus GN=Nap1l1 PE=1 SV=1;>sp|P28656|NP1L1_MOUSE Nucleosome assembly protein 1-like 1 OS=Mus musculus GN=Nap1l1 PE=1 SV=2	7	8
TRUE	Old_Native / Young_Native	Old_Native	Young_Native	75	Q924C1	375602	312722	-0.264321	0.264321	-16.7409	0.832591	0	1.38153e-05	7.1395e-05	74	0.0763122	Q924C1	XPO5_MOUSE	Exportin-5	Xpo5	Q924C1	Mus musculus	RNA export from nucleus,protein export from nucleus,pre-miRNA export from nucleus,regulation of protein export from nucleus,positive regulation of RNA interference	tRNA binding,RNA binding,mRNA binding,nuclear export signal receptor activity,Ran GTPase binding,protein transporter activity,pre-miRNA binding,pre-miRNA transporter activity	nucleus,nucleoplasm,cytoplasm,cytosol,micro-ribonucleoprotein complex,nuclear RNA export factor complex,RNA nuclear export complex	sp	1	1	uniprot_mouse_proteome	>sp|Q924C1|XPO5_MOUSE Exportin-5 OS=Mus musculus GN=Xpo5 PE=1 SV=1	15	15
TRUE	Old_Native / Young_Native	Old_Native	Young_Native	40	P62900	5472054	4714250	-0.215054	0.215054	-13.8486	0.861514	0	1.39132e-05	7.17362e-05	39	0.0381606	P62900	RL31_MOUSE	60S ribosomal protein L31	Rpl31	P62900	Mus musculus	cytoplasmic translation	RNA binding,structural constituent of ribosome,protein binding	focal adhesion,membrane,cytosolic large ribosomal subunit,extracellular exosome	sp	1	1	uniprot_mouse_proteome	>sp|P62900|RL31_MOUSE 60S ribosomal protein L31 OS=Mus musculus GN=Rpl31 PE=1 SV=1	5	8
TRUE	Old_Native / Young_Native	Old_Native	Young_Native	75	Q6ZWN5	11853729	10183482	-0.21911	0.21911	-14.0905	0.859095	0	1.43873e-05	7.40107e-05	74	0.0403544	Q6ZWN5	RS9_MOUSE	40S ribosomal protein S9	Rps9	Q6ZWN5	Mus musculus	translation,positive regulation of cell proliferation,positive regulation of translational fidelity	RNA binding,structural constituent of ribosome,rRNA binding,translation regulator activity	nucleus,nucleolus,cytoplasm,focal adhesion,membrane,cytosolic small ribosomal subunit,intracellular ribonucleoprotein complex,extracellular exosome	sp	1	3	uniprot_mouse_proteome	>sp|Q6ZWN5|RS9_MOUSE 40S ribosomal protein S9 OS=Mus musculus GN=Rps9 PE=1 SV=3	11	15
TRUE	Old_Native / Young_Native	Old_Native	Young_Native	25	Q9R062	467124	363856	-0.360436	0.360436	-22.1071	0.778929	0	1.47359e-05	7.54583e-05	24	0.0552767	Q9R062	GLYG_MOUSE	Glycogenin-1	Gyg1	Q9R062	Mus musculus	glycogen biosynthetic process	glycogenin glucosyltransferase activity,metal ion binding,Requires Ontology	membrane,extracellular exosome	sp	1	3	uniprot_mouse_proteome	>sp|Q9R062|GLYG_MOUSE Glycogenin-1 OS=Mus musculus GN=Gyg1 PE=1 SV=3	5	5
TRUE	Old_Native / Young_Native	Old_Native	Young_Native	20	A2A7G9;A2A7H1;Q9QZN4;Z4YN00	78163.2	113567	0.538984	0.538984	45.2949	1.45295	0	1.47287e-05	7.54583e-05	19	0.0919444	A2A7G9;A2A7H1;Q9QZN4;Z4YN00	A2A7G9_MOUSE;A2A7H1_MOUSE;FBX6_MOUSE;Z4YN00_MOUSE	F-box only protein 6 (Fragment);F-box only protein 6 (Fragment);F-box only protein 6;F-box only protein 6 (Fragment)	Fbxo6	A2A7G9;A2A7H1;Q9QZN4;Z4YN00	Mus musculus	;;DNA repair,glycoprotein catabolic process,response to unfolded protein,protein ubiquitination,ER-associated ubiquitin-dependent protein catabolic process,SCF-dependent proteasomal ubiquitin-dependent protein catabolic process,glycoprotein ERAD pathway;	;;ubiquitin-protein transferase activity,protein binding,carbohydrate binding,ubiquitin protein ligase activity,ubiquitin protein ligase activity involved in ERAD pathway;	;;cytoplasm,SCF ubiquitin ligase complex,endoplasmic reticulum quality control compartment;	tr;tr;sp;tr	1	1	uniprot_mouse_proteome	>tr|A2A7G9|A2A7G9_MOUSE F-box only protein 6 (Fragment) OS=Mus musculus GN=Fbxo6 PE=1 SV=1;>tr|A2A7H1|A2A7H1_MOUSE F-box only protein 6 (Fragment) OS=Mus musculus GN=Fbxo6 PE=1 SV=1;>sp|Q9QZN4|FBX6_MOUSE F-box only protein 6 OS=Mus musculus GN=Fbxo6 PE=1 SV=1;>tr|Z4YN00|Z4YN00_MOUSE F-box only protein 6 (Fragment) OS=Mus musculus GN=Fbxo6 PE=1 SV=1	4	4
TRUE	Old_Native / Young_Native	Old_Native	Young_Native	45	E9Q0N0;E9Q3I4;E9Q3I5;E9Q3I8;E9Q3I9;Q9Z0R4;Q9Z0R4-2	265404	236669	-0.165321	0.165321	-10.827	0.89173	0	1.48727e-05	7.59858e-05	44	0.0492256	E9Q0N0;E9Q3I4;E9Q3I5;E9Q3I8;E9Q3I9;Q9Z0R4;Q9Z0R4-2	E9Q0N0_MOUSE;E9Q3I4_MOUSE;E9Q3I5_MOUSE;E9Q3I8_MOUSE;E9Q3I9_MOUSE;ITSN1_MOUSE;ITSN1_MOUSE	Intersectin-1;Intersectin-1;Intersectin-1;Intersectin-1;Intersectin-1;Intersectin-1;Isoform 2 of Intersectin-1	Itsn1	E9Q0N0;E9Q3I4;E9Q3I5;E9Q3I8;E9Q3I9;Q9Z0R4;Q9Z0R4-2	Mus musculus	;;;;;endocytosis,small GTPase mediated signal transduction,regulation of Rho protein signal transduction,positive regulation of phosphorylation,negative regulation of neuron apoptotic process,positive regulation of GTPase activity,ephrin receptor signaling pathway,positive regulation of protein kinase B signaling;	;;;;;Rho guanyl-nucleotide exchange factor activity,calcium ion binding,protein binding,kinase activator activity,protein complex scaffold,proline-rich region binding;	;;;;;cytosol,plasma membrane,clathrin-coated pit,lamellipodium,cell junction,endocytic vesicle,neuron projection,synapse;	tr;tr;tr;tr;tr;sp;sp	1;1;1;1;1;1;	1;1;1;1;1;2;	uniprot_mouse_proteome	>tr|E9Q0N0|E9Q0N0_MOUSE Intersectin-1 OS=Mus musculus GN=Itsn1 PE=1 SV=1;>tr|E9Q3I4|E9Q3I4_MOUSE Intersectin-1 OS=Mus musculus GN=Itsn1 PE=1 SV=1;>tr|E9Q3I5|E9Q3I5_MOUSE Intersectin-1 OS=Mus musculus GN=Itsn1 PE=1 SV=1;>tr|E9Q3I8|E9Q3I8_MOUSE Intersectin-1 OS=Mus musculus GN=Itsn1 PE=1 SV=1;>tr|E9Q3I9|E9Q3I9_MOUSE Intersectin-1 OS=Mus musculus GN=Itsn1 PE=1 SV=1;>sp|Q9Z0R4|ITSN1_MOUSE Intersectin…	9	9
TRUE	Old_Native / Young_Native	Old_Native	Young_Native	60	Q61830	515900	520580	0.0130281	0.0130281	0.907129	1.00907	0	1.49224e-05	7.6067e-05	59	0.0732427	Q61830	MRC1_MOUSE	Macrophage mannose receptor 1	Mrc1	Q61830	Mus musculus	receptor-mediated endocytosis,signal transduction,cellular response to lipopolysaccharide,cellular response to interferon-gamma,cellular response to interleukin-4	receptor activity,transmembrane signaling receptor activity,mannose binding	plasma membrane,integral component of plasma membrane,cell surface,endosome membrane	sp	1	2	uniprot_mouse_proteome	>sp|Q61830|MRC1_MOUSE Macrophage mannose receptor 1 OS=Mus musculus GN=Mrc1 PE=1 SV=2	12	12
TRUE	Old_Native / Young_Native	Old_Native	Young_Native	115	Q91VC3	4297661	3.72061e+06	-0.208014	0.208014	-13.4272	0.865728	0	1.50419e-05	7.65025e-05	114	0.0443374	Q91VC3	IF4A3_MOUSE	Eukaryotic initiation factor 4A-III	Eif4a3	Q91VC3	Mus musculus	nuclear-transcribed mRNA catabolic process, nonsense-mediated decay,regulation of alternative mRNA splicing, via spliceosome,rRNA processing,mRNA processing,associative learning,RNA splicing,RNA secondary structure unwinding,response to organic cyclic compound,negative regulation of translation,exploration behavior,positive regulation of translation,positive regulation of transcription from RNA p…	RNA binding,mRNA binding,ATP-dependent RNA helicase activity,ATP binding,poly(A) binding,selenocysteine insertion sequence binding,RNA stem-loop binding,ribonucleoprotein complex binding	nucleus,nucleoplasm,nucleolus,cytoplasm,membrane,nuclear speck,dendrite,exon-exon junction complex,neuronal cell body,catalytic step 2 spliceosome	sp	1	3	uniprot_mouse_proteome	>sp|Q91VC3|IF4A3_MOUSE Eukaryotic initiation factor 4A-III OS=Mus musculus GN=Eif4a3 PE=1 SV=3	20	23
TRUE	Old_Native / Young_Native	Old_Native	Young_Native	25	P30115	302533	523531	0.791182	0.791182	73.0491	1.73049	0	1.51443e-05	7.68498e-05	24	0.136375	P30115	GSTA3_MOUSE	Glutathione S-transferase A3	Gsta3	P30115	Mus musculus	ureteric bud development,glutathione metabolic process,aflatoxin catabolic process	glutathione transferase activity	cytosol,extracellular exosome	sp	1	2	uniprot_mouse_proteome	>sp|P30115|GSTA3_MOUSE Glutathione S-transferase A3 OS=Mus musculus GN=Gsta3 PE=1 SV=2	4	5
TRUE	Old_Native / Young_Native	Old_Native	Young_Native	70	P99029;P99029-2	6319475	7478013	0.24285	0.24285	18.3328	1.18333	0	1.55465e-05	7.87129e-05	69	0.04826	P99029;P99029-2	PRDX5_MOUSE	Peroxiredoxin-5, mitochondrial;Isoform Cytoplasmic+peroxisomal of Peroxiredoxin-5, mitochondrial	Prdx5	P99029;P99029-2	Mus musculus	apoptotic process,response to oxidative stress,negative regulation of transcription from RNA polymerase III promoter,positive regulation of collagen biosynthetic process,cellular response to reactive oxygen species,hydrogen peroxide catabolic process,negative regulation of apoptotic process,negative regulation of cysteine-type endopeptidase activity involved in apoptotic process,cell redox homeos…	RNA polymerase III regulatory region DNA binding,peroxidase activity,receptor binding,thioredoxin peroxidase activity,antioxidant activity,cysteine-type endopeptidase inhibitor activity involved in apoptotic process,protein dimerization activity,peroxiredoxin activity,peroxynitrite reductase activity;	extracellular space,nucleus,cytoplasm,mitochondrion,peroxisome,peroxisomal matrix,cytosol,cytoplasmic vesicle,intracellular membrane-bounded organelle,perinuclear region of cytoplasm,extracellular exosome;	sp	1;	2;	uniprot_mouse_proteome	>sp|P99029|PRDX5_MOUSE Peroxiredoxin-5, mitochondrial OS=Mus musculus GN=Prdx5 PE=1 SV=2;>sp|P99029-2|PRDX5_MOUSE Isoform Cytoplasmic+peroxisomal of Peroxiredoxin-5, mitochondrial OS=Mus musculus GN=Prdx5	11	14
TRUE	Old_Native / Young_Native	Old_Native	Young_Native	30	Q9R013	394678	509913	0.369577	0.369577	29.1974	1.29197	0	1.58474e-05	8.0056e-05	29	0.0710989	Q9R013	CATF_MOUSE	Cathepsin F	Ctsf	Q9R013	Mus musculus	proteolysis involved in cellular protein catabolic process	cysteine-type endopeptidase activity,cysteine-type peptidase activity	extracellular space,lysosome,extracellular exosome,extracellular vesicle	sp	1	1	uniprot_mouse_proteome	>sp|Q9R013|CATF_MOUSE Cathepsin F OS=Mus musculus GN=Ctsf PE=1 SV=1	6	6
TRUE	Old_Native / Young_Native	Old_Native	Young_Native	30	P51661	351243	200098	-0.811763	0.811763	-43.0315	0.569685	0	1.60524e-05	8.07288e-05	29	0.137734	P51661	DHI2_MOUSE	Corticosteroid 11-beta-dehydrogenase isozyme 2	Hsd11b2	P51661	Mus musculus	response to hypoxia,regulation of blood volume by renal aldosterone,female pregnancy,glucocorticoid metabolic process,response to food,response to insulin,response to drug,response to glucocorticoid,oxidation-reduction process	11-beta-hydroxysteroid dehydrogenase [NAD(P)] activity,steroid binding,NAD binding	endoplasmic reticulum	sp	1	2	uniprot_mouse_proteome	>sp|P51661|DHI2_MOUSE Corticosteroid 11-beta-dehydrogenase isozyme 2 OS=Mus musculus GN=Hsd11b2 PE=1 SV=2	6	6
TRUE	Old_Native / Young_Native	Old_Native	Young_Native	35	Q9DBB8	307162	376403	0.293276	0.293276	22.542	1.22542	0	1.6043e-05	8.07288e-05	34	0.0787737	Q9DBB8	DHDH_MOUSE	Trans-1,2-dihydrobenzene-1,2-diol dehydrogenase	Dhdh	Q9DBB8	Mus musculus	D-xylose catabolic process,oxidation-reduction process	trans-1,2-dihydrobenzene-1,2-diol dehydrogenase activity,D-xylose 1-dehydrogenase (NADP+) activity		sp	1	1	uniprot_mouse_proteome	>sp|Q9DBB8|DHDH_MOUSE Trans-1,2-dihydrobenzene-1,2-diol dehydrogenase OS=Mus musculus GN=Dhdh PE=1 SV=1	5	7
TRUE	Old_Native / Young_Native	Old_Native	Young_Native	35	F6ZBR8	67322.1	44509.9	-0.596952	0.596952	-33.8851	0.661149	0	1.60902e-05	8.07384e-05	34	0.185414	F6ZBR8	F6ZBR8_MOUSE	Protein Wiz (Fragment)	Wiz	F6ZBR8	Mus musculus				tr	1	1	uniprot_mouse_proteome	>tr|F6ZBR8|F6ZBR8_MOUSE Protein Wiz (Fragment) OS=Mus musculus GN=Wiz PE=1 SV=1	7	7
TRUE	Old_Native / Young_Native	Old_Native	Young_Native	35	Q91V01	1.17748e+06	1.42242e+06	0.272647	0.272647	20.8022	1.20802	0	1.63545e-05	8.1882e-05	34	0.0658774	Q91V01	MBOA5_MOUSE	Lysophospholipid acyltransferase 5	Lpcat3	Q91V01	Mus musculus	phospholipid biosynthetic process,regulation of plasma lipoprotein particle levels	1-acylglycerophosphocholine O-acyltransferase activity	endoplasmic reticulum membrane,membrane,integral component of membrane	sp	1	1	uniprot_mouse_proteome	>sp|Q91V01|MBOA5_MOUSE Lysophospholipid acyltransferase 5 OS=Mus musculus GN=Lpcat3 PE=1 SV=1	7	7
TRUE	Old_Native / Young_Native	Old_Native	Young_Native	35	O54879	872395	591963	-0.559474	0.559474	-32.1451	0.678549	0	1.6422e-05	8.20373e-05	34	0.107074	O54879	HMGB3_MOUSE	High mobility group protein B3	Hmgb3	O54879	Mus musculus	transcription, DNA-templated,regulation of transcription, DNA-templated,DNA geometric change,innate immune response,negative regulation of B cell differentiation,negative regulation of myeloid cell differentiation	four-way junction DNA binding,DNA binding,RNA binding,DNA binding, bending	nucleus,chromosome,cytoplasm	sp	1	3	uniprot_mouse_proteome	>sp|O54879|HMGB3_MOUSE High mobility group protein B3 OS=Mus musculus GN=Hmgb3 PE=1 SV=3	6	7
TRUE	Old_Native / Young_Native	Old_Native	Young_Native	45	P54276	251097	177510	-0.500348	0.500348	-29.3064	0.706936	0	1.64918e-05	8.2203e-05	44	0.105729	P54276	MSH6_MOUSE	DNA mismatch repair protein Msh6	Msh6	P54276	Mus musculus	DNA repair,mismatch repair,determination of adult lifespan,intrinsic apoptotic signaling pathway in response to DNA damage,response to UV,somatic hypermutation of immunoglobulin genes,somatic recombination of immunoglobulin gene segments,maintenance of DNA repeat elements,isotype switching,positive regulation of isotype switching,negative regulation of DNA recombination,positive regulation of hel…	four-way junction DNA binding,DNA binding,chromatin binding,damaged DNA binding,DNA-dependent ATPase activity,mismatched DNA binding,guanine/thymine mispair binding,single base insertion or deletion binding,methylated histone binding,magnesium ion binding,double-stranded DNA binding,ATP binding,ATPase activity,single guanine insertion binding,single thymine insertion binding,oxidized purine DNA b…	nuclear chromatin,nucleoplasm,Golgi apparatus,cytosol,MutSalpha complex,intracellular membrane-bounded organelle	sp	1	3	uniprot_mouse_proteome	>sp|P54276|MSH6_MOUSE DNA mismatch repair protein Msh6 OS=Mus musculus GN=Msh6 PE=1 SV=3	9	9
TRUE	Old_Native / Young_Native	Old_Native	Young_Native	85	Q9DAW9	3.06188e+06	2.63757e+06	-0.215211	0.215211	-13.858	0.86142	0	1.7113e-05	8.51106e-05	84	0.0895912	Q9DAW9	CNN3_MOUSE	Calponin-3	Cnn3	Q9DAW9	Mus musculus	epithelial cell differentiation,actomyosin structure organization,negative regulation of ATPase activity,cell-cell adhesion	actin binding,protein binding,calmodulin binding,microtubule binding,cadherin binding involved in cell-cell adhesion	cytosol,cell-cell adherens junction,focal adhesion,postsynaptic density,actin cytoskeleton,neuronal cell body,dendritic spine	sp	1	1	uniprot_mouse_proteome	>sp|Q9DAW9|CNN3_MOUSE Calponin-3 OS=Mus musculus GN=Cnn3 PE=1 SV=1	12	17
TRUE	Old_Native / Young_Native	Old_Native	Young_Native	55	Q8BH97	705227	569303	-0.308892	0.308892	-19.2738	0.807262	0	1.77008e-05	8.76465e-05	54	0.0645457	Q8BH97	RCN3_MOUSE	Reticulocalbin-3	Rcn3	Q8BH97	Mus musculus	biological_process	calcium ion binding	endoplasmic reticulum lumen	sp	1	1	uniprot_mouse_proteome	>sp|Q8BH97|RCN3_MOUSE Reticulocalbin-3 OS=Mus musculus GN=Rcn3 PE=1 SV=1	9	11
TRUE	Old_Native / Young_Native	Old_Native	Young_Native	30	Q6P8I4	530117	450550	-0.234626	0.234626	-15.0095	0.849905	0	1.76853e-05	8.76465e-05	29	0.0611745	Q6P8I4	PCNP_MOUSE	PEST proteolytic signal-containing nuclear protein	Pcnp	Q6P8I4	Mus musculus	cell cycle,protein ubiquitination,proteasome-mediated ubiquitin-dependent protein catabolic process		nucleus,nuclear body	sp	1	1	uniprot_mouse_proteome	>sp|Q6P8I4|PCNP_MOUSE PEST proteolytic signal-containing nuclear protein OS=Mus musculus GN=Pcnp PE=1 SV=1	5	6
TRUE	Old_Native / Young_Native	Old_Native	Young_Native	50	Q5SWT3	682466	558499	-0.289201	0.289201	-18.1645	0.818355	0	1.79479e-05	8.86745e-05	49	0.0827106	Q5SWT3	S2535_MOUSE	Solute carrier family 25 member 35	Slc25a35	Q5SWT3	Mus musculus	mitochondrial transport,transmembrane transport	transmembrane transporter activity	mitochondrion,mitochondrial inner membrane,integral component of membrane	sp	1	2	uniprot_mouse_proteome	>sp|Q5SWT3|S2535_MOUSE Solute carrier family 25 member 35 OS=Mus musculus GN=Slc25a35 PE=1 SV=2	10	10
TRUE	Old_Native / Young_Native	Old_Native	Young_Native	50	Q9Z1D1	1.14928e+06	996546	-0.205718	0.205718	-13.2893	0.867107	0	1.83244e-05	9.03361e-05	49	0.0684943	Q9Z1D1	EIF3G_MOUSE	Eukaryotic translation initiation factor 3 subunit G	Eif3g	Q9Z1D1	Mus musculus	translational initiation,viral translational termination-reinitiation	RNA binding,protein binding,translation initiation factor activity	nucleus,cytoplasm,cytosol,eukaryotic translation initiation factor 3 complex,perinuclear region of cytoplasm	sp	1	2	uniprot_mouse_proteome	>sp|Q9Z1D1|EIF3G_MOUSE Eukaryotic translation initiation factor 3 subunit G OS=Mus musculus GN=Eif3g PE=1 SV=2	10	10
TRUE	Old_Native / Young_Native	Old_Native	Young_Native	55	Q60770	342420	399075	0.220892	0.220892	16.5454	1.16545	0	1.86194e-05	9.15897e-05	54	0.05188	Q60770	STXB3_MOUSE	Syntaxin-binding protein 3	Stxbp3	Q60770	Mus musculus	exocytosis,vesicle docking involved in exocytosis,brain development,glucose transport,protein to membrane docking,insulin secretion,response to insulin,neutrophil degranulation,negative regulation of calcium ion-dependent exocytosis,protein heterooligomerization,membrane organization,platelet aggregation	protein binding,syntaxin-1 binding,syntaxin binding	cytosol,plasma membrane,basolateral plasma membrane,apical plasma membrane,platelet alpha granule,specific granule,extracellular exosome,tertiary granule	sp	1	1	uniprot_mouse_proteome	>sp|Q60770|STXB3_MOUSE Syntaxin-binding protein 3 OS=Mus musculus GN=Stxbp3 PE=1 SV=1	11	11
TRUE	Old_Native / Young_Native	Old_Native	Young_Native	40	Q9JKX6	591796	445037	-0.411174	0.411174	-24.7989	0.752011	0	1.93842e-05	9.51434e-05	39	0.11023	Q9JKX6	NUDT5_MOUSE	ADP-sugar pyrophosphatase	Nudt5	Q9JKX6	Mus musculus	nucleobase-containing compound metabolic process,chromatin remodeling,ribonucleoside diphosphate catabolic process,D-ribose catabolic process,ATP generation from poly-ADP-D-ribose	magnesium ion binding,nucleotidyltransferase activity,nucleoside-diphosphatase activity,ADP-sugar diphosphatase activity,snoRNA binding,protein homodimerization activity,8-oxo-dGDP phosphatase activity,ADP-ribose diphosphatase activity,m7G(5')pppN diphosphatase activity	nucleus,extracellular exosome	sp	1	1	uniprot_mouse_proteome	>sp|Q9JKX6|NUDT5_MOUSE ADP-sugar pyrophosphatase OS=Mus musculus GN=Nudt5 PE=1 SV=1	7	8
TRUE	Old_Native / Young_Native	Old_Native	Young_Native	40	O35114	474111	625128	0.398928	0.398928	31.8528	1.31853	0	1.94388e-05	9.52033e-05	39	0.0945056	O35114	SCRB2_MOUSE	Lysosome membrane protein 2	Scarb2	O35114	Mus musculus	protein targeting to lysosome,positive regulation of neuron projection development,regulation of glucosylceramidase activity	receptor activity,enzyme binding	lysosomal membrane,focal adhesion,membrane,integral component of membrane,lysosomal lumen,extracellular exosome	sp	1	3	uniprot_mouse_proteome	>sp|O35114|SCRB2_MOUSE Lysosome membrane protein 2 OS=Mus musculus GN=Scarb2 PE=1 SV=3	7	8
TRUE	Old_Native / Young_Native	Old_Native	Young_Native	220	Q64511	1.03482e+06	926548	-0.159441	0.159441	-10.4628	0.895372	0	1.97804e-05	9.66657e-05	219	0.0508193	Q64511	TOP2B_MOUSE	DNA topoisomerase 2-beta	Top2b	Q64511	Mus musculus	resolution of meiotic recombination intermediates,sister chromatid segregation,neuron migration,DNA topological change,axonogenesis,forebrain development,mitotic DNA integrity checkpoint	DNA binding,chromatin binding,DNA topoisomerase activity,DNA topoisomerase type II (ATP-hydrolyzing) activity,protein kinase C binding,protein binding,ATP binding,protein C-terminus binding,enzyme binding,histone deacetylase binding,ribonucleoprotein complex binding,metal ion binding,protein heterodimerization activity	nucleus,nucleoplasm,nucleolus,cytosol,intracellular ribonucleoprotein complex,chromosome,heterochromatin	sp	1	2	uniprot_mouse_proteome	>sp|Q64511|TOP2B_MOUSE DNA topoisomerase 2-beta OS=Mus musculus GN=Top2b PE=1 SV=2	41	44
TRUE	Old_Native / Young_Native	Old_Native	Young_Native	15	F8WGB3;Q9CZB0	406448	526842	0.3743	0.3743	29.6211	1.29621	0	1.99932e-05	9.74938e-05	14	0.0580752	F8WGB3;Q9CZB0	F8WGB3_MOUSE;C560_MOUSE	Succinate dehydrogenase cytochrome b560 subunit, mitochondrial;Succinate dehydrogenase cytochrome b560 subunit, mitochondrial	Sdhc	F8WGB3;Q9CZB0	Mus musculus	;tricarboxylic acid cycle,mitochondrial electron transport, succinate to ubiquinone	;succinate dehydrogenase activity,electron carrier activity,heme binding,metal ion binding	;mitochondrion,mitochondrial inner membrane,mitochondrial respiratory chain complex II, succinate dehydrogenase complex (ubiquinone),integral component of membrane	tr;sp	1	1	uniprot_mouse_proteome	>tr|F8WGB3|F8WGB3_MOUSE Succinate dehydrogenase cytochrome b560 subunit, mitochondrial OS=Mus musculus GN=Sdhc PE=1 SV=1;>sp|Q9CZB0|C560_MOUSE Succinate dehydrogenase cytochrome b560 subunit, mitochondrial OS=Mus musculus GN=Sdhc PE=1 SV=1	3	3
TRUE	Old_Native / Young_Native	Old_Native	Young_Native	25	Q61735-2	227401	319881	0.492297	0.492297	40.6682	1.40668	0	2.02755e-05	9.86564e-05	24	0.0814669	Q61735-2	CD47_MOUSE	Isoform 2 of Leukocyte surface antigen CD47	Cd47	Q61735-2	Mus musculus				sp			uniprot_mouse_proteome	>sp|Q61735-2|CD47_MOUSE Isoform 2 of Leukocyte surface antigen CD47 OS=Mus musculus GN=Cd47	5	5
TRUE	Old_Native / Young_Native	Old_Native	Young_Native	45	Q8VCR7	1.32731e+06	1.81777e+06	0.453671	0.453671	36.952	1.36952	0	2.05538e-05	9.97948e-05	44	0.127903	Q8VCR7	ABHEB_MOUSE	Protein ABHD14B	Abhd14b	Q8VCR7	Mus musculus	positive regulation of transcription from RNA polymerase II promoter	hydrolase activity	nucleus,nucleolus,cytoplasm,cytosol,extracellular exosome	sp	1	1	uniprot_mouse_proteome	>sp|Q8VCR7|ABHEB_MOUSE Protein ABHD14B OS=Mus musculus GN=Abhd14b PE=1 SV=1	7	9
TRUE	Old_Native / Young_Native	Old_Native	Young_Native	140	A2AL12;Q8BG05	19590144	18417070	-0.0890844	0.0890844	-5.98808	0.940119	0	2.0871e-05	0.000101116	139	0.0502194	A2AL12;Q8BG05	A2AL12_MOUSE;ROA3_MOUSE	Heterogeneous nuclear ribonucleoprotein A3	Hnrnpa3	A2AL12;Q8BG05	Mus musculus	;mRNA processing,RNA splicing	;RNA binding	;spliceosomal complex	tr;sp	1	1	uniprot_mouse_proteome	>tr|A2AL12|A2AL12_MOUSE Heterogeneous nuclear ribonucleoprotein A3 OS=Mus musculus GN=Hnrnpa3 PE=1 SV=1;>sp|Q8BG05|ROA3_MOUSE Heterogeneous nuclear ribonucleoprotein A3 OS=Mus musculus GN=Hnrnpa3 PE=1 SV=1	16	28
TRUE	Old_Native / Young_Native	Old_Native	Young_Native	70	Q6NZD2;Q9WV80	1.00798e+06	1.10345e+06	0.130554	0.130554	9.47143	1.09471	0	2.10129e-05	0.000101367	69	0.0282845	Q6NZD2;Q9WV80	Q6NZD2_MOUSE;SNX1_MOUSE	Sorting nexin 1;Sorting nexin-1	Snx1	Q6NZD2;Q9WV80	Mus musculus	;intracellular protein transport,endocytosis,vesicle organization,negative regulation of transforming growth factor beta receptor signaling pathway,neuron projection development,receptor internalization,early endosome to Golgi transport,retrograde transport, endosome to Golgi,lamellipodium morphogenesis	;epidermal growth factor receptor binding,insulin receptor binding,protein binding,phosphatidylinositol binding,identical protein binding,protein homodimerization activity,cadherin binding,protein heterodimerization activity,transferrin receptor binding,leptin receptor binding	;cytoplasm,lysosome,endosome,Golgi apparatus,cytosol,endosome membrane,postsynaptic density,membrane,extrinsic component of membrane,lamellipodium,retromer complex,retromer, tubulation complex,early endosome membrane,vesicle,dendritic spine,intracellular membrane-bounded organelle,protein complex,presynapse	tr;sp	1	1	uniprot_mouse_proteome	>tr|Q6NZD2|Q6NZD2_MOUSE Sorting nexin 1 OS=Mus musculus GN=Snx1 PE=1 SV=1;>sp|Q9WV80|SNX1_MOUSE Sorting nexin-1 OS=Mus musculus GN=Snx1 PE=1 SV=1	14	14
TRUE	Old_Native / Young_Native	Old_Native	Young_Native	20	D6RHA2;P82343;P82343-2	218319	278411	0.350781	0.350781	27.525	1.27525	0	2.09775e-05	0.000101367	19	0.0723136	D6RHA2;P82343;P82343-2	D6RHA2_MOUSE;RENBP_MOUSE;RENBP_MOUSE	N-acylglucosamine 2-epimerase;N-acylglucosamine 2-epimerase;Isoform 2 of N-acylglucosamine 2-epimerase	Renbp	D6RHA2;P82343;P82343-2	Mus musculus	;N-acetylglucosamine metabolic process,N-acetylmannosamine metabolic process,negative regulation of endopeptidase activity,N-acetylneuraminate catabolic process;	;endopeptidase inhibitor activity,ATP binding,protein homodimerization activity,N-acylglucosamine 2-epimerase activity;	;extracellular exosome;	tr;sp;sp	1;1;	2;3;	uniprot_mouse_proteome	>tr|D6RHA2|D6RHA2_MOUSE N-acylglucosamine 2-epimerase OS=Mus musculus GN=Renbp PE=1 SV=2;>sp|P82343|RENBP_MOUSE N-acylglucosamine 2-epimerase OS=Mus musculus GN=Renbp PE=1 SV=3;>sp|P82343-2|RENBP_MOUSE Isoform 2 of N-acylglucosamine 2-epimerase OS=Mus musculus GN=Renbp	4	4
[truncated: 3,618 more rows]
