# Supplementary material for: Proteomic quantification of native and ECM-enriched mouse ovaries reveals an age-dependent fibro-inflammatory signature
Source: Aging (Albany NY). 2023 Oct 27;15(20):10821–55. doi: 10.18632/aging.205190 (PMC10637783; doi:10.18632/aging.205190)
Supplement: Supplementary Table 2 [file aging-15-205190-s003.xlsx]

## Sheet: ECM-Enr Protein Identifications
Supplementary Table 2. All protein identifications in ECM-enriched mouse ovaries.
Young and Old ECM-Enriched Mouse Ovaries			3160 total proteins with 2 peptide minimum
all proteins - all conditions - significant and not significant
Valid	Comparison (group1/group2)	Condition Numerator	Condition Denominator	# of Ratios	Group	AVG Group Quantity Denominator	AVG Group Quantity Numerator	AVG Log2 Ratio	Absolute AVG Log2 Ratio	% Change	Ratio	Standard Deviation	Pvalue	Qvalue	Degrees Of Freedom	Standard Error	ProteinGroups	ProteinNames	ProteinDescriptions	Genes	UniProtIds	Organisms	GO Biological Process	GO Molecular Function	GO Cellular Component	Database	Protein Existence	Sequence Version	FASTAName	FASTAHeader	# Unique Total Peptides	# Unique Total EG.Id
TRUE	Old_Decellularized / Young_Decellularized	Old_Decellularized	Young_Decellularized	20	A0A0G2JDW7;Q6ZWU9	2.38146e+06	1.64427e+06	-0.5344	0.5344	-30.9554	0.690446	0	7.4269e-07	3.33043e-06	19	0.0839092	A0A0G2JDW7;Q6ZWU9	A0A0G2JDW7_MOUSE;RS27_MOUSE	40S ribosomal protein S27 (Fragment);40S ribosomal protein S27	Rps27	A0A0G2JDW7;Q6ZWU9	Mus musculus	;ribosomal small subunit assembly,rRNA processing,translation	;structural constituent of ribosome,protein binding,metal ion binding	;cytosolic small ribosomal subunit	tr;sp	1	1;3	uniprot_mouse_proteome	>tr|A0A0G2JDW7|A0A0G2JDW7_MOUSE 40S ribosomal protein S27 (Fragment) OS=Mus musculus GN=Rps27 PE=1 SV=1;>sp|Q6ZWU9|RS27_MOUSE 40S ribosomal protein S27 OS=Mus musculus GN=Rps27 PE=1 SV=3	2	4
TRUE	Old_Decellularized / Young_Decellularized	Old_Decellularized	Young_Decellularized	10	A2AI52;Q80U87	45065.9	40136.2	-0.167134	0.167134	-10.939	0.89061	0	0.497597	0.222646	9	0.148632	A2AI52;Q80U87	A2AI52_MOUSE;UBP8_MOUSE	Ubiquitin carboxyl-terminal hydrolase 8	Usp8	A2AI52;Q80U87	Mus musculus	;mitotic cytokinesis,ubiquitin-dependent protein catabolic process,endosome organization,Ras protein signal transduction,protein deubiquitination,protein K63-linked deubiquitination,protein K48-linked deubiquitination	;thiol-dependent ubiquitin-specific protease activity,protein binding,SH3 domain binding,cadherin binding	;intracellular,nucleus,cytoplasm,early endosome,cytosol,extrinsic component of plasma membrane,midbody,extrinsic component of endosome membrane,acrosomal vesicle	tr;sp	1	1;2	uniprot_mouse_proteome	>tr|A2AI52|A2AI52_MOUSE Ubiquitin carboxyl-terminal hydrolase 8 OS=Mus musculus GN=Usp8 PE=1 SV=1;>sp|Q80U87|UBP8_MOUSE Ubiquitin carboxyl-terminal hydrolase 8 OS=Mus musculus GN=Usp8 PE=1 SV=2	2	2
TRUE	Old_Decellularized / Young_Decellularized	Old_Decellularized	Young_Decellularized	10	B1ATV0;Q9WVD4	142867	121758	-0.230653	0.230653	-14.7751	0.852249	0	0.0703147	0.0509639	9	0.095459	B1ATV0;Q9WVD4	B1ATV0_MOUSE;CLCN5_MOUSE	Chloride channel protein;H(+)/Cl(-) exchange transporter 5	Clcn5	B1ATV0;Q9WVD4	Mus musculus	;chloride transport,endocytosis,chloride transmembrane transport,regulation of anion transmembrane transport	;voltage-gated chloride channel activity,chloride channel activity,ATP binding,antiporter activity	;Golgi membrane,lysosomal membrane,endosome,Golgi apparatus,cytosol,plasma membrane,integral component of plasma membrane,endosome membrane,membrane,apical part of cell	tr;sp	1	1	uniprot_mouse_proteome	>tr|B1ATV0|B1ATV0_MOUSE Chloride channel protein OS=Mus musculus GN=Clcn5 PE=1 SV=1;>sp|Q9WVD4|CLCN5_MOUSE H(+)/Cl(-) exchange transporter 5 OS=Mus musculus GN=Clcn5 PE=1 SV=1	2	2
TRUE	Old_Decellularized / Young_Decellularized	Old_Decellularized	Young_Decellularized	10	O09172	2.78475e+06	2.11117e+06	-0.399507	0.399507	-24.1883	0.758117	0	8.94047e-05	0.000218681	9	0.0627738	O09172	GSH0_MOUSE	Glutamate--cysteine ligase regulatory subunit	Gclm	O09172	Mus musculus	cysteine metabolic process,glutamate metabolic process,glutathione metabolic process,glutathione biosynthetic process,response to oxidative stress,aging,response to nutrient,apoptotic mitochondrial changes,response to activity,positive regulation of glutamate-cysteine ligase activity,cellular response to hepatocyte growth factor stimulus,hepatic stellate cell activation,response to drug,negative …	enzyme regulator activity,glutamate-cysteine ligase catalytic subunit binding,protein heterodimerization activity,glutamate-cysteine ligase activity	glutamate-cysteine ligase complex	sp	1	1	uniprot_mouse_proteome	>sp|O09172|GSH0_MOUSE Glutamate--cysteine ligase regulatory subunit OS=Mus musculus GN=Gclm PE=1 SV=1	2	2
TRUE	Old_Decellularized / Young_Decellularized	Old_Decellularized	Young_Decellularized	30	P15864	27903402	18563444	-0.587977	0.587977	-33.4725	0.665275	0	3.11725e-05	8.81985e-05	29	0.119368	P15864	H12_MOUSE	Histone H1.2	Hist1h1c	P15864	Mus musculus	negative regulation of transcription from RNA polymerase II promoter,nucleosome assembly,regulation of transcription from RNA polymerase II promoter,nucleosome positioning,histone H3-K4 trimethylation,histone H3-K27 trimethylation	DNA binding,RNA binding,protein binding,chromatin DNA binding	nucleosome,nucleus,nuclear euchromatin,transcriptionally active chromatin	sp	1	2	uniprot_mouse_proteome	>sp|P15864|H12_MOUSE Histone H1.2 OS=Mus musculus GN=Hist1h1c PE=1 SV=2	2	6
TRUE	Old_Decellularized / Young_Decellularized	Old_Decellularized	Young_Decellularized	10	Q5ND35;Q61247	20115.4	19597.2	-0.0376539	0.0376539	-2.5762	0.974238	0	0.682006	0.279626	9	0.186563	Q5ND35;Q61247	Q5ND35_MOUSE;A2AP_MOUSE	Alpha-2-antiplasmin (Fragment);Alpha-2-antiplasmin	Serpinf2	Q5ND35;Q61247	Mus musculus	;regulation of blood vessel size by renin-angiotensin,acute-phase response,response to organic substance,negative regulation of plasminogen activation,negative regulation of endopeptidase activity,collagen fibril organization,positive regulation of collagen biosynthetic process,positive regulation of cell differentiation,positive regulation of transcription from RNA polymerase II promoter,positiv…	;protease binding,serine-type endopeptidase inhibitor activity,protein homodimerization activity	;fibrinogen complex,extracellular space,cell surface,extracellular exosome,blood microparticle	tr;sp	1	1	uniprot_mouse_proteome	>tr|Q5ND35|Q5ND35_MOUSE Alpha-2-antiplasmin (Fragment) OS=Mus musculus GN=Serpinf2 PE=1 SV=1;>sp|Q61247|A2AP_MOUSE Alpha-2-antiplasmin OS=Mus musculus GN=Serpinf2 PE=1 SV=1	2	2
TRUE	Old_Decellularized / Young_Decellularized	Old_Decellularized	Young_Decellularized	15	Q8C181;Q8C181-2;Q8C181-3;Q8C181-4	378209	343952	-0.136976	0.136976	-9.05768	0.909423	0	0.927412	0.346928	14	0.412775	Q8C181;Q8C181-2;Q8C181-3;Q8C181-4	MBNL2_MOUSE	Muscleblind-like protein 2;Isoform 2 of Muscleblind-like protein 2;Isoform 3 of Muscleblind-like protein 2;Isoform 4 of Muscleblind-like protein 2	Mbnl2	Q8C181;Q8C181-2;Q8C181-3;Q8C181-4	Mus musculus	regulation of alternative mRNA splicing, via spliceosome,mRNA processing,RNA splicing,regulation of RNA splicing;;;	RNA binding,metal ion binding;;;	nucleoplasm,cytoplasm;;;	sp	2;;;	2;;;	uniprot_mouse_proteome	>sp|Q8C181|MBNL2_MOUSE Muscleblind-like protein 2 OS=Mus musculus GN=Mbnl2 PE=2 SV=2;>sp|Q8C181-2|MBNL2_MOUSE Isoform 2 of Muscleblind-like protein 2 OS=Mus musculus GN=Mbnl2;>sp|Q8C181-3|MBNL2_MOUSE Isoform 3 of Muscleblind-like protein 2 OS=Mus musculus GN=Mbnl2;>sp|Q8C181-4|MBNL2_MOUSE Isoform 4 of Muscleblind-like protein 2 OS=Mus musculus GN=Mbnl2	2	3
TRUE	Old_Decellularized / Young_Decellularized	Old_Decellularized	Young_Decellularized	10	Q8CGA3	18903.8	29756.4	0.654526	0.654526	57.4099	1.5741	0	0.0262805	0.0239157	9	0.288597	Q8CGA3	LAT4_MOUSE	Large neutral amino acids transporter small subunit 4	Slc43a2	Q8CGA3	Mus musculus	neutral amino acid transport,L-amino acid transport,L-alpha-amino acid transmembrane transport	neutral amino acid transmembrane transporter activity,L-amino acid transmembrane transporter activity	plasma membrane,integral component of plasma membrane	sp	1	1	uniprot_mouse_proteome	>sp|Q8CGA3|LAT4_MOUSE Large neutral amino acids transporter small subunit 4 OS=Mus musculus GN=Slc43a2 PE=1 SV=1	2	2
TRUE	Old_Decellularized / Young_Decellularized	Old_Decellularized	Young_Decellularized	15	Q9EQQ2	325926	310460	-0.0701362	0.0701362	-4.7452	0.952548	0	0.208461	0.115641	14	0.15816	Q9EQQ2	YIPF5_MOUSE	Protein YIPF5	Yipf5	Q9EQQ2	Mus musculus	protein transport,vesicle-mediated transport,regulation of ER to Golgi vesicle-mediated transport	molecular_function	nucleoplasm,endoplasmic reticulum,endoplasmic reticulum membrane,Golgi apparatus,integral component of membrane,ER to Golgi transport vesicle,Golgi cisterna membrane,nuclear outer membrane-endoplasmic reticulum membrane network,intracellular membrane-bounded organelle,endoplasmic reticulum exit site	sp	1	1	uniprot_mouse_proteome	>sp|Q9EQQ2|YIPF5_MOUSE Protein YIPF5 OS=Mus musculus GN=Yipf5 PE=1 SV=1	2	3
TRUE	Old_Decellularized / Young_Decellularized	Old_Decellularized	Young_Decellularized	15	Q9JJW0	128435	86841.1	-0.564593	0.564593	-32.3854	0.676146	0	0.0632579	0.0470557	14	0.329567	Q9JJW0	PXMP4_MOUSE	Peroxisomal membrane protein 4	Pxmp4	Q9JJW0	Mus musculus	biological_process	molecular_function	peroxisome,peroxisomal membrane,integral component of membrane	sp	1	3	uniprot_mouse_proteome	>sp|Q9JJW0|PXMP4_MOUSE Peroxisomal membrane protein 4 OS=Mus musculus GN=Pxmp4 PE=1 SV=3	2	3
TRUE	Old_Decellularized / Young_Decellularized	Old_Decellularized	Young_Decellularized	10	A0A075B5K8;A0A0B4J1I0;A0A140T8M0;A0A140T8N1;F6XWB2;P01631	48832.6	188082	1.94545	1.94545	285.157	3.85157	0	0.000760088	0.00137201	9	0.373595	A0A075B5K8;A0A0B4J1I0;A0A140T8M0;A0A140T8N1;F6XWB2;P01631	A0A075B5K8_MOUSE;A0A0B4J1I0_MOUSE;A0A140T8M0_MOUSE;A0A140T8N1_MOUSE;F6XWB2_MOUSE;KV2A7_MOUSE	Protein Igkv1-99;Protein Igkv1-110 (Fragment);Protein Igkv1-117 (Fragment);Protein Igkv1-88 (Fragment);Protein Igkv1-99 (Fragment);Ig kappa chain V-II region 26-10	Igkv1-99;Igkv1-110;Igkv1-117;Igkv1-88;Igkv1-99;	A0A075B5K8;A0A0B4J1I0;A0A140T8M0;A0A140T8N1;F6XWB2;P01631	Mus musculus	;immunoglobulin production,immune response;;;immunoglobulin production,immune response;	;;;;;antigen binding	;extracellular space;;;extracellular space;	tr;tr;tr;tr;tr;sp	4;4;4;4;4;1	7;5;2;2;5;1	uniprot_mouse_proteome	>tr|A0A075B5K8|A0A075B5K8_MOUSE Protein Igkv1-99 OS=Mus musculus GN=Igkv1-99 PE=4 SV=7;>tr|A0A0B4J1I0|A0A0B4J1I0_MOUSE Protein Igkv1-110 (Fragment) OS=Mus musculus GN=Igkv1-110 PE=4 SV=5;>tr|A0A140T8M0|A0A140T8M0_MOUSE Protein Igkv1-117 (Fragment) OS=Mus musculus GN=Igkv1-117 PE=4 SV=2;>tr|A0A140T8N1|A0A140T8N1_MOUSE Protein Igkv1-88 (Fragment) OS=Mus musculus GN=Igkv1-88 PE=4 SV=2;>tr|F6XWB2|F6X…	2	2
TRUE	Old_Decellularized / Young_Decellularized	Old_Decellularized	Young_Decellularized	10	A8Y5I3;E9PUJ2;P70388;P70388-2;P70388-4;Q5SV02	45581.8	40464.6	-0.171796	0.171796	-11.2263	0.887737	0	0.308308	0.15628	9	0.11804	A8Y5I3;E9PUJ2;P70388;P70388-2;P70388-4;Q5SV02	A8Y5I3_MOUSE;E9PUJ2_MOUSE;RAD50_MOUSE;RAD50_MOUSE;RAD50_MOUSE;Q5SV02_MOUSE	DNA repair protein RAD50 (Fragment);DNA repair protein RAD50;DNA repair protein RAD50;Isoform 2 of DNA repair protein RAD50;Isoform 4 of DNA repair protein RAD50;DNA repair protein RAD50	Rad50	A8Y5I3;E9PUJ2;P70388;P70388-2;P70388-4;Q5SV02	Mus musculus	;;regulation of mitotic recombination,telomere maintenance via recombination,double-strand break repair via homologous recombination,DNA repair,double-strand break repair,DNA recombination,cellular response to DNA damage stimulus,telomere maintenance via telomerase,reciprocal meiotic recombination,regulation of mitotic cell cycle,telomere capping,telomeric 3' overhang formation,positive regulatio…	;;DNA binding,double-stranded telomeric DNA binding,adenylate kinase activity,ATP binding,protein binding, bridging,single-stranded telomeric DNA binding,metal ion binding,G-quadruplex DNA binding,single-stranded DNA endodeoxyribonuclease activity,ATP-dependent DNA helicase activity,3'-5' exonuclease activity;;;	;;nuclear chromosome, telomeric region,nuclear chromatin,condensed nuclear chromosome,nucleus,nucleoplasm,membrane,Mre11 complex,site of double-strand break,pronucleus;;;	tr;tr;sp;sp;sp;tr	1;1;1;;;1	1;1;1;;;1	uniprot_mouse_proteome	>tr|A8Y5I3|A8Y5I3_MOUSE DNA repair protein RAD50 (Fragment) OS=Mus musculus GN=Rad50 PE=1 SV=1;>tr|E9PUJ2|E9PUJ2_MOUSE DNA repair protein RAD50 OS=Mus musculus GN=Rad50 PE=1 SV=1;>sp|P70388|RAD50_MOUSE DNA repair protein RAD50 OS=Mus musculus GN=Rad50 PE=1 SV=1;>sp|P70388-2|RAD50_MOUSE Isoform 2 of DNA repair protein RAD50 OS=Mus musculus GN=Rad50;>sp|P70388-4|RAD50_MOUSE Isoform 4 of DNA repair …	2	2
TRUE	Old_Decellularized / Young_Decellularized	Old_Decellularized	Young_Decellularized	25	D3YWI4;E9Q1I6;F8WHT5;G3UVW1;P19258	348690	406386	0.220906	0.220906	16.5465	1.16546	0	0.0193525	0.0190981	24	0.224781	D3YWI4;E9Q1I6;F8WHT5;G3UVW1;P19258	D3YWI4_MOUSE;E9Q1I6_MOUSE;F8WHT5_MOUSE;G3UVW1_MOUSE;MPV17_MOUSE	Protein Mpv17;Protein Mpv17;Protein Mpv17;Mpv17 transgene, kidney disease mutant, isoform CRA_b;Protein Mpv17	Mpv17	D3YWI4;E9Q1I6;F8WHT5;G3UVW1;P19258	Mus musculus	;;;;mitochondrial genome maintenance,glomerular basement membrane development,cellular response to reactive oxygen species,homeostatic process,inner ear development,reactive oxygen species metabolic process,regulation of reactive oxygen species metabolic process	;;;;	;;;;mitochondrion,mitochondrial inner membrane,peroxisome,integral component of membrane	tr;tr;tr;tr;sp	1	1	uniprot_mouse_proteome	>tr|D3YWI4|D3YWI4_MOUSE Protein Mpv17 OS=Mus musculus GN=Mpv17 PE=1 SV=1;>tr|E9Q1I6|E9Q1I6_MOUSE Protein Mpv17 OS=Mus musculus GN=Mpv17 PE=1 SV=1;>tr|F8WHT5|F8WHT5_MOUSE Protein Mpv17 OS=Mus musculus GN=Mpv17 PE=1 SV=1;>tr|G3UVW1|G3UVW1_MOUSE Mpv17 transgene, kidney disease mutant, isoform CRA_b OS=Mus musculus GN=Mpv17 PE=1 SV=1;>sp|P19258|MPV17_MOUSE Protein Mpv17 OS=Mus musculus GN=Mpv17 PE=1 …	2	5
TRUE	Old_Decellularized / Young_Decellularized	Old_Decellularized	Young_Decellularized	10	E9PV44;O35143	470471	643241	0.451254	0.451254	36.7228	1.36723	0	0.214812	0.118271	9	0.355951	E9PV44;O35143	E9PV44_MOUSE;ATIF1_MOUSE	ATPase inhibitor, mitochondrial;ATPase inhibitor, mitochondrial	Atpif1	E9PV44;O35143	Mus musculus	;negative regulation of endothelial cell proliferation,heme biosynthetic process,erythrocyte differentiation,negative regulation of ATPase activity,protein homooligomerization,protein homotetramerization,negative regulation of hydrolase activity,mitochondrial depolarization,reactive oxygen species metabolic process,positive regulation of mitochondrial outer membrane permeabilization involved in a…	;protein binding,calmodulin binding,enzyme binding,ATPase inhibitor activity,protein homodimerization activity,angiostatin binding,ATPase binding,5-formyltetrahydrofolate cyclo-ligase activity	;mitochondrion,cell surface,mitochondrial proton-transporting ATP synthase complex	tr;sp	1	1;2	uniprot_mouse_proteome	>tr|E9PV44|E9PV44_MOUSE ATPase inhibitor, mitochondrial OS=Mus musculus GN=Atpif1 PE=1 SV=1;>sp|O35143|ATIF1_MOUSE ATPase inhibitor, mitochondrial OS=Mus musculus GN=Atpif1 PE=1 SV=2	2	2
TRUE	Old_Decellularized / Young_Decellularized	Old_Decellularized	Young_Decellularized	20	O35566	216723	295824	0.448887	0.448887	36.4987	1.36499	0	9.35468e-06	3.09508e-05	19	0.0775934	O35566	CD151_MOUSE	CD151 antigen	Cd151	O35566	Mus musculus	cell surface receptor signaling pathway,cell migration,T cell proliferation	integrin binding	basement membrane,integral component of plasma membrane,focal adhesion	sp	1	2	uniprot_mouse_proteome	>sp|O35566|CD151_MOUSE CD151 antigen OS=Mus musculus GN=Cd151 PE=1 SV=2	2	4
TRUE	Old_Decellularized / Young_Decellularized	Old_Decellularized	Young_Decellularized	25	P60603	2.14896e+06	1.95459e+06	-0.136772	0.136772	-9.04482	0.909552	0	0.42792	0.199762	24	0.112812	P60603	ROMO1_MOUSE	Reactive oxygen species modulator 1	Romo1	P60603	Mus musculus	replicative cell aging,positive regulation of cell proliferation,killing of cells of other organism,cellular response to reactive oxygen species,defense response to bacterium,defense response to Gram-negative bacterium,defense response to Gram-positive bacterium,cytolysis in other organism,Requires Ontology,positive regulation of reactive oxygen species metabolic process	molecular_function	mitochondrion,mitochondrial inner membrane,integral component of membrane	sp	2	1	uniprot_mouse_proteome	>sp|P60603|ROMO1_MOUSE Reactive oxygen species modulator 1 OS=Mus musculus GN=Romo1 PE=2 SV=1	2	5
TRUE	Old_Decellularized / Young_Decellularized	Old_Decellularized	Young_Decellularized	20	Q5F285	812679	911031	0.164815	0.164815	12.1022	1.12102	0	0.073337	0.0526049	19	0.176646	Q5F285	TM256_MOUSE	Transmembrane protein 256	Tmem256	Q5F285	Mus musculus	biological_process	molecular_function	mitochondrial inner membrane,integral component of membrane,extracellular exosome	sp	1	1	uniprot_mouse_proteome	>sp|Q5F285|TM256_MOUSE Transmembrane protein 256 OS=Mus musculus GN=Tmem256 PE=1 SV=1	2	4
TRUE	Old_Decellularized / Young_Decellularized	Old_Decellularized	Young_Decellularized	10	Q5NCE8	28207.3	47703.2	0.758019	0.758019	69.1167	1.69117	0	0.353416	0.172889	9	0.538653	Q5NCE8	MRS2_MOUSE	Magnesium transporter MRS2 homolog, mitochondrial	Mrs2	Q5NCE8	Mus musculus	lactate metabolic process,mitochondrial magnesium ion transport,mitochondrial magnesium ion transmembrane transport	magnesium ion transmembrane transporter activity	mitochondrion,mitochondrial inner membrane,integral component of membrane	sp	2	2	uniprot_mouse_proteome	>sp|Q5NCE8|MRS2_MOUSE Magnesium transporter MRS2 homolog, mitochondrial OS=Mus musculus GN=Mrs2 PE=2 SV=2	2	2
TRUE	Old_Decellularized / Young_Decellularized	Old_Decellularized	Young_Decellularized	10	Q6PGF5	58278.4	38218.8	-0.608678	0.608678	-34.4203	0.655797	0	0.0678038	0.0496601	9	0.230383	Q6PGF5	Q6PGF5_MOUSE	BMS1 homolog, ribosome assembly protein (Yeast)	Bms1	Q6PGF5	Mus musculus	maturation of SSU-rRNA from tricistronic rRNA transcript (SSU-rRNA, 5.8S rRNA, LSU-rRNA),endonucleolytic cleavage of tricistronic rRNA transcript (SSU-rRNA, 5.8S rRNA, LSU-rRNA)	RNA binding,GTPase activity,GTP binding,U3 snoRNA binding	nucleus,nucleolus,90S preribosome	tr	1	1	uniprot_mouse_proteome	>tr|Q6PGF5|Q6PGF5_MOUSE BMS1 homolog, ribosome assembly protein (Yeast) OS=Mus musculus GN=Bms1 PE=1 SV=1	2	2
TRUE	Old_Decellularized / Young_Decellularized	Old_Decellularized	Young_Decellularized	10	Q6PGF7	232494	251184	0.111553	0.111553	8.03906	1.08039	0	0.510363	0.226651	9	0.0667483	Q6PGF7	EXOC8_MOUSE	Exocyst complex component 8	Exoc8	Q6PGF7	Mus musculus	exocyst assembly,exocytosis,endosome organization,protein transport,extracellular matrix disassembly,exocyst localization,membrane organization	Ral GTPase binding,phosphatidylinositol binding	exocyst,late endosome,cytosol,plasma membrane,membrane,growth cone,cell leading edge,perinuclear region of cytoplasm	sp	1	1	uniprot_mouse_proteome	>sp|Q6PGF7|EXOC8_MOUSE Exocyst complex component 8 OS=Mus musculus GN=Exoc8 PE=1 SV=1	2	2
TRUE	Old_Decellularized / Young_Decellularized	Old_Decellularized	Young_Decellularized	10	Q8C4J7	166709	148050	-0.171253	0.171253	-11.1929	0.888071	0	0.0422913	0.0344221	9	0.217339	Q8C4J7	TBL3_MOUSE	Transducin beta-like protein 3	Tbl3	Q8C4J7	Mus musculus	maturation of SSU-rRNA from tricistronic rRNA transcript (SSU-rRNA, 5.8S rRNA, LSU-rRNA)	RNA binding,snoRNA binding	nucleus,nucleolus,small-subunit processome,Pwp2p-containing subcomplex of 90S preribosome	sp	2	1	uniprot_mouse_proteome	>sp|Q8C4J7|TBL3_MOUSE Transducin beta-like protein 3 OS=Mus musculus GN=Tbl3 PE=2 SV=1	2	2
TRUE	Old_Decellularized / Young_Decellularized	Old_Decellularized	Young_Decellularized	10	Q8R059	28741.5	36490.2	0.344376	0.344376	26.9602	1.2696	0	0.0141314	0.0149936	9	0.131968	Q8R059	GALE_MOUSE	UDP-glucose 4-epimerase	Gale	Q8R059	Mus musculus	galactose metabolic process,galactose catabolic process,galactose catabolic process via UDP-galactose,glycolytic process from galactose	UDP-N-acetylglucosamine 4-epimerase activity,UDP-glucose 4-epimerase activity,identical protein binding,protein homodimerization activity	extracellular exosome	sp	1	1	uniprot_mouse_proteome	>sp|Q8R059|GALE_MOUSE UDP-glucose 4-epimerase OS=Mus musculus GN=Gale PE=1 SV=1	2	2
TRUE	Old_Decellularized / Young_Decellularized	Old_Decellularized	Young_Decellularized	10	Q9CR26	293746	109559	-1.42286	1.42286	-62.7027	0.372973	0	0.0168519	0.0171648	9	0.296906	Q9CR26	VTA1_MOUSE	Vacuolar protein sorting-associated protein VTA1 homolog	Vta1	Q9CR26	Mus musculus	protein transport,viral budding,multivesicular body sorting pathway	protein binding,protein C-terminus binding	nucleoplasm,cytoplasm,cytosol,endosome membrane,intracellular membrane-bounded organelle,extracellular exosome	sp	1	1	uniprot_mouse_proteome	>sp|Q9CR26|VTA1_MOUSE Vacuolar protein sorting-associated protein VTA1 homolog OS=Mus musculus GN=Vta1 PE=1 SV=1	2	2
TRUE	Old_Decellularized / Young_Decellularized	Old_Decellularized	Young_Decellularized	15	Q9CXV1	949274	1270256	0.420222	0.420222	33.8134	1.33813	0	7.05508e-05	0.000178063	14	0.0921039	Q9CXV1	DHSD_MOUSE	Succinate dehydrogenase [ubiquinone] cytochrome b small subunit, mitochondrial	Sdhd	Q9CXV1	Mus musculus	tricarboxylic acid cycle,mitochondrial electron transport, succinate to ubiquinone,regulation of catecholamine secretion,cellular response to hypoxia	succinate dehydrogenase activity,heme binding,metal ion binding,ubiquinone binding,succinate dehydrogenase (ubiquinone) activity	mitochondrion,mitochondrial inner membrane,mitochondrial respiratory chain complex II, succinate dehydrogenase complex (ubiquinone),integral component of membrane	sp	1	2	uniprot_mouse_proteome	>sp|Q9CXV1|DHSD_MOUSE Succinate dehydrogenase [ubiquinone] cytochrome b small subunit, mitochondrial OS=Mus musculus GN=Sdhd PE=1 SV=2	2	3
TRUE	Old_Decellularized / Young_Decellularized	Old_Decellularized	Young_Decellularized	10	Q9Z1K8	74583.8	52878.1	-0.496192	0.496192	-29.1024	0.708976	0	0.589356	0.251247	9	0.603872	Q9Z1K8	YLAT1_MOUSE	Y+L amino acid transporter 1	Slc7a7	Q9Z1K8	Mus musculus	regulation of arginine metabolic process,L-alpha-amino acid transmembrane transport,basic amino acid transmembrane transport	basic amino acid transmembrane transporter activity,L-amino acid transmembrane transporter activity,antiporter activity	integral component of plasma membrane,basolateral plasma membrane	sp	1	1	uniprot_mouse_proteome	>sp|Q9Z1K8|YLAT1_MOUSE Y+L amino acid transporter 1 OS=Mus musculus GN=Slc7a7 PE=1 SV=1	2	2
TRUE	Old_Decellularized / Young_Decellularized	Old_Decellularized	Young_Decellularized	10	A0A087WQ32;A0A087WS03;G3X9F1;Q9R1S3;Q9R1S3-2;Q9R1S3-3	59289.6	26032.8	-1.18745	1.18745	-56.0921	0.439079	0	0.00123904	0.00206648	9	0.234179	A0A087WQ32;A0A087WS03;G3X9F1;Q9R1S3;Q9R1S3-2;Q9R1S3-3	A0A087WQ32_MOUSE;A0A087WS03_MOUSE;G3X9F1_MOUSE;PIGN_MOUSE;PIGN_MOUSE;PIGN_MOUSE	GPI ethanolamine phosphate transferase 1;GPI ethanolamine phosphate transferase 1;GPI ethanolamine phosphate transferase 1;GPI ethanolamine phosphate transferase 1;Isoform 2 of GPI ethanolamine phosphate transferase 1;Isoform 3 of GPI ethanolamine phosphate transferase 1	Pign	A0A087WQ32;A0A087WS03;G3X9F1;Q9R1S3;Q9R1S3-2;Q9R1S3-3	Mus musculus	;;;GPI anchor biosynthetic process;;	;;;phosphotransferase activity, for other substituted phosphate groups,mannose-ethanolamine phosphotransferase activity;;	;;;endoplasmic reticulum membrane,cytosol,plasma membrane,membrane,integral component of membrane;;	tr;tr;tr;sp;sp;sp	1;1;1;2;;	1;1;1;2;;	uniprot_mouse_proteome	>tr|A0A087WQ32|A0A087WQ32_MOUSE GPI ethanolamine phosphate transferase 1 OS=Mus musculus GN=Pign PE=1 SV=1;>tr|A0A087WS03|A0A087WS03_MOUSE GPI ethanolamine phosphate transferase 1 OS=Mus musculus GN=Pign PE=1 SV=1;>tr|G3X9F1|G3X9F1_MOUSE GPI ethanolamine phosphate transferase 1 OS=Mus musculus GN=Pign PE=1 SV=1;>sp|Q9R1S3|PIGN_MOUSE GPI ethanolamine phosphate transferase 1 OS=Mus musculus GN=Pign…	2	2
TRUE	Old_Decellularized / Young_Decellularized	Old_Decellularized	Young_Decellularized	10	A0A1D5RL92;G5E8I8;Q8CGZ0	89228	74758	-0.25527	0.25527	-16.2169	0.837831	0	0.183701	0.105487	9	0.142793	A0A1D5RL92;G5E8I8;Q8CGZ0	A0A1D5RL92_MOUSE;G5E8I8_MOUSE;CHERP_MOUSE	Calcium homeostasis endoplasmic reticulum protein	Cherp	A0A1D5RL92;G5E8I8;Q8CGZ0	Mus musculus	;;RNA processing,cellular calcium ion homeostasis,negative regulation of cell proliferation,release of sequestered calcium ion into cytosol,positive regulation of NFAT protein import into nucleus	;;RNA binding,protein binding,ion channel binding	;;cytoplasm,endoplasmic reticulum,membrane,perinuclear region of cytoplasm	tr;tr;sp	4;1;1	1;2;1	uniprot_mouse_proteome	>tr|A0A1D5RL92|A0A1D5RL92_MOUSE Calcium homeostasis endoplasmic reticulum protein OS=Mus musculus GN=Cherp PE=4 SV=1;>tr|G5E8I8|G5E8I8_MOUSE Calcium homeostasis endoplasmic reticulum protein OS=Mus musculus GN=Cherp PE=1 SV=2;>sp|Q8CGZ0|CHERP_MOUSE Calcium homeostasis endoplasmic reticulum protein OS=Mus musculus GN=Cherp PE=1 SV=1	2	2
TRUE	Old_Decellularized / Young_Decellularized	Old_Decellularized	Young_Decellularized	10	B1ART1;B1ART2	11564.6	13571.8	0.230898	0.230898	17.3565	1.17356	0	0.112903	0.0727192	9	0.409267	B1ART1;B1ART2	B1ART1_MOUSE;B1ART2_MOUSE	Protein Vps13d	Vps13d	B1ART1;B1ART2	Mus musculus	;	;molecular_function	;extracellular exosome	tr	1	1;2	uniprot_mouse_proteome	>tr|B1ART1|B1ART1_MOUSE Protein Vps13d OS=Mus musculus GN=Vps13d PE=1 SV=1;>tr|B1ART2|B1ART2_MOUSE Protein Vps13d OS=Mus musculus GN=Vps13d PE=1 SV=2	2	2
TRUE	Old_Decellularized / Young_Decellularized	Old_Decellularized	Young_Decellularized	25	B2RXM2;J3QNY1;Q8BG05-2	3.70542e+06	3120626	-0.247801	0.247801	-15.7821	0.842179	0	0.0269291	0.0244125	24	0.110625	B2RXM2;J3QNY1;Q8BG05-2	B2RXM2_MOUSE;J3QNY1_MOUSE;ROA3_MOUSE	EG627828 protein;Protein Gm9242;Isoform 2 of Heterogeneous nuclear ribonucleoprotein A3	Gm6793;Gm9242;Hnrnpa3	B2RXM2;J3QNY1;Q8BG05-2	Mus musculus	;mRNA transport;	RNA binding;mRNA binding,RNA transmembrane transporter activity;	;nucleoplasm,cytoplasm,ribonucleoprotein granule,neuron projection,catalytic step 2 spliceosome,messenger ribonucleoprotein complex;	tr;tr;sp	1;4;	1;1;	uniprot_mouse_proteome	>tr|B2RXM2|B2RXM2_MOUSE EG627828 protein OS=Mus musculus GN=Gm6793 PE=1 SV=1;>tr|J3QNY1|J3QNY1_MOUSE Protein Gm9242 OS=Mus musculus GN=Gm9242 PE=4 SV=1;>sp|Q8BG05-2|ROA3_MOUSE Isoform 2 of Heterogeneous nuclear ribonucleoprotein A3 OS=Mus musculus GN=Hnrnpa3	2	5
TRUE	Old_Decellularized / Young_Decellularized	Old_Decellularized	Young_Decellularized	15	P62309	709228	661296	-0.100954	0.100954	-6.75838	0.932416	0	0.56809	0.244996	14	0.175422	P62309	RUXG_MOUSE	Small nuclear ribonucleoprotein G	Snrpg	P62309	Mus musculus	spliceosomal snRNP assembly,mRNA splicing, via spliceosome	RNA binding	U5 snRNP,U7 snRNP,U1 snRNP,U2 snRNP,U4 snRNP,U12-type spliceosomal complex,cytosol,methylosome,SMN-Sm protein complex,P granule,U2-type prespliceosome,precatalytic spliceosome,catalytic step 2 spliceosome,spliceosomal tri-snRNP complex	sp	1	1	uniprot_mouse_proteome	>sp|P62309|RUXG_MOUSE Small nuclear ribonucleoprotein G OS=Mus musculus GN=Snrpg PE=1 SV=1	2	3
TRUE	Old_Decellularized / Young_Decellularized	Old_Decellularized	Young_Decellularized	10	P62313	120080	103516	-0.214142	0.214142	-13.7941	0.862059	0	0.11227	0.0725426	9	0.116677	P62313	LSM6_MOUSE	U6 snRNA-associated Sm-like protein LSm6	Lsm6	P62313	Mus musculus	mRNA splicing, via spliceosome,mRNA catabolic process,tRNA processing,maturation of SSU-rRNA	RNA binding,protein heterodimerization activity	cytoplasmic mRNA processing body,spliceosomal complex,U6 snRNP,nucleolus,small nucleolar ribonucleoprotein complex,cytoplasm,U4/U6 x U5 tri-snRNP complex,extracellular exosome	sp	1	1	uniprot_mouse_proteome	>sp|P62313|LSM6_MOUSE U6 snRNA-associated Sm-like protein LSm6 OS=Mus musculus GN=Lsm6 PE=1 SV=1	2	2
TRUE	Old_Decellularized / Young_Decellularized	Old_Decellularized	Young_Decellularized	10	Q06138	122391	85116.3	-0.523985	0.523985	-30.4552	0.695448	0	0.0165934	0.0169743	9	0.207499	Q06138	CAB39_MOUSE	Calcium-binding protein 39	Cab39	Q06138	Mus musculus	positive regulation of peptidyl-threonine phosphorylation,peptidyl-serine phosphorylation,signal transduction by protein phosphorylation,activation of protein kinase activity,intracellular signal transduction,protein heterooligomerization,positive regulation of protein serine/threonine kinase activity	calcium ion binding,kinase binding,protein kinase activator activity,protein serine/threonine kinase activator activity,protein serine/threonine kinase activity	cytoplasm,protein complex,extracellular exosome	sp	1	2	uniprot_mouse_proteome	>sp|Q06138|CAB39_MOUSE Calcium-binding protein 39 OS=Mus musculus GN=Cab39 PE=1 SV=2	2	2
TRUE	Old_Decellularized / Young_Decellularized	Old_Decellularized	Young_Decellularized	15	Q5XKN4	239653	181529	-0.400745	0.400745	-24.2533	0.757467	0	0.0616461	0.0461456	14	0.137144	Q5XKN4	JAGN1_MOUSE	Protein jagunal homolog 1	Jagn1	Q5XKN4	Mus musculus	neutrophil mediated immunity,endoplasmic reticulum organization,protein transport,vesicle-mediated transport,granulocyte colony-stimulating factor signaling pathway,defense response to fungus,negative regulation of insulin secretion involved in cellular response to glucose stimulus,cellular response to tunicamycin,neutrophil migration,neutrophil differentiation	molecular_function	endoplasmic reticulum,endoplasmic reticulum membrane,integral component of membrane	sp	1	2	uniprot_mouse_proteome	>sp|Q5XKN4|JAGN1_MOUSE Protein jagunal homolog 1 OS=Mus musculus GN=Jagn1 PE=1 SV=2	2	3
TRUE	Old_Decellularized / Young_Decellularized	Old_Decellularized	Young_Decellularized	15	Q62313	27799.4	45957.4	0.725243	0.725243	65.3179	1.65318	0	0.0243998	0.0226666	14	0.349098	Q62313	TGON1_MOUSE	Trans-Golgi network integral membrane protein 1	Tgoln1	Q62313	Mus musculus	Golgi to endosome transport		nucleoplasm,endosome,Golgi apparatus,trans-Golgi network,cytosol,plasma membrane,integral component of membrane,trans-Golgi network transport vesicle	sp	1	1	uniprot_mouse_proteome	>sp|Q62313|TGON1_MOUSE Trans-Golgi network integral membrane protein 1 OS=Mus musculus GN=Tgoln1 PE=1 SV=1	2	3
TRUE	Old_Decellularized / Young_Decellularized	Old_Decellularized	Young_Decellularized	15	Q64522	280840	306803	0.127566	0.127566	9.24493	1.09245	0	0.0604729	0.0455206	14	0.262897	Q64522	H2A2B_MOUSE	Histone H2A type 2-B	Hist2h2ab	Q64522	Mus musculus	chromatin silencing	DNA binding,protein heterodimerization activity	nucleosome,nuclear chromatin,nucleus,extracellular exosome	sp	1	3	uniprot_mouse_proteome	>sp|Q64522|H2A2B_MOUSE Histone H2A type 2-B OS=Mus musculus GN=Hist2h2ab PE=1 SV=3	2	3
TRUE	Old_Decellularized / Young_Decellularized	Old_Decellularized	Young_Decellularized	25	Q7TNS2	1.41331e+06	1.9731e+06	0.481385	0.481385	39.6083	1.39608	0	0.0169907	0.0172201	24	0.300182	Q7TNS2	MIC10_MOUSE	MICOS complex subunit Mic10	Minos1	Q7TNS2	Mus musculus	biological_process	molecular_function	mitochondrion,MICOS complex	sp	1	1	uniprot_mouse_proteome	>sp|Q7TNS2|MIC10_MOUSE MICOS complex subunit Mic10 OS=Mus musculus GN=Minos1 PE=1 SV=1	2	5
TRUE	Old_Decellularized / Young_Decellularized	Old_Decellularized	Young_Decellularized	10	Q8QZZ7	36135	30751.9	-0.232721	0.232721	-14.8972	0.851028	0	0.096095	0.0645765	9	0.117575	Q8QZZ7	TPRKB_MOUSE	EKC/KEOPS complex subunit Tprkb	Tprkb	Q8QZZ7	Mus musculus	tRNA processing,biological_process	protein kinase binding	EKC/KEOPS complex,nucleus,cytosol	sp	1	1	uniprot_mouse_proteome	>sp|Q8QZZ7|TPRKB_MOUSE EKC/KEOPS complex subunit Tprkb OS=Mus musculus GN=Tprkb PE=1 SV=1	2	2
TRUE	Old_Decellularized / Young_Decellularized	Old_Decellularized	Young_Decellularized	10	Q8R1K1	180291	153508	-0.232011	0.232011	-14.8553	0.851447	0	0.022085	0.0211146	9	0.0792565	Q8R1K1	UBAC2_MOUSE	Ubiquitin-associated domain-containing protein 2	Ubac2	Q8R1K1	Mus musculus	protein localization to endoplasmic reticulum,negative regulation of retrograde protein transport, ER to cytosol	ubiquitin binding	endoplasmic reticulum,endoplasmic reticulum membrane,integral component of membrane	sp	1	1	uniprot_mouse_proteome	>sp|Q8R1K1|UBAC2_MOUSE Ubiquitin-associated domain-containing protein 2 OS=Mus musculus GN=Ubac2 PE=1 SV=1	2	2
TRUE	Old_Decellularized / Young_Decellularized	Old_Decellularized	Young_Decellularized	15	Q9CQ00	604488	490302	-0.302041	0.302041	-18.8896	0.811104	0	0.331733	0.16496	14	0.178404	Q9CQ00	TM261_MOUSE	Transmembrane protein 261	Tmem261	Q9CQ00	Mus musculus	mitochondrial respiratory chain complex I assembly	molecular_function	mitochondrial inner membrane,integral component of membrane,mitochondrial respiratory chain complex I	sp	1	1	uniprot_mouse_proteome	>sp|Q9CQ00|TM261_MOUSE Transmembrane protein 261 OS=Mus musculus GN=Tmem261 PE=1 SV=1	2	3
TRUE	Old_Decellularized / Young_Decellularized	Old_Decellularized	Young_Decellularized	10	Q9CQV6	662314	669748	0.0161029	0.0161029	1.12242	1.01122	0	0.687373	0.281261	9	0.131078	Q9CQV6	MLP3B_MOUSE	Microtubule-associated proteins 1A/1B light chain 3B	Map1lc3b	Q9CQV6	Mus musculus	autophagosome assembly,mitophagy,autophagy,cellular response to nitrogen starvation,cellular response to starvation,macroautophagy,positive regulation of mucus secretion,autophagosome maturation	protein binding,ubiquitin protein ligase binding	autophagosome membrane,intracellular,mitochondrion,autophagosome,cytosol,microtubule,axoneme,endomembrane system,membrane,cytoplasmic vesicle,autolysosome	sp	1	3	uniprot_mouse_proteome	>sp|Q9CQV6|MLP3B_MOUSE Microtubule-associated proteins 1A/1B light chain 3B OS=Mus musculus GN=Map1lc3b PE=1 SV=3	2	2
TRUE	Old_Decellularized / Young_Decellularized	Old_Decellularized	Young_Decellularized	10	Q9CZR3	93458.7	94954.3	0.0229055	0.0229055	1.60036	1.016	0	0.774359	0.305713	9	0.213184	Q9CZR3	TM40L_MOUSE	Mitochondrial import receptor subunit TOM40B	Tomm40l	Q9CZR3	Mus musculus	ion transport,protein import into mitochondrial matrix	protein channel activity,porin activity	mitochondrion,mitochondrial outer membrane translocase complex,protein complex,pore complex	sp	1	1	uniprot_mouse_proteome	>sp|Q9CZR3|TM40L_MOUSE Mitochondrial import receptor subunit TOM40B OS=Mus musculus GN=Tomm40l PE=1 SV=1	2	2
TRUE	Old_Decellularized / Young_Decellularized	Old_Decellularized	Young_Decellularized	10	Q9D8N3	306554	329231	0.102961	0.102961	7.39756	1.07398	0	0.750668	0.298984	9	0.174239	Q9D8N3	TM86A_MOUSE	Lysoplasmalogenase-like protein TMEM86A	Tmem86a	Q9D8N3	Mus musculus	biological_process	molecular_function	cellular_component,integral component of membrane	sp	2	1	uniprot_mouse_proteome	>sp|Q9D8N3|TM86A_MOUSE Lysoplasmalogenase-like protein TMEM86A OS=Mus musculus GN=Tmem86a PE=2 SV=1	2	2
TRUE	Old_Decellularized / Young_Decellularized	Old_Decellularized	Young_Decellularized	10	A0A0A6YXR0;Q8BGS7;Q8BGS7-2	734247	522564	-0.490659	0.490659	-28.83	0.7117	0	0.00137115	0.00225002	9	0.115393	A0A0A6YXR0;Q8BGS7;Q8BGS7-2	A0A0A6YXR0_MOUSE;CEPT1_MOUSE;CEPT1_MOUSE	Choline/ethanolaminephosphotransferase 1 (Fragment);Choline/ethanolaminephosphotransferase 1;Isoform 2 of Choline/ethanolaminephosphotransferase 1	Cept1	A0A0A6YXR0;Q8BGS7;Q8BGS7-2	Mus musculus	;phosphatidylethanolamine biosynthetic process,phosphatidylcholine biosynthetic process,CDP-choline pathway;	;diacylglycerol cholinephosphotransferase activity,ethanolaminephosphotransferase activity,phosphotransferase activity, for other substituted phosphate groups,metal ion binding;	;endoplasmic reticulum membrane,integral component of membrane,nuclear membrane;	tr;sp;sp	1;1;	1;1;	uniprot_mouse_proteome	>tr|A0A0A6YXR0|A0A0A6YXR0_MOUSE Choline/ethanolaminephosphotransferase 1 (Fragment) OS=Mus musculus GN=Cept1 PE=1 SV=1;>sp|Q8BGS7|CEPT1_MOUSE Choline/ethanolaminephosphotransferase 1 OS=Mus musculus GN=Cept1 PE=1 SV=1;>sp|Q8BGS7-2|CEPT1_MOUSE Isoform 2 of Choline/ethanolaminephosphotransferase 1 OS=Mus musculus GN=Cept1	2	2
TRUE	Old_Decellularized / Young_Decellularized	Old_Decellularized	Young_Decellularized	10	A0A0R4J052;E9PYA3;E9Q2H8;G5E8T9;Q99KB8;Q99KB8-2	84847.5	88046	0.0533844	0.0533844	3.76964	1.0377	0	0.31766	0.159839	9	0.258225	A0A0R4J052;E9PYA3;E9Q2H8;G5E8T9;Q99KB8;Q99KB8-2	A0A0R4J052_MOUSE;E9PYA3_MOUSE;E9Q2H8_MOUSE;G5E8T9_MOUSE;GLO2_MOUSE;GLO2_MOUSE	Hydroxyacylglutathione hydrolase, mitochondrial;Hydroxyacylglutathione hydrolase, mitochondrial (Fragment);Hydroxyacylglutathione hydrolase, mitochondrial (Fragment);Hydroxyacyl glutathione hydrolase;Hydroxyacylglutathione hydrolase, mitochondrial;Isoform 2 of Hydroxyacylglutathione hydrolase, mitochondrial	Hagh	A0A0R4J052;E9PYA3;E9Q2H8;G5E8T9;Q99KB8;Q99KB8-2	Mus musculus	;;;;glutathione biosynthetic process,methylglyoxal catabolic process to D-lactate via S-lactoyl-glutathione;	;;;;hydroxyacylglutathione hydrolase activity,metal ion binding;	;;;;cytoplasm,mitochondrion,mitochondrial matrix,extracellular exosome;	tr;tr;tr;tr;sp;sp	1;1;1;1;1;	1;1;1;1;2;	uniprot_mouse_proteome	>tr|A0A0R4J052|A0A0R4J052_MOUSE Hydroxyacylglutathione hydrolase, mitochondrial OS=Mus musculus GN=Hagh PE=1 SV=1;>tr|E9PYA3|E9PYA3_MOUSE Hydroxyacylglutathione hydrolase, mitochondrial (Fragment) OS=Mus musculus GN=Hagh PE=1 SV=1;>tr|E9Q2H8|E9Q2H8_MOUSE Hydroxyacylglutathione hydrolase, mitochondrial (Fragment) OS=Mus musculus GN=Hagh PE=1 SV=1;>tr|G5E8T9|G5E8T9_MOUSE Hydroxyacyl glutathione hyd…	2	2
TRUE	Old_Decellularized / Young_Decellularized	Old_Decellularized	Young_Decellularized	10	A0A0U1RPY3;D3YTR6;D3YWA9;D3YWU4;Q8R0G7	128993	120408	-0.0993651	0.0993651	-6.65563	0.933444	0	0.651048	0.271222	9	0.138803	A0A0U1RPY3;D3YTR6;D3YWA9;D3YWU4;Q8R0G7	A0A0U1RPY3_MOUSE;D3YTR6_MOUSE;D3YWA9_MOUSE;D3YWU4_MOUSE;SPNS1_MOUSE	Protein spinster homolog 1 (Fragment);Protein spinster homolog 1;Protein spinster homolog 1;Protein spinster homolog 1 (Fragment);Protein spinster homolog 1	Spns1	A0A0U1RPY3;D3YTR6;D3YWA9;D3YWU4;Q8R0G7	Mus musculus	;;;;sphingosine-1-phosphate signaling pathway,lipid transport,locomotion,transmembrane transport	;;;;sphingolipid transporter activity	;;;;mitochondrial inner membrane,lysosomal membrane,integral component of membrane,vesicle	tr;tr;tr;tr;sp	1;1;1;1;2	1	uniprot_mouse_proteome	>tr|A0A0U1RPY3|A0A0U1RPY3_MOUSE Protein spinster homolog 1 (Fragment) OS=Mus musculus GN=Spns1 PE=1 SV=1;>tr|D3YTR6|D3YTR6_MOUSE Protein spinster homolog 1 OS=Mus musculus GN=Spns1 PE=1 SV=1;>tr|D3YWA9|D3YWA9_MOUSE Protein spinster homolog 1 OS=Mus musculus GN=Spns1 PE=1 SV=1;>tr|D3YWU4|D3YWU4_MOUSE Protein spinster homolog 1 (Fragment) OS=Mus musculus GN=Spns1 PE=1 SV=1;>sp|Q8R0G7|SPNS1_MOUSE Pr…	2	2
TRUE	Old_Decellularized / Young_Decellularized	Old_Decellularized	Young_Decellularized	10	B1AVH5;Q8C0P5	33586.3	46252.8	0.461669	0.461669	37.7134	1.37713	0	0.324599	0.162201	9	0.633871	B1AVH5;Q8C0P5	B1AVH5_MOUSE;COR2A_MOUSE	Coronin;Coronin-2A	Coro2a	B1AVH5;Q8C0P5	Mus musculus	;actin cytoskeleton organization	;actin binding,actin filament binding	;brush border,actin cytoskeleton,transcriptional repressor complex	tr;sp	1;2	1	uniprot_mouse_proteome	>tr|B1AVH5|B1AVH5_MOUSE Coronin OS=Mus musculus GN=Coro2a PE=1 SV=1;>sp|Q8C0P5|COR2A_MOUSE Coronin-2A OS=Mus musculus GN=Coro2a PE=2 SV=1	2	2
TRUE	Old_Decellularized / Young_Decellularized	Old_Decellularized	Young_Decellularized	10	D3YVK1;P15105	112986	86436.9	-0.386422	0.386422	-23.4975	0.765025	0	0.056564	0.0432726	9	0.203804	D3YVK1;P15105	D3YVK1_MOUSE;GLNA_MOUSE	Glutamine synthetase (Fragment);Glutamine synthetase	Glul	D3YVK1;P15105	Mus musculus	;glutamine biosynthetic process,cell proliferation,cellular response to starvation,response to glucose,ammonia assimilation cycle,positive regulation of insulin secretion,positive regulation of epithelial cell proliferation,protein homooligomerization,positive regulation of synaptic transmission, glutamatergic	;magnesium ion binding,glutamate decarboxylase activity,glutamate-ammonia ligase activity,protein binding,ATP binding,glutamate binding,manganese ion binding,identical protein binding,dynein light chain binding	;nucleus,cytoplasm,mitochondrion,rough endoplasmic reticulum,cytosol,perikaryon,myelin sheath,protein complex,axon terminus,cell body,extracellular exosome,glial cell projection,astrocyte projection	tr;sp	1	8;6	uniprot_mouse_proteome	>tr|D3YVK1|D3YVK1_MOUSE Glutamine synthetase (Fragment) OS=Mus musculus GN=Glul PE=1 SV=8;>sp|P15105|GLNA_MOUSE Glutamine synthetase OS=Mus musculus GN=Glul PE=1 SV=6	2	2
TRUE	Old_Decellularized / Young_Decellularized	Old_Decellularized	Young_Decellularized	10	D3Z0F5;O88545	48160.4	54834	0.187223	0.187223	13.857	1.13857	0	0.0711069	0.0513525	9	0.144039	D3Z0F5;O88545	D3Z0F5_MOUSE;CSN6_MOUSE	COP9 signalosome complex subunit 6	Cops6	D3Z0F5;O88545	Mus musculus	;protein deneddylation	;protein binding	;nucleoplasm,cytoplasm,COP9 signalosome,extracellular exosome	tr;sp	1	1	uniprot_mouse_proteome	>tr|D3Z0F5|D3Z0F5_MOUSE COP9 signalosome complex subunit 6 OS=Mus musculus GN=Cops6 PE=1 SV=1;>sp|O88545|CSN6_MOUSE COP9 signalosome complex subunit 6 OS=Mus musculus GN=Cops6 PE=1 SV=1	2	2
TRUE	Old_Decellularized / Young_Decellularized	Old_Decellularized	Young_Decellularized	10	E0CX79;E0CXM9;E0CXR3;E0CZD9;Q9DB43	183817	164806	-0.157504	0.157504	-10.3425	0.896575	0	0.290426	0.149296	9	0.376153	E0CX79;E0CXM9;E0CXR3;E0CZD9;Q9DB43	E0CX79_MOUSE;E0CXM9_MOUSE;E0CXR3_MOUSE;E0CZD9_MOUSE;ZFPL1_MOUSE	Zinc finger protein-like 1 (Fragment);Zinc finger protein-like 1 (Fragment);Zinc finger protein-like 1 (Fragment);Zinc finger protein-like 1 (Fragment);Zinc finger protein-like 1	Zfpl1	E0CX79;E0CXM9;E0CXR3;E0CZD9;Q9DB43	Mus musculus	;;;;biological_process,vesicle-mediated transport	;;;;protein binding,metal ion binding	;;;;Golgi apparatus,integral component of membrane	tr;tr;tr;tr;sp	1	1;1;8;1;1	uniprot_mouse_proteome	>tr|E0CX79|E0CX79_MOUSE Zinc finger protein-like 1 (Fragment) OS=Mus musculus GN=Zfpl1 PE=1 SV=1;>tr|E0CXM9|E0CXM9_MOUSE Zinc finger protein-like 1 (Fragment) OS=Mus musculus GN=Zfpl1 PE=1 SV=1;>tr|E0CXR3|E0CXR3_MOUSE Zinc finger protein-like 1 (Fragment) OS=Mus musculus GN=Zfpl1 PE=1 SV=8;>tr|E0CZD9|E0CZD9_MOUSE Zinc finger protein-like 1 (Fragment) OS=Mus musculus GN=Zfpl1 PE=1 SV=1;>sp|Q9DB43|…	2	2
TRUE	Old_Decellularized / Young_Decellularized	Old_Decellularized	Young_Decellularized	10	F7C0H6;Q5M8N0	206190	160801	-0.358693	0.358693	-22.0129	0.779871	0	0.0481899	0.0380292	9	0.113648	F7C0H6;Q5M8N0	F7C0H6_MOUSE;CNRP1_MOUSE	CB1 cannabinoid receptor-interacting protein 1 (Fragment);CB1 cannabinoid receptor-interacting protein 1	Cnrip1	F7C0H6;Q5M8N0	Mus musculus	;biological_process	;molecular_function	;myelin sheath	tr;sp	1	1	uniprot_mouse_proteome	>tr|F7C0H6|F7C0H6_MOUSE CB1 cannabinoid receptor-interacting protein 1 (Fragment) OS=Mus musculus GN=Cnrip1 PE=1 SV=1;>sp|Q5M8N0|CNRP1_MOUSE CB1 cannabinoid receptor-interacting protein 1 OS=Mus musculus GN=Cnrip1 PE=1 SV=1	2	2
TRUE	Old_Decellularized / Young_Decellularized	Old_Decellularized	Young_Decellularized	10	P21126	78418.7	111401	0.506498	0.506498	42.0597	1.4206	0	0.00688563	0.00854573	9	0.166854	P21126	UBL4A_MOUSE	Ubiquitin-like protein 4A	Ubl4a	P21126	Mus musculus	transport,tail-anchored membrane protein insertion into ER membrane	chaperone binding	nucleus,cytoplasm,cytosol,membrane,BAT3 complex	sp	1	1	uniprot_mouse_proteome	>sp|P21126|UBL4A_MOUSE Ubiquitin-like protein 4A OS=Mus musculus GN=Ubl4a PE=1 SV=1	2	2
TRUE	Old_Decellularized / Young_Decellularized	Old_Decellularized	Young_Decellularized	10	Q8BGY7	459303	565358	0.299718	0.299718	23.0903	1.2309	0	0.0457989	0.0365468	9	0.128416	Q8BGY7	F210A_MOUSE	Protein FAM210A	Fam210a	Q8BGY7	Mus musculus	biological_process	molecular_function	mitochondrion,integral component of membrane	sp	1	1	uniprot_mouse_proteome	>sp|Q8BGY7|F210A_MOUSE Protein FAM210A OS=Mus musculus GN=Fam210a PE=1 SV=1	2	2
TRUE	Old_Decellularized / Young_Decellularized	Old_Decellularized	Young_Decellularized	15	Q9D3B1	640897	442338	-0.534945	0.534945	-30.9815	0.690185	0	0.00486608	0.00636608	14	0.157333	Q9D3B1	HACD2_MOUSE	Very-long-chain (3R)-3-hydroxyacyl-CoA dehydratase 2	Hacd2	Q9D3B1	Mus musculus	sphingolipid biosynthetic process,fatty acid elongation,very long-chain fatty acid biosynthetic process	3-hydroxyacyl-CoA dehydratase activity,enzyme binding,3R-hydroxyacyl-CoA dehydratase activity,Requires Ontology,3-hydroxy-behenoyl-CoA dehydratase activity,3-hydroxy-lignoceroyl-CoA dehydratase activity	endoplasmic reticulum,integral component of endoplasmic reticulum membrane	sp	1	1	uniprot_mouse_proteome	>sp|Q9D3B1|HACD2_MOUSE Very-long-chain (3R)-3-hydroxyacyl-CoA dehydratase 2 OS=Mus musculus GN=Hacd2 PE=1 SV=1	2	3
TRUE	Old_Decellularized / Young_Decellularized	Old_Decellularized	Young_Decellularized	10	Q9D554	88555.3	90885	0.0374636	0.0374636	2.63079	1.02631	0	0.921448	0.345422	9	0.102364	Q9D554	SF3A3_MOUSE	Splicing factor 3A subunit 3	Sf3a3	Q9D554	Mus musculus	mRNA splicing, via spliceosome,mRNA processing	RNA binding,zinc ion binding	nucleoplasm,spliceosomal complex,catalytic step 2 spliceosome	sp	1	2	uniprot_mouse_proteome	>sp|Q9D554|SF3A3_MOUSE Splicing factor 3A subunit 3 OS=Mus musculus GN=Sf3a3 PE=1 SV=2	2	2
TRUE	Old_Decellularized / Young_Decellularized	Old_Decellularized	Young_Decellularized	10	Q9DB34	98181.3	108300	0.141508	0.141508	10.3058	1.10306	0	0.141052	0.0862893	9	0.238696	Q9DB34	CHM2A_MOUSE	Charged multivesicular body protein 2a	Chmp2a	Q9DB34	Mus musculus	cell separation after cytokinesis,nucleus organization,vacuolar transport,mitotic metaphase plate congression,membrane invagination,exit from mitosis,regulation of centrosome duplication,protein transport,nuclear envelope reassembly,viral budding via host ESCRT complex,establishment of protein localization,regulation of viral process,protein polymerization,protein homooligomerization,protein hete…	protein binding,protein domain specific binding,phosphatidylcholine binding	ESCRT III complex,nuclear envelope,cytosol,membrane,membrane coat,late endosome membrane,extracellular exosome,chromatin	sp	1	1	uniprot_mouse_proteome	>sp|Q9DB34|CHM2A_MOUSE Charged multivesicular body protein 2a OS=Mus musculus GN=Chmp2a PE=1 SV=1	2	2
TRUE	Old_Decellularized / Young_Decellularized	Old_Decellularized	Young_Decellularized	10	Q9EQF6	136404	56984.1	-1.25926	1.25926	-58.2241	0.417759	0	0.000165767	0.000374619	9	0.200487	Q9EQF6	DPYL5_MOUSE	Dihydropyrimidinase-related protein 5	Dpysl5	Q9EQF6	Mus musculus	axon guidance	protein binding,microtubule binding,hydrolase activity, acting on carbon-nitrogen (but not peptide) bonds	cytoplasm,dendrite,neuronal cell body	sp	1	1	uniprot_mouse_proteome	>sp|Q9EQF6|DPYL5_MOUSE Dihydropyrimidinase-related protein 5 OS=Mus musculus GN=Dpysl5 PE=1 SV=1	2	2
TRUE	Old_Decellularized / Young_Decellularized	Old_Decellularized	Young_Decellularized	10	Q9Z1X2;Q9Z1X2-2	448428	394227	-0.185849	0.185849	-12.0868	0.879132	0	0.0101138	0.0116652	9	0.0489989	Q9Z1X2;Q9Z1X2-2	PTSS2_MOUSE	Phosphatidylserine synthase 2;Isoform 2 of Phosphatidylserine synthase 2	Ptdss2	Q9Z1X2;Q9Z1X2-2	Mus musculus	phosphatidylserine biosynthetic process;	CDP-diacylglycerol-serine O-phosphatidyltransferase activity;	intracellular,endoplasmic reticulum membrane,membrane,integral component of membrane;	sp	1;	2;	uniprot_mouse_proteome	>sp|Q9Z1X2|PTSS2_MOUSE Phosphatidylserine synthase 2 OS=Mus musculus GN=Ptdss2 PE=1 SV=2;>sp|Q9Z1X2-2|PTSS2_MOUSE Isoform 2 of Phosphatidylserine synthase 2 OS=Mus musculus GN=Ptdss2	2	2
TRUE	Old_Decellularized / Young_Decellularized	Old_Decellularized	Young_Decellularized	10	A0A0R4IZX2;A0A0R4J006;Q9JHL1;Q9JHL1-2	71607.2	91480.3	0.353357	0.353357	27.753	1.27753	0	0.158222	0.0945294	9	0.201076	A0A0R4IZX2;A0A0R4J006;Q9JHL1;Q9JHL1-2	A0A0R4IZX2_MOUSE;A0A0R4J006_MOUSE;NHRF2_MOUSE;NHRF2_MOUSE	Na(+)/H(+) exchange regulatory cofactor NHE-RF;Na(+)/H(+) exchange regulatory cofactor NHE-RF2;Na(+)/H(+) exchange regulatory cofactor NHE-RF2;Isoform 2 of Na(+)/H(+) exchange regulatory cofactor NHE-RF2	Slc9a3r2	A0A0R4IZX2;A0A0R4J006;Q9JHL1;Q9JHL1-2	Mus musculus	;;sensory perception of sound,negative regulation of phosphatidylinositol 3-kinase signaling;	;;receptor binding,protein binding,beta-catenin binding,protein C-terminus binding,phosphatase binding,protein complex scaffold,cadherin binding;	;;nucleus,cytoplasm,plasma membrane,focal adhesion,endomembrane system,apical plasma membrane,stereocilium,stereocilium bundle,extracellular exosome;	tr;tr;sp;sp	1;1;1;	1;1;2;	uniprot_mouse_proteome	>tr|A0A0R4IZX2|A0A0R4IZX2_MOUSE Na(+)/H(+) exchange regulatory cofactor NHE-RF OS=Mus musculus GN=Slc9a3r2 PE=1 SV=1;>tr|A0A0R4J006|A0A0R4J006_MOUSE Na(+)/H(+) exchange regulatory cofactor NHE-RF2 OS=Mus musculus GN=Slc9a3r2 PE=1 SV=1;>sp|Q9JHL1|NHRF2_MOUSE Na(+)/H(+) exchange regulatory cofactor NHE-RF2 OS=Mus musculus GN=Slc9a3r2 PE=1 SV=2;>sp|Q9JHL1-2|NHRF2_MOUSE Isoform 2 of Na(+)/H(+) exchan…	2	2
TRUE	Old_Decellularized / Young_Decellularized	Old_Decellularized	Young_Decellularized	15	A0A0R4J272;Q921N7	292946	267055	-0.133498	0.133498	-8.83814	0.911619	0	0.402531	0.190384	14	0.0807776	A0A0R4J272;Q921N7	A0A0R4J272_MOUSE;TMM70_MOUSE	Transmembrane protein 70, mitochondrial;Transmembrane protein 70, mitochondrial	Tmem70	A0A0R4J272;Q921N7	Mus musculus	;mitochondrial proton-transporting ATP synthase complex assembly	;molecular_function	;nucleoplasm,mitochondrion,mitochondrial inner membrane,integral component of mitochondrial membrane	tr;sp	1;2	1;2	uniprot_mouse_proteome	>tr|A0A0R4J272|A0A0R4J272_MOUSE Transmembrane protein 70, mitochondrial OS=Mus musculus GN=Tmem70 PE=1 SV=1;>sp|Q921N7|TMM70_MOUSE Transmembrane protein 70, mitochondrial OS=Mus musculus GN=Tmem70 PE=2 SV=2	2	3
TRUE	Old_Decellularized / Young_Decellularized	Old_Decellularized	Young_Decellularized	10	A0A140LIQ8;A0A140LJ56;Q9CQG6	23531.3	11341.6	-1.05295	1.05295	-51.8019	0.481981	0	0.0653463	0.0483821	9	0.501839	A0A140LIQ8;A0A140LJ56;Q9CQG6	A0A140LIQ8_MOUSE;A0A140LJ56_MOUSE;TM147_MOUSE	Transmembrane protein 147	Tmem147	A0A140LIQ8;A0A140LJ56;Q9CQG6	Mus musculus	;;protein destabilization	;;molecular_function	;;endoplasmic reticulum membrane,membrane,integral component of membrane	tr;tr;sp	1	1	uniprot_mouse_proteome	>tr|A0A140LIQ8|A0A140LIQ8_MOUSE Transmembrane protein 147 OS=Mus musculus GN=Tmem147 PE=1 SV=1;>tr|A0A140LJ56|A0A140LJ56_MOUSE Transmembrane protein 147 OS=Mus musculus GN=Tmem147 PE=1 SV=1;>sp|Q9CQG6|TM147_MOUSE Transmembrane protein 147 OS=Mus musculus GN=Tmem147 PE=1 SV=1	2	2
TRUE	Old_Decellularized / Young_Decellularized	Old_Decellularized	Young_Decellularized	10	A2A9I0;O35166	389168	365634	-0.0899951	0.0899951	-6.0474	0.939526	0	0.0243102	0.0226134	9	0.0813375	A2A9I0;O35166	A2A9I0_MOUSE;GOSR2_MOUSE	Golgi SNAP receptor complex member 2	Gosr2	A2A9I0;O35166	Mus musculus	;protein targeting to vacuole,ER to Golgi vesicle-mediated transport,intra-Golgi vesicle-mediated transport,Golgi to vacuole transport,vesicle-mediated transport,retrograde transport, endosome to Golgi,vesicle fusion with Golgi apparatus	;SNARE binding,SNAP receptor activity	;Golgi membrane,endoplasmic reticulum membrane,Golgi apparatus,cytosol,ER to Golgi transport vesicle membrane,membrane,integral component of membrane,SNARE complex,late endosome membrane	tr;sp	1	1;2	uniprot_mouse_proteome	>tr|A2A9I0|A2A9I0_MOUSE Golgi SNAP receptor complex member 2 OS=Mus musculus GN=Gosr2 PE=1 SV=1;>sp|O35166|GOSR2_MOUSE Golgi SNAP receptor complex member 2 OS=Mus musculus GN=Gosr2 PE=1 SV=2	2	2
TRUE	Old_Decellularized / Young_Decellularized	Old_Decellularized	Young_Decellularized	10	A3KGB4	37687.1	30524.5	-0.304102	0.304102	-19.0054	0.809946	0	0.0860968	0.0594548	9	0.148114	A3KGB4	TBC8B_MOUSE	TBC1 domain family member 8B	Tbc1d8b	A3KGB4	Mus musculus	intracellular protein transport,regulation of vesicle fusion,activation of GTPase activity	GTPase activator activity,calcium ion binding,Rab GTPase binding	intracellular,endomembrane system	sp	1	1	uniprot_mouse_proteome	>sp|A3KGB4|TBC8B_MOUSE TBC1 domain family member 8B OS=Mus musculus GN=Tbc1d8b PE=1 SV=1	2	2
TRUE	Old_Decellularized / Young_Decellularized	Old_Decellularized	Young_Decellularized	10	B0R1E3;P70349	842785	948179	0.169995	0.169995	12.5055	1.12505	0	0.0438494	0.0353873	9	0.0716889	B0R1E3;P70349	B0R1E3_MOUSE;HINT1_MOUSE	Histidine triad nucleotide-binding protein 1	Hint1	B0R1E3;P70349	Mus musculus	;transcription, DNA-templated,regulation of transcription, DNA-templated,purine ribonucleotide catabolic process,positive regulation of calcium-mediated signaling,intrinsic apoptotic signaling pathway by p53 class mediator	;nucleotide binding,hydrolase activity	;histone deacetylase complex,nucleus,cytosol,plasma membrane,extracellular exosome	tr;sp	1	1;3	uniprot_mouse_proteome	>tr|B0R1E3|B0R1E3_MOUSE Histidine triad nucleotide-binding protein 1 OS=Mus musculus GN=Hint1 PE=1 SV=1;>sp|P70349|HINT1_MOUSE Histidine triad nucleotide-binding protein 1 OS=Mus musculus GN=Hint1 PE=1 SV=3	2	2
TRUE	Old_Decellularized / Young_Decellularized	Old_Decellularized	Young_Decellularized	10	B9EKS2;Q6ZPY7;Q6ZPY7-2	345777	511238	0.564153	0.564153	47.8519	1.47852	0	0.570024	0.24565	9	0.251385	B9EKS2;Q6ZPY7;Q6ZPY7-2	B9EKS2_MOUSE;KDM3B_MOUSE;KDM3B_MOUSE	Jumonji domain containing 1B;Lysine-specific demethylase 3B;Isoform 2 of Lysine-specific demethylase 3B	Kdm3b	B9EKS2;Q6ZPY7;Q6ZPY7-2	Mus musculus	;transcription, DNA-templated,regulation of transcription, DNA-templated,histone H3-K9 demethylation,oxidation-reduction process;	;transcription regulatory region sequence-specific DNA binding,chromatin DNA binding,histone demethylase activity (H3-K9 specific),metal ion binding,dioxygenase activity;	;chromatin,nucleus;	tr;sp;sp	1;1;	1;2;	uniprot_mouse_proteome	>tr|B9EKS2|B9EKS2_MOUSE Jumonji domain containing 1B OS=Mus musculus GN=Kdm3b PE=1 SV=1;>sp|Q6ZPY7|KDM3B_MOUSE Lysine-specific demethylase 3B OS=Mus musculus GN=Kdm3b PE=1 SV=2;>sp|Q6ZPY7-2|KDM3B_MOUSE Isoform 2 of Lysine-specific demethylase 3B OS=Mus musculus GN=Kdm3b	2	2
TRUE	Old_Decellularized / Young_Decellularized	Old_Decellularized	Young_Decellularized	10	D3YYK0;Q8K4F5	85802.8	82680.6	-0.0534758	0.0534758	-3.6388	0.963612	0	0.871549	0.33218	9	0.121351	D3YYK0;Q8K4F5	D3YYK0_MOUSE;ABHDB_MOUSE	Abhydrolase domain containing 11, isoform CRA_b;Protein ABHD11	Abhd11	D3YYK0;Q8K4F5	Mus musculus	;	;hydrolase activity	;mitochondrion	tr;sp	1	1	uniprot_mouse_proteome	>tr|D3YYK0|D3YYK0_MOUSE Abhydrolase domain containing 11, isoform CRA_b OS=Mus musculus GN=Abhd11 PE=1 SV=1;>sp|Q8K4F5|ABHDB_MOUSE Protein ABHD11 OS=Mus musculus GN=Abhd11 PE=1 SV=1	2	2
TRUE	Old_Decellularized / Young_Decellularized	Old_Decellularized	Young_Decellularized	10	D3Z4E3;Q8BZS9;Q8BZS9-2	37039	23426.6	-0.660899	0.660899	-36.7516	0.632484	0	0.542911	0.237349	9	0.590882	D3Z4E3;Q8BZS9;Q8BZS9-2	D3Z4E3_MOUSE;DHX32_MOUSE;DHX32_MOUSE	DEAH (Asp-Glu-Ala-His) box polypeptide 32, isoform CRA_b;Putative pre-mRNA-splicing factor ATP-dependent RNA helicase DHX32;Isoform 2 of Putative pre-mRNA-splicing factor ATP-dependent RNA helicase DHX32	Dhx32	D3Z4E3;Q8BZS9;Q8BZS9-2	Mus musculus	;mRNA splicing, via spliceosome;	;RNA binding,ATP-dependent RNA helicase activity,ATP binding;	;spliceosomal complex,cytoplasm,mitochondrion;	tr;sp;sp	1;1;	1;2;	uniprot_mouse_proteome	>tr|D3Z4E3|D3Z4E3_MOUSE DEAH (Asp-Glu-Ala-His) box polypeptide 32, isoform CRA_b OS=Mus musculus GN=Dhx32 PE=1 SV=1;>sp|Q8BZS9|DHX32_MOUSE Putative pre-mRNA-splicing factor ATP-dependent RNA helicase DHX32 OS=Mus musculus GN=Dhx32 PE=1 SV=2;>sp|Q8BZS9-2|DHX32_MOUSE Isoform 2 of Putative pre-mRNA-splicing factor ATP-dependent RNA helicase DHX32 OS=Mus musculus GN=Dhx32	2	2
TRUE	Old_Decellularized / Young_Decellularized	Old_Decellularized	Young_Decellularized	10	E9PYD6;O88597	312245	276159	-0.177181	0.177181	-11.5571	0.884429	0	0.651701	0.271398	9	0.12061	E9PYD6;O88597	E9PYD6_MOUSE;BECN1_MOUSE	Beclin-1	Becn1	E9PYD6;O88597	Mus musculus	;autophagosome assembly,mitophagy,macromitophagy,cytokinesis,angiogenesis,response to hypoxia,autophagy,apoptotic process,cellular response to nitrogen starvation,lysosome organization,mitotic metaphase plate congression,aging,negative regulation of cell proliferation,response to iron(II) ion,response to lead ion,macroautophagy,regulation of cytokinesis,receptor catabolic process,response to vita…	;protein binding,ubiquitin protein ligase binding,phosphatidylinositol 3-kinase binding,GTPase binding	;pre-autophagosomal structure,nucleus,cytoplasm,endosome,autophagosome,endoplasmic reticulum,endoplasmic reticulum membrane,trans-Golgi network,cytosol,cytoskeleton,endosome membrane,membrane,extrinsic component of membrane,dendrite,cytoplasmic vesicle,mitochondrial membrane,phosphatidylinositol 3-kinase complex, class III, type I,phosphatidylinositol 3-kinase complex, class III, type II,phosphat…	tr;sp	1	1;3	uniprot_mouse_proteome	>tr|E9PYD6|E9PYD6_MOUSE Beclin-1 OS=Mus musculus GN=Becn1 PE=1 SV=1;>sp|O88597|BECN1_MOUSE Beclin-1 OS=Mus musculus GN=Becn1 PE=1 SV=3	2	2
TRUE	Old_Decellularized / Young_Decellularized	Old_Decellularized	Young_Decellularized	10	F6XRE6;Q9JHF5	85544	108720	0.345885	0.345885	27.0931	1.27093	0	0.0214811	0.0206903	9	0.130807	F6XRE6;Q9JHF5	F6XRE6_MOUSE;Q9JHF5_MOUSE	V-type proton ATPase subunit a (Fragment);V-type proton ATPase subunit a	Tcirg1	F6XRE6;Q9JHF5	Mus musculus	;vacuolar acidification,protein catabolic process in the vacuole,ATP synthesis coupled proton transport,ATP hydrolysis coupled proton transport,macroautophagy,vacuolar proton-transporting V-type ATPase complex assembly	;proton-transporting ATPase activity, rotational mechanism,ATPase binding	;vacuolar proton-transporting V-type ATPase, V0 domain,mitochondrion,lysosomal membrane,plasma membrane,integral component of membrane,apical plasma membrane,vacuolar proton-transporting V-type ATPase complex	tr	1	1	uniprot_mouse_proteome	>tr|F6XRE6|F6XRE6_MOUSE V-type proton ATPase subunit a (Fragment) OS=Mus musculus GN=Tcirg1 PE=1 SV=1;>tr|Q9JHF5|Q9JHF5_MOUSE V-type proton ATPase subunit a OS=Mus musculus GN=Tcirg1 PE=1 SV=1	2	2
TRUE	Old_Decellularized / Young_Decellularized	Old_Decellularized	Young_Decellularized	10	H3BL08;Q8C172	104700	77867.3	-0.427175	0.427175	-25.6283	0.743717	0	0.232355	0.125128	9	0.196907	H3BL08;Q8C172	H3BL08_MOUSE;CERS6_MOUSE	Ceramide synthase 6	Cers6	H3BL08;Q8C172	Mus musculus	;sphingolipid biosynthetic process,ceramide biosynthetic process	;DNA binding,sphingosine N-acyltransferase activity	;endoplasmic reticulum,endoplasmic reticulum membrane,membrane,integral component of membrane,nuclear membrane	tr;sp	1	1	uniprot_mouse_proteome	>tr|H3BL08|H3BL08_MOUSE Ceramide synthase 6 OS=Mus musculus GN=Cers6 PE=1 SV=1;>sp|Q8C172|CERS6_MOUSE Ceramide synthase 6 OS=Mus musculus GN=Cers6 PE=1 SV=1	2	2
TRUE	Old_Decellularized / Young_Decellularized	Old_Decellularized	Young_Decellularized	10	O55242;O55242-2	227604	205839	-0.14501	0.14501	-9.56266	0.904373	0	0.43335	0.201552	9	0.0652868	O55242;O55242-2	SGMR1_MOUSE	Sigma non-opioid intracellular receptor 1;Isoform 2 of Sigma non-opioid intracellular receptor 1	Sigmar1	O55242;O55242-2	Mus musculus	lipid transport,nervous system development,opioid receptor signaling pathway,regulation of neuron apoptotic process,protein homotrimerization;	receptor activity,opioid receptor activity,protein binding;	nuclear envelope,nuclear inner membrane,nuclear outer membrane,endoplasmic reticulum,endoplasmic reticulum membrane,lipid particle,postsynaptic density,integral component of membrane,cell junction,growth cone,cytoplasmic vesicle,postsynaptic membrane;	sp	1;	1;	uniprot_mouse_proteome	>sp|O55242|SGMR1_MOUSE Sigma non-opioid intracellular receptor 1 OS=Mus musculus GN=Sigmar1 PE=1 SV=1;>sp|O55242-2|SGMR1_MOUSE Isoform 2 of Sigma non-opioid intracellular receptor 1 OS=Mus musculus GN=Sigmar1	2	2
TRUE	Old_Decellularized / Young_Decellularized	Old_Decellularized	Young_Decellularized	10	P08905	48373.1	97864.9	1.01659	1.01659	102.312	2.02312	0	0.00618424	0.00781369	9	0.353785	P08905	LYZ2_MOUSE	Lysozyme C-2	Lyz2	P08905	Mus musculus	cell wall macromolecule catabolic process,cytolysis,defense response to bacterium,defense response to Gram-negative bacterium,defense response to Gram-positive bacterium	lysozyme activity,identical protein binding	extracellular space,extracellular exosome	sp	1	2	uniprot_mouse_proteome	>sp|P08905|LYZ2_MOUSE Lysozyme C-2 OS=Mus musculus GN=Lyz2 PE=1 SV=2	2	2
TRUE	Old_Decellularized / Young_Decellularized	Old_Decellularized	Young_Decellularized	20	P0C0S6;Q3THW5	4480124	4.22836e+06	-0.0834406	0.0834406	-5.61959	0.943804	0	0.239266	0.128094	19	0.107497	P0C0S6;Q3THW5	H2AZ_MOUSE;H2AV_MOUSE	Histone H2A.Z;Histone H2A.V	H2afz;H2afv	P0C0S6;Q3THW5	Mus musculus	chromatin silencing,multicellular organism development,positive regulation of transcription from RNA polymerase II promoter,cellular response to estradiol stimulus;chromatin silencing	RNA polymerase II core promoter proximal region sequence-specific DNA binding,RNA polymerase II core promoter sequence-specific DNA binding,RNA polymerase II distal enhancer sequence-specific DNA binding,DNA binding,chromatin DNA binding,nucleosomal DNA binding,protein heterodimerization activity;DNA binding,protein heterodimerization activity	nucleosome,nuclear chromatin,nucleus,nuclear euchromatin,nuclear heterochromatin,extracellular exosome,Barr body;nucleosome,nuclear chromatin,nucleus,extracellular exosome	sp	1	2;3	uniprot_mouse_proteome	>sp|P0C0S6|H2AZ_MOUSE Histone H2A.Z OS=Mus musculus GN=H2afz PE=1 SV=2;>sp|Q3THW5|H2AV_MOUSE Histone H2A.V OS=Mus musculus GN=H2afv PE=1 SV=3	2	4
TRUE	Old_Decellularized / Young_Decellularized	Old_Decellularized	Young_Decellularized	10	P16015	86467.1	65483.1	-0.401028	0.401028	-24.2682	0.757318	0	0.88449	0.334872	9	0.380971	P16015	CAH3_MOUSE	Carbonic anhydrase 3	Ca3	P16015	Mus musculus	one-carbon metabolic process,response to oxidative stress,dephosphorylation,response to ethanol	carbonate dehydratase activity,zinc ion binding,nickel cation binding,phosphatase activity	cytosol	sp	1	3	uniprot_mouse_proteome	>sp|P16015|CAH3_MOUSE Carbonic anhydrase 3 OS=Mus musculus GN=Ca3 PE=1 SV=3	2	2
TRUE	Old_Decellularized / Young_Decellularized	Old_Decellularized	Young_Decellularized	10	P37913;Q3U4X8	32351.7	13595.5	-1.25071	1.25071	-57.9759	0.420241	0	0.0766108	0.0544059	9	0.522766	P37913;Q3U4X8	DNLI1_MOUSE;Q3U4X8_MOUSE	DNA ligase 1;DNA ligase	Lig1	P37913;Q3U4X8	Mus musculus	DNA replication,DNA ligation,DNA repair,base-excision repair,double-strand break repair via nonhomologous end joining,DNA recombination,response to hydrogen peroxide,cell division,DNA biosynthetic process,Okazaki fragment processing involved in mitotic DNA replication;	DNA binding,DNA ligase activity,DNA ligase (ATP) activity,ATP binding,metal ion binding;	nucleus,nucleoplasm,mitochondrion,intracellular membrane-bounded organelle;	sp;tr	1	2;1	uniprot_mouse_proteome	>sp|P37913|DNLI1_MOUSE DNA ligase 1 OS=Mus musculus GN=Lig1 PE=1 SV=2;>tr|Q3U4X8|Q3U4X8_MOUSE DNA ligase OS=Mus musculus GN=Lig1 PE=1 SV=1	2	2
TRUE	Old_Decellularized / Young_Decellularized	Old_Decellularized	Young_Decellularized	15	P61028	111120	108890	-0.0292548	0.0292548	-2.00736	0.979926	0	0.103502	0.068204	14	0.138139	P61028	RAB8B_MOUSE	Ras-related protein Rab-8B	Rab8b	P61028	Mus musculus	vesicle docking involved in exocytosis,protein secretion,regulation of exocytosis,antigen processing and presentation,positive regulation of cell projection organization,adherens junction organization,protein import into peroxisome membrane,positive regulation of corticotropin secretion,protein localization to plasma membrane	GTPase activity,receptor binding,protein binding,GTP binding,GDP binding,TPR domain binding	nucleoplasm,mitochondrion,endosome,peroxisomal membrane,plasma membrane,synaptic vesicle,nuclear body,secretory granule membrane,phagocytic vesicle membrane,intracellular membrane-bounded organelle,phagocytic vesicle,perinuclear region of cytoplasm,cell tip,extracellular exosome	sp	1	1	uniprot_mouse_proteome	>sp|P61028|RAB8B_MOUSE Ras-related protein Rab-8B OS=Mus musculus GN=Rab8b PE=1 SV=1	2	3
TRUE	Old_Decellularized / Young_Decellularized	Old_Decellularized	Young_Decellularized	15	P62274	562092	520461	-0.111017	0.111017	-7.40649	0.925935	0	0.0206541	0.0200768	14	0.143472	P62274	RS29_MOUSE	40S ribosomal protein S29	Rps29	P62274	Mus musculus	translation,positive regulation of apoptotic process	structural constituent of ribosome,zinc ion binding	focal adhesion,small ribosomal subunit,cytosolic small ribosomal subunit,extracellular exosome	sp	3	2	uniprot_mouse_proteome	>sp|P62274|RS29_MOUSE 40S ribosomal protein S29 OS=Mus musculus GN=Rps29 PE=3 SV=2	2	3
TRUE	Old_Decellularized / Young_Decellularized	Old_Decellularized	Young_Decellularized	10	P62488	46058.1	31723	-0.537926	0.537926	-31.124	0.68876	0	0.0299385	0.0264349	9	0.180577	P62488	RPB7_MOUSE	DNA-directed RNA polymerase II subunit RPB7	Polr2g	P62488	Mus musculus	nuclear-transcribed mRNA catabolic process, exonucleolytic,transcription from RNA polymerase II promoter,transcription initiation from RNA polymerase II promoter,apoptotic process,positive regulation of translational initiation,positive regulation of nuclear-transcribed mRNA poly(A) tail shortening	single-stranded DNA binding,single-stranded RNA binding,translation initiation factor binding,DNA-directed RNA polymerase activity	cytoplasmic mRNA processing body,nucleus,nucleoplasm,DNA-directed RNA polymerase II, core complex	sp	1	1	uniprot_mouse_proteome	>sp|P62488|RPB7_MOUSE DNA-directed RNA polymerase II subunit RPB7 OS=Mus musculus GN=Polr2g PE=1 SV=1	2	2
TRUE	Old_Decellularized / Young_Decellularized	Old_Decellularized	Young_Decellularized	10	P83887;Q8VCK3	93820	73114.9	-0.35973	0.35973	-22.069	0.77931	0	0.00809736	0.0098104	9	0.116726	P83887;Q8VCK3	TBG1_MOUSE;TBG2_MOUSE	Tubulin gamma-1 chain;Tubulin gamma-2 chain	Tubg1;Tubg2	P83887;Q8VCK3	Mus musculus	meiotic spindle organization,microtubule nucleation,mitotic spindle organization,regulation of mitotic nuclear division,cytoplasmic microtubule organization;microtubule nucleation,cytoplasmic microtubule organization	GTPase activity,structural constituent of cytoskeleton,protein binding,GTP binding,identical protein binding;GTPase activity,GTP binding	pericentriolar material,condensed nuclear chromosome,spindle pole,gamma-tubulin complex,cytoplasm,centrosome,centriole,microtubule organizing center,polar microtubule,spindle microtubule,cytoplasmic microtubule,cilium,cell leading edge,ciliary basal body,apical part of cell,recycling endosome,Requires Ontology;pericentriolar material,gamma-tubulin complex,centrosome,microtubule,spindle microtubul…	sp	1	1	uniprot_mouse_proteome	>sp|P83887|TBG1_MOUSE Tubulin gamma-1 chain OS=Mus musculus GN=Tubg1 PE=1 SV=1;>sp|Q8VCK3|TBG2_MOUSE Tubulin gamma-2 chain OS=Mus musculus GN=Tubg2 PE=1 SV=1	2	2
TRUE	Old_Decellularized / Young_Decellularized	Old_Decellularized	Young_Decellularized	10	Q00899	130005	95663.5	-0.442528	0.442528	-26.4156	0.735844	0	0.00121996	0.00204186	9	0.095258	Q00899	TYY1_MOUSE	Transcriptional repressor protein YY1	Yy1	Q00899	Mus musculus	negative regulation of transcription from RNA polymerase II promoter,double-strand break repair via homologous recombination,transcription, DNA-templated,regulation of transcription, DNA-templated,RNA localization,cellular response to DNA damage stimulus,spermatogenesis,anterior/posterior pattern specification,response to UV-C,positive regulation of gene expression,negative regulation of gene exp…	four-way junction DNA binding,RNA polymerase II core promoter proximal region sequence-specific DNA binding,core promoter proximal region sequence-specific DNA binding,transcriptional repressor activity, RNA polymerase II core promoter proximal region sequence-specific binding,enhancer sequence-specific DNA binding,DNA binding,transcription factor activity, sequence-specific DNA binding,RNA bindi…	nuclear chromatin,nucleus,nucleoplasm,transcription factor complex,cytoplasm,nuclear matrix,Ino80 complex,PcG protein complex	sp	1	1	uniprot_mouse_proteome	>sp|Q00899|TYY1_MOUSE Transcriptional repressor protein YY1 OS=Mus musculus GN=Yy1 PE=1 SV=1	2	2
TRUE	Old_Decellularized / Young_Decellularized	Old_Decellularized	Young_Decellularized	10	Q14C51	151857	139626	-0.121144	0.121144	-8.05414	0.919459	0	0.426794	0.199347	9	0.174478	Q14C51	PTCD3_MOUSE	Pentatricopeptide repeat domain-containing protein 3, mitochondrial	Ptcd3	Q14C51	Mus musculus	regulation of translation,mitochondrial translation	RNA binding,rRNA binding,ribosomal small subunit binding	nucleoplasm,mitochondrion,cytosol,ribosome,plasma membrane	sp	1	2	uniprot_mouse_proteome	>sp|Q14C51|PTCD3_MOUSE Pentatricopeptide repeat domain-containing protein 3, mitochondrial OS=Mus musculus GN=Ptcd3 PE=1 SV=2	2	2
TRUE	Old_Decellularized / Young_Decellularized	Old_Decellularized	Young_Decellularized	10	Q505D7	452026	532218	0.235613	0.235613	17.7407	1.17741	0	0.296816	0.151543	9	0.232633	Q505D7	OPA3_MOUSE	Optic atrophy 3 protein homolog	Opa3	Q505D7	Mus musculus	visual perception,regulation of lipid metabolic process,growth,neuromuscular process,mitochondrion morphogenesis	molecular_function	mitochondrion	sp	1	1	uniprot_mouse_proteome	>sp|Q505D7|OPA3_MOUSE Optic atrophy 3 protein homolog OS=Mus musculus GN=Opa3 PE=1 SV=1	2	2
TRUE	Old_Decellularized / Young_Decellularized	Old_Decellularized	Young_Decellularized	10	Q61142;Q61142-2	91572.5	75750.8	-0.273654	0.273654	-17.2778	0.827222	0	0.356364	0.173913	9	0.184455	Q61142;Q61142-2	SPIN1_MOUSE	Spindlin-1;Isoform 2 of Spindlin-1	Spin1	Q61142;Q61142-2	Mus musculus	female meiotic division,multicellular organism development,rRNA transcription,Wnt signaling pathway,chromatin modification,positive regulation of Wnt signaling pathway;	DNA binding,methylated histone binding;	nucleus,nucleoplasm,nucleolus,spindle,cytosol,nuclear membrane;	sp	1;	2;	uniprot_mouse_proteome	>sp|Q61142|SPIN1_MOUSE Spindlin-1 OS=Mus musculus GN=Spin1 PE=1 SV=2;>sp|Q61142-2|SPIN1_MOUSE Isoform 2 of Spindlin-1 OS=Mus musculus GN=Spin1	2	2
TRUE	Old_Decellularized / Young_Decellularized	Old_Decellularized	Young_Decellularized	10	Q61245;Q61245-2	530769	272382	-0.962452	0.962452	-48.6816	0.513184	0	0.000307767	0.000627863	9	0.168209	Q61245;Q61245-2	COBA1_MOUSE	Collagen alpha-1(XI) chain;Isoform Short of Collagen alpha-1(XI) chain	Col11a1	Q61245;Q61245-2	Mus musculus	cartilage condensation,ossification,chondrocyte development,heart morphogenesis,proteoglycan metabolic process,visual perception,sensory perception of sound,collagen fibril organization,endodermal cell differentiation,tendon development,inner ear morphogenesis,embryonic skeletal system morphogenesis,skeletal system morphogenesis,detection of mechanical stimulus involved in sensory perception of s…	molecular_function,extracellular matrix structural constituent,metal ion binding;	proteinaceous extracellular matrix,collagen trimer,collagen type XI trimer,extracellular space;	sp	1;	2;	uniprot_mouse_proteome	>sp|Q61245|COBA1_MOUSE Collagen alpha-1(XI) chain OS=Mus musculus GN=Col11a1 PE=1 SV=2;>sp|Q61245-2|COBA1_MOUSE Isoform Short of Collagen alpha-1(XI) chain OS=Mus musculus GN=Col11a1	2	2
TRUE	Old_Decellularized / Young_Decellularized	Old_Decellularized	Young_Decellularized	10	Q6PHN7	149411	82528.6	-0.856316	0.856316	-44.7639	0.552361	0	0.00317347	0.00448501	9	0.201943	Q6PHN7	TM164_MOUSE	Transmembrane protein 164	Tmem164	Q6PHN7	Mus musculus	biological_process	molecular_function	cellular_component,integral component of membrane	sp	1	1	uniprot_mouse_proteome	>sp|Q6PHN7|TM164_MOUSE Transmembrane protein 164 OS=Mus musculus GN=Tmem164 PE=1 SV=1	2	2
TRUE	Old_Decellularized / Young_Decellularized	Old_Decellularized	Young_Decellularized	10	Q6QD59	147857	133093	-0.151764	0.151764	-9.98509	0.900149	0	0.164095	0.0970953	9	0.111129	Q6QD59	SEC20_MOUSE	Vesicle transport protein SEC20	Bnip1	Q6QD59	Mus musculus	autophagy,apoptotic process,endoplasmic reticulum organization,protein transport,vesicle-mediated transport,endoplasmic reticulum membrane fusion	SNAP receptor activity	Golgi membrane,nuclear envelope,cytoplasm,mitochondrion,endoplasmic reticulum,endoplasmic reticulum membrane,integral component of membrane,SNARE complex,intracellular membrane-bounded organelle	sp	1	1	uniprot_mouse_proteome	>sp|Q6QD59|SEC20_MOUSE Vesicle transport protein SEC20 OS=Mus musculus GN=Bnip1 PE=1 SV=1	2	2
TRUE	Old_Decellularized / Young_Decellularized	Old_Decellularized	Young_Decellularized	15	Q8BH58	56722.5	61119.1	0.107704	0.107704	7.75119	1.07751	0	0.211964	0.117155	14	0.0572602	Q8BH58	TIPRL_MOUSE	TIP41-like protein	Tiprl	Q8BH58	Mus musculus	DNA damage checkpoint,negative regulation of phosphoprotein phosphatase activity	molecular_function	cytoplasm	sp	1	1	uniprot_mouse_proteome	>sp|Q8BH58|TIPRL_MOUSE TIP41-like protein OS=Mus musculus GN=Tiprl PE=1 SV=1	2	3
TRUE	Old_Decellularized / Young_Decellularized	Old_Decellularized	Young_Decellularized	10	Q8C788;Q91ZR2	120884	74485.3	-0.6986	0.6986	-38.383	0.61617	0	0.0013251	0.00218199	9	0.135562	Q8C788;Q91ZR2	Q8C788_MOUSE;SNX18_MOUSE	Sorting nexin;Sorting nexin-18	Snx18	Q8C788;Q91ZR2	Mus musculus	;mitotic cytokinesis,endocytosis,protein transport,endosomal transport,cleavage furrow formation,positive regulation of GTPase activity	;protein binding,phosphatidylinositol-4,5-bisphosphate binding,phosphatidylinositol binding	;endosome membrane,growth cone,cytoplasmic vesicle membrane,extrinsic component of cytoplasmic side of plasma membrane,cytoplasmic vesicle,neuronal cell body,extracellular exosome,clathrin-coated vesicle	tr;sp	1	1	uniprot_mouse_proteome	>tr|Q8C788|Q8C788_MOUSE Sorting nexin OS=Mus musculus GN=Snx18 PE=1 SV=1;>sp|Q91ZR2|SNX18_MOUSE Sorting nexin-18 OS=Mus musculus GN=Snx18 PE=1 SV=1	2	2
TRUE	Old_Decellularized / Young_Decellularized	Old_Decellularized	Young_Decellularized	10	Q8K0D7	85188.4	75367.9	-0.176707	0.176707	-11.528	0.88472	0	0.393192	0.187022	9	0.185526	Q8K0D7	WRB_MOUSE	Tail-anchored protein insertion receptor WRB	Wrb	Q8K0D7	Mus musculus	biological_process,tail-anchored membrane protein insertion into ER membrane	molecular_function	endoplasmic reticulum membrane,integral component of membrane	sp	1	1	uniprot_mouse_proteome	>sp|Q8K0D7|WRB_MOUSE Tail-anchored protein insertion receptor WRB OS=Mus musculus GN=Wrb PE=1 SV=1	2	2
TRUE	Old_Decellularized / Young_Decellularized	Old_Decellularized	Young_Decellularized	15	Q9CQZ6	628393	623869	-0.0104241	0.0104241	-0.719941	0.992801	0	0.444549	0.20505	14	0.202631	Q9CQZ6	NDUB3_MOUSE	NADH dehydrogenase [ubiquinone] 1 beta subcomplex subunit 3	Ndufb3	Q9CQZ6	Mus musculus	electron transport chain,mitochondrial respiratory chain complex I assembly	molecular_function	mitochondrion,mitochondrial inner membrane,mitochondrial respiratory chain complex I,integral component of membrane,extracellular exosome	sp	1	1	uniprot_mouse_proteome	>sp|Q9CQZ6|NDUB3_MOUSE NADH dehydrogenase [ubiquinone] 1 beta subcomplex subunit 3 OS=Mus musculus GN=Ndufb3 PE=1 SV=1	2	3
TRUE	Old_Decellularized / Young_Decellularized	Old_Decellularized	Young_Decellularized	10	Q9CXL1	85200.6	80769.7	-0.0770502	0.0770502	-5.2006	0.947994	0	0.700337	0.284524	9	0.113562	Q9CXL1	TM50A_MOUSE	Transmembrane protein 50A	Tmem50a	Q9CXL1	Mus musculus			cytoplasm,endoplasmic reticulum,integral component of membrane	sp	1	1	uniprot_mouse_proteome	>sp|Q9CXL1|TM50A_MOUSE Transmembrane protein 50A OS=Mus musculus GN=Tmem50a PE=1 SV=1	2	2
TRUE	Old_Decellularized / Young_Decellularized	Old_Decellularized	Young_Decellularized	10	Q9CZ16	34942.2	51806.3	0.568156	0.568156	48.2627	1.48263	0	0.019518	0.0192348	9	0.424429	Q9CZ16	T178A_MOUSE	Transmembrane protein 178A	Tmem178a	Q9CZ16	Mus musculus	negative regulation of osteoclast differentiation,regulation of cytosolic calcium ion concentration	protein binding	endoplasmic reticulum membrane,integral component of membrane	sp	1	3	uniprot_mouse_proteome	>sp|Q9CZ16|T178A_MOUSE Transmembrane protein 178A OS=Mus musculus GN=Tmem178a PE=1 SV=3	2	2
TRUE	Old_Decellularized / Young_Decellularized	Old_Decellularized	Young_Decellularized	10	Q9D0Q7	44683	38164.8	-0.227481	0.227481	-14.5875	0.854125	0	0.295801	0.151133	9	0.190959	Q9D0Q7	RM45_MOUSE	39S ribosomal protein L45, mitochondrial	Mrpl45	Q9D0Q7	Mus musculus	biological_process	RNA binding	mitochondrion,mitochondrial large ribosomal subunit	sp	1	1	uniprot_mouse_proteome	>sp|Q9D0Q7|RM45_MOUSE 39S ribosomal protein L45, mitochondrial OS=Mus musculus GN=Mrpl45 PE=1 SV=1	2	2
TRUE	Old_Decellularized / Young_Decellularized	Old_Decellularized	Young_Decellularized	15	Q9D1Q4	310914	363788	0.226587	0.226587	17.0063	1.17006	0	0.00645895	0.00810561	14	0.149281	Q9D1Q4	DPM3_MOUSE	Dolichol-phosphate mannosyltransferase subunit 3	Dpm3	Q9D1Q4	Mus musculus	GPI anchor biosynthetic process,regulation of protein stability,protein O-linked mannosylation	dolichyl-phosphate beta-D-mannosyltransferase activity	endoplasmic reticulum,endoplasmic reticulum membrane,membrane,integral component of endoplasmic reticulum membrane,dolichol-phosphate-mannose synthase complex	sp	1	1	uniprot_mouse_proteome	>sp|Q9D1Q4|DPM3_MOUSE Dolichol-phosphate mannosyltransferase subunit 3 OS=Mus musculus GN=Dpm3 PE=1 SV=1	2	3
TRUE	Old_Decellularized / Young_Decellularized	Old_Decellularized	Young_Decellularized	10	Q9ERA6	51754	51149.1	-0.01696	0.01696	-1.1687	0.988313	0	0.867785	0.331404	9	0.160193	Q9ERA6	TFP11_MOUSE	Tuftelin-interacting protein 11	Tfip11	Q9ERA6	Mus musculus	spliceosomal complex disassembly,regulation of transcription, DNA-templated,cell differentiation,extracellular matrix organization,biomineral tissue development,negative regulation of protein complex assembly,negative regulation of protein binding	DNA binding,protein binding	nuclear chromosome, telomeric region,proteinaceous extracellular matrix,intracellular,nucleus,spliceosomal complex,nucleolus,cytoplasm,nuclear speck,U2-type post-mRNA release spliceosomal complex,catalytic step 2 spliceosome	sp	1	1	uniprot_mouse_proteome	>sp|Q9ERA6|TFP11_MOUSE Tuftelin-interacting protein 11 OS=Mus musculus GN=Tfip11 PE=1 SV=1	2	2
TRUE	Old_Decellularized / Young_Decellularized	Old_Decellularized	Young_Decellularized	15	Q9ERN0	273537	265941	-0.0406305	0.0406305	-2.777	0.97223	0	0.492151	0.220833	14	0.0965468	Q9ERN0	SCAM2_MOUSE	Secretory carrier-associated membrane protein 2	Scamp2	Q9ERN0	Mus musculus	protein transport		Golgi apparatus,integral component of membrane,transport vesicle,trans-Golgi network membrane,intracellular membrane-bounded organelle,recycling endosome membrane,extracellular exosome	sp	1	1	uniprot_mouse_proteome	>sp|Q9ERN0|SCAM2_MOUSE Secretory carrier-associated membrane protein 2 OS=Mus musculus GN=Scamp2 PE=1 SV=1	2	3
TRUE	Old_Decellularized / Young_Decellularized	Old_Decellularized	Young_Decellularized	15	Q9QZI8	204768	197998	-0.0485062	0.0485062	-3.3063	0.966937	0	0.467855	0.213014	14	0.0943342	Q9QZI8	SERC1_MOUSE	Serine incorporator 1	Serinc1	Q9QZI8	Mus musculus	phosphatidylserine metabolic process,sphingolipid metabolic process,phospholipid biosynthetic process,L-serine transport,membrane biogenesis,positive regulation of CDP-diacylglycerol-serine O-phosphatidyltransferase activity,positive regulation of serine C-palmitoyltransferase activity	L-serine transmembrane transporter activity,enzyme binding,protein binding, bridging	endoplasmic reticulum membrane,plasma membrane,integral component of membrane,extracellular exosome	sp	1	1	uniprot_mouse_proteome	>sp|Q9QZI8|SERC1_MOUSE Serine incorporator 1 OS=Mus musculus GN=Serinc1 PE=1 SV=1	2	3
TRUE	Old_Decellularized / Young_Decellularized	Old_Decellularized	Young_Decellularized	15	Q9R1Q6	81931.3	74350.8	-0.140067	0.140067	-9.25229	0.907477	0	0.451821	0.207503	14	0.270182	Q9R1Q6	T176B_MOUSE	Transmembrane protein 176B	Tmem176b	Q9R1Q6	Mus musculus	cell differentiation,negative regulation of dendritic cell differentiation	protein binding	integral component of membrane,nuclear membrane	sp	1	1	uniprot_mouse_proteome	>sp|Q9R1Q6|T176B_MOUSE Transmembrane protein 176B OS=Mus musculus GN=Tmem176b PE=1 SV=1	2	3
TRUE	Old_Decellularized / Young_Decellularized	Old_Decellularized	Young_Decellularized	10	Q9R226	66498.2	46698.2	-0.509948	0.509948	-29.7752	0.702248	0	0.0666347	0.0490052	9	0.2958	Q9R226	KHDR3_MOUSE	KH domain-containing, RNA-binding, signal transduction-associated protein 3	Khdrbs3	Q9R226	Mus musculus	transcription, DNA-templated,regulation of transcription, DNA-templated,mRNA processing,regulation of mRNA splicing, via spliceosome,protein oligomerization	RNA binding,SH3 domain binding,protein domain specific binding,identical protein binding	nucleus,nucleoplasm	sp	1	1	uniprot_mouse_proteome	>sp|Q9R226|KHDR3_MOUSE KH domain-containing, RNA-binding, signal transduction-associated protein 3 OS=Mus musculus GN=Khdrbs3 PE=1 SV=1	2	2
TRUE	Old_Decellularized / Young_Decellularized	Old_Decellularized	Young_Decellularized	10	A0A087WPM0;Q3UQA7	143217	113003	-0.341838	0.341838	-21.0965	0.789035	0	0.0767474	0.0544216	9	0.159	A0A087WPM0;Q3UQA7	A0A087WPM0_MOUSE;SELH_MOUSE	Protein 2700094K13Rik;Selenoprotein H	2700094K13Rik;Selh	A0A087WPM0;Q3UQA7	Mus musculus	;	;RNA binding	;	tr;sp	1	1;2	uniprot_mouse_proteome	>tr|A0A087WPM0|A0A087WPM0_MOUSE Protein 2700094K13Rik OS=Mus musculus GN=2700094K13Rik PE=1 SV=1;>sp|Q3UQA7|SELH_MOUSE Selenoprotein H OS=Mus musculus GN=Selh PE=1 SV=2	2	2
TRUE	Old_Decellularized / Young_Decellularized	Old_Decellularized	Young_Decellularized	10	A0A0G2JDF7;Q3UN04	87417.1	78557.9	-0.15416	0.15416	-10.1345	0.898655	0	0.112477	0.0725426	9	0.0856236	A0A0G2JDF7;Q3UN04	A0A0G2JDF7_MOUSE;UBP30_MOUSE	Ubiquitin carboxyl-terminal hydrolase 30 (Fragment);Ubiquitin carboxyl-terminal hydrolase 30	Usp30	A0A0G2JDF7;Q3UN04	Mus musculus	;mitophagy,ubiquitin-dependent protein catabolic process,mitochondrial fusion,protein deubiquitination,protein K11-linked deubiquitination,protein K6-linked deubiquitination,negative regulation of macromitophagy	;cysteine-type endopeptidase activity,thiol-dependent ubiquitin-specific protease activity,protein binding,thiol-dependent ubiquitinyl hydrolase activity	;mitochondrion,mitochondrial outer membrane,integral component of membrane	tr;sp	1	1	uniprot_mouse_proteome	>tr|A0A0G2JDF7|A0A0G2JDF7_MOUSE Ubiquitin carboxyl-terminal hydrolase 30 (Fragment) OS=Mus musculus GN=Usp30 PE=1 SV=1;>sp|Q3UN04|UBP30_MOUSE Ubiquitin carboxyl-terminal hydrolase 30 OS=Mus musculus GN=Usp30 PE=1 SV=1	2	2
TRUE	Old_Decellularized / Young_Decellularized	Old_Decellularized	Young_Decellularized	10	A2AWN8;P59326	79839	63174	-0.337764	0.337764	-20.8733	0.791267	0	0.0171567	0.0173146	9	0.102614	A2AWN8;P59326	A2AWN8_MOUSE;YTHD1_MOUSE	YTH domain family 1, isoform CRA_a;YTH domain-containing family protein 1	Ythdf1	A2AWN8;P59326	Mus musculus	;positive regulation of translation,positive regulation of translational initiation	;RNA binding,ribosome binding,N6-methyladenosine-containing RNA binding	;cellular_component,cytoplasm	tr;sp	1	1	uniprot_mouse_proteome	>tr|A2AWN8|A2AWN8_MOUSE YTH domain family 1, isoform CRA_a OS=Mus musculus GN=Ythdf1 PE=1 SV=1;>sp|P59326|YTHD1_MOUSE YTH domain-containing family protein 1 OS=Mus musculus GN=Ythdf1 PE=1 SV=1	2	2
TRUE	Old_Decellularized / Young_Decellularized	Old_Decellularized	Young_Decellularized	10	D3Z3D2;Q9CQ49	145974	98820.5	-0.562829	0.562829	-32.3027	0.676973	0	0.00581881	0.00744164	9	0.154365	D3Z3D2;Q9CQ49	D3Z3D2_MOUSE;NCBP2_MOUSE	Nuclear cap-binding protein subunit 2	Ncbp2	D3Z3D2;Q9CQ49	Mus musculus	;nuclear-transcribed mRNA catabolic process, nonsense-mediated decay,mRNA splicing, via spliceosome,snRNA export from nucleus,regulation of translational initiation,RNA splicing,gene silencing by RNA,positive regulation of mRNA 3'-end processing,mRNA cis splicing, via spliceosome,positive regulation of RNA export from nucleus,mRNA transport,pre-mRNA cleavage required for polyadenylation	;RNA cap binding,RNA 7-methylguanosine cap binding,mRNA binding,snRNA binding,RNA binding	;nucleus,nucleoplasm,cytoplasm,mRNA cap binding complex,nuclear cap binding complex,RNA cap binding complex	tr;sp	1	1	uniprot_mouse_proteome	>tr|D3Z3D2|D3Z3D2_MOUSE Nuclear cap-binding protein subunit 2 OS=Mus musculus GN=Ncbp2 PE=1 SV=1;>sp|Q9CQ49|NCBP2_MOUSE Nuclear cap-binding protein subunit 2 OS=Mus musculus GN=Ncbp2 PE=1 SV=1	2	2
TRUE	Old_Decellularized / Young_Decellularized	Old_Decellularized	Young_Decellularized	10	E0CX98;E0CXR0;E0CZE8;Q9D2C7	316236	314829	-0.00643046	0.00643046	-0.444734	0.995553	0	0.666999	0.275542	9	0.123432	E0CX98;E0CXR0;E0CZE8;Q9D2C7	E0CX98_MOUSE;E0CXR0_MOUSE;E0CZE8_MOUSE;BI1_MOUSE	Bax inhibitor 1 (Fragment);Bax inhibitor 1 (Fragment);Bax inhibitor 1 (Fragment);Bax inhibitor 1	Tmbim6	E0CX98;E0CXR0;E0CZE8;Q9D2C7	Mus musculus	;;;autophagy,response to unfolded protein,negative regulation of calcium ion transport into cytosol,negative regulation of protein binding,endoplasmic reticulum calcium ion homeostasis,response to endoplasmic reticulum stress,negative regulation of apoptotic process,negative regulation of immunoglobulin secretion,negative regulation of endoribonuclease activity,intrinsic apoptotic signaling pathw…	;;;enzyme binding,ubiquitin protein ligase binding,endoribonuclease inhibitor activity	;;;cytoplasm,endoplasmic reticulum,endoplasmic reticulum membrane,membrane,integral component of membrane,mitochondrial membrane	tr;tr;tr;sp	1	1	uniprot_mouse_proteome	>tr|E0CX98|E0CX98_MOUSE Bax inhibitor 1 (Fragment) OS=Mus musculus GN=Tmbim6 PE=1 SV=1;>tr|E0CXR0|E0CXR0_MOUSE Bax inhibitor 1 (Fragment) OS=Mus musculus GN=Tmbim6 PE=1 SV=1;>tr|E0CZE8|E0CZE8_MOUSE Bax inhibitor 1 (Fragment) OS=Mus musculus GN=Tmbim6 PE=1 SV=1;>sp|Q9D2C7|BI1_MOUSE Bax inhibitor 1 OS=Mus musculus GN=Tmbim6 PE=1 SV=1	2	2
TRUE	Old_Decellularized / Young_Decellularized	Old_Decellularized	Young_Decellularized	15	E9PVN6;Q9D6K5;Q9D6K5-2;Q9D6K5-4	102331	132400	0.371662	0.371662	29.3842	1.29384	0	0.0568842	0.0434746	14	0.166912	E9PVN6;Q9D6K5;Q9D6K5-2;Q9D6K5-4	E9PVN6_MOUSE;SYJ2B_MOUSE;SYJ2B_MOUSE;SYJ2B_MOUSE	Protein Gm20498;Synaptojanin-2-binding protein;Isoform 2 of Synaptojanin-2-binding protein;Isoform 4 of Synaptojanin-2-binding protein	Gm20498;Synj2bp;Synj2bp;Synj2bp	E9PVN6;Q9D6K5;Q9D6K5-2;Q9D6K5-4	Mus musculus	;negative regulation of endothelial cell proliferation,protein targeting,endocytosis,cytoplasm organization,Rho protein signal transduction,regulation of Notch signaling pathway,negative regulation of endothelial cell migration,negative regulation of angiogenesis,regulation of endocytosis,intracellular distribution of mitochondria,negative regulation of ERK1 and ERK2 cascade,negative regulation o…	;protein binding,protein C-terminus binding;;	;mitochondrion,mitochondrial outer membrane,integral component of mitochondrial outer membrane,perinuclear region of cytoplasm;;	tr;sp;sp;sp	1;1;;	1;1;;	uniprot_mouse_proteome	>tr|E9PVN6|E9PVN6_MOUSE Protein Gm20498 OS=Mus musculus GN=Gm20498 PE=1 SV=1;>sp|Q9D6K5|SYJ2B_MOUSE Synaptojanin-2-binding protein OS=Mus musculus GN=Synj2bp PE=1 SV=1;>sp|Q9D6K5-2|SYJ2B_MOUSE Isoform 2 of Synaptojanin-2-binding protein OS=Mus musculus GN=Synj2bp;>sp|Q9D6K5-4|SYJ2B_MOUSE Isoform 4 of Synaptojanin-2-binding protein OS=Mus musculus GN=Synj2bp	2	3
TRUE	Old_Decellularized / Young_Decellularized	Old_Decellularized	Young_Decellularized	10	E9QLK3;Q8C3R1;Q8C3R1-2	14331.8	9107.77	-0.654047	0.654047	-36.4505	0.635495	0	0.171248	0.100246	9	0.270499	E9QLK3;Q8C3R1;Q8C3R1-2	E9QLK3_MOUSE;BRAT1_MOUSE;BRAT1_MOUSE	BRCA1-associated ATM activator 1;BRCA1-associated ATM activator 1;Isoform 2 of BRCA1-associated ATM activator 1	Brat1	E9QLK3;Q8C3R1;Q8C3R1-2	Mus musculus	;positive regulation of protein phosphorylation,glucose metabolic process,apoptotic process,cellular response to DNA damage stimulus,cell proliferation,response to ionizing radiation,cell growth,cell migration,mitochondrion localization;	;;	;nucleus,nucleoplasm,cytoplasm,membrane;	tr;sp;sp	1;1;	1;1;	uniprot_mouse_proteome	>tr|E9QLK3|E9QLK3_MOUSE BRCA1-associated ATM activator 1 OS=Mus musculus GN=Brat1 PE=1 SV=1;>sp|Q8C3R1|BRAT1_MOUSE BRCA1-associated ATM activator 1 OS=Mus musculus GN=Brat1 PE=1 SV=1;>sp|Q8C3R1-2|BRAT1_MOUSE Isoform 2 of BRCA1-associated ATM activator 1 OS=Mus musculus GN=Brat1	2	2
TRUE	Old_Decellularized / Young_Decellularized	Old_Decellularized	Young_Decellularized	10	O54825	62575.6	31672.5	-0.982367	0.982367	-49.3851	0.506149	0	0.00046501	0.000893671	9	0.173976	O54825	BYST_MOUSE	Bystin	Bysl	O54825	Mus musculus	maturation of SSU-rRNA from tricistronic rRNA transcript (SSU-rRNA, 5.8S rRNA, LSU-rRNA),in utero embryonic development,blastocyst formation,trophectodermal cell differentiation,cell adhesion,cell proliferation	RNA binding	nucleus,nucleolus,cytoplasm,membrane,intracellular membrane-bounded organelle,apical part of cell	sp	1	3	uniprot_mouse_proteome	>sp|O54825|BYST_MOUSE Bystin OS=Mus musculus GN=Bysl PE=1 SV=3	2	2
TRUE	Old_Decellularized / Young_Decellularized	Old_Decellularized	Young_Decellularized	15	P24472	314494	329456	0.0670516	0.0670516	4.75736	1.04757	0	0.73805	0.295468	14	0.251598	P24472	GSTA4_MOUSE	Glutathione S-transferase A4	Gsta4	P24472	Mus musculus	glutathione metabolic process,xenobiotic metabolic process,response to herbicide,response to zinc ion,response to nicotine,cellular response to lithium ion	glutathione transferase activity,drug binding,glutathione binding	mitochondrion	sp	1	3	uniprot_mouse_proteome	>sp|P24472|GSTA4_MOUSE Glutathione S-transferase A4 OS=Mus musculus GN=Gsta4 PE=1 SV=3	2	3
TRUE	Old_Decellularized / Young_Decellularized	Old_Decellularized	Young_Decellularized	15	P40240	286098	247352	-0.209945	0.209945	-13.543	0.86457	0	0.677186	0.278361	14	0.273948	P40240	CD9_MOUSE	CD9 antigen	Cd9	P40240	Mus musculus	movement of cell or subcellular component,cell adhesion,cell surface receptor signaling pathway,fusion of sperm to egg plasma membrane,brain development,negative regulation of cell proliferation,response to water deprivation,oligodendrocyte development,paranodal junction assembly,receptor internalization,cellular response to low-density lipoprotein particle stimulus,negative regulation of platele…	integrin binding,protein binding	extracellular space,plasma membrane,integral component of plasma membrane,focal adhesion,external side of plasma membrane,membrane,apical plasma membrane,extracellular exosome,extracellular vesicle	sp	1	2	uniprot_mouse_proteome	>sp|P40240|CD9_MOUSE CD9 antigen OS=Mus musculus GN=Cd9 PE=1 SV=2	2	3
TRUE	Old_Decellularized / Young_Decellularized	Old_Decellularized	Young_Decellularized	10	P52623	192208	164418	-0.225301	0.225301	-14.4583	0.855417	0	0.453078	0.207947	9	0.167879	P52623	UCK1_MOUSE	Uridine-cytidine kinase 1	Uck1	P52623	Mus musculus	pyrimidine nucleobase metabolic process,phosphorylation,pyrimidine nucleoside salvage,UMP salvage,CTP salvage	uridine kinase activity,ATP binding,nucleoside kinase activity	cytosol	sp	1	2	uniprot_mouse_proteome	>sp|P52623|UCK1_MOUSE Uridine-cytidine kinase 1 OS=Mus musculus GN=Uck1 PE=1 SV=2	2	2
TRUE	Old_Decellularized / Young_Decellularized	Old_Decellularized	Young_Decellularized	15	P62631	18755872	13382189	-0.487028	0.487028	-28.6507	0.713493	0	0.137747	0.0848131	14	0.362811	P62631	EF1A2_MOUSE	Elongation factor 1-alpha 2	Eef1a2	P62631	Mus musculus	translational elongation,response to inorganic substance,positive regulation of apoptotic process,response to electrical stimulus,positive regulation of lipid kinase activity	translation elongation factor activity,GTPase activity,GTP binding,protein kinase binding	nucleus,cytoplasm,eukaryotic translation elongation factor 1 complex,neuronal cell body,myelin sheath	sp	1	1	uniprot_mouse_proteome	>sp|P62631|EF1A2_MOUSE Elongation factor 1-alpha 2 OS=Mus musculus GN=Eef1a2 PE=1 SV=1	2	3
TRUE	Old_Decellularized / Young_Decellularized	Old_Decellularized	Young_Decellularized	15	P62855	5.69143e+06	4.11178e+06	-0.469029	0.469029	-27.7549	0.722451	0	0.560506	0.24309	14	0.305366	P62855	RS26_MOUSE	40S ribosomal protein S26	Rps26	P62855	Mus musculus	translation,negative regulation of RNA splicing	RNA binding,mRNA binding,structural constituent of ribosome,cadherin binding	small ribosomal subunit,membrane,cytosolic small ribosomal subunit,extracellular exosome	sp	1	3	uniprot_mouse_proteome	>sp|P62855|RS26_MOUSE 40S ribosomal protein S26 OS=Mus musculus GN=Rps26 PE=1 SV=3	2	3
TRUE	Old_Decellularized / Young_Decellularized	Old_Decellularized	Young_Decellularized	10	P97770;P97770-2;P97770-3	86828.5	89902.8	0.0501961	0.0501961	3.54056	1.03541	0	0.950525	0.353258	9	0.0831951	P97770;P97770-2;P97770-3	THUM3_MOUSE	THUMP domain-containing protein 3;Isoform 2 of THUMP domain-containing protein 3;Isoform 3 of THUMP domain-containing protein 3	Thumpd3	P97770;P97770-2;P97770-3	Mus musculus	tRNA methylation;;	RNA binding,tRNA (guanine) methyltransferase activity;;	nucleolus,cytosol;;	sp	1;;	1;;	uniprot_mouse_proteome	>sp|P97770|THUM3_MOUSE THUMP domain-containing protein 3 OS=Mus musculus GN=Thumpd3 PE=1 SV=1;>sp|P97770-2|THUM3_MOUSE Isoform 2 of THUMP domain-containing protein 3 OS=Mus musculus GN=Thumpd3;>sp|P97770-3|THUM3_MOUSE Isoform 3 of THUMP domain-containing protein 3 OS=Mus musculus GN=Thumpd3	2	2
TRUE	Old_Decellularized / Young_Decellularized	Old_Decellularized	Young_Decellularized	10	Q00422	39674.3	35546.6	-0.158494	0.158494	-10.404	0.89596	0	0.311859	0.157532	9	0.151311	Q00422	GABPA_MOUSE	GA-binding protein alpha chain	Gabpa	Q00422	Mus musculus	negative regulation of transcription from RNA polymerase II promoter,in utero embryonic development,regulation of transcription from RNA polymerase II promoter,transcription from RNA polymerase II promoter,positive regulation of gene expression,negative regulation of megakaryocyte differentiation,positive regulation of transcription from RNA polymerase II promoter,cellular response to dopamine	RNA polymerase II core promoter proximal region sequence-specific DNA binding,transcriptional activator activity, RNA polymerase II core promoter proximal region sequence-specific binding,transcriptional activator activity, RNA polymerase II transcription regulatory region sequence-specific binding,DNA binding,chromatin binding,activating transcription factor binding,transcription regulatory regi…	nuclear chromatin,nucleus,nucleoplasm	sp	1	2	uniprot_mouse_proteome	>sp|Q00422|GABPA_MOUSE GA-binding protein alpha chain OS=Mus musculus GN=Gabpa PE=1 SV=2	2	2
TRUE	Old_Decellularized / Young_Decellularized	Old_Decellularized	Young_Decellularized	10	Q3U3G8;Q9EPB5	116273	109762	-0.0831283	0.0831283	-5.59916	0.944008	0	0.355859	0.173727	9	0.0885901	Q3U3G8;Q9EPB5	Q3U3G8_MOUSE;SERHL_MOUSE	Serine hydrolase-like protein	Serhl	Q3U3G8;Q9EPB5	Mus musculus	;	;hydrolase activity	;mitochondrion,peroxisome,cytoplasmic vesicle,perinuclear region of cytoplasm	tr;sp	1	1	uniprot_mouse_proteome	>tr|Q3U3G8|Q3U3G8_MOUSE Serine hydrolase-like protein OS=Mus musculus GN=Serhl PE=1 SV=1;>sp|Q9EPB5|SERHL_MOUSE Serine hydrolase-like protein OS=Mus musculus GN=Serhl PE=1 SV=1	2	2
TRUE	Old_Decellularized / Young_Decellularized	Old_Decellularized	Young_Decellularized	10	Q6IR34;Q6IR34-2;Q6IR34-3;Q6IR34-5	76225.3	53968.9	-0.498142	0.498142	-29.1982	0.708018	0	0.00688994	0.00854573	9	0.147153	Q6IR34;Q6IR34-2;Q6IR34-3;Q6IR34-5	GPSM1_MOUSE	G-protein-signaling modulator 1;Isoform 2 of G-protein-signaling modulator 1;Isoform 3 of G-protein-signaling modulator 1;Isoform 5 of G-protein-signaling modulator 1	Gpsm1	Q6IR34;Q6IR34-2;Q6IR34-3;Q6IR34-5	Mus musculus	nervous system development,positive regulation of macroautophagy,cell differentiation,negative regulation of GTPase activity,negative regulation of guanyl-nucleotide exchange factor activity;;;	GDP-dissociation inhibitor activity,protein binding;;;	nucleoplasm,Golgi apparatus,cytosol,plasma membrane,protein complex,Golgi membrane,endoplasmic reticulum membrane,cell cortex;;;	sp	1;;;	3;;;	uniprot_mouse_proteome	>sp|Q6IR34|GPSM1_MOUSE G-protein-signaling modulator 1 OS=Mus musculus GN=Gpsm1 PE=1 SV=3;>sp|Q6IR34-2|GPSM1_MOUSE Isoform 2 of G-protein-signaling modulator 1 OS=Mus musculus GN=Gpsm1;>sp|Q6IR34-3|GPSM1_MOUSE Isoform 3 of G-protein-signaling modulator 1 OS=Mus musculus GN=Gpsm1;>sp|Q6IR34-5|GPSM1_MOUSE Isoform 5 of G-protein-signaling modulator 1 OS=Mus musculus GN=Gpsm1	2	2
TRUE	Old_Decellularized / Young_Decellularized	Old_Decellularized	Young_Decellularized	10	Q6Q899;Q6Q899-2	473970	428723	-0.14475	0.14475	-9.54639	0.904536	0	0.756601	0.300366	9	0.310376	Q6Q899;Q6Q899-2	DDX58_MOUSE	Probable ATP-dependent RNA helicase DDX58;Isoform 2 of Probable ATP-dependent RNA helicase DDX58	Ddx58	Q6Q899;Q6Q899-2	Mus musculus	positive regulation of defense response to virus by host,detection of virus,response to virus,positive regulation of gene expression,regulation of cell migration,negative regulation of type I interferon production,positive regulation of granulocyte macrophage colony-stimulating factor production,positive regulation of interferon-alpha production,positive regulation of interferon-beta production,p…	double-stranded DNA binding,double-stranded RNA binding,single-stranded RNA binding,helicase activity,protein binding,ATP binding,zinc ion binding,ubiquitin protein ligase binding,identical protein binding;	cytoplasm,cytosol,bicellular tight junction,actin cytoskeleton,ruffle membrane;	sp	1;	2;	uniprot_mouse_proteome	>sp|Q6Q899|DDX58_MOUSE Probable ATP-dependent RNA helicase DDX58 OS=Mus musculus GN=Ddx58 PE=1 SV=2;>sp|Q6Q899-2|DDX58_MOUSE Isoform 2 of Probable ATP-dependent RNA helicase DDX58 OS=Mus musculus GN=Ddx58	2	2
TRUE	Old_Decellularized / Young_Decellularized	Old_Decellularized	Young_Decellularized	10	Q8BMC4	36630.1	23642.6	-0.631641	0.631641	-35.4558	0.645442	0	0.0143541	0.0151734	9	0.194673	Q8BMC4	NOP9_MOUSE	Nucleolar protein 9	Nop9	Q8BMC4	Mus musculus	biological_process	RNA binding	cellular_component	sp	1	1	uniprot_mouse_proteome	>sp|Q8BMC4|NOP9_MOUSE Nucleolar protein 9 OS=Mus musculus GN=Nop9 PE=1 SV=1	2	2
TRUE	Old_Decellularized / Young_Decellularized	Old_Decellularized	Young_Decellularized	10	Q8BU31	50817.7	47602.1	-0.0943067	0.0943067	-6.32777	0.936722	0	0.87101	0.332112	9	0.10593	Q8BU31	RAP2C_MOUSE	Ras-related protein Rap-2c	Rap2c	Q8BU31	Mus musculus	negative regulation of cell migration,positive regulation of protein autophosphorylation,Rap protein signal transduction,regulation of protein tyrosine kinase activity,establishment of endothelial intestinal barrier,regulation of nucleic acid-templated transcription	transcription coactivator activity,GTPase activity,GTP binding,GDP binding	cytoplasm,cytosol,plasma membrane,bicellular tight junction,membrane,cell-cell contact zone,recycling endosome,recycling endosome membrane,extracellular exosome	sp	1	1	uniprot_mouse_proteome	>sp|Q8BU31|RAP2C_MOUSE Ras-related protein Rap-2c OS=Mus musculus GN=Rap2c PE=1 SV=1	2	2
TRUE	Old_Decellularized / Young_Decellularized	Old_Decellularized	Young_Decellularized	15	Q8BVF7;Q8BVF7-2	150535	135240	-0.15457	0.15457	-10.16	0.8984	0	0.201122	0.112778	14	0.108816	Q8BVF7;Q8BVF7-2	APH1A_MOUSE	Gamma-secretase subunit APH-1A;Isoform 2 of Gamma-secretase subunit APH-1A	Aph1a	Q8BVF7;Q8BVF7-2	Mus musculus	metanephros development,membrane protein ectodomain proteolysis,Notch signaling pathway,Notch receptor processing,protein processing,membrane protein intracellular domain proteolysis,beta-amyloid formation,amyloid precursor protein metabolic process,amyloid precursor protein catabolic process,positive regulation of catalytic activity;	endopeptidase activity,protein binding,peptidase activity;	endoplasmic reticulum,endoplasmic reticulum membrane,Golgi apparatus,plasma membrane,integral component of plasma membrane,membrane,integral component of membrane,Golgi cisterna membrane,gamma-secretase complex;	sp	2;	2;	uniprot_mouse_proteome	>sp|Q8BVF7|APH1A_MOUSE Gamma-secretase subunit APH-1A OS=Mus musculus GN=Aph1a PE=2 SV=2;>sp|Q8BVF7-2|APH1A_MOUSE Isoform 2 of Gamma-secretase subunit APH-1A OS=Mus musculus GN=Aph1a	2	3
TRUE	Old_Decellularized / Young_Decellularized	Old_Decellularized	Young_Decellularized	10	Q8C1Y8	473968	397362	-0.254338	0.254338	-16.1628	0.838372	0	0.255056	0.134608	9	0.0783011	Q8C1Y8	CCZ1_MOUSE	Vacuolar fusion protein CCZ1 homolog	Ccz1	Q8C1Y8	Mus musculus	vesicle-mediated transport,positive regulation of GTPase activity	guanyl-nucleotide exchange factor activity	lysosomal membrane,cytosol,aggresome,vesicle,intracellular membrane-bounded organelle	sp	1	1	uniprot_mouse_proteome	>sp|Q8C1Y8|CCZ1_MOUSE Vacuolar fusion protein CCZ1 homolog OS=Mus musculus GN=Ccz1 PE=1 SV=1	2	2
TRUE	Old_Decellularized / Young_Decellularized	Old_Decellularized	Young_Decellularized	10	Q8K1A5	103896	103400	-0.0069097	0.0069097	-0.477798	0.995222	0	0.790165	0.309809	9	0.151128	Q8K1A5	TM41B_MOUSE	Transmembrane protein 41B	Tmem41b	Q8K1A5	Mus musculus	nervous system development,biological_process	molecular_function	cellular_component,integral component of membrane	sp	1	1	uniprot_mouse_proteome	>sp|Q8K1A5|TM41B_MOUSE Transmembrane protein 41B OS=Mus musculus GN=Tmem41b PE=1 SV=1	2	2
TRUE	Old_Decellularized / Young_Decellularized	Old_Decellularized	Young_Decellularized	10	Q91Z40	52531.4	58368.6	0.152013	0.152013	11.1118	1.11112	0	0.109007	0.0708822	9	0.171708	Q91Z40	Q91Z40_MOUSE	Gbp6 protein	Gbp7	Q91Z40	Mus musculus	defense response to protozoan,adhesion of symbiont to host,defense response to Gram-positive bacterium,cellular response to interferon-gamma	molecular_function,GTPase activity,GTP binding	symbiont-containing vacuole membrane,cytoplasmic vesicle	tr	1	2	uniprot_mouse_proteome	>tr|Q91Z40|Q91Z40_MOUSE Gbp6 protein OS=Mus musculus GN=Gbp7 PE=1 SV=2	2	2
TRUE	Old_Decellularized / Young_Decellularized	Old_Decellularized	Young_Decellularized	10	Q920Q8;Q920Q8-3;Q920Q8-4	217678	130141	-0.742121	0.742121	-40.214	0.59786	0	0.0006288	0.00116424	9	0.159002	Q920Q8;Q920Q8-3;Q920Q8-4	NS1BP_MOUSE	Influenza virus NS1A-binding protein homolog;Isoform 3 of Influenza virus NS1A-binding protein homolog;Isoform 4 of Influenza virus NS1A-binding protein homolog	Ivns1abp	Q920Q8;Q920Q8-3;Q920Q8-4	Mus musculus	negative regulation of intrinsic apoptotic signaling pathway;;	protein binding;;	nucleus,cytosol,actin cytoskeleton;;	sp	1;;	2;;	uniprot_mouse_proteome	>sp|Q920Q8|NS1BP_MOUSE Influenza virus NS1A-binding protein homolog OS=Mus musculus GN=Ivns1abp PE=1 SV=2;>sp|Q920Q8-3|NS1BP_MOUSE Isoform 3 of Influenza virus NS1A-binding protein homolog OS=Mus musculus GN=Ivns1abp;>sp|Q920Q8-4|NS1BP_MOUSE Isoform 4 of Influenza virus NS1A-binding protein homolog OS=Mus musculus GN=Ivns1abp	2	2
TRUE	Old_Decellularized / Young_Decellularized	Old_Decellularized	Young_Decellularized	10	Q99LU0	132754	176768	0.413097	0.413097	33.1541	1.33154	0	0.0126213	0.0137386	9	0.143649	Q99LU0	CH1B1_MOUSE	Charged multivesicular body protein 1b-1	Chmp1b1	Q99LU0	Mus musculus	cell separation after cytokinesis,nucleus organization,vacuolar transport,mitotic metaphase plate congression,regulation of centrosome duplication,protein transport,viral budding via host ESCRT complex,establishment of protein localization,cell division,regulation of mitotic spindle assembly	protein domain specific binding,identical protein binding	ESCRT III complex,nucleus,cytosol,endosome membrane,membrane coat,midbody,late endosome membrane,extracellular exosome	sp	1	1	uniprot_mouse_proteome	>sp|Q99LU0|CH1B1_MOUSE Charged multivesicular body protein 1b-1 OS=Mus musculus GN=Chmp1b1 PE=1 SV=1	2	2
TRUE	Old_Decellularized / Young_Decellularized	Old_Decellularized	Young_Decellularized	10	Q9CWL8	69585.7	56474.3	-0.301197	0.301197	-18.8421	0.811579	0	0.137314	0.0846185	9	0.162789	Q9CWL8	CTBL1_MOUSE	Beta-catenin-like protein 1	Ctnnbl1	Q9CWL8	Mus musculus	apoptotic process,somatic diversification of immunoglobulins,positive regulation of apoptotic process	protein binding,enzyme binding	Prp19 complex,nucleus,nucleoplasm,spliceosomal complex,membrane	sp	1	1	uniprot_mouse_proteome	>sp|Q9CWL8|CTBL1_MOUSE Beta-catenin-like protein 1 OS=Mus musculus GN=Ctnnbl1 PE=1 SV=1	2	2
TRUE	Old_Decellularized / Young_Decellularized	Old_Decellularized	Young_Decellularized	10	Q9QXF8	30110	11636.5	-1.37158	1.37158	-61.3532	0.386468	0	0.320575	0.160682	9	0.787949	Q9QXF8	GNMT_MOUSE	Glycine N-methyltransferase	Gnmt	Q9QXF8	Mus musculus	glycogen metabolic process,regulation of gluconeogenesis,methionine metabolic process,one-carbon metabolic process,methylation,S-adenosylmethionine metabolic process,protein homotetramerization	folic acid binding,glycine binding,glycine N-methyltransferase activity	cytosol	sp	1	3	uniprot_mouse_proteome	>sp|Q9QXF8|GNMT_MOUSE Glycine N-methyltransferase OS=Mus musculus GN=Gnmt PE=1 SV=3	2	2
TRUE	Old_Decellularized / Young_Decellularized	Old_Decellularized	Young_Decellularized	10	Q9WVB0;Q9WVB0-2;T1ECW4	63926.4	45114.3	-0.502826	0.502826	-29.4277	0.705723	0	0.0622574	0.0464812	9	0.171522	Q9WVB0;Q9WVB0-2;T1ECW4	RBPMS_MOUSE;RBPMS_MOUSE;T1ECW4_MOUSE	RNA-binding protein with multiple splicing;Isoform 2 of RNA-binding protein with multiple splicing;RNA-binding protein with multiple-splicing	Rbpms	Q9WVB0;Q9WVB0-2;T1ECW4	Mus musculus	mRNA splicing, via spliceosome,transcription, DNA-templated,regulation of transcription, DNA-templated,response to oxidative stress,positive regulation of pathway-restricted SMAD protein phosphorylation,positive regulation of SMAD protein import into nucleus;;	transcription coactivator activity,RNA binding,poly(A) binding,U1 snRNA binding,snRNA stem-loop binding,protein homodimerization activity;;	cytoplasmic mRNA processing body,nucleoplasm,U1 snRNP,cytosol,cytoplasmic stress granule;;	sp;sp;tr	1;;1	2;;1	uniprot_mouse_proteome	>sp|Q9WVB0|RBPMS_MOUSE RNA-binding protein with multiple splicing OS=Mus musculus GN=Rbpms PE=1 SV=2;>sp|Q9WVB0-2|RBPMS_MOUSE Isoform 2 of RNA-binding protein with multiple splicing OS=Mus musculus GN=Rbpms;>tr|T1ECW4|T1ECW4_MOUSE RNA-binding protein with multiple-splicing OS=Mus musculus GN=Rbpms PE=1 SV=1	2	2
TRUE	Old_Decellularized / Young_Decellularized	Old_Decellularized	Young_Decellularized	10	A0A087WRH2;Q9WUD8	76514.6	61844.8	-0.307081	0.307081	-19.1725	0.808275	0	0.995941	0.364437	9	0.304633	A0A087WRH2;Q9WUD8	A0A087WRH2_MOUSE;FAIM1_MOUSE	Fas apoptotic inhibitory molecule 1 (Fragment);Fas apoptotic inhibitory molecule 1	Faim	A0A087WRH2;Q9WUD8	Mus musculus	;apoptotic process,negative regulation of extrinsic apoptotic signaling pathway via death domain receptors	;	;cytoplasm	tr;sp	1	6;1	uniprot_mouse_proteome	>tr|A0A087WRH2|A0A087WRH2_MOUSE Fas apoptotic inhibitory molecule 1 (Fragment) OS=Mus musculus GN=Faim PE=1 SV=6;>sp|Q9WUD8|FAIM1_MOUSE Fas apoptotic inhibitory molecule 1 OS=Mus musculus GN=Faim PE=1 SV=1	2	2
TRUE	Old_Decellularized / Young_Decellularized	Old_Decellularized	Young_Decellularized	10	A0A0N4SUH4;Q8BKS9	70529.4	49169.7	-0.520454	0.520454	-30.2848	0.697152	0	0.0309712	0.0270951	9	0.249697	A0A0N4SUH4;Q8BKS9	A0A0N4SUH4_MOUSE;PUM3_MOUSE	Pumilio homolog 3	Pum3	A0A0N4SUH4;Q8BKS9	Mus musculus	;regulation of translation,regulation of protein ADP-ribosylation	;DNA binding,RNA binding,mRNA binding	;nucleoplasm,chromosome,nucleolus,endoplasmic reticulum	tr;sp	1	1;2	uniprot_mouse_proteome	>tr|A0A0N4SUH4|A0A0N4SUH4_MOUSE Pumilio homolog 3 OS=Mus musculus GN=Pum3 PE=1 SV=1;>sp|Q8BKS9|PUM3_MOUSE Pumilio homolog 3 OS=Mus musculus GN=Pum3 PE=1 SV=2	2	2
TRUE	Old_Decellularized / Young_Decellularized	Old_Decellularized	Young_Decellularized	10	A0A0R4J1C8;P31996;P31996-2	416580	824765	0.985389	0.985389	97.9847	1.97985	0	0.00123914	0.00206648	9	0.216135	A0A0R4J1C8;P31996;P31996-2	A0A0R4J1C8_MOUSE;CD68_MOUSE;CD68_MOUSE	Macrosialin;Macrosialin;Isoform Short of Macrosialin	Cd68	A0A0R4J1C8;P31996;P31996-2	Mus musculus	;cellular response to organic substance;	;;	;lysosomal membrane,plasma membrane,endosome membrane,integral component of membrane;	tr;sp;sp	1;1;	1;1;	uniprot_mouse_proteome	>tr|A0A0R4J1C8|A0A0R4J1C8_MOUSE Macrosialin OS=Mus musculus GN=Cd68 PE=1 SV=1;>sp|P31996|CD68_MOUSE Macrosialin OS=Mus musculus GN=Cd68 PE=1 SV=1;>sp|P31996-2|CD68_MOUSE Isoform Short of Macrosialin OS=Mus musculus GN=Cd68	2	2
TRUE	Old_Decellularized / Young_Decellularized	Old_Decellularized	Young_Decellularized	10	A0A0R4J256;P28076	36054.5	42489.1	0.23691	0.23691	17.8466	1.17847	0	0.109247	0.0710056	9	0.297696	A0A0R4J256;P28076	A0A0R4J256_MOUSE;PSB9_MOUSE	Proteasome subunit beta type;Proteasome subunit beta type-9	Psmb9	A0A0R4J256;P28076	Mus musculus	;antigen processing and presentation,proteolysis involved in cellular protein catabolic process,regulation of cysteine-type endopeptidase activity	;threonine-type endopeptidase activity	;nucleus,cytosol,proteasome core complex,proteasome core complex, beta-subunit complex,extracellular exosome,spermatoproteasome complex	tr;sp	1	1	uniprot_mouse_proteome	>tr|A0A0R4J256|A0A0R4J256_MOUSE Proteasome subunit beta type OS=Mus musculus GN=Psmb9 PE=1 SV=1;>sp|P28076|PSB9_MOUSE Proteasome subunit beta type-9 OS=Mus musculus GN=Psmb9 PE=1 SV=1	2	2
TRUE	Old_Decellularized / Young_Decellularized	Old_Decellularized	Young_Decellularized	10	A0A0X1KG66;A0A0X1KG67;Q3TAS6;Q3TAS6-2	48887.6	63978.8	0.388126	0.388126	30.8693	1.30869	0	0.109404	0.0710365	9	0.270605	A0A0X1KG66;A0A0X1KG67;Q3TAS6;Q3TAS6-2	A0A0X1KG66_MOUSE;A0A0X1KG67_MOUSE;EMC10_MOUSE;EMC10_MOUSE	ER membrane protein complex subunit 10;ER membrane protein complex subunit 10;ER membrane protein complex subunit 10;Isoform 2 of ER membrane protein complex subunit 10	Emc10	A0A0X1KG66;A0A0X1KG67;Q3TAS6;Q3TAS6-2	Mus musculus	;;biological_process;	;;molecular_function;	;;extracellular region,integral component of membrane,ER membrane protein complex;	tr;tr;sp;sp	1;1;2;	1;1;2;	uniprot_mouse_proteome	>tr|A0A0X1KG66|A0A0X1KG66_MOUSE ER membrane protein complex subunit 10 OS=Mus musculus GN=Emc10 PE=1 SV=1;>tr|A0A0X1KG67|A0A0X1KG67_MOUSE ER membrane protein complex subunit 10 OS=Mus musculus GN=Emc10 PE=1 SV=1;>sp|Q3TAS6|EMC10_MOUSE ER membrane protein complex subunit 10 OS=Mus musculus GN=Emc10 PE=2 SV=2;>sp|Q3TAS6-2|EMC10_MOUSE Isoform 2 of ER membrane protein complex subunit 10 OS=Mus muscul…	2	2
TRUE	Old_Decellularized / Young_Decellularized	Old_Decellularized	Young_Decellularized	10	A0A1C7CYV0;B1AX58;Q99K51	62301.1	58329	-0.0950463	0.0950463	-6.37578	0.936242	0	0.25262	0.133569	9	0.0714791	A0A1C7CYV0;B1AX58;Q99K51	A0A1C7CYV0_MOUSE;B1AX58_MOUSE;PLST_MOUSE	Plastin-3 (Fragment);Plastin-3;Plastin-3	Pls3	A0A1C7CYV0;B1AX58;Q99K51	Mus musculus	;;actin filament bundle assembly,actin filament network formation,actin crosslink formation,bone development	;;calcium ion binding,actin filament binding	;;cytoplasm,cytosol,actin filament,plasma membrane,actin filament bundle	tr;tr;sp	1	1;1;3	uniprot_mouse_proteome	>tr|A0A1C7CYV0|A0A1C7CYV0_MOUSE Plastin-3 (Fragment) OS=Mus musculus GN=Pls3 PE=1 SV=1;>tr|B1AX58|B1AX58_MOUSE Plastin-3 OS=Mus musculus GN=Pls3 PE=1 SV=1;>sp|Q99K51|PLST_MOUSE Plastin-3 OS=Mus musculus GN=Pls3 PE=1 SV=3	2	2
TRUE	Old_Decellularized / Young_Decellularized	Old_Decellularized	Young_Decellularized	10	B0R091;P61022	17640.9	48113.2	1.44751	1.44751	172.736	2.72736	0	0.0119086	0.013152	9	0.64862	B0R091;P61022	B0R091_MOUSE;CHP1_MOUSE	Calcineurin B homologous protein 1	Chp1	B0R091;P61022	Mus musculus	;microtubule bundle formation,negative regulation of protein phosphorylation,negative regulation of protein kinase activity,protein export from nucleus,negative regulation of phosphatase activity,calcium ion regulated exocytosis,membrane docking,cytoplasmic microtubule organization,negative regulation of protein ubiquitination,negative regulation of protein autophosphorylation,negative regulation…	;protein kinase inhibitor activity,transporter activity,calcium ion binding,microtubule binding,kinase binding,calcium-dependent protein binding	;Golgi membrane,nucleus,cytoplasm,endoplasmic reticulum,endoplasmic reticulum-Golgi intermediate compartment,cytosol,plasma membrane,focal adhesion,microtubule cytoskeleton,transport vesicle,extracellular exosome	tr;sp	1	1;2	uniprot_mouse_proteome	>tr|B0R091|B0R091_MOUSE Calcineurin B homologous protein 1 OS=Mus musculus GN=Chp1 PE=1 SV=1;>sp|P61022|CHP1_MOUSE Calcineurin B homologous protein 1 OS=Mus musculus GN=Chp1 PE=1 SV=2	2	2
TRUE	Old_Decellularized / Young_Decellularized	Old_Decellularized	Young_Decellularized	10	B1ARW4;Q99LY9	74768.1	59184.7	-0.337198	0.337198	-20.8423	0.791577	0	0.339353	0.16791	9	0.295243	B1ARW4;Q99LY9	B1ARW4_MOUSE;NDUS5_MOUSE	NADH dehydrogenase [ubiquinone] iron-sulfur protein 5 (Fragment);NADH dehydrogenase [ubiquinone] iron-sulfur protein 5	Ndufs5	B1ARW4;Q99LY9	Mus musculus	;mitochondrial respiratory chain complex I assembly,oxidation-reduction process	;molecular_function	;mitochondrion,mitochondrial respiratory chain complex I,mitochondrial intermembrane space	tr;sp	1	1;3	uniprot_mouse_proteome	>tr|B1ARW4|B1ARW4_MOUSE NADH dehydrogenase [ubiquinone] iron-sulfur protein 5 (Fragment) OS=Mus musculus GN=Ndufs5 PE=1 SV=1;>sp|Q99LY9|NDUS5_MOUSE NADH dehydrogenase [ubiquinone] iron-sulfur protein 5 OS=Mus musculus GN=Ndufs5 PE=1 SV=3	2	2
TRUE	Old_Decellularized / Young_Decellularized	Old_Decellularized	Young_Decellularized	10	B8JJM3;B8JJM5;B8JJN0;F6VQX8;F6W2T4;H3BK95;P04186	15254.7	19911.3	0.384333	0.384333	30.5256	1.30526	0	0.134474	0.0833738	9	0.42395	B8JJM3;B8JJM5;B8JJN0;F6VQX8;F6W2T4;H3BK95;P04186	B8JJM3_MOUSE;B8JJM5_MOUSE;B8JJN0_MOUSE;F6VQX8_MOUSE;F6W2T4_MOUSE;H3BK95_MOUSE;CFAB_MOUSE	Complement factor B (Fragment);Complement factor B;Protein Gm20547;Protein Gm20547 (Fragment);Complement factor B (Fragment);Complement factor B (Fragment);Complement factor B	Cfb;Cfb;Gm20547;Gm20547;Cfb;Cfb;Cfb	B8JJM3;B8JJM5;B8JJN0;F6VQX8;F6W2T4;H3BK95;P04186	Mus musculus	;;proteolysis;;;;proteolysis,complement activation, alternative pathway,cell proliferation	;;serine-type endopeptidase activity;;;;serine-type endopeptidase activity	;;;;;;extracellular space,extracellular exosome,blood microparticle	tr;tr;tr;tr;tr;tr;sp	3;3;3;3;3;3;1	1;1;1;1;1;1;2	uniprot_mouse_proteome	>tr|B8JJM3|B8JJM3_MOUSE Complement factor B (Fragment) OS=Mus musculus GN=Cfb PE=3 SV=1;>tr|B8JJM5|B8JJM5_MOUSE Complement factor B OS=Mus musculus GN=Cfb PE=3 SV=1;>tr|B8JJN0|B8JJN0_MOUSE Protein Gm20547 OS=Mus musculus GN=Gm20547 PE=3 SV=1;>tr|F6VQX8|F6VQX8_MOUSE Protein Gm20547 (Fragment) OS=Mus musculus GN=Gm20547 PE=3 SV=1;>tr|F6W2T4|F6W2T4_MOUSE Complement factor B (Fragment) OS=Mus musculu…	2	2
TRUE	Old_Decellularized / Young_Decellularized	Old_Decellularized	Young_Decellularized	10	D3YXU7;F8VQB6	21220.5	20891.8	-0.0225226	0.0225226	-1.54903	0.98451	0	0.96895	0.357589	9	0.291637	D3YXU7;F8VQB6	D3YXU7_MOUSE;MYO10_MOUSE	Unconventional myosin-X (Fragment);Unconventional myosin-X	Myo10	D3YXU7;F8VQB6	Mus musculus	;regulation of cell shape,positive regulation of cell-cell adhesion,cytoskeleton-dependent intracellular transport,cell motility,regulation of filopodium assembly	;motor activity,protein binding,calmodulin binding,ATP binding,phosphatidylinositol-3,4,5-trisphosphate binding,spectrin binding,actin-dependent ATPase activity,actin filament binding,plus-end directed microfilament motor activity	;ruffle,nucleolus,cytosol,plasma membrane,cell cortex,myosin complex,lamellipodium,filopodium,filopodium membrane,filopodium tip,neuron projection,neuronal cell body	tr;sp	1	1	uniprot_mouse_proteome	>tr|D3YXU7|D3YXU7_MOUSE Unconventional myosin-X (Fragment) OS=Mus musculus GN=Myo10 PE=1 SV=1;>sp|F8VQB6|MYO10_MOUSE Unconventional myosin-X OS=Mus musculus GN=Myo10 PE=1 SV=1	2	2
TRUE	Old_Decellularized / Young_Decellularized	Old_Decellularized	Young_Decellularized	10	D3Z508;D3Z6F4;D3Z709;E9QAR5;Q3UVU8;Q9D415;Q9D415-2;Q9D415-3;Q9D415-4;Q9D415-5	77934.6	74353.9	-0.0678562	0.0678562	-4.59454	0.954055	0	0.179382	0.103646	9	0.492943	D3Z508;D3Z6F4;D3Z709;E9QAR5;Q3UVU8;Q9D415;Q9D415-2;Q9D415-3;Q9D415-4;Q9D415-5	D3Z508_MOUSE;D3Z6F4_MOUSE;D3Z709_MOUSE;E9QAR5_MOUSE;Q3UVU8_MOUSE;DLGP1_MOUSE;DLGP1_MOUSE;DLGP1_MOUSE;DLGP1_MOUSE;DLGP1_MOUSE	Disks large-associated protein 1;Disks large-associated protein 1;Disks large-associated protein 1;Disks large-associated protein 1;Disks large-associated protein 1;Disks large-associated protein 1;Isoform 2 of Disks large-associated protein 1;Isoform 3 of Disks large-associated protein 1;Isoform 4 of Disks large-associated protein 1;Isoform 5 of Disks large-associated protein 1	Dlgap1	D3Z508;D3Z6F4;D3Z709;E9QAR5;Q3UVU8;Q9D415;Q9D415-2;Q9D415-3;Q9D415-4;Q9D415-5	Mus musculus	;;;;;protein complex assembly,chemical synaptic transmission;;;;	;;;;;protein domain specific binding;;;;	;;;;;postsynaptic density,cell junction,synapse,postsynaptic membrane;;;;	tr;tr;tr;tr;tr;sp;sp;sp;sp;sp	1;1;1;1;1;1;;;;	1;1;1;1;1;3;;;;	uniprot_mouse_proteome	>tr|D3Z508|D3Z508_MOUSE Disks large-associated protein 1 OS=Mus musculus GN=Dlgap1 PE=1 SV=1;>tr|D3Z6F4|D3Z6F4_MOUSE Disks large-associated protein 1 OS=Mus musculus GN=Dlgap1 PE=1 SV=1;>tr|D3Z709|D3Z709_MOUSE Disks large-associated protein 1 OS=Mus musculus GN=Dlgap1 PE=1 SV=1;>tr|E9QAR5|E9QAR5_MOUSE Disks large-associated protein 1 OS=Mus musculus GN=Dlgap1 PE=1 SV=1;>tr|Q3UVU8|Q3UVU8_MOUSE Dis…	2	2
TRUE	Old_Decellularized / Young_Decellularized	Old_Decellularized	Young_Decellularized	20	D6RI20;Q9CR20	298668	325127	0.122459	0.122459	8.85889	1.08859	0	0.874642	0.332997	19	0.275936	D6RI20;Q9CR20	D6RI20_MOUSE;IR3IP_MOUSE	Haloacid dehalogenase-like hydrolase domain-containing protein 2;Immediate early response 3-interacting protein 1	Hdhd2;Ier3ip1	D6RI20;Q9CR20	Mus musculus	;ER to Golgi vesicle-mediated transport,regulation of fibroblast apoptotic process	;molecular_function	;endoplasmic reticulum,endoplasmic reticulum membrane,Golgi apparatus,membrane,ER to Golgi transport vesicle,integral component of Golgi membrane	tr;sp	4;3	1	uniprot_mouse_proteome	>tr|D6RI20|D6RI20_MOUSE Haloacid dehalogenase-like hydrolase domain-containing protein 2 OS=Mus musculus GN=Hdhd2 PE=4 SV=1;>sp|Q9CR20|IR3IP_MOUSE Immediate early response 3-interacting protein 1 OS=Mus musculus GN=Ier3ip1 PE=3 SV=1	2	4
TRUE	Old_Decellularized / Young_Decellularized	Old_Decellularized	Young_Decellularized	10	E0CY07;Q9CR64;Q9CR64-2	612318	496561	-0.302309	0.302309	-18.9047	0.810953	0	0.0233447	0.0219298	9	0.111351	E0CY07;Q9CR64;Q9CR64-2	E0CY07_MOUSE;KISHA_MOUSE;KISHA_MOUSE	Protein kish;Protein kish-A;Isoform 2 of Protein kish-A	Tmem167;Tmem167a;Tmem167a	E0CY07;Q9CR64;Q9CR64-2	Mus musculus	;protein secretion,intracellular transport;	;molecular_function;	;Golgi membrane,endomembrane system,integral component of membrane;	tr;sp;sp	1;1;	1;1;	uniprot_mouse_proteome	>tr|E0CY07|E0CY07_MOUSE Protein kish OS=Mus musculus GN=Tmem167 PE=1 SV=1;>sp|Q9CR64|KISHA_MOUSE Protein kish-A OS=Mus musculus GN=Tmem167a PE=1 SV=1;>sp|Q9CR64-2|KISHA_MOUSE Isoform 2 of Protein kish-A OS=Mus musculus GN=Tmem167a	2	2
TRUE	Old_Decellularized / Young_Decellularized	Old_Decellularized	Young_Decellularized	10	E9PWH6;Q8BQM4	18068.6	6283.55	-1.52384	1.52384	-65.224	0.34776	0	0.00754156	0.00926294	9	0.398585	E9PWH6;Q8BQM4	E9PWH6_MOUSE;HEAT3_MOUSE	HEAT repeat-containing protein 3	Heatr3	E9PWH6;Q8BQM4	Mus musculus	;protein import into nucleus,ribosomal large subunit biogenesis	;unfolded protein binding	;cellular_component,intracellular	tr;sp	1	1	uniprot_mouse_proteome	>tr|E9PWH6|E9PWH6_MOUSE HEAT repeat-containing protein 3 OS=Mus musculus GN=Heatr3 PE=1 SV=1;>sp|Q8BQM4|HEAT3_MOUSE HEAT repeat-containing protein 3 OS=Mus musculus GN=Heatr3 PE=1 SV=1	2	2
TRUE	Old_Decellularized / Young_Decellularized	Old_Decellularized	Young_Decellularized	10	E9PZ92;Q3TPX4	45046.8	42520.3	-0.0832703	0.0832703	-5.60844	0.943916	0	0.34024	0.168174	9	0.150662	E9PZ92;Q3TPX4	E9PZ92_MOUSE;EXOC5_MOUSE	Exocyst complex component 5	Exoc5	E9PZ92;Q3TPX4	Mus musculus	;kidney development,exocytosis,Golgi to plasma membrane transport,protein transport,vesicle docking,membrane organization	;Ral GTPase binding,protein N-terminus binding	;exocyst,cytosol,midbody	tr;sp	1	1;2	uniprot_mouse_proteome	>tr|E9PZ92|E9PZ92_MOUSE Exocyst complex component 5 OS=Mus musculus GN=Exoc5 PE=1 SV=1;>sp|Q3TPX4|EXOC5_MOUSE Exocyst complex component 5 OS=Mus musculus GN=Exoc5 PE=1 SV=2	2	2
TRUE	Old_Decellularized / Young_Decellularized	Old_Decellularized	Young_Decellularized	10	E9Q0A4;F8VQE2;Q9QXL1	1.26094e+06	1.03064e+06	-0.290957	0.290957	-18.264	0.81736	0	0.211064	0.116839	9	0.203785	E9Q0A4;F8VQE2;Q9QXL1	E9Q0A4_MOUSE;F8VQE2_MOUSE;KI21B_MOUSE	Kinesin-like protein KIF21B	Kif21b	E9Q0A4;F8VQE2;Q9QXL1	Mus musculus	;;microtubule-based movement	;;microtubule motor activity,ATP binding,microtubule binding,ATPase activity	;;kinesin complex,microtubule,axon,dendrite,growth cone,cytoplasmic vesicle	tr;tr;sp	1	1;1;2	uniprot_mouse_proteome	>tr|E9Q0A4|E9Q0A4_MOUSE Kinesin-like protein KIF21B OS=Mus musculus GN=Kif21b PE=1 SV=1;>tr|F8VQE2|F8VQE2_MOUSE Kinesin-like protein KIF21B OS=Mus musculus GN=Kif21b PE=1 SV=1;>sp|Q9QXL1|KI21B_MOUSE Kinesin-like protein KIF21B OS=Mus musculus GN=Kif21b PE=1 SV=2	2	2
TRUE	Old_Decellularized / Young_Decellularized	Old_Decellularized	Young_Decellularized	10	E9Q1V3;F6TCT7;O35435	60700.9	69534.2	0.196003	0.196003	14.552	1.14552	0	0.313602	0.158188	9	0.339931	E9Q1V3;F6TCT7;O35435	E9Q1V3_MOUSE;F6TCT7_MOUSE;PYRD_MOUSE	Dihydroorotate dehydrogenase (quinone), mitochondrial;Dihydroorotate dehydrogenase (quinone), mitochondrial (Fragment);Dihydroorotate dehydrogenase (quinone), mitochondrial	Dhodh	E9Q1V3;F6TCT7;O35435	Mus musculus	;;'de novo' pyrimidine nucleobase biosynthetic process,female pregnancy,lactation,response to caffeine,response to drug,response to starvation,positive regulation of apoptotic process,'de novo' UMP biosynthetic process,oxidation-reduction process,regulation of mitochondrial fission,response to L-arginine	;;dihydroorotate dehydrogenase activity,drug binding,FMN binding,ubiquinone binding	;;nucleoplasm,mitochondrion,mitochondrial inner membrane,cytosol,integral component of membrane,neuronal cell body	tr;tr;sp	1	1;1;2	uniprot_mouse_proteome	>tr|E9Q1V3|E9Q1V3_MOUSE Dihydroorotate dehydrogenase (quinone), mitochondrial OS=Mus musculus GN=Dhodh PE=1 SV=1;>tr|F6TCT7|F6TCT7_MOUSE Dihydroorotate dehydrogenase (quinone), mitochondrial (Fragment) OS=Mus musculus GN=Dhodh PE=1 SV=1;>sp|O35435|PYRD_MOUSE Dihydroorotate dehydrogenase (quinone), mitochondrial OS=Mus musculus GN=Dhodh PE=1 SV=2	2	2
TRUE	Old_Decellularized / Young_Decellularized	Old_Decellularized	Young_Decellularized	15	E9QPX3;Q9CXZ1	401022	375276	-0.0957257	0.0957257	-6.41986	0.935801	0	0.614406	0.259742	14	0.143401	E9QPX3;Q9CXZ1	E9QPX3_MOUSE;NDUS4_MOUSE	NADH dehydrogenase [ubiquinone] iron-sulfur protein 4, mitochondrial;NADH dehydrogenase [ubiquinone] iron-sulfur protein 4, mitochondrial	Ndufs4	E9QPX3;Q9CXZ1	Mus musculus	;regulation of protein phosphorylation,brain development,cAMP-mediated signaling,electron transport chain,mitochondrial respiratory chain complex I assembly,cellular respiration,positive regulation of fibroblast proliferation,response to cAMP,reactive oxygen species metabolic process	;NADH dehydrogenase (ubiquinone) activity	;mitochondrion,mitochondrial respiratory chain complex I	tr;sp	1	1;3	uniprot_mouse_proteome	>tr|E9QPX3|E9QPX3_MOUSE NADH dehydrogenase [ubiquinone] iron-sulfur protein 4, mitochondrial OS=Mus musculus GN=Ndufs4 PE=1 SV=1;>sp|Q9CXZ1|NDUS4_MOUSE NADH dehydrogenase [ubiquinone] iron-sulfur protein 4, mitochondrial OS=Mus musculus GN=Ndufs4 PE=1 SV=3	2	3
TRUE	Old_Decellularized / Young_Decellularized	Old_Decellularized	Young_Decellularized	10	O54692	36671	20666.4	-0.827353	0.827353	-43.6438	0.563562	0	0.031731	0.0275905	9	0.213957	O54692	ZW10_MOUSE	Centromere/kinetochore protein zw10 homolog	Zw10	O54692	Mus musculus	mitotic sister chromatid segregation,establishment of mitotic spindle orientation,protein complex assembly,ER to Golgi vesicle-mediated transport,Golgi organization,mitotic metaphase plate congression,mitotic cell cycle checkpoint,mitotic spindle assembly checkpoint,regulation of exit from mitosis,protein transport,protein localization to kinetochore,cell division		kinetochore,condensed chromosome kinetochore,spindle pole,nucleus,endoplasmic reticulum,endoplasmic reticulum membrane,kinetochore microtubule,cytosol,membrane,Dsl1/NZR complex,RZZ complex	sp	1	3	uniprot_mouse_proteome	>sp|O54692|ZW10_MOUSE Centromere/kinetochore protein zw10 homolog OS=Mus musculus GN=Zw10 PE=1 SV=3	2	2
TRUE	Old_Decellularized / Young_Decellularized	Old_Decellularized	Young_Decellularized	10	P00920	101957	46301.9	-1.13881	1.13881	-54.5867	0.454133	0	0.00107365	0.00183356	9	0.279649	P00920	CAH2_MOUSE	Carbonic anhydrase 2	Ca2	P00920	Mus musculus	kidney development,morphogenesis of an epithelium,one-carbon metabolic process,regulation of pH,response to pH,response to zinc ion,carbon dioxide transport,positive regulation of synaptic transmission, GABAergic,positive regulation of cellular pH reduction,angiotensin-activated signaling pathway,odontogenesis of dentin-containing tooth,response to estrogen,regulation of anion transport,positive …	arylesterase activity,carbonate dehydratase activity,zinc ion binding	cytoplasm,cytosol,plasma membrane,microvillus,basolateral plasma membrane,axon,myelin sheath,apical part of cell,extracellular exosome	sp	1	4	uniprot_mouse_proteome	>sp|P00920|CAH2_MOUSE Carbonic anhydrase 2 OS=Mus musculus GN=Ca2 PE=1 SV=4	2	2
TRUE	Old_Decellularized / Young_Decellularized	Old_Decellularized	Young_Decellularized	10	P29595	100354	107433	0.0983298	0.0983298	7.05334	1.07053	0	0.0834198	0.0579994	9	1.03736	P29595	NEDD8_MOUSE	NEDD8	Nedd8	P29595	Mus musculus	regulation of transcription from RNA polymerase II promoter,protein localization,response to organic cyclic compound,protein neddylation	protein binding,ubiquitin protein ligase binding	nucleus,extracellular exosome	sp	1	2	uniprot_mouse_proteome	>sp|P29595|NEDD8_MOUSE NEDD8 OS=Mus musculus GN=Nedd8 PE=1 SV=2	2	2
TRUE	Old_Decellularized / Young_Decellularized	Old_Decellularized	Young_Decellularized	10	P43117	475236	718094	0.595528	0.595528	51.1026	1.51103	0	0.0033196	0.0046638	9	0.153012	P43117	PF2R_MOUSE	Prostaglandin F2-alpha receptor	Ptgfr	P43117	Mus musculus	G-protein coupled receptor signaling pathway,positive regulation of cell proliferation,positive regulation of gene expression,response to estradiol,response to lipopolysaccharide,calcium-mediated signaling using intracellular calcium source,negative regulation of apoptotic process,cellular response to prostaglandin D stimulus	prostaglandin F receptor activity	extracellular region,cytoplasm,plasma membrane,integral component of membrane	sp	2	1	uniprot_mouse_proteome	>sp|P43117|PF2R_MOUSE Prostaglandin F2-alpha receptor OS=Mus musculus GN=Ptgfr PE=2 SV=1	2	2
TRUE	Old_Decellularized / Young_Decellularized	Old_Decellularized	Young_Decellularized	10	P56183;P56183-2;P56183-3	9306052	4.91431e+06	-0.921179	0.921179	-47.1923	0.528077	0	0.56397	0.243662	9	0.278474	P56183;P56183-2;P56183-3	RRP1_MOUSE	Ribosomal RNA processing protein 1 homolog A;Isoform 2 of Ribosomal RNA processing protein 1 homolog A;Isoform 3 of Ribosomal RNA processing protein 1 homolog A	Rrp1	P56183;P56183-2;P56183-3	Mus musculus	rRNA processing;;	RNA binding;;	nucleus,nucleolus,preribosome, large subunit precursor,preribosome, small subunit precursor;;	sp	1;;	2;;	uniprot_mouse_proteome	>sp|P56183|RRP1_MOUSE Ribosomal RNA processing protein 1 homolog A OS=Mus musculus GN=Rrp1 PE=1 SV=2;>sp|P56183-2|RRP1_MOUSE Isoform 2 of Ribosomal RNA processing protein 1 homolog A OS=Mus musculus GN=Rrp1;>sp|P56183-3|RRP1_MOUSE Isoform 3 of Ribosomal RNA processing protein 1 homolog A OS=Mus musculus GN=Rrp1	2	2
TRUE	Old_Decellularized / Young_Decellularized	Old_Decellularized	Young_Decellularized	10	P62071	100959	117122	0.214242	0.214242	16.0095	1.16009	0	0.00312062	0.00444556	9	0.0636576	P62071	RRAS2_MOUSE	Ras-related protein R-Ras2	Rras2	P62071	Mus musculus	osteoblast differentiation,Ras protein signal transduction,cellular process,positive regulation of cell migration,regulation of neuron death	GTPase activity,protein binding,GTP binding	intracellular,plasma membrane,focal adhesion,membrane,extracellular exosome	sp	1	1	uniprot_mouse_proteome	>sp|P62071|RRAS2_MOUSE Ras-related protein R-Ras2 OS=Mus musculus GN=Rras2 PE=1 SV=1	2	2
TRUE	Old_Decellularized / Young_Decellularized	Old_Decellularized	Young_Decellularized	15	P62878	449325	390503	-0.202424	0.202424	-13.0911	0.869089	0	0.147796	0.0898592	14	0.117508	P62878	RBX1_MOUSE	E3 ubiquitin-protein ligase RBX1	Rbx1	P62878	Mus musculus	DNA repair,ubiquitin-dependent protein catabolic process,protein monoubiquitination,protein ubiquitination,protein catabolic process,SCF-dependent proteasomal ubiquitin-dependent protein catabolic process,positive regulation of proteasomal ubiquitin-dependent protein catabolic process,protein ubiquitination involved in ubiquitin-dependent protein catabolic process,proteasome-mediated ubiquitin-de…	ubiquitin-protein transferase activity,protein binding,transcription factor binding,eukaryotic initiation factor 4E binding,zinc ion binding,ligase activity,NEDD8 transferase activity,ubiquitin protein ligase binding,protein complex binding,ubiquitin-ubiquitin ligase activity,ubiquitin protein ligase activity,cullin family protein binding	ubiquitin ligase complex,nucleoplasm,anaphase-promoting complex,cytosol,SCF ubiquitin ligase complex,VCB complex,cullin-RING ubiquitin ligase complex,Cul2-RING ubiquitin ligase complex,Cul3-RING ubiquitin ligase complex,Cul4A-RING E3 ubiquitin ligase complex,Cul4B-RING E3 ubiquitin ligase complex,Cul5-RING ubiquitin ligase complex,Cul7-RING ubiquitin ligase complex,nuclear SCF ubiquitin ligase co…	sp	1	1	uniprot_mouse_proteome	>sp|P62878|RBX1_MOUSE E3 ubiquitin-protein ligase RBX1 OS=Mus musculus GN=Rbx1 PE=1 SV=1	2	3
TRUE	Old_Decellularized / Young_Decellularized	Old_Decellularized	Young_Decellularized	10	Q07456	49262.5	112219	1.18776	1.18776	127.798	2.27798	0	0.00270668	0.00395159	9	0.321813	Q07456	AMBP_MOUSE	Protein AMBP	Ambp	Q07456	Mus musculus	negative regulation of endopeptidase activity,protein-chromophore linkage,protein catabolic process,protein maturation	serine-type endopeptidase inhibitor activity,IgA binding,heme binding,small molecule binding,protein homodimerization activity	extracellular space,plasma membrane,cell surface,extracellular matrix,intracellular membrane-bounded organelle,extracellular exosome,blood microparticle	sp	1	2	uniprot_mouse_proteome	>sp|Q07456|AMBP_MOUSE Protein AMBP OS=Mus musculus GN=Ambp PE=1 SV=2	2	2
TRUE	Old_Decellularized / Young_Decellularized	Old_Decellularized	Young_Decellularized	10	Q561M1;Q9D358;Q9D358-2	1.48904e+06	1.01177e+06	-0.557496	0.557496	-32.052	0.67948	0	0.0880239	0.0603449	9	0.15782	Q561M1;Q9D358;Q9D358-2	Q561M1_MOUSE;PPAC_MOUSE;PPAC_MOUSE	Acp1 protein;Low molecular weight phosphotyrosine protein phosphatase;Isoform 2 of Low molecular weight phosphotyrosine protein phosphatase	Acp1	Q561M1;Q9D358;Q9D358-2	Mus musculus	;peptidyl-tyrosine dephosphorylation;	;acid phosphatase activity,non-membrane spanning protein tyrosine phosphatase activity,phosphatase activity;	;cytoplasm,cytosol,cytoplasmic side of plasma membrane,sarcolemma,extracellular exosome;	tr;sp;sp	1;1;	1;3;	uniprot_mouse_proteome	>tr|Q561M1|Q561M1_MOUSE Acp1 protein OS=Mus musculus GN=Acp1 PE=1 SV=1;>sp|Q9D358|PPAC_MOUSE Low molecular weight phosphotyrosine protein phosphatase OS=Mus musculus GN=Acp1 PE=1 SV=3;>sp|Q9D358-2|PPAC_MOUSE Isoform 2 of Low molecular weight phosphotyrosine protein phosphatase OS=Mus musculus GN=Acp1	2	2
TRUE	Old_Decellularized / Young_Decellularized	Old_Decellularized	Young_Decellularized	10	Q60972	24076.5	33247.9	0.465639	0.465639	38.0929	1.38093	0	0.100061	0.0666451	9	0.244711	Q60972	RBBP4_MOUSE	Histone-binding protein RBBP4	Rbbp4	Q60972	Mus musculus	chromatin silencing at rDNA,DNA replication,DNA replication-dependent nucleosome assembly,DNA replication-independent nucleosome assembly,chromatin remodeling,transcription, DNA-templated,cell cycle,chromatin modification,chromatin assembly,ATP-dependent chromatin remodeling,response to growth hormone	protein binding,histone deacetylase binding,RNA polymerase II core promoter proximal region sequence-specific DNA binding,RNA polymerase II distal enhancer sequence-specific DNA binding,DNA-dependent ATPase activity,nucleosomal DNA binding	nuclear chromatin,nucleus,nucleoplasm,cytosol,NuRD complex,NURF complex,CAF-1 complex,ESC/E(Z) complex,protein complex	sp	1	5	uniprot_mouse_proteome	>sp|Q60972|RBBP4_MOUSE Histone-binding protein RBBP4 OS=Mus musculus GN=Rbbp4 PE=1 SV=5	2	2
TRUE	Old_Decellularized / Young_Decellularized	Old_Decellularized	Young_Decellularized	10	Q61206	109009	108173	-0.0111047	0.0111047	-0.766761	0.992332	0	0.449171	0.206486	9	0.0964673	Q61206	PA1B2_MOUSE	Platelet-activating factor acetylhydrolase IB subunit beta	Pafah1b2	Q61206	Mus musculus	movement of cell or subcellular component,spermatogenesis,brain development,lipid catabolic process,positive regulation of macroautophagy	1-alkyl-2-acetylglycerophosphocholine esterase activity,protein binding,protein homodimerization activity,protein heterodimerization activity,platelet-activating factor acetyltransferase activity	fibrillar center,nucleolus,cytoplasm,cytosol,plasma membrane,extracellular exosome	sp	1	2	uniprot_mouse_proteome	>sp|Q61206|PA1B2_MOUSE Platelet-activating factor acetylhydrolase IB subunit beta OS=Mus musculus GN=Pafah1b2 PE=1 SV=2	2	2
TRUE	Old_Decellularized / Young_Decellularized	Old_Decellularized	Young_Decellularized	10	Q6P1E1;Q6P1E1-2	87771.8	66106.9	-0.408957	0.408957	-24.6832	0.753168	0	0.108054	0.0704476	9	0.148496	Q6P1E1;Q6P1E1-2	ZMIZ1_MOUSE	Zinc finger MIZ domain-containing protein 1;Isoform 2 of Zinc finger MIZ domain-containing protein 1	Zmiz1	Q6P1E1;Q6P1E1-2	Mus musculus	vasculogenesis,in utero embryonic development,heart morphogenesis,transcription, DNA-templated,vitellogenesis,cell aging,positive regulation of T cell differentiation,positive regulation of Notch signaling pathway,positive regulation of transcription from RNA polymerase II promoter,positive regulation of fibroblast proliferation,developmental growth,artery morphogenesis;	protein binding,zinc ion binding;	nucleoplasm,cytoplasm,nuclear speck,intracellular membrane-bounded organelle;	sp	2;	1;	uniprot_mouse_proteome	>sp|Q6P1E1|ZMIZ1_MOUSE Zinc finger MIZ domain-containing protein 1 OS=Mus musculus GN=Zmiz1 PE=2 SV=1;>sp|Q6P1E1-2|ZMIZ1_MOUSE Isoform 2 of Zinc finger MIZ domain-containing protein 1 OS=Mus musculus GN=Zmiz1	2	2
TRUE	Old_Decellularized / Young_Decellularized	Old_Decellularized	Young_Decellularized	10	Q8BGV8	106375	147284	0.469438	0.469438	38.457	1.38457	0	0.0490492	0.0386005	9	0.279468	Q8BGV8	MID51_MOUSE	Mitochondrial dynamics protein MID51	Mief1	Q8BGV8	Mus musculus	mitochondrial fission,cellular response to hypoxia,positive regulation of mitochondrial fission,positive regulation of protein targeting to membrane	protein binding,GDP binding,identical protein binding,ADP binding	mitochondrion,mitochondrial outer membrane,integral component of membrane	sp	1	1	uniprot_mouse_proteome	>sp|Q8BGV8|MID51_MOUSE Mitochondrial dynamics protein MID51 OS=Mus musculus GN=Mief1 PE=1 SV=1	2	2
TRUE	Old_Decellularized / Young_Decellularized	Old_Decellularized	Young_Decellularized	10	Q8BP92	42688	49546.6	0.214954	0.214954	16.0667	1.16067	0	0.0342056	0.0292429	9	0.0876089	Q8BP92	RCN2_MOUSE	Reticulocalbin-2	Rcn2	Q8BP92	Mus musculus		calcium ion binding,protein binding	nucleolus,endoplasmic reticulum,endoplasmic reticulum lumen	sp	1	1	uniprot_mouse_proteome	>sp|Q8BP92|RCN2_MOUSE Reticulocalbin-2 OS=Mus musculus GN=Rcn2 PE=1 SV=1	2	2
TRUE	Old_Decellularized / Young_Decellularized	Old_Decellularized	Young_Decellularized	10	Q8BPS4	81289.5	88524.1	0.123001	0.123001	8.8998	1.089	0	0.231207	0.124698	9	0.084626	Q8BPS4	GP180_MOUSE	Integral membrane protein GPR180	Gpr180	Q8BPS4	Mus musculus	G-protein coupled receptor signaling pathway,biological_process,response to pheromone	molecular_function	integral component of membrane,extracellular exosome	sp	1	1	uniprot_mouse_proteome	>sp|Q8BPS4|GP180_MOUSE Integral membrane protein GPR180 OS=Mus musculus GN=Gpr180 PE=1 SV=1	2	2
TRUE	Old_Decellularized / Young_Decellularized	Old_Decellularized	Young_Decellularized	10	Q8BWZ3;Q8BWZ3-2	85345.8	51087.6	-0.740349	0.740349	-40.1405	0.598595	0	0.0028241	0.00410935	9	0.267286	Q8BWZ3;Q8BWZ3-2	NAA25_MOUSE	N-alpha-acetyltransferase 25, NatB auxiliary subunit;Isoform 2 of N-alpha-acetyltransferase 25, NatB auxiliary subunit	Naa25	Q8BWZ3;Q8BWZ3-2	Mus musculus	N-terminal peptidyl-methionine acetylation;	peptide alpha-N-acetyltransferase activity;	cytoplasm,Golgi apparatus,cytosol,NatB complex;	sp	1;	1;	uniprot_mouse_proteome	>sp|Q8BWZ3|NAA25_MOUSE N-alpha-acetyltransferase 25, NatB auxiliary subunit OS=Mus musculus GN=Naa25 PE=1 SV=1;>sp|Q8BWZ3-2|NAA25_MOUSE Isoform 2 of N-alpha-acetyltransferase 25, NatB auxiliary subunit OS=Mus musculus GN=Naa25	2	2
TRUE	Old_Decellularized / Young_Decellularized	Old_Decellularized	Young_Decellularized	10	Q8C0M9	45988.2	62978.5	0.453595	0.453595	36.9449	1.36945	0	0.016873	0.017174	9	0.134022	Q8C0M9	ASGL1_MOUSE	Isoaspartyl peptidase/L-asparaginase	Asrgl1	Q8C0M9	Mus musculus	proteolysis,asparagine catabolic process via L-aspartate	asparaginase activity,beta-aspartyl-peptidase activity	nucleus,cytoplasm	sp	1	1	uniprot_mouse_proteome	>sp|Q8C0M9|ASGL1_MOUSE Isoaspartyl peptidase/L-asparaginase OS=Mus musculus GN=Asrgl1 PE=1 SV=1	2	2
TRUE	Old_Decellularized / Young_Decellularized	Old_Decellularized	Young_Decellularized	10	Q8C7J6	87454.5	108498	0.311058	0.311058	24.0618	1.24062	0	0.00724612	0.00893083	9	0.143764	Q8C7J6	Q8C7J6_MOUSE	Potassium channel tetramerisation domain containing 12b	Kctd12b	Q8C7J6	Mus musculus	regulation of G-protein coupled receptor protein signaling pathway,protein homooligomerization	molecular_function	receptor complex	tr	1	1	uniprot_mouse_proteome	>tr|Q8C7J6|Q8C7J6_MOUSE Potassium channel tetramerisation domain containing 12b OS=Mus musculus GN=Kctd12b PE=1 SV=1	2	2
TRUE	Old_Decellularized / Young_Decellularized	Old_Decellularized	Young_Decellularized	10	Q8VEH8	103714	82552.9	-0.329226	0.329226	-20.4037	0.795963	0	0.0501181	0.0392899	9	0.158429	Q8VEH8	ERLEC_MOUSE	Endoplasmic reticulum lectin 1	Erlec1	Q8VEH8	Mus musculus	ER-associated ubiquitin-dependent protein catabolic process,retrograde protein transport, ER to cytosol,negative regulation of retrograde protein transport, ER to cytosol	protein binding,unfolded protein binding	endoplasmic reticulum lumen	sp	1	1	uniprot_mouse_proteome	>sp|Q8VEH8|ERLEC_MOUSE Endoplasmic reticulum lectin 1 OS=Mus musculus GN=Erlec1 PE=1 SV=1	2	2
TRUE	Old_Decellularized / Young_Decellularized	Old_Decellularized	Young_Decellularized	10	Q9CPZ8	13527.7	24278	0.843734	0.843734	79.4689	1.79469	0	0.0546917	0.0421338	9	1.30344	Q9CPZ8	COXM1_MOUSE	COX assembly mitochondrial protein homolog	Cmc1	Q9CPZ8	Mus musculus	biological_process	molecular_function,metal ion binding	mitochondrion	sp	1	1	uniprot_mouse_proteome	>sp|Q9CPZ8|COXM1_MOUSE COX assembly mitochondrial protein homolog OS=Mus musculus GN=Cmc1 PE=1 SV=1	2	2
TRUE	Old_Decellularized / Young_Decellularized	Old_Decellularized	Young_Decellularized	10	Q9CQL5	151265	141669	-0.0945544	0.0945544	-6.34386	0.936561	0	0.517199	0.228782	9	0.104632	Q9CQL5	RM18_MOUSE	39S ribosomal protein L18, mitochondrial	Mrpl18	Q9CQL5	Mus musculus	translation,rRNA import into mitochondrion	structural constituent of ribosome,5S rRNA binding	extracellular space,mitochondrion,mitochondrial large ribosomal subunit	sp	1	1	uniprot_mouse_proteome	>sp|Q9CQL5|RM18_MOUSE 39S ribosomal protein L18, mitochondrial OS=Mus musculus GN=Mrpl18 PE=1 SV=1	2	2
TRUE	Old_Decellularized / Young_Decellularized	Old_Decellularized	Young_Decellularized	10	Q9D136	56103.5	57511	0.0357482	0.0357482	2.50883	1.02509	0	0.562525	0.243596	9	0.165208	Q9D136	OGFD3_MOUSE	2-oxoglutarate and iron-dependent oxygenase domain-containing protein 3	Ogfod3	Q9D136	Mus musculus	oxidation-reduction process	molecular_function,iron ion binding,oxidoreductase activity, acting on paired donors, with incorporation or reduction of molecular oxygen,L-ascorbic acid binding,dioxygenase activity	membrane,integral component of membrane,extracellular exosome	sp	2	1	uniprot_mouse_proteome	>sp|Q9D136|OGFD3_MOUSE 2-oxoglutarate and iron-dependent oxygenase domain-containing protein 3 OS=Mus musculus GN=Ogfod3 PE=2 SV=1	2	2
TRUE	Old_Decellularized / Young_Decellularized	Old_Decellularized	Young_Decellularized	10	Q9D1X9	73349.4	59740.5	-0.296076	0.296076	-18.5535	0.814465	0	0.100979	0.0670586	9	0.181108	Q9D1X9	TM50B_MOUSE	Transmembrane protein 50B	Tmem50b	Q9D1X9	Mus musculus			endoplasmic reticulum,plasma membrane,integral component of membrane	sp	1	1	uniprot_mouse_proteome	>sp|Q9D1X9|TM50B_MOUSE Transmembrane protein 50B OS=Mus musculus GN=Tmem50b PE=1 SV=1	2	2
TRUE	Old_Decellularized / Young_Decellularized	Old_Decellularized	Young_Decellularized	10	Q9D8K3;Q9D8K3-2	70793.4	9291.45	-2.92964	2.92964	-86.8753	0.131247	0	5.10708e-05	0.000135366	9	0.400474	Q9D8K3;Q9D8K3-2	DERL3_MOUSE	Derlin-3;Isoform 2 of Derlin-3	Derl3	Q9D8K3;Q9D8K3-2	Mus musculus	protein N-linked glycosylation via asparagine,ER-associated ubiquitin-dependent protein catabolic process,endoplasmic reticulum unfolded protein response,negative regulation of retrograde protein transport, ER to cytosol;	;	integral component of endoplasmic reticulum membrane,signal recognition particle receptor complex,signal recognition particle;	sp	1;	1;	uniprot_mouse_proteome	>sp|Q9D8K3|DERL3_MOUSE Derlin-3 OS=Mus musculus GN=Derl3 PE=1 SV=1;>sp|Q9D8K3-2|DERL3_MOUSE Isoform 2 of Derlin-3 OS=Mus musculus GN=Derl3	2	2
TRUE	Old_Decellularized / Young_Decellularized	Old_Decellularized	Young_Decellularized	10	Q9ERE7	308633	261670	-0.238141	0.238141	-15.2163	0.847837	0	0.0245867	0.0227667	9	0.144317	Q9ERE7	MESD_MOUSE	LDLR chaperone MESD	Mesdc2	Q9ERE7	Mus musculus	protein folding,phagocytosis,mesoderm development,Wnt signaling pathway,protein localization to cell surface,positive regulation of skeletal muscle acetylcholine-gated channel clustering	protein binding,identical protein binding,low-density lipoprotein particle receptor binding	endoplasmic reticulum,plasma membrane	sp	1	1	uniprot_mouse_proteome	>sp|Q9ERE7|MESD_MOUSE LDLR chaperone MESD OS=Mus musculus GN=Mesdc2 PE=1 SV=1	2	2
TRUE	Old_Decellularized / Young_Decellularized	Old_Decellularized	Young_Decellularized	10	Q9JJT0	80540.5	55751.9	-0.530693	0.530693	-30.7778	0.692222	0	0.00465124	0.00613568	9	0.13778	Q9JJT0	RCL1_MOUSE	RNA 3'-terminal phosphate cyclase-like protein	Rcl1	Q9JJT0	Mus musculus	endonucleolytic cleavage in ITS1 to separate SSU-rRNA from 5.8S rRNA and LSU-rRNA from tricistronic rRNA transcript (SSU-rRNA, 5.8S rRNA, LSU-rRNA),endonucleolytic cleavage in 5'-ETS of tricistronic rRNA transcript (SSU-rRNA, 5.8S rRNA, LSU-rRNA),rRNA processing	endoribonuclease activity,RNA-3'-phosphate cyclase activity	nucleolus	sp	2	1	uniprot_mouse_proteome	>sp|Q9JJT0|RCL1_MOUSE RNA 3'-terminal phosphate cyclase-like protein OS=Mus musculus GN=Rcl1 PE=2 SV=1	2	2
TRUE	Old_Decellularized / Young_Decellularized	Old_Decellularized	Young_Decellularized	10	Q9R1T4;Q9R1T4-2;Q9R1T4-3	48829.1	50441.8	0.046879	0.046879	3.30277	1.03303	0	0.184621	0.105887	9	0.158277	Q9R1T4;Q9R1T4-2;Q9R1T4-3	SEPT6_MOUSE	Septin-6;Isoform I of Septin-6;Isoform V of Septin-6	Sep6	Q9R1T4;Q9R1T4-2;Q9R1T4-3	Mus musculus	cell cycle,spermatogenesis,cell differentiation,cell division;;	protein binding,GTP binding;;	condensed chromosome kinetochore,spindle,septin ring,synaptic vesicle,midbody,septin complex,cleavage furrow,septin collar,axon terminus,sperm annulus;;	sp	1;;	4;;	uniprot_mouse_proteome	>sp|Q9R1T4|SEPT6_MOUSE Septin-6 OS=Mus musculus GN=Sept6 PE=1 SV=4;>sp|Q9R1T4-2|SEPT6_MOUSE Isoform I of Septin-6 OS=Mus musculus GN=Sept6;>sp|Q9R1T4-3|SEPT6_MOUSE Isoform V of Septin-6 OS=Mus musculus GN=Sept6	2	2
TRUE	Old_Decellularized / Young_Decellularized	Old_Decellularized	Young_Decellularized	20	A0A140LIU4;P56392	225404	410331	0.864274	0.864274	82.0424	1.82042	0	0.000115418	0.000272946	19	0.203296	A0A140LIU4;P56392	A0A140LIU4_MOUSE;CX7A1_MOUSE	Cytochrome c oxidase subunit 7A1, mitochondrial;Cytochrome c oxidase subunit 7A1, mitochondrial	Cox7a1	A0A140LIU4;P56392	Mus musculus	;hydrogen ion transmembrane transport	;cytochrome-c oxidase activity	;mitochondrion,mitochondrial respiratory chain,integral component of membrane	tr;sp	1	1	uniprot_mouse_proteome	>tr|A0A140LIU4|A0A140LIU4_MOUSE Cytochrome c oxidase subunit 7A1, mitochondrial OS=Mus musculus GN=Cox7a1 PE=1 SV=1;>sp|P56392|CX7A1_MOUSE Cytochrome c oxidase subunit 7A1, mitochondrial OS=Mus musculus GN=Cox7a1 PE=1 SV=1	2	4
TRUE	Old_Decellularized / Young_Decellularized	Old_Decellularized	Young_Decellularized	10	A1L341;Q61214	37441.2	39410.3	0.0739464	0.0739464	5.25921	1.05259	0	0.588863	0.251112	9	0.156857	A1L341;Q61214	A1L341_MOUSE;DYR1A_MOUSE	Dual-specificity tyrosine-phosphorylation-regulated kinase 1A;Dual specificity tyrosine-phosphorylation-regulated kinase 1A	Dyrk1a	A1L341;Q61214	Mus musculus	;regulation of alternative mRNA splicing, via spliceosome,protein phosphorylation,circadian rhythm,peptidyl-serine phosphorylation,peptidyl-threonine phosphorylation,peptidyl-tyrosine phosphorylation,negative regulation of DNA damage response, signal transduction by p53 class mediator,protein autophosphorylation,negative regulation of mRNA splicing, via spliceosome,positive regulation of protein …	;protein serine/threonine kinase activity,protein serine/threonine/tyrosine kinase activity,protein tyrosine kinase activity,non-membrane spanning protein tyrosine kinase activity,protein binding,ATP binding,identical protein binding,protein self-association,tau protein binding	;nucleus,nuclear speck,intracellular ribonucleoprotein complex	tr;sp	1	1	uniprot_mouse_proteome	>tr|A1L341|A1L341_MOUSE Dual-specificity tyrosine-phosphorylation-regulated kinase 1A OS=Mus musculus GN=Dyrk1a PE=1 SV=1;>sp|Q61214|DYR1A_MOUSE Dual specificity tyrosine-phosphorylation-regulated kinase 1A OS=Mus musculus GN=Dyrk1a PE=1 SV=1	2	2
TRUE	Old_Decellularized / Young_Decellularized	Old_Decellularized	Young_Decellularized	10	A2ASX1	366071	251218	-0.543182	0.543182	-31.3745	0.686255	0	0.000588933	0.00110212	9	0.105783	A2ASX1	A2ASX1_MOUSE	Growth factor receptor-bound protein 14 (Fragment)	Grb14	A2ASX1	Mus musculus				tr	1	1	uniprot_mouse_proteome	>tr|A2ASX1|A2ASX1_MOUSE Growth factor receptor-bound protein 14 (Fragment) OS=Mus musculus GN=Grb14 PE=1 SV=1	2	2
TRUE	Old_Decellularized / Young_Decellularized	Old_Decellularized	Young_Decellularized	10	A2AU52;Q8BG94	65368.6	60659.8	-0.107857	0.107857	-7.20343	0.927966	0	0.533806	0.234578	9	0.234566	A2AU52;Q8BG94	A2AU52_MOUSE;COMD7_MOUSE	COMM domain-containing protein 7	Commd7	A2AU52;Q8BG94	Mus musculus	;transcription, DNA-templated,negative regulation of NF-kappaB transcription factor activity,tumor necrosis factor-mediated signaling pathway,negative regulation of transcription, DNA-templated	;NF-kappaB binding	;cytoplasmic vesicle,intracellular membrane-bounded organelle,extracellular exosome	tr;sp	1	1	uniprot_mouse_proteome	>tr|A2AU52|A2AU52_MOUSE COMM domain-containing protein 7 OS=Mus musculus GN=Commd7 PE=1 SV=1;>sp|Q8BG94|COMD7_MOUSE COMM domain-containing protein 7 OS=Mus musculus GN=Commd7 PE=1 SV=1	2	2
TRUE	Old_Decellularized / Young_Decellularized	Old_Decellularized	Young_Decellularized	15	A2AUE1;G5E8T0;P60904	48321.3	84838.8	0.812064	0.812064	75.5722	1.75572	0	0.000222737	0.000481247	14	0.199617	A2AUE1;G5E8T0;P60904	A2AUE1_MOUSE;G5E8T0_MOUSE;DNJC5_MOUSE	DnaJ homolog subfamily C member 5 (Fragment);DnaJ (Hsp40) homolog, subfamily C, member 5, isoform CRA_b;DnaJ homolog subfamily C member 5	Dnajc5	A2AUE1;G5E8T0;P60904	Mus musculus	;;negative regulation of neuron apoptotic process	;;protein binding,ATP-dependent protein binding	;;mitochondrion,lysosomal membrane,plasma membrane,synaptic vesicle,membrane,melanosome,terminal bouton,extracellular exosome	tr;tr;sp	1	1	uniprot_mouse_proteome	>tr|A2AUE1|A2AUE1_MOUSE DnaJ homolog subfamily C member 5 (Fragment) OS=Mus musculus GN=Dnajc5 PE=1 SV=1;>tr|G5E8T0|G5E8T0_MOUSE DnaJ (Hsp40) homolog, subfamily C, member 5, isoform CRA_b OS=Mus musculus GN=Dnajc5 PE=1 SV=1;>sp|P60904|DNJC5_MOUSE DnaJ homolog subfamily C member 5 OS=Mus musculus GN=Dnajc5 PE=1 SV=1	2	3
TRUE	Old_Decellularized / Young_Decellularized	Old_Decellularized	Young_Decellularized	10	B2RQE8	176600	174089	-0.0206657	0.0206657	-1.42222	0.985778	0	0.286558	0.147787	9	0.150446	B2RQE8	RHG42_MOUSE	Rho GTPase-activating protein 42	Arhgap42	B2RQE8	Mus musculus	negative regulation of systemic arterial blood pressure,signal transduction,negative regulation of Rho protein signal transduction,activation of GTPase activity,negative regulation of vascular smooth muscle contraction	GTPase activator activity		sp	1	1	uniprot_mouse_proteome	>sp|B2RQE8|RHG42_MOUSE Rho GTPase-activating protein 42 OS=Mus musculus GN=Arhgap42 PE=1 SV=1	2	2
TRUE	Old_Decellularized / Young_Decellularized	Old_Decellularized	Young_Decellularized	10	D3YUP1;Q9WVG6;Q9WVG6-2	114020	77064.6	-0.565144	0.565144	-32.4112	0.675888	0	0.005646	0.00725333	9	0.13587	D3YUP1;Q9WVG6;Q9WVG6-2	D3YUP1_MOUSE;CARM1_MOUSE;CARM1_MOUSE	Histone-arginine methyltransferase CARM1;Histone-arginine methyltransferase CARM1;Isoform 2 of Histone-arginine methyltransferase CARM1	Carm1	D3YUP1;Q9WVG6;Q9WVG6-2	Mus musculus	;regulation of growth plate cartilage chondrocyte proliferation,transcription, DNA-templated,regulation of transcription, DNA-templated,protein methylation,aging,positive regulation of cell proliferation,histone methylation,peptidyl-arginine methylation, to asymmetrical-dimethyl arginine,intracellular steroid hormone receptor signaling pathway,intracellular estrogen receptor signaling pathway,neg…	;RNA polymerase II transcription coactivator activity,transcription coactivator activity,protein binding,protein methyltransferase activity,histone-arginine N-methyltransferase activity,protein-arginine N-methyltransferase activity,ligand-dependent nuclear receptor transcription coactivator activity,protein-arginine omega-N asymmetric methyltransferase activity,histone methyltransferase activity …	;nucleus,nucleoplasm,cytoplasm,cytosol,protein complex,RNA polymerase II transcription factor complex;	tr;sp;sp	1;1;	1;2;	uniprot_mouse_proteome	>tr|D3YUP1|D3YUP1_MOUSE Histone-arginine methyltransferase CARM1 OS=Mus musculus GN=Carm1 PE=1 SV=1;>sp|Q9WVG6|CARM1_MOUSE Histone-arginine methyltransferase CARM1 OS=Mus musculus GN=Carm1 PE=1 SV=2;>sp|Q9WVG6-2|CARM1_MOUSE Isoform 2 of Histone-arginine methyltransferase CARM1 OS=Mus musculus GN=Carm1	2	2
TRUE	Old_Decellularized / Young_Decellularized	Old_Decellularized	Young_Decellularized	10	D3YW09;G3UVU2	235569	178805	-0.397765	0.397765	-24.0966	0.759034	0	0.0331387	0.0286052	9	0.128752	D3YW09;G3UVU2	D3YW09_MOUSE;G3UVU2_MOUSE	Splicing factor 3A subunit 2	Sf3a2	D3YW09;G3UVU2	Mus musculus	;	;	;	tr	1	1	uniprot_mouse_proteome	>tr|D3YW09|D3YW09_MOUSE Splicing factor 3A subunit 2 OS=Mus musculus GN=Sf3a2 PE=1 SV=1;>tr|G3UVU2|G3UVU2_MOUSE Splicing factor 3A subunit 2 OS=Mus musculus GN=Sf3a2 PE=1 SV=1	2	2
TRUE	Old_Decellularized / Young_Decellularized	Old_Decellularized	Young_Decellularized	15	D3YZ00;P70257;P70257-1;P70257-2	106235	115468	0.120234	0.120234	8.6911	1.08691	0	0.112475	0.0725426	14	0.245556	D3YZ00;P70257;P70257-1;P70257-2	D3YZ00_MOUSE;NFIX_MOUSE;NFIX_MOUSE;NFIX_MOUSE	Nuclear factor 1 (Fragment);Nuclear factor 1 X-type;Isoform NFIX1 of Nuclear factor 1 X-type;Isoform NFIX2 of Nuclear factor 1 X-type	Nfix	D3YZ00;P70257;P70257-1;P70257-2	Mus musculus	;negative regulation of transcription from RNA polymerase II promoter,DNA replication,transcription from RNA polymerase II promoter,cerebellum development,cerebellar Purkinje cell layer development,cerebellar granule cell differentiation,positive regulation of transcription from RNA polymerase II promoter,astrocyte differentiation;;	;RNA polymerase II regulatory region sequence-specific DNA binding,transcriptional activator activity, RNA polymerase II transcription regulatory region sequence-specific binding;;	;nucleus,nucleoplasm;;	tr;sp;sp;sp	1;1;;	1;2;;	uniprot_mouse_proteome	>tr|D3YZ00|D3YZ00_MOUSE Nuclear factor 1 (Fragment) OS=Mus musculus GN=Nfix PE=1 SV=1;>sp|P70257|NFIX_MOUSE Nuclear factor 1 X-type OS=Mus musculus GN=Nfix PE=1 SV=2;>sp|P70257-1|NFIX_MOUSE Isoform NFIX1 of Nuclear factor 1 X-type OS=Mus musculus GN=Nfix;>sp|P70257-2|NFIX_MOUSE Isoform NFIX2 of Nuclear factor 1 X-type OS=Mus musculus GN=Nfix	2	3
TRUE	Old_Decellularized / Young_Decellularized	Old_Decellularized	Young_Decellularized	10	E0CYX9;Q3TC33	157295	189332	0.267441	0.267441	20.3671	1.20367	0	0.0306702	0.0268977	9	0.143728	E0CYX9;Q3TC33	E0CYX9_MOUSE;CC127_MOUSE	Coiled-coil domain-containing protein 127 (Fragment);Coiled-coil domain-containing protein 127	Ccdc127	E0CYX9;Q3TC33	Mus musculus	;biological_process	;molecular_function	;cellular_component	tr;sp	1	1;2	uniprot_mouse_proteome	>tr|E0CYX9|E0CYX9_MOUSE Coiled-coil domain-containing protein 127 (Fragment) OS=Mus musculus GN=Ccdc127 PE=1 SV=1;>sp|Q3TC33|CC127_MOUSE Coiled-coil domain-containing protein 127 OS=Mus musculus GN=Ccdc127 PE=1 SV=2	2	2
TRUE	Old_Decellularized / Young_Decellularized	Old_Decellularized	Young_Decellularized	15	O88207	902556	1.1024e+06	0.288559	0.288559	22.142	1.22142	0	0.38192	0.182942	14	0.133433	O88207	CO5A1_MOUSE	Collagen alpha-1(V) chain	Col5a1	O88207	Mus musculus	blood vessel development,heart morphogenesis,cell adhesion,cell migration,collagen fibril organization,collagen biosynthetic process,wound healing, spreading of epidermal cells,tendon development,skin development,integrin biosynthetic process,eye morphogenesis,regulation of cellular component organization,fibril organization,negative regulation of endodermal cell differentiation	extracellular matrix structural constituent,protein binding,heparin binding,proteoglycan binding,platelet-derived growth factor binding	proteinaceous extracellular matrix,collagen trimer,collagen type V trimer,basement membrane,extracellular space,extracellular matrix,extracellular exosome	sp	1	2	uniprot_mouse_proteome	>sp|O88207|CO5A1_MOUSE Collagen alpha-1(V) chain OS=Mus musculus GN=Col5a1 PE=1 SV=2	2	3
TRUE	Old_Decellularized / Young_Decellularized	Old_Decellularized	Young_Decellularized	10	O88851	231842	221008	-0.0690431	0.0690431	-4.673	0.95327	0	0.261203	0.137265	9	0.230671	O88851	RBBP9_MOUSE	Putative hydrolase RBBP9	Rbbp9	O88851	Mus musculus	regulation of cell proliferation	molecular_function,hydrolase activity	nucleoplasm,cytoplasm,extracellular exosome	sp	1	2	uniprot_mouse_proteome	>sp|O88851|RBBP9_MOUSE Putative hydrolase RBBP9 OS=Mus musculus GN=Rbbp9 PE=1 SV=2	2	2
TRUE	Old_Decellularized / Young_Decellularized	Old_Decellularized	Young_Decellularized	10	P01029	40880.4	66618.8	0.704521	0.704521	62.9604	1.6296	0	0.00186754	0.002901	9	0.156974	P01029	CO4B_MOUSE	Complement C4-B	C4b	P01029	Mus musculus	inflammatory response,complement activation,complement activation, classical pathway,negative regulation of endopeptidase activity,immunoglobulin mediated immune response,innate immune response	complement binding,complement component C1q binding,endopeptidase inhibitor activity,carbohydrate binding	extracellular space,cell junction,axon,dendrite,neuronal cell body,other organism cell,synapse,extracellular exosome,blood microparticle	sp	1	3	uniprot_mouse_proteome	>sp|P01029|CO4B_MOUSE Complement C4-B OS=Mus musculus GN=C4b PE=1 SV=3	2	2
TRUE	Old_Decellularized / Young_Decellularized	Old_Decellularized	Young_Decellularized	10	P20060	143280	146317	0.0302581	0.0302581	2.11948	1.02119	0	0.418672	0.196404	9	0.336018	P20060	HEXB_MOUSE	Beta-hexosaminidase subunit beta	Hexb	P20060	Mus musculus	skeletal system development,glycosphingolipid metabolic process,ganglioside catabolic process,cellular calcium ion homeostasis,lysosome organization,single fertilization,penetration of zona pellucida,sensory perception of sound,locomotory behavior,male courtship behavior,regulation of cell shape,phospholipid biosynthetic process,oligosaccharide catabolic process,lipid storage,sexual reproduction,…	beta-N-acetylhexosaminidase activity,acetylglucosaminyltransferase activity,hydrolase activity,protein homodimerization activity,protein heterodimerization activity,Requires Ontology	acrosomal vesicle,extracellular space,lysosome,membrane,azurophil granule,extracellular exosome	sp	1	2	uniprot_mouse_proteome	>sp|P20060|HEXB_MOUSE Beta-hexosaminidase subunit beta OS=Mus musculus GN=Hexb PE=1 SV=2	2	2
TRUE	Old_Decellularized / Young_Decellularized	Old_Decellularized	Young_Decellularized	15	P39039	204138	201628	-0.0178494	0.0178494	-1.22961	0.987704	0	0.496609	0.222553	14	0.169695	P39039	MBL1_MOUSE	Mannose-binding protein A	Mbl1	P39039	Mus musculus	complement activation, lectin pathway,complement activation, classical pathway,negative regulation of growth of symbiont in host,positive regulation of phagocytosis,defense response to Gram-positive bacterium,killing by host of symbiont cells	calcium ion binding,mannose binding	collagen trimer,extracellular space	sp	1	1	uniprot_mouse_proteome	>sp|P39039|MBL1_MOUSE Mannose-binding protein A OS=Mus musculus GN=Mbl1 PE=1 SV=1	2	3
TRUE	Old_Decellularized / Young_Decellularized	Old_Decellularized	Young_Decellularized	20	P48771	946217	1.2836e+06	0.439949	0.439949	35.6556	1.35656	0	2.78837e-06	1.08344e-05	19	0.0990247	P48771	CX7A2_MOUSE	Cytochrome c oxidase subunit 7A2, mitochondrial	Cox7a2	P48771	Mus musculus	biological_process,hydrogen ion transmembrane transport	molecular_function,cytochrome-c oxidase activity	mitochondrion,mitochondrial inner membrane,mitochondrial respiratory chain,extracellular exosome	sp	1	2	uniprot_mouse_proteome	>sp|P48771|CX7A2_MOUSE Cytochrome c oxidase subunit 7A2, mitochondrial OS=Mus musculus GN=Cox7a2 PE=1 SV=2	2	4
TRUE	Old_Decellularized / Young_Decellularized	Old_Decellularized	Young_Decellularized	10	Q3UDR8	211262	198245	-0.0917482	0.0917482	-6.16151	0.938385	0	0.286686	0.1478	9	0.0680179	Q3UDR8	YIPF3_MOUSE	Protein YIPF3	Yipf3	Q3UDR8	Mus musculus	biological_process,cell differentiation	molecular_function	Golgi apparatus,plasma membrane,integral component of membrane,transport vesicle,intracellular membrane-bounded organelle	sp	1	1	uniprot_mouse_proteome	>sp|Q3UDR8|YIPF3_MOUSE Protein YIPF3 OS=Mus musculus GN=Yipf3 PE=1 SV=1	2	2
TRUE	Old_Decellularized / Young_Decellularized	Old_Decellularized	Young_Decellularized	10	Q3URV1;Q3URV1-2	327094	384563	0.233514	0.233514	17.5695	1.1757	0	0.532771	0.234196	9	0.368224	Q3URV1;Q3URV1-2	BROMI_MOUSE	Protein broad-minded;Isoform 2 of Protein broad-minded	Tbc1d32	Q3URV1;Q3URV1-2	Mus musculus	lens development in camera-type eye,retinal pigment epithelium development,smoothened signaling pathway,determination of left/right symmetry,heart development,neural tube development,axoneme assembly,embryonic digit morphogenesis,camera-type eye development,retina development in camera-type eye,smoothened signaling pathway involved in dorsal/ventral neural tube patterning,protein localization to …	protein binding;	cellular_component,cytoplasm,cilium;	sp	1;	2;	uniprot_mouse_proteome	>sp|Q3URV1|BROMI_MOUSE Protein broad-minded OS=Mus musculus GN=Tbc1d32 PE=1 SV=2;>sp|Q3URV1-2|BROMI_MOUSE Isoform 2 of Protein broad-minded OS=Mus musculus GN=Tbc1d32	2	2
TRUE	Old_Decellularized / Young_Decellularized	Old_Decellularized	Young_Decellularized	10	Q5SRX1;Q5SRX1-2;Q5SRX1-3;Q5SRX1-4;Q5SRX1-5	19165.3	18926.1	-0.0181205	0.0181205	-1.24816	0.987518	0	0.719649	0.290385	9	0.167572	Q5SRX1;Q5SRX1-2;Q5SRX1-3;Q5SRX1-4;Q5SRX1-5	TM1L2_MOUSE	TOM1-like protein 2;Isoform 2 of TOM1-like protein 2;Isoform 3 of TOM1-like protein 2;Isoform 4 of TOM1-like protein 2;Isoform 5 of TOM1-like protein 2	Tom1l2	Q5SRX1;Q5SRX1-2;Q5SRX1-3;Q5SRX1-4;Q5SRX1-5	Mus musculus	intracellular protein transport,signal transduction,negative regulation of mitotic nuclear division;;;;	protein kinase binding,clathrin binding;;;;	intracellular,extracellular exosome;;;;	sp	1;;;;	1;;;;	uniprot_mouse_proteome	>sp|Q5SRX1|TM1L2_MOUSE TOM1-like protein 2 OS=Mus musculus GN=Tom1l2 PE=1 SV=1;>sp|Q5SRX1-2|TM1L2_MOUSE Isoform 2 of TOM1-like protein 2 OS=Mus musculus GN=Tom1l2;>sp|Q5SRX1-3|TM1L2_MOUSE Isoform 3 of TOM1-like protein 2 OS=Mus musculus GN=Tom1l2;>sp|Q5SRX1-4|TM1L2_MOUSE Isoform 4 of TOM1-like protein 2 OS=Mus musculus GN=Tom1l2;>sp|Q5SRX1-5|TM1L2_MOUSE Isoform 5 of TOM1-like protein 2 OS=Mus mus…	2	2
TRUE	Old_Decellularized / Young_Decellularized	Old_Decellularized	Young_Decellularized	10	Q61334	100814	104633	0.053644	0.053644	3.78831	1.03788	0	0.22863	0.123776	9	0.0941113	Q61334	BAP29_MOUSE	B-cell receptor-associated protein 29	Bcap29	Q61334	Mus musculus	osteoblast differentiation,intracellular protein transport,ER to Golgi vesicle-mediated transport,apoptotic process,protein localization to endoplasmic reticulum exit site		endoplasmic reticulum membrane,membrane,integral component of membrane	sp	1	1	uniprot_mouse_proteome	>sp|Q61334|BAP29_MOUSE B-cell receptor-associated protein 29 OS=Mus musculus GN=Bcap29 PE=1 SV=1	2	2
TRUE	Old_Decellularized / Young_Decellularized	Old_Decellularized	Young_Decellularized	10	Q8VDI9	123657	115112	-0.103305	0.103305	-6.91021	0.930898	0	0.170766	0.100128	9	0.077344	Q8VDI9	ALG9_MOUSE	Alpha-1,2-mannosyltransferase ALG9	Alg9	Q8VDI9	Mus musculus	protein glycosylation,mannosylation	mannosyltransferase activity,dol-P-Man:Man(8)GlcNAc(2)-PP-Dol alpha-1,2-mannosyltransferase activity,dol-P-Man:Man(6)GlcNAc(2)-PP-Dol alpha-1,2-mannosyltransferase activity	endoplasmic reticulum,endoplasmic reticulum membrane,membrane,integral component of membrane	sp	2	1	uniprot_mouse_proteome	>sp|Q8VDI9|ALG9_MOUSE Alpha-1,2-mannosyltransferase ALG9 OS=Mus musculus GN=Alg9 PE=2 SV=1	2	2
TRUE	Old_Decellularized / Young_Decellularized	Old_Decellularized	Young_Decellularized	15	Q91XE8	1814114	2.2052e+06	0.281644	0.281644	21.5579	1.21558	0	0.000447631	0.000868465	14	0.0720576	Q91XE8	TM205_MOUSE	Transmembrane protein 205	Tmem205	Q91XE8	Mus musculus	biological_process	molecular_function	integral component of membrane,extracellular exosome	sp	1	1	uniprot_mouse_proteome	>sp|Q91XE8|TM205_MOUSE Transmembrane protein 205 OS=Mus musculus GN=Tmem205 PE=1 SV=1	2	3
TRUE	Old_Decellularized / Young_Decellularized	Old_Decellularized	Young_Decellularized	10	Q99LT0	118337	100398	-0.237169	0.237169	-15.1591	0.848409	0	0.109402	0.0710365	9	0.276929	Q99LT0	DPY30_MOUSE	Protein dpy-30 homolog	Dpy30	Q99LT0	Mus musculus	chromatin silencing at telomere,transcription, DNA-templated,endosomal transport,histone H3-K4 methylation	identical protein binding,protein homodimerization activity,histone methyltransferase activity (H3-K4 specific)	chromosome, telomeric region,nucleus,nucleoplasm,Golgi apparatus,trans-Golgi network,histone methyltransferase complex,MLL3/4 complex,Set1C/COMPASS complex	sp	1	1	uniprot_mouse_proteome	>sp|Q99LT0|DPY30_MOUSE Protein dpy-30 homolog OS=Mus musculus GN=Dpy30 PE=1 SV=1	2	2
TRUE	Old_Decellularized / Young_Decellularized	Old_Decellularized	Young_Decellularized	10	Q9D1J3	62395.1	66831.5	0.0990971	0.0990971	7.11029	1.0711	0	0.493917	0.221416	9	0.155077	Q9D1J3	SARNP_MOUSE	SAP domain-containing ribonucleoprotein	Sarnp	Q9D1J3	Mus musculus	negative regulation of transcription from RNA polymerase II promoter,transcription, DNA-templated,mRNA export from nucleus,regulation of translation	RNA polymerase II core promoter proximal region sequence-specific DNA binding,transcriptional repressor activity, RNA polymerase II core promoter proximal region sequence-specific binding,RNA binding,protein binding,protein C-terminus binding,RS domain binding	transcription export complex,nucleus,nuclear speck,cytoplasmic ribonucleoprotein granule	sp	1	3	uniprot_mouse_proteome	>sp|Q9D1J3|SARNP_MOUSE SAP domain-containing ribonucleoprotein OS=Mus musculus GN=Sarnp PE=1 SV=3	2	2
TRUE	Old_Decellularized / Young_Decellularized	Old_Decellularized	Young_Decellularized	15	Q9D328	808414	812027	0.00643317	0.00643317	0.446909	1.00447	0	0.876447	0.333184	14	0.256678	Q9D328	TM35A_MOUSE	Transmembrane protein 35A	Tmem35a	Q9D328	Mus musculus	biological_process	molecular_function	cellular_component,peroxisomal membrane,integral component of membrane,cytoplasmic vesicle	sp	1	1	uniprot_mouse_proteome	>sp|Q9D328|TM35A_MOUSE Transmembrane protein 35A OS=Mus musculus GN=Tmem35a PE=1 SV=1	2	3
TRUE	Old_Decellularized / Young_Decellularized	Old_Decellularized	Young_Decellularized	10	Q9D4H8	113864	92963.2	-0.292584	0.292584	-18.3562	0.816438	0	0.0394905	0.0327223	9	0.129221	Q9D4H8	CUL2_MOUSE	Cullin-2	Cul2	Q9D4H8	Mus musculus	protein catabolic process,protein ubiquitination involved in ubiquitin-dependent protein catabolic process	protein binding,ubiquitin protein ligase binding,protein complex binding,ubiquitin protein ligase activity	nucleoplasm,nucleolus,VCB complex,Cul2-RING ubiquitin ligase complex	sp	1	2	uniprot_mouse_proteome	>sp|Q9D4H8|CUL2_MOUSE Cullin-2 OS=Mus musculus GN=Cul2 PE=1 SV=2	2	2
TRUE	Old_Decellularized / Young_Decellularized	Old_Decellularized	Young_Decellularized	10	Q9DCN1	38971	76336.8	0.969977	0.969977	95.8809	1.95881	0	0.00124725	0.00207271	9	0.253338	Q9DCN1	NUD12_MOUSE	Peroxisomal NADH pyrophosphatase NUDT12	Nudt12	Q9DCN1	Mus musculus	NADP catabolic process,NAD catabolic process	NAD+ diphosphatase activity,NADH pyrophosphatase activity,metal ion binding	nucleus,cytoplasm,peroxisome	sp	1	1	uniprot_mouse_proteome	>sp|Q9DCN1|NUD12_MOUSE Peroxisomal NADH pyrophosphatase NUDT12 OS=Mus musculus GN=Nudt12 PE=1 SV=1	2	2
TRUE	Old_Decellularized / Young_Decellularized	Old_Decellularized	Young_Decellularized	10	Q9QZC8	29106.8	42005.8	0.529233	0.529233	44.3161	1.44316	0	0.11006	0.0713389	9	0.422867	Q9QZC8	ABHD1_MOUSE	Protein ABHD1	Abhd1	Q9QZC8	Mus musculus	cellular lipid metabolic process	lipase activity,carboxylic ester hydrolase activity	cellular_component,integral component of membrane	sp	1	2	uniprot_mouse_proteome	>sp|Q9QZC8|ABHD1_MOUSE Protein ABHD1 OS=Mus musculus GN=Abhd1 PE=1 SV=2	2	2
TRUE	Old_Decellularized / Young_Decellularized	Old_Decellularized	Young_Decellularized	10	A0A0G2JDM0;A0A0G2JDN9;A0A0G2JGV7;A0A140T8R8;A0A1B0GXL7;Q3UT23;Q9QZ73	23035	23997.3	0.0590459	0.0590459	4.17766	1.04178	0	0.968527	0.357589	9	0.267077	A0A0G2JDM0;A0A0G2JDN9;A0A0G2JGV7;A0A140T8R8;A0A1B0GXL7;Q3UT23;Q9QZ73	A0A0G2JDM0_MOUSE;A0A0G2JDN9_MOUSE;A0A0G2JGV7_MOUSE;A0A140T8R8_MOUSE;A0A1B0GXL7_MOUSE;Q3UT23_MOUSE;DCNL1_MOUSE	DCN1-like protein 1 (Fragment);DCN1-like protein 1 (Fragment);DCN1-like protein (Fragment);DCN1-like protein (Fragment);DCN1-like protein 1 (Fragment);DCN1-like protein;DCN1-like protein 1	Dcun1d1	A0A0G2JDM0;A0A0G2JDN9;A0A0G2JGV7;A0A140T8R8;A0A1B0GXL7;Q3UT23;Q9QZ73	Mus musculus	;;;;;;protein neddylation,positive regulation of ubiquitin-protein transferase activity	;;;;;;ubiquitin conjugating enzyme binding,ubiquitin-like protein binding,cullin family protein binding	;;;;;;ubiquitin ligase complex,nucleus,cytosol	tr;tr;tr;tr;tr;tr;sp	1	1;4;1;1;1;1;1	uniprot_mouse_proteome	>tr|A0A0G2JDM0|A0A0G2JDM0_MOUSE DCN1-like protein 1 (Fragment) OS=Mus musculus GN=Dcun1d1 PE=1 SV=1;>tr|A0A0G2JDN9|A0A0G2JDN9_MOUSE DCN1-like protein 1 (Fragment) OS=Mus musculus GN=Dcun1d1 PE=1 SV=4;>tr|A0A0G2JGV7|A0A0G2JGV7_MOUSE DCN1-like protein (Fragment) OS=Mus musculus GN=Dcun1d1 PE=1 SV=1;>tr|A0A140T8R8|A0A140T8R8_MOUSE DCN1-like protein (Fragment) OS=Mus musculus GN=Dcun1d1 PE=1 SV=1;>tr…	2	2
TRUE	Old_Decellularized / Young_Decellularized	Old_Decellularized	Young_Decellularized	10	A0A1B0GR51;Q8CBG9;Q8CBG9-2	46361	43230.1	-0.100875	0.100875	-6.75326	0.932467	0	0.552162	0.240501	9	0.212261	A0A1B0GR51;Q8CBG9;Q8CBG9-2	A0A1B0GR51_MOUSE;RN170_MOUSE;RN170_MOUSE	E3 ubiquitin-protein ligase RNF170 (Fragment);E3 ubiquitin-protein ligase RNF170;Isoform 2 of E3 ubiquitin-protein ligase RNF170	Rnf170	A0A1B0GR51;Q8CBG9;Q8CBG9-2	Mus musculus	;biological_process,protein ubiquitination;	;molecular_function,transferase activity,metal ion binding;	;cellular_component,endoplasmic reticulum membrane,integral component of membrane;	tr;sp;sp	1;1;	1;1;	uniprot_mouse_proteome	>tr|A0A1B0GR51|A0A1B0GR51_MOUSE E3 ubiquitin-protein ligase RNF170 (Fragment) OS=Mus musculus GN=Rnf170 PE=1 SV=1;>sp|Q8CBG9|RN170_MOUSE E3 ubiquitin-protein ligase RNF170 OS=Mus musculus GN=Rnf170 PE=1 SV=1;>sp|Q8CBG9-2|RN170_MOUSE Isoform 2 of E3 ubiquitin-protein ligase RNF170 OS=Mus musculus GN=Rnf170	2	2
TRUE	Old_Decellularized / Young_Decellularized	Old_Decellularized	Young_Decellularized	10	A2ACH6;P82347	59600.9	65908.3	0.145126	0.145126	10.5827	1.10583	0	0.779948	0.307494	9	0.191895	A2ACH6;P82347	A2ACH6_MOUSE;SGCD_MOUSE	Delta-sarcoglycan	Sgcd	A2ACH6;P82347	Mus musculus	;muscle organ development,cardiac muscle tissue development,muscle cell development,heart contraction,membrane organization	;protein binding	;cytoplasm,cytoskeleton,integral component of plasma membrane,dystrophin-associated glycoprotein complex,dystroglycan complex,sarcoglycan complex,sarcolemma	tr;sp	1	1	uniprot_mouse_proteome	>tr|A2ACH6|A2ACH6_MOUSE Delta-sarcoglycan OS=Mus musculus GN=Sgcd PE=1 SV=1;>sp|P82347|SGCD_MOUSE Delta-sarcoglycan OS=Mus musculus GN=Sgcd PE=1 SV=1	2	2
TRUE	Old_Decellularized / Young_Decellularized	Old_Decellularized	Young_Decellularized	10	A2AJ88;A2AJ88-2;A2AJ88-3	43296.8	62486.6	0.529285	0.529285	44.3213	1.44321	0	0.314765	0.158566	9	0.541139	A2AJ88;A2AJ88-2;A2AJ88-3	PLPL7_MOUSE	Patatin-like phospholipase domain-containing protein 7;Isoform 2 of Patatin-like phospholipase domain-containing protein 7;Isoform 3 of Patatin-like phospholipase domain-containing protein 7	Pnpla7	A2AJ88;A2AJ88-2;A2AJ88-3	Mus musculus	developmental process,glycerophospholipid catabolic process;;	lysophospholipase activity;;	lysosomal membrane,endoplasmic reticulum,endoplasmic reticulum membrane,integral component of membrane,nuclear membrane,mitochondrial membrane;;	sp	1;;	1;;	uniprot_mouse_proteome	>sp|A2AJ88|PLPL7_MOUSE Patatin-like phospholipase domain-containing protein 7 OS=Mus musculus GN=Pnpla7 PE=1 SV=1;>sp|A2AJ88-2|PLPL7_MOUSE Isoform 2 of Patatin-like phospholipase domain-containing protein 7 OS=Mus musculus GN=Pnpla7;>sp|A2AJ88-3|PLPL7_MOUSE Isoform 3 of Patatin-like phospholipase domain-containing protein 7 OS=Mus musculus GN=Pnpla7	2	2
TRUE	Old_Decellularized / Young_Decellularized	Old_Decellularized	Young_Decellularized	10	D3YZ98;E9Q824;E9QLS6;Q6PF93;Q6PF93-2	107474	124498	0.212131	0.212131	15.8398	1.1584	0	0.34953	0.171399	9	0.147341	D3YZ98;E9Q824;E9QLS6;Q6PF93;Q6PF93-2	D3YZ98_MOUSE;E9Q824_MOUSE;E9QLS6_MOUSE;PK3C3_MOUSE;PK3C3_MOUSE	Phosphatidylinositol 3-kinase;Phosphatidylinositol 3-kinase catalytic subunit type 3;Phosphatidylinositol 3-kinase;Phosphatidylinositol 3-kinase catalytic subunit type 3;Isoform 2 of Phosphatidylinositol 3-kinase catalytic subunit type 3	Pik3c3	D3YZ98;E9Q824;E9QLS6;Q6PF93;Q6PF93-2	Mus musculus	;;;autophagosome assembly,cytokinesis,protein phosphorylation,protein lipidation,endocytosis,autophagy,endosome organization,cellular response to starvation,endosomal transport,macroautophagy,protein processing,pexophagy,regulation of cytokinesis,protein localization to pre-autophagosomal structure,phosphatidylinositol-3-phosphate biosynthetic process,cellular response to glucose starvation,respo…	;;;protein kinase activity,protein binding,ATP binding,kinase activity,1-phosphatidylinositol-3-kinase activity;	;;;pre-autophagosomal structure,endosome,late endosome,peroxisome,cytosol,membrane,midbody,phosphatidylinositol 3-kinase complex, class III, type I,phosphatidylinositol 3-kinase complex, class III, type II,phosphatidylinositol 3-kinase complex, class III,autolysosome,phagocytic vesicle;	tr;tr;tr;sp;sp	1;1;1;1;	1;1;1;1;	uniprot_mouse_proteome	>tr|D3YZ98|D3YZ98_MOUSE Phosphatidylinositol 3-kinase OS=Mus musculus GN=Pik3c3 PE=1 SV=1;>tr|E9Q824|E9Q824_MOUSE Phosphatidylinositol 3-kinase catalytic subunit type 3 OS=Mus musculus GN=Pik3c3 PE=1 SV=1;>tr|E9QLS6|E9QLS6_MOUSE Phosphatidylinositol 3-kinase OS=Mus musculus GN=Pik3c3 PE=1 SV=1;>sp|Q6PF93|PK3C3_MOUSE Phosphatidylinositol 3-kinase catalytic subunit type 3 OS=Mus musculus GN=Pik3c3 …	2	2
TRUE	Old_Decellularized / Young_Decellularized	Old_Decellularized	Young_Decellularized	10	E9QAS7;Q3TZT4;Q7TNC9	55156.4	54568.4	-0.015462	0.015462	-1.06602	0.98934	0	0.576063	0.247291	9	0.0765065	E9QAS7;Q3TZT4;Q7TNC9	E9QAS7_MOUSE;Q3TZT4_MOUSE;Q7TNC9_MOUSE	Protein Inpp5a;Protein Inpp5a;Inpp5a protein	Inpp5a	E9QAS7;Q3TZT4;Q7TNC9	Mus musculus	inositol phosphate dephosphorylation,phosphatidylinositol dephosphorylation,inositol phosphate-mediated signaling;;	inositol-polyphosphate 5-phosphatase activity,PH domain binding;;	intracellular,membrane,extracellular exosome;;	tr	1	1	uniprot_mouse_proteome	>tr|E9QAS7|E9QAS7_MOUSE Protein Inpp5a OS=Mus musculus GN=Inpp5a PE=1 SV=1;>tr|Q3TZT4|Q3TZT4_MOUSE Protein Inpp5a OS=Mus musculus GN=Inpp5a PE=1 SV=1;>tr|Q7TNC9|Q7TNC9_MOUSE Inpp5a protein OS=Mus musculus GN=Inpp5a PE=1 SV=1	2	2
TRUE	Old_Decellularized / Young_Decellularized	Old_Decellularized	Young_Decellularized	10	F6XU64;Q56A08	103991	102832	-0.0161652	0.0161652	-1.11423	0.988858	0	0.928246	0.346967	9	0.130522	F6XU64;Q56A08	F6XU64_MOUSE;GPKOW_MOUSE	G patch domain and KOW motifs-containing protein (Fragment);G patch domain and KOW motifs-containing protein	Gpkow	F6XU64;Q56A08	Mus musculus	;biological_process	;molecular_function,nucleic acid binding	;nucleoplasm	tr;sp	1	1;2	uniprot_mouse_proteome	>tr|F6XU64|F6XU64_MOUSE G patch domain and KOW motifs-containing protein (Fragment) OS=Mus musculus GN=Gpkow PE=1 SV=1;>sp|Q56A08|GPKOW_MOUSE G patch domain and KOW motifs-containing protein OS=Mus musculus GN=Gpkow PE=1 SV=2	2	2
TRUE	Old_Decellularized / Young_Decellularized	Old_Decellularized	Young_Decellularized	10	F7ARZ1;Q3TI14;Q8VE22	39722.7	60841.9	0.615099	0.615099	53.1663	1.53166	0	0.00962165	0.0112177	9	0.202088	F7ARZ1;Q3TI14;Q8VE22	F7ARZ1_MOUSE;Q3TI14_MOUSE;RT23_MOUSE	28S ribosomal protein S23, mitochondrial (Fragment);28S ribosomal protein S23, mitochondrial;28S ribosomal protein S23, mitochondrial	Mrps23	F7ARZ1;Q3TI14;Q8VE22	Mus musculus	;;translation	;;RNA binding,structural constituent of ribosome	;;mitochondrion,mitochondrial small ribosomal subunit,nuclear membrane,intermediate filament cytoskeleton	tr;tr;sp	1	1	uniprot_mouse_proteome	>tr|F7ARZ1|F7ARZ1_MOUSE 28S ribosomal protein S23, mitochondrial (Fragment) OS=Mus musculus GN=Mrps23 PE=1 SV=1;>tr|Q3TI14|Q3TI14_MOUSE 28S ribosomal protein S23, mitochondrial OS=Mus musculus GN=Mrps23 PE=1 SV=1;>sp|Q8VE22|RT23_MOUSE 28S ribosomal protein S23, mitochondrial OS=Mus musculus GN=Mrps23 PE=1 SV=1	2	2
TRUE	Old_Decellularized / Young_Decellularized	Old_Decellularized	Young_Decellularized	10	O54833	148245	140351	-0.0789375	0.0789375	-5.32453	0.946755	0	0.194034	0.109886	9	0.073254	O54833	CSK22_MOUSE	Casein kinase II subunit alpha'	Csnk2a2	O54833	Mus musculus	transcription, DNA-templated,regulation of transcription, DNA-templated,protein phosphorylation,apoptotic process,cell cycle,spermatogenesis,Wnt signaling pathway,cerebral cortex development,regulation of cell cycle,liver regeneration,regulation of mitophagy,positive regulation of protein targeting to mitochondrion,Requires Ontology	protein kinase activity,protein serine/threonine kinase activity,protein binding,ATP binding,protein N-terminus binding	chromatin,acrosomal vesicle,nucleus,plasma membrane,protein kinase CK2 complex,PcG protein complex	sp	1	1	uniprot_mouse_proteome	>sp|O54833|CSK22_MOUSE Casein kinase II subunit alpha' OS=Mus musculus GN=Csnk2a2 PE=1 SV=1	2	2
TRUE	Old_Decellularized / Young_Decellularized	Old_Decellularized	Young_Decellularized	10	P01900	89891	122678	0.448626	0.448626	36.4739	1.36474	0	0.480752	0.217085	9	0.366382	P01900	HA12_MOUSE	H-2 class I histocompatibility antigen, D-D alpha chain	H2-D1	P01900	Mus musculus				sp	1	1	uniprot_mouse_proteome	>sp|P01900|HA12_MOUSE H-2 class I histocompatibility antigen, D-D alpha chain OS=Mus musculus GN=H2-D1 PE=1 SV=1	2	2
TRUE	Old_Decellularized / Young_Decellularized	Old_Decellularized	Young_Decellularized	10	P18293	29196.2	32047.4	0.134428	0.134428	9.76575	1.09766	0	0.638966	0.267754	9	0.298024	P18293	ANPRA_MOUSE	Atrial natriuretic peptide receptor 1	Npr1	P18293	Mus musculus	cGMP biosynthetic process,protein phosphorylation,receptor guanylyl cyclase signaling pathway,positive regulation of cGMP biosynthetic process,intracellular signal transduction,dopamine metabolic process,negative regulation of smooth muscle cell proliferation,regulation of blood vessel size,regulation of blood pressure	guanylate cyclase activity,protein kinase activity,ATP binding,GTP binding,natriuretic peptide receptor activity,peptide hormone binding,protein kinase binding,hormone binding,adenylate cyclase activity	plasma membrane,guanylate cyclase complex, soluble,integral component of membrane,receptor complex	sp	1	2	uniprot_mouse_proteome	>sp|P18293|ANPRA_MOUSE Atrial natriuretic peptide receptor 1 OS=Mus musculus GN=Npr1 PE=1 SV=2	2	2
TRUE	Old_Decellularized / Young_Decellularized	Old_Decellularized	Young_Decellularized	15	P34884	177658	208316	0.229669	0.229669	17.2566	1.17257	0	0.347658	0.170893	14	0.865817	P34884	MIF_MOUSE	Macrophage migration inhibitory factor	Mif	P34884	Mus musculus	prostaglandin biosynthetic process,positive regulation of protein phosphorylation,positive regulation of adaptive immune response,negative regulation of mature B cell apoptotic process,inflammatory response,cell surface receptor signaling pathway,cell aging,cell proliferation,regulation of receptor activity,negative regulation of gene expression,positive regulation of protein kinase A signaling,n…	protease binding,dopachrome isomerase activity,receptor binding,cytokine activity,cytokine receptor binding,chemoattractant activity,identical protein binding,phenylpyruvate tautomerase activity	extracellular region,extracellular space,nucleoplasm,cytosol,cell surface,vesicle,myelin sheath,extracellular exosome	sp	1	2	uniprot_mouse_proteome	>sp|P34884|MIF_MOUSE Macrophage migration inhibitory factor OS=Mus musculus GN=Mif PE=1 SV=2	2	3
TRUE	Old_Decellularized / Young_Decellularized	Old_Decellularized	Young_Decellularized	10	P34928	96277.1	177341	0.881261	0.881261	84.1985	1.84199	0	0.0346209	0.0294918	9	0.262363	P34928	APOC1_MOUSE	Apolipoprotein C-I	Apoc1	P34928	Mus musculus	triglyceride metabolic process,cholesterol metabolic process,negative regulation of phosphatidylcholine catabolic process,negative regulation of very-low-density lipoprotein particle clearance,negative regulation of cholesterol transport,cholesterol efflux,phospholipid efflux,plasma lipoprotein particle remodeling,chylomicron remnant clearance,very-low-density lipoprotein particle clearance,lipop…	phospholipase inhibitor activity,fatty acid binding	endoplasmic reticulum,very-low-density lipoprotein particle,high-density lipoprotein particle,extracellular exosome	sp	1	1	uniprot_mouse_proteome	>sp|P34928|APOC1_MOUSE Apolipoprotein C-I OS=Mus musculus GN=Apoc1 PE=1 SV=1	2	2
TRUE	Old_Decellularized / Young_Decellularized	Old_Decellularized	Young_Decellularized	10	P97314	126813	95892.4	-0.403215	0.403215	-24.3828	0.756172	0	0.0687984	0.0501114	9	0.169528	P97314	CSRP2_MOUSE	Cysteine and glycine-rich protein 2	Csrp2	P97314	Mus musculus	multicellular organism development,cell differentiation	protein binding,metal ion binding	nucleus,focal adhesion	sp	1	3	uniprot_mouse_proteome	>sp|P97314|CSRP2_MOUSE Cysteine and glycine-rich protein 2 OS=Mus musculus GN=Csrp2 PE=1 SV=3	2	2
TRUE	Old_Decellularized / Young_Decellularized	Old_Decellularized	Young_Decellularized	10	P97471	27299.5	30495.9	0.159742	0.159742	11.7088	1.11709	0	0.373586	0.180275	9	0.168814	P97471	SMAD4_MOUSE	Mothers against decapentaplegic homolog 4	Smad4	P97471	Mus musculus	negative regulation of transcription from RNA polymerase II promoter,ovarian follicle development,branching involved in ureteric bud morphogenesis,response to hypoxia,in utero embryonic development,gastrulation with mouth forming second,kidney development,outflow tract septum morphogenesis,atrioventricular valve formation,epithelial to mesenchymal transition involved in endocardial cushion format…	RNA polymerase II regulatory region sequence-specific DNA binding,RNA polymerase II core promoter proximal region sequence-specific DNA binding,core promoter proximal region sequence-specific DNA binding,transcription factor activity, RNA polymerase II transcription factor binding,transcriptional activator activity, RNA polymerase II core promoter proximal region sequence-specific binding,RNA pol…	nuclear chromatin,nucleus,nucleoplasm,transcription factor complex,cytoplasm,centrosome,cytosol,activin responsive factor complex,SMAD protein complex,RNA polymerase II transcription factor complex	sp	1	2	uniprot_mouse_proteome	>sp|P97471|SMAD4_MOUSE Mothers against decapentaplegic homolog 4 OS=Mus musculus GN=Smad4 PE=1 SV=2	2	2
TRUE	Old_Decellularized / Young_Decellularized	Old_Decellularized	Young_Decellularized	10	Q3UFK8	59046.5	63287.7	0.100073	0.100073	7.1828	1.07183	0	0.852643	0.327022	9	0.147201	Q3UFK8	FRMD8_MOUSE	FERM domain-containing protein 8	Frmd8	Q3UFK8	Mus musculus	biological_process	molecular_function	cellular_component,cytoskeleton	sp	1	2	uniprot_mouse_proteome	>sp|Q3UFK8|FRMD8_MOUSE FERM domain-containing protein 8 OS=Mus musculus GN=Frmd8 PE=1 SV=2	2	2
TRUE	Old_Decellularized / Young_Decellularized	Old_Decellularized	Young_Decellularized	10	Q3ULD5	85775.1	92145.3	0.103352	0.103352	7.42663	1.07427	0	0.579635	0.248543	9	0.294807	Q3ULD5	MCCB_MOUSE	Methylcrotonoyl-CoA carboxylase beta chain, mitochondrial	Mccc2	Q3ULD5	Mus musculus	leucine catabolic process,coenzyme A metabolic process	ATP binding,methylcrotonoyl-CoA carboxylase activity	mitochondrion,mitochondrial matrix,methylcrotonoyl-CoA carboxylase complex	sp	1	1	uniprot_mouse_proteome	>sp|Q3ULD5|MCCB_MOUSE Methylcrotonoyl-CoA carboxylase beta chain, mitochondrial OS=Mus musculus GN=Mccc2 PE=1 SV=1	2	2
TRUE	Old_Decellularized / Young_Decellularized	Old_Decellularized	Young_Decellularized	15	Q3UV17	5423226	3.18434e+06	-0.768158	0.768158	-41.2833	0.587167	0	0.00152711	0.00245785	14	0.145611	Q3UV17	K22O_MOUSE	Keratin, type II cytoskeletal 2 oral	Krt76	Q3UV17	Mus musculus	epidermis development,pigmentation,sebaceous gland development	molecular_function,structural molecule activity	nucleus,keratin filament,extracellular exosome	sp	1	1	uniprot_mouse_proteome	>sp|Q3UV17|K22O_MOUSE Keratin, type II cytoskeletal 2 oral OS=Mus musculus GN=Krt76 PE=1 SV=1	2	3
TRUE	Old_Decellularized / Young_Decellularized	Old_Decellularized	Young_Decellularized	10	Q501J2	163766	143635	-0.189235	0.189235	-12.2929	0.877071	0	0.183296	0.105353	9	0.163839	Q501J2	F173A_MOUSE	Protein FAM173A	Fam173a	Q501J2	Mus musculus	biological_process	molecular_function	cellular_component,integral component of membrane	sp	1	1	uniprot_mouse_proteome	>sp|Q501J2|F173A_MOUSE Protein FAM173A OS=Mus musculus GN=Fam173a PE=1 SV=1	2	2
TRUE	Old_Decellularized / Young_Decellularized	Old_Decellularized	Young_Decellularized	10	Q60596	85674.5	63351.7	-0.435481	0.435481	-26.0553	0.739447	0	0.0033999	0.00474759	9	0.0982607	Q60596	XRCC1_MOUSE	DNA repair protein XRCC1	Xrcc1	Q60596	Mus musculus	single strand break repair,response to hypoxia,DNA repair,base-excision repair,double-strand break repair via nonhomologous end joining,response to organic substance,negative regulation of protein ADP-ribosylation,hippocampus development,response to drug,Requires Ontology,positive regulation of single strand break repair,positive regulation of DNA ligase activity	enzyme binding,oxidized DNA binding,3' overhang single-stranded DNA endodeoxyribonuclease activity	nuclear chromosome, telomeric region,nuclear chromatin,nucleus,nucleolus,ERCC4-ERCC1 complex	sp	1	2	uniprot_mouse_proteome	>sp|Q60596|XRCC1_MOUSE DNA repair protein XRCC1 OS=Mus musculus GN=Xrcc1 PE=1 SV=2	2	2
TRUE	Old_Decellularized / Young_Decellularized	Old_Decellularized	Young_Decellularized	10	Q61090	27107.1	39588.5	0.546413	0.546413	46.045	1.46045	0	0.0435899	0.0352576	9	0.285994	Q61090	FZD7_MOUSE	Frizzled-7	Fzd7	Q61090	Mus musculus	regulation of transcription, DNA-templated,G-protein coupled receptor signaling pathway,negative regulation of cell-substrate adhesion,skeletal muscle satellite cell maintenance involved in skeletal muscle regeneration,stem cell population maintenance,T cell differentiation in thymus,substrate adhesion-dependent cell spreading,regulation of catenin import into nucleus,non-canonical Wnt signaling …	G-protein coupled receptor activity,frizzled binding,protein binding,phosphatidylinositol-4,5-bisphosphate binding,Wnt-protein binding,PDZ domain binding,Wnt-activated receptor activity	plasma membrane,integral component of membrane,recycling endosome membrane	sp	1	2	uniprot_mouse_proteome	>sp|Q61090|FZD7_MOUSE Frizzled-7 OS=Mus musculus GN=Fzd7 PE=1 SV=2	2	2
TRUE	Old_Decellularized / Young_Decellularized	Old_Decellularized	Young_Decellularized	10	Q64674	217960	128523	-0.762039	0.762039	-41.0337	0.589663	0	0.000594512	0.00111111	9	0.13684	Q64674	SPEE_MOUSE	Spermidine synthase	Srm	Q64674	Mus musculus	spermidine biosynthetic process,cellular response to leukemia inhibitory factor	spermidine synthase activity,identical protein binding,protein homodimerization activity		sp	1	1	uniprot_mouse_proteome	>sp|Q64674|SPEE_MOUSE Spermidine synthase OS=Mus musculus GN=Srm PE=1 SV=1	2	2
TRUE	Old_Decellularized / Young_Decellularized	Old_Decellularized	Young_Decellularized	10	Q80TN5	64812.3	42857.9	-0.596707	0.596707	-33.8739	0.661261	0	0.0155814	0.0161711	9	0.290972	Q80TN5	ZDH17_MOUSE	Palmitoyltransferase ZDHHC17	Zdhhc17	Q80TN5	Mus musculus	signal transduction,protein palmitoylation,lipoprotein transport,positive regulation of I-kappaB kinase/NF-kappaB signaling,magnesium ion transmembrane transport	signal transducer activity,protein binding,magnesium ion transmembrane transporter activity,palmitoyltransferase activity,protein-cysteine S-palmitoyltransferase activity,identical protein binding	Golgi membrane,Golgi apparatus,cytosol,integral component of membrane,cell junction,cytoplasmic vesicle membrane,Golgi-associated vesicle membrane,presynaptic membrane,intracellular membrane-bounded organelle	sp	1	2	uniprot_mouse_proteome	>sp|Q80TN5|ZDH17_MOUSE Palmitoyltransferase ZDHHC17 OS=Mus musculus GN=Zdhhc17 PE=1 SV=2	2	2
TRUE	Old_Decellularized / Young_Decellularized	Old_Decellularized	Young_Decellularized	10	Q80X71	87912.4	111392	0.341506	0.341506	26.7078	1.26708	0	0.00634001	0.0079905	9	0.114996	Q80X71	T106B_MOUSE	Transmembrane protein 106B	Tmem106b	Q80X71	Mus musculus	lysosome organization,lysosomal transport,lysosome localization,dendrite morphogenesis,positive regulation of dendrite development	molecular_function	lysosome,lysosomal membrane,endosome,integral component of membrane,late endosome membrane,extracellular exosome	sp	1	1	uniprot_mouse_proteome	>sp|Q80X71|T106B_MOUSE Transmembrane protein 106B OS=Mus musculus GN=Tmem106b PE=1 SV=1	2	2
TRUE	Old_Decellularized / Young_Decellularized	Old_Decellularized	Young_Decellularized	10	Q8BGA9	450470	428063	-0.0736062	0.0736062	-4.97403	0.95026	0	0.211701	0.117101	9	0.0530435	Q8BGA9	OXA1L_MOUSE	Mitochondrial inner membrane protein OXA1L	Oxa1l	Q8BGA9	Mus musculus	aerobic respiration,negative regulation of ATPase activity,mitochondrial respiratory chain complex I assembly,mitochondrial proton-transporting ATP synthase complex assembly,protein insertion into membrane,protein tetramerization,negative regulation of oxidoreductase activity,mitochondrial respiratory chain complex I biogenesis	protein homodimerization activity,mitochondrial ribosome binding	mitochondrion,mitochondrial inner membrane,mitochondrial membrane,integral component of mitochondrial membrane,protein complex	sp	1	1	uniprot_mouse_proteome	>sp|Q8BGA9|OXA1L_MOUSE Mitochondrial inner membrane protein OXA1L OS=Mus musculus GN=Oxa1l PE=1 SV=1	2	2
TRUE	Old_Decellularized / Young_Decellularized	Old_Decellularized	Young_Decellularized	15	Q8BHA3;Q8BHA3-2	204326	208846	0.0315672	0.0315672	2.21219	1.02212	0	0.980544	0.360561	14	0.143517	Q8BHA3;Q8BHA3-2	DTD2_MOUSE	Probable D-tyrosyl-tRNA(Tyr) deacylase 2;Isoform 2 of Probable D-tyrosyl-tRNA(Tyr) deacylase 2	Dtd2	Q8BHA3;Q8BHA3-2	Mus musculus	tRNA metabolic process,regulation of translational fidelity;	aminoacyl-tRNA editing activity,D-tyrosyl-tRNA(Tyr) deacylase activity;	cytoplasm;	sp	1;	1;	uniprot_mouse_proteome	>sp|Q8BHA3|DTD2_MOUSE Probable D-tyrosyl-tRNA(Tyr) deacylase 2 OS=Mus musculus GN=Dtd2 PE=1 SV=1;>sp|Q8BHA3-2|DTD2_MOUSE Isoform 2 of Probable D-tyrosyl-tRNA(Tyr) deacylase 2 OS=Mus musculus GN=Dtd2	2	3
TRUE	Old_Decellularized / Young_Decellularized	Old_Decellularized	Young_Decellularized	10	Q8C050;Q8C050-2	45172.2	31051	-0.540798	0.540798	-31.261	0.68739	0	0.0493726	0.0387908	9	0.230453	Q8C050;Q8C050-2	KS6A5_MOUSE	Ribosomal protein S6 kinase alpha-5;Isoform 1 of Ribosomal protein S6 kinase alpha-5	Rps6ka5	Q8C050;Q8C050-2	Mus musculus	regulation of transcription, DNA-templated,protein phosphorylation,inflammatory response,histone phosphorylation,positive regulation of histone phosphorylation,positive regulation of histone acetylation,intracellular signal transduction,histone H3-S10 phosphorylation,histone H3-S28 phosphorylation,histone H2A-S1 phosphorylation,negative regulation of transcription, DNA-templated,positive regulati…	magnesium ion binding,protein kinase activity,protein serine/threonine kinase activity,protein binding,ATP binding;	nucleus,nucleoplasm,cytoplasm;	sp	1;	2;	uniprot_mouse_proteome	>sp|Q8C050|KS6A5_MOUSE Ribosomal protein S6 kinase alpha-5 OS=Mus musculus GN=Rps6ka5 PE=1 SV=2;>sp|Q8C050-2|KS6A5_MOUSE Isoform 1 of Ribosomal protein S6 kinase alpha-5 OS=Mus musculus GN=Rps6ka5	2	2
TRUE	Old_Decellularized / Young_Decellularized	Old_Decellularized	Young_Decellularized	10	Q8C0N2	57237.1	68536.2	0.259916	0.259916	19.7409	1.19741	0	0.21904	0.119872	9	0.338555	Q8C0N2	GPAT3_MOUSE	Glycerol-3-phosphate acyltransferase 3	Gpat3	Q8C0N2	Mus musculus	CDP-diacylglycerol biosynthetic process,triglyceride biosynthetic process,regulation of TOR signaling	1-acylglycerol-3-phosphate O-acyltransferase activity,glycerol-3-phosphate O-acyltransferase activity,Requires Ontology	endoplasmic reticulum,endoplasmic reticulum membrane,integral component of membrane	sp	1	1	uniprot_mouse_proteome	>sp|Q8C0N2|GPAT3_MOUSE Glycerol-3-phosphate acyltransferase 3 OS=Mus musculus GN=Gpat3 PE=1 SV=1	2	2
TRUE	Old_Decellularized / Young_Decellularized	Old_Decellularized	Young_Decellularized	10	Q8K094	160289	145575	-0.138919	0.138919	-9.18007	0.908199	0	0.105825	0.0694781	9	0.113844	Q8K094	Q8K094_MOUSE	Nectin-2	Pvr	Q8K094	Mus musculus	positive regulation of natural killer cell mediated cytotoxicity directed against tumor cell target,homophilic cell adhesion via plasma membrane adhesion molecules,heterophilic cell-cell adhesion via plasma membrane cell adhesion molecules,cell recognition,cell migration,susceptibility to natural killer cell mediated cytotoxicity,viral entry into host cell,susceptibility to T cell mediated cytoto…	virus receptor activity,receptor activity,receptor binding,protein binding,protein homodimerization activity,dynein light chain binding,cell adhesion molecule binding	plasma membrane,integral component of plasma membrane,cell-cell adherens junction,cell surface	tr	1	1	uniprot_mouse_proteome	>tr|Q8K094|Q8K094_MOUSE Nectin-2 OS=Mus musculus GN=Pvr PE=1 SV=1	2	2
TRUE	Old_Decellularized / Young_Decellularized	Old_Decellularized	Young_Decellularized	10	Q8K2A8	108311	87397.5	-0.30951	0.30951	-19.3084	0.806916	0	0.00835164	0.0100587	9	0.111355	Q8K2A8	ALG3_MOUSE	Dol-P-Man:Man(5)GlcNAc(2)-PP-Dol alpha-1,3-mannosyltransferase	Alg3	Q8K2A8	Mus musculus	protein glycosylation,mannosylation	alpha-1,3-mannosyltransferase activity,dol-P-Man:Man(5)GlcNAc(2)-PP-Dol alpha-1,3-mannosyltransferase activity	endoplasmic reticulum,endoplasmic reticulum membrane,integral component of membrane	sp	1	2	uniprot_mouse_proteome	>sp|Q8K2A8|ALG3_MOUSE Dol-P-Man:Man(5)GlcNAc(2)-PP-Dol alpha-1,3-mannosyltransferase OS=Mus musculus GN=Alg3 PE=1 SV=2	2	2
TRUE	Old_Decellularized / Young_Decellularized	Old_Decellularized	Young_Decellularized	15	Q8R2Z5	60613.8	48939.7	-0.308641	0.308641	-19.2598	0.807402	0	0.0149931	0.0156516	14	0.230827	Q8R2Z5	VWA1_MOUSE	von Willebrand factor A domain-containing protein 1	Vwa1	Q8R2Z5	Mus musculus	extracellular matrix organization,behavioral response to pain	protein binding,identical protein binding	extracellular region,proteinaceous extracellular matrix,basement membrane,interstitial matrix,extracellular space,extracellular exosome	sp	1	1	uniprot_mouse_proteome	>sp|Q8R2Z5|VWA1_MOUSE von Willebrand factor A domain-containing protein 1 OS=Mus musculus GN=Vwa1 PE=1 SV=1	2	3
TRUE	Old_Decellularized / Young_Decellularized	Old_Decellularized	Young_Decellularized	10	Q8VEL2	37024.1	7819.62	-2.24329	2.24329	-78.8796	0.211204	0	0.000153055	0.000350894	9	0.368598	Q8VEL2	MTMRE_MOUSE	Myotubularin-related protein 14	Mtmr14	Q8VEL2	Mus musculus	peptidyl-tyrosine dephosphorylation	phosphatidylinositol-3-phosphatase activity,protein tyrosine phosphatase activity	ruffle,perinuclear region of cytoplasm	sp	1	2	uniprot_mouse_proteome	>sp|Q8VEL2|MTMRE_MOUSE Myotubularin-related protein 14 OS=Mus musculus GN=Mtmr14 PE=1 SV=2	2	2
TRUE	Old_Decellularized / Young_Decellularized	Old_Decellularized	Young_Decellularized	10	Q99MR3	35237.7	38091.7	0.112357	0.112357	8.09932	1.08099	0	0.578985	0.248385	9	0.15377	Q99MR3	S12A9_MOUSE	Solute carrier family 12 member 9	Slc12a9	Q99MR3	Mus musculus	potassium ion transmembrane transport,chloride transmembrane transport	potassium:chloride symporter activity,potassium ion symporter activity	plasma membrane,integral component of membrane,extracellular exosome	sp	1	2	uniprot_mouse_proteome	>sp|Q99MR3|S12A9_MOUSE Solute carrier family 12 member 9 OS=Mus musculus GN=Slc12a9 PE=1 SV=2	2	2
TRUE	Old_Decellularized / Young_Decellularized	Old_Decellularized	Young_Decellularized	10	Q9CQ10	55672.4	88343.4	0.666159	0.666159	58.6842	1.58684	0	0.00917874	0.0108621	9	0.329534	Q9CQ10	CHMP3_MOUSE	Charged multivesicular body protein 3	Chmp3	Q9CQ10	Mus musculus	cell separation after cytokinesis,cell cycle,regulation of centrosome duplication,protein transport,positive regulation of cytokinesis,viral budding via host ESCRT complex,regulation of viral process,regulation of endosome size,protein polymerization,protein heterooligomerization,multivesicular body-lysosome fusion,negative regulation of viral release from host cell,positive regulation of viral r…	phosphatidylinositol-4,5-bisphosphate binding,phosphatidylcholine binding,protein homodimerization activity,ubiquitin-specific protease binding	ESCRT III complex,intracellular,early endosome,late endosome,cytosol,plasma membrane,midbody,cytoplasmic vesicle,late endosome membrane,extracellular exosome	sp	1	3	uniprot_mouse_proteome	>sp|Q9CQ10|CHMP3_MOUSE Charged multivesicular body protein 3 OS=Mus musculus GN=Chmp3 PE=1 SV=3	2	2
TRUE	Old_Decellularized / Young_Decellularized	Old_Decellularized	Young_Decellularized	10	Q9CQJ4	100145	98668	-0.0214383	0.0214383	-1.475	0.98525	0	0.832351	0.322032	9	0.112336	Q9CQJ4	RING2_MOUSE	E3 ubiquitin-protein ligase RING2	Rnf2	Q9CQJ4	Mus musculus	negative regulation of transcription from RNA polymerase II promoter,mitotic cell cycle,gastrulation with mouth forming second,transcription, DNA-templated,germ cell development,anterior/posterior axis specification,histone ubiquitination,histone H2A monoubiquitination,histone H2A-K119 monoubiquitination,negative regulation of sequence-specific DNA binding transcription factor activity	chromatin binding,protein binding,zinc ion binding,ubiquitin protein ligase activity,RING-like zinc finger domain binding,ubiquitin-protein transferase activity	ubiquitin ligase complex,euchromatin,heterochromatin,sex chromatin,nucleus,nucleoplasm,nuclear body,PcG protein complex,PRC1 complex,MLL1 complex	sp	1	1	uniprot_mouse_proteome	>sp|Q9CQJ4|RING2_MOUSE E3 ubiquitin-protein ligase RING2 OS=Mus musculus GN=Rnf2 PE=1 SV=1	2	2
TRUE	Old_Decellularized / Young_Decellularized	Old_Decellularized	Young_Decellularized	10	Q9D8S9	106736	99434.4	-0.102229	0.102229	-6.84077	0.931592	0	0.672572	0.277033	9	0.188013	Q9D8S9	BOLA1_MOUSE	BolA-like protein 1	Bola1	Q9D8S9	Mus musculus	biological_process	molecular_function	mitochondrion	sp	1	1	uniprot_mouse_proteome	>sp|Q9D8S9|BOLA1_MOUSE BolA-like protein 1 OS=Mus musculus GN=Bola1 PE=1 SV=1	2	2
TRUE	Old_Decellularized / Young_Decellularized	Old_Decellularized	Young_Decellularized	10	Q9DC71	38392.8	55969.5	0.543804	0.543804	45.7812	1.45781	0	0.0036937	0.00505888	9	0.152406	Q9DC71	RT15_MOUSE	28S ribosomal protein S15, mitochondrial	Mrps15	Q9DC71	Mus musculus	mitochondrial translation	RNA binding,structural constituent of ribosome	nucleus,nucleolus,mitochondrion,mitochondrial ribosome,mitochondrial small ribosomal subunit	sp	1	2	uniprot_mouse_proteome	>sp|Q9DC71|RT15_MOUSE 28S ribosomal protein S15, mitochondrial OS=Mus musculus GN=Mrps15 PE=1 SV=2	2	2
TRUE	Old_Decellularized / Young_Decellularized	Old_Decellularized	Young_Decellularized	10	Q9ERY9	279141	248097	-0.170094	0.170094	-11.1215	0.888785	0	0.658531	0.273381	9	0.105918	Q9ERY9	ERG28_MOUSE	Probable ergosterol biosynthetic protein 28	ORF11	Q9ERY9	Mus musculus	ergosterol biosynthetic process	protein binding, bridging	endoplasmic reticulum membrane,integral component of membrane,transport vesicle	sp	2	1	uniprot_mouse_proteome	>sp|Q9ERY9|ERG28_MOUSE Probable ergosterol biosynthetic protein 28 OS=Mus musculus GN=ORF11 PE=2 SV=1	2	2
TRUE	Old_Decellularized / Young_Decellularized	Old_Decellularized	Young_Decellularized	10	Q9QZ85	37359.8	58121	0.637572	0.637572	55.5708	1.55571	0	0.0077946	0.0095106	9	0.240766	Q9QZ85	IIGP1_MOUSE	Interferon-inducible GTPase 1	Iigp1	Q9QZ85	Mus musculus	regulation of autophagy,cytokine-mediated signaling pathway,cellular response to interferon-beta,defense response to protozoan,innate immune response,defense response to Gram-negative bacterium	GTPase activity,protein binding,GTP binding,GDP binding,identical protein binding	endoplasmic reticulum membrane,symbiont-containing vacuole membrane,nuclear membrane,Golgi cisterna membrane	sp	1	2	uniprot_mouse_proteome	>sp|Q9QZ85|IIGP1_MOUSE Interferon-inducible GTPase 1 OS=Mus musculus GN=Iigp1 PE=1 SV=2	2	2
TRUE	Old_Decellularized / Young_Decellularized	Old_Decellularized	Young_Decellularized	10	Q9QZB7	18782.6	22797.8	0.279499	0.279499	21.3773	1.21377	0	0.22173	0.121005	9	0.625733	Q9QZB7	ARP10_MOUSE	Actin-related protein 10	Actr10	Q9QZB7	Mus musculus	microtubule-based movement	protein binding	cytoplasm,dynactin complex	sp	1	2	uniprot_mouse_proteome	>sp|Q9QZB7|ARP10_MOUSE Actin-related protein 10 OS=Mus musculus GN=Actr10 PE=1 SV=2	2	2
TRUE	Old_Decellularized / Young_Decellularized	Old_Decellularized	Young_Decellularized	10	Q9WTK5	52262.1	58882.8	0.172083	0.172083	12.6684	1.12668	0	0.0941962	0.0635252	9	0.104505	Q9WTK5	NFKB2_MOUSE	Nuclear factor NF-kappa-B p100 subunit	Nfkb2	Q9WTK5	Mus musculus	negative regulation of transcription from RNA polymerase II promoter,follicular dendritic cell differentiation,germinal center formation,regulation of transcription, DNA-templated,transcription from RNA polymerase II promoter,inflammatory response,I-kappaB kinase/NF-kappaB signaling,aging,extracellular matrix organization,response to lipopolysaccharide,response to cytokine,NIK/NF-kappaB signaling…	RNA polymerase II regulatory region sequence-specific DNA binding,RNA polymerase II core promoter proximal region sequence-specific DNA binding,RNA polymerase II transcription factor activity, sequence-specific DNA binding,transcriptional activator activity, RNA polymerase II core promoter proximal region sequence-specific binding,chromatin binding,protein binding	nucleus,cytoplasm,cytosol,I-kappaB/NF-kappaB complex,Bcl3/NF-kappaB2 complex	sp	1	1	uniprot_mouse_proteome	>sp|Q9WTK5|NFKB2_MOUSE Nuclear factor NF-kappa-B p100 subunit OS=Mus musculus GN=Nfkb2 PE=1 SV=1	2	2
TRUE	Old_Decellularized / Young_Decellularized	Old_Decellularized	Young_Decellularized	10	Q9Z0M5	70638.8	102755	0.540681	0.540681	45.4659	1.45466	0	0.0273164	0.0247008	9	0.216855	Q9Z0M5	LICH_MOUSE	Lysosomal acid lipase/cholesteryl ester hydrolase	Lipa	Q9Z0M5	Mus musculus	cell morphogenesis,cytokine production,inflammatory response,cell proliferation,lipid catabolic process,lung development,tissue remodeling,homeostasis of number of cells within a tissue	sterol esterase activity,lipase activity	fibrillar center,lysosome,intracellular membrane-bounded organelle,extracellular exosome	sp	1	2	uniprot_mouse_proteome	>sp|Q9Z0M5|LICH_MOUSE Lysosomal acid lipase/cholesteryl ester hydrolase OS=Mus musculus GN=Lipa PE=1 SV=2	2	2
TRUE	Old_Decellularized / Young_Decellularized	Old_Decellularized	Young_Decellularized	10	Q9Z2Q6	22792	34127.1	0.582392	0.582392	49.7329	1.49733	0	0.00952068	0.0111382	9	0.336334	Q9Z2Q6	SEPT5_MOUSE	Septin-5	Sep5	Q9Z2Q6	Mus musculus	cell cycle,regulation of exocytosis,cell division	protein binding,GTP binding	cytoskeleton,plasma membrane,cell cortex,synaptic vesicle,terminal bouton,axon terminus,synapse	sp	1	2	uniprot_mouse_proteome	>sp|Q9Z2Q6|SEPT5_MOUSE Septin-5 OS=Mus musculus GN=Sept5 PE=1 SV=2	2	2
TRUE	Old_Decellularized / Young_Decellularized	Old_Decellularized	Young_Decellularized	10	A0A087WQE8;A2AH75;E9Q9G6;E9QAN4;G3UW47;P33173;Q60575;Q60575-2;Q60575-3;Q6TA13	16751.6	15782.1	-0.0860062	0.0860062	-5.78728	0.942127	0	0.460696	0.210629	9	0.333154	A0A087WQE8;A2AH75;E9Q9G6;E9QAN4;G3UW47;P33173;Q60575;Q60575-2;Q60575-3;Q6TA13	A0A087WQE8_MOUSE;A2AH75_MOUSE;E9Q9G6_MOUSE;E9QAN4_MOUSE;G3UW47_MOUSE;KIF1A_MOUSE;KIF1B_MOUSE;KIF1B_MOUSE;KIF1B_MOUSE;Q6TA13_MOUSE	Kinesin-like protein KIF1A;Kinesin family member 1B, isoform CRA_a;Kinesin-like protein KIF1A;Kinesin-like protein KIF1A;Kinesin family member 1A;Kinesin-like protein KIF1A;Kinesin-like protein KIF1B;Isoform 2 of Kinesin-like protein KIF1B;Isoform 3 of Kinesin-like protein KIF1B;Kinesin-like protein KIF1A	Kif1a;Kif1b;Kif1a;Kif1a;Kif1a;Kif1a;Kif1b;Kif1b;Kif1b;Kif1a	A0A087WQE8;A2AH75;E9Q9G6;E9QAN4;G3UW47;P33173;Q60575;Q60575-2;Q60575-3;Q6TA13	Mus musculus	;;;;;microtubule-based movement,cytoskeleton-dependent intracellular transport;microtubule-based movement,neuron-neuron synaptic transmission,neuromuscular synaptic transmission,anterograde axonal transport,embryo development,positive regulation of gene expression,cytoskeleton-dependent intracellular transport,lysosome localization,mitochondrion transport along microtubule,response to rotenone,ce…	;;;;;microtubule motor activity,ATP binding,microtubule binding,ATPase activity,identical protein binding;microtubule motor activity,protein binding,ATP binding,microtubule binding,ATPase activity,kinase binding,scaffold protein binding,ATP-dependent microtubule motor activity;;;	;;;;;cytoplasm,kinesin complex,microtubule,neuron projection,neuronal cell body;mitochondrion,kinesin complex,microtubule,microtubule associated complex,cytoplasmic vesicle membrane,cytoplasmic vesicle,neuron projection,axon cytoplasm;;;	tr;tr;tr;tr;tr;sp;sp;sp;sp;tr	1;1;1;1;1;1;1;;;1	1;1;1;1;1;2;2;;;1	uniprot_mouse_proteome	>tr|A0A087WQE8|A0A087WQE8_MOUSE Kinesin-like protein KIF1A OS=Mus musculus GN=Kif1a PE=1 SV=1;>tr|A2AH75|A2AH75_MOUSE Kinesin family member 1B, isoform CRA_a OS=Mus musculus GN=Kif1b PE=1 SV=1;>tr|E9Q9G6|E9Q9G6_MOUSE Kinesin-like protein KIF1A OS=Mus musculus GN=Kif1a PE=1 SV=1;>tr|E9QAN4|E9QAN4_MOUSE Kinesin-like protein KIF1A OS=Mus musculus GN=Kif1a PE=1 SV=1;>tr|G3UW47|G3UW47_MOUSE Kinesin fa…	2	2
TRUE	Old_Decellularized / Young_Decellularized	Old_Decellularized	Young_Decellularized	15	A0A0R4J1F2;Q3U4P5;Q61144;Q61144-2	231477	195861	-0.24104	0.24104	-15.3865	0.846135	0	0.86834	0.331527	14	0.204783	A0A0R4J1F2;Q3U4P5;Q61144;Q61144-2	A0A0R4J1F2_MOUSE;Q3U4P5_MOUSE;PSN2_MOUSE;PSN2_MOUSE	Presenilin;Presenilin;Presenilin-2;Isoform 2 of Presenilin-2	Psen2	A0A0R4J1F2;Q3U4P5;Q61144;Q61144-2	Mus musculus	;;negative regulation of transcription from RNA polymerase II promoter,cell fate specification,somitogenesis,positive regulation of receptor recycling,negative regulation of protein phosphorylation,hair follicle development,hematopoietic progenitor cell differentiation,T cell activation involved in immune response,myeloid leukocyte differentiation,membrane protein ectodomain proteolysis,negative …	;;endopeptidase activity,protein binding,aspartic endopeptidase activity, intramembrane cleaving;	;;Golgi membrane,kinetochore,nucleus,nuclear inner membrane,mitochondrial inner membrane,lysosomal membrane,endoplasmic reticulum,endoplasmic reticulum membrane,Golgi apparatus,centrosome,cytosol,plasma membrane,integral component of plasma membrane,cell cortex,cell surface,membrane,Z disc,axon,growth cone,neuromuscular junction,ciliary rootlet,ciliary basal body,neuronal cell body,dendritic shaf…	tr;tr;sp;sp	1;1;1;	1;1;3;	uniprot_mouse_proteome	>tr|A0A0R4J1F2|A0A0R4J1F2_MOUSE Presenilin OS=Mus musculus GN=Psen2 PE=1 SV=1;>tr|Q3U4P5|Q3U4P5_MOUSE Presenilin OS=Mus musculus GN=Psen2 PE=1 SV=1;>sp|Q61144|PSN2_MOUSE Presenilin-2 OS=Mus musculus GN=Psen2 PE=1 SV=3;>sp|Q61144-2|PSN2_MOUSE Isoform 2 of Presenilin-2 OS=Mus musculus GN=Psen2	2	3
TRUE	Old_Decellularized / Young_Decellularized	Old_Decellularized	Young_Decellularized	10	A0A0U1RNM6;E9QAJ9;Q3UIA2;Q3UIA2-2;Q3UIA2-3;Q3UIA2-4	127585	133470	0.0650602	0.0650602	4.61286	1.04613	0	0.663228	0.274635	9	0.0964762	A0A0U1RNM6;E9QAJ9;Q3UIA2;Q3UIA2-2;Q3UIA2-3;Q3UIA2-4	A0A0U1RNM6_MOUSE;E9QAJ9_MOUSE;RHG17_MOUSE;RHG17_MOUSE;RHG17_MOUSE;RHG17_MOUSE	Rho GTPase-activating protein 17;Rho GTPase-activating protein 17;Rho GTPase-activating protein 17;Isoform 2 of Rho GTPase-activating protein 17;Isoform 3 of Rho GTPase-activating protein 17;Isoform 4 of Rho GTPase-activating protein 17	Arhgap17	A0A0U1RNM6;E9QAJ9;Q3UIA2;Q3UIA2-2;Q3UIA2-3;Q3UIA2-4	Mus musculus	;;actin filament organization,signal transduction,calcium ion regulated exocytosis,positive regulation of GTPase activity;;;	;;molecular_function,GTPase activator activity,SH3 domain binding;;;	;;nucleus,cytoplasm,cytosol,plasma membrane,bicellular tight junction;;;	tr;tr;sp;sp;sp;sp	1;1;1;;;	1;1;1;;;	uniprot_mouse_proteome	>tr|A0A0U1RNM6|A0A0U1RNM6_MOUSE Rho GTPase-activating protein 17 OS=Mus musculus GN=Arhgap17 PE=1 SV=1;>tr|E9QAJ9|E9QAJ9_MOUSE Rho GTPase-activating protein 17 OS=Mus musculus GN=Arhgap17 PE=1 SV=1;>sp|Q3UIA2|RHG17_MOUSE Rho GTPase-activating protein 17 OS=Mus musculus GN=Arhgap17 PE=1 SV=1;>sp|Q3UIA2-2|RHG17_MOUSE Isoform 2 of Rho GTPase-activating protein 17 OS=Mus musculus GN=Arhgap17;>sp|Q3UI…	2	2
TRUE	Old_Decellularized / Young_Decellularized	Old_Decellularized	Young_Decellularized	10	A0A1B0GS49;Q7TN37	376486	257741	-0.546671	0.546671	-31.5402	0.684598	0	0.489594	0.220101	9	0.244023	A0A1B0GS49;Q7TN37	A0A1B0GS49_MOUSE;TRPM4_MOUSE	Transient receptor potential cation channel subfamily M member 4	Trpm4	A0A1B0GS49;Q7TN37	Mus musculus	;adaptive immune response,dendritic cell chemotaxis,regulation of T cell cytokine production,calcium ion transport,positive regulation of cytosolic calcium ion concentration,positive regulation of cell proliferation,positive regulation of heart rate,protein sumoylation,calcium-mediated signaling,negative regulation of bone mineralization,regulation of ion transmembrane transport,positive regulati…	;calcium activated cation channel activity,voltage-gated ion channel activity,calcium channel activity,calmodulin binding,ATP binding	;nucleoplasm,endoplasmic reticulum,Golgi apparatus,cytosol,plasma membrane,integral component of membrane,sodium channel complex,neuronal cell body	tr;sp	1	1	uniprot_mouse_proteome	>tr|A0A1B0GS49|A0A1B0GS49_MOUSE Transient receptor potential cation channel subfamily M member 4 OS=Mus musculus GN=Trpm4 PE=1 SV=1;>sp|Q7TN37|TRPM4_MOUSE Transient receptor potential cation channel subfamily M member 4 OS=Mus musculus GN=Trpm4 PE=1 SV=1	2	2
TRUE	Old_Decellularized / Young_Decellularized	Old_Decellularized	Young_Decellularized	10	A2A4P3;A2A4P4;Q3THG9	70353.5	81148.8	0.205949	0.205949	15.3445	1.15345	0	0.060492	0.0455206	9	0.104221	A2A4P3;A2A4P4;Q3THG9	A2A4P3_MOUSE;A2A4P4_MOUSE;AASD1_MOUSE	Protein Gm27029;Protein Gm27029;Alanyl-tRNA editing protein Aarsd1	Gm27029;Gm27029;Aarsd1	A2A4P3;A2A4P4;Q3THG9	Mus musculus	;alanyl-tRNA aminoacylation;alanyl-tRNA aminoacylation,regulation of translational fidelity	;nucleic acid binding,alanine-tRNA ligase activity,ATP binding;aminoacyl-tRNA editing activity,Ser-tRNA(Ala) hydrolase activity,nucleic acid binding,alanine-tRNA ligase activity,protein binding,ATP binding,metal ion binding	;;nucleus,cytoplasm	tr;tr;sp	4;4;1	1;1;2	uniprot_mouse_proteome	>tr|A2A4P3|A2A4P3_MOUSE Protein Gm27029 OS=Mus musculus GN=Gm27029 PE=4 SV=1;>tr|A2A4P4|A2A4P4_MOUSE Protein Gm27029 OS=Mus musculus GN=Gm27029 PE=4 SV=1;>sp|Q3THG9|AASD1_MOUSE Alanyl-tRNA editing protein Aarsd1 OS=Mus musculus GN=Aarsd1 PE=1 SV=2	2	2
TRUE	Old_Decellularized / Young_Decellularized	Old_Decellularized	Young_Decellularized	10	D3YX80;Q8K4P0	85672.4	88857.2	0.0526579	0.0526579	3.71739	1.03717	0	0.566421	0.244466	9	0.222246	D3YX80;Q8K4P0	D3YX80_MOUSE;WDR33_MOUSE	pre-mRNA 3' end-processing protein WDR33;pre-mRNA 3' end processing protein WDR33	Wdr33	D3YX80;Q8K4P0	Mus musculus	;mRNA polyadenylation,mRNA cleavage	;RNA binding	;fibrillar center,collagen trimer,nucleus,nucleoplasm,mRNA cleavage and polyadenylation specificity factor complex	tr;sp	1	2;1	uniprot_mouse_proteome	>tr|D3YX80|D3YX80_MOUSE pre-mRNA 3' end-processing protein WDR33 OS=Mus musculus GN=Wdr33 PE=1 SV=2;>sp|Q8K4P0|WDR33_MOUSE pre-mRNA 3' end processing protein WDR33 OS=Mus musculus GN=Wdr33 PE=1 SV=1	2	2
TRUE	Old_Decellularized / Young_Decellularized	Old_Decellularized	Young_Decellularized	10	D3YY09;D3YYC2;F6T9K1;G3UXH5;Q9D6N5	79545.3	81269.5	0.0309386	0.0309386	2.16766	1.02168	0	0.0664454	0.0489163	9	1.0469	D3YY09;D3YYC2;F6T9K1;G3UXH5;Q9D6N5	D3YY09_MOUSE;D3YYC2_MOUSE;F6T9K1_MOUSE;G3UXH5_MOUSE;NC2A_MOUSE	Dr1-associated corepressor	Drap1	D3YY09;D3YYC2;F6T9K1;G3UXH5;Q9D6N5	Mus musculus	;;;;negative regulation of transcription from RNA polymerase II promoter,transcription, DNA-templated	;;;;DNA binding,transcription corepressor activity,protein binding,transcription factor binding,identical protein binding,protein heterodimerization activity	;;;;nucleus	tr;tr;tr;tr;sp	1	1;1;2;1;3	uniprot_mouse_proteome	>tr|D3YY09|D3YY09_MOUSE Dr1-associated corepressor OS=Mus musculus GN=Drap1 PE=1 SV=1;>tr|D3YYC2|D3YYC2_MOUSE Dr1-associated corepressor OS=Mus musculus GN=Drap1 PE=1 SV=1;>tr|F6T9K1|F6T9K1_MOUSE Dr1-associated corepressor OS=Mus musculus GN=Drap1 PE=1 SV=2;>tr|G3UXH5|G3UXH5_MOUSE Dr1-associated corepressor OS=Mus musculus GN=Drap1 PE=1 SV=1;>sp|Q9D6N5|NC2A_MOUSE Dr1-associated corepressor OS=Mus…	2	2
TRUE	Old_Decellularized / Young_Decellularized	Old_Decellularized	Young_Decellularized	10	D3Z3Q3;Q921U8;Q921U8-2;Q921U8-3;Q921U8-4	83560.3	65041.6	-0.361455	0.361455	-22.1621	0.778379	0	0.0018559	0.00288606	9	0.080932	D3Z3Q3;Q921U8;Q921U8-2;Q921U8-3;Q921U8-4	D3Z3Q3_MOUSE;SMTN_MOUSE;SMTN_MOUSE;SMTN_MOUSE;SMTN_MOUSE	Smoothelin;Smoothelin;Isoform L2 of Smoothelin;Isoform S1 of Smoothelin;Isoform S2 of Smoothelin	Smtn	D3Z3Q3;Q921U8;Q921U8-2;Q921U8-3;Q921U8-4	Mus musculus	;negative regulation of systemic arterial blood pressure,positive regulation of cardiac muscle contraction;;;	;actin binding;;;	;cytoplasm,cytoskeleton;;;	tr;sp;sp;sp;sp	1;1;;;	1;2;;;	uniprot_mouse_proteome	>tr|D3Z3Q3|D3Z3Q3_MOUSE Smoothelin OS=Mus musculus GN=Smtn PE=1 SV=1;>sp|Q921U8|SMTN_MOUSE Smoothelin OS=Mus musculus GN=Smtn PE=1 SV=2;>sp|Q921U8-2|SMTN_MOUSE Isoform L2 of Smoothelin OS=Mus musculus GN=Smtn;>sp|Q921U8-3|SMTN_MOUSE Isoform S1 of Smoothelin OS=Mus musculus GN=Smtn;>sp|Q921U8-4|SMTN_MOUSE Isoform S2 of Smoothelin OS=Mus musculus GN=Smtn	2	2
TRUE	Old_Decellularized / Young_Decellularized	Old_Decellularized	Young_Decellularized	10	D3Z795;D6RG59;Q9JK23	32727	18327.7	-0.836458	0.836458	-43.9983	0.560017	0	0.000792334	0.00141588	9	0.163144	D3Z795;D6RG59;Q9JK23	D3Z795_MOUSE;D6RG59_MOUSE;PSMG1_MOUSE	Proteasome assembly chaperone 1	Psmg1	D3Z795;D6RG59;Q9JK23	Mus musculus	;;cerebellar granule cell precursor proliferation,proteasome assembly,proteasome core complex assembly	;;proteasome binding	;;nucleus,nucleoplasm,cytoplasm,endoplasmic reticulum,Golgi apparatus,cytosol	tr;tr;sp	1	1	uniprot_mouse_proteome	>tr|D3Z795|D3Z795_MOUSE Proteasome assembly chaperone 1 OS=Mus musculus GN=Psmg1 PE=1 SV=1;>tr|D6RG59|D6RG59_MOUSE Proteasome assembly chaperone 1 OS=Mus musculus GN=Psmg1 PE=1 SV=1;>sp|Q9JK23|PSMG1_MOUSE Proteasome assembly chaperone 1 OS=Mus musculus GN=Psmg1 PE=1 SV=1	2	2
TRUE	Old_Decellularized / Young_Decellularized	Old_Decellularized	Young_Decellularized	10	E0CXH4;Q8R1G2	83054.3	116819	0.492149	0.492149	40.6538	1.40654	0	0.13542	0.0837422	9	0.249053	E0CXH4;Q8R1G2	E0CXH4_MOUSE;CMBL_MOUSE	Carboxymethylenebutenolidase homolog (Fragment);Carboxymethylenebutenolidase homolog	Cmbl	E0CXH4;Q8R1G2	Mus musculus	;biological_process	;molecular_function,hydrolase activity	;cytosol,extracellular exosome	tr;sp	1	1	uniprot_mouse_proteome	>tr|E0CXH4|E0CXH4_MOUSE Carboxymethylenebutenolidase homolog (Fragment) OS=Mus musculus GN=Cmbl PE=1 SV=1;>sp|Q8R1G2|CMBL_MOUSE Carboxymethylenebutenolidase homolog OS=Mus musculus GN=Cmbl PE=1 SV=1	2	2
TRUE	Old_Decellularized / Young_Decellularized	Old_Decellularized	Young_Decellularized	10	E9PX94;Q8K1A6	61752	69499.3	0.170512	0.170512	12.5458	1.12546	0	0.140953	0.0862659	9	0.165462	E9PX94;Q8K1A6	E9PX94_MOUSE;C2D1A_MOUSE	Coiled-coil and C2 domain-containing protein 1A	Cc2d1a	E9PX94;Q8K1A6	Mus musculus	;negative regulation of transcription from RNA polymerase II promoter,transcription, DNA-templated,signal transduction,positive regulation of I-kappaB kinase/NF-kappaB signaling	;RNA polymerase II core promoter proximal region sequence-specific DNA binding,transcriptional repressor activity, RNA polymerase II core promoter proximal region sequence-specific binding,signal transducer activity,cadherin binding	;fibrillar center,nucleus,microtubule organizing center,cytosol,plasma membrane,membrane,extracellular exosome	tr;sp	1	2	uniprot_mouse_proteome	>tr|E9PX94|E9PX94_MOUSE Coiled-coil and C2 domain-containing protein 1A OS=Mus musculus GN=Cc2d1a PE=1 SV=2;>sp|Q8K1A6|C2D1A_MOUSE Coiled-coil and C2 domain-containing protein 1A OS=Mus musculus GN=Cc2d1a PE=1 SV=2	2	2
TRUE	Old_Decellularized / Young_Decellularized	Old_Decellularized	Young_Decellularized	10	E9PZM4;G3V014;P40201;Q8C7Q2	86852.9	67722.7	-0.358936	0.358936	-22.026	0.77974	0	0.0397639	0.0328715	9	0.157305	E9PZM4;G3V014;P40201;Q8C7Q2	CHD2_MOUSE;G3V014_MOUSE;CHD1_MOUSE;Q8C7Q2_MOUSE	Chromodomain-helicase-DNA-binding protein 2;Chromodomain-helicase-DNA-binding protein 1 (Fragment);Chromodomain-helicase-DNA-binding protein 1;Chromodomain-helicase-DNA-binding protein 1	Chd2;Chd1;Chd1;Chd1	E9PZM4;G3V014;P40201;Q8C7Q2	Mus musculus	transcription, DNA-templated,regulation of transcription, DNA-templated,cellular response to DNA damage stimulus,muscle organ development,chromatin modification,hematopoietic stem cell differentiation;;chromatin assembly or disassembly,chromatin remodeling,transcription, DNA-templated,regulation of transcription, DNA-templated,chromatin modification,positive regulation by host of viral transcript…	core promoter sequence-specific DNA binding,RNA binding,helicase activity,protein binding,ATP binding,histone binding;;DNA binding,chromatin binding,helicase activity,ATP binding,methylated histone binding;	nucleus,nucleoplasm,nucleolus,intracellular membrane-bounded organelle,extracellular exosome;;fibrillar center,nucleus,cytoplasm;	sp;tr;sp;tr	1	1;1;3;1	uniprot_mouse_proteome	>sp|E9PZM4|CHD2_MOUSE Chromodomain-helicase-DNA-binding protein 2 OS=Mus musculus GN=Chd2 PE=1 SV=1;>tr|G3V014|G3V014_MOUSE Chromodomain-helicase-DNA-binding protein 1 (Fragment) OS=Mus musculus GN=Chd1 PE=1 SV=1;>sp|P40201|CHD1_MOUSE Chromodomain-helicase-DNA-binding protein 1 OS=Mus musculus GN=Chd1 PE=1 SV=3;>tr|Q8C7Q2|Q8C7Q2_MOUSE Chromodomain-helicase-DNA-binding protein 1 OS=Mus musculus GN…	2	2
TRUE	Old_Decellularized / Young_Decellularized	Old_Decellularized	Young_Decellularized	10	E9Q0F0	4011890	2.32512e+06	-0.786974	0.786974	-42.0442	0.579558	0	0.612303	0.25917	9	0.555687	E9Q0F0	E9Q0F0_MOUSE	Protein Krt78	Krt78	E9Q0F0	Mus musculus	biological_process	molecular_function,structural molecule activity	extracellular space,keratin filament,extracellular exosome	tr	1	1	uniprot_mouse_proteome	>tr|E9Q0F0|E9Q0F0_MOUSE Protein Krt78 OS=Mus musculus GN=Krt78 PE=1 SV=1	2	2
TRUE	Old_Decellularized / Young_Decellularized	Old_Decellularized	Young_Decellularized	10	E9Q9B7	37382.3	33400.8	-0.162474	0.162474	-10.6509	0.893491	0	0.180513	0.104089	9	0.110484	E9Q9B7	E9Q9B7_MOUSE	Protein Kidins220	Kidins220	E9Q9B7	Mus musculus	in utero embryonic development,nerve growth factor signaling pathway,regulation of protein kinase activity,dendrite morphogenesis	protein kinase regulator activity,PDZ domain binding	membrane,integral component of membrane	tr	1	1	uniprot_mouse_proteome	>tr|E9Q9B7|E9Q9B7_MOUSE Protein Kidins220 OS=Mus musculus GN=Kidins220 PE=1 SV=1	2	2
TRUE	Old_Decellularized / Young_Decellularized	Old_Decellularized	Young_Decellularized	15	E9QMV2;Q4KML4	128935	146238	0.181669	0.181669	13.4195	1.1342	0	0.878348	0.333522	14	0.214625	E9QMV2;Q4KML4	E9QMV2_MOUSE;ABRAL_MOUSE	Costars family protein ABRACL	Abracl	E9QMV2;Q4KML4	Mus musculus	;biological_process	;molecular_function	;cellular_component	tr;sp	1	1	uniprot_mouse_proteome	>tr|E9QMV2|E9QMV2_MOUSE Costars family protein ABRACL OS=Mus musculus GN=Abracl PE=1 SV=1;>sp|Q4KML4|ABRAL_MOUSE Costars family protein ABRACL OS=Mus musculus GN=Abracl PE=1 SV=1	2	3
TRUE	Old_Decellularized / Young_Decellularized	Old_Decellularized	Young_Decellularized	10	F2Z420;Q91WC0	78516.8	93674.1	0.254651	0.254651	19.3047	1.19305	0	0.250791	0.132947	9	0.216609	F2Z420;Q91WC0	F2Z420_MOUSE;SETD3_MOUSE	Histone-lysine N-methyltransferase setd3	Setd3	F2Z420;Q91WC0	Mus musculus	;transcription, DNA-templated,histone H3-K36 methylation,peptidyl-lysine trimethylation,peptidyl-lysine monomethylation,peptidyl-lysine dimethylation,positive regulation of transcription, DNA-templated,positive regulation of transcription from RNA polymerase II promoter,positive regulation of muscle cell differentiation,histone H3-K4 methylation	;RNA polymerase II activating transcription factor binding,transcription coactivator activity,histone methyltransferase activity (H3-K4 specific),histone methyltransferase activity (H3-K36 specific)	;nuclear chromatin	tr;sp	1	1	uniprot_mouse_proteome	>tr|F2Z420|F2Z420_MOUSE Histone-lysine N-methyltransferase setd3 OS=Mus musculus GN=Setd3 PE=1 SV=1;>sp|Q91WC0|SETD3_MOUSE Histone-lysine N-methyltransferase setd3 OS=Mus musculus GN=Setd3 PE=1 SV=1	2	2
TRUE	Old_Decellularized / Young_Decellularized	Old_Decellularized	Young_Decellularized	15	G3UYV7;P62858	1.85361e+06	2.01534e+06	0.120686	0.120686	8.7252	1.08725	0	0.794707	0.311247	14	0.108734	G3UYV7;P62858	G3UYV7_MOUSE;RS28_MOUSE	40S ribosomal protein S28 (Fragment);40S ribosomal protein S28	Rps28	G3UYV7;P62858	Mus musculus	;ribosomal small subunit assembly,rRNA processing,translation,maturation of SSU-rRNA,ribosome biogenesis,ribosomal small subunit biogenesis	;RNA binding,structural constituent of ribosome	;small ribosomal subunit,cytosolic small ribosomal subunit,extracellular exosome	tr;sp	1	1	uniprot_mouse_proteome	>tr|G3UYV7|G3UYV7_MOUSE 40S ribosomal protein S28 (Fragment) OS=Mus musculus GN=Rps28 PE=1 SV=1;>sp|P62858|RS28_MOUSE 40S ribosomal protein S28 OS=Mus musculus GN=Rps28 PE=1 SV=1	2	3
TRUE	Old_Decellularized / Young_Decellularized	Old_Decellularized	Young_Decellularized	15	I3ITR1;Q9D924	65069	75856.7	0.221305	0.221305	16.5787	1.16579	0	0.0339349	0.0290724	14	0.144364	I3ITR1;Q9D924	I3ITR1_MOUSE;ISCA1_MOUSE	MCG50313;Iron-sulfur cluster assembly 1 homolog, mitochondrial	AK157302;Isca1	I3ITR1;Q9D924	Mus musculus	iron-sulfur cluster assembly,protein maturation by iron-sulfur cluster transfer;iron-sulfur cluster assembly,protein maturation by iron-sulfur cluster transfer	structural molecule activity,ferrous iron binding,2 iron, 2 sulfur cluster binding;structural molecule activity,ferrous iron binding,2 iron, 2 sulfur cluster binding	mitochondrion,mitochondrial matrix;mitochondrion,mitochondrial matrix	tr;sp	4;2	1	uniprot_mouse_proteome	>tr|I3ITR1|I3ITR1_MOUSE MCG50313 OS=Mus musculus GN=AK157302 PE=4 SV=1;>sp|Q9D924|ISCA1_MOUSE Iron-sulfur cluster assembly 1 homolog, mitochondrial OS=Mus musculus GN=Isca1 PE=2 SV=1	2	3
TRUE	Old_Decellularized / Young_Decellularized	Old_Decellularized	Young_Decellularized	20	P01887	226580	383408	0.758856	0.758856	69.2148	1.69215	0	0.00109523	0.00186373	19	0.333724	P01887	B2MG_MOUSE	Beta-2-microglobulin	B2m	P01887	Mus musculus	retina homeostasis,positive regulation of T cell mediated cytotoxicity,response to molecule of bacterial origin,antigen processing and presentation of exogenous protein antigen via MHC class Ib, TAP-dependent,positive regulation of T cell cytokine production,iron ion transport,immune response,cellular defense response,negative regulation of neuron projection development,antigen processing and pre…	protein binding,identical protein binding	extracellular space,Golgi apparatus,cytosol,plasma membrane,focal adhesion,external side of plasma membrane,membrane,phagocytic vesicle membrane,MHC class I protein complex,extracellular exosome,HFE-transferrin receptor complex	sp	1	2	uniprot_mouse_proteome	>sp|P01887|B2MG_MOUSE Beta-2-microglobulin OS=Mus musculus GN=B2m PE=1 SV=2	2	4
TRUE	Old_Decellularized / Young_Decellularized	Old_Decellularized	Young_Decellularized	10	P14106	55018.4	70204.7	0.351652	0.351652	27.6021	1.27602	0	0.0230855	0.0217827	9	0.184085	P14106	C1QB_MOUSE	Complement C1q subcomponent subunit B	C1qb	P14106	Mus musculus	complement activation, classical pathway,innate immune response,inner ear development	protein homodimerization activity	collagen trimer,extracellular space,extracellular exosome,blood microparticle	sp	1	2	uniprot_mouse_proteome	>sp|P14106|C1QB_MOUSE Complement C1q subcomponent subunit B OS=Mus musculus GN=C1qb PE=1 SV=2	2	2
TRUE	Old_Decellularized / Young_Decellularized	Old_Decellularized	Young_Decellularized	10	P27786	31465.3	23290.6	-0.43401	0.43401	-25.9799	0.740201	0	0.475267	0.215632	9	0.591076	P27786	CP17A_MOUSE	Steroid 17-alpha-hydroxylase/17,20 lyase	Cyp17a1	P27786	Mus musculus	glucocorticoid biosynthetic process,steroid metabolic process,hormone biosynthetic process,progesterone metabolic process,oxidation-reduction process	steroid 17-alpha-monooxygenase activity,iron ion binding,heme binding,17-alpha-hydroxyprogesterone aldolase activity	mitochondrion,membrane,axon,neuronal cell body	sp	1	1	uniprot_mouse_proteome	>sp|P27786|CP17A_MOUSE Steroid 17-alpha-hydroxylase/17,20 lyase OS=Mus musculus GN=Cyp17a1 PE=1 SV=1	2	2
TRUE	Old_Decellularized / Young_Decellularized	Old_Decellularized	Young_Decellularized	10	P27808	75505.6	79594.8	0.0760909	0.0760909	5.41578	1.05416	0	0.854236	0.327369	9	0.102669	P27808	MGAT1_MOUSE	Alpha-1,3-mannosyl-glycoprotein 2-beta-N-acetylglucosaminyltransferase	Mgat1	P27808	Mus musculus	in utero embryonic development,UDP-N-acetylglucosamine catabolic process,protein glycosylation	alpha-1,3-mannosylglycoprotein 2-beta-N-acetylglucosaminyltransferase activity,acetylglucosaminyltransferase activity,metal ion binding	Golgi membrane,membrane,integral component of membrane,extracellular exosome,extracellular vesicle	sp	1	1	uniprot_mouse_proteome	>sp|P27808|MGAT1_MOUSE Alpha-1,3-mannosyl-glycoprotein 2-beta-N-acetylglucosaminyltransferase OS=Mus musculus GN=Mgat1 PE=1 SV=1	2	2
TRUE	Old_Decellularized / Young_Decellularized	Old_Decellularized	Young_Decellularized	10	P28665;P28666	71110.5	90001.3	0.339884	0.339884	26.5655	1.26565	0	0.101355	0.0672256	9	0.263502	P28665;P28666	MUG1_MOUSE;MUG2_MOUSE	Murinoglobulin-1;Murinoglobulin-2	Mug1;Mug2	P28665;P28666	Mus musculus	embryo implantation,negative regulation of endopeptidase activity;negative regulation of endopeptidase activity	serine-type endopeptidase inhibitor activity;serine-type endopeptidase inhibitor activity	extracellular space;extracellular space	sp	1	3;2	uniprot_mouse_proteome	>sp|P28665|MUG1_MOUSE Murinoglobulin-1 OS=Mus musculus GN=Mug1 PE=1 SV=3;>sp|P28666|MUG2_MOUSE Murinoglobulin-2 OS=Mus musculus GN=Mug2 PE=1 SV=2	2	2
TRUE	Old_Decellularized / Young_Decellularized	Old_Decellularized	Young_Decellularized	10	P63002;P63002-2	59646	86437.1	0.535224	0.535224	44.9167	1.44917	0	0.0112725	0.0126671	9	0.262304	P63002;P63002-2	AES_MOUSE	Amino-terminal enhancer of split;Isoform 2 of Amino-terminal enhancer of split	Aes	P63002;P63002-2	Mus musculus	negative regulation of transcription from RNA polymerase II promoter,skeletal system development,transcription, DNA-templated,regulation of transcription from RNA polymerase II promoter,negative regulation of gene expression,Wnt signaling pathway,cellular response to extracellular stimulus,negative regulation of protein binding,regulation of growth,negative regulation of transcription, DNA-templa…	transcription corepressor activity,protein binding;	nucleus,nucleoplasm;	sp	1;	1;	uniprot_mouse_proteome	>sp|P63002|AES_MOUSE Amino-terminal enhancer of split OS=Mus musculus GN=Aes PE=1 SV=1;>sp|P63002-2|AES_MOUSE Isoform 2 of Amino-terminal enhancer of split OS=Mus musculus GN=Aes	2	2
TRUE	Old_Decellularized / Young_Decellularized	Old_Decellularized	Young_Decellularized	10	P70268;P70268-2	58548.8	55197.4	-0.0850401	0.0850401	-5.72417	0.942758	0	0.390454	0.186154	9	0.0950415	P70268;P70268-2	PKN1_MOUSE	Serine/threonine-protein kinase N1;Isoform 2 of Serine/threonine-protein kinase N1	Pkn1	P70268;P70268-2	Mus musculus	B cell homeostasis,B cell apoptotic process,negative regulation of protein phosphorylation,regulation of germinal center formation,regulation of immunoglobulin production,renal system process,transcription, DNA-templated,regulation of transcription from RNA polymerase II promoter,protein phosphorylation,negative regulation of protein kinase activity,hyperosmotic response,epithelial cell migration…	chromatin binding,protein kinase activity,protein serine/threonine kinase activity,protein kinase C activity,protein kinase C binding,protein binding,ATP binding,GTP-Rho binding,ligand-dependent nuclear receptor transcription coactivator activity,histone kinase activity (H3-T11 specific),histone binding,histone deacetylase binding,Rac GTPase binding,androgen receptor binding;	nucleus,cytoplasm,endosome,plasma membrane,midbody,cytoplasmic vesicle,cleavage furrow,protein complex;	sp	1;	3;	uniprot_mouse_proteome	>sp|P70268|PKN1_MOUSE Serine/threonine-protein kinase N1 OS=Mus musculus GN=Pkn1 PE=1 SV=3;>sp|P70268-2|PKN1_MOUSE Isoform 2 of Serine/threonine-protein kinase N1 OS=Mus musculus GN=Pkn1	2	2
TRUE	Old_Decellularized / Young_Decellularized	Old_Decellularized	Young_Decellularized	10	Q3U4I7	35877.7	55706.8	0.634766	0.634766	55.2686	1.55269	0	0.00605379	0.00767351	9	0.199443	Q3U4I7	PYRD2_MOUSE	Pyridine nucleotide-disulfide oxidoreductase domain-containing protein 2	Pyroxd2	Q3U4I7	Mus musculus	oxidation-reduction process	oxidoreductase activity	intracellular	sp	1	3	uniprot_mouse_proteome	>sp|Q3U4I7|PYRD2_MOUSE Pyridine nucleotide-disulfide oxidoreductase domain-containing protein 2 OS=Mus musculus GN=Pyroxd2 PE=1 SV=3	2	2
TRUE	Old_Decellularized / Young_Decellularized	Old_Decellularized	Young_Decellularized	10	Q59J78	92235.4	97762.6	0.0839616	0.0839616	5.99246	1.05992	0	0.667992	0.275784	9	0.361315	Q59J78	MIMIT_MOUSE	Mimitin, mitochondrial	Ndufaf2	Q59J78	Mus musculus	respiratory electron transport chain,cellular respiration,negative regulation of insulin secretion involved in cellular response to glucose stimulus,reactive oxygen species metabolic process	NADH dehydrogenase (ubiquinone) activity,electron carrier activity	mitochondrion,membrane	sp	1	1	uniprot_mouse_proteome	>sp|Q59J78|MIMIT_MOUSE Mimitin, mitochondrial OS=Mus musculus GN=Ndufaf2 PE=1 SV=1	2	2
TRUE	Old_Decellularized / Young_Decellularized	Old_Decellularized	Young_Decellularized	10	Q61559;Q6PKB0	63547	99757.1	0.650596	0.650596	56.9816	1.56982	0	0.000559171	0.00105334	9	0.139299	Q61559;Q6PKB0	FCGRN_MOUSE;Q6PKB0_MOUSE	IgG receptor FcRn large subunit p51;Fcgrt protein	Fcgrt	Q61559;Q6PKB0	Mus musculus	Fc-gamma receptor signaling pathway;	IgG receptor activity,IgG binding,beta-2-microglobulin binding,peptide antigen binding;	plasma membrane,integral component of membrane;	sp;tr	1	1	uniprot_mouse_proteome	>sp|Q61559|FCGRN_MOUSE IgG receptor FcRn large subunit p51 OS=Mus musculus GN=Fcgrt PE=1 SV=1;>tr|Q6PKB0|Q6PKB0_MOUSE Fcgrt protein OS=Mus musculus GN=Fcgrt PE=1 SV=1	2	2
TRUE	Old_Decellularized / Young_Decellularized	Old_Decellularized	Young_Decellularized	10	Q62018;Q62018-2;Q62018-3	53940.4	41227.4	-0.387763	0.387763	-23.5686	0.764314	0	0.0572595	0.0436875	9	0.166968	Q62018;Q62018-2;Q62018-3	CTR9_MOUSE	RNA polymerase-associated protein CTR9 homolog;Isoform 2 of RNA polymerase-associated protein CTR9 homolog;Isoform 3 of RNA polymerase-associated protein CTR9 homolog	Ctr9	Q62018;Q62018-2;Q62018-3	Mus musculus	negative regulation of transcription from RNA polymerase II promoter,endodermal cell fate commitment,inner cell mass cell differentiation,trophectodermal cell differentiation,blastocyst growth,transcription, DNA-templated,JAK-STAT cascade,histone monoubiquitination,Wnt signaling pathway,stem cell population maintenance,positive regulation of transcription elongation from RNA polymerase II promote…	RNA polymerase II core binding,protein binding,SH2 domain binding;;	nucleus,nucleoplasm,Cdc73/Paf1 complex,nuclear speck,transcriptionally active chromatin;;	sp	1;;	2;;	uniprot_mouse_proteome	>sp|Q62018|CTR9_MOUSE RNA polymerase-associated protein CTR9 homolog OS=Mus musculus GN=Ctr9 PE=1 SV=2;>sp|Q62018-2|CTR9_MOUSE Isoform 2 of RNA polymerase-associated protein CTR9 homolog OS=Mus musculus GN=Ctr9;>sp|Q62018-3|CTR9_MOUSE Isoform 3 of RNA polymerase-associated protein CTR9 homolog OS=Mus musculus GN=Ctr9	2	2
TRUE	Old_Decellularized / Young_Decellularized	Old_Decellularized	Young_Decellularized	10	Q63829	55326.7	55818.7	0.0127727	0.0127727	0.88927	1.00889	0	0.630658	0.265146	9	0.0278562	Q63829	COMD3_MOUSE	COMM domain-containing protein 3	Commd3	Q63829	Mus musculus	transcription, DNA-templated,regulation of transcription, DNA-templated,sodium ion transport,biological_process	molecular_function	cellular_component,nucleus,cytoplasm	sp	1	1	uniprot_mouse_proteome	>sp|Q63829|COMD3_MOUSE COMM domain-containing protein 3 OS=Mus musculus GN=Commd3 PE=1 SV=1	2	2
TRUE	Old_Decellularized / Young_Decellularized	Old_Decellularized	Young_Decellularized	10	Q80V26	67771.5	66371.1	-0.0301242	0.0301242	-2.0664	0.979336	0	0.716839	0.289825	9	0.20077	Q80V26	IMPA3_MOUSE	Inositol monophosphatase 3	Impad1	Q80V26	Mus musculus	skeletal system development,endochondral ossification,chondrocyte development,inositol biosynthetic process,post-embryonic development,dephosphorylation,chondroitin sulfate metabolic process,embryonic digit morphogenesis,phosphatidylinositol phosphorylation	3'-nucleotidase activity,3'(2'),5'-bisphosphate nucleotidase activity,inositol monophosphate 1-phosphatase activity,metal ion binding,inositol monophosphate 3-phosphatase activity,inositol monophosphate 4-phosphatase activity	nucleus,Golgi apparatus,cytosol,membrane,integral component of membrane,nuclear body	sp	1	1	uniprot_mouse_proteome	>sp|Q80V26|IMPA3_MOUSE Inositol monophosphatase 3 OS=Mus musculus GN=Impad1 PE=1 SV=1	2	2
TRUE	Old_Decellularized / Young_Decellularized	Old_Decellularized	Young_Decellularized	10	Q8BGX2	62224.2	75032.3	0.270036	0.270036	20.5838	1.20584	0	0.0102055	0.0117269	9	0.0836405	Q8BGX2	CS052_MOUSE	Uncharacterized protein C19orf52 homolog	NaN	Q8BGX2	Mus musculus	protein import into mitochondrial inner membrane	molecular_function	mitochondrial inner membrane,mitochondrial intermembrane space,integral component of membrane,mitochondrial inner membrane protein insertion complex	sp	1	1	uniprot_mouse_proteome	>sp|Q8BGX2|CS052_MOUSE Uncharacterized protein C19orf52 homolog OS=Mus musculus PE=1 SV=1	2	2
TRUE	Old_Decellularized / Young_Decellularized	Old_Decellularized	Young_Decellularized	10	Q8BHC7	81040.7	71764.8	-0.175369	0.175369	-11.4459	0.885541	0	0.0638615	0.0474117	9	0.0839085	Q8BHC7	RHBL4_MOUSE	Rhomboid-related protein 4	Rhbdd1	Q8BHC7	Mus musculus	apoptotic process,positive regulation of protein processing,membrane protein intracellular domain proteolysis,membrane protein proteolysis,cellular response to unfolded protein,cellular response to UV,ERAD pathway,negative regulation of apoptotic process,post-translational protein modification,positive regulation of protein catabolic process,spermatid differentiation,positive regulation of secret…	endopeptidase activity,serine-type endopeptidase activity,protein binding,peptidase activity	mitochondrion,endoplasmic reticulum,endoplasmic reticulum membrane,integral component of endoplasmic reticulum membrane,endoplasmic reticulum quality control compartment	sp	1	1	uniprot_mouse_proteome	>sp|Q8BHC7|RHBL4_MOUSE Rhomboid-related protein 4 OS=Mus musculus GN=Rhbdd1 PE=1 SV=1	2	2
TRUE	Old_Decellularized / Young_Decellularized	Old_Decellularized	Young_Decellularized	10	Q8BN57	108860	129349	0.2488	0.2488	18.8218	1.18822	0	0.065835	0.0486681	9	0.117672	Q8BN57	CC033_MOUSE	Protein C3orf33 homolog	NaN	Q8BN57	Mus musculus	regulation of MAPK cascade,regulation of sequence-specific DNA binding transcription factor activity,negative regulation of ERK1 and ERK2 cascade	molecular_function	extracellular space,integral component of membrane	sp	2	1	uniprot_mouse_proteome	>sp|Q8BN57|CC033_MOUSE Protein C3orf33 homolog OS=Mus musculus PE=2 SV=1	2	2
TRUE	Old_Decellularized / Young_Decellularized	Old_Decellularized	Young_Decellularized	10	Q8CIB6	113273	119607	0.0784912	0.0784912	5.59131	1.05591	0	0.132655	0.0824612	9	0.0867255	Q8CIB6	TM230_MOUSE	Transmembrane protein 230	Tmem230	Q8CIB6	Mus musculus	synaptic vesicle transport	molecular_function	early endosome,late endosome,autophagosome,endoplasmic reticulum,trans-Golgi network,synaptic vesicle,integral component of membrane,cell junction,recycling endosome	sp	1	1	uniprot_mouse_proteome	>sp|Q8CIB6|TM230_MOUSE Transmembrane protein 230 OS=Mus musculus GN=Tmem230 PE=1 SV=1	2	2
TRUE	Old_Decellularized / Young_Decellularized	Old_Decellularized	Young_Decellularized	10	Q8R4H9	110976	93995.6	-0.239582	0.239582	-15.3009	0.846991	0	0.0126925	0.0137871	9	0.0724175	Q8R4H9	ZNT5_MOUSE	Zinc transporter 5	Slc30a5	Q8R4H9	Mus musculus	cobalt ion transport,zinc II ion transport,cellular zinc ion homeostasis,response to zinc ion,regulation of sequestering of zinc ion,zinc II ion transmembrane transport	zinc ion transmembrane transporter activity	nucleus,nucleolus,Golgi apparatus,membrane,integral component of membrane,apical plasma membrane,secretory granule	sp	1	1	uniprot_mouse_proteome	>sp|Q8R4H9|ZNT5_MOUSE Zinc transporter 5 OS=Mus musculus GN=Slc30a5 PE=1 SV=1	2	2
TRUE	Old_Decellularized / Young_Decellularized	Old_Decellularized	Young_Decellularized	10	Q9D0S9	105118	121181	0.205156	0.205156	15.2811	1.15281	0	0.508575	0.226139	9	0.282157	Q9D0S9	HINT2_MOUSE	Histidine triad nucleotide-binding protein 2, mitochondrial	Hint2	Q9D0S9	Mus musculus	steroid biosynthetic process,apoptotic process,multicellular organism lipid catabolic process,negative regulation of peptidyl-lysine acetylation	nucleotide binding,hydrolase activity	nucleolus,mitochondrion	sp	1	1	uniprot_mouse_proteome	>sp|Q9D0S9|HINT2_MOUSE Histidine triad nucleotide-binding protein 2, mitochondrial OS=Mus musculus GN=Hint2 PE=1 SV=1	2	2
TRUE	Old_Decellularized / Young_Decellularized	Old_Decellularized	Young_Decellularized	10	Q9JJE7	106119	105725	-0.00537196	0.00537196	-0.371664	0.996283	0	0.860565	0.329264	9	0.220272	Q9JJE7	FADS3_MOUSE	Fatty acid desaturase 3	Fads3	Q9JJE7	Mus musculus	fatty acid biosynthetic process,biological_process,oxidation-reduction process	oxidoreductase activity	cellular_component,endoplasmic reticulum membrane,integral component of membrane	sp	2	2	uniprot_mouse_proteome	>sp|Q9JJE7|FADS3_MOUSE Fatty acid desaturase 3 OS=Mus musculus GN=Fads3 PE=2 SV=2	2	2
TRUE	Old_Decellularized / Young_Decellularized	Old_Decellularized	Young_Decellularized	10	Q9Z2A9;Q9Z2A9-2	35997.5	70113.6	0.961799	0.961799	94.7737	1.94774	0	0.0119491	0.0131685	9	0.890895	Q9Z2A9;Q9Z2A9-2	GGT5_MOUSE	Gamma-glutamyltransferase 5;Isoform 2 of Gamma-glutamyltransferase 5	Ggt5	Q9Z2A9;Q9Z2A9-2	Mus musculus	translation,proteolysis,cellular amino acid metabolic process,fatty acid metabolic process,glutathione biosynthetic process,glutathione catabolic process,inflammatory response,leukotriene D4 biosynthetic process;	peptidyltransferase activity,Requires Ontology,glutathione hydrolase activity;	plasma membrane,integral component of membrane,intrinsic component of plasma membrane;	sp	1;	2;	uniprot_mouse_proteome	>sp|Q9Z2A9|GGT5_MOUSE Gamma-glutamyltransferase 5 OS=Mus musculus GN=Ggt5 PE=1 SV=2;>sp|Q9Z2A9-2|GGT5_MOUSE Isoform 2 of Gamma-glutamyltransferase 5 OS=Mus musculus GN=Ggt5	2	2
TRUE	Old_Decellularized / Young_Decellularized	Old_Decellularized	Young_Decellularized	10	Q9Z2M7	73523.3	82177.7	0.160546	0.160546	11.771	1.11771	0	0.115863	0.0741799	9	0.0823711	Q9Z2M7	PMM2_MOUSE	Phosphomannomutase 2	Pmm2	Q9Z2M7	Mus musculus	mannose metabolic process,protein N-linked glycosylation,GDP-mannose biosynthetic process,protein targeting to ER	phosphomannomutase activity	nucleus,cytoplasm,cytosol,neuronal cell body,extracellular exosome	sp	1	1	uniprot_mouse_proteome	>sp|Q9Z2M7|PMM2_MOUSE Phosphomannomutase 2 OS=Mus musculus GN=Pmm2 PE=1 SV=1	2	2
TRUE	Old_Decellularized / Young_Decellularized	Old_Decellularized	Young_Decellularized	10	A0A0A6YX50;P51175	118704	91792.5	-0.370923	0.370923	-22.6713	0.773287	0	0.0812893	0.0567949	9	0.1774	A0A0A6YX50;P51175	A0A0A6YX50_MOUSE;PPOX_MOUSE	Protoporphyrinogen oxidase (Fragment);Protoporphyrinogen oxidase	Ppox	A0A0A6YX50;P51175	Mus musculus	;porphyrin-containing compound biosynthetic process,protoporphyrinogen IX biosynthetic process,heme biosynthetic process,response to drug,oxidation-reduction process	;oxygen-dependent protoporphyrinogen oxidase activity	;mitochondrion,intrinsic component of mitochondrial inner membrane,integral component of mitochondrial inner membrane,mitochondrial membrane	tr;sp	1	1	uniprot_mouse_proteome	>tr|A0A0A6YX50|A0A0A6YX50_MOUSE Protoporphyrinogen oxidase (Fragment) OS=Mus musculus GN=Ppox PE=1 SV=1;>sp|P51175|PPOX_MOUSE Protoporphyrinogen oxidase OS=Mus musculus GN=Ppox PE=1 SV=1	2	2
TRUE	Old_Decellularized / Young_Decellularized	Old_Decellularized	Young_Decellularized	10	A0A0N5E9G7;G3UWX1;G3X8Z6;P35601;P35601-2;Q5U4B1	18519.7	10243	-0.854416	0.854416	-44.6911	0.553089	0	0.0780263	0.0551609	9	0.34794	A0A0N5E9G7;G3UWX1;G3X8Z6;P35601;P35601-2;Q5U4B1	A0A0N5E9G7_MOUSE;G3UWX1_MOUSE;G3X8Z6_MOUSE;RFC1_MOUSE;RFC1_MOUSE;Q5U4B1_MOUSE	Replication factor C subunit 1;Replication factor C subunit 1;Replication factor C 1, isoform CRA_c;Replication factor C subunit 1;Isoform 2 of Replication factor C subunit 1;Replication factor C subunit 1	Rfc1	A0A0N5E9G7;G3UWX1;G3X8Z6;P35601;P35601-2;Q5U4B1	Mus musculus	;;;DNA replication,DNA repair,transcription, DNA-templated,regulation of transcription, DNA-templated;;	;;;DNA binding,DNA clamp loader activity,ATP binding;;	;;;nucleus,nucleoplasm,DNA replication factor C complex,extracellular exosome;;	tr;tr;tr;sp;sp;tr	1;1;1;1;;1	1;2;1;2;;1	uniprot_mouse_proteome	>tr|A0A0N5E9G7|A0A0N5E9G7_MOUSE Replication factor C subunit 1 OS=Mus musculus GN=Rfc1 PE=1 SV=1;>tr|G3UWX1|G3UWX1_MOUSE Replication factor C subunit 1 OS=Mus musculus GN=Rfc1 PE=1 SV=2;>tr|G3X8Z6|G3X8Z6_MOUSE Replication factor C 1, isoform CRA_c OS=Mus musculus GN=Rfc1 PE=1 SV=1;>sp|P35601|RFC1_MOUSE Replication factor C subunit 1 OS=Mus musculus GN=Rfc1 PE=1 SV=2;>sp|P35601-2|RFC1_MOUSE Isofor…	2	2
TRUE	Old_Decellularized / Young_Decellularized	Old_Decellularized	Young_Decellularized	10	A0A0U1RNX8;O08664	149072	135959	-0.132842	0.132842	-8.79668	0.912033	0	0.268752	0.140381	9	0.115754	A0A0U1RNX8;O08664	A0A0U1RNX8_MOUSE;BCL7C_MOUSE	B-cell CLL/lymphoma 7 protein family member C	Bcl7c	A0A0U1RNX8;O08664	Mus musculus	;apoptotic process,biological_process	;molecular_function	;cellular_component	tr;sp	1	1	uniprot_mouse_proteome	>tr|A0A0U1RNX8|A0A0U1RNX8_MOUSE B-cell CLL/lymphoma 7 protein family member C OS=Mus musculus GN=Bcl7c PE=1 SV=1;>sp|O08664|BCL7C_MOUSE B-cell CLL/lymphoma 7 protein family member C OS=Mus musculus GN=Bcl7c PE=1 SV=1	2	2
TRUE	Old_Decellularized / Young_Decellularized	Old_Decellularized	Young_Decellularized	10	B9EJR8	65615.1	43909.1	-0.579506	0.579506	-33.0807	0.669193	0	3.02534e-05	8.59389e-05	9	0.0772931	B9EJR8	DAAF5_MOUSE	Dynein assembly factor 5, axonemal	Dnaaf5	B9EJR8	Mus musculus	cilium movement,outer dynein arm assembly,inner dynein arm assembly	dynein intermediate chain binding	cytoplasm,motile cilium	sp	1	1	uniprot_mouse_proteome	>sp|B9EJR8|DAAF5_MOUSE Dynein assembly factor 5, axonemal OS=Mus musculus GN=Dnaaf5 PE=1 SV=1	2	2
TRUE	Old_Decellularized / Young_Decellularized	Old_Decellularized	Young_Decellularized	10	D3YTP3	85943.6	105414	0.294604	0.294604	22.6548	1.22655	0	0.172214	0.10077	9	0.216463	D3YTP3	D3YTP3_MOUSE	Protein Mtx3	Mtx3	D3YTP3	Mus musculus	protein targeting to mitochondrion,biological_process	molecular_function	cellular_component,mitochondrial outer membrane	tr	1	2	uniprot_mouse_proteome	>tr|D3YTP3|D3YTP3_MOUSE Protein Mtx3 OS=Mus musculus GN=Mtx3 PE=1 SV=2	2	2
TRUE	Old_Decellularized / Young_Decellularized	Old_Decellularized	Young_Decellularized	10	E9Q7A5;E9Q8R5;Q99JY4	110113	130245	0.242238	0.242238	18.2826	1.18283	0	0.0720797	0.0518857	9	0.112503	E9Q7A5;E9Q8R5;Q99JY4	E9Q7A5_MOUSE;E9Q8R5_MOUSE;TRABD_MOUSE	TraB domain-containing protein (Fragment);TraB domain-containing protein;TraB domain-containing protein	Trabd	E9Q7A5;E9Q8R5;Q99JY4	Mus musculus	;;biological_process	;;molecular_function	;;cellular_component	tr;tr;sp	1	8;1;1	uniprot_mouse_proteome	>tr|E9Q7A5|E9Q7A5_MOUSE TraB domain-containing protein (Fragment) OS=Mus musculus GN=Trabd PE=1 SV=8;>tr|E9Q8R5|E9Q8R5_MOUSE TraB domain-containing protein OS=Mus musculus GN=Trabd PE=1 SV=1;>sp|Q99JY4|TRABD_MOUSE TraB domain-containing protein OS=Mus musculus GN=Trabd PE=1 SV=1	2	2
TRUE	Old_Decellularized / Young_Decellularized	Old_Decellularized	Young_Decellularized	10	E9QNR6;Q8VD62	141772	127790	-0.149798	0.149798	-9.86231	0.901377	0	0.833012	0.322092	9	0.101217	E9QNR6;Q8VD62	E9QNR6_MOUSE;CK068_MOUSE	Protein AI837181;UPF0696 protein C11orf68 homolog	AI837181;Bles03	E9QNR6;Q8VD62	Mus musculus	;biological_process	;RNA binding	;cellular_component	tr;sp	1	1	uniprot_mouse_proteome	>tr|E9QNR6|E9QNR6_MOUSE Protein AI837181 OS=Mus musculus GN=AI837181 PE=1 SV=1;>sp|Q8VD62|CK068_MOUSE UPF0696 protein C11orf68 homolog OS=Mus musculus GN=Bles03 PE=1 SV=1	2	2
TRUE	Old_Decellularized / Young_Decellularized	Old_Decellularized	Young_Decellularized	10	F2Z4A2;Q9JHH9	105123	92972.7	-0.1772	0.1772	-11.5582	0.884418	0	0.0529878	0.0411326	9	0.0880918	F2Z4A2;Q9JHH9	F2Z4A2_MOUSE;COPZ2_MOUSE	Coatomer subunit zeta-2	Copz2	F2Z4A2;Q9JHH9	Mus musculus	;biological_process,protein transport,vesicle-mediated transport	;molecular_function	;Golgi membrane,cytosol,COPI vesicle coat,COPI-coated vesicle,endoplasmic reticulum-Golgi intermediate compartment membrane	tr;sp	1	1	uniprot_mouse_proteome	>tr|F2Z4A2|F2Z4A2_MOUSE Coatomer subunit zeta-2 OS=Mus musculus GN=Copz2 PE=1 SV=1;>sp|Q9JHH9|COPZ2_MOUSE Coatomer subunit zeta-2 OS=Mus musculus GN=Copz2 PE=1 SV=1	2	2
TRUE	Old_Decellularized / Young_Decellularized	Old_Decellularized	Young_Decellularized	10	F7DF70;Q7TSH2	19369.3	18699.8	-0.0507541	0.0507541	-3.45685	0.965432	0	0.745341	0.297886	9	0.217702	F7DF70;Q7TSH2	F7DF70_MOUSE;KPBB_MOUSE	Phosphorylase b kinase regulatory subunit beta (Fragment);Phosphorylase b kinase regulatory subunit beta	Phkb	F7DF70;Q7TSH2	Mus musculus	;glycogen metabolic process,protein phosphorylation	;calmodulin binding,phosphorylase kinase activity	;plasma membrane,phosphorylase kinase complex	tr;sp	1	1	uniprot_mouse_proteome	>tr|F7DF70|F7DF70_MOUSE Phosphorylase b kinase regulatory subunit beta (Fragment) OS=Mus musculus GN=Phkb PE=1 SV=1;>sp|Q7TSH2|KPBB_MOUSE Phosphorylase b kinase regulatory subunit beta OS=Mus musculus GN=Phkb PE=1 SV=1	2	2
TRUE	Old_Decellularized / Young_Decellularized	Old_Decellularized	Young_Decellularized	10	G3UZW8;P28063	79933.9	96039	0.264814	0.264814	20.1481	1.20148	0	0.125607	0.0790446	9	0.212319	G3UZW8;P28063	G3UZW8_MOUSE;PSB8_MOUSE	Proteasome subunit beta type (Fragment);Proteasome subunit beta type-8	Psmb8	G3UZW8;P28063	Mus musculus	;antigen processing and presentation,fat cell differentiation,proteolysis involved in cellular protein catabolic process,regulation of endopeptidase activity	;threonine-type endopeptidase activity	;proteasome complex,nucleus,cytosol,proteasome core complex,proteasome core complex, beta-subunit complex,extracellular exosome,spermatoproteasome complex	tr;sp	1	2	uniprot_mouse_proteome	>tr|G3UZW8|G3UZW8_MOUSE Proteasome subunit beta type (Fragment) OS=Mus musculus GN=Psmb8 PE=1 SV=2;>sp|P28063|PSB8_MOUSE Proteasome subunit beta type-8 OS=Mus musculus GN=Psmb8 PE=1 SV=2	2	2
TRUE	Old_Decellularized / Young_Decellularized	Old_Decellularized	Young_Decellularized	10	O88342	156016	129953	-0.263702	0.263702	-16.7052	0.832948	0	0.147238	0.0896507	9	0.145875	O88342	WDR1_MOUSE	WD repeat-containing protein 1	Wdr1	O88342	Mus musculus	neutrophil mediated immunity,sensory perception of sound,regulation of cell shape,actin cytoskeleton organization,actin filament fragmentation,platelet formation,regulation of actin filament depolymerization,positive regulation of actin filament depolymerization,cortical cytoskeleton organization,establishment of planar polarity of follicular epithelium,apical junction assembly,maintenance of epi…	actin binding,actin filament binding	podosome,cytosol,cell-cell junction,actin cytoskeleton,cortical actin cytoskeleton,actomyosin, actin portion,cell projection,myelin sheath,extracellular exosome,actin filament	sp	1	3	uniprot_mouse_proteome	>sp|O88342|WDR1_MOUSE WD repeat-containing protein 1 OS=Mus musculus GN=Wdr1 PE=1 SV=3	2	2
TRUE	Old_Decellularized / Young_Decellularized	Old_Decellularized	Young_Decellularized	10	O89051	33630.7	58197.5	0.791181	0.791181	73.049	1.73049	0	5.58048e-05	0.000146552	9	0.120713	O89051	ITM2B_MOUSE	Integral membrane protein 2B	Itm2b	O89051	Mus musculus	nervous system development,negative regulation of amyloid precursor protein biosynthetic process	beta-amyloid binding,ATP binding	Golgi membrane,extracellular space,Golgi apparatus,plasma membrane,endosome membrane,membrane,Golgi-associated vesicle membrane,integral component of organelle membrane,intracellular membrane-bounded organelle,extracellular exosome	sp	1	1	uniprot_mouse_proteome	>sp|O89051|ITM2B_MOUSE Integral membrane protein 2B OS=Mus musculus GN=Itm2b PE=1 SV=1	2	2
TRUE	Old_Decellularized / Young_Decellularized	Old_Decellularized	Young_Decellularized	10	P04441;P04441-2	32323.7	60361.7	0.901041	0.901041	86.7413	1.86741	0	0.00333187	0.00467183	9	0.273988	P04441;P04441-2	HG2A_MOUSE	H-2 class II histocompatibility antigen gamma chain;Isoform Short of H-2 class II histocompatibility antigen gamma chain	Cd74	P04441;P04441-2	Mus musculus	activation of MAPK activity,prostaglandin biosynthetic process,positive regulation of protein phosphorylation,positive regulation of cytokine-mediated signaling pathway,positive regulation of dendritic cell antigen processing and presentation,negative regulation of peptide secretion,positive regulation of adaptive immune response,positive regulation of type 2 immune response,negative regulation o…	beta-amyloid binding,cytokine receptor activity,protein binding,cytokine binding,MHC class II protein complex binding,macrophage migration inhibitory factor binding,MHC class II protein binding,CD4 receptor binding,MHC class II protein binding, via antigen binding groove,protein binding involved in protein folding,nitric-oxide synthase binding;	lysosome,late endosome,multivesicular body,vacuole,endoplasmic reticulum,Golgi apparatus,plasma membrane,integral component of plasma membrane,external side of plasma membrane,cell surface,membrane,integral component of membrane,macrophage migration inhibitory factor receptor complex,NOS2-CD74 complex,extracellular exosome,MHC class II protein complex;	sp	1;	3;	uniprot_mouse_proteome	>sp|P04441|HG2A_MOUSE H-2 class II histocompatibility antigen gamma chain OS=Mus musculus GN=Cd74 PE=1 SV=3;>sp|P04441-2|HG2A_MOUSE Isoform Short of H-2 class II histocompatibility antigen gamma chain OS=Mus musculus GN=Cd74	2	2
TRUE	Old_Decellularized / Young_Decellularized	Old_Decellularized	Young_Decellularized	10	P22724	18032.3	44411	1.30033	1.30033	146.285	2.46285	0	0.00218033	0.003336	9	0.362788	P22724	WNT4_MOUSE	Protein Wnt-4	Wnt4	P22724	Mus musculus	metanephros development,branching involved in ureteric bud morphogenesis,mesonephros development,epithelial to mesenchymal transition,embryonic epithelial tube formation,liver development,androgen biosynthetic process,signal transduction,cell-cell signaling,gamete generation,sex differentiation,male gonad development,female gonad development,cellular response to starvation,negative regulation of …	transcription corepressor activity,receptor binding,frizzled binding,protein binding	extracellular region,proteinaceous extracellular matrix,extracellular space,cytoplasm,endoplasmic reticulum lumen,cell surface	sp	1	1	uniprot_mouse_proteome	>sp|P22724|WNT4_MOUSE Protein Wnt-4 OS=Mus musculus GN=Wnt4 PE=1 SV=1	2	2
TRUE	Old_Decellularized / Young_Decellularized	Old_Decellularized	Young_Decellularized	10	P39098;P39098-2	75183.1	67349	-0.158752	0.158752	-10.42	0.8958	0	0.575908	0.247291	9	0.152471	P39098;P39098-2	MA1A2_MOUSE	Mannosyl-oligosaccharide 1,2-alpha-mannosidase IB;Isoform 2 of Mannosyl-oligosaccharide 1,2-alpha-mannosidase IB	Man1a2	P39098;P39098-2	Mus musculus	protein glycosylation,N-glycan processing,respiratory gaseous exchange,glycoprotein metabolic process,lung alveolus development;	mannosyl-oligosaccharide 1,2-alpha-mannosidase activity,calcium ion binding;	Golgi membrane,endoplasmic reticulum,Golgi apparatus,membrane,integral component of membrane,extracellular exosome;	sp	1;	1;	uniprot_mouse_proteome	>sp|P39098|MA1A2_MOUSE Mannosyl-oligosaccharide 1,2-alpha-mannosidase IB OS=Mus musculus GN=Man1a2 PE=1 SV=1;>sp|P39098-2|MA1A2_MOUSE Isoform 2 of Mannosyl-oligosaccharide 1,2-alpha-mannosidase IB OS=Mus musculus GN=Man1a2	2	2
TRUE	Old_Decellularized / Young_Decellularized	Old_Decellularized	Young_Decellularized	20	P51807	116490	92548.5	-0.331921	0.331921	-20.5522	0.794478	0	0.00864875	0.0103206	19	0.118395	P51807	DYLT1_MOUSE	Dynein light chain Tctex-type 1	Dynlt1	P51807	Mus musculus	establishment of mitotic spindle orientation,transport,regulation of G-protein coupled receptor protein signaling pathway,positive regulation of neuron projection development,negative regulation of neurogenesis,cell division,negative regulation of ERK1 and ERK2 cascade	motor activity,protein binding,GTP-dependent protein binding,G-protein beta-subunit binding,identical protein binding	photoreceptor inner segment,Golgi apparatus,spindle,cytoplasmic dynein complex,cytoplasmic microtubule,growth cone,cell body,secretory vesicle	sp	1	1	uniprot_mouse_proteome	>sp|P51807|DYLT1_MOUSE Dynein light chain Tctex-type 1 OS=Mus musculus GN=Dynlt1 PE=1 SV=1	2	4
TRUE	Old_Decellularized / Young_Decellularized	Old_Decellularized	Young_Decellularized	10	P58389	262542	240601	-0.125904	0.125904	-8.35701	0.91643	0	0.109924	0.0712828	9	0.0702023	P58389	PTPA_MOUSE	Serine/threonine-protein phosphatase 2A activator	Ppp2r4	P58389	Mus musculus	protein peptidyl-prolyl isomerization,mitotic spindle organization in nucleus,negative regulation of phosphoprotein phosphatase activity,positive regulation of phosphoprotein phosphatase activity,positive regulation of protein dephosphorylation,negative regulation of protein dephosphorylation,positive regulation of apoptotic process,regulation of phosphoprotein phosphatase activity	peptidyl-prolyl cis-trans isomerase activity,receptor binding,ATP binding,protein tyrosine phosphatase activator activity,protein phosphatase regulator activity,protein homodimerization activity,protein phosphatase 2A binding,ATPase activity	protein phosphatase type 2A complex,nucleus,nucleoplasm,cytoplasm,calcium channel complex,extracellular exosome	sp	1	1	uniprot_mouse_proteome	>sp|P58389|PTPA_MOUSE Serine/threonine-protein phosphatase 2A activator OS=Mus musculus GN=Ppp2r4 PE=1 SV=1	2	2
TRUE	Old_Decellularized / Young_Decellularized	Old_Decellularized	Young_Decellularized	15	P63028	141097	116964	-0.270616	0.270616	-17.1034	0.828966	0	0.0291364	0.0259231	14	0.110591	P63028	TCTP_MOUSE	Translationally-controlled tumor protein	Tpt1	P63028	Mus musculus	stem cell population maintenance,cell differentiation,negative regulation of intrinsic apoptotic signaling pathway in response to DNA damage,negative regulation of ectoderm development	RNA binding,calcium ion binding,protein binding,microtubule binding,transcription factor binding	extracellular space,nucleus,nucleoplasm,cytoplasm,multivesicular body,cytosol,extracellular exosome,tubulin complex	sp	1	1	uniprot_mouse_proteome	>sp|P63028|TCTP_MOUSE Translationally-controlled tumor protein OS=Mus musculus GN=Tpt1 PE=1 SV=1	2	3
TRUE	Old_Decellularized / Young_Decellularized	Old_Decellularized	Young_Decellularized	15	P63321	653640	636223	-0.0389623	0.0389623	-2.66452	0.973355	0	0.705148	0.286153	14	0.097238	P63321	RALA_MOUSE	Ras-related protein Ral-A	Rala	P63321	Mus musculus	neural tube closure,exocytosis,cell cycle,Ras protein signal transduction,regulation of exocytosis,actin cytoskeleton reorganization,cell division,positive regulation of filopodium assembly,membrane raft localization,membrane organization	GTPase activity,protein binding,GTP binding,myosin binding,GDP binding,ubiquitin protein ligase binding,Edg-2 lysophosphatidic acid receptor binding,ATPase binding	plasma membrane,focal adhesion,cell surface,midbody,cytoplasmic vesicle membrane,cleavage furrow,myelin sheath,extracellular exosome,endocytic vesicle	sp	1	1	uniprot_mouse_proteome	>sp|P63321|RALA_MOUSE Ras-related protein Ral-A OS=Mus musculus GN=Rala PE=1 SV=1	2	3
TRUE	Old_Decellularized / Young_Decellularized	Old_Decellularized	Young_Decellularized	10	P70677	55068.7	38859.5	-0.502966	0.502966	-29.4346	0.705654	0	0.0113985	0.0127385	9	0.163814	P70677	CASP3_MOUSE	Caspase-3	Casp3	P70677	Mus musculus	response to hypoxia,B cell homeostasis,proteolysis,apoptotic process,cellular response to DNA damage stimulus,heart development,sensory perception of sound,learning or memory,intrinsic apoptotic signaling pathway in response to osmotic stress,response to UV,response to wounding,response to glucose,response to organic substance,response to X-ray,protein processing,hippocampus development,neuron di…	protease binding,aspartic-type endopeptidase activity,cysteine-type endopeptidase activity,serine-type endopeptidase activity,cyclin-dependent protein serine/threonine kinase inhibitor activity,death receptor binding,protein binding,peptidase activity,cysteine-type peptidase activity,phospholipase A2 activator activity,protein complex binding,cysteine-type endopeptidase activity involved in apopt…	nucleus,cytoplasm,cytosol,death-inducing signaling complex,membrane raft	sp	1	1	uniprot_mouse_proteome	>sp|P70677|CASP3_MOUSE Caspase-3 OS=Mus musculus GN=Casp3 PE=1 SV=1	2	2
TRUE	Old_Decellularized / Young_Decellularized	Old_Decellularized	Young_Decellularized	10	Q03141;Q03141-2;Q03141-3	66421.7	57646.2	-0.204429	0.204429	-13.2118	0.867882	0	0.14464	0.0882948	9	0.119776	Q03141;Q03141-2;Q03141-3	MARK3_MOUSE	MAP/microtubule affinity-regulating kinase 3;Isoform 2 of MAP/microtubule affinity-regulating kinase 3;Isoform 3 of MAP/microtubule affinity-regulating kinase 3	Mark3	Q03141;Q03141-2;Q03141-3	Mus musculus	microtubule cytoskeleton organization,protein phosphorylation,establishment of cell polarity,negative regulation of hippo signaling;;	protein serine/threonine kinase activity,protein binding,ATP binding;;	plasma membrane,extracellular exosome;;	sp	1;;	2;;	uniprot_mouse_proteome	>sp|Q03141|MARK3_MOUSE MAP/microtubule affinity-regulating kinase 3 OS=Mus musculus GN=Mark3 PE=1 SV=2;>sp|Q03141-2|MARK3_MOUSE Isoform 2 of MAP/microtubule affinity-regulating kinase 3 OS=Mus musculus GN=Mark3;>sp|Q03141-3|MARK3_MOUSE Isoform 3 of MAP/microtubule affinity-regulating kinase 3 OS=Mus musculus GN=Mark3	2	2
TRUE	Old_Decellularized / Young_Decellularized	Old_Decellularized	Young_Decellularized	10	Q3UGP8	371513	289855	-0.358083	0.358083	-21.9799	0.780201	0	0.0995151	0.0664055	9	0.128638	Q3UGP8	AG10B_MOUSE	Putative Dol-P-Glc:Glc(2)Man(9)GlcNAc(2)-PP-Dol alpha-1,2-glucosyltransferase	Alg10b	Q3UGP8	Mus musculus	dolichol-linked oligosaccharide biosynthetic process,sensory perception of sound,auditory receptor cell development,regulation of molecular function	dolichyl-phosphate-glucose-glycolipid alpha-glucosyltransferase activity,potassium channel regulator activity	endoplasmic reticulum membrane,plasma membrane,integral component of membrane	sp	1	1	uniprot_mouse_proteome	>sp|Q3UGP8|AG10B_MOUSE Putative Dol-P-Glc:Glc(2)Man(9)GlcNAc(2)-PP-Dol alpha-1,2-glucosyltransferase OS=Mus musculus GN=Alg10b PE=1 SV=1	2	2
TRUE	Old_Decellularized / Young_Decellularized	Old_Decellularized	Young_Decellularized	10	Q5SSI6	54121	43642.1	-0.310467	0.310467	-19.3619	0.806381	0	0.336411	0.166744	9	0.197939	Q5SSI6	UTP18_MOUSE	U3 small nucleolar RNA-associated protein 18 homolog	Utp18	Q5SSI6	Mus musculus	maturation of SSU-rRNA from tricistronic rRNA transcript (SSU-rRNA, 5.8S rRNA, LSU-rRNA)	RNA binding	nucleus,nucleolus,nuclear membrane,small-subunit processome,Pwp2p-containing subcomplex of 90S preribosome	sp	1	1	uniprot_mouse_proteome	>sp|Q5SSI6|UTP18_MOUSE U3 small nucleolar RNA-associated protein 18 homolog OS=Mus musculus GN=Utp18 PE=1 SV=1	2	2
TRUE	Old_Decellularized / Young_Decellularized	Old_Decellularized	Young_Decellularized	10	Q5SSW2	33662.4	24452	-0.461189	0.461189	-27.3613	0.726387	0	0.0342969	0.0293034	9	0.269693	Q5SSW2	PSME4_MOUSE	Proteasome activator complex subunit 4	Psme4	Q5SSW2	Mus musculus	DNA repair,cellular response to DNA damage stimulus,multicellular organism development,proteasomal ubiquitin-independent protein catabolic process,positive regulation of peptidase activity,spermatogenesis, exchange of chromosomal proteins	peptidase activator activity,lysine-acetylated histone binding,proteasome binding	nucleus,nucleoplasm,cytosol,proteasome core complex,nuclear speck,spermatoproteasome complex	sp	1	1	uniprot_mouse_proteome	>sp|Q5SSW2|PSME4_MOUSE Proteasome activator complex subunit 4 OS=Mus musculus GN=Psme4 PE=1 SV=1	2	2
TRUE	Old_Decellularized / Young_Decellularized	Old_Decellularized	Young_Decellularized	10	Q61133	27685.7	27465	-0.0115477	0.0115477	-0.79723	0.992028	0	0.512384	0.227478	9	0.254394	Q61133	GSTT2_MOUSE	Glutathione S-transferase theta-2	Gstt2	Q61133	Mus musculus	glutathione metabolic process,cellular response to leukemia inhibitory factor	glutathione transferase activity	nucleus,nucleoplasm,cytosol,extracellular exosome	sp	1	4	uniprot_mouse_proteome	>sp|Q61133|GSTT2_MOUSE Glutathione S-transferase theta-2 OS=Mus musculus GN=Gstt2 PE=1 SV=4	2	2
TRUE	Old_Decellularized / Young_Decellularized	Old_Decellularized	Young_Decellularized	10	Q62348	162519	144670	-0.167839	0.167839	-10.9825	0.890175	0	0.298252	0.152222	9	0.0986948	Q62348	TSN_MOUSE	Translin	Tsn	Q62348	Mus musculus	RNA metabolic process,nucleic acid phosphodiester bond hydrolysis	single-stranded DNA binding,RNA binding,mRNA binding,endonuclease activity,protein binding,protein complex binding,identical protein binding,sequence-specific DNA binding	nucleus,cytoplasm	sp	1	1	uniprot_mouse_proteome	>sp|Q62348|TSN_MOUSE Translin OS=Mus musculus GN=Tsn PE=1 SV=1	2	2
TRUE	Old_Decellularized / Young_Decellularized	Old_Decellularized	Young_Decellularized	10	Q6P1H6;Q6P1H6-2;Q6P1H6-3	18666.8	31832.9	0.770042	0.770042	70.5319	1.70532	0	0.0179873	0.0180075	9	0.268076	Q6P1H6;Q6P1H6-2;Q6P1H6-3	ANKL2_MOUSE	Ankyrin repeat and LEM domain-containing protein 2;Isoform 2 of Ankyrin repeat and LEM domain-containing protein 2;Isoform 3 of Ankyrin repeat and LEM domain-containing protein 2	Ankle2	Q6P1H6;Q6P1H6-2;Q6P1H6-3	Mus musculus	mitotic nuclear envelope reassembly,central nervous system development,positive regulation of protein dephosphorylation,negative regulation of phosphorylation,negative regulation of apoptotic process,cell division;;	protein phosphatase 2A binding;;	endoplasmic reticulum,membrane,integral component of endoplasmic reticulum membrane;;	sp	1;;	2;;	uniprot_mouse_proteome	>sp|Q6P1H6|ANKL2_MOUSE Ankyrin repeat and LEM domain-containing protein 2 OS=Mus musculus GN=Ankle2 PE=1 SV=2;>sp|Q6P1H6-2|ANKL2_MOUSE Isoform 2 of Ankyrin repeat and LEM domain-containing protein 2 OS=Mus musculus GN=Ankle2;>sp|Q6P1H6-3|ANKL2_MOUSE Isoform 3 of Ankyrin repeat and LEM domain-containing protein 2 OS=Mus musculus GN=Ankle2	2	2
TRUE	Old_Decellularized / Young_Decellularized	Old_Decellularized	Young_Decellularized	10	Q6ZPE2;Q6ZPE2-2	24934.1	27796.4	0.156781	0.156781	11.4797	1.1148	0	0.537069	0.23551	9	0.191353	Q6ZPE2;Q6ZPE2-2	MTMR5_MOUSE	Myotubularin-related protein 5;Isoform 2 of Myotubularin-related protein 5	Sbf1	Q6ZPE2;Q6ZPE2-2	Mus musculus	regulation of cell growth,spermatogenesis,negative regulation of catalytic activity,positive regulation of GTPase activity;	pseudophosphatase activity,Rab guanyl-nucleotide exchange factor activity;	cellular_component,nucleus;	sp	1;	2;	uniprot_mouse_proteome	>sp|Q6ZPE2|MTMR5_MOUSE Myotubularin-related protein 5 OS=Mus musculus GN=Sbf1 PE=1 SV=2;>sp|Q6ZPE2-2|MTMR5_MOUSE Isoform 2 of Myotubularin-related protein 5 OS=Mus musculus GN=Sbf1	2	2
TRUE	Old_Decellularized / Young_Decellularized	Old_Decellularized	Young_Decellularized	10	Q78JW9	78264.3	56352.4	-0.473877	0.473877	-27.9973	0.720027	0	0.0106963	0.0121416	9	0.143266	Q78JW9	UBFD1_MOUSE	Ubiquitin domain-containing protein UBFD1	Ubfd1	Q78JW9	Mus musculus		RNA binding,cadherin binding		sp	1	2	uniprot_mouse_proteome	>sp|Q78JW9|UBFD1_MOUSE Ubiquitin domain-containing protein UBFD1 OS=Mus musculus GN=Ubfd1 PE=1 SV=2	2	2
TRUE	Old_Decellularized / Young_Decellularized	Old_Decellularized	Young_Decellularized	10	Q8BHB4	123153	71763.9	-0.779126	0.779126	-41.728	0.58272	0	0.00398643	0.0053781	9	0.217387	Q8BHB4	WDR3_MOUSE	WD repeat-containing protein 3	Wdr3	Q8BHB4	Mus musculus	maturation of SSU-rRNA	RNA binding,snoRNA binding	nucleus,nucleolus,nuclear membrane,small-subunit processome,Pwp2p-containing subcomplex of 90S preribosome	sp	1	1	uniprot_mouse_proteome	>sp|Q8BHB4|WDR3_MOUSE WD repeat-containing protein 3 OS=Mus musculus GN=Wdr3 PE=1 SV=1	2	2
TRUE	Old_Decellularized / Young_Decellularized	Old_Decellularized	Young_Decellularized	10	Q8BPE4	157625	151479	-0.0573756	0.0573756	-3.89893	0.961011	0	0.687134	0.281244	9	0.0862599	Q8BPE4	TM177_MOUSE	Transmembrane protein 177	Tmem177	Q8BPE4	Mus musculus	biological_process	molecular_function	cellular_component,integral component of membrane	sp	1	1	uniprot_mouse_proteome	>sp|Q8BPE4|TM177_MOUSE Transmembrane protein 177 OS=Mus musculus GN=Tmem177 PE=1 SV=1	2	2
TRUE	Old_Decellularized / Young_Decellularized	Old_Decellularized	Young_Decellularized	10	Q8CHW4	134136	112862	-0.249145	0.249145	-15.8605	0.841395	0	0.0555326	0.0426025	9	0.0788779	Q8CHW4	EI2BE_MOUSE	Translation initiation factor eIF-2B subunit epsilon	Eif2b5	Q8CHW4	Mus musculus	ovarian follicle development,translational initiation,aging,response to heat,response to glucose,response to lithium ion,astrocyte development,oligodendrocyte development,hippocampus development,response to endoplasmic reticulum stress,cellular response to drug,myelination,positive regulation of apoptotic process,response to peptide hormone,positive regulation of GTPase activity,positive regulati…	guanyl-nucleotide exchange factor activity,translation initiation factor binding,translation initiation factor activity	nucleus,cytoplasm,cytosol,eukaryotic translation initiation factor 2B complex	sp	1	1	uniprot_mouse_proteome	>sp|Q8CHW4|EI2BE_MOUSE Translation initiation factor eIF-2B subunit epsilon OS=Mus musculus GN=Eif2b5 PE=1 SV=1	2	2
TRUE	Old_Decellularized / Young_Decellularized	Old_Decellularized	Young_Decellularized	10	Q8CJ26	71756.1	87706.8	0.289587	0.289587	22.2291	1.22229	0	0.00196567	0.00304018	9	0.0759315	Q8CJ26	NRADD_MOUSE	Death domain-containing membrane protein NRADD	Nradd	Q8CJ26	Mus musculus	in utero embryonic development,inflammatory response,immune response,multicellular organism development,brain development,positive regulation of cell death,response to lipopolysaccharide,tumor necrosis factor-mediated signaling pathway,regulation of cell proliferation,regulation of apoptotic process,apoptotic signaling pathway	tumor necrosis factor-activated receptor activity,neurotrophin p75 receptor binding,protein binding	nucleus,nuclear envelope lumen,integral component of plasma membrane,membrane,lamellipodium,neuron projection membrane,cell body membrane	sp	1	1	uniprot_mouse_proteome	>sp|Q8CJ26|NRADD_MOUSE Death domain-containing membrane protein NRADD OS=Mus musculus GN=Nradd PE=1 SV=1	2	2
TRUE	Old_Decellularized / Young_Decellularized	Old_Decellularized	Young_Decellularized	10	Q8K363	125225	78854.9	-0.667249	0.667249	-37.0294	0.629706	0	0.00125744	0.00208501	9	0.139334	Q8K363	DDX18_MOUSE	ATP-dependent RNA helicase DDX18	Ddx18	Q8K363	Mus musculus	RNA secondary structure unwinding,cellular response to estradiol stimulus	RNA binding,ATP-dependent RNA helicase activity,ATP binding	chromosome,nucleolus,cytoplasm,membrane	sp	1	1	uniprot_mouse_proteome	>sp|Q8K363|DDX18_MOUSE ATP-dependent RNA helicase DDX18 OS=Mus musculus GN=Ddx18 PE=1 SV=1	2	2
TRUE	Old_Decellularized / Young_Decellularized	Old_Decellularized	Young_Decellularized	10	Q8R1F1	57618.1	69901.1	0.278792	0.278792	21.3178	1.21318	0	0.0113032	0.0126716	9	0.127026	Q8R1F1	NIBL1_MOUSE	Niban-like protein 1	Fam129b	Q8R1F1	Mus musculus	negative regulation of cell proliferation,gonadotropin secretion,RNA folding,negative regulation of apoptotic process,negative regulation of transcription, DNA-templated,positive regulation of transcription, DNA-templated,negative regulation of DNA biosynthetic process	transcription coactivator activity,cadherin binding	nucleoplasm,cytoplasm,cytosol,plasma membrane,adherens junction,extracellular exosome,nucleus	sp	1	2	uniprot_mouse_proteome	>sp|Q8R1F1|NIBL1_MOUSE Niban-like protein 1 OS=Mus musculus GN=Fam129b PE=1 SV=2	2	2
TRUE	Old_Decellularized / Young_Decellularized	Old_Decellularized	Young_Decellularized	10	Q99N57;Q99N57-2	108199	102244	-0.0816708	0.0816708	-5.50373	0.944963	0	0.209448	0.11608	9	0.0629423	Q99N57;Q99N57-2	RAF1_MOUSE	RAF proto-oncogene serine/threonine-protein kinase;Isoform 2 of RAF proto-oncogene serine/threonine-protein kinase	Raf1	Q99N57;Q99N57-2	Mus musculus	MAPK cascade,activation of MAPKK activity,response to hypoxia,cellular glucose homeostasis,positive regulation of protein phosphorylation,heart development,negative regulation of cell proliferation,cell differentiation,thyroid gland development,negative regulation of protein complex assembly,positive regulation of peptidyl-serine phosphorylation,somatic stem cell population maintenance,intracellu…	protein kinase activity,protein serine/threonine kinase activity,MAP kinase kinase kinase activity,protein binding,ATP binding,Ras GTPase binding,enzyme binding,mitogen-activated protein kinase kinase binding,identical protein binding,metal ion binding,protein heterodimerization activity;	cytoplasm,mitochondrion,Golgi apparatus,cytosol,plasma membrane,nuclear speck,pseudopodium;	sp	1;	2;	uniprot_mouse_proteome	>sp|Q99N57|RAF1_MOUSE RAF proto-oncogene serine/threonine-protein kinase OS=Mus musculus GN=Raf1 PE=1 SV=2;>sp|Q99N57-2|RAF1_MOUSE Isoform 2 of RAF proto-oncogene serine/threonine-protein kinase OS=Mus musculus GN=Raf1	2	2
TRUE	Old_Decellularized / Young_Decellularized	Old_Decellularized	Young_Decellularized	10	Q9CQE1	219502	178170	-0.300983	0.300983	-18.8301	0.811699	0	7.97864e-05	0.000198561	9	0.0418938	Q9CQE1	NPS3B_MOUSE	Protein NipSnap homolog 3B	Nipsnap3b	Q9CQE1	Mus musculus	biological_process	molecular_function	nucleus,mitochondrion,cytosol	sp	1	1	uniprot_mouse_proteome	>sp|Q9CQE1|NPS3B_MOUSE Protein NipSnap homolog 3B OS=Mus musculus GN=Nipsnap3b PE=1 SV=1	2	2
TRUE	Old_Decellularized / Young_Decellularized	Old_Decellularized	Young_Decellularized	15	Q9CR51	49986.1	97970.4	0.970819	0.970819	95.9953	1.95995	0	0.00111204	0.00188783	14	0.348783	Q9CR51	VATG1_MOUSE	V-type proton ATPase subunit G 1	Atp6v1g1	Q9CR51	Mus musculus	cellular iron ion homeostasis,cellular response to increased oxygen levels,hydrogen ion transmembrane transport	protein binding,hydrogen-exporting ATPase activity, phosphorylative mechanism,ATPase activity,ATPase binding	intracellular,lysosomal membrane,cytosol,plasma membrane,vacuolar proton-transporting V-type ATPase complex,extracellular exosome,synaptic vesicle	sp	1	3	uniprot_mouse_proteome	>sp|Q9CR51|VATG1_MOUSE V-type proton ATPase subunit G 1 OS=Mus musculus GN=Atp6v1g1 PE=1 SV=3	2	3
TRUE	Old_Decellularized / Young_Decellularized	Old_Decellularized	Young_Decellularized	10	Q9CR86	617159	388567	-0.667478	0.667478	-37.0393	0.629607	0	0.00115651	0.00195633	9	0.12913	Q9CR86	CHSP1_MOUSE	Calcium-regulated heat stable protein 1	Carhsp1	Q9CR86	Mus musculus	regulation of transcription, DNA-templated,regulation of mRNA stability	DNA binding,mRNA 3'-UTR binding,protein binding	cytoplasmic mRNA processing body,cytosol,P granule,extracellular exosome,cytoplasmic exosome (RNase complex)	sp	1	1	uniprot_mouse_proteome	>sp|Q9CR86|CHSP1_MOUSE Calcium-regulated heat stable protein 1 OS=Mus musculus GN=Carhsp1 PE=1 SV=1	2	2
TRUE	Old_Decellularized / Young_Decellularized	Old_Decellularized	Young_Decellularized	10	Q9D6Y7;Q9D6Y7-2;Q9D6Y7-3	83721	78113.9	-0.100012	0.100012	-6.69746	0.933025	0	0.95809	0.354867	9	0.164428	Q9D6Y7;Q9D6Y7-2;Q9D6Y7-3	MSRA_MOUSE	Mitochondrial peptide methionine sulfoxide reductase;Isoform 2 of Mitochondrial peptide methionine sulfoxide reductase;Isoform 3 of Mitochondrial peptide methionine sulfoxide reductase	Msra	Q9D6Y7;Q9D6Y7-2;Q9D6Y7-3	Mus musculus	oxidation-reduction process;;	peptide-methionine (S)-S-oxide reductase activity;;	nucleoplasm,cytoplasm,mitochondrion,cytosol,actin cytoskeleton,membrane,extracellular exosome;;	sp	1;;	1;;	uniprot_mouse_proteome	>sp|Q9D6Y7|MSRA_MOUSE Mitochondrial peptide methionine sulfoxide reductase OS=Mus musculus GN=Msra PE=1 SV=1;>sp|Q9D6Y7-2|MSRA_MOUSE Isoform 2 of Mitochondrial peptide methionine sulfoxide reductase OS=Mus musculus GN=Msra;>sp|Q9D6Y7-3|MSRA_MOUSE Isoform 3 of Mitochondrial peptide methionine sulfoxide reductase OS=Mus musculus GN=Msra	2	2
TRUE	Old_Decellularized / Young_Decellularized	Old_Decellularized	Young_Decellularized	10	Q9D898	92202.5	144662	0.649805	0.649805	56.8956	1.56896	0	0.0199953	0.0195699	9	0.249883	Q9D898	ARP5L_MOUSE	Actin-related protein 2/3 complex subunit 5-like protein	Arpc5l	Q9D898	Mus musculus	cell migration,Arp2/3 complex-mediated actin nucleation	actin filament binding	cytoplasm,Arp2/3 protein complex,focal adhesion,extracellular exosome	sp	1	1	uniprot_mouse_proteome	>sp|Q9D898|ARP5L_MOUSE Actin-related protein 2/3 complex subunit 5-like protein OS=Mus musculus GN=Arpc5l PE=1 SV=1	2	2
TRUE	Old_Decellularized / Young_Decellularized	Old_Decellularized	Young_Decellularized	10	Q9JIG8	300276	211958	-0.502511	0.502511	-29.4123	0.705877	0	0.00128013	0.00212017	9	0.101246	Q9JIG8	PRAF2_MOUSE	PRA1 family protein 2	Praf2	Q9JIG8	Mus musculus	biological_process,protein transport	molecular_function	cellular_component,endosome membrane,integral component of membrane	sp	1	1	uniprot_mouse_proteome	>sp|Q9JIG8|PRAF2_MOUSE PRA1 family protein 2 OS=Mus musculus GN=Praf2 PE=1 SV=1	2	2
TRUE	Old_Decellularized / Young_Decellularized	Old_Decellularized	Young_Decellularized	10	A0A0N4SWF7;Q923D5	49366.9	52818.4	0.0974964	0.0974964	6.99151	1.06992	0	0.363876	0.176853	9	0.176486	A0A0N4SWF7;Q923D5	A0A0N4SWF7_MOUSE;WBP11_MOUSE	WW domain-binding protein 11	Wbp11	A0A0N4SWF7;Q923D5	Mus musculus	;rRNA processing,RNA splicing,mRNA cis splicing, via spliceosome,regulation of catalytic activity,regulation of mitophagy,positive regulation of protein targeting to mitochondrion	;RNA binding,protein phosphatase regulator activity,WW domain binding	;nucleus,nucleoplasm,spliceosomal complex,cytoplasm,cytosol,nuclear speck,intracellular membrane-bounded organelle,nucleolus	tr;sp	1	1;2	uniprot_mouse_proteome	>tr|A0A0N4SWF7|A0A0N4SWF7_MOUSE WW domain-binding protein 11 OS=Mus musculus GN=Wbp11 PE=1 SV=1;>sp|Q923D5|WBP11_MOUSE WW domain-binding protein 11 OS=Mus musculus GN=Wbp11 PE=1 SV=2	2	2
TRUE	Old_Decellularized / Young_Decellularized	Old_Decellularized	Young_Decellularized	10	A0A0R4J2B6;Q8BX09	21621.5	17442.9	-0.309827	0.309827	-19.3261	0.806739	0	0.529053	0.232777	9	0.34612	A0A0R4J2B6;Q8BX09	A0A0R4J2B6_MOUSE;RBBP5_MOUSE	Retinoblastoma-binding protein 5	Rbbp5	A0A0R4J2B6;Q8BX09	Mus musculus	;transcription, DNA-templated,regulation of transcription, DNA-templated,cellular response to DNA damage stimulus,response to estrogen,histone H3-K4 methylation	;protein binding,methylated histone binding,transcription regulatory region DNA binding,histone methyltransferase activity (H3-K4 specific)	;nucleus,nucleoplasm,nucleolus,histone methyltransferase complex,MLL3/4 complex,Set1C/COMPASS complex,MLL1 complex	tr;sp	1	1;2	uniprot_mouse_proteome	>tr|A0A0R4J2B6|A0A0R4J2B6_MOUSE Retinoblastoma-binding protein 5 OS=Mus musculus GN=Rbbp5 PE=1 SV=1;>sp|Q8BX09|RBBP5_MOUSE Retinoblastoma-binding protein 5 OS=Mus musculus GN=Rbbp5 PE=1 SV=2	2	2
TRUE	Old_Decellularized / Young_Decellularized	Old_Decellularized	Young_Decellularized	10	A0A0X1KG62;Q8C4Y3	73811.7	42053.3	-0.811632	0.811632	-43.0263	0.569737	0	0.0206932	0.0200875	9	0.23589	A0A0X1KG62;Q8C4Y3	A0A0X1KG62_MOUSE;NELFB_MOUSE	Negative elongation factor B	Nelfb	A0A0X1KG62;Q8C4Y3	Mus musculus	;transcription, DNA-templated,negative regulation of transcription elongation from RNA polymerase II promoter	;RNA binding	;nucleoplasm,cytoplasm,NELF complex	tr;sp	1	1;2	uniprot_mouse_proteome	>tr|A0A0X1KG62|A0A0X1KG62_MOUSE Negative elongation factor B OS=Mus musculus GN=Nelfb PE=1 SV=1;>sp|Q8C4Y3|NELFB_MOUSE Negative elongation factor B OS=Mus musculus GN=Nelfb PE=1 SV=2	2	2
TRUE	Old_Decellularized / Young_Decellularized	Old_Decellularized	Young_Decellularized	10	A2AKH7;Q8JZX5;Q9D1G5	58637	52322.5	-0.16438	0.16438	-10.7688	0.892312	0	0.330297	0.164457	9	0.174514	A2AKH7;Q8JZX5;Q9D1G5	A2AKH7_MOUSE;Q8JZX5_MOUSE;LRC57_MOUSE	Leucine-rich repeat-containing protein 57 (Fragment);Leucine rich repeat containing 57;Leucine-rich repeat-containing protein 57	Lrrc57	A2AKH7;Q8JZX5;Q9D1G5	Mus musculus	;;biological_process	;;molecular_function	;;membrane,extracellular exosome	tr;tr;sp	1	8;1;1	uniprot_mouse_proteome	>tr|A2AKH7|A2AKH7_MOUSE Leucine-rich repeat-containing protein 57 (Fragment) OS=Mus musculus GN=Lrrc57 PE=1 SV=8;>tr|Q8JZX5|Q8JZX5_MOUSE Leucine rich repeat containing 57 OS=Mus musculus GN=Lrrc57 PE=1 SV=1;>sp|Q9D1G5|LRC57_MOUSE Leucine-rich repeat-containing protein 57 OS=Mus musculus GN=Lrrc57 PE=1 SV=1	2	2
TRUE	Old_Decellularized / Young_Decellularized	Old_Decellularized	Young_Decellularized	10	B7ZNL8;F7CG42;Q91VU7	118908	74556.3	-0.673441	0.673441	-37.2991	0.627009	0	0.00254449	0.00374362	9	0.142328	B7ZNL8;F7CG42;Q91VU7	B7ZNL8_MOUSE;F7CG42_MOUSE;Q91VU7_MOUSE	Protein Pus7;Protein Pus7 (Fragment);Protein Pus7	Pus7	B7ZNL8;F7CG42;Q91VU7	Mus musculus	pseudouridine synthesis;;	RNA binding,pseudouridine synthase activity,enzyme binding;;	nucleus;;	tr	1	1;1;2	uniprot_mouse_proteome	>tr|B7ZNL8|B7ZNL8_MOUSE Protein Pus7 OS=Mus musculus GN=Pus7 PE=1 SV=1;>tr|F7CG42|F7CG42_MOUSE Protein Pus7 (Fragment) OS=Mus musculus GN=Pus7 PE=1 SV=1;>tr|Q91VU7|Q91VU7_MOUSE Protein Pus7 OS=Mus musculus GN=Pus7 PE=1 SV=2	2	2
TRUE	Old_Decellularized / Young_Decellularized	Old_Decellularized	Young_Decellularized	10	B9EJ80	32268.6	26593.6	-0.279049	0.279049	-17.5866	0.824134	0	0.0550451	0.0423378	9	0.161191	B9EJ80	B9EJ80_MOUSE	PDZ domain containing 8	Pdzd8	B9EJ80	Mus musculus	cytoskeleton organization,regulation of cell morphogenesis,intracellular signal transduction	molecular_function,metal ion binding	intracellular,membrane	tr	1	1	uniprot_mouse_proteome	>tr|B9EJ80|B9EJ80_MOUSE PDZ domain containing 8 OS=Mus musculus GN=Pdzd8 PE=1 SV=1	2	2
TRUE	Old_Decellularized / Young_Decellularized	Old_Decellularized	Young_Decellularized	10	F7BTP8;Q9QYI3	189256	215849	0.189681	0.189681	14.0511	1.14051	0	0.14934	0.0905435	9	0.175396	F7BTP8;Q9QYI3	F7BTP8_MOUSE;DNJC7_MOUSE	DnaJ homolog subfamily C member 7 (Fragment);DnaJ homolog subfamily C member 7	Dnajc7	F7BTP8;Q9QYI3	Mus musculus	;chaperone cofactor-dependent protein refolding	;heat shock protein binding	;nucleoplasm,cytoplasm,cytosol,cytoskeleton,membrane,extracellular exosome	tr;sp	1	1;2	uniprot_mouse_proteome	>tr|F7BTP8|F7BTP8_MOUSE DnaJ homolog subfamily C member 7 (Fragment) OS=Mus musculus GN=Dnajc7 PE=1 SV=1;>sp|Q9QYI3|DNJC7_MOUSE DnaJ homolog subfamily C member 7 OS=Mus musculus GN=Dnajc7 PE=1 SV=2	2	2
TRUE	Old_Decellularized / Young_Decellularized	Old_Decellularized	Young_Decellularized	10	H3BJ51;H3BKK1;Q64FW2	53370.7	85476	0.679472	0.679472	60.1553	1.60155	0	0.0456939	0.0364936	9	0.36499	H3BJ51;H3BKK1;Q64FW2	H3BJ51_MOUSE;H3BKK1_MOUSE;RETST_MOUSE	All-trans-retinol 13,14-reductase;All-trans-retinol 13,14-reductase;All-trans-retinol 13,14-reductase	Retsat	H3BJ51;H3BKK1;Q64FW2	Mus musculus	;;retinoid metabolic process,retinol metabolic process,oxidation-reduction process	;;oxidoreductase activity,all-trans-retinol 13,14-reductase activity	;;nuclear outer membrane,endoplasmic reticulum membrane,membrane,nuclear membrane	tr;tr;sp	1	1;1;3	uniprot_mouse_proteome	>tr|H3BJ51|H3BJ51_MOUSE All-trans-retinol 13,14-reductase OS=Mus musculus GN=Retsat PE=1 SV=1;>tr|H3BKK1|H3BKK1_MOUSE All-trans-retinol 13,14-reductase OS=Mus musculus GN=Retsat PE=1 SV=1;>sp|Q64FW2|RETST_MOUSE All-trans-retinol 13,14-reductase OS=Mus musculus GN=Retsat PE=1 SV=3	2	2
TRUE	Old_Decellularized / Young_Decellularized	Old_Decellularized	Young_Decellularized	10	I6L974;Q8BYH7	139553	150563	0.109551	0.109551	7.88924	1.07889	0	0.945639	0.351808	9	0.184658	I6L974;Q8BYH7	I6L974_MOUSE;TBC17_MOUSE	TBC1 domain family member 17	Tbc1d17	I6L974;Q8BYH7	Mus musculus	;intracellular protein transport,autophagy,regulation of vesicle fusion,retrograde transport, endosome to Golgi,activation of GTPase activity	;GTPase activator activity,Rab GTPase binding	;intracellular,autophagosome,cytosol,endomembrane system,cytoplasmic vesicle	tr;sp	1	1;2	uniprot_mouse_proteome	>tr|I6L974|I6L974_MOUSE TBC1 domain family member 17 OS=Mus musculus GN=Tbc1d17 PE=1 SV=1;>sp|Q8BYH7|TBC17_MOUSE TBC1 domain family member 17 OS=Mus musculus GN=Tbc1d17 PE=1 SV=2	2	2
TRUE	Old_Decellularized / Young_Decellularized	Old_Decellularized	Young_Decellularized	10	P39688	40742.8	44912.4	0.140567	0.140567	10.2338	1.10234	0	0.395149	0.18784	9	0.18701	P39688	FYN_MOUSE	Tyrosine-protein kinase Fyn	Fyn	P39688	Mus musculus	neuron migration,adaptive immune response,protein phosphorylation,cell surface receptor signaling pathway,transmembrane receptor protein tyrosine kinase signaling pathway,axon guidance,regulation of cell shape,negative regulation of gene expression,positive regulation of neuron projection development,positive regulation of phosphatidylinositol 3-kinase signaling,peptidyl-tyrosine phosphorylation,…	G-protein coupled receptor binding,protein kinase activity,protein tyrosine kinase activity,non-membrane spanning protein tyrosine kinase activity,signal transducer activity,protein binding,ATP binding,tubulin binding,enzyme binding,type 5 metabotropic glutamate receptor binding,T cell receptor binding,CD4 receptor binding,CD8 receptor binding,identical protein binding,phosphatidylinositol 3-kina…	nucleus,mitochondrion,endosome,cytosol,actin filament,plasma membrane,postsynaptic density,dendrite,extrinsic component of cytoplasmic side of plasma membrane,membrane raft,cell periphery	sp	1	4	uniprot_mouse_proteome	>sp|P39688|FYN_MOUSE Tyrosine-protein kinase Fyn OS=Mus musculus GN=Fyn PE=1 SV=4	2	2
TRUE	Old_Decellularized / Young_Decellularized	Old_Decellularized	Young_Decellularized	10	P58742	127764	82207.8	-0.636135	0.636135	-35.6565	0.643435	0	0.0459958	0.0366629	9	0.295376	P58742	AAAS_MOUSE	Aladin	Aaas	P58742	Mus musculus	nucleocytoplasmic transport,learning,fertilization,protein transport,mRNA transport	molecular_function	nucleus,nuclear pore,nucleoplasm,centrosome,cytosol,membrane,nuclear membrane	sp	1	1	uniprot_mouse_proteome	>sp|P58742|AAAS_MOUSE Aladin OS=Mus musculus GN=Aaas PE=1 SV=1	2	2
TRUE	Old_Decellularized / Young_Decellularized	Old_Decellularized	Young_Decellularized	10	P70206	35396.1	38944.2	0.137819	0.137819	10.0241	1.10024	0	0.0302718	0.0266467	9	0.161691	P70206	PLXA1_MOUSE	Plexin-A1	Plxna1	P70206	Mus musculus	regulation of smooth muscle cell migration,branchiomotor neuron axon guidance,regulation of axon extension involved in axon guidance,dichotomous subdivision of terminal units involved in salivary gland branching,semaphorin-plexin signaling pathway,neuron projection guidance,neuron projection extension	protein binding,semaphorin receptor activity	plasma membrane,membrane,integral component of membrane,extracellular exosome	sp	1	1	uniprot_mouse_proteome	>sp|P70206|PLXA1_MOUSE Plexin-A1 OS=Mus musculus GN=Plxna1 PE=1 SV=1	2	2
TRUE	Old_Decellularized / Young_Decellularized	Old_Decellularized	Young_Decellularized	10	Q3TBU7;Q3U2K8;Q80WC7;Q80WC7-2	20803.2	26802.6	0.36557	0.36557	28.8391	1.28839	0	0.228786	0.123813	9	0.619036	Q3TBU7;Q3U2K8;Q80WC7;Q80WC7-2	Q3TBU7_MOUSE;Q3U2K8_MOUSE;AGFG2_MOUSE;AGFG2_MOUSE	Arf-GAP domain and FG repeat-containing protein 2 (Fragment);Arf-GAP domain and FG repeat-containing protein 2;Arf-GAP domain and FG repeat-containing protein 2;Isoform 2 of Arf-GAP domain and FG repeat-containing protein 2	Agfg2	Q3TBU7;Q3U2K8;Q80WC7;Q80WC7-2	Mus musculus	;;biological_process,positive regulation of GTPase activity;	;;molecular_function,GTPase activator activity,metal ion binding;	;;membrane;	tr;tr;sp;sp	1;1;1;	1;1;1;	uniprot_mouse_proteome	>tr|Q3TBU7|Q3TBU7_MOUSE Arf-GAP domain and FG repeat-containing protein 2 (Fragment) OS=Mus musculus GN=Agfg2 PE=1 SV=1;>tr|Q3U2K8|Q3U2K8_MOUSE Arf-GAP domain and FG repeat-containing protein 2 OS=Mus musculus GN=Agfg2 PE=1 SV=1;>sp|Q80WC7|AGFG2_MOUSE Arf-GAP domain and FG repeat-containing protein 2 OS=Mus musculus GN=Agfg2 PE=1 SV=1;>sp|Q80WC7-2|AGFG2_MOUSE Isoform 2 of Arf-GAP domain and FG re…	2	2
TRUE	Old_Decellularized / Young_Decellularized	Old_Decellularized	Young_Decellularized	10	Q3TFD2;Q3TFD2-2	58699.1	35937.6	-0.707843	0.707843	-38.7765	0.612235	0	0.0351659	0.0298314	9	0.281068	Q3TFD2;Q3TFD2-2	PCAT1_MOUSE	Lysophosphatidylcholine acyltransferase 1;Isoform 2 of Lysophosphatidylcholine acyltransferase 1	Lpcat1	Q3TFD2;Q3TFD2-2	Mus musculus	phospholipid biosynthetic process,phosphatidylcholine acyl-chain remodeling,surfactant homeostasis,positive regulation of protein catabolic process,retina development in camera-type eye,negative regulation of phosphatidylcholine biosynthetic process;	calcium ion binding,1-alkenylglycerophosphocholine O-acyltransferase activity,1-acylglycerophosphocholine O-acyltransferase activity,1-alkylglycerophosphocholine O-acyltransferase activity,1-alkylglycerophosphocholine O-acetyltransferase activity;	Golgi membrane,endoplasmic reticulum,endoplasmic reticulum membrane,Golgi apparatus,lipid particle,membrane,integral component of membrane;	sp	1;	1;	uniprot_mouse_proteome	>sp|Q3TFD2|PCAT1_MOUSE Lysophosphatidylcholine acyltransferase 1 OS=Mus musculus GN=Lpcat1 PE=1 SV=1;>sp|Q3TFD2-2|PCAT1_MOUSE Isoform 2 of Lysophosphatidylcholine acyltransferase 1 OS=Mus musculus GN=Lpcat1	2	2
TRUE	Old_Decellularized / Young_Decellularized	Old_Decellularized	Young_Decellularized	10	Q3U1N2;Q3U1N2-2	69006.3	71505.5	0.0513272	0.0513272	3.62177	1.03622	0	0.536032	0.235267	9	0.067188	Q3U1N2;Q3U1N2-2	SRBP2_MOUSE	Sterol regulatory element-binding protein 2;Isoform 2 of Sterol regulatory element-binding protein 2	Srebf2	Q3U1N2;Q3U1N2-2	Mus musculus	negative regulation of transcription from RNA polymerase II promoter,transcription, DNA-templated,regulation of transcription, DNA-templated,cholesterol metabolic process,cellular response to starvation,positive regulation of cholesterol storage,regulation of cholesterol biosynthetic process,positive regulation of transcription from RNA polymerase II promoter,response to low-density lipoprotein p…	RNA polymerase II core promoter proximal region sequence-specific DNA binding,transcriptional repressor activity, RNA polymerase II core promoter proximal region sequence-specific binding,DNA binding,transcription factor activity, sequence-specific DNA binding,protein binding,protein C-terminus binding,sequence-specific DNA binding,transcription regulatory region DNA binding,protein dimerization …	Golgi membrane,nucleus,nucleoplasm,cytoplasm,mitochondrion,endoplasmic reticulum,ER to Golgi transport vesicle membrane,membrane,SREBP-SCAP-Insig complex,intracellular membrane-bounded organelle;	sp	1;	2;	uniprot_mouse_proteome	>sp|Q3U1N2|SRBP2_MOUSE Sterol regulatory element-binding protein 2 OS=Mus musculus GN=Srebf2 PE=1 SV=2;>sp|Q3U1N2-2|SRBP2_MOUSE Isoform 2 of Sterol regulatory element-binding protein 2 OS=Mus musculus GN=Srebf2	2	2
TRUE	Old_Decellularized / Young_Decellularized	Old_Decellularized	Young_Decellularized	10	Q3UE92;Q6P1B1;S4R1I3	67213.2	51576.3	-0.382037	0.382037	-23.2647	0.767353	0	0.0362571	0.0304605	9	0.163519	Q3UE92;Q6P1B1;S4R1I3	Q3UE92_MOUSE;XPP1_MOUSE;S4R1I3_MOUSE	X-prolyl aminopeptidase (Aminopeptidase P) 1, soluble, isoform CRA_b;Xaa-Pro aminopeptidase 1;Xaa-Pro aminopeptidase 1	Xpnpep1	Q3UE92;Q6P1B1;S4R1I3	Mus musculus	;proteolysis,bradykinin catabolic process;	;aminopeptidase activity,manganese ion binding,protein homodimerization activity,metalloaminopeptidase activity;	;cytoplasm,cytosol,extracellular exosome;	tr;sp;tr	1	1	uniprot_mouse_proteome	>tr|Q3UE92|Q3UE92_MOUSE X-prolyl aminopeptidase (Aminopeptidase P) 1, soluble, isoform CRA_b OS=Mus musculus GN=Xpnpep1 PE=1 SV=1;>sp|Q6P1B1|XPP1_MOUSE Xaa-Pro aminopeptidase 1 OS=Mus musculus GN=Xpnpep1 PE=1 SV=1;>tr|S4R1I3|S4R1I3_MOUSE Xaa-Pro aminopeptidase 1 OS=Mus musculus GN=Xpnpep1 PE=1 SV=1	2	2
TRUE	Old_Decellularized / Young_Decellularized	Old_Decellularized	Young_Decellularized	10	Q3V132	2.45628e+06	2.38794e+06	-0.0407043	0.0407043	-2.78197	0.97218	0	0.504892	0.225274	9	0.064198	Q3V132	ADT4_MOUSE	ADP/ATP translocase 4	Slc25a31	Q3V132	Mus musculus	mitochondrial transport,transmembrane transport	transmembrane transporter activity	nucleus,mitochondrion,mitochondrial inner membrane,integral component of membrane,motile cilium	sp	1	1	uniprot_mouse_proteome	>sp|Q3V132|ADT4_MOUSE ADP/ATP translocase 4 OS=Mus musculus GN=Slc25a31 PE=1 SV=1	2	2
TRUE	Old_Decellularized / Young_Decellularized	Old_Decellularized	Young_Decellularized	10	Q4PLS0	17943.4	5867.41	-1.61265	1.61265	-67.3004	0.326996	0	0.0863199	0.0595512	9	1.77071	Q4PLS0	Q4PLS0_MOUSE	NACHT	Nlrp2	Q4PLS0	Mus musculus	positive regulation of cysteine-type endopeptidase activity involved in apoptotic process,positive regulation of interleukin-1 beta secretion	ATP binding,Pyrin domain binding	cytoplasm,Golgi apparatus,cytosol,intracellular membrane-bounded organelle,nuclear chromosome, telomeric region	tr	2	1	uniprot_mouse_proteome	>tr|Q4PLS0|Q4PLS0_MOUSE NACHT OS=Mus musculus GN=Nlrp2 PE=2 SV=1	2	2
TRUE	Old_Decellularized / Young_Decellularized	Old_Decellularized	Young_Decellularized	10	Q52KR3;Q52KR3-2;Q52KR3-3;Q52KR3-4;Q52KR3-6	50476.6	91598.2	0.859705	0.859705	81.4667	1.81467	0	0.00590697	0.00753429	9	0.311525	Q52KR3;Q52KR3-2;Q52KR3-3;Q52KR3-4;Q52KR3-6	PRUN2_MOUSE	Protein prune homolog 2;Isoform 2 of Protein prune homolog 2;Isoform 3 of Protein prune homolog 2;Isoform 4 of Protein prune homolog 2;Isoform 6 of Protein prune homolog 2	Prune2	Q52KR3;Q52KR3-2;Q52KR3-3;Q52KR3-4;Q52KR3-6	Mus musculus	apoptotic process;;;;	pyrophosphatase activity;;;;	cytoplasm;;;;	sp	1;;;;	2;;;;	uniprot_mouse_proteome	>sp|Q52KR3|PRUN2_MOUSE Protein prune homolog 2 OS=Mus musculus GN=Prune2 PE=1 SV=2;>sp|Q52KR3-2|PRUN2_MOUSE Isoform 2 of Protein prune homolog 2 OS=Mus musculus GN=Prune2;>sp|Q52KR3-3|PRUN2_MOUSE Isoform 3 of Protein prune homolog 2 OS=Mus musculus GN=Prune2;>sp|Q52KR3-4|PRUN2_MOUSE Isoform 4 of Protein prune homolog 2 OS=Mus musculus GN=Prune2;>sp|Q52KR3-6|PRUN2_MOUSE Isoform 6 of Protein prune …	2	2
TRUE	Old_Decellularized / Young_Decellularized	Old_Decellularized	Young_Decellularized	15	Q792Z1	6307802	3720035	-0.761821	0.761821	-41.0249	0.589751	0	0.00140256	0.00228577	14	0.162291	Q792Z1	Q792Z1_MOUSE	MCG140784	Try10	Q792Z1	Mus musculus	proteolysis,digestion	serine-type endopeptidase activity	extracellular space,extracellular exosome,blood microparticle	tr	1	1	uniprot_mouse_proteome	>tr|Q792Z1|Q792Z1_MOUSE MCG140784 OS=Mus musculus GN=Try10 PE=1 SV=1	2	3
TRUE	Old_Decellularized / Young_Decellularized	Old_Decellularized	Young_Decellularized	10	Q8BNI4	318550	221363	-0.525106	0.525106	-30.5092	0.694908	0	0.326541	0.162846	9	0.27045	Q8BNI4	DERL2_MOUSE	Derlin-2	Derl2	Q8BNI4	Mus musculus	suckling behavior,positive regulation of cell proliferation,positive regulation of cell growth,ER-associated ubiquitin-dependent protein catabolic process,endoplasmic reticulum unfolded protein response,retrograde protein transport, ER to cytosol,negative regulation of retrograde protein transport, ER to cytosol	molecular_function	early endosome,late endosome,endoplasmic reticulum,membrane,integral component of endoplasmic reticulum membrane,signal recognition particle receptor complex,signal recognition particle	sp	1	2	uniprot_mouse_proteome	>sp|Q8BNI4|DERL2_MOUSE Derlin-2 OS=Mus musculus GN=Derl2 PE=1 SV=2	2	2
TRUE	Old_Decellularized / Young_Decellularized	Old_Decellularized	Young_Decellularized	10	Q8BVW3	140377	238437	0.764297	0.764297	69.8542	1.69854	0	0.0150786	0.0157064	9	0.241206	Q8BVW3	TRI14_MOUSE	Tripartite motif-containing protein 14	Trim14	Q8BVW3	Mus musculus	negative regulation of viral transcription,innate immune response,positive regulation of sequence-specific DNA binding transcription factor activity,positive regulation of NF-kappaB transcription factor activity	molecular_function,zinc ion binding	cytoplasm	sp	1	2	uniprot_mouse_proteome	>sp|Q8BVW3|TRI14_MOUSE Tripartite motif-containing protein 14 OS=Mus musculus GN=Trim14 PE=1 SV=2	2	2
TRUE	Old_Decellularized / Young_Decellularized	Old_Decellularized	Young_Decellularized	10	Q8K2C8	73199.1	56384.3	-0.376533	0.376533	-22.9713	0.770287	0	0.0240336	0.022444	9	0.170796	Q8K2C8	GPAT4_MOUSE	Glycerol-3-phosphate acyltransferase 4	Gpat4	Q8K2C8	Mus musculus	glandular epithelial cell maturation,fatty acid metabolic process,acyl-CoA metabolic process,triglyceride metabolic process,phosphatidylcholine biosynthetic process,lactation,lipid biosynthetic process,CDP-diacylglycerol biosynthetic process,triglyceride biosynthetic process,mammary gland development,regulation of multicellular organism growth,diacylglycerol metabolic process	glycerol-3-phosphate O-acyltransferase activity,Requires Ontology	endoplasmic reticulum,membrane,integral component of endoplasmic reticulum membrane	sp	1	1	uniprot_mouse_proteome	>sp|Q8K2C8|GPAT4_MOUSE Glycerol-3-phosphate acyltransferase 4 OS=Mus musculus GN=Gpat4 PE=1 SV=1	2	2
TRUE	Old_Decellularized / Young_Decellularized	Old_Decellularized	Young_Decellularized	10	Q923G2	128283	104663	-0.293575	0.293575	-18.4122	0.815878	0	0.0258823	0.023659	9	0.10685	Q923G2	RPAB3_MOUSE	DNA-directed RNA polymerases I, II, and III subunit RPABC3	Polr2h	Q923G2	Mus musculus	transcription from RNA polymerase I promoter,transcription from RNA polymerase II promoter,transcription from RNA polymerase III promoter	single-stranded DNA binding,RNA polymerase I activity,RNA polymerase II activity,RNA polymerase III activity	nucleus,nucleoplasm,DNA-directed RNA polymerase II, core complex,DNA-directed RNA polymerase III complex,DNA-directed RNA polymerase I complex,protein-DNA complex	sp	1	3	uniprot_mouse_proteome	>sp|Q923G2|RPAB3_MOUSE DNA-directed RNA polymerases I, II, and III subunit RPABC3 OS=Mus musculus GN=Polr2h PE=1 SV=3	2	2
TRUE	Old_Decellularized / Young_Decellularized	Old_Decellularized	Young_Decellularized	10	Q99LB6;Q99LB6-2	71031.9	58253.9	-0.286114	0.286114	-17.9892	0.820108	0	0.152917	0.0922807	9	0.153067	Q99LB6;Q99LB6-2	MAT2B_MOUSE	Methionine adenosyltransferase 2 subunit beta;Isoform 2 of Methionine adenosyltransferase 2 subunit beta	Mat2b	Q99LB6;Q99LB6-2	Mus musculus	S-adenosylmethionine biosynthetic process,one-carbon metabolic process,regulation of catalytic activity;	enzyme binding,methionine adenosyltransferase regulator activity;	nucleus,mitochondrion,methionine adenosyltransferase complex,extracellular exosome;	sp	1;	1;	uniprot_mouse_proteome	>sp|Q99LB6|MAT2B_MOUSE Methionine adenosyltransferase 2 subunit beta OS=Mus musculus GN=Mat2b PE=1 SV=1;>sp|Q99LB6-2|MAT2B_MOUSE Isoform 2 of Methionine adenosyltransferase 2 subunit beta OS=Mus musculus GN=Mat2b	2	2
TRUE	Old_Decellularized / Young_Decellularized	Old_Decellularized	Young_Decellularized	10	Q99MJ9	32009.3	20605.1	-0.635489	0.635489	-35.6277	0.643723	0	0.218308	0.119733	9	0.388805	Q99MJ9	DDX50_MOUSE	ATP-dependent RNA helicase DDX50	Ddx50	Q99MJ9	Mus musculus	RNA secondary structure unwinding	RNA binding,ATP-dependent RNA helicase activity,ATP binding	nucleolus,cytoplasm,plasma membrane,membrane	sp	2	1	uniprot_mouse_proteome	>sp|Q99MJ9|DDX50_MOUSE ATP-dependent RNA helicase DDX50 OS=Mus musculus GN=Ddx50 PE=2 SV=1	2	2
TRUE	Old_Decellularized / Young_Decellularized	Old_Decellularized	Young_Decellularized	15	Q9CQZ0	448893	415341	-0.112074	0.112074	-7.47431	0.925257	0	0.825235	0.320563	14	0.154914	Q9CQZ0	ORML2_MOUSE	ORM1-like protein 2	Ormdl2	Q9CQZ0	Mus musculus	ceramide metabolic process,cellular sphingolipid homeostasis,negative regulation of ceramide biosynthetic process	molecular_function	endoplasmic reticulum,integral component of membrane,SPOTS complex	sp	1	1	uniprot_mouse_proteome	>sp|Q9CQZ0|ORML2_MOUSE ORM1-like protein 2 OS=Mus musculus GN=Ormdl2 PE=1 SV=1	2	3
TRUE	Old_Decellularized / Young_Decellularized	Old_Decellularized	Young_Decellularized	10	Q9D8U8	353669	323506	-0.128606	0.128606	-8.52853	0.914715	0	0.942287	0.351111	9	0.0971779	Q9D8U8	SNX5_MOUSE	Sorting nexin-5	Snx5	Q9D8U8	Mus musculus	intracellular protein transport,endocytosis,pinocytosis,vesicle organization,retrograde transport, endosome to Golgi	dynactin binding,phosphatidylinositol binding,cadherin binding	ruffle,phagocytic cup,endosome,cytosol,extrinsic component of membrane,cytoplasmic vesicle membrane,retromer complex,extrinsic component of cytoplasmic side of plasma membrane,extrinsic component of endosome membrane,macropinocytic cup,tubular endosome,early endosome membrane	sp	1	1	uniprot_mouse_proteome	>sp|Q9D8U8|SNX5_MOUSE Sorting nexin-5 OS=Mus musculus GN=Snx5 PE=1 SV=1	2	2
TRUE	Old_Decellularized / Young_Decellularized	Old_Decellularized	Young_Decellularized	15	Q9R1Q7	2.38231e+06	2.00143e+06	-0.251326	0.251326	-15.9876	0.840124	0	0.0788646	0.0555362	14	0.129213	Q9R1Q7	PLP2_MOUSE	Proteolipid protein 2	Plp2	Q9R1Q7	Mus musculus		chemokine binding	endoplasmic reticulum membrane,plasma membrane,integral component of membrane,extracellular exosome	sp	1	1	uniprot_mouse_proteome	>sp|Q9R1Q7|PLP2_MOUSE Proteolipid protein 2 OS=Mus musculus GN=Plp2 PE=1 SV=1	2	3
TRUE	Old_Decellularized / Young_Decellularized	Old_Decellularized	Young_Decellularized	10	Q9Z1P6	135256	156773	0.212988	0.212988	15.9087	1.15909	0	0.385812	0.184435	9	0.234961	Q9Z1P6	NDUA7_MOUSE	NADH dehydrogenase [ubiquinone] 1 alpha subcomplex subunit 7	Ndufa7	Q9Z1P6	Mus musculus	mitochondrial electron transport, NADH to ubiquinone,mitochondrial translation	structural constituent of ribosome,NADH dehydrogenase (ubiquinone) activity	mitochondrion,mitochondrial respiratory chain complex I,mitochondrial ribosome	sp	1	3	uniprot_mouse_proteome	>sp|Q9Z1P6|NDUA7_MOUSE NADH dehydrogenase [ubiquinone] 1 alpha subcomplex subunit 7 OS=Mus musculus GN=Ndufa7 PE=1 SV=3	2	2
TRUE	Old_Decellularized / Young_Decellularized	Old_Decellularized	Young_Decellularized	10	A0A0R4J0X8;D3Z0V2;Q9ES28;Q9ES28-2;Q9ES28-3;Q9ES28-4;Q9ES28-7;Q9ES28-8	73123	68974.8	-0.0842572	0.0842572	-5.673	0.94327	0	0.991007	0.363284	9	0.133448	A0A0R4J0X8;D3Z0V2;Q9ES28;Q9ES28-2;Q9ES28-3;Q9ES28-4;Q9ES28-7;Q9ES28-8	A0A0R4J0X8_MOUSE;D3Z0V2_MOUSE;ARHG7_MOUSE;ARHG7_MOUSE;ARHG7_MOUSE;ARHG7_MOUSE;ARHG7_MOUSE;ARHG7_MOUSE	Rho guanine nucleotide exchange factor (GEF7), isoform CRA_a;Rho guanine nucleotide exchange factor 7 (Fragment);Rho guanine nucleotide exchange factor 7;Isoform A of Rho guanine nucleotide exchange factor 7;Isoform C of Rho guanine nucleotide exchange factor 7;Isoform D of Rho guanine nucleotide exchange factor 7;Isoform G of Rho guanine nucleotide exchange factor 7;Isoform H of Rho guanine nucl…	Arhgef7	A0A0R4J0X8;D3Z0V2;Q9ES28;Q9ES28-2;Q9ES28-3;Q9ES28-4;Q9ES28-7;Q9ES28-8	Mus musculus	;;hematopoietic progenitor cell differentiation,Golgi organization,nervous system development,positive regulation of fibroblast migration,lamellipodium assembly,positive regulation of protein binding,regulation of Rho protein signal transduction,intracellular signal transduction,positive regulation of apoptotic process,positive regulation of GTPase activity,focal adhesion assembly,positive regula…	;;guanyl-nucleotide exchange factor activity,Rho guanyl-nucleotide exchange factor activity,protein binding,protein kinase binding;;;;;	;;storage vacuole,ruffle,cytosol,plasma membrane,focal adhesion,cell cortex,lamellipodium,neuron projection,neuronal cell body,protein complex;;;;;	tr;tr;sp;sp;sp;sp;sp;sp	1;1;1;;;;;	1;2;2;;;;;	uniprot_mouse_proteome	>tr|A0A0R4J0X8|A0A0R4J0X8_MOUSE Rho guanine nucleotide exchange factor (GEF7), isoform CRA_a OS=Mus musculus GN=Arhgef7 PE=1 SV=1;>tr|D3Z0V2|D3Z0V2_MOUSE Rho guanine nucleotide exchange factor 7 (Fragment) OS=Mus musculus GN=Arhgef7 PE=1 SV=2;>sp|Q9ES28|ARHG7_MOUSE Rho guanine nucleotide exchange factor 7 OS=Mus musculus GN=Arhgef7 PE=1 SV=2;>sp|Q9ES28-2|ARHG7_MOUSE Isoform A of Rho guanine nucle…	2	2
TRUE	Old_Decellularized / Young_Decellularized	Old_Decellularized	Young_Decellularized	10	A0A0R4J1I3;D3YZC2;F8WHD9;O88559;O88559-2	56406	50429.3	-0.161585	0.161585	-10.5958	0.894042	0	0.391623	0.186462	9	0.147072	A0A0R4J1I3;D3YZC2;F8WHD9;O88559;O88559-2	A0A0R4J1I3_MOUSE;D3YZC2_MOUSE;F8WHD9_MOUSE;MEN1_MOUSE;MEN1_MOUSE	Menin;Menin;Menin;Menin;Isoform 2 of Menin	Men1	A0A0R4J1I3;D3YZC2;F8WHD9;O88559;O88559-2	Mus musculus	;;;negative regulation of transcription from RNA polymerase II promoter,MAPK cascade,ossification,leukocyte homeostasis,negative regulation of protein phosphorylation,osteoblast fate commitment,osteoblast development,chromatin remodeling,transcription, DNA-templated,cellular response to DNA damage stimulus,cell cycle arrest,negative regulation of cell proliferation,response to UV,response to gamm…	;;;four-way junction DNA binding,Y-form DNA binding,DNA binding,chromatin binding,double-stranded DNA binding,protein binding,protein binding, bridging,sequence-specific DNA binding,transcription regulatory region DNA binding,protein N-terminus binding,R-SMAD binding,histone-lysine N-methyltransferase activity;	;;;nuclear chromosome, telomeric region,chromatin,nuclear chromatin,nucleus,nucleoplasm,cytoplasm,cytosol,nuclear matrix,cleavage furrow,histone methyltransferase complex,protein complex;	tr;tr;tr;sp;sp	1;1;1;1;	1;1;1;2;	uniprot_mouse_proteome	>tr|A0A0R4J1I3|A0A0R4J1I3_MOUSE Menin OS=Mus musculus GN=Men1 PE=1 SV=1;>tr|D3YZC2|D3YZC2_MOUSE Menin OS=Mus musculus GN=Men1 PE=1 SV=1;>tr|F8WHD9|F8WHD9_MOUSE Menin OS=Mus musculus GN=Men1 PE=1 SV=1;>sp|O88559|MEN1_MOUSE Menin OS=Mus musculus GN=Men1 PE=1 SV=2;>sp|O88559-2|MEN1_MOUSE Isoform 2 of Menin OS=Mus musculus GN=Men1	2	2
TRUE	Old_Decellularized / Young_Decellularized	Old_Decellularized	Young_Decellularized	10	D3YU21;D3YZD6;D3Z6I4;Q921W4;Q921W4-2	143208	134911	-0.0861041	0.0861041	-5.79367	0.942063	0	0.235767	0.126392	9	0.190395	D3YU21;D3YZD6;D3Z6I4;Q921W4;Q921W4-2	D3YU21_MOUSE;D3YZD6_MOUSE;D3Z6I4_MOUSE;QORL1_MOUSE;QORL1_MOUSE	Crystallin, zeta (Quinone reductase)-like 1, isoform CRA_f;Quinone oxidoreductase-like protein 1;Crystallin, zeta (Quinone reductase)-like 1, isoform CRA_h;Quinone oxidoreductase-like protein 1;Isoform 2 of Quinone oxidoreductase-like protein 1	Cryzl1	D3YU21;D3YZD6;D3Z6I4;Q921W4;Q921W4-2	Mus musculus	;;;oxidation-reduction process;	;;;oxidoreductase activity;	;;;cytosol;	tr;tr;tr;sp;sp	1;1;1;1;	1;1;1;1;	uniprot_mouse_proteome	>tr|D3YU21|D3YU21_MOUSE Crystallin, zeta (Quinone reductase)-like 1, isoform CRA_f OS=Mus musculus GN=Cryzl1 PE=1 SV=1;>tr|D3YZD6|D3YZD6_MOUSE Quinone oxidoreductase-like protein 1 OS=Mus musculus GN=Cryzl1 PE=1 SV=1;>tr|D3Z6I4|D3Z6I4_MOUSE Crystallin, zeta (Quinone reductase)-like 1, isoform CRA_h OS=Mus musculus GN=Cryzl1 PE=1 SV=1;>sp|Q921W4|QORL1_MOUSE Quinone oxidoreductase-like protein 1 OS…	2	2
TRUE	Old_Decellularized / Young_Decellularized	Old_Decellularized	Young_Decellularized	10	D3YU80;K4DI65;P60824	117159	91549.3	-0.355845	0.355845	-21.8588	0.781412	0	0.35655	0.173945	9	0.265825	D3YU80;K4DI65;P60824	D3YU80_MOUSE;K4DI65_MOUSE;CIRBP_MOUSE	Cold-inducible RNA-binding protein (Fragment);Cold inducible RNA binding protein, isoform CRA_a;Cold-inducible RNA-binding protein	Cirbp	D3YU80;K4DI65;P60824	Mus musculus	;;response to UV,negative regulation of translation,negative regulation of cell growth,stress granule assembly,positive regulation of translation,mRNA stabilization,cellular response to cold,regulation of cell cycle G1/S phase transition	;;RNA binding,mRNA 3'-UTR binding,poly(U) RNA binding,translation repressor activity,small ribosomal subunit rRNA binding	;;nucleus,nucleoplasm,nucleolus,cytoplasm,cytoplasmic stress granule	tr;tr;sp	1	1	uniprot_mouse_proteome	>tr|D3YU80|D3YU80_MOUSE Cold-inducible RNA-binding protein (Fragment) OS=Mus musculus GN=Cirbp PE=1 SV=1;>tr|K4DI65|K4DI65_MOUSE Cold inducible RNA binding protein, isoform CRA_a OS=Mus musculus GN=Cirbp PE=1 SV=1;>sp|P60824|CIRBP_MOUSE Cold-inducible RNA-binding protein OS=Mus musculus GN=Cirbp PE=1 SV=1	2	2
TRUE	Old_Decellularized / Young_Decellularized	Old_Decellularized	Young_Decellularized	15	D3Z136;Q8BHI7	729174	810634	0.152786	0.152786	11.1714	1.11171	0	0.0437895	0.0353589	14	0.170625	D3Z136;Q8BHI7	D3Z136_MOUSE;ELOV5_MOUSE	Elongation of very long chain fatty acids protein (Fragment);Elongation of very long chain fatty acids protein 5	Elovl5	D3Z136;Q8BHI7	Mus musculus	;unsaturated fatty acid biosynthetic process,fatty acid elongation, saturated fatty acid,sphingolipid biosynthetic process,fatty acid elongation, monounsaturated fatty acid,fatty acid elongation, polyunsaturated fatty acid,very long-chain fatty acid biosynthetic process,positive regulation of fatty acid biosynthetic process	;fatty acid elongase activity,3-oxo-arachidoyl-CoA synthase activity,3-oxo-cerotoyl-CoA synthase activity,3-oxo-lignoceronyl-CoA synthase activity,Requires Ontology	;endoplasmic reticulum,membrane,integral component of endoplasmic reticulum membrane,dendrite,neuronal cell body,dendritic tree	tr;sp	1	1	uniprot_mouse_proteome	>tr|D3Z136|D3Z136_MOUSE Elongation of very long chain fatty acids protein (Fragment) OS=Mus musculus GN=Elovl5 PE=1 SV=1;>sp|Q8BHI7|ELOV5_MOUSE Elongation of very long chain fatty acids protein 5 OS=Mus musculus GN=Elovl5 PE=1 SV=1	2	3
TRUE	Old_Decellularized / Young_Decellularized	Old_Decellularized	Young_Decellularized	10	E0CX59;E0CXK9;Q9CQ73	28074.9	37297.8	0.40981	0.40981	32.8511	1.32851	0	0.0627972	0.0467618	9	0.201591	E0CX59;E0CXK9;Q9CQ73	E0CX59_MOUSE;E0CXK9_MOUSE;Q9CQ73_MOUSE	Protein Pkp2;Protein Pkp2;Plakophilin 2	Pkp2	E0CX59;E0CXK9;Q9CQ73	Mus musculus	;;desmosome assembly,heart development,intermediate filament bundle assembly,maintenance of animal organ identity,ventricular cardiac muscle tissue morphogenesis,protein localization to plasma membrane,cardiac muscle cell action potential involved in contraction,ventricular cardiac muscle cell action potential,cell-cell signaling involved in cardiac conduction,bundle of His cell-Purkinje myocyte …	;;protein kinase C binding,protein binding,intermediate filament binding,protein complex scaffold,alpha-catenin binding,cadherin binding	;;nucleoplasm,intermediate filament,plasma membrane,cell-cell junction,adherens junction,intercalated disc,cell junction,desmosome	tr	1	1	uniprot_mouse_proteome	>tr|E0CX59|E0CX59_MOUSE Protein Pkp2 OS=Mus musculus GN=Pkp2 PE=1 SV=1;>tr|E0CXK9|E0CXK9_MOUSE Protein Pkp2 OS=Mus musculus GN=Pkp2 PE=1 SV=1;>tr|Q9CQ73|Q9CQ73_MOUSE Plakophilin 2 OS=Mus musculus GN=Pkp2 PE=1 SV=1	2	2
TRUE	Old_Decellularized / Young_Decellularized	Old_Decellularized	Young_Decellularized	10	E9PXW9;Q08369	68844.6	45948	-0.58334	0.58334	-33.2583	0.667417	0	0.0231664	0.0218055	9	0.157096	E9PXW9;Q08369	E9PXW9_MOUSE;GATA4_MOUSE	Transcription factor GATA-4	Gata4	E9PXW9;Q08369	Mus musculus	;in utero embryonic development,gastrulation with mouth forming second,endoderm formation,positive regulation of protein phosphorylation,heart looping,heart morphogenesis,outflow tract morphogenesis,atrioventricular valve morphogenesis,atrioventricular valve formation,mitral valve formation,tricuspid valve formation,endocardial cushion development,cardiac right ventricle morphogenesis,ventricular…	;RNA polymerase II regulatory region sequence-specific DNA binding,RNA polymerase II core promoter proximal region sequence-specific DNA binding,RNA polymerase II transcription factor activity, sequence-specific DNA binding,transcription factor activity, RNA polymerase II transcription factor binding,RNA polymerase II transcription factor binding,transcriptional activator activity, RNA polymerase…	;nuclear chromatin,nucleus,transcription factor complex,nuclear body,RNA polymerase II transcription factor complex	tr;sp	1	1;4	uniprot_mouse_proteome	>tr|E9PXW9|E9PXW9_MOUSE Transcription factor GATA-4 OS=Mus musculus GN=Gata4 PE=1 SV=1;>sp|Q08369|GATA4_MOUSE Transcription factor GATA-4 OS=Mus musculus GN=Gata4 PE=1 SV=4	2	2
TRUE	Old_Decellularized / Young_Decellularized	Old_Decellularized	Young_Decellularized	10	J3QP87;M0QWL1;Q3TQZ4;Q3UTA4;Q8BX20	74579.5	76532.4	0.0372917	0.0372917	2.61856	1.02619	0	0.273842	0.142518	9	1.48738	J3QP87;M0QWL1;Q3TQZ4;Q3UTA4;Q8BX20	J3QP87_MOUSE;M0QWL1_MOUSE;Q3TQZ4_MOUSE;Q3UTA4_MOUSE;Q8BX20_MOUSE	Protein Gm2035;Protein Gm21936;Protein Gm2016;Protein Gm8300;Predicted gene, EG435337	Gm2035;Gm21936;Gm2016;Gm8332;Gm5662	J3QP87;M0QWL1;Q3TQZ4;Q3UTA4;Q8BX20	Mus musculus	translational initiation;;translational initiation,biological_process;translational initiation,biological_process;translational initiation,biological_process	translation initiation factor activity;;molecular_function,translation initiation factor activity;molecular_function,translation initiation factor activity;molecular_function,translation initiation factor activity	;;cellular_component;cellular_component;cellular_component	tr	3;3;2;2;2	1	uniprot_mouse_proteome	>tr|J3QP87|J3QP87_MOUSE Protein Gm2035 OS=Mus musculus GN=Gm2035 PE=3 SV=1;>tr|M0QWL1|M0QWL1_MOUSE Protein Gm21936 OS=Mus musculus GN=Gm21936 PE=3 SV=1;>tr|Q3TQZ4|Q3TQZ4_MOUSE Protein Gm2016 OS=Mus musculus GN=Gm2016 PE=2 SV=1;>tr|Q3UTA4|Q3UTA4_MOUSE Protein Gm8300 OS=Mus musculus GN=Gm8332 PE=2 SV=1;>tr|Q8BX20|Q8BX20_MOUSE Predicted gene, EG435337 OS=Mus musculus GN=Gm5662 PE=2 SV=1	2	2
TRUE	Old_Decellularized / Young_Decellularized	Old_Decellularized	Young_Decellularized	10	O54865;Q80YP4	35115.3	30680.2	-0.194788	0.194788	-12.6299	0.873701	0	0.0878292	0.0603007	9	0.197481	O54865;Q80YP4	GCYB1_MOUSE;Q80YP4_MOUSE	Guanylate cyclase soluble subunit beta-1	Gucy1b3	O54865;Q80YP4	Mus musculus	cGMP biosynthetic process,cGMP-mediated signaling,nitric oxide-cGMP-mediated signaling pathway,cellular response to nitric oxide,trans-synaptic signaling by nitric oxide, modulating synaptic transmission;	guanylate cyclase activity,GTP binding,heme binding,metal ion binding,protein heterodimerization activity,cytidylate cyclase activity,Hsp90 protein binding,adenylate cyclase activity;	cytoplasm,plasma membrane,guanylate cyclase complex, soluble,presynaptic active zone;	sp;tr	1	1	uniprot_mouse_proteome	>sp|O54865|GCYB1_MOUSE Guanylate cyclase soluble subunit beta-1 OS=Mus musculus GN=Gucy1b3 PE=1 SV=1;>tr|Q80YP4|Q80YP4_MOUSE Guanylate cyclase soluble subunit beta-1 OS=Mus musculus GN=Gucy1b3 PE=1 SV=1	2	2
TRUE	Old_Decellularized / Young_Decellularized	Old_Decellularized	Young_Decellularized	10	O88587;O88587-2	41580.1	50291.6	0.274422	0.274422	20.9509	1.20951	0	0.0278139	0.0250296	9	0.260267	O88587;O88587-2	COMT_MOUSE	Catechol O-methyltransferase;Isoform Soluble of Catechol O-methyltransferase	Comt	O88587;O88587-2	Mus musculus	female pregnancy,learning,short-term memory,estrogen metabolic process,catechol-containing compound metabolic process,response to organic cyclic compound,cellular response to phosphate starvation,methylation,response to lipopolysaccharide,developmental process,negative regulation of renal sodium excretion,neurotransmitter catabolic process,dopamine metabolic process,dopamine catabolic process,res…	magnesium ion binding,catechol O-methyltransferase activity,Requires Ontology;	mitochondrion,cytosol,membrane,integral component of membrane,axon,dendritic spine,cell body,postsynaptic membrane,extracellular exosome;	sp	1;	2;	uniprot_mouse_proteome	>sp|O88587|COMT_MOUSE Catechol O-methyltransferase OS=Mus musculus GN=Comt PE=1 SV=2;>sp|O88587-2|COMT_MOUSE Isoform Soluble of Catechol O-methyltransferase OS=Mus musculus GN=Comt	2	2
TRUE	Old_Decellularized / Young_Decellularized	Old_Decellularized	Young_Decellularized	10	P03930	662709	1.13659e+06	0.778268	0.778268	71.507	1.71507	0	0.00107025	0.00183215	9	0.160163	P03930	ATP8_MOUSE	ATP synthase protein 8	Mtatp8	P03930	Mus musculus	ATP synthesis coupled proton transport,response to hyperoxia	hydrogen ion transmembrane transporter activity,ATPase activity	mitochondrial proton-transporting ATP synthase complex, coupling factor F(o),mitochondrion,mitochondrial proton-transporting ATP synthase complex,integral component of membrane	sp	1	1	uniprot_mouse_proteome	>sp|P03930|ATP8_MOUSE ATP synthase protein 8 OS=Mus musculus GN=Mtatp8 PE=1 SV=1	2	2
TRUE	Old_Decellularized / Young_Decellularized	Old_Decellularized	Young_Decellularized	10	P11247	29905.3	17328.3	-0.787267	0.787267	-42.0559	0.579441	0	0.189618	0.107899	9	0.38868	P11247	PERM_MOUSE	Myeloperoxidase	Mpo	P11247	Mus musculus	response to yeast,hypochlorous acid biosynthetic process,respiratory burst involved in defense response,aging,response to mechanical stimulus,removal of superoxide radicals,response to food,response to lipopolysaccharide,low-density lipoprotein particle remodeling,defense response to bacterium,hydrogen peroxide catabolic process,negative regulation of growth of symbiont in host,defense response t…	peroxidase activity,heparin binding,heme binding,metal ion binding	extracellular space,nucleus,mitochondrion,secretory granule,azurophil granule,intracellular membrane-bounded organelle,extracellular exosome	sp	1	2	uniprot_mouse_proteome	>sp|P11247|PERM_MOUSE Myeloperoxidase OS=Mus musculus GN=Mpo PE=1 SV=2	2	2
TRUE	Old_Decellularized / Young_Decellularized	Old_Decellularized	Young_Decellularized	10	P70279	35142.1	32463.2	-0.114393	0.114393	-7.62289	0.923771	0	0.560271	0.243062	9	0.197062	P70279	SURF6_MOUSE	Surfeit locus protein 6	Surf6	P70279	Mus musculus	ribosome biogenesis,ribosome assembly,ribosomal large subunit biogenesis,ribosomal small subunit biogenesis	DNA binding,RNA binding	granular component,nucleoplasm,nucleolus,cytosolic large ribosomal subunit	sp	1	1	uniprot_mouse_proteome	>sp|P70279|SURF6_MOUSE Surfeit locus protein 6 OS=Mus musculus GN=Surf6 PE=1 SV=1	2	2
TRUE	Old_Decellularized / Young_Decellularized	Old_Decellularized	Young_Decellularized	10	Q3U1V6	128017	111295	-0.201944	0.201944	-13.0622	0.869378	0	0.166744	0.0983188	9	0.127369	Q3U1V6	UEVLD_MOUSE	Ubiquitin-conjugating enzyme E2 variant 3	Uevld	Q3U1V6	Mus musculus	carbohydrate metabolic process,cellular protein modification process,protein transport,carboxylic acid metabolic process,oxidation-reduction process	oxidoreductase activity, acting on the CH-OH group of donors, NAD or NADP as acceptor	extracellular exosome	sp	1	1	uniprot_mouse_proteome	>sp|Q3U1V6|UEVLD_MOUSE Ubiquitin-conjugating enzyme E2 variant 3 OS=Mus musculus GN=Uevld PE=1 SV=1	2	2
TRUE	Old_Decellularized / Young_Decellularized	Old_Decellularized	Young_Decellularized	10	Q61420	151408	131613	-0.202138	0.202138	-13.0739	0.869261	0	0.216896	0.119183	9	0.139459	Q61420	S35A1_MOUSE	CMP-sialic acid transporter	Slc35a1	Q61420	Mus musculus	carbohydrate transport,proton transport	sugar:proton symporter activity	Golgi membrane,integral component of membrane	sp	1	2	uniprot_mouse_proteome	>sp|Q61420|S35A1_MOUSE CMP-sialic acid transporter OS=Mus musculus GN=Slc35a1 PE=1 SV=2	2	2
TRUE	Old_Decellularized / Young_Decellularized	Old_Decellularized	Young_Decellularized	10	Q61735-2	254570	356417	0.485505	0.485505	40.0076	1.40008	0	0.0542197	0.0418384	9	0.176242	Q61735-2	CD47_MOUSE	Isoform 2 of Leukocyte surface antigen CD47	Cd47	Q61735-2	Mus musculus				sp			uniprot_mouse_proteome	>sp|Q61735-2|CD47_MOUSE Isoform 2 of Leukocyte surface antigen CD47 OS=Mus musculus GN=Cd47	2	2
TRUE	Old_Decellularized / Young_Decellularized	Old_Decellularized	Young_Decellularized	10	Q62009;Q62009-2;Q62009-3;Q62009-4;Q62009-5	57061.9	96383	0.756252	0.756252	68.9096	1.6891	0	0.000199553	0.000438258	9	0.136709	Q62009;Q62009-2;Q62009-3;Q62009-4;Q62009-5	POSTN_MOUSE	Periostin;Isoform 2 of Periostin;Isoform 3 of Periostin;Isoform 4 of Periostin;Isoform 5 of Periostin	Postn	Q62009;Q62009-2;Q62009-3;Q62009-4;Q62009-5	Mus musculus	response to hypoxia,negative regulation of cell-matrix adhesion,regulation of systemic arterial blood pressure,cell adhesion,regulation of Notch signaling pathway,response to mechanical stimulus,tissue development,response to muscle activity,positive regulation of smooth muscle cell migration,extracellular matrix organization,response to estradiol,cellular response to fibroblast growth factor sti…	heparin binding,metal ion binding;;;;	proteinaceous extracellular matrix,extracellular space,trans-Golgi network,extracellular matrix,neuromuscular junction;;;;	sp	1;;;;	2;;;;	uniprot_mouse_proteome	>sp|Q62009|POSTN_MOUSE Periostin OS=Mus musculus GN=Postn PE=1 SV=2;>sp|Q62009-2|POSTN_MOUSE Isoform 2 of Periostin OS=Mus musculus GN=Postn;>sp|Q62009-3|POSTN_MOUSE Isoform 3 of Periostin OS=Mus musculus GN=Postn;>sp|Q62009-4|POSTN_MOUSE Isoform 4 of Periostin OS=Mus musculus GN=Postn;>sp|Q62009-5|POSTN_MOUSE Isoform 5 of Periostin OS=Mus musculus GN=Postn	2	2
TRUE	Old_Decellularized / Young_Decellularized	Old_Decellularized	Young_Decellularized	10	Q64374	80027.7	27074.3	-1.56357	1.56357	-66.1688	0.338312	0	0.312995	0.157993	9	0.745442	Q64374	RGN_MOUSE	Regucalcin	Rgn	Q64374	Mus musculus	kidney development,negative regulation of protein kinase activity,cellular calcium ion homeostasis,spermatogenesis,aging,positive regulation of triglyceride biosynthetic process,positive regulation of glucose metabolic process,positive regulation of phosphatase activity,L-ascorbic acid biosynthetic process,negative regulation of phosphoprotein phosphatase activity,positive regulation of ATPase ac…	gluconolactonase activity,calcium ion binding,zinc ion binding,enzyme regulator activity	extracellular region,nucleus,cytoplasm,cytosol	sp	1	1	uniprot_mouse_proteome	>sp|Q64374|RGN_MOUSE Regucalcin OS=Mus musculus GN=Rgn PE=1 SV=1	2	2
TRUE	Old_Decellularized / Young_Decellularized	Old_Decellularized	Young_Decellularized	10	Q6DVA0	73990.3	70836.4	-0.0628461	0.0628461	-4.26264	0.957374	0	0.588587	0.251069	9	0.0917644	Q6DVA0	LEMD2_MOUSE	LEM domain-containing protein 2	Lemd2	Q6DVA0	Mus musculus	nuclear envelope organization,neurogenesis,negative regulation of BMP signaling pathway,skeletal muscle cell differentiation,negative regulation of MAPK cascade,negative regulation of protein kinase B signaling,heart formation,meiotic attachment of telomere to nuclear envelope,protein localization to chromatin	chromatin DNA binding	chromatin,integral component of nuclear inner membrane,endoplasmic reticulum,membrane,nuclear membrane	sp	1	1	uniprot_mouse_proteome	>sp|Q6DVA0|LEMD2_MOUSE LEM domain-containing protein 2 OS=Mus musculus GN=Lemd2 PE=1 SV=1	2	2
TRUE	Old_Decellularized / Young_Decellularized	Old_Decellularized	Young_Decellularized	10	Q6GV12	82443.8	78377	-0.0729799	0.0729799	-4.93276	0.950672	0	0.807842	0.315008	9	0.310618	Q6GV12	KDSR_MOUSE	3-ketodihydrosphingosine reductase	Kdsr	Q6GV12	Mus musculus	3-keto-sphinganine metabolic process,sphingolipid biosynthetic process,oxidation-reduction process	3-dehydrosphinganine reductase activity	endoplasmic reticulum,endoplasmic reticulum membrane,membrane,integral component of membrane	sp	1	1	uniprot_mouse_proteome	>sp|Q6GV12|KDSR_MOUSE 3-ketodihydrosphingosine reductase OS=Mus musculus GN=Kdsr PE=1 SV=1	2	2
TRUE	Old_Decellularized / Young_Decellularized	Old_Decellularized	Young_Decellularized	10	Q6ZWM4	69785.7	52793.7	-0.402564	0.402564	-24.3488	0.756512	0	0.04214	0.0343185	9	0.137495	Q6ZWM4	LSM8_MOUSE	U6 snRNA-associated Sm-like protein LSm8	Lsm8	Q6ZWM4	Mus musculus	mRNA splicing, via spliceosome	RNA binding	U6 snRNP,U4/U6 x U5 tri-snRNP complex,precatalytic spliceosome	sp	1	3	uniprot_mouse_proteome	>sp|Q6ZWM4|LSM8_MOUSE U6 snRNA-associated Sm-like protein LSm8 OS=Mus musculus GN=Lsm8 PE=1 SV=3	2	2
TRUE	Old_Decellularized / Young_Decellularized	Old_Decellularized	Young_Decellularized	10	Q78IK2	2.02413e+06	2.87439e+06	0.505954	0.505954	42.0062	1.42006	0	0.000121038	0.000284818	9	0.0743519	Q78IK2	USMG5_MOUSE	Up-regulated during skeletal muscle growth protein 5	Usmg5	Q78IK2	Mus musculus	biological_process	molecular_function	mitochondrion,mitochondrial inner membrane,mitochondrial proton-transporting ATP synthase complex,integral component of membrane,extracellular exosome	sp	1	1	uniprot_mouse_proteome	>sp|Q78IK2|USMG5_MOUSE Up-regulated during skeletal muscle growth protein 5 OS=Mus musculus GN=Usmg5 PE=1 SV=1	2	2
TRUE	Old_Decellularized / Young_Decellularized	Old_Decellularized	Young_Decellularized	10	Q80ZM5	415774	263554	-0.657699	0.657699	-36.6112	0.633888	0	0.00109274	0.0018617	9	0.125609	Q80ZM5	Q80ZM5_MOUSE	H1 histone family, member X	H1fx	Q80ZM5	Mus musculus	nucleosome assembly	DNA binding,RNA binding,protein binding,cadherin binding	nucleosome,nucleus,nucleolus	tr	1	1	uniprot_mouse_proteome	>tr|Q80ZM5|Q80ZM5_MOUSE H1 histone family, member X OS=Mus musculus GN=H1fx PE=1 SV=1	2	2
TRUE	Old_Decellularized / Young_Decellularized	Old_Decellularized	Young_Decellularized	10	Q8BFY6	33352.4	34752.7	0.0593331	0.0593331	4.1984	1.04198	0	0.3572	0.174202	9	0.194974	Q8BFY6	PEF1_MOUSE	Peflin	Pef1	Q8BFY6	Mus musculus	proteolysis,ER to Golgi vesicle-mediated transport,neural crest formation,neural crest cell development,COPII vesicle coating,response to calcium ion,positive regulation of protein monoubiquitination	RNA binding,calcium-dependent cysteine-type endopeptidase activity,calcium ion binding,protein heterodimerization activity,protein dimerization activity,calcium-dependent protein binding,binding, bridging	Golgi membrane,cytoplasm,endoplasmic reticulum,COPII vesicle coat,extracellular exosome,Cul3-RING ubiquitin ligase complex	sp	1	1	uniprot_mouse_proteome	>sp|Q8BFY6|PEF1_MOUSE Peflin OS=Mus musculus GN=Pef1 PE=1 SV=1	2	2
TRUE	Old_Decellularized / Young_Decellularized	Old_Decellularized	Young_Decellularized	10	Q8C0D5	73888.6	69351.7	-0.0914199	0.0914199	-6.14014	0.938599	0	0.857498	0.328354	9	0.199341	Q8C0D5	EFL1_MOUSE	Elongation factor-like GTPase 1	Efl1	Q8C0D5	Mus musculus	translational elongation,mature ribosome assembly,GTP metabolic process	translation elongation factor activity,GTPase activity,GTP binding,ribosome binding		sp	1	1	uniprot_mouse_proteome	>sp|Q8C0D5|EFL1_MOUSE Elongation factor-like GTPase 1 OS=Mus musculus GN=Efl1 PE=1 SV=1	2	2
TRUE	Old_Decellularized / Young_Decellularized	Old_Decellularized	Young_Decellularized	10	Q8C259;Q8C6U2	98645.8	150898	0.613246	0.613246	52.9697	1.5297	0	0.00599526	0.00761965	9	0.18596	Q8C259;Q8C6U2	Q8C259_MOUSE;PQLC3_MOUSE	PQ-loop repeat-containing protein 3	Pqlc3	Q8C259;Q8C6U2	Mus musculus	;dolichol-linked oligosaccharide biosynthetic process	;molecular_function	;integral component of membrane	tr;sp	1	1	uniprot_mouse_proteome	>tr|Q8C259|Q8C259_MOUSE PQ-loop repeat-containing protein 3 OS=Mus musculus GN=Pqlc3 PE=1 SV=1;>sp|Q8C6U2|PQLC3_MOUSE PQ-loop repeat-containing protein 3 OS=Mus musculus GN=Pqlc3 PE=1 SV=1	2	2
TRUE	Old_Decellularized / Young_Decellularized	Old_Decellularized	Young_Decellularized	10	Q91W86	91511.2	91859.5	0.0054808	0.0054808	0.380623	1.00381	0	0.440257	0.203635	9	0.0791362	Q91W86	VPS11_MOUSE	Vacuolar protein sorting-associated protein 11 homolog	Vps11	Q91W86	Mus musculus	intracellular protein transport,vesicle docking involved in exocytosis,autophagy,endosome organization,lysosome organization,endosome to lysosome transport,regulation of protein stability,endosomal vesicle fusion,regulation of SNARE complex assembly,toxin transport,regulation of organelle assembly,positive regulation of cellular protein catabolic process,positive regulation of protein targeting t…	nucleotide binding,protein binding,protein domain specific binding,syntaxin binding,protein binding, bridging,metal ion binding	lysosome,lysosomal membrane,endosome,early endosome,late endosome,autophagosome,actin filament,clathrin-coated vesicle,endocytic vesicle,HOPS complex,late endosome membrane,CORVET complex,AP-3 adaptor complex	sp	1	3	uniprot_mouse_proteome	>sp|Q91W86|VPS11_MOUSE Vacuolar protein sorting-associated protein 11 homolog OS=Mus musculus GN=Vps11 PE=1 SV=3	2	2
TRUE	Old_Decellularized / Young_Decellularized	Old_Decellularized	Young_Decellularized	10	Q9CQ88	71542.9	82175.1	0.199893	0.199893	14.8614	1.14861	0	0.346348	0.170425	9	0.583513	Q9CQ88	TSN31_MOUSE	Tetraspanin-31	Tspan31	Q9CQ88	Mus musculus	cell surface receptor signaling pathway	molecular_function	integral component of plasma membrane	sp	1	1	uniprot_mouse_proteome	>sp|Q9CQ88|TSN31_MOUSE Tetraspanin-31 OS=Mus musculus GN=Tspan31 PE=1 SV=1	2	2
TRUE	Old_Decellularized / Young_Decellularized	Old_Decellularized	Young_Decellularized	10	Q9D0L1	50127.7	14132.1	-1.82664	1.82664	-71.8079	0.281921	0	0.000193148	0.00042648	9	0.314958	Q9D0L1	ZBED3_MOUSE	Zinc finger BED domain-containing protein 3	Zbed3	Q9D0L1	Mus musculus	negative regulation of protein phosphorylation,Wnt signaling pathway,positive regulation of transcription from RNA polymerase II promoter,protein stabilization,positive regulation of canonical Wnt signaling pathway,positive regulation of protein targeting to mitochondrion	DNA binding,protein binding,metal ion binding	cytosol,membrane	sp	1	1	uniprot_mouse_proteome	>sp|Q9D0L1|ZBED3_MOUSE Zinc finger BED domain-containing protein 3 OS=Mus musculus GN=Zbed3 PE=1 SV=1	2	2
TRUE	Old_Decellularized / Young_Decellularized	Old_Decellularized	Young_Decellularized	10	Q9DBR0	110578	104941	-0.0754836	0.0754836	-5.09761	0.949024	0	0.376789	0.181337	9	0.0808767	Q9DBR0	AKAP8_MOUSE	A-kinase anchor protein 8	Akap8	Q9DBR0	Mus musculus	transcription, DNA-templated,regulation of transcription, DNA-templated,mitotic chromosome condensation,protein transport,positive regulation of histone deacetylation,negative regulation of tumor necrosis factor production,regulation of histone phosphorylation,cell cycle G2/M phase transition,innate immune response,cellular response to lipopolysaccharide,cellular response to prostaglandin E stimu…	chromatin binding,double-stranded DNA binding,RNA binding,protein binding,zinc ion binding,protein kinase A regulatory subunit binding,histone deacetylase binding,NF-kappaB binding,DEAD/H-box RNA helicase binding	nuclear chromatin,condensed chromosome,female pronucleus,nucleus,nucleoplasm,nucleolus,mitochondrion,Golgi apparatus,membrane,nuclear matrix	sp	1	1	uniprot_mouse_proteome	>sp|Q9DBR0|AKAP8_MOUSE A-kinase anchor protein 8 OS=Mus musculus GN=Akap8 PE=1 SV=1	2	2
TRUE	Old_Decellularized / Young_Decellularized	Old_Decellularized	Young_Decellularized	10	Q9DC48	92851.7	81308.6	-0.191521	0.191521	-12.4318	0.875682	0	0.413037	0.194322	9	0.165661	Q9DC48	PRP17_MOUSE	Pre-mRNA-processing factor 17	Cdc40	Q9DC48	Mus musculus	mRNA splicing, via spliceosome	RNA binding	nucleus,catalytic step 2 spliceosome	sp	2	1	uniprot_mouse_proteome	>sp|Q9DC48|PRP17_MOUSE Pre-mRNA-processing factor 17 OS=Mus musculus GN=Cdc40 PE=2 SV=1	2	2
TRUE	Old_Decellularized / Young_Decellularized	Old_Decellularized	Young_Decellularized	10	Q9EPT5	72098.4	90789.1	0.332553	0.332553	25.924	1.25924	0	0.331771	0.16496	9	0.281589	Q9EPT5	SO2A1_MOUSE	Solute carrier organic anion transporter family member 2A1	Slco2a1	Q9EPT5	Mus musculus	prostaglandin transport,sodium-independent organic anion transport	prostaglandin transmembrane transporter activity,sodium-independent organic anion transmembrane transporter activity	integral component of plasma membrane	sp	1	2	uniprot_mouse_proteome	>sp|Q9EPT5|SO2A1_MOUSE Solute carrier organic anion transporter family member 2A1 OS=Mus musculus GN=Slco2a1 PE=1 SV=2	2	2
TRUE	Old_Decellularized / Young_Decellularized	Old_Decellularized	Young_Decellularized	10	Q9ER72;Q9ER72-2	57123.9	40668.4	-0.490187	0.490187	-28.8067	0.711933	0	0.00516116	0.00669706	9	0.190272	Q9ER72;Q9ER72-2	SYCC_MOUSE	Cysteine--tRNA ligase, cytoplasmic;Isoform 2 of Cysteine--tRNA ligase, cytoplasmic	Cars	Q9ER72;Q9ER72-2	Mus musculus	cysteinyl-tRNA aminoacylation;	tRNA binding,cysteine-tRNA ligase activity,ATP binding,protein homodimerization activity,metal ion binding;	cytoplasm,cytosol;	sp	1;	2;	uniprot_mouse_proteome	>sp|Q9ER72|SYCC_MOUSE Cysteine--tRNA ligase, cytoplasmic OS=Mus musculus GN=Cars PE=1 SV=2;>sp|Q9ER72-2|SYCC_MOUSE Isoform 2 of Cysteine--tRNA ligase, cytoplasmic OS=Mus musculus GN=Cars	2	2
TRUE	Old_Decellularized / Young_Decellularized	Old_Decellularized	Young_Decellularized	10	Q9QZB9	69160.8	54023.1	-0.356377	0.356377	-21.8876	0.781124	0	0.0222314	0.0211911	9	0.328735	Q9QZB9	DCTN5_MOUSE	Dynactin subunit 5	Dctn5	Q9QZB9	Mus musculus	ventricular septum development,aorta development,coronary vasculature development	molecular_function	condensed chromosome kinetochore,nucleoplasm,cytoplasm,centrosome,nuclear membrane	sp	1	1	uniprot_mouse_proteome	>sp|Q9QZB9|DCTN5_MOUSE Dynactin subunit 5 OS=Mus musculus GN=Dctn5 PE=1 SV=1	2	2
TRUE	Old_Decellularized / Young_Decellularized	Old_Decellularized	Young_Decellularized	10	A0A0G2JEH5;Q9D081	89305.7	121515	0.444311	0.444311	36.0664	1.36066	0	0.021343	0.020606	9	0.127153	A0A0G2JEH5;Q9D081	A0A0G2JEH5_MOUSE;ALG14_MOUSE	UDP-N-acetylglucosamine transferase subunit ALG14 homolog (Fragment);UDP-N-acetylglucosamine transferase subunit ALG14 homolog	Alg14	A0A0G2JEH5;Q9D081	Mus musculus	;dolichol-linked oligosaccharide biosynthetic process,biological_process	;molecular_function	;endoplasmic reticulum membrane,integral component of membrane,nuclear membrane	tr;sp	1	1	uniprot_mouse_proteome	>tr|A0A0G2JEH5|A0A0G2JEH5_MOUSE UDP-N-acetylglucosamine transferase subunit ALG14 homolog (Fragment) OS=Mus musculus GN=Alg14 PE=1 SV=1;>sp|Q9D081|ALG14_MOUSE UDP-N-acetylglucosamine transferase subunit ALG14 homolog OS=Mus musculus GN=Alg14 PE=1 SV=1	2	2
TRUE	Old_Decellularized / Young_Decellularized	Old_Decellularized	Young_Decellularized	10	A0A0N4SW50;Q91VX9	210648	199403	-0.0791432	0.0791432	-5.33803	0.94662	0	0.214406	0.118104	9	0.192354	A0A0N4SW50;Q91VX9	A0A0N4SW50_MOUSE;TM168_MOUSE	RIKEN cDNA 8430437G11, isoform CRA_b;Transmembrane protein 168	Tmem168	A0A0N4SW50;Q91VX9	Mus musculus	;biological_process	;molecular_function	;integral component of membrane,transport vesicle	tr;sp	1	1	uniprot_mouse_proteome	>tr|A0A0N4SW50|A0A0N4SW50_MOUSE RIKEN cDNA 8430437G11, isoform CRA_b OS=Mus musculus GN=Tmem168 PE=1 SV=1;>sp|Q91VX9|TM168_MOUSE Transmembrane protein 168 OS=Mus musculus GN=Tmem168 PE=1 SV=1	2	2
TRUE	Old_Decellularized / Young_Decellularized	Old_Decellularized	Young_Decellularized	10	A0A0R4J1H8;E9Q6I3;E9QMY5;Q9QXN0;Q9QXN0-2;Q9QXN0-3;Q9QXN0-4	46559.2	37914.8	-0.296307	0.296307	-18.5666	0.814334	0	0.68291	0.279836	9	0.304601	A0A0R4J1H8;E9Q6I3;E9QMY5;Q9QXN0;Q9QXN0-2;Q9QXN0-3;Q9QXN0-4	A0A0R4J1H8_MOUSE;E9Q6I3_MOUSE;E9QMY5_MOUSE;SHRM3_MOUSE;SHRM3_MOUSE;SHRM3_MOUSE;SHRM3_MOUSE	Protein Shroom3;Protein Shroom3;Protein Shroom3;Protein Shroom3;Isoform 2 of Protein Shroom3;Isoform 3 of Protein Shroom3;Isoform 4 of Protein Shroom3	Shroom3	A0A0R4J1H8;E9Q6I3;E9QMY5;Q9QXN0;Q9QXN0-2;Q9QXN0-3;Q9QXN0-4	Mus musculus	;;;cell morphogenesis,neural tube closure,columnar/cuboidal epithelial cell development,pattern specification process,regulation of cell shape,actin cytoskeleton organization,cellular pigment accumulation,apical protein localization;;;	;;;actin binding,actin filament binding;;;	;;;cytoplasm,cytoskeleton,microtubule,adherens junction,apical plasma membrane,apical junction complex,apical part of cell;;;	tr;tr;tr;sp;sp;sp;sp	1;1;1;1;;;	1;1;1;2;;;	uniprot_mouse_proteome	>tr|A0A0R4J1H8|A0A0R4J1H8_MOUSE Protein Shroom3 OS=Mus musculus GN=Shroom3 PE=1 SV=1;>tr|E9Q6I3|E9Q6I3_MOUSE Protein Shroom3 OS=Mus musculus GN=Shroom3 PE=1 SV=1;>tr|E9QMY5|E9QMY5_MOUSE Protein Shroom3 OS=Mus musculus GN=Shroom3 PE=1 SV=1;>sp|Q9QXN0|SHRM3_MOUSE Protein Shroom3 OS=Mus musculus GN=Shroom3 PE=1 SV=2;>sp|Q9QXN0-2|SHRM3_MOUSE Isoform 2 of Protein Shroom3 OS=Mus musculus GN=Shroom3;>sp…	2	2
TRUE	Old_Decellularized / Young_Decellularized	Old_Decellularized	Young_Decellularized	10	A0A1D5RM83;E9PUA3;Q8R0S2;Q8R0S2-2	9709.9	11838.2	0.285916	0.285916	21.9184	1.21918	0	0.206305	0.114873	9	0.285853	A0A1D5RM83;E9PUA3;Q8R0S2;Q8R0S2-2	A0A1D5RM83_MOUSE;E9PUA3_MOUSE;IQEC1_MOUSE;IQEC1_MOUSE	IQ motif and SEC7 domain-containing protein 1;IQ motif and SEC7 domain-containing protein 1;IQ motif and SEC7 domain-containing protein 1;Isoform 2 of IQ motif and SEC7 domain-containing protein 1	Iqsec1	A0A1D5RM83;E9PUA3;Q8R0S2;Q8R0S2-2	Mus musculus	;;actin cytoskeleton organization,regulation of ARF protein signal transduction,positive regulation of GTPase activity;	;;ARF guanyl-nucleotide exchange factor activity,lipid binding;	;;nucleolus,cytoplasm,membrane,intracellular membrane-bounded organelle;	tr;tr;sp;sp	4;1;1;	1;1;2;	uniprot_mouse_proteome	>tr|A0A1D5RM83|A0A1D5RM83_MOUSE IQ motif and SEC7 domain-containing protein 1 OS=Mus musculus GN=Iqsec1 PE=4 SV=1;>tr|E9PUA3|E9PUA3_MOUSE IQ motif and SEC7 domain-containing protein 1 OS=Mus musculus GN=Iqsec1 PE=1 SV=1;>sp|Q8R0S2|IQEC1_MOUSE IQ motif and SEC7 domain-containing protein 1 OS=Mus musculus GN=Iqsec1 PE=1 SV=2;>sp|Q8R0S2-2|IQEC1_MOUSE Isoform 2 of IQ motif and SEC7 domain-containing …	2	2
TRUE	Old_Decellularized / Young_Decellularized	Old_Decellularized	Young_Decellularized	10	A2A6S1;Q3TB48	207468	209511	0.0141365	0.0141365	0.984686	1.00985	0	0.871702	0.33218	9	0.199954	A2A6S1;Q3TB48	A2A6S1_MOUSE;TM104_MOUSE	Transmembrane protein 104	Tmem104	A2A6S1;Q3TB48	Mus musculus	;biological_process	;molecular_function	;cellular_component,integral component of membrane	tr;sp	1	1	uniprot_mouse_proteome	>tr|A2A6S1|A2A6S1_MOUSE Transmembrane protein 104 OS=Mus musculus GN=Tmem104 PE=1 SV=1;>sp|Q3TB48|TM104_MOUSE Transmembrane protein 104 OS=Mus musculus GN=Tmem104 PE=1 SV=1	2	2
TRUE	Old_Decellularized / Young_Decellularized	Old_Decellularized	Young_Decellularized	10	B7ZMP1	61138.9	61790	0.0152831	0.0152831	1.06497	1.01065	0	0.134879	0.0835889	9	0.936417	B7ZMP1	XPP3_MOUSE	Probable Xaa-Pro aminopeptidase 3	Xpnpep3	B7ZMP1	Mus musculus	glomerular filtration,protein processing	aminopeptidase activity,manganese ion binding	mitochondrion,extracellular exosome	sp	1	1	uniprot_mouse_proteome	>sp|B7ZMP1|XPP3_MOUSE Probable Xaa-Pro aminopeptidase 3 OS=Mus musculus GN=Xpnpep3 PE=1 SV=1	2	2
TRUE	Old_Decellularized / Young_Decellularized	Old_Decellularized	Young_Decellularized	10	E0CXE7;Q5SUQ9;Q5SUQ9-2;Q5SUQ9-3	727848	663725	-0.133051	0.133051	-8.80994	0.911901	0	0.373332	0.180275	9	0.166613	E0CXE7;Q5SUQ9;Q5SUQ9-2;Q5SUQ9-3	E0CXE7_MOUSE;CTC1_MOUSE;CTC1_MOUSE;CTC1_MOUSE	CST complex subunit CTC1;CST complex subunit CTC1;Isoform 2 of CST complex subunit CTC1;Isoform 3 of CST complex subunit CTC1	Ctc1	E0CXE7;Q5SUQ9;Q5SUQ9-2;Q5SUQ9-3	Mus musculus	;telomere maintenance,cellular response to DNA damage stimulus,aging,regulation of G2/M transition of mitotic cell cycle,telomere maintenance via telomere lengthening,negative regulation of telomere maintenance via telomerase,multicellular organism growth,positive regulation of DNA replication,positive regulation of fibroblast proliferation,spleen development,thymus development,bone marrow develo…	;single-stranded DNA binding,protein binding,telomeric DNA binding,G-rich strand telomeric DNA binding;;	;nuclear chromosome, telomeric region,nucleus,CST complex;;	tr;sp;sp;sp	1;1;;	1;2;;	uniprot_mouse_proteome	>tr|E0CXE7|E0CXE7_MOUSE CST complex subunit CTC1 OS=Mus musculus GN=Ctc1 PE=1 SV=1;>sp|Q5SUQ9|CTC1_MOUSE CST complex subunit CTC1 OS=Mus musculus GN=Ctc1 PE=1 SV=2;>sp|Q5SUQ9-2|CTC1_MOUSE Isoform 2 of CST complex subunit CTC1 OS=Mus musculus GN=Ctc1;>sp|Q5SUQ9-3|CTC1_MOUSE Isoform 3 of CST complex subunit CTC1 OS=Mus musculus GN=Ctc1	2	2
TRUE	Old_Decellularized / Young_Decellularized	Old_Decellularized	Young_Decellularized	10	E0CZ81;Q8CIV8	48322.8	25857.6	-0.902114	0.902114	-46.4898	0.535102	0	0.0315721	0.0274858	9	0.426878	E0CZ81;Q8CIV8	E0CZ81_MOUSE;TBCE_MOUSE	Tubulin-specific chaperone E	Tbce	E0CZ81;Q8CIV8	Mus musculus	;microtubule cytoskeleton organization,protein folding,tubulin complex assembly,post-chaperonin tubulin folding pathway,mitotic spindle organization,axonogenesis,adult locomotory behavior,post-embryonic development,muscle atrophy,developmental growth,peripheral nervous system neuron axonogenesis	;unfolded protein binding	;cytoplasm,cytoskeleton	tr;sp	1	1	uniprot_mouse_proteome	>tr|E0CZ81|E0CZ81_MOUSE Tubulin-specific chaperone E OS=Mus musculus GN=Tbce PE=1 SV=1;>sp|Q8CIV8|TBCE_MOUSE Tubulin-specific chaperone E OS=Mus musculus GN=Tbce PE=1 SV=1	2	2
TRUE	Old_Decellularized / Young_Decellularized	Old_Decellularized	Young_Decellularized	10	E9Q8W9;G3UZF0;Q91W36	76097.9	79194	0.0575355	0.0575355	4.06865	1.04069	0	0.561084	0.243138	9	0.135784	E9Q8W9;G3UZF0;Q91W36	E9Q8W9_MOUSE;G3UZF0_MOUSE;UBP3_MOUSE	Ubiquitin carboxyl-terminal hydrolase 3	Usp3	E9Q8W9;G3UZF0;Q91W36	Mus musculus	;;negative regulation of transcription from RNA polymerase II promoter,mitotic cell cycle,DNA repair,regulation of transcription, DNA-templated,ubiquitin-dependent protein catabolic process,histone deubiquitination,regulation of protein stability	;;core promoter sequence-specific DNA binding,chromatin binding,thiol-dependent ubiquitin-specific protease activity,zinc ion binding,histone binding	;;nuclear chromatin,nucleus,nucleoplasm,Flemming body	tr;tr;sp	1;1;2	1	uniprot_mouse_proteome	>tr|E9Q8W9|E9Q8W9_MOUSE Ubiquitin carboxyl-terminal hydrolase 3 OS=Mus musculus GN=Usp3 PE=1 SV=1;>tr|G3UZF0|G3UZF0_MOUSE Ubiquitin carboxyl-terminal hydrolase 3 OS=Mus musculus GN=Usp3 PE=1 SV=1;>sp|Q91W36|UBP3_MOUSE Ubiquitin carboxyl-terminal hydrolase 3 OS=Mus musculus GN=Usp3 PE=2 SV=1	2	2
TRUE	Old_Decellularized / Young_Decellularized	Old_Decellularized	Young_Decellularized	35	E9Q9C5;P63082	325607	360063	0.145119	0.145119	10.5822	1.10582	0	0.0556078	0.0426327	34	0.252972	E9Q9C5;P63082	E9Q9C5_MOUSE;VATL_MOUSE	V-type proton ATPase proteolipid subunit (Fragment);V-type proton ATPase 16 kDa proteolipid subunit	Atp6v0c	E9Q9C5;P63082	Mus musculus	;vacuolar acidification,lysosomal lumen acidification,ATP hydrolysis coupled proton transport,positive regulation of Wnt signaling pathway	;protein binding,hydrogen-exporting ATPase activity, phosphorylative mechanism,ubiquitin protein ligase binding,proton-transporting ATPase activity, rotational mechanism	;vacuolar proton-transporting V-type ATPase, V0 domain,lysosomal membrane,focal adhesion,integral component of membrane,vacuolar proton-transporting V-type ATPase complex,extracellular exosome	tr;sp	1	1	uniprot_mouse_proteome	>tr|E9Q9C5|E9Q9C5_MOUSE V-type proton ATPase proteolipid subunit (Fragment) OS=Mus musculus GN=Atp6v0c PE=1 SV=1;>sp|P63082|VATL_MOUSE V-type proton ATPase 16 kDa proteolipid subunit OS=Mus musculus GN=Atp6v0c PE=1 SV=1	2	7
TRUE	Old_Decellularized / Young_Decellularized	Old_Decellularized	Young_Decellularized	15	E9Q9P8;O54909;Q8K5C8	48475.2	48957.1	0.0142719	0.0142719	0.994162	1.00994	0	0.876025	0.333123	14	0.345249	E9Q9P8;O54909;Q8K5C8	E9Q9P8_MOUSE;O54909_MOUSE;Q8K5C8_MOUSE	Protein Gm28046;Cis-retinol androgen dehydrogenase 1;Cis-retinol/androgen dehydrogenase type 3	Gm28046;Rdh16;Rdh9	E9Q9P8;O54909;Q8K5C8	Mus musculus	oxidation-reduction process;9-cis-retinoic acid biosynthetic process,oxidation-reduction process;9-cis-retinoic acid biosynthetic process,oxidation-reduction process	oxidoreductase activity;retinol dehydrogenase activity,protein homodimerization activity;retinol dehydrogenase activity	;endoplasmic reticulum lumen,integral component of organelle membrane;cellular_component	tr	3;1;2	1	uniprot_mouse_proteome	>tr|E9Q9P8|E9Q9P8_MOUSE Protein Gm28046 OS=Mus musculus GN=Gm28046 PE=3 SV=1;>tr|O54909|O54909_MOUSE Cis-retinol androgen dehydrogenase 1 OS=Mus musculus GN=Rdh16 PE=1 SV=1;>tr|Q8K5C8|Q8K5C8_MOUSE Cis-retinol/androgen dehydrogenase type 3 OS=Mus musculus GN=Rdh9 PE=2 SV=1	2	3
TRUE	Old_Decellularized / Young_Decellularized	Old_Decellularized	Young_Decellularized	10	E9Q9Y2;F7C134;Q5RIM6;Q60974;Q60974-2;Q8CHB6	22378.7	22493.2	0.00736245	0.00736245	0.511631	1.00512	0	0.98405	0.361384	9	0.180254	E9Q9Y2;F7C134;Q5RIM6;Q60974;Q60974-2;Q8CHB6	E9Q9Y2_MOUSE;F7C134_MOUSE;Q5RIM6_MOUSE;NCOR1_MOUSE;NCOR1_MOUSE;Q8CHB6_MOUSE	Nuclear receptor corepressor 1;Nuclear receptor corepressor 1 (Fragment);Nuclear receptor co-repressor 1, isoform CRA_a;Nuclear receptor corepressor 1;Isoform 2 of Nuclear receptor corepressor 1;MKIAA1047 protein (Fragment)	Ncor1	E9Q9Y2;F7C134;Q5RIM6;Q60974;Q60974-2;Q8CHB6	Mus musculus	;;;negative regulation of transcription from RNA polymerase II promoter,regulation of thyroid hormone mediated signaling pathway,CD4-positive, CD25-positive, alpha-beta regulatory T cell differentiation,transcription, DNA-templated,regulation of transcription from RNA polymerase II promoter,circadian rhythm,negative regulation of phosphatidylinositol 3-kinase signaling,chromatin modification,thal…	;;;RNA polymerase II activating transcription factor binding,DNA binding,transcription factor activity, sequence-specific DNA binding,transcription corepressor activity,protein binding,ligand-dependent nuclear receptor binding,protein domain specific binding,histone deacetylase regulator activity,nuclear hormone receptor binding,histone deacetylase binding,retinoic acid receptor binding,sequence-…	;;;nuclear chromatin,nucleus,nucleoplasm,transcription factor complex,cytoplasm,cytosol,spindle microtubule,membrane,Sin3 complex,transcriptional repressor complex,histone deacetylase complex;;	tr;tr;tr;sp;sp;tr	1;1;1;1;;1	1;1;1;1;;1	uniprot_mouse_proteome	>tr|E9Q9Y2|E9Q9Y2_MOUSE Nuclear receptor corepressor 1 OS=Mus musculus GN=Ncor1 PE=1 SV=1;>tr|F7C134|F7C134_MOUSE Nuclear receptor corepressor 1 (Fragment) OS=Mus musculus GN=Ncor1 PE=1 SV=1;>tr|Q5RIM6|Q5RIM6_MOUSE Nuclear receptor co-repressor 1, isoform CRA_a OS=Mus musculus GN=Ncor1 PE=1 SV=1;>sp|Q60974|NCOR1_MOUSE Nuclear receptor corepressor 1 OS=Mus musculus GN=Ncor1 PE=1 SV=1;>sp|Q60974-2|…	2	2
TRUE	Old_Decellularized / Young_Decellularized	Old_Decellularized	Young_Decellularized	10	F6SFF5;Q8K1Z0	32518.1	42731.1	0.394043	0.394043	31.407	1.31407	0	0.01457	0.0152884	9	0.160397	F6SFF5;Q8K1Z0	F6SFF5_MOUSE;COQ9_MOUSE	Ubiquinone biosynthesis protein COQ9, mitochondrial (Fragment);Ubiquinone biosynthesis protein COQ9, mitochondrial	Coq9	F6SFF5;Q8K1Z0	Mus musculus	;mitochondrial electron transport, NADH to ubiquinone,ubiquinone biosynthetic process	;lipid binding,protein homodimerization activity	;mitochondrion,mitochondrial inner membrane	tr;sp	1	2;1	uniprot_mouse_proteome	>tr|F6SFF5|F6SFF5_MOUSE Ubiquinone biosynthesis protein COQ9, mitochondrial (Fragment) OS=Mus musculus GN=Coq9 PE=1 SV=2;>sp|Q8K1Z0|COQ9_MOUSE Ubiquinone biosynthesis protein COQ9, mitochondrial OS=Mus musculus GN=Coq9 PE=1 SV=1	2	2
TRUE	Old_Decellularized / Young_Decellularized	Old_Decellularized	Young_Decellularized	10	P16330;P16330-2	107129	129921	0.278289	0.278289	21.2755	1.21276	0	0.00932302	0.0109511	9	0.0782614	P16330;P16330-2	CN37_MOUSE	2',3'-cyclic-nucleotide 3'-phosphodiesterase;Isoform CNPI of 2',3'-cyclic-nucleotide 3'-phosphodiesterase	Cnp	P16330;P16330-2	Mus musculus	microtubule cytoskeleton organization,axonogenesis,aging,adult locomotory behavior,cyclic nucleotide catabolic process,response to toxic substance,substantia nigra development,forebrain development,response to lipopolysaccharide,regulation of mitochondrial membrane permeability,oligodendrocyte differentiation;	RNA binding,2',3'-cyclic-nucleotide 3'-phosphodiesterase activity,cyclic nucleotide binding;	extracellular space,cytoplasm,mitochondrial outer membrane,mitochondrial inner membrane,microtubule,plasma membrane,microvillus,membrane,pseudopodium,myelin sheath abaxonal region,myelin sheath adaxonal region,melanosome,myelin sheath,perinuclear region of cytoplasm,extracellular exosome;	sp	1;	3;	uniprot_mouse_proteome	>sp|P16330|CN37_MOUSE 2',3'-cyclic-nucleotide 3'-phosphodiesterase OS=Mus musculus GN=Cnp PE=1 SV=3;>sp|P16330-2|CN37_MOUSE Isoform CNPI of 2',3'-cyclic-nucleotide 3'-phosphodiesterase OS=Mus musculus GN=Cnp	2	2
TRUE	Old_Decellularized / Young_Decellularized	Old_Decellularized	Young_Decellularized	10	P46061	39758.5	32703.6	-0.281812	0.281812	-17.7443	0.822557	0	0.232001	0.125031	9	0.145039	P46061	RAGP1_MOUSE	Ran GTPase-activating protein 1	Rangap1	P46061	Mus musculus	signal transduction,positive regulation of GTPase activity,negative regulation of protein export from nucleus,response to axon injury,cellular response to vasopressin	RNA binding,GTPase activator activity,Ran GTPase binding,ubiquitin protein ligase binding,cadherin binding	condensed chromosome kinetochore,nuclear envelope,cytoplasm,cytosol,aggresome,dendrite,nuclear membrane,intracellular membrane-bounded organelle,nuclear pore cytoplasmic filaments,perinuclear region of cytoplasm,mitotic spindle,axon cytoplasm,cytoplasmic periphery of the nuclear pore complex,kinetochore	sp	1	2	uniprot_mouse_proteome	>sp|P46061|RAGP1_MOUSE Ran GTPase-activating protein 1 OS=Mus musculus GN=Rangap1 PE=1 SV=2	2	2
TRUE	Old_Decellularized / Young_Decellularized	Old_Decellularized	Young_Decellularized	10	Q08288	35919.5	35358.8	-0.0226987	0.0226987	-1.56104	0.98439	0	0.968428	0.357589	9	0.136648	Q08288	LYAR_MOUSE	Cell growth-regulating nucleolar protein	Lyar	Q08288	Mus musculus	biological_process	RNA binding,metal ion binding	nucleus,nucleolus	sp	1	2	uniprot_mouse_proteome	>sp|Q08288|LYAR_MOUSE Cell growth-regulating nucleolar protein OS=Mus musculus GN=Lyar PE=1 SV=2	2	2
TRUE	Old_Decellularized / Young_Decellularized	Old_Decellularized	Young_Decellularized	10	Q3TLK9;Q60809	35420.7	36439.8	0.0409218	0.0409218	2.87709	1.02877	0	0.981355	0.360766	9	0.107819	Q3TLK9;Q60809	Q3TLK9_MOUSE;CNOT7_MOUSE	CCR4-NOT transcription complex subunit 7	Cnot7	Q3TLK9;Q60809	Mus musculus	;negative regulation of transcription from RNA polymerase II promoter,nuclear-transcribed mRNA poly(A) tail shortening,deadenylation-dependent decapping of nuclear-transcribed mRNA,transcription, DNA-templated,positive regulation of cell proliferation,negative regulation of cell proliferation,negative regulation of gene expression,negative regulation of translation,gene silencing by RNA,cytoplasm…	;3'-5'-exoribonuclease activity,transcriptional repressor activity, RNA polymerase II transcription factor binding,RNA binding,exoribonuclease activity,poly(A)-specific ribonuclease activity,protein binding,transcription factor binding,metal ion binding	;cytoplasmic mRNA processing body,nucleus,cytoplasm,membrane,nuclear body,nuclear speck,CCR4-NOT complex,CCR4-NOT core complex,host cell PML body	tr;sp	1	1	uniprot_mouse_proteome	>tr|Q3TLK9|Q3TLK9_MOUSE CCR4-NOT transcription complex subunit 7 OS=Mus musculus GN=Cnot7 PE=1 SV=1;>sp|Q60809|CNOT7_MOUSE CCR4-NOT transcription complex subunit 7 OS=Mus musculus GN=Cnot7 PE=1 SV=1	2	2
TRUE	Old_Decellularized / Young_Decellularized	Old_Decellularized	Young_Decellularized	10	Q5SW15;Q9CQG2	35506.2	24214.3	-0.552211	0.552211	-31.8026	0.681974	0	0.330285	0.164457	9	0.320004	Q5SW15;Q9CQG2	Q5SW15_MOUSE;MET16_MOUSE	Methyltransferase-like protein;Methyltransferase-like protein 16	Mettl16	Q5SW15;Q9CQG2	Mus musculus	;mRNA processing,RNA splicing,posttranscriptional regulation of gene expression,regulation of mRNA splicing, via spliceosome,rRNA base methylation,mRNA methylation,Requires Ontology	;RNA binding,mRNA (2'-O-methyladenosine-N6-)-methyltransferase activity,U6 snRNA 3'-end binding,RNA stem-loop binding,23S rRNA (adenine(1618)-N(6))-methyltransferase activity,Requires Ontology	;nucleus	tr;sp	1	1	uniprot_mouse_proteome	>tr|Q5SW15|Q5SW15_MOUSE Methyltransferase-like protein OS=Mus musculus GN=Mettl16 PE=1 SV=1;>sp|Q9CQG2|MET16_MOUSE Methyltransferase-like protein 16 OS=Mus musculus GN=Mettl16 PE=1 SV=1	2	2
TRUE	Old_Decellularized / Young_Decellularized	Old_Decellularized	Young_Decellularized	10	Q5XF89;Q5XF89-2	9051.97	14928.9	0.721808	0.721808	64.9248	1.64925	0	0.0145085	0.0152489	9	0.265395	Q5XF89;Q5XF89-2	AT133_MOUSE	Probable cation-transporting ATPase 13A3;Isoform 2 of Probable cation-transporting ATPase 13A3	Atp13a3	Q5XF89;Q5XF89-2	Mus musculus	cellular calcium ion homeostasis,calcium ion transmembrane transport,Requires Ontology;	calcium-transporting ATPase activity,ATP binding,metal ion binding;	integral component of plasma membrane,membrane,intracellular membrane-bounded organelle;	sp	1;	1;	uniprot_mouse_proteome	>sp|Q5XF89|AT133_MOUSE Probable cation-transporting ATPase 13A3 OS=Mus musculus GN=Atp13a3 PE=1 SV=1;>sp|Q5XF89-2|AT133_MOUSE Isoform 2 of Probable cation-transporting ATPase 13A3 OS=Mus musculus GN=Atp13a3	2	2
TRUE	Old_Decellularized / Young_Decellularized	Old_Decellularized	Young_Decellularized	10	Q6A028	62082.2	51818.1	-0.260723	0.260723	-16.5331	0.834669	0	0.084525	0.0586248	9	0.123179	Q6A028	SWP70_MOUSE	Switch-associated protein 70	Swap70	Q6A028	Mus musculus	positive regulation of cytosolic calcium ion concentration,regulation of actin polymerization or depolymerization,somatic cell DNA recombination,negative regulation of actin filament depolymerization,positive regulation of actin filament bundle assembly,regulation of protein localization,negative regulation of cell-cell adhesion mediated by integrin,isotype switching,actin filament bundle assembl…	DNA binding,protein binding,ATP binding,cadherin binding	nucleus,cytoplasm,cytoskeleton,plasma membrane,lamellipodium	sp	1	2	uniprot_mouse_proteome	>sp|Q6A028|SWP70_MOUSE Switch-associated protein 70 OS=Mus musculus GN=Swap70 PE=1 SV=2	2	2
TRUE	Old_Decellularized / Young_Decellularized	Old_Decellularized	Young_Decellularized	10	Q6ZQ73	20465.8	16749.9	-0.289061	0.289061	-18.1566	0.818434	0	0.0595018	0.0449892	9	0.358185	Q6ZQ73	CAND2_MOUSE	Cullin-associated NEDD8-dissociated protein 2	Cand2	Q6ZQ73	Mus musculus	SCF complex assembly,protein ubiquitination	protein binding,TBP-class protein binding	intracellular,nucleus	sp	1	2	uniprot_mouse_proteome	>sp|Q6ZQ73|CAND2_MOUSE Cullin-associated NEDD8-dissociated protein 2 OS=Mus musculus GN=Cand2 PE=1 SV=2	2	2
TRUE	Old_Decellularized / Young_Decellularized	Old_Decellularized	Young_Decellularized	10	Q78YY6	180079	176722	-0.0271472	0.0271472	-1.86411	0.981359	0	0.78557	0.308826	9	0.155601	Q78YY6	DJC15_MOUSE	DnaJ homolog subfamily C member 15	Dnajc15	Q78YY6	Mus musculus	cellular response to starvation,protein transport,regulation of lipid metabolic process,negative regulation of protein complex assembly,negative regulation of mitochondrial electron transport, NADH to ubiquinone	protein binding	mitochondrion,mitochondrial inner membrane,integral component of membrane	sp	1	1	uniprot_mouse_proteome	>sp|Q78YY6|DJC15_MOUSE DnaJ homolog subfamily C member 15 OS=Mus musculus GN=Dnajc15 PE=1 SV=1	2	2
TRUE	Old_Decellularized / Young_Decellularized	Old_Decellularized	Young_Decellularized	10	Q7TSZ8	114757	90050.6	-0.349778	0.349778	-21.5295	0.784705	0	0.00668414	0.00835371	9	0.084407	Q7TSZ8	NACC1_MOUSE	Nucleus accumbens-associated protein 1	Nacc1	Q7TSZ8	Mus musculus	transcription, DNA-templated,positive regulation of cell proliferation,negative regulation of transcription, DNA-templated,protein homooligomerization	protein binding	nucleus,nucleoplasm,cytoplasm,nuclear body,cell junction,intracellular membrane-bounded organelle	sp	1	1	uniprot_mouse_proteome	>sp|Q7TSZ8|NACC1_MOUSE Nucleus accumbens-associated protein 1 OS=Mus musculus GN=Nacc1 PE=1 SV=1	2	2
TRUE	Old_Decellularized / Young_Decellularized	Old_Decellularized	Young_Decellularized	10	Q7TT37	52941.5	40402.1	-0.389968	0.389968	-23.6854	0.763146	0	0.0463636	0.0368736	9	0.164971	Q7TT37	ELP1_MOUSE	Elongator complex protein 1	Ikbkap	Q7TT37	Mus musculus	tRNA wobble uridine modification,transcription, DNA-templated,regulation of transcription from RNA polymerase II promoter,positive regulation of cell migration,regulation of protein kinase activity	phosphorylase kinase regulator activity,RNA polymerase II core binding	histone acetyltransferase complex,nucleolus,cytoplasm,cytosol,transcription elongation factor complex,Elongator holoenzyme complex	sp	1	2	uniprot_mouse_proteome	>sp|Q7TT37|ELP1_MOUSE Elongator complex protein 1 OS=Mus musculus GN=Ikbkap PE=1 SV=2	2	2
TRUE	Old_Decellularized / Young_Decellularized	Old_Decellularized	Young_Decellularized	10	Q8BHS3	147052	122367	-0.265109	0.265109	-16.7864	0.832136	0	0.381172	0.182768	9	0.145155	Q8BHS3	RBM22_MOUSE	Pre-mRNA-splicing factor RBM22	Rbm22	Q8BHS3	Mus musculus	protein import into nucleus, translocation,spliceosomal snRNP assembly,positive regulation of RNA splicing,cellular response to drug,mRNA cis splicing, via spliceosome,positive regulation of intracellular protein transport	RNA binding,nucleocytoplasmic transporter activity,U6 snRNA binding,pre-mRNA binding,metal ion binding,calcium-dependent protein binding	Prp19 complex,nucleus,cytoplasm,U2-type catalytic step 1 spliceosome,U2-type catalytic step 2 spliceosome,catalytic step 2 spliceosome	sp	1	1	uniprot_mouse_proteome	>sp|Q8BHS3|RBM22_MOUSE Pre-mRNA-splicing factor RBM22 OS=Mus musculus GN=Rbm22 PE=1 SV=1	2	2
TRUE	Old_Decellularized / Young_Decellularized	Old_Decellularized	Young_Decellularized	10	Q8QZV7	48732.6	37861.5	-0.364157	0.364157	-22.3077	0.776923	0	0.125469	0.0789926	9	0.181028	Q8QZV7	ASUN_MOUSE	Protein asunder homolog	Asun	Q8QZV7	Mus musculus	mitotic spindle organization,regulation of mitotic cell cycle,flagellated sperm motility,cell division,centrosome localization,regulation of fertilization,protein localization to nuclear envelope	molecular_function	nucleus,cytoplasm	sp	1	2	uniprot_mouse_proteome	>sp|Q8QZV7|ASUN_MOUSE Protein asunder homolog OS=Mus musculus GN=Asun PE=1 SV=2	2	2
TRUE	Old_Decellularized / Young_Decellularized	Old_Decellularized	Young_Decellularized	10	Q9CQ19	162532	212224	0.384864	0.384864	30.5736	1.30574	0	0.32251	0.161482	9	0.419684	Q9CQ19	MYL9_MOUSE	Myosin regulatory light polypeptide 9	Myl9	Q9CQ19	Mus musculus	platelet aggregation	calcium ion binding,myosin heavy chain binding	stress fiber,myosin II complex,Z disc	sp	1	3	uniprot_mouse_proteome	>sp|Q9CQ19|MYL9_MOUSE Myosin regulatory light polypeptide 9 OS=Mus musculus GN=Myl9 PE=1 SV=3	2	2
TRUE	Old_Decellularized / Young_Decellularized	Old_Decellularized	Young_Decellularized	10	Q9CYL5	329484	212939	-0.629767	0.629767	-35.3719	0.646281	0	0.0606838	0.0456409	9	0.262136	Q9CYL5	GAPR1_MOUSE	Golgi-associated plant pathogenesis-related protein 1	Glipr2	Q9CYL5	Mus musculus	positive regulation of epithelial cell migration,positive regulation of epithelial to mesenchymal transition,positive regulation of ERK1 and ERK2 cascade	protein homodimerization activity	Golgi membrane,extracellular exosome	sp	1	3	uniprot_mouse_proteome	>sp|Q9CYL5|GAPR1_MOUSE Golgi-associated plant pathogenesis-related protein 1 OS=Mus musculus GN=Glipr2 PE=1 SV=3	2	2
TRUE	Old_Decellularized / Young_Decellularized	Old_Decellularized	Young_Decellularized	10	Q9CZP5	13111.3	19888.1	0.601094	0.601094	51.6866	1.51687	0	0.0516322	0.0402776	9	0.988082	Q9CZP5	BCS1_MOUSE	Mitochondrial chaperone BCS1	Bcs1l	Q9CZP5	Mus musculus	mitochondrion organization,mitochondrial respiratory chain complex I assembly,mitochondrial respiratory chain complex IV assembly,mitochondrial respiratory chain complex III assembly	ATP binding	mitochondrion,mitochondrial inner membrane,integral component of membrane	sp	1	1	uniprot_mouse_proteome	>sp|Q9CZP5|BCS1_MOUSE Mitochondrial chaperone BCS1 OS=Mus musculus GN=Bcs1l PE=1 SV=1	2	2
TRUE	Old_Decellularized / Young_Decellularized	Old_Decellularized	Young_Decellularized	10	Q9D8B6	217261	172932	-0.329226	0.329226	-20.4037	0.795963	0	0.821689	0.319446	9	0.336073	Q9D8B6	F210B_MOUSE	Protein FAM210B	Fam210b	Q9D8B6	Mus musculus	positive regulation of erythrocyte differentiation,cellular response to estradiol stimulus	molecular_function	mitochondrial outer membrane,integral component of membrane,intrinsic component of membrane	sp	1	3	uniprot_mouse_proteome	>sp|Q9D8B6|F210B_MOUSE Protein FAM210B OS=Mus musculus GN=Fam210b PE=1 SV=3	2	2
TRUE	Old_Decellularized / Young_Decellularized	Old_Decellularized	Young_Decellularized	10	Q9R0E1	144527	120320	-0.264469	0.264469	-16.7495	0.832505	0	0.0279427	0.0251079	9	0.145112	Q9R0E1	PLOD3_MOUSE	Procollagen-lysine,2-oxoglutarate 5-dioxygenase 3	Plod3	Q9R0E1	Mus musculus	in utero embryonic development,endothelial cell morphogenesis,protein O-linked glycosylation,protein localization,peptidyl-lysine hydroxylation,neural tube development,collagen fibril organization,cellular response to hormone stimulus,collagen metabolic process,vasodilation,hydroxylysine biosynthetic process,epidermis morphogenesis,oxidation-reduction process,lung morphogenesis,basement membrane …	iron ion binding,procollagen-lysine 5-dioxygenase activity,L-ascorbic acid binding,procollagen glucosyltransferase activity	endoplasmic reticulum,Golgi apparatus,trans-Golgi network,rough endoplasmic reticulum membrane,extracellular matrix,extracellular exosome	sp	1	1	uniprot_mouse_proteome	>sp|Q9R0E1|PLOD3_MOUSE Procollagen-lysine,2-oxoglutarate 5-dioxygenase 3 OS=Mus musculus GN=Plod3 PE=1 SV=1	2	2
TRUE	Old_Decellularized / Young_Decellularized	Old_Decellularized	Young_Decellularized	10	Q9Z2E1	83728.7	87483.3	0.0632859	0.0632859	4.48428	1.04484	0	0.338338	0.167524	9	0.227814	Q9Z2E1	MBD2_MOUSE	Methyl-CpG-binding domain protein 2	Mbd2	Q9Z2E1	Mus musculus	negative regulation of transcription from RNA polymerase II promoter,methylation-dependent chromatin silencing,transcription, DNA-templated,heart development,aging,response to mechanical stimulus,positive regulation of Wnt signaling pathway,response to nutrient levels,response to estradiol,positive regulation of chromatin binding,regulation of cell proliferation,maternal behavior,ATP-dependent ch…	DNA binding,chromatin binding,mRNA binding,protein binding,methyl-CpG binding,protein domain specific binding,siRNA binding,C2H2 zinc finger domain binding,RNA polymerase II core promoter proximal region sequence-specific DNA binding,RNA polymerase II distal enhancer sequence-specific DNA binding,nucleosomal DNA binding	histone deacetylase complex,chromatin,nuclear chromatin,heterochromatin,nucleus,nucleoplasm,cytoplasm,cytosol,protein complex,nucleolus	sp	2	2	uniprot_mouse_proteome	>sp|Q9Z2E1|MBD2_MOUSE Methyl-CpG-binding domain protein 2 OS=Mus musculus GN=Mbd2 PE=2 SV=2	2	2
TRUE	Old_Decellularized / Young_Decellularized	Old_Decellularized	Young_Decellularized	15	Q9Z315	35439.3	37749.1	0.0910913	0.0910913	6.51756	1.06518	0	0.27265	0.141949	14	0.189253	Q9Z315	SNUT1_MOUSE	U4/U6.U5 tri-snRNP-associated protein 1	Sart1	Q9Z315	Mus musculus	spliceosomal snRNP assembly,maturation of 5S rRNA,mRNA cis splicing, via spliceosome,positive regulation of cytotoxic T cell differentiation	RNA binding	nucleoplasm,Golgi apparatus,Cajal body,nuclear speck,U4/U6 x U5 tri-snRNP complex,catalytic step 2 spliceosome	sp	1	1	uniprot_mouse_proteome	>sp|Q9Z315|SNUT1_MOUSE U4/U6.U5 tri-snRNP-associated protein 1 OS=Mus musculus GN=Sart1 PE=1 SV=1	2	3
TRUE	Old_Decellularized / Young_Decellularized	Old_Decellularized	Young_Decellularized	10	A2A7Q5;A6PW84;Q3V1T4;Q3V1T4-3	62670.5	37740.1	-0.731687	0.731687	-39.78	0.6022	0	0.0101273	0.0116653	9	0.232103	A2A7Q5;A6PW84;Q3V1T4;Q3V1T4-3	A2A7Q5_MOUSE;A6PW84_MOUSE;P3H1_MOUSE;P3H1_MOUSE	Prolyl 3-hydroxylase 1;Prolyl 3-hydroxylase 1;Prolyl 3-hydroxylase 1;Isoform 3 of Prolyl 3-hydroxylase 1	P3h1	A2A7Q5;A6PW84;Q3V1T4;Q3V1T4-3	Mus musculus	;;protein folding,cell growth,protein hydroxylation,peptidyl-proline hydroxylation,collagen fibril organization,regulation of ossification,collagen metabolic process,regulation of protein secretion,protein stabilization,oxidation-reduction process,bone development,negative regulation of post-translational protein modification;	;;iron ion binding,procollagen-proline 3-dioxygenase activity,L-ascorbic acid binding;	;;basement membrane,nucleus,cytoplasm,endoplasmic reticulum,plasma membrane,membrane,extracellular exosome;	tr;tr;sp;sp	1;1;1;	1;1;2;	uniprot_mouse_proteome	>tr|A2A7Q5|A2A7Q5_MOUSE Prolyl 3-hydroxylase 1 OS=Mus musculus GN=P3h1 PE=1 SV=1;>tr|A6PW84|A6PW84_MOUSE Prolyl 3-hydroxylase 1 OS=Mus musculus GN=P3h1 PE=1 SV=1;>sp|Q3V1T4|P3H1_MOUSE Prolyl 3-hydroxylase 1 OS=Mus musculus GN=P3h1 PE=1 SV=2;>sp|Q3V1T4-3|P3H1_MOUSE Isoform 3 of Prolyl 3-hydroxylase 1 OS=Mus musculus GN=P3h1	2	2
TRUE	Old_Decellularized / Young_Decellularized	Old_Decellularized	Young_Decellularized	10	B1AR17;E9Q614;F7C528	32751.5	26031.7	-0.331293	0.331293	-20.5176	0.794824	0	0.943305	0.351246	9	0.234534	B1AR17;E9Q614;F7C528	B1AR17_MOUSE;E9Q614_MOUSE;F7C528_MOUSE	Protein Chd3;Protein Chd3;Protein Chd3 (Fragment)	Chd3	B1AR17;E9Q614;F7C528	Mus musculus	chromatin assembly or disassembly,spindle organization,centrosome cycle;;	RNA binding,protein binding,ATP binding,metal ion binding;;	nucleus,nucleoplasm,nucleolus,cytoplasm,centrosome,microtubule organizing center,NuRD complex;;	tr	1	1	uniprot_mouse_proteome	>tr|B1AR17|B1AR17_MOUSE Protein Chd3 OS=Mus musculus GN=Chd3 PE=1 SV=1;>tr|E9Q614|E9Q614_MOUSE Protein Chd3 OS=Mus musculus GN=Chd3 PE=1 SV=1;>tr|F7C528|F7C528_MOUSE Protein Chd3 (Fragment) OS=Mus musculus GN=Chd3 PE=1 SV=1	2	2
TRUE	Old_Decellularized / Young_Decellularized	Old_Decellularized	Young_Decellularized	10	D3YVC9;Q8C0K5	113543	113774	0.00293491	0.00293491	0.20364	1.00204	0	0.696208	0.283655	9	0.0924253	D3YVC9;Q8C0K5	D3YVC9_MOUSE;GDC_MOUSE	Graves disease carrier protein homolog (Fragment);Graves disease carrier protein homolog	Slc25a16	D3YVC9;Q8C0K5	Mus musculus	;mitochondrial transport,transmembrane transport	;transmembrane transporter activity	;mitochondrion,mitochondrial inner membrane,integral component of membrane	tr;sp	1	1	uniprot_mouse_proteome	>tr|D3YVC9|D3YVC9_MOUSE Graves disease carrier protein homolog (Fragment) OS=Mus musculus GN=Slc25a16 PE=1 SV=1;>sp|Q8C0K5|GDC_MOUSE Graves disease carrier protein homolog OS=Mus musculus GN=Slc25a16 PE=1 SV=1	2	2
TRUE	Old_Decellularized / Young_Decellularized	Old_Decellularized	Young_Decellularized	10	D6RG69;F6WM75;Q9D162;Q9D162-2;Q9D162-3	42309.9	52245.6	0.304314	0.304314	23.4831	1.23483	0	0.0356482	0.0301025	9	0.142057	D6RG69;F6WM75;Q9D162;Q9D162-2;Q9D162-3	D6RG69_MOUSE;F6WM75_MOUSE;CC167_MOUSE;CC167_MOUSE;CC167_MOUSE	Coiled-coil domain-containing protein 167;Coiled-coil domain-containing protein 167 (Fragment);Coiled-coil domain-containing protein 167;Isoform 2 of Coiled-coil domain-containing protein 167;Isoform 3 of Coiled-coil domain-containing protein 167	Ccdc167	D6RG69;F6WM75;Q9D162;Q9D162-2;Q9D162-3	Mus musculus	;;biological_process;;	;;molecular_function;;	;;cellular_component,integral component of membrane;;	tr;tr;sp;sp;sp	1;1;1;;	1;1;2;;	uniprot_mouse_proteome	>tr|D6RG69|D6RG69_MOUSE Coiled-coil domain-containing protein 167 OS=Mus musculus GN=Ccdc167 PE=1 SV=1;>tr|F6WM75|F6WM75_MOUSE Coiled-coil domain-containing protein 167 (Fragment) OS=Mus musculus GN=Ccdc167 PE=1 SV=1;>sp|Q9D162|CC167_MOUSE Coiled-coil domain-containing protein 167 OS=Mus musculus GN=Ccdc167 PE=1 SV=2;>sp|Q9D162-2|CC167_MOUSE Isoform 2 of Coiled-coil domain-containing protein 167 …	2	2
TRUE	Old_Decellularized / Young_Decellularized	Old_Decellularized	Young_Decellularized	10	E9PYM7;E9PZ88;F6TFL1;F8WIE1;Q91W89	5947.44	15108	1.34497	1.34497	154.025	2.54025	0	0.0234942	0.0220557	9	1.05669	E9PYM7;E9PZ88;F6TFL1;F8WIE1;Q91W89	E9PYM7_MOUSE;E9PZ88_MOUSE;F6TFL1_MOUSE;F8WIE1_MOUSE;MA2C1_MOUSE	Alpha-mannosidase (Fragment);Alpha-mannosidase;Alpha-mannosidase 2C1 (Fragment);Alpha-mannosidase;Alpha-mannosidase 2C1	Man2c1	E9PYM7;E9PZ88;F6TFL1;F8WIE1;Q91W89	Mus musculus	;;;;mannose metabolic process,protein deglycosylation	;;;;alpha-mannosidase activity,carbohydrate binding,metal ion binding	;;;;nucleoplasm,vacuole	tr;tr;tr;tr;sp	1	1	uniprot_mouse_proteome	>tr|E9PYM7|E9PYM7_MOUSE Alpha-mannosidase (Fragment) OS=Mus musculus GN=Man2c1 PE=1 SV=1;>tr|E9PZ88|E9PZ88_MOUSE Alpha-mannosidase OS=Mus musculus GN=Man2c1 PE=1 SV=1;>tr|F6TFL1|F6TFL1_MOUSE Alpha-mannosidase 2C1 (Fragment) OS=Mus musculus GN=Man2c1 PE=1 SV=1;>tr|F8WIE1|F8WIE1_MOUSE Alpha-mannosidase OS=Mus musculus GN=Man2c1 PE=1 SV=1;>sp|Q91W89|MA2C1_MOUSE Alpha-mannosidase 2C1 OS=Mus musculus …	2	2
TRUE	Old_Decellularized / Young_Decellularized	Old_Decellularized	Young_Decellularized	10	G5E8R2	103975	162592	0.645026	0.645026	56.3768	1.56377	0	0.016447	0.0168608	9	0.304909	G5E8R2	G5E8R2_MOUSE	Tropomyosin 1, alpha, isoform CRA_k	Tpm1	G5E8R2	Mus musculus				tr	1	1	uniprot_mouse_proteome	>tr|G5E8R2|G5E8R2_MOUSE Tropomyosin 1, alpha, isoform CRA_k OS=Mus musculus GN=Tpm1 PE=1 SV=1	2	2
TRUE	Old_Decellularized / Young_Decellularized	Old_Decellularized	Young_Decellularized	10	J3QNU1;Q4FCQ7;Q9Z2A5;Q9Z2A5-2	92259.4	78477.5	-0.233417	0.233417	-14.9382	0.850618	0	0.0667346	0.0490281	9	0.1313	J3QNU1;Q4FCQ7;Q9Z2A5;Q9Z2A5-2	J3QNU1_MOUSE;Q4FCQ7_MOUSE;ATE1_MOUSE;ATE1_MOUSE	Arginyl-tRNA--protein transferase 1;Arginyl-tRNA--protein transferase 1;Arginyl-tRNA--protein transferase 1;Isoform ATE1-2 of Arginyl-tRNA--protein transferase 1	Ate1	J3QNU1;Q4FCQ7;Q9Z2A5;Q9Z2A5-2	Mus musculus	;;proteasomal protein catabolic process,protein arginylation;	;;arginyltransferase activity,protein binding;	;;nucleus,cytoplasm;	tr;tr;sp;sp	1;1;1;	1;1;2;	uniprot_mouse_proteome	>tr|J3QNU1|J3QNU1_MOUSE Arginyl-tRNA--protein transferase 1 OS=Mus musculus GN=Ate1 PE=1 SV=1;>tr|Q4FCQ7|Q4FCQ7_MOUSE Arginyl-tRNA--protein transferase 1 OS=Mus musculus GN=Ate1 PE=1 SV=1;>sp|Q9Z2A5|ATE1_MOUSE Arginyl-tRNA--protein transferase 1 OS=Mus musculus GN=Ate1 PE=1 SV=2;>sp|Q9Z2A5-2|ATE1_MOUSE Isoform ATE1-2 of Arginyl-tRNA--protein transferase 1 OS=Mus musculus GN=Ate1	2	2
TRUE	Old_Decellularized / Young_Decellularized	Old_Decellularized	Young_Decellularized	10	P58854	42125.1	28497	-0.563869	0.563869	-32.3515	0.676485	0	0.0184118	0.0182709	9	0.198702	P58854	GCP3_MOUSE	Gamma-tubulin complex component 3	Tubgcp3	P58854	Mus musculus	cytoplasmic microtubule organization,centrosome duplication,meiotic cell cycle,interphase microtubule nucleation by interphase microtubule organizing center,mitotic spindle assembly	structural constituent of cytoskeleton,gamma-tubulin binding,microtubule minus-end binding	equatorial microtubule organizing center,cytoplasm,centrosome,centriole,polar microtubule,gamma-tubulin small complex,membrane,spindle pole body	sp	1	2	uniprot_mouse_proteome	>sp|P58854|GCP3_MOUSE Gamma-tubulin complex component 3 OS=Mus musculus GN=Tubgcp3 PE=1 SV=2	2	2
TRUE	Old_Decellularized / Young_Decellularized	Old_Decellularized	Young_Decellularized	10	P97333	39917.2	50170.6	0.329834	0.329834	25.6868	1.25687	0	0.0475085	0.0376373	9	0.133384	P97333	NRP1_MOUSE	Neuropilin-1	Nrp1	P97333	Mus musculus	angiogenesis,patterning of blood vessels,neuron migration,sprouting angiogenesis,cell migration involved in sprouting angiogenesis,outflow tract septum morphogenesis,substrate-dependent cell migration, cell extension,integrin-mediated signaling pathway,axon guidance,axonal fasciculation,heart development,motor neuron axon guidance,response to wounding,positive regulation of endothelial cell migra…	vascular endothelial growth factor-activated receptor activity,GTPase activator activity,protein binding,heparin binding,semaphorin receptor activity,growth factor binding,vascular endothelial growth factor binding,metal ion binding	extracellular space,early endosome,cytosol,neurofilament,plasma membrane,focal adhesion,cell surface,integral component of membrane,axon,growth cone,neuronal cell body,sorting endosome	sp	1	2	uniprot_mouse_proteome	>sp|P97333|NRP1_MOUSE Neuropilin-1 OS=Mus musculus GN=Nrp1 PE=1 SV=2	2	2
TRUE	Old_Decellularized / Young_Decellularized	Old_Decellularized	Young_Decellularized	10	Q3TNL8;Q3TNL8-2	52553	46620.6	-0.172807	0.172807	-11.2885	0.887115	0	0.35934	0.175006	9	0.161563	Q3TNL8;Q3TNL8-2	IPRI_MOUSE	Inositol 1,4,5-trisphosphate receptor-interacting protein;Isoform 2 of Inositol 1,4,5-trisphosphate receptor-interacting protein	Itprip	Q3TNL8;Q3TNL8-2	Mus musculus	negative regulation of protein kinase activity,negative regulation of extrinsic apoptotic signaling pathway via death domain receptors;	protein kinase inhibitor activity,protein binding;	plasma membrane,membrane;	sp	1;	1;	uniprot_mouse_proteome	>sp|Q3TNL8|IPRI_MOUSE Inositol 1,4,5-trisphosphate receptor-interacting protein OS=Mus musculus GN=Itprip PE=1 SV=1;>sp|Q3TNL8-2|IPRI_MOUSE Isoform 2 of Inositol 1,4,5-trisphosphate receptor-interacting protein OS=Mus musculus GN=Itprip	2	2
TRUE	Old_Decellularized / Young_Decellularized	Old_Decellularized	Young_Decellularized	10	Q3U0I9;Q8CFD4	36355.9	36096.1	-0.0103441	0.0103441	-0.714433	0.992856	0	0.717584	0.290044	9	0.194511	Q3U0I9;Q8CFD4	Q3U0I9_MOUSE;SNX8_MOUSE	Sorting nexin-8	Snx8	Q3U0I9;Q8CFD4	Mus musculus	;intracellular protein transport,endocytosis,vesicle organization,early endosome to Golgi transport	;phosphatidylinositol binding,identical protein binding	;endosome,cytosol,extrinsic component of membrane,early endosome membrane,intracellular membrane-bounded organelle,retromer complex	tr;sp	1	1	uniprot_mouse_proteome	>tr|Q3U0I9|Q3U0I9_MOUSE Sorting nexin-8 OS=Mus musculus GN=Snx8 PE=1 SV=1;>sp|Q8CFD4|SNX8_MOUSE Sorting nexin-8 OS=Mus musculus GN=Snx8 PE=1 SV=1	2	2
TRUE	Old_Decellularized / Young_Decellularized	Old_Decellularized	Young_Decellularized	10	Q80TN4	65019.4	59742	-0.122124	0.122124	-8.11661	0.918834	0	0.31788	0.159893	9	0.150505	Q80TN4	DJC16_MOUSE	DnaJ homolog subfamily C member 16	Dnajc16	Q80TN4	Mus musculus	biological_process,cell redox homeostasis		cytosol,integral component of membrane	sp	1	2	uniprot_mouse_proteome	>sp|Q80TN4|DJC16_MOUSE DnaJ homolog subfamily C member 16 OS=Mus musculus GN=Dnajc16 PE=1 SV=2	2	2
TRUE	Old_Decellularized / Young_Decellularized	Old_Decellularized	Young_Decellularized	10	Q80U93	51252.8	44609	-0.200298	0.200298	-12.9629	0.870371	0	0.115677	0.0741376	9	0.186811	Q80U93	NU214_MOUSE	Nuclear pore complex protein Nup214	Nup214	Q80U93	Mus musculus	mRNA export from nucleus,protein import into nucleus,protein export from nucleus,regulation of nucleocytoplasmic transport,regulation of cell cycle	nuclear export signal receptor activity,nucleocytoplasmic transporter activity,nuclear localization sequence binding,structural constituent of nuclear pore	nucleus,focal adhesion,intracellular membrane-bounded organelle,nuclear pore central transport channel,nuclear pore nuclear basket,cytoplasmic side of nuclear pore	sp	1	2	uniprot_mouse_proteome	>sp|Q80U93|NU214_MOUSE Nuclear pore complex protein Nup214 OS=Mus musculus GN=Nup214 PE=1 SV=2	2	2
TRUE	Old_Decellularized / Young_Decellularized	Old_Decellularized	Young_Decellularized	10	Q8BW41;Q8BW41-2	54328.4	44663.8	-0.282602	0.282602	-17.7893	0.822107	0	0.205186	0.114346	9	0.132865	Q8BW41;Q8BW41-2	PMGT2_MOUSE	Protein O-linked-mannose beta-1,4-N-acetylglucosaminyltransferase 2;Isoform 2 of Protein O-linked-mannose beta-1,4-N-acetylglucosaminyltransferase 2	Pomgnt2	Q8BW41;Q8BW41-2	Mus musculus	neuron migration,protein O-linked glycosylation,protein O-linked mannosylation;	acetylglucosaminyltransferase activity,protein O-GlcNAc transferase activity;	endoplasmic reticulum,endoplasmic reticulum membrane,integral component of membrane;	sp	1;	1;	uniprot_mouse_proteome	>sp|Q8BW41|PMGT2_MOUSE Protein O-linked-mannose beta-1,4-N-acetylglucosaminyltransferase 2 OS=Mus musculus GN=Pomgnt2 PE=1 SV=1;>sp|Q8BW41-2|PMGT2_MOUSE Isoform 2 of Protein O-linked-mannose beta-1,4-N-acetylglucosaminyltransferase 2 OS=Mus musculus GN=Pomgnt2	2	2
TRUE	Old_Decellularized / Young_Decellularized	Old_Decellularized	Young_Decellularized	10	Q8BXA5	216407	188070	-0.202475	0.202475	-13.0942	0.869058	0	0.100883	0.0670362	9	0.153213	Q8BXA5	CLP1L_MOUSE	Cleft lip and palate transmembrane protein 1-like protein	Clptm1l	Q8BXA5	Mus musculus	apoptotic process,biological_process	molecular_function	membrane,integral component of membrane	sp	1	1	uniprot_mouse_proteome	>sp|Q8BXA5|CLP1L_MOUSE Cleft lip and palate transmembrane protein 1-like protein OS=Mus musculus GN=Clptm1l PE=1 SV=1	2	2
TRUE	Old_Decellularized / Young_Decellularized	Old_Decellularized	Young_Decellularized	10	Q8C0L0	103604	102793	-0.0113405	0.0113405	-0.782982	0.99217	0	0.832406	0.322032	9	0.137286	Q8C0L0	TMX4_MOUSE	Thioredoxin-related transmembrane protein 4	Tmx4	Q8C0L0	Mus musculus	protein folding,response to endoplasmic reticulum stress,cell redox homeostasis,oxidation-reduction process	protein disulfide isomerase activity	endoplasmic reticulum,integral component of membrane	sp	1	2	uniprot_mouse_proteome	>sp|Q8C0L0|TMX4_MOUSE Thioredoxin-related transmembrane protein 4 OS=Mus musculus GN=Tmx4 PE=1 SV=2	2	2
TRUE	Old_Decellularized / Young_Decellularized	Old_Decellularized	Young_Decellularized	10	Q8K1B8	40672.8	49874.3	0.294233	0.294233	22.6233	1.22623	0	0.0742937	0.053051	9	0.187163	Q8K1B8	URP2_MOUSE	Fermitin family homolog 3	Fermt3	Q8K1B8	Mus musculus	leukocyte cell-cell adhesion,integrin-mediated signaling pathway,positive regulation of cell migration,integrin activation,regulation of cell-cell adhesion mediated by integrin,substrate adhesion-dependent cell spreading,platelet aggregation	integrin binding,protein binding	podosome,membrane,cell junction,cell projection,extracellular exosome	sp	1	1	uniprot_mouse_proteome	>sp|Q8K1B8|URP2_MOUSE Fermitin family homolog 3 OS=Mus musculus GN=Fermt3 PE=1 SV=1	2	2
TRUE	Old_Decellularized / Young_Decellularized	Old_Decellularized	Young_Decellularized	10	Q8R4R6	64545.1	62829.3	-0.0388711	0.0388711	-2.65836	0.973416	0	0.546653	0.238752	9	0.144379	Q8R4R6	NUP53_MOUSE	Nucleoporin NUP53	Nup35	Q8R4R6	Mus musculus	regulation of transcription, DNA-templated,NLS-bearing protein import into nucleus,nuclear pore organization,mRNA transport,cellular response to leukemia inhibitory factor	single-stranded DNA binding,nucleocytoplasmic transporter activity,phospholipid binding,protein homodimerization activity	nucleoplasm,plasma membrane,nuclear membrane,nuclear pore central transport channel,nuclear pore nuclear basket	sp	1	2	uniprot_mouse_proteome	>sp|Q8R4R6|NUP53_MOUSE Nucleoporin NUP53 OS=Mus musculus GN=Nup35 PE=1 SV=2	2	2
TRUE	Old_Decellularized / Young_Decellularized	Old_Decellularized	Young_Decellularized	10	Q920I9;Q920I9-2	138834	125862	-0.141521	0.141521	-9.34372	0.906563	0	0.250782	0.132947	9	0.0926314	Q920I9;Q920I9-2	WDR7_MOUSE	WD repeat-containing protein 7;Isoform 2 of WD repeat-containing protein 7	Wdr7	Q920I9;Q920I9-2	Mus musculus	hematopoietic progenitor cell differentiation;	molecular_function;	cytoplasm,synaptic vesicle;	sp	1;	3;	uniprot_mouse_proteome	>sp|Q920I9|WDR7_MOUSE WD repeat-containing protein 7 OS=Mus musculus GN=Wdr7 PE=1 SV=3;>sp|Q920I9-2|WDR7_MOUSE Isoform 2 of WD repeat-containing protein 7 OS=Mus musculus GN=Wdr7	2	2
TRUE	Old_Decellularized / Young_Decellularized	Old_Decellularized	Young_Decellularized	10	Q9D6F9	5133950	4830438	-0.0879152	0.0879152	-5.91186	0.940881	0	0.703735	0.285742	9	0.332959	Q9D6F9	TBB4A_MOUSE	Tubulin beta-4A chain	Tubb4a	Q9D6F9	Mus musculus	cytoskeleton organization,microtubule-based process,cell projection organization,negative regulation of microtubule polymerization	GTPase activity,structural constituent of cytoskeleton,calcium ion binding,GTP binding	nucleus,cytoplasm,microtubule,cilium,axoneme,microtubule cytoskeleton,internode region of axon,cell projection,neuronal cell body,myelin sheath,extracellular exosome	sp	1	3	uniprot_mouse_proteome	>sp|Q9D6F9|TBB4A_MOUSE Tubulin beta-4A chain OS=Mus musculus GN=Tubb4a PE=1 SV=3	2	2
TRUE	Old_Decellularized / Young_Decellularized	Old_Decellularized	Young_Decellularized	10	Q9D6S7	36929.7	43809.1	0.246449	0.246449	18.6283	1.18628	0	0.270838	0.14116	9	0.343858	Q9D6S7	RRFM_MOUSE	Ribosome-recycling factor, mitochondrial	Mrrf	Q9D6S7	Mus musculus	translation,ribosome disassembly	ribosomal large subunit binding	mitochondrion	sp	1	1	uniprot_mouse_proteome	>sp|Q9D6S7|RRFM_MOUSE Ribosome-recycling factor, mitochondrial OS=Mus musculus GN=Mrrf PE=1 SV=1	2	2
TRUE	Old_Decellularized / Young_Decellularized	Old_Decellularized	Young_Decellularized	10	Q9ESU7	82929.5	46508.5	-0.834389	0.834389	-43.918	0.56082	0	0.0534868	0.0414298	9	0.429555	Q9ESU7	Q9ESU7_MOUSE	Amino acid transporter	Slc1a5	Q9ESU7	Mus musculus				tr	1	1	uniprot_mouse_proteome	>tr|Q9ESU7|Q9ESU7_MOUSE Amino acid transporter OS=Mus musculus GN=Slc1a5 PE=1 SV=1	2	2
TRUE	Old_Decellularized / Young_Decellularized	Old_Decellularized	Young_Decellularized	10	Q9JI78	56558.8	53033.8	-0.0928412	0.0928412	-6.23257	0.937674	0	0.251487	0.133128	9	0.118482	Q9JI78	NGLY1_MOUSE	Peptide-N(4)-(N-acetyl-beta-glucosaminyl)asparagine amidase	Ngly1	Q9JI78	Mus musculus	misfolded or incompletely synthesized protein catabolic process,glycoprotein catabolic process,protein deglycosylation	peptide-N4-(N-acetyl-beta-glucosaminyl)asparagine amidase activity,protein binding,metal ion binding	nucleus,cytoplasm,cytosol	sp	1	2	uniprot_mouse_proteome	>sp|Q9JI78|NGLY1_MOUSE Peptide-N(4)-(N-acetyl-beta-glucosaminyl)asparagine amidase OS=Mus musculus GN=Ngly1 PE=1 SV=2	2	2
TRUE	Old_Decellularized / Young_Decellularized	Old_Decellularized	Young_Decellularized	10	Q9JIG7	42578.6	26021.7	-0.710412	0.710412	-38.8854	0.611146	0	0.107943	0.0704146	9	0.421036	Q9JIG7	CCD22_MOUSE	Coiled-coil domain-containing protein 22	Ccdc22	Q9JIG7	Mus musculus	cellular copper ion homeostasis,Golgi to plasma membrane transport,cytoplasmic sequestering of NF-kappaB,biological_process,protein transport,cholesterol homeostasis,positive regulation of I-kappaB kinase/NF-kappaB signaling,negative regulation of I-kappaB kinase/NF-kappaB signaling,regulation of plasma lipoprotein particle levels,positive regulation of protein ubiquitination involved in ubiquiti…	molecular_function,protein binding,cullin family protein binding	cellular_component,endosome	sp	1	1	uniprot_mouse_proteome	>sp|Q9JIG7|CCD22_MOUSE Coiled-coil domain-containing protein 22 OS=Mus musculus GN=Ccdc22 PE=1 SV=1	2	2
TRUE	Old_Decellularized / Young_Decellularized	Old_Decellularized	Young_Decellularized	10	Q9JJ06	219924	195714	-0.168258	0.168258	-11.0083	0.889917	0	0.286382	0.147787	9	0.11429	Q9JJ06	C1GLT_MOUSE	Glycoprotein-N-acetylgalactosamine 3-beta-galactosyltransferase 1	C1galt1	Q9JJ06	Mus musculus	angiogenesis,kidney development,protein O-linked glycosylation,O-glycan processing, core 1,intestinal epithelial cell development	galactosyltransferase activity,glycoprotein-N-acetylgalactosamine 3-beta-galactosyltransferase activity,metal ion binding	integral component of membrane	sp	1	1	uniprot_mouse_proteome	>sp|Q9JJ06|C1GLT_MOUSE Glycoprotein-N-acetylgalactosamine 3-beta-galactosyltransferase 1 OS=Mus musculus GN=C1galt1 PE=1 SV=1	2	2
TRUE	Old_Decellularized / Young_Decellularized	Old_Decellularized	Young_Decellularized	10	Q9WTR5	58514.2	52189	-0.165041	0.165041	-10.8097	0.891903	0	0.696909	0.283823	9	0.368042	Q9WTR5	CAD13_MOUSE	Cadherin-13	Cdh13	Q9WTR5	Mus musculus	mitotic cell cycle,positive regulation of endothelial cell proliferation,positive regulation of cell-matrix adhesion,sprouting angiogenesis,homophilic cell adhesion via plasma membrane adhesion molecules,negative regulation of cell adhesion,Rho protein signal transduction,negative regulation of cell proliferation,calcium-dependent cell-cell adhesion via plasma membrane cell adhesion molecules,Rac…	calcium ion binding,protein binding,low-density lipoprotein particle binding,protein homodimerization activity,cadherin binding,adiponectin binding,lipoprotein particle binding	extracellular space,cytoplasm,plasma membrane,caveola,focal adhesion,external side of plasma membrane,extracellular matrix,anchored component of membrane,neuron projection,perinuclear region of cytoplasm,extracellular exosome	sp	1	2	uniprot_mouse_proteome	>sp|Q9WTR5|CAD13_MOUSE Cadherin-13 OS=Mus musculus GN=Cdh13 PE=1 SV=2	2	2
TRUE	Old_Decellularized / Young_Decellularized	Old_Decellularized	Young_Decellularized	15	A0A075B5R0;A0A0B4J1P4	71269.3	70053.3	-0.0248281	0.0248281	-1.70623	0.982938	0	0.69581	0.283574	14	0.751031	A0A075B5R0;A0A0B4J1P4	A0A075B5R0_MOUSE;A0A0B4J1P4_MOUSE	Protein Ighv5-16;Protein Ighv5-16 (Fragment)	Ighv5-16	A0A075B5R0;A0A0B4J1P4	Mus musculus	;phagocytosis, recognition,phagocytosis, engulfment,complement activation, classical pathway,defense response to bacterium,innate immune response,B cell receptor signaling pathway,positive regulation of B cell activation	;antigen binding,immunoglobulin receptor binding	;external side of plasma membrane,immunoglobulin complex, circulating,blood microparticle	tr	1	1	uniprot_mouse_proteome	>tr|A0A075B5R0|A0A075B5R0_MOUSE Protein Ighv5-16 OS=Mus musculus GN=Ighv5-16 PE=1 SV=1;>tr|A0A0B4J1P4|A0A0B4J1P4_MOUSE Protein Ighv5-16 (Fragment) OS=Mus musculus GN=Ighv5-16 PE=1 SV=1	2	3
TRUE	Old_Decellularized / Young_Decellularized	Old_Decellularized	Young_Decellularized	10	E9Q794;Q3U3A7;Q3UII8;Q924K8;Q924K8-2	42156.7	31458.1	-0.422331	0.422331	-25.3782	0.746218	0	0.168437	0.099172	9	0.246339	E9Q794;Q3U3A7;Q3UII8;Q924K8;Q924K8-2	E9Q794_MOUSE;Q3U3A7_MOUSE;Q3UII8_MOUSE;MTA3_MOUSE;MTA3_MOUSE	Metastasis-associated protein MTA3;Metastasis-associated protein MTA3;Metastasis-associated protein MTA3;Metastasis-associated protein MTA3;Isoform 2 of Metastasis-associated protein MTA3	Mta3	E9Q794;Q3U3A7;Q3UII8;Q924K8;Q924K8-2	Mus musculus	;;;positive regulation of cell proliferation,positive regulation of G2/M transition of mitotic cell cycle,negative regulation of transcription, DNA-templated;	;;;chromatin binding,transcription factor activity, sequence-specific DNA binding,protein binding,zinc ion binding,protein complex binding,sequence-specific DNA binding;	;;;nucleus,nucleoplasm,cytoplasm,intracellular membrane-bounded organelle;	tr;tr;tr;sp;sp	1;1;1;1;	1;1;1;1;	uniprot_mouse_proteome	>tr|E9Q794|E9Q794_MOUSE Metastasis-associated protein MTA3 OS=Mus musculus GN=Mta3 PE=1 SV=1;>tr|Q3U3A7|Q3U3A7_MOUSE Metastasis-associated protein MTA3 OS=Mus musculus GN=Mta3 PE=1 SV=1;>tr|Q3UII8|Q3UII8_MOUSE Metastasis-associated protein MTA3 OS=Mus musculus GN=Mta3 PE=1 SV=1;>sp|Q924K8|MTA3_MOUSE Metastasis-associated protein MTA3 OS=Mus musculus GN=Mta3 PE=1 SV=1;>sp|Q924K8-2|MTA3_MOUSE Isofo…	2	2
TRUE	Old_Decellularized / Young_Decellularized	Old_Decellularized	Young_Decellularized	10	G3UY33;Q8C754;Q8C754-2	38166.7	32681.3	-0.223851	0.223851	-14.3723	0.856277	0	0.0201852	0.0197286	9	0.0758326	G3UY33;Q8C754;Q8C754-2	G3UY33_MOUSE;VPS52_MOUSE;VPS52_MOUSE	Vacuolar protein sorting-associated protein 52 homolog (Fragment);Vacuolar protein sorting-associated protein 52 homolog;Isoform 2 of Vacuolar protein sorting-associated protein 52 homolog	Vps52	G3UY33;Q8C754;Q8C754-2	Mus musculus	;Golgi to vacuole transport,lysosomal transport,ectodermal cell differentiation,protein transport,endocytic recycling,retrograde transport, endosome to Golgi,embryonic ectodermal digestive tract development;	;Rab GTPase binding,syntaxin binding;	;GARP complex,Golgi apparatus,cytosol,endosome membrane,membrane,perinuclear region of cytoplasm,recycling endosome,EARP complex;	tr;sp;sp	1;1;	2;1;	uniprot_mouse_proteome	>tr|G3UY33|G3UY33_MOUSE Vacuolar protein sorting-associated protein 52 homolog (Fragment) OS=Mus musculus GN=Vps52 PE=1 SV=2;>sp|Q8C754|VPS52_MOUSE Vacuolar protein sorting-associated protein 52 homolog OS=Mus musculus GN=Vps52 PE=1 SV=1;>sp|Q8C754-2|VPS52_MOUSE Isoform 2 of Vacuolar protein sorting-associated protein 52 homolog OS=Mus musculus GN=Vps52	2	2
TRUE	Old_Decellularized / Young_Decellularized	Old_Decellularized	Young_Decellularized	10	P16294	5896.72	16746.1	1.50584	1.50584	183.99	2.8399	0	4.01876e-05	0.000109785	9	0.211875	P16294	FA9_MOUSE	Coagulation factor IX	F9	P16294	Mus musculus	proteolysis,blood coagulation,zymogen activation	endopeptidase activity,serine-type endopeptidase activity,calcium ion binding,peptidase activity	extracellular space,extracellular exosome	sp	2	3	uniprot_mouse_proteome	>sp|P16294|FA9_MOUSE Coagulation factor IX OS=Mus musculus GN=F9 PE=2 SV=3	2	2
TRUE	Old_Decellularized / Young_Decellularized	Old_Decellularized	Young_Decellularized	10	P18052;P18052-2;Q91V35	82845.6	90937.4	0.134448	0.134448	9.76726	1.09767	0	0.673664	0.277322	9	0.13432	P18052;P18052-2;Q91V35	PTPRA_MOUSE;PTPRA_MOUSE;Q91V35_MOUSE	Receptor-type tyrosine-protein phosphatase alpha;Isoform 2 of Receptor-type tyrosine-protein phosphatase alpha;Receptor-type tyrosine-protein phosphatase	Ptpra	P18052;P18052-2;Q91V35	Mus musculus	protein phosphorylation,insulin receptor signaling pathway,peptidyl-tyrosine dephosphorylation;;	protein tyrosine phosphatase activity,protein binding,identical protein binding;;	integral component of membrane,receptor complex,extracellular exosome;;	sp;sp;tr	1;;1	3;;1	uniprot_mouse_proteome	>sp|P18052|PTPRA_MOUSE Receptor-type tyrosine-protein phosphatase alpha OS=Mus musculus GN=Ptpra PE=1 SV=3;>sp|P18052-2|PTPRA_MOUSE Isoform 2 of Receptor-type tyrosine-protein phosphatase alpha OS=Mus musculus GN=Ptpra;>tr|Q91V35|Q91V35_MOUSE Receptor-type tyrosine-protein phosphatase OS=Mus musculus GN=Ptpra PE=1 SV=1	2	2
TRUE	Old_Decellularized / Young_Decellularized	Old_Decellularized	Young_Decellularized	15	P26883	277816	295631	0.0896681	0.0896681	6.41253	1.06413	0	0.937773	0.349795	14	0.316849	P26883	FKB1A_MOUSE	Peptidyl-prolyl cis-trans isomerase FKBP1A	Fkbp1a	P26883	Mus musculus	protein peptidyl-prolyl isomerization,negative regulation of protein phosphorylation,heart morphogenesis,muscle contraction,SMAD protein complex assembly,response to iron ion,cytokine-mediated signaling pathway,response to caffeine,positive regulation of protein ubiquitination,positive regulation of protein binding,negative regulation of phosphoprotein phosphatase activity,regulation of protein l…	peptidyl-prolyl cis-trans isomerase activity,signal transducer activity,protein binding,FK506 binding,drug binding,enzyme binding,Hsp70 protein binding,type I transforming growth factor beta receptor binding,protein homodimerization activity,ion channel binding,SMAD binding,activin binding	cytoplasm,cytosol,membrane,sarcoplasmic reticulum,Z disc,extrinsic component of organelle membrane,sarcoplasmic reticulum membrane,axon terminus,extracellular exosome,cytoplasmic side of membrane,ryanodine receptor complex	sp	1	2	uniprot_mouse_proteome	>sp|P26883|FKB1A_MOUSE Peptidyl-prolyl cis-trans isomerase FKBP1A OS=Mus musculus GN=Fkbp1a PE=1 SV=2	2	3
TRUE	Old_Decellularized / Young_Decellularized	Old_Decellularized	Young_Decellularized	10	P62715;P63330	162559	169446	0.0598537	0.0598537	4.23601	1.04236	0	0.562996	0.243662	9	0.0852189	P62715;P63330	PP2AB_MOUSE;PP2AA_MOUSE	Serine/threonine-protein phosphatase 2A catalytic subunit beta isoform;Serine/threonine-protein phosphatase 2A catalytic subunit alpha isoform	Ppp2cb;Ppp2ca	P62715;P63330	Mus musculus	protein dephosphorylation,apoptotic mitochondrial changes,regulation of gene expression,response to endoplasmic reticulum stress,response to hydrogen peroxide,proteasome-mediated ubiquitin-dependent protein catabolic process,negative regulation of Ras protein signal transduction,response to antibiotic,beta-catenin destruction complex disassembly;regulation of protein phosphorylation,protein depho…	protein serine/threonine phosphatase activity,protein binding,protein C-terminus binding,metal ion binding;protein serine/threonine phosphatase activity,protein binding,protein C-terminus binding,metal ion binding,protein heterodimerization activity,protein dimerization activity,GABA receptor binding	protein phosphatase type 2A complex,chromosome, centromeric region,spindle pole,nucleus,cytoplasm,cytosol,extracellular exosome;protein phosphatase type 2A complex,chromosome, centromeric region,spindle pole,nucleus,cytoplasm,cytosol,plasma membrane,extracellular exosome	sp	1	1	uniprot_mouse_proteome	>sp|P62715|PP2AB_MOUSE Serine/threonine-protein phosphatase 2A catalytic subunit beta isoform OS=Mus musculus GN=Ppp2cb PE=1 SV=1;>sp|P63330|PP2AA_MOUSE Serine/threonine-protein phosphatase 2A catalytic subunit alpha isoform OS=Mus musculus GN=Ppp2ca PE=1 SV=1	2	2
TRUE	Old_Decellularized / Young_Decellularized	Old_Decellularized	Young_Decellularized	10	Q3UZ39	11873.8	16901.6	0.509379	0.509379	42.3437	1.42344	0	0.0867798	0.0597816	9	0.323461	Q3UZ39	LRRF1_MOUSE	Leucine-rich repeat flightless-interacting protein 1	Lrrfip1	Q3UZ39	Mus musculus	negative regulation of transcription from RNA polymerase II promoter,transcription, DNA-templated,positive regulation of NF-kappaB transcription factor activity	RNA polymerase II core promoter proximal region sequence-specific DNA binding,transcriptional repressor activity, RNA polymerase II core promoter proximal region sequence-specific binding,DNA binding,protein binding,protein homodimerization activity,cadherin binding	nucleus,cytosol,plasma membrane	sp	1	2	uniprot_mouse_proteome	>sp|Q3UZ39|LRRF1_MOUSE Leucine-rich repeat flightless-interacting protein 1 OS=Mus musculus GN=Lrrfip1 PE=1 SV=2	2	2
TRUE	Old_Decellularized / Young_Decellularized	Old_Decellularized	Young_Decellularized	10	Q61592	23906.4	37236.8	0.639329	0.639329	55.7605	1.5576	0	0.520757	0.229836	9	0.345405	Q61592	GAS6_MOUSE	Growth arrest-specific protein 6	Gas6	Q61592	Mus musculus	neuron migration,positive regulation of protein phosphorylation,positive regulation of cytokine-mediated signaling pathway,positive regulation of glomerular filtration,protein phosphorylation,phagocytosis,apoptotic process,signal transduction,enzyme linked receptor protein signaling pathway,blood coagulation,cellular response to starvation,regulation of receptor activity,positive regulation of ge…	phosphatidylserine binding,receptor binding,voltage-gated calcium channel activity,calcium ion binding,protein tyrosine kinase activator activity,receptor tyrosine kinase binding,cysteine-type endopeptidase inhibitor activity involved in apoptotic process,receptor agonist activity,binding, bridging	extracellular space,cytoplasm,extracellular exosome	sp	2	2	uniprot_mouse_proteome	>sp|Q61592|GAS6_MOUSE Growth arrest-specific protein 6 OS=Mus musculus GN=Gas6 PE=2 SV=2	2	2
TRUE	Old_Decellularized / Young_Decellularized	Old_Decellularized	Young_Decellularized	10	Q6DFV7	18339.7	34688.2	0.919472	0.919472	89.1423	1.89142	0	0.00635369	0.0079905	9	0.316778	Q6DFV7	NCOA7_MOUSE	Nuclear receptor coactivator 7	Ncoa7	Q6DFV7	Mus musculus	transcription, DNA-templated,positive regulation of transcription from RNA polymerase II promoter,negative regulation of cellular response to oxidative stress,negative regulation of peptidyl-cysteine S-nitrosylation,negative regulation of oxidative stress-induced neuron death	ligand-dependent nuclear receptor transcription coactivator activity,nuclear hormone receptor binding	intracellular,nucleus	sp	1	2	uniprot_mouse_proteome	>sp|Q6DFV7|NCOA7_MOUSE Nuclear receptor coactivator 7 OS=Mus musculus GN=Ncoa7 PE=1 SV=2	2	2
TRUE	Old_Decellularized / Young_Decellularized	Old_Decellularized	Young_Decellularized	10	Q8C4C9;Q9QYI4	97290.1	93084.9	-0.0637464	0.0637464	-4.32237	0.956776	0	0.506992	0.225717	9	0.142703	Q8C4C9;Q9QYI4	Q8C4C9_MOUSE;DJB12_MOUSE	DnaJ (Hsp40) homolog, subfamily B, member 12, isoform CRA_d;DnaJ homolog subfamily B member 12	Dnajb12	Q8C4C9;Q9QYI4	Mus musculus	;ERAD pathway,cellular protein complex assembly,chaperone mediated protein folding requiring cofactor,chaperone cofactor-dependent protein refolding,cellular response to misfolded protein	;Hsp70 protein binding	;endoplasmic reticulum,membrane,integral component of endoplasmic reticulum membrane,nuclear membrane	tr;sp	1	1;2	uniprot_mouse_proteome	>tr|Q8C4C9|Q8C4C9_MOUSE DnaJ (Hsp40) homolog, subfamily B, member 12, isoform CRA_d OS=Mus musculus GN=Dnajb12 PE=1 SV=1;>sp|Q9QYI4|DJB12_MOUSE DnaJ homolog subfamily B member 12 OS=Mus musculus GN=Dnajb12 PE=1 SV=2	2	2
TRUE	Old_Decellularized / Young_Decellularized	Old_Decellularized	Young_Decellularized	10	Q8QZY6	24583.3	28096.4	0.192707	0.192707	14.2906	1.14291	0	0.0336093	0.0288716	9	0.15775	Q8QZY6	TSN14_MOUSE	Tetraspanin-14	Tspan14	Q8QZY6	Mus musculus	cell surface receptor signaling pathway,positive regulation of Notch signaling pathway,protein maturation,protein localization to plasma membrane	enzyme binding	plasma membrane,integral component of plasma membrane,cell surface,tetraspanin-enriched microdomain	sp	1	1	uniprot_mouse_proteome	>sp|Q8QZY6|TSN14_MOUSE Tetraspanin-14 OS=Mus musculus GN=Tspan14 PE=1 SV=1	2	2
TRUE	Old_Decellularized / Young_Decellularized	Old_Decellularized	Young_Decellularized	10	Q91V89	71022.1	55306.1	-0.360829	0.360829	-22.1283	0.778717	0	0.323277	0.161752	9	0.222159	Q91V89	Q91V89_MOUSE	Protein Ppp2r5d	Ppp2r5d	Q91V89	Mus musculus	regulation of protein phosphorylation,signal transduction,positive regulation of neuron projection development,regulation of protein autophosphorylation,positive regulation of protein dephosphorylation,positive regulation of transcription from RNA polymerase II promoter,regulation of catalytic activity,positive regulation of neurotrophin TRK receptor signaling pathway,cellular response to growth …	protein binding,protein phosphatase regulator activity	protein phosphatase type 2A complex	tr	1	1	uniprot_mouse_proteome	>tr|Q91V89|Q91V89_MOUSE Protein Ppp2r5d OS=Mus musculus GN=Ppp2r5d PE=1 SV=1	2	2
TRUE	Old_Decellularized / Young_Decellularized	Old_Decellularized	Young_Decellularized	10	Q91VS8	24238.7	26448.4	0.12587	0.12587	9.11655	1.09117	0	0.070428	0.0509798	9	0.0617787	Q91VS8	FARP2_MOUSE	FERM, RhoGEF and pleckstrin domain-containing protein 2	Farp2	Q91VS8	Mus musculus	cell adhesion,neuron remodeling,Rac protein signal transduction,hair cycle process,osteoclast differentiation,actin cytoskeleton reorganization,regulation of integrin activation,regulation of Rho protein signal transduction,positive regulation of GTPase activity,semaphorin-plexin signaling pathway,podosome assembly	Rho guanyl-nucleotide exchange factor activity,cytoskeletal protein binding,Rac guanyl-nucleotide exchange factor activity	cytoplasm,cytosol,cytoskeleton	sp	1	2	uniprot_mouse_proteome	>sp|Q91VS8|FARP2_MOUSE FERM, RhoGEF and pleckstrin domain-containing protein 2 OS=Mus musculus GN=Farp2 PE=1 SV=2	2	2
TRUE	Old_Decellularized / Young_Decellularized	Old_Decellularized	Young_Decellularized	10	Q91Y74	51382.1	39858.3	-0.366386	0.366386	-22.4277	0.775723	0	0.0929494	0.0629074	9	0.166277	Q91Y74	SIA4C_MOUSE	CMP-N-acetylneuraminate-beta-galactosamide-alpha-2,3-sialyltransferase 4	St3gal4	Q91Y74	Mus musculus	protein glycosylation,glycoprotein biosynthetic process,glycolipid biosynthetic process,oligosaccharide metabolic process,oligosaccharide biosynthetic process,protein N-linked glycosylation via asparagine,lipid glycosylation,cognition,sialylation,protein sialylation	beta-galactoside (CMP) alpha-2,3-sialyltransferase activity,N-acetyllactosaminide alpha-2,3-sialyltransferase activity,monosialoganglioside sialyltransferase activity	Golgi membrane,membrane,integral component of membrane,Golgi cisterna membrane,extracellular exosome	sp	1	1	uniprot_mouse_proteome	>sp|Q91Y74|SIA4C_MOUSE CMP-N-acetylneuraminate-beta-galactosamide-alpha-2,3-sialyltransferase 4 OS=Mus musculus GN=St3gal4 PE=1 SV=1	2	2
TRUE	Old_Decellularized / Young_Decellularized	Old_Decellularized	Young_Decellularized	10	Q9CPX6	76273.6	72282.7	-0.0775334	0.0775334	-5.23235	0.947677	0	0.128095	0.0802214	9	0.0562503	Q9CPX6	ATG3_MOUSE	Ubiquitin-like-conjugating enzyme ATG3	Atg3	Q9CPX6	Mus musculus	autophagosome assembly,mitophagy,cellular protein modification process,protein transport,macroautophagy,protein ubiquitination,mitochondrial fragmentation involved in apoptotic process,nucleophagy,negative regulation of phagocytosis,regulation of cilium assembly	protein binding,ligase activity,Atg8 ligase activity,Atg12 transferase activity,ubiquitin-like protein transferase activity,enzyme binding	cytoplasmic ubiquitin ligase complex,cytosol	sp	1	1	uniprot_mouse_proteome	>sp|Q9CPX6|ATG3_MOUSE Ubiquitin-like-conjugating enzyme ATG3 OS=Mus musculus GN=Atg3 PE=1 SV=1	2	2
TRUE	Old_Decellularized / Young_Decellularized	Old_Decellularized	Young_Decellularized	10	Q9CXA2	39987	41016.6	0.0366776	0.0366776	2.57489	1.02575	0	0.478376	0.21637	9	0.411178	Q9CXA2	T3HPD_MOUSE	Trans-L-3-hydroxyproline dehydratase	L3hypdh	Q9CXA2	Mus musculus	metabolic process	hydro-lyase activity,trans-L-3-hydroxyproline dehydratase activity,proline racemase activity	cellular_component	sp	1	1	uniprot_mouse_proteome	>sp|Q9CXA2|T3HPD_MOUSE Trans-L-3-hydroxyproline dehydratase OS=Mus musculus GN=L3hypdh PE=1 SV=1	2	2
TRUE	Old_Decellularized / Young_Decellularized	Old_Decellularized	Young_Decellularized	10	Q9EQI8	53102.3	55569.3	0.0655142	0.0655142	4.64579	1.04646	0	0.52296	0.230523	9	0.448615	Q9EQI8	RM46_MOUSE	39S ribosomal protein L46, mitochondrial	Mrpl46	Q9EQI8	Mus musculus	biological_process	structural constituent of ribosome,hydrolase activity	nucleoplasm,mitochondrion,mitochondrial large ribosomal subunit,cell junction	sp	1	1	uniprot_mouse_proteome	>sp|Q9EQI8|RM46_MOUSE 39S ribosomal protein L46, mitochondrial OS=Mus musculus GN=Mrpl46 PE=1 SV=1	2	2
[truncated: 2,694 more rows]
