# Supplementary material for: Proteomic quantification of native and ECM-enriched mouse ovaries reveals an age-dependent fibro-inflammatory signature
Source: Aging (Albany NY). 2023 Oct 27;15(20):10821–55. doi: 10.18632/aging.205190 (PMC10637783; doi:10.18632/aging.205190)
Supplement: Supplementary Table 3 [file aging-15-205190-s004.xlsx]

## Sheet: Native Sig Altered Proteins
Supplementary Table 3. Proteins significantly altered with advanced age in native ovaries.
Young and Old Native Mouse Ovaries			180 total proteins significantly altered
	Old_Native / Young_Native		Q < 0.01 and absolute AVG log2 ratio > 0.58
									log2>0.58					Q<0.01
Valid	Comparison (group1/group2)	Condition Numerator	Condition Denominator	# of Ratios	Group	AVG Group Quantity Denominator	AVG Group Quantity Numerator	AVG Log2 Ratio	Absolute AVG Log2 Ratio	% Change	Ratio	Standard Deviation	Pvalue	Qvalue	Degrees Of Freedom	Standard Error	ProteinGroups	ProteinNames	ProteinDescriptions	Genes	UniProtIds	Organisms	GO Biological Process	GO Molecular Function	GO Cellular Component	Database	Protein Existence	Sequence Version	FASTAName	FASTAHeader	# Unique Total Peptides	# Unique Total EG.Id
TRUE	Old_Native / Young_Native	Old_Native	Young_Native	495	Q80YX1	3.20123e+06	7.41501e+06	1.21182	1.21182	131.63	2.3163	0	1.07359e-85	2.41343e-82	494	0.0606459	Q80YX1	TENA_MOUSE	Tenascin	Tnc	Q80YX1	Mus musculus	osteoblast differentiation,cell adhesion,negative regulation of cell adhesion,neuromuscular junction development,positive regulation of cell proliferation,response to mechanical stimulus,positive regulation of gene expression,peripheral nervous system axon regeneration,wound healing,odontogenesis of dentin-containing tooth,response to ethanol,bud outgrowth involved in lung branching,mesenchymal-e…	fibronectin binding,syndecan binding	extracellular region,basement membrane,interstitial matrix,extracellular space,focal adhesion,membrane,extracellular matrix	sp	1	1	uniprot_mouse_proteome	>sp|Q80YX1|TENA_MOUSE Tenascin OS=Mus musculus GN=Tnc PE=1 SV=1	73	99
TRUE	Old_Native / Young_Native	Old_Native	Young_Native	330	O35452	946469	1.5719e+06	0.731885	0.731885	66.0808	1.66081	0	2.3713e-54	1.33267e-51	329	0.0663349	O35452	O35452_MOUSE	Protein Tnxb	Tnxb	O35452	Mus musculus	lipid metabolic process,fatty acid metabolic process,triglyceride metabolic process,cell-matrix adhesion,extracellular matrix organization,collagen fibril organization,collagen metabolic process,regulation of JUN kinase activity,elastic fiber assembly,cell-cell adhesion,phospholipid metabolic process,positive regulation of cell adhesion	collagen binding,heparin binding	extracellular region,proteinaceous extracellular matrix,extracellular space,intracellular,extracellular matrix,extracellular exosome,fibrillar collagen trimer	tr	1	1	uniprot_mouse_proteome	>tr|O35452|O35452_MOUSE Protein Tnxb OS=Mus musculus GN=Tnxb PE=1 SV=1	63	66
TRUE	Old_Native / Young_Native	Old_Native	Young_Native	160	Q8K3V4	7883088	1.87503e+06	-2.07184	2.07184	-76.2145	0.237855	0	1.64751e-48	7.4072e-46	159	0.107856	Q8K3V4	PADI6_MOUSE	Protein-arginine deiminase type-6	Padi6	Q8K3V4	Mus musculus	cytoskeleton organization,cytoplasm organization,protein citrullination,cellular protein localization,histone citrullination,regulation of translation by machinery localization	protein-arginine deiminase activity,calcium ion binding,protein binding	nucleus,cytoplasm,intermediate filament cytoskeleton	sp	1	2	uniprot_mouse_proteome	>sp|Q8K3V4|PADI6_MOUSE Protein-arginine deiminase type-6 OS=Mus musculus GN=Padi6 PE=1 SV=2	22	32
TRUE	Old_Native / Young_Native	Old_Native	Young_Native	115	P09528	10218039	23376848	1.19396	1.19396	128.78	2.2878	0	4.41869e-42	1.24165e-39	114	0.0544412	P09528	FRIH_MOUSE	Ferritin heavy chain	Fth1	P09528	Mus musculus	intracellular sequestering of iron ion,receptor-mediated endocytosis,immune response,negative regulation of cell proliferation,negative regulation of fibroblast proliferation,oxidation-reduction process,iron ion import	ferroxidase activity,iron ion binding,ferric iron binding	extracellular region,nucleus,mitochondrion,autolysosome,extracellular exosome,endocytic vesicle lumen	sp	1	2	uniprot_mouse_proteome	>sp|P09528|FRIH_MOUSE Ferritin heavy chain OS=Mus musculus GN=Fth1 PE=1 SV=2	12	23
TRUE	Old_Native / Young_Native	Old_Native	Young_Native	320	P06795	4379179	12117284	1.46833	1.46833	176.702	2.76702	0	1.05764e-39	2.64175e-37	319	0.0874783	P06795	MDR1B_MOUSE	Multidrug resistance protein 1B	Abcb1b	P06795	Mus musculus	drug transmembrane transport,xenobiotic transport	ATP binding,xenobiotic-transporting ATPase activity	mitochondrion,plasma membrane,integral component of membrane,intercellular canaliculus	sp	1	1	uniprot_mouse_proteome	>sp|P06795|MDR1B_MOUSE Multidrug resistance protein 1B OS=Mus musculus GN=Abcb1b PE=1 SV=1	43	64
TRUE	Old_Native / Young_Native	Old_Native	Young_Native	120	Q9R1M5;Q9R1M5-2;Q9R1M5-3;Q9R1M5-6	955347	312093	-1.61405	1.61405	-67.332	0.32668	0	2.30949e-35	4.71975e-33	119	0.133533	Q9R1M5;Q9R1M5-2;Q9R1M5-3;Q9R1M5-6	NALP5_MOUSE	NACHT, LRR and PYD domains-containing protein 5;Isoform 2 of NACHT, LRR and PYD domains-containing protein 5;Isoform 3 of NACHT, LRR and PYD domains-containing protein 5;Isoform 6 of NACHT, LRR and PYD domains-containing protein 5	Nlrp5	Q9R1M5;Q9R1M5-2;Q9R1M5-3;Q9R1M5-6	Mus musculus	in utero embryonic development,embryo implantation,fertilization,animal organ morphogenesis,regulation of protein stability,cellular protein localization,regulation of RNA stability,cellular protein complex assembly,neuron death;;;	protein binding,ATP binding;;;	nucleolus,cytoplasm,mitochondrion,cytosol,cell cortex,protein complex,apical cortex;;;	sp	1;;;	2;;;	uniprot_mouse_proteome	>sp|Q9R1M5|NALP5_MOUSE NACHT, LRR and PYD domains-containing protein 5 OS=Mus musculus GN=Nlrp5 PE=1 SV=2;>sp|Q9R1M5-2|NALP5_MOUSE Isoform 2 of NACHT, LRR and PYD domains-containing protein 5 OS=Mus musculus GN=Nlrp5;>sp|Q9R1M5-3|NALP5_MOUSE Isoform 3 of NACHT, LRR and PYD domains-containing protein 5 OS=Mus musculus GN=Nlrp5;>sp|Q9R1M5-6|NALP5_MOUSE Isoform 6 of NACHT, LRR and PYD domains-contai…	21	24
TRUE	Old_Native / Young_Native	Old_Native	Young_Native	185	E9PZD8;G3X8Q5;G3X9T8;Q61147	1.7816e+06	2.71172e+06	0.606039	0.606039	52.2075	1.52207	0	1.12887e-31	1.99213e-29	184	0.0598977	E9PZD8;G3X8Q5;G3X9T8;Q61147	E9PZD8_MOUSE;G3X8Q5_MOUSE;G3X9T8_MOUSE;CERU_MOUSE	Ceruloplasmin	Cp	E9PZD8;G3X8Q5;G3X9T8;Q61147	Mus musculus	;;;copper ion transport,cellular iron ion homeostasis,oxidation-reduction process	;;;ferroxidase activity,copper ion binding,chaperone binding	;;;extracellular space,lysosomal membrane,extracellular exosome,blood microparticle	tr;tr;tr;sp	1	1;1;1;2	uniprot_mouse_proteome	>tr|E9PZD8|E9PZD8_MOUSE Ceruloplasmin OS=Mus musculus GN=Cp PE=1 SV=1;>tr|G3X8Q5|G3X8Q5_MOUSE Ceruloplasmin OS=Mus musculus GN=Cp PE=1 SV=1;>tr|G3X9T8|G3X9T8_MOUSE Ceruloplasmin OS=Mus musculus GN=Cp PE=1 SV=1;>sp|Q61147|CERU_MOUSE Ceruloplasmin OS=Mus musculus GN=Cp PE=1 SV=2	30	37
TRUE	Old_Native / Young_Native	Old_Native	Young_Native	170	Q70IV5;Q70IV5-2	634352	1.14493e+06	0.851904	0.851904	80.4881	1.80488	0	3.12843e-29	4.39544e-27	169	0.0570551	Q70IV5;Q70IV5-2	SYNEM_MOUSE	Synemin;Isoform 2 of Synemin	Synm	Q70IV5;Q70IV5-2	Mus musculus	fast-twitch skeletal muscle fiber contraction,intermediate filament cytoskeleton organization;	structural constituent of cytoskeleton,protein binding,structural constituent of muscle,vinculin binding,intermediate filament binding,protein binding, bridging;	intermediate filament,adherens junction,membrane,Z disc,sarcolemma,costamere,intermediate filament cytoskeleton,neurofilament cytoskeleton;	sp	1;	2;	uniprot_mouse_proteome	>sp|Q70IV5|SYNEM_MOUSE Synemin OS=Mus musculus GN=Synm PE=1 SV=2;>sp|Q70IV5-2|SYNEM_MOUSE Isoform 2 of Synemin OS=Mus musculus GN=Synm	32	34
TRUE	Old_Native / Young_Native	Old_Native	Young_Native	160	P82198	2.47753e+06	4.53455e+06	0.872059	0.872059	83.0273	1.83027	0	6.20222e-29	8.20152e-27	159	0.0740441	P82198	BGH3_MOUSE	Transforming growth factor-beta-induced protein ig-h3	Tgfbi	P82198	Mus musculus	angiogenesis,chondrocyte differentiation,cell adhesion,cell proliferation,extracellular matrix organization	integrin binding,collagen binding,extracellular matrix binding	proteinaceous extracellular matrix,basement membrane,extracellular space,trans-Golgi network,extracellular matrix,extracellular exosome	sp	1	1	uniprot_mouse_proteome	>sp|P82198|BGH3_MOUSE Transforming growth factor-beta-induced protein ig-h3 OS=Mus musculus GN=Tgfbi PE=1 SV=1	24	32
TRUE	Old_Native / Young_Native	Old_Native	Young_Native	130	Q6B966	612096	220606	-1.47229	1.47229	-63.959	0.36041	0	8.83581e-29	1.10349e-26	129	0.145729	Q6B966	NAL14_MOUSE	NACHT, LRR and PYD domains-containing protein 14	Nlrp14	Q6B966	Mus musculus	multicellular organism development,spermatogenesis,cell differentiation	molecular_function,ATP binding	cellular_component	sp	2	2	uniprot_mouse_proteome	>sp|Q6B966|NAL14_MOUSE NACHT, LRR and PYD domains-containing protein 14 OS=Mus musculus GN=Nlrp14 PE=2 SV=2	25	26
TRUE	Old_Native / Young_Native	Old_Native	Young_Native	160	P31001	2.42185e+06	4.588e+06	0.921754	0.921754	89.4417	1.89442	0	1.3264e-25	1.56934e-23	159	0.0682674	P31001	DESM_MOUSE	Desmin	Des	P31001	Mus musculus	muscle organ development,intermediate filament organization	structural constituent of cytoskeleton,protein binding,cytoskeletal protein binding,identical protein binding	nucleus,cytoplasm,cytoskeleton,cell-cell junction,fascia adherens,intercalated disc,Z disc,neuromuscular junction,sarcolemma,contractile fiber,intermediate filament cytoskeleton,extracellular exosome,cardiac myofibril,intermediate filament	sp	1	3	uniprot_mouse_proteome	>sp|P31001|DESM_MOUSE Desmin OS=Mus musculus GN=Des PE=1 SV=3	26	32
TRUE	Old_Native / Young_Native	Old_Native	Young_Native	150	B2RQC6;E9QAI5	690335	457730	-0.5928	0.5928	-33.6945	0.663055	0	7.28272e-25	8.18578e-23	149	0.0499849	B2RQC6;E9QAI5	PYR1_MOUSE;E9QAI5_MOUSE	CAD protein	Cad	B2RQC6;E9QAI5	Mus musculus	urea cycle,liver development,'de novo' pyrimidine nucleobase biosynthetic process,UTP biosynthetic process,arginine biosynthetic process,glutamine metabolic process,heart development,female pregnancy,lactation,response to amine,drug metabolic process,peptidyl-threonine phosphorylation,citrulline biosynthetic process,response to caffeine,animal organ regeneration,response to insulin,response to te…	UTP binding,aspartate carbamoyltransferase activity,carbamoyl-phosphate synthase (ammonia) activity,carbamoyl-phosphate synthase (glutamine-hydrolyzing) activity,dihydroorotase activity,protein kinase activity,ATP binding,zinc ion binding,amino acid binding,enzyme binding,identical protein binding;	nucleus,nucleoplasm,cytoplasm,cytosol,membrane,nuclear matrix,neuronal cell body,terminal bouton,protein complex,extracellular exosome;	sp;tr	1	1	uniprot_mouse_proteome	>sp|B2RQC6|PYR1_MOUSE CAD protein OS=Mus musculus GN=Cad PE=1 SV=1;>tr|E9QAI5|E9QAI5_MOUSE CAD protein OS=Mus musculus GN=Cad PE=1 SV=1	30	30
TRUE	Old_Native / Young_Native	Old_Native	Young_Native	140	P16406	1.26528e+06	650763	-0.959257	0.959257	-48.5678	0.514322	0	1.41416e-23	1.51382e-21	139	0.0927709	P16406	AMPE_MOUSE	Glutamyl aminopeptidase	Enpep	P16406	Mus musculus	angiogenesis,angiotensin maturation,regulation of systemic arterial blood pressure by renin-angiotensin,regulation of blood pressure,cell proliferation,cell migration,glomerulus development,peptide catabolic process	aminopeptidase activity,peptidase activity,metallopeptidase activity,zinc ion binding,peptide binding,metalloaminopeptidase activity	lysosomal membrane,plasma membrane,brush border,external side of plasma membrane,integral component of membrane,apical plasma membrane,cytoplasmic vesicle,apical part of cell,extracellular exosome	sp	1	1	uniprot_mouse_proteome	>sp|P16406|AMPE_MOUSE Glutamyl aminopeptidase OS=Mus musculus GN=Enpep PE=1 SV=1	23	28
TRUE	Old_Native / Young_Native	Old_Native	Young_Native	60	P43276	22147078	9287962	-1.25368	1.25368	-58.0624	0.419376	0	2.25306e-23	2.30222e-21	59	0.0815088	P43276	H15_MOUSE	Histone H1.5	Hist1h1b	P43276	Mus musculus	nucleosome assembly,muscle organ development	DNA binding,protein binding	nucleosome,nucleus	sp	1	2	uniprot_mouse_proteome	>sp|P43276|H15_MOUSE Histone H1.5 OS=Mus musculus GN=Hist1h1b PE=1 SV=2	6	12
TRUE	Old_Native / Young_Native	Old_Native	Young_Native	100	Q19LI2	1.76716e+06	4714347	1.41562	1.41562	166.775	2.66775	0	1.34263e-21	1.11787e-19	99	0.111647	Q19LI2	A1BG_MOUSE	Alpha-1B-glycoprotein	A1bg	Q19LI2	Mus musculus	biological_process	molecular_function	extracellular region,extracellular space,extracellular matrix,extracellular exosome,blood microparticle	sp	1	1	uniprot_mouse_proteome	>sp|Q19LI2|A1BG_MOUSE Alpha-1B-glycoprotein OS=Mus musculus GN=A1bg PE=1 SV=1	17	20
TRUE	Old_Native / Young_Native	Old_Native	Young_Native	95	Q8CGN5	727192	465068	-0.644894	0.644894	-36.046	0.63954	0	6.86784e-21	5.32376e-19	94	0.0654674	Q8CGN5	PLIN1_MOUSE	Perilipin-1	Plin1	Q8CGN5	Mus musculus	lipid catabolic process,triglyceride catabolic process	protein binding	endoplasmic reticulum,lipid particle,cytosol	sp	1	2	uniprot_mouse_proteome	>sp|Q8CGN5|PLIN1_MOUSE Perilipin-1 OS=Mus musculus GN=Plin1 PE=1 SV=2	16	19
TRUE	Old_Native / Young_Native	Old_Native	Young_Native	135	Q8BW75	1.43956e+06	4419427	1.61824	1.61824	206.999	3.06999	0	1.17304e-20	8.24062e-19	134	0.165478	Q8BW75	AOFB_MOUSE	Amine oxidase [flavin-containing] B	Maob	Q8BW75	Mus musculus	response to toxic substance,response to aluminum ion,response to selenium ion,negative regulation of serotonin secretion,substantia nigra development,response to lipopolysaccharide,neurotransmitter catabolic process,response to drug,response to ethanol,positive regulation of dopamine metabolic process,response to corticosterone,oxidation-reduction process	primary amine oxidase activity,protein homodimerization activity,flavin adenine dinucleotide binding	mitochondrion,mitochondrial outer membrane,mitochondrial inner membrane,integral component of membrane,extracellular exosome	sp	1	4	uniprot_mouse_proteome	>sp|Q8BW75|AOFB_MOUSE Amine oxidase [flavin-containing] B OS=Mus musculus GN=Maob PE=1 SV=4	20	27
TRUE	Old_Native / Young_Native	Old_Native	Young_Native	65	A0A075B5P6;A0A075B6A0;P01872;P01872-2	306925	869519	1.50233	1.50233	183.3	2.833	0	1.74619e-20	1.18953e-18	64	0.121865	A0A075B5P6;A0A075B6A0;P01872;P01872-2	A0A075B5P6_MOUSE;A0A075B6A0_MOUSE;IGHM_MOUSE;IGHM_MOUSE	Ig mu chain C region (Fragment);Ig mu chain C region (Fragment);Ig mu chain C region;Isoform 2 of Ig mu chain C region	Ighm	A0A075B5P6;A0A075B6A0;P01872;P01872-2	Mus musculus	;;activation of MAPK activity,B cell affinity maturation,humoral immune response mediated by circulating immunoglobulin,regulation of immunoglobulin production,phagocytosis, recognition,phagocytosis, engulfment,complement activation, classical pathway,immunoglobulin mediated immune response,antigen processing and presentation,regulation of cell morphogenesis,positive regulation of B cell prolifer…	;;antigen binding,transmembrane signaling receptor activity,protein binding,immunoglobulin receptor binding,identical protein binding;	;;extracellular space,cytosol,plasma membrane,external side of plasma membrane,cell surface,membrane,integral component of membrane,B cell receptor complex,immunoglobulin complex, circulating,perinuclear region of cytoplasm,blood microparticle;	tr;tr;sp;sp	1;1;1;	1;2;2;	uniprot_mouse_proteome	>tr|A0A075B5P6|A0A075B5P6_MOUSE Ig mu chain C region (Fragment) OS=Mus musculus GN=Ighm PE=1 SV=1;>tr|A0A075B6A0|A0A075B6A0_MOUSE Ig mu chain C region (Fragment) OS=Mus musculus GN=Ighm PE=1 SV=2;>sp|P01872|IGHM_MOUSE Ig mu chain C region OS=Mus musculus GN=Ighm PE=1 SV=2;>sp|P01872-2|IGHM_MOUSE Isoform 2 of Ig mu chain C region OS=Mus musculus GN=Ighm	12	13
TRUE	Old_Native / Young_Native	Old_Native	Young_Native	95	Q8VDF2;Q8VDF2-2	527992	197109	-1.42152	1.42152	-62.6681	0.373319	0	4.40065e-20	2.74796e-18	94	0.21894	Q8VDF2;Q8VDF2-2	UHRF1_MOUSE	E3 ubiquitin-protein ligase UHRF1;Isoform 2 of E3 ubiquitin-protein ligase UHRF1	Uhrf1	Q8VDF2;Q8VDF2-2	Mus musculus	negative regulation of transcription from RNA polymerase II promoter,DNA repair,transcription, DNA-templated,cell cycle,cell proliferation,maintenance of DNA methylation,histone monoubiquitination,histone ubiquitination,positive regulation of cellular protein metabolic process,DNA methylation on cytosine,protein ubiquitination involved in ubiquitin-dependent protein catabolic process,protein auto…	core promoter proximal region sequence-specific DNA binding,ubiquitin-protein transferase activity,protein binding,zinc ion binding,methyl-CpG binding,nucleosomal histone binding,methylated histone binding,histone binding,identical protein binding,hemi-methylated DNA-binding,ubiquitin protein ligase activity;	nuclear chromatin,euchromatin,heterochromatin,nucleus,nucleoplasm,replication fork,nuclear heterochromatin,nuclear matrix;	sp	1;	2;	uniprot_mouse_proteome	>sp|Q8VDF2|UHRF1_MOUSE E3 ubiquitin-protein ligase UHRF1 OS=Mus musculus GN=Uhrf1 PE=1 SV=2;>sp|Q8VDF2-2|UHRF1_MOUSE Isoform 2 of E3 ubiquitin-protein ligase UHRF1 OS=Mus musculus GN=Uhrf1	18	19
TRUE	Old_Native / Young_Native	Old_Native	Young_Native	85	Q52KC3	623811	309403	-1.01162	1.01162	-50.4012	0.495988	0	6.97149e-19	4.12419e-17	84	0.116023	Q52KC3	Q52KC3_MOUSE	DNA helicase	Mcm5	Q52KC3	Mus musculus				tr	1	1	uniprot_mouse_proteome	>tr|Q52KC3|Q52KC3_MOUSE DNA helicase OS=Mus musculus GN=Mcm5 PE=1 SV=1	17	17
TRUE	Old_Native / Young_Native	Old_Native	Young_Native	90	Q91WT7	2.8605e+06	1.77385e+06	-0.689388	0.689388	-37.9883	0.620117	0	7.42613e-19	4.2805e-17	89	0.0745208	Q91WT7	Q91WT7_MOUSE	3-alpha-hydroxysteroid dehydrogenase type 1	Akr1c14	Q91WT7	Mus musculus	hippocampus development,oxidation-reduction process	androsterone dehydrogenase activity	cellular_component	tr	1	1	uniprot_mouse_proteome	>tr|Q91WT7|Q91WT7_MOUSE 3-alpha-hydroxysteroid dehydrogenase type 1 OS=Mus musculus GN=Akr1c14 PE=1 SV=1	14	18
TRUE	Old_Native / Young_Native	Old_Native	Young_Native	130	P16125	16080511	9462072	-0.765085	0.765085	-41.1581	0.588419	0	8.51867e-19	4.78749e-17	129	0.0731625	P16125	LDHB_MOUSE	L-lactate dehydrogenase B chain	Ldhb	P16125	Mus musculus	carbohydrate metabolic process,lactate biosynthetic process from pyruvate,NAD metabolic process,oxidation-reduction process	L-lactate dehydrogenase activity,kinase binding,identical protein binding,NAD binding	mitochondrion,cytosol,membrane,myelin sheath,membrane raft,extracellular exosome	sp	1	2	uniprot_mouse_proteome	>sp|P16125|LDHB_MOUSE L-lactate dehydrogenase B chain OS=Mus musculus GN=Ldhb PE=1 SV=2	16	26
TRUE	Old_Native / Young_Native	Old_Native	Young_Native	65	P01863;P01865	677881	6.80818e+06	3.32817	3.32817	904.334	10.0433	0	1.05236e-18	5.63264e-17	64	0.249067	P01863;P01865	GCAA_MOUSE;GCAM_MOUSE	Ig gamma-2A chain C region, A allele;Ig gamma-2A chain C region, membrane-bound form	Ighg;Igh-1a	P01863;P01865	Mus musculus	phagocytosis, recognition,phagocytosis, engulfment,complement activation, classical pathway,defense response to bacterium,innate immune response,B cell receptor signaling pathway,positive regulation of B cell activation;antibody-dependent cellular cytotoxicity,positive regulation of type IIa hypersensitivity,positive regulation of type I hypersensitivity,humoral immune response mediated by circul…	antigen binding,immunoglobulin receptor binding;antigen binding,immunoglobulin receptor binding	external side of plasma membrane,immunoglobulin complex, circulating,blood microparticle;multivesicular body,cytosol,external side of plasma membrane,integral component of membrane,immunoglobulin complex, circulating,blood microparticle	sp	1	1;3	uniprot_mouse_proteome	>sp|P01863|GCAA_MOUSE Ig gamma-2A chain C region, A allele OS=Mus musculus GN=Ighg PE=1 SV=1;>sp|P01865|GCAM_MOUSE Ig gamma-2A chain C region, membrane-bound form OS=Mus musculus GN=Igh-1a PE=1 SV=3	7	13
TRUE	Old_Native / Young_Native	Old_Native	Young_Native	90	P25206	868109	533582	-0.702168	0.702168	-38.5352	0.614648	0	1.58024e-18	8.26135e-17	89	0.0986469	P25206	MCM3_MOUSE	DNA replication licensing factor MCM3	Mcm3	P25206	Mus musculus	DNA replication initiation,cell cycle	DNA binding,helicase activity,ATP binding	nuclear chromosome, telomeric region,nucleus,nucleoplasm,cytoplasm,centrosome,membrane,MCM complex,perinuclear region of cytoplasm	sp	1	2	uniprot_mouse_proteome	>sp|P25206|MCM3_MOUSE DNA replication licensing factor MCM3 OS=Mus musculus GN=Mcm3 PE=1 SV=2	17	18
TRUE	Old_Native / Young_Native	Old_Native	Young_Native	85	P97310	610938	294387	-1.05331	1.05331	-51.8139	0.481861	0	6.13393e-18	3.13388e-16	84	0.105072	P97310	MCM2_MOUSE	DNA replication licensing factor MCM2	Mcm2	P97310	Mus musculus	DNA unwinding involved in DNA replication,DNA replication initiation,nucleosome assembly,apoptotic process,cell cycle,cellular response to interleukin-4,cochlea development	DNA helicase activity,DNA replication origin binding,ATP binding,enzyme binding,histone binding,metal ion binding	nuclear chromosome, telomeric region,chromatin,nucleus,nucleoplasm,nuclear origin of replication recognition complex,cytoplasm,cytosol,microtubule cytoskeleton,MCM complex	sp	1	3	uniprot_mouse_proteome	>sp|P97310|MCM2_MOUSE DNA replication licensing factor MCM2 OS=Mus musculus GN=Mcm2 PE=1 SV=3	17	17
TRUE	Old_Native / Young_Native	Old_Native	Young_Native	45	P01868;P01869	665350	2.28145e+06	1.77777	1.77777	242.895	3.42895	0	1.78177e-17	8.52216e-16	44	0.116938	P01868;P01869	IGHG1_MOUSE;IGH1M_MOUSE	Ig gamma-1 chain C region secreted form;Ig gamma-1 chain C region, membrane-bound form	Ighg1	P01868;P01869	Mus musculus	;antibody-dependent cellular cytotoxicity,positive regulation of type IIa hypersensitivity,positive regulation of type I hypersensitivity,humoral immune response mediated by circulating immunoglobulin,phagocytosis, recognition,phagocytosis, engulfment,complement activation, classical pathway,immunoglobulin mediated immune response,antibacterial humoral response,defense response to bacterium,innat…	;antigen binding,immunoglobulin receptor binding	;extracellular space,external side of plasma membrane,integral component of membrane,immunoglobulin complex, circulating,blood microparticle	sp	1	1;2	uniprot_mouse_proteome	>sp|P01868|IGHG1_MOUSE Ig gamma-1 chain C region secreted form OS=Mus musculus GN=Ighg1 PE=1 SV=1;>sp|P01869|IGH1M_MOUSE Ig gamma-1 chain C region, membrane-bound form OS=Mus musculus GN=Ighg1 PE=1 SV=2	7	9
TRUE	Old_Native / Young_Native	Old_Native	Young_Native	70	Q00519	435038	726905	0.740627	0.740627	67.0901	1.6709	0	1.90265e-17	8.91073e-16	69	0.072699	Q00519	XDH_MOUSE	Xanthine dehydrogenase/oxidase	Xdh	Q00519	Mus musculus	negative regulation of protein phosphorylation,negative regulation of endothelial cell proliferation,activation of cysteine-type endopeptidase activity involved in apoptotic process,lactation,xanthine catabolic process,negative regulation of gene expression,regulation of epithelial cell differentiation,negative regulation of endothelial cell differentiation,negative regulation of protein kinase B…	xanthine dehydrogenase activity,xanthine oxidase activity,iron ion binding,protein binding,electron carrier activity,oxidoreductase activity,oxidoreductase activity, acting on CH-OH group of donors,oxidoreductase activity, acting on the aldehyde or oxo group of donors,molybdenum ion binding,protein homodimerization activity,molybdopterin cofactor binding,flavin adenine dinucleotide binding,2 iron…	extracellular space,peroxisome,cytosol,sarcoplasmic reticulum	sp	1	5	uniprot_mouse_proteome	>sp|Q00519|XDH_MOUSE Xanthine dehydrogenase/oxidase OS=Mus musculus GN=Xdh PE=1 SV=5	14	14
TRUE	Old_Native / Young_Native	Old_Native	Young_Native	50	Q9R0P9	2.53457e+06	929026	-1.44795	1.44795	-63.3458	0.366542	0	2.14636e-17	9.84699e-16	49	0.12767	Q9R0P9	UCHL1_MOUSE	Ubiquitin carboxyl-terminal hydrolase isozyme L1	Uchl1	Q9R0P9	Mus musculus	response to ischemia,ubiquitin-dependent protein catabolic process,axonogenesis,axon target recognition,adult walking behavior,cell proliferation,protein deubiquitination,sensory perception of pain,axonal transport of mitochondrion,eating behavior,negative regulation of MAP kinase activity,muscle fiber development,neuromuscular process	cysteine-type endopeptidase activity,thiol-dependent ubiquitin-specific protease activity,omega peptidase activity,ligase activity,ubiquitin protein ligase binding,alpha-2A adrenergic receptor binding,ubiquitin binding	nucleoplasm,cytoplasm,endoplasmic reticulum membrane,cytosol,axon,neuronal cell body,myelin sheath,neuron projection terminus,extracellular exosome,axon cytoplasm,plasma membrane	sp	1	1	uniprot_mouse_proteome	>sp|Q9R0P9|UCHL1_MOUSE Ubiquitin carboxyl-terminal hydrolase isozyme L1 OS=Mus musculus GN=Uchl1 PE=1 SV=1	8	10
TRUE	Old_Native / Young_Native	Old_Native	Young_Native	60	Q9R112	547364	893368	0.706754	0.706754	63.2128	1.63213	0	3.09656e-17	1.39221e-15	59	0.0537641	Q9R112	SQRD_MOUSE	Sulfide:quinone oxidoreductase, mitochondrial	Sqrdl	Q9R112	Mus musculus	sulfide oxidation, using sulfide:quinone oxidoreductase,hydrogen sulfide metabolic process	quinone binding,sulfide:quinone oxidoreductase activity	mitochondrion,mitochondrial inner membrane	sp	1	3	uniprot_mouse_proteome	>sp|Q9R112|SQRD_MOUSE Sulfide:quinone oxidoreductase, mitochondrial OS=Mus musculus GN=Sqrdl PE=1 SV=3	11	12
TRUE	Old_Native / Young_Native	Old_Native	Young_Native	155	Q99NB1	1.18968e+06	2.04707e+06	0.782982	0.782982	72.0684	1.72068	0	2.0767e-16	8.33647e-15	154	0.0937705	Q99NB1	ACS2L_MOUSE	Acetyl-coenzyme A synthetase 2-like, mitochondrial	Acss1	Q99NB1	Mus musculus	acetyl-CoA biosynthetic process,acetate biosynthetic process,acetyl-CoA biosynthetic process from acetate,propionate biosynthetic process	acetate-CoA ligase activity,ATP binding,AMP binding	mitochondrion,mitochondrial matrix	sp	1	1	uniprot_mouse_proteome	>sp|Q99NB1|ACS2L_MOUSE Acetyl-coenzyme A synthetase 2-like, mitochondrial OS=Mus musculus GN=Acss1 PE=1 SV=1	27	31
TRUE	Old_Native / Young_Native	Old_Native	Young_Native	100	P10605	7130472	10772891	0.595336	0.595336	51.0824	1.51082	0	5.8373e-16	2.22411e-14	99	0.0643637	P10605	CATB_MOUSE	Cathepsin B	Ctsb	P10605	Mus musculus	proteolysis,collagen catabolic process,epithelial cell differentiation,decidualization,viral entry into host cell,regulation of catalytic activity,proteolysis involved in cellular protein catabolic process,cellular response to thyroid hormone stimulus	cysteine-type endopeptidase activity,collagen binding,peptidase activity,cysteine-type peptidase activity,proteoglycan binding	extracellular space,nucleolus,mitochondrion,lysosome,melanosome,intracellular membrane-bounded organelle,perinuclear region of cytoplasm,extracellular exosome	sp	1	2	uniprot_mouse_proteome	>sp|P10605|CATB_MOUSE Cathepsin B OS=Mus musculus GN=Ctsb PE=1 SV=2	10	20
TRUE	Old_Native / Young_Native	Old_Native	Young_Native	105	B1AU75;Q99MD9	894930	582750	-0.618898	0.618898	-34.8832	0.651168	0	1.01961e-15	3.69691e-14	104	0.0969014	B1AU75;Q99MD9	B1AU75_MOUSE;NASP_MOUSE	Nuclear autoantigenic sperm protein	Nasp	B1AU75;Q99MD9	Mus musculus	;blastocyst development,DNA replication,nucleosome assembly,DNA replication-dependent nucleosome assembly,DNA replication-independent nucleosome assembly,cell cycle,cell proliferation,protein transport,histone exchange	;protein binding,protein complex binding,histone binding,Hsp90 protein binding	;nuclear chromatin,nucleus,nucleoplasm,cytoplasm,protein complex	tr;sp	1	1;2	uniprot_mouse_proteome	>tr|B1AU75|B1AU75_MOUSE Nuclear autoantigenic sperm protein OS=Mus musculus GN=Nasp PE=1 SV=1;>sp|Q99MD9|NASP_MOUSE Nuclear autoantigenic sperm protein OS=Mus musculus GN=Nasp PE=1 SV=2	19	21
TRUE	Old_Native / Young_Native	Old_Native	Young_Native	25	D3YYR5;D3Z5U5;Q9Z256;Q9Z257	114423	200246	0.807395	0.807395	75.0049	1.75005	0	1.14083e-15	4.07078e-14	24	0.0433246	D3YYR5;D3Z5U5;Q9Z256;Q9Z257	D3YYR5_MOUSE;D3Z5U5_MOUSE;Q9Z256_MOUSE;Q9Z257_MOUSE	P2X purinoceptor 4;P2X purinoceptor;P2X purinoceptor;P2X purinoceptor	P2rx4	D3YYR5;D3Z5U5;Q9Z256;Q9Z257	Mus musculus	;;;	;;;	;;;	tr	1	2;2;1;1	uniprot_mouse_proteome	>tr|D3YYR5|D3YYR5_MOUSE P2X purinoceptor 4 OS=Mus musculus GN=P2rx4 PE=1 SV=2;>tr|D3Z5U5|D3Z5U5_MOUSE P2X purinoceptor OS=Mus musculus GN=P2rx4 PE=1 SV=2;>tr|Q9Z256|Q9Z256_MOUSE P2X purinoceptor OS=Mus musculus GN=P2rx4 PE=1 SV=1;>tr|Q9Z257|Q9Z257_MOUSE P2X purinoceptor OS=Mus musculus GN=P2rx4 PE=1 SV=1	5	5
TRUE	Old_Native / Young_Native	Old_Native	Young_Native	100	P97311;Q3ULG5	588817	336632	-0.806645	0.806645	-42.829	0.57171	0	4.81303e-15	1.69058e-13	99	0.129854	P97311;Q3ULG5	MCM6_MOUSE;Q3ULG5_MOUSE	DNA replication licensing factor MCM6;DNA helicase	Mcm6	P97311;Q3ULG5	Mus musculus	DNA unwinding involved in DNA replication,DNA replication initiation,cell cycle;	single-stranded DNA binding,protein binding,ATP binding,identical protein binding,DNA helicase activity,ATP-dependent DNA helicase activity;	nuclear chromosome, telomeric region,nucleus,nucleoplasm,MCM complex;	sp;tr	1	1	uniprot_mouse_proteome	>sp|P97311|MCM6_MOUSE DNA replication licensing factor MCM6 OS=Mus musculus GN=Mcm6 PE=1 SV=1;>tr|Q3ULG5|Q3ULG5_MOUSE DNA helicase OS=Mus musculus GN=Mcm6 PE=1 SV=1	19	20
TRUE	Old_Native / Young_Native	Old_Native	Young_Native	140	Q9CPX4	42569136	80224152	0.914229	0.914229	88.4561	1.88456	0	1.4543e-14	4.8795e-13	139	0.111673	Q9CPX4	Q9CPX4_MOUSE	Ferritin	Ftl1-ps1	Q9CPX4	Mus musculus				tr	1	1	uniprot_mouse_proteome	>tr|Q9CPX4|Q9CPX4_MOUSE Ferritin OS=Mus musculus GN=Ftl1-ps1 PE=1 SV=1	13	28
TRUE	Old_Native / Young_Native	Old_Native	Young_Native	110	Q8BPB5	890477	2.01723e+06	1.17972	1.17972	126.533	2.26533	0	1.83139e-14	6.05435e-13	109	0.126301	Q8BPB5	FBLN3_MOUSE	EGF-containing fibulin-like extracellular matrix protein 1	Efemp1	Q8BPB5	Mus musculus	regulation of transcription, DNA-templated,epidermal growth factor receptor signaling pathway,regulation of receptor activity,peptidyl-tyrosine phosphorylation,negative regulation of chondrocyte differentiation,camera-type eye development,embryonic eye morphogenesis,post-embryonic eye morphogenesis	epidermal growth factor-activated receptor activity,epidermal growth factor receptor binding,calcium ion binding,growth factor activity	proteinaceous extracellular matrix,extracellular space,extracellular exosome,extracellular matrix	sp	1	1	uniprot_mouse_proteome	>sp|Q8BPB5|FBLN3_MOUSE EGF-containing fibulin-like extracellular matrix protein 1 OS=Mus musculus GN=Efemp1 PE=1 SV=1	17	22
TRUE	Old_Native / Young_Native	Old_Native	Young_Native	50	A0A075B5P5;P03987;P03987-2	890312	2252231	1.33897	1.33897	152.971	2.52971	0	2.03585e-14	6.63274e-13	49	0.118763	A0A075B5P5;P03987;P03987-2	A0A075B5P5_MOUSE;IGHG3_MOUSE;IGHG3_MOUSE	Protein Ighg3 (Fragment);Ig gamma-3 chain C region;Isoform 2 of Ig gamma-3 chain C region	Ighg3;;	A0A075B5P5;P03987;P03987-2	Mus musculus	;;	;antigen binding,immunoglobulin receptor binding;	;extracellular region,plasma membrane,integral component of membrane;	tr;sp;sp	4;1;	1;2;	uniprot_mouse_proteome	>tr|A0A075B5P5|A0A075B5P5_MOUSE Protein Ighg3 (Fragment) OS=Mus musculus GN=Ighg3 PE=4 SV=1;>sp|P03987|IGHG3_MOUSE Ig gamma-3 chain C region OS=Mus musculus PE=1 SV=2;>sp|P03987-2|IGHG3_MOUSE Isoform 2 of Ig gamma-3 chain C region OS=Mus musculus	8	10
TRUE	Old_Native / Young_Native	Old_Native	Young_Native	85	P51885	4585680	7369347	0.684401	0.684401	60.7035	1.60703	0	2.46154e-14	7.90505e-13	84	0.073656	P51885	LUM_MOUSE	Lumican	Lum	P51885	Mus musculus	visual perception,response to organic cyclic compound,collagen fibril organization,positive regulation of transforming growth factor beta1 production,positive regulation of transcription from RNA polymerase II promoter,cartilage development,response to growth factor,axonogenesis	collagen binding	proteinaceous extracellular matrix,fibrillar collagen trimer,extracellular space,extracellular matrix,extracellular exosome	sp	1	2	uniprot_mouse_proteome	>sp|P51885|LUM_MOUSE Lumican OS=Mus musculus GN=Lum PE=1 SV=2	12	17
TRUE	Old_Native / Young_Native	Old_Native	Young_Native	60	Q80ZX8;Q80ZX8-2;Q80ZX8-3	178679	438144	1.29404	1.29404	145.214	2.45214	0	7.54037e-14	2.2014e-12	59	0.145512	Q80ZX8;Q80ZX8-2;Q80ZX8-3	SPAG1_MOUSE	Sperm-associated antigen 1;Isoform 2 of Sperm-associated antigen 1;Isoform 3 of Sperm-associated antigen 1	Spag1	Q80ZX8;Q80ZX8-2;Q80ZX8-3	Mus musculus	single fertilization,axonemal dynein complex assembly;;	GTP binding,hydrolase activity;;	cytoplasm,cytosol;;	sp	1;;	1;;	uniprot_mouse_proteome	>sp|Q80ZX8|SPAG1_MOUSE Sperm-associated antigen 1 OS=Mus musculus GN=Spag1 PE=1 SV=1;>sp|Q80ZX8-2|SPAG1_MOUSE Isoform 2 of Sperm-associated antigen 1 OS=Mus musculus GN=Spag1;>sp|Q80ZX8-3|SPAG1_MOUSE Isoform 3 of Sperm-associated antigen 1 OS=Mus musculus GN=Spag1	9	12
TRUE	Old_Native / Young_Native	Old_Native	Young_Native	75	Q9CWU5-2	837378	184764	-2.1802	2.1802	-77.9354	0.220646	0	1.26011e-13	3.4972e-12	74	0.279671	Q9CWU5-2	KHDC3_MOUSE	Isoform 2 of KH domain-containing protein 3	Khdc3	Q9CWU5-2	Mus musculus				sp			uniprot_mouse_proteome	>sp|Q9CWU5-2|KHDC3_MOUSE Isoform 2 of KH domain-containing protein 3 OS=Mus musculus GN=Khdc3	14	15
TRUE	Old_Native / Young_Native	Old_Native	Young_Native	70	D3YYU8	379376	231064	-0.715339	0.715339	-39.0938	0.609062	0	4.5531e-13	1.16311e-11	69	0.108419	D3YYU8	OBSL1_MOUSE	Obscurin-like protein 1	Obsl1	D3YYU8	Mus musculus	microtubule cytoskeleton organization,striated muscle contraction,actin filament organization,Golgi organization,regulation of mitotic nuclear division,protein localization to Golgi apparatus,sarcomere organization,positive regulation of dendrite morphogenesis,striated muscle myosin thick filament assembly	structural constituent of muscle,actin filament binding,muscle alpha-actinin binding,structural molecule activity conferring elasticity	cytoplasm,Golgi apparatus,centrosome,muscle myosin complex,Z disc,M band,perinuclear region of cytoplasm,3M complex	sp	1	1	uniprot_mouse_proteome	>sp|D3YYU8|OBSL1_MOUSE Obscurin-like protein 1 OS=Mus musculus GN=Obsl1 PE=1 SV=1	14	14
TRUE	Old_Native / Young_Native	Old_Native	Young_Native	75	Q61881	610514	280707	-1.12096	1.12096	-54.0211	0.459789	0	1.26352e-12	3.05418e-11	74	0.139558	Q61881	MCM7_MOUSE	DNA replication licensing factor MCM7	Mcm7	Q61881	Mus musculus	DNA unwinding involved in DNA replication,DNA replication initiation,cellular response to DNA damage stimulus,cell cycle,cell proliferation,regulation of phosphorylation,response to drug,cellular response to epidermal growth factor stimulus,cellular response to xenobiotic stimulus	single-stranded DNA binding,protein binding,ATP binding,DNA helicase activity,ATP-dependent DNA helicase activity	nuclear chromosome, telomeric region,nucleus,nucleoplasm,cytosol,membrane,MCM complex	sp	1	1	uniprot_mouse_proteome	>sp|Q61881|MCM7_MOUSE DNA replication licensing factor MCM7 OS=Mus musculus GN=Mcm7 PE=1 SV=1	15	15
TRUE	Old_Native / Young_Native	Old_Native	Young_Native	45	Q9Z0E6	212303	384042	0.855139	0.855139	80.8933	1.80893	0	1.58091e-12	3.78074e-11	44	0.112835	Q9Z0E6	GBP2_MOUSE	Guanylate-binding protein 1	Gbp2	Q9Z0E6	Mus musculus	cellular response to interferon-beta,defense response to protozoan,adhesion of symbiont to host,defense response to Gram-positive bacterium,cellular response to lipopolysaccharide,cellular response to interferon-gamma	GTPase activity,GTP binding	Golgi membrane,nucleoplasm,cytosol,actin cytoskeleton,symbiont-containing vacuole membrane,cytoplasmic vesicle,perinuclear region of cytoplasm	sp	1	1	uniprot_mouse_proteome	>sp|Q9Z0E6|GBP2_MOUSE Guanylate-binding protein 1 OS=Mus musculus GN=Gbp2 PE=1 SV=1	7	9
TRUE	Old_Native / Young_Native	Old_Native	Young_Native	95	A0A075B5P3	2.77688e+06	7794839	1.48905	1.48905	180.705	2.80705	0	1.92885e-12	4.51673e-11	94	0.152934	A0A075B5P3	A0A075B5P3_MOUSE	Protein Ighg2b (Fragment)	Ighg2b	A0A075B5P3	Mus musculus				tr	1	1	uniprot_mouse_proteome	>tr|A0A075B5P3|A0A075B5P3_MOUSE Protein Ighg2b (Fragment) OS=Mus musculus GN=Ighg2b PE=1 SV=1	12	19
TRUE	Old_Native / Young_Native	Old_Native	Young_Native	70	Q9WVB3	1153270	421869	-1.45086	1.45086	-63.4198	0.365802	0	2.55435e-12	5.80561e-11	69	0.267514	Q9WVB3	TLE6_MOUSE	Transducin-like enhancer protein 6	Tle6	Q9WVB3	Mus musculus	positive regulation of neuron differentiation,positive regulation of neurogenesis,embryonic process involved in female pregnancy	protein binding	nucleus,cytosol,cell cortex,protein complex	sp	1	1	uniprot_mouse_proteome	>sp|Q9WVB3|TLE6_MOUSE Transducin-like enhancer protein 6 OS=Mus musculus GN=Tle6 PE=1 SV=1	13	14
TRUE	Old_Native / Young_Native	Old_Native	Young_Native	40	A0A0R4J138;P50429;P50429-2	565506	862139	0.608378	0.608378	52.4544	1.52454	0	2.66241e-12	5.92585e-11	39	0.0627496	A0A0R4J138;P50429;P50429-2	A0A0R4J138_MOUSE;ARSB_MOUSE;ARSB_MOUSE	Arylsulfatase B;Arylsulfatase B;Isoform 2 of Arylsulfatase B	Arsb	A0A0R4J138;P50429;P50429-2	Mus musculus	;metabolic process,regulation of epithelial cell migration,positive regulation of neuron projection development,colon epithelial cell migration;	;N-acetylgalactosamine-4-sulfatase activity,arylsulfatase activity,metal ion binding;	;lysosome,cell surface,extracellular exosome;	tr;sp;sp	1;1;	1;3;	uniprot_mouse_proteome	>tr|A0A0R4J138|A0A0R4J138_MOUSE Arylsulfatase B OS=Mus musculus GN=Arsb PE=1 SV=1;>sp|P50429|ARSB_MOUSE Arylsulfatase B OS=Mus musculus GN=Arsb PE=1 SV=3;>sp|P50429-2|ARSB_MOUSE Isoform 2 of Arylsulfatase B OS=Mus musculus GN=Arsb	8	8
TRUE	Old_Native / Young_Native	Old_Native	Young_Native	35	P97821	248269	416906	0.74782	0.74782	67.9254	1.67925	0	2.06605e-11	4.03868e-10	34	0.0863	P97821	CATC_MOUSE	Dipeptidyl peptidase 1	Ctsc	P97821	Mus musculus	T cell mediated cytotoxicity,proteolysis,apoptotic process,aging,response to organic substance,proteolysis involved in cellular protein catabolic process,positive regulation of proteolysis involved in cellular protein catabolic process,positive regulation of apoptotic signaling pathway	cysteine-type endopeptidase activity,serine-type endopeptidase activity,cysteine-type peptidase activity,peptidase activator activity involved in apoptotic process,phosphatase binding,chloride ion binding,identical protein binding,protein self-association,chaperone binding	extracellular space,nucleoplasm,lysosome,endoplasmic reticulum,Golgi apparatus,centrosome,membrane,intracellular membrane-bounded organelle,extracellular exosome	sp	1	1	uniprot_mouse_proteome	>sp|P97821|CATC_MOUSE Dipeptidyl peptidase 1 OS=Mus musculus GN=Ctsc PE=1 SV=1	5	7
TRUE	Old_Native / Young_Native	Old_Native	Young_Native	60	Q04997	3.15837e+06	1.83412e+06	-0.784093	0.784093	-41.9283	0.580717	0	2.6777e-11	5.14485e-10	59	0.133441	Q04997	INHA_MOUSE	Inhibin alpha chain	Inha	Q04997	Mus musculus	ovarian follicle development,male gonad development,regulation of receptor activity,positive regulation of pathway-restricted SMAD protein phosphorylation,BMP signaling pathway,regulation of cell proliferation,hemoglobin biosynthetic process,regulation of apoptotic process,regulation of MAPK cascade,negative regulation of follicle-stimulating hormone secretion,cell development,regulation of cell …	receptor binding,cytokine activity,transforming growth factor beta receptor binding,hormone activity,growth factor activity,inhibin binding,protein heterodimerization activity	photoreceptor outer segment,photoreceptor inner segment,extracellular space,cytoplasm,inhibin-betaglycan-ActRII complex,neuronal cell body,inhibin A complex,inhibin B complex	sp	1	2	uniprot_mouse_proteome	>sp|Q04997|INHA_MOUSE Inhibin alpha chain OS=Mus musculus GN=Inha PE=1 SV=2	7	12
TRUE	Old_Native / Young_Native	Old_Native	Young_Native	35	O70165	84065.3	316853	1.91423	1.91423	276.913	3.76913	0	3.64676e-11	6.83159e-10	34	0.212141	O70165	FCN1_MOUSE	Ficolin-1	Fcn1	O70165	Mus musculus	complement activation, lectin pathway,cell surface pattern recognition receptor signaling pathway,G-protein coupled receptor signaling pathway,positive regulation of interleukin-8 secretion	protein binding,signaling pattern recognition receptor activity,carbohydrate binding,metal ion binding,carbohydrate derivative binding	extracellular region,collagen trimer,extrinsic component of external side of plasma membrane	sp	1	1	uniprot_mouse_proteome	>sp|O70165|FCN1_MOUSE Ficolin-1 OS=Mus musculus GN=Fcn1 PE=1 SV=1	6	7
TRUE	Old_Native / Young_Native	Old_Native	Young_Native	130	P13864	559559	362136	-0.627759	0.627759	-35.2819	0.647181	0	3.73335e-11	6.93601e-10	129	0.161507	P13864	DNMT1_MOUSE	DNA (cytosine-5)-methyltransferase 1	Dnmt1	P13864	Mus musculus	negative regulation of transcription from RNA polymerase II promoter,chromatin silencing at rDNA,DNA methylation,transcription, DNA-templated,Ras protein signal transduction,maintenance of DNA methylation,regulation of gene expression,positive regulation of gene expression,gene silencing,chromatin modification,DNA methylation on cytosine,regulation of cell proliferation,DNA methylation involved i…	DNA binding,chromatin binding,RNA binding,DNA (cytosine-5-)-methyltransferase activity,protein binding,methyltransferase activity,zinc ion binding,methyl-CpG binding,DNA-methyltransferase activity,DNA (cytosine-5-)-methyltransferase activity, acting on CpG substrates,promoter-specific chromatin binding	heterochromatin,nucleus,nucleoplasm,replication fork,pericentric heterochromatin,cytoplasm	sp	1	5	uniprot_mouse_proteome	>sp|P13864|DNMT1_MOUSE DNA (cytosine-5)-methyltransferase 1 OS=Mus musculus GN=Dnmt1 PE=1 SV=5	25	26
TRUE	Old_Native / Young_Native	Old_Native	Young_Native	40	Q9R1E0	226589	98012.5	-1.20904	1.20904	-56.7445	0.432555	0	4.23144e-11	7.68931e-10	39	0.15658	Q9R1E0	FOXO1_MOUSE	Forkhead box protein O1	Foxo1	Q9R1E0	Mus musculus	negative regulation of transcription from RNA polymerase II promoter,blood vessel development,transcription, DNA-templated,regulation of transcription, DNA-templated,autophagy,apoptotic process,cellular response to DNA damage stimulus,insulin receptor signaling pathway,cellular response to starvation,anatomical structure morphogenesis,positive regulation of autophagy,cell differentiation,cellular…	transcription factor activity, transcription factor binding,transcriptional repressor activity, RNA polymerase II core promoter proximal region sequence-specific binding,transcription coactivator binding,transcriptional repressor activity, RNA polymerase II transcription regulatory region sequence-specific binding,DNA binding,transcription factor activity, sequence-specific DNA binding,protein bi…	nucleus,nucleoplasm,cytoplasm,cytosol	sp	1	2	uniprot_mouse_proteome	>sp|Q9R1E0|FOXO1_MOUSE Forkhead box protein O1 OS=Mus musculus GN=Foxo1 PE=1 SV=2	7	8
TRUE	Old_Native / Young_Native	Old_Native	Young_Native	45	E0CXN5;P13707	94260.4	297425	1.6578	1.6578	215.536	3.15536	0	8.95987e-11	1.52589e-09	44	0.25018	E0CXN5;P13707	E0CXN5_MOUSE;GPDA_MOUSE	Glycerol-3-phosphate dehydrogenase [NAD(+)];Glycerol-3-phosphate dehydrogenase [NAD(+)], cytoplasmic	Gpd1	E0CXN5;P13707	Mus musculus	;glycerol-3-phosphate metabolic process,gluconeogenesis,NADH oxidation,glycerophosphate shuttle,positive regulation of glycolytic process,glycerol-3-phosphate catabolic process,glycerolipid metabolic process,cellular response to cAMP,cellular response to tumor necrosis factor	;glycerol-3-phosphate dehydrogenase [NAD+] activity,glycerol-3-phosphate dehydrogenase activity,protein homodimerization activity,NAD binding	;mitochondrion,cytosol,glycerol-3-phosphate dehydrogenase complex,extracellular exosome	tr;sp	1	1;3	uniprot_mouse_proteome	>tr|E0CXN5|E0CXN5_MOUSE Glycerol-3-phosphate dehydrogenase [NAD(+)] OS=Mus musculus GN=Gpd1 PE=1 SV=1;>sp|P13707|GPDA_MOUSE Glycerol-3-phosphate dehydrogenase [NAD(+)], cytoplasmic OS=Mus musculus GN=Gpd1 PE=1 SV=3	9	9
TRUE	Old_Native / Young_Native	Old_Native	Young_Native	60	Q6P9K8;Q6P9K8-2	200859	348819	0.796299	0.796299	73.6641	1.73664	0	1.43941e-10	2.34479e-09	59	0.150658	Q6P9K8;Q6P9K8-2	CSKI1_MOUSE	Caskin-1;Isoform 2 of Caskin-1	Caskin1	Q6P9K8;Q6P9K8-2	Mus musculus	;	identical protein binding;	cytoplasm,membrane;	sp	1;	2;	uniprot_mouse_proteome	>sp|Q6P9K8|CSKI1_MOUSE Caskin-1 OS=Mus musculus GN=Caskin1 PE=1 SV=2;>sp|Q6P9K8-2|CSKI1_MOUSE Isoform 2 of Caskin-1 OS=Mus musculus GN=Caskin1	12	12
TRUE	Old_Native / Young_Native	Old_Native	Young_Native	30	P14602	182920	328831	0.846135	0.846135	79.7678	1.79768	0	1.48444e-10	2.40073e-09	29	0.0848566	P14602	HSPB1_MOUSE	Heat shock protein beta-1	Hspb1	P14602	Mus musculus	retina homeostasis,regulation of protein phosphorylation,negative regulation of protein kinase activity,response to unfolded protein,response to virus,positive regulation of interleukin-1 beta production,intracellular signal transduction,cellular response to vascular endothelial growth factor stimulus,positive regulation of endothelial cell chemotaxis by VEGF-activated vascular endothelial growth…	RNA binding,protein kinase C binding,protein kinase C inhibitor activity,protein kinase binding,identical protein binding,protein homodimerization activity,ubiquitin binding,protein binding involved in protein folding	proteasome complex,extracellular space,intracellular,nucleus,cytoplasm,spindle,plasma membrane,focal adhesion,Z disc,extracellular matrix,contractile fiber,extracellular exosome,axon cytoplasm	sp	1	3	uniprot_mouse_proteome	>sp|P14602|HSPB1_MOUSE Heat shock protein beta-1 OS=Mus musculus GN=Hspb1 PE=1 SV=3	5	6
TRUE	Old_Native / Young_Native	Old_Native	Young_Native	30	O89053	425058	644785	0.601157	0.601157	51.6933	1.51693	0	3.93162e-10	5.93173e-09	29	0.0613466	O89053	COR1A_MOUSE	Coronin-1A	Coro1a	O89053	Mus musculus	phagolysosome assembly,calcium ion transport,phagocytosis,actin filament organization,regulation of actin polymerization or depolymerization,regulation of cell shape,cell migration,actin cytoskeleton organization,positive regulation of cell migration,leukocyte chemotaxis,regulation of actin filament polymerization,negative regulation of vesicle fusion,cell-substrate adhesion,uropod organization,r…	RNA binding,actin binding,actin monomer binding,protein binding,protein C-terminus binding,cytoskeletal protein binding,myosin heavy chain binding,identical protein binding,protein homodimerization activity,phosphatidylinositol 3-kinase binding,actin filament binding	immunological synapse,phagocytic cup,cytoplasm,early endosome,cytosol,actin filament,plasma membrane,cell-cell junction,membrane,lamellipodium,axon,phagocytic vesicle membrane,cortical actin cytoskeleton,cell leading edge,protein complex,phagocytic vesicle,extracellular exosome,actin cytoskeleton	sp	1	5	uniprot_mouse_proteome	>sp|O89053|COR1A_MOUSE Coronin-1A OS=Mus musculus GN=Coro1a PE=1 SV=5	6	6
TRUE	Old_Native / Young_Native	Old_Native	Young_Native	55	P28654	1751556	3.44153e+06	0.974414	0.974414	96.4843	1.96484	0	4.69449e-10	7.03548e-09	54	0.129528	P28654	PGS2_MOUSE	Decorin	Dcn	P28654	Mus musculus	kidney development,placenta development,negative regulation of protein kinase activity,skeletal muscle tissue development,aging,response to mechanical stimulus,positive regulation of autophagy,negative regulation of endothelial cell migration,positive regulation of phosphatidylinositol 3-kinase signaling,positive regulation of macroautophagy,negative regulation of angiogenesis,cytokine-mediated s…	RNA binding,protein kinase inhibitor activity,collagen binding,glycosaminoglycan binding,protein N-terminus binding,extracellular matrix binding	proteinaceous extracellular matrix,collagen type VI trimer,extracellular space,cytoplasm,extracellular matrix	sp	1	1	uniprot_mouse_proteome	>sp|P28654|PGS2_MOUSE Decorin OS=Mus musculus GN=Dcn PE=1 SV=1	9	11
TRUE	Old_Native / Young_Native	Old_Native	Young_Native	40	Q9Z1T2	245591	94101	-1.38398	1.38398	-61.6839	0.383161	0	5.73231e-10	8.42237e-09	39	0.154456	Q9Z1T2	TSP4_MOUSE	Thrombospondin-4	Thbs4	Q9Z1T2	Mus musculus	positive regulation of endothelial cell proliferation,response to unfolded protein,regulation of receptor activity,negative regulation of angiogenesis,regulation of tissue remodeling,response to endoplasmic reticulum stress,behavioral response to pain,tissue remodeling,positive regulation of peptidyl-tyrosine phosphorylation,myoblast migration,positive regulation of cell division,endothelial cell…	integrin binding,calcium ion binding,protein binding,growth factor activity,heparin binding	basement membrane,extracellular space,endoplasmic reticulum,sarcoplasmic reticulum,extracellular matrix,extracellular exosome	sp	1	1	uniprot_mouse_proteome	>sp|Q9Z1T2|TSP4_MOUSE Thrombospondin-4 OS=Mus musculus GN=Thbs4 PE=1 SV=1	7	8
TRUE	Old_Native / Young_Native	Old_Native	Young_Native	55	E9Q718;Q9R0B9	416793	252365	-0.723815	0.723815	-39.4506	0.605494	0	1.33377e-09	1.78471e-08	54	0.107427	E9Q718;Q9R0B9	E9Q718_MOUSE;PLOD2_MOUSE	Procollagen-lysine,2-oxoglutarate 5-dioxygenase 2;Procollagen-lysine,2-oxoglutarate 5-dioxygenase 2	Plod2	E9Q718;Q9R0B9	Mus musculus	;peptidyl-lysine hydroxylation,hydroxylysine biosynthetic process,oxidation-reduction process	;iron ion binding,procollagen-lysine 5-dioxygenase activity,L-ascorbic acid binding	;rough endoplasmic reticulum membrane,extracellular exosome	tr;sp	1	1;2	uniprot_mouse_proteome	>tr|E9Q718|E9Q718_MOUSE Procollagen-lysine,2-oxoglutarate 5-dioxygenase 2 OS=Mus musculus GN=Plod2 PE=1 SV=1;>sp|Q9R0B9|PLOD2_MOUSE Procollagen-lysine,2-oxoglutarate 5-dioxygenase 2 OS=Mus musculus GN=Plod2 PE=1 SV=2	10	11
TRUE	Old_Native / Young_Native	Old_Native	Young_Native	25	A0A075B5P2;P01837	533566	2.46003e+06	2.20494	2.20494	361.054	4.61054	0	1.72937e-09	2.22983e-08	24	0.196212	A0A075B5P2;P01837	A0A075B5P2_MOUSE;IGKC_MOUSE	Protein Igkc (Fragment);Ig kappa chain C region	Igkc;	A0A075B5P2;P01837	Mus musculus	;phagocytosis, recognition,phagocytosis, engulfment,complement activation, classical pathway,B cell differentiation,defense response to bacterium,innate immune response,B cell receptor signaling pathway,positive regulation of B cell activation	;antigen binding,immunoglobulin receptor binding	;plasma membrane,external side of plasma membrane,immunoglobulin complex, circulating,blood microparticle	tr;sp	1	1	uniprot_mouse_proteome	>tr|A0A075B5P2|A0A075B5P2_MOUSE Protein Igkc (Fragment) OS=Mus musculus GN=Igkc PE=1 SV=1;>sp|P01837|IGKC_MOUSE Ig kappa chain C region OS=Mus musculus PE=1 SV=1	3	5
TRUE	Old_Native / Young_Native	Old_Native	Young_Native	105	P18242	13585147	20371252	0.584504	0.584504	49.9524	1.49952	0	2.13523e-09	2.65194e-08	104	0.0744209	P18242	CATD_MOUSE	Cathepsin D	Ctsd	P18242	Mus musculus	autophagosome assembly,proteolysis,protein catabolic process,epithelial tube branching involved in lung morphogenesis	aspartic-type endopeptidase activity,peptidase activity,hydrolase activity	extracellular space,mitochondrion,lysosome,melanosome,membrane raft,extracellular exosome,extracellular matrix	sp	1	1	uniprot_mouse_proteome	>sp|P18242|CATD_MOUSE Cathepsin D OS=Mus musculus GN=Ctsd PE=1 SV=1	11	21
TRUE	Old_Native / Young_Native	Old_Native	Young_Native	55	P16015	666593	1.20307e+06	0.851839	0.851839	80.48	1.8048	0	2.40519e-09	2.93852e-08	54	0.236263	P16015	CAH3_MOUSE	Carbonic anhydrase 3	Ca3	P16015	Mus musculus	one-carbon metabolic process,response to oxidative stress,dephosphorylation,response to ethanol	carbonate dehydratase activity,zinc ion binding,nickel cation binding,phosphatase activity	cytosol	sp	1	3	uniprot_mouse_proteome	>sp|P16015|CAH3_MOUSE Carbonic anhydrase 3 OS=Mus musculus GN=Ca3 PE=1 SV=3	9	11
TRUE	Old_Native / Young_Native	Old_Native	Young_Native	30	A0A0A0MQM7;O08746;O08746-2	78333.9	144002	0.878384	0.878384	83.8314	1.83831	0	3.66357e-09	4.40412e-08	29	0.115454	A0A0A0MQM7;O08746;O08746-2	A0A0A0MQM7_MOUSE;MATN2_MOUSE;MATN2_MOUSE	Matrilin-2;Matrilin-2;Isoform 2 of Matrilin-2	Matn2	A0A0A0MQM7;O08746;O08746-2	Mus musculus	;neuron migration,axon guidance,glial cell migration,dendrite regeneration,neuron projection development,response to axon injury;	;calcium ion binding;	;proteinaceous extracellular matrix,basement membrane,extracellular space,extracellular matrix;	tr;sp;sp	1;2;	1;2;	uniprot_mouse_proteome	>tr|A0A0A0MQM7|A0A0A0MQM7_MOUSE Matrilin-2 OS=Mus musculus GN=Matn2 PE=1 SV=1;>sp|O08746|MATN2_MOUSE Matrilin-2 OS=Mus musculus GN=Matn2 PE=2 SV=2;>sp|O08746-2|MATN2_MOUSE Isoform 2 of Matrilin-2 OS=Mus musculus GN=Matn2	6	6
TRUE	Old_Native / Young_Native	Old_Native	Young_Native	45	P49717	324322	144694	-1.16442	1.16442	-55.3857	0.446143	0	5.02871e-09	5.7972e-08	44	0.192566	P49717	MCM4_MOUSE	DNA replication licensing factor MCM4	Mcm4	P49717	Mus musculus	DNA unwinding involved in DNA replication,DNA replication initiation,cell cycle	single-stranded DNA binding,protein binding,ATP binding,DNA helicase activity,ATP-dependent DNA helicase activity	nuclear chromosome, telomeric region,nucleoplasm,membrane,MCM complex	sp	1	1	uniprot_mouse_proteome	>sp|P49717|MCM4_MOUSE DNA replication licensing factor MCM4 OS=Mus musculus GN=Mcm4 PE=1 SV=1	9	9
TRUE	Old_Native / Young_Native	Old_Native	Young_Native	75	Q61503	263456	727060	1.46451	1.46451	175.97	2.7597	0	6.31534e-09	7.17015e-08	74	0.298066	Q61503	5NTD_MOUSE	5'-nucleotidase	Nt5e	Q61503	Mus musculus	AMP catabolic process,leukocyte cell-cell adhesion,dephosphorylation,adenosine biosynthetic process,negative regulation of inflammatory response	nucleotide binding,5'-nucleotidase activity,metal ion binding	cytosol,plasma membrane,cell surface,membrane,anchored component of membrane,extracellular exosome	sp	1	2	uniprot_mouse_proteome	>sp|Q61503|5NTD_MOUSE 5'-nucleotidase OS=Mus musculus GN=Nt5e PE=1 SV=2	13	15
TRUE	Old_Native / Young_Native	Old_Native	Young_Native	25	Q07456	455506	703866	0.627831	0.627831	54.524	1.54524	0	7.38509e-09	8.30084e-08	24	0.0788703	Q07456	AMBP_MOUSE	Protein AMBP	Ambp	Q07456	Mus musculus	negative regulation of endopeptidase activity,protein-chromophore linkage,protein catabolic process,protein maturation	serine-type endopeptidase inhibitor activity,IgA binding,heme binding,small molecule binding,protein homodimerization activity	extracellular space,plasma membrane,cell surface,extracellular matrix,intracellular membrane-bounded organelle,extracellular exosome,blood microparticle	sp	1	2	uniprot_mouse_proteome	>sp|Q07456|AMBP_MOUSE Protein AMBP OS=Mus musculus GN=Ambp PE=1 SV=2	5	5
TRUE	Old_Native / Young_Native	Old_Native	Young_Native	30	Q9DCV7	58427.5	160002	1.45337	1.45337	173.846	2.73846	0	1.58637e-08	1.651e-07	29	0.224695	Q9DCV7	K2C7_MOUSE	Keratin, type II cytoskeletal 7	Krt7	Q9DCV7	Mus musculus		structural molecule activity,protein binding	nucleus,cytoplasm,keratin filament,extracellular exosome	sp	1	1	uniprot_mouse_proteome	>sp|Q9DCV7|K2C7_MOUSE Keratin, type II cytoskeletal 7 OS=Mus musculus GN=Krt7 PE=1 SV=1	6	6
TRUE	Old_Native / Young_Native	Old_Native	Young_Native	30	Q62469	78824.8	31635.1	-1.31712	1.31712	-59.8666	0.401334	0	1.63884e-08	1.69774e-07	29	0.1722	Q62469	ITA2_MOUSE	Integrin alpha-2	Itga2	Q62469	Mus musculus	response to hypoxia,positive regulation of leukocyte migration,substrate-dependent cell migration,hypotonic response,cell-matrix adhesion,integrin-mediated signaling pathway,female pregnancy,cell proliferation,positive regulation of epithelial cell migration,positive regulation of alkaline phosphatase activity,response to amine,response to muscle activity,positive regulation of smooth muscle cell…	beta-amyloid binding,integrin binding,collagen binding,protein complex binding,collagen receptor activity,laminin binding,metal ion binding,protein heterodimerization activity,collagen binding involved in cell-matrix adhesion	nucleus,plasma membrane,focal adhesion,external side of plasma membrane,cell surface,axon,integrin alpha2-beta1 complex,axon terminus,basal part of cell,perinuclear region of cytoplasm	sp	1	2	uniprot_mouse_proteome	>sp|Q62469|ITA2_MOUSE Integrin alpha-2 OS=Mus musculus GN=Itga2 PE=1 SV=2	6	6
TRUE	Old_Native / Young_Native	Old_Native	Young_Native	50	Q99K85	340431	192326	-0.823813	0.823813	-43.5053	0.564947	0	1.86122e-08	1.88469e-07	49	0.178424	Q99K85	SERC_MOUSE	Phosphoserine aminotransferase	Psat1	Q99K85	Mus musculus	L-serine biosynthetic process	O-phospho-L-serine:2-oxoglutarate aminotransferase activity	cytoplasm,cytosol,extracellular exosome	sp	1	1	uniprot_mouse_proteome	>sp|Q99K85|SERC_MOUSE Phosphoserine aminotransferase OS=Mus musculus GN=Psat1 PE=1 SV=1	9	10
TRUE	Old_Native / Young_Native	Old_Native	Young_Native	15	P01660	60032.6	330176	2.45942	2.45942	449.994	5.49994	0	1.87292e-08	1.88804e-07	14	0.207843	P01660	KV3A8_MOUSE	Ig kappa chain V-III region PC 3741/TEPC 111	NaN	P01660	Mus musculus		antigen binding		sp	1	1	uniprot_mouse_proteome	>sp|P01660|KV3A8_MOUSE Ig kappa chain V-III region PC 3741/TEPC 111 OS=Mus musculus PE=1 SV=1	2	3
TRUE	Old_Native / Young_Native	Old_Native	Young_Native	50	Q99LJ6	897054	593921	-0.594924	0.594924	-33.7921	0.662079	0	2.13062e-08	2.12872e-07	49	0.0859453	Q99LJ6	GPX7_MOUSE	Glutathione peroxidase 7	Gpx7	Q99LJ6	Mus musculus	response to oxidative stress,oxidation-reduction process,cellular oxidant detoxification	catalase activity,peroxidase activity,glutathione peroxidase activity	extracellular region,endoplasmic reticulum	sp	1	1	uniprot_mouse_proteome	>sp|Q99LJ6|GPX7_MOUSE Glutathione peroxidase 7 OS=Mus musculus GN=Gpx7 PE=1 SV=1	9	10
TRUE	Old_Native / Young_Native	Old_Native	Young_Native	40	A0A067XG53;O70589;O70589-3;O70589-4;O70589-5	246376	388180	0.655866	0.655866	57.5562	1.57556	0	2.51861e-08	2.48134e-07	39	0.102776	A0A067XG53;O70589;O70589-3;O70589-4;O70589-5	A0A067XG53_MOUSE;CSKP_MOUSE;CSKP_MOUSE;CSKP_MOUSE;CSKP_MOUSE	Peripheral plasma membrane protein CASK (Fragment);Peripheral plasma membrane protein CASK;Isoform 3 of Peripheral plasma membrane protein CASK;Isoform 4 of Peripheral plasma membrane protein CASK;Isoform 5 of Peripheral plasma membrane protein CASK	Cask	A0A067XG53;O70589;O70589-3;O70589-4;O70589-5	Mus musculus	;negative regulation of cell-matrix adhesion,protein phosphorylation,negative regulation of keratinocyte proliferation,positive regulation of transcription from RNA polymerase II promoter,negative regulation of wound healing,calcium ion import,positive regulation of calcium ion import,negative regulation of cellular response to growth factor stimulus;;;	;protein serine/threonine kinase activity,protein binding,calmodulin binding,ATP binding,neurexin family protein binding;;;	;basement membrane,nucleus,nuclear lamina,nucleolus,cytoplasm,cytosol,cell-cell junction,focal adhesion,membrane,basolateral plasma membrane,nuclear matrix,vesicle,synapse;;;	tr;sp;sp;sp;sp	1;1;;;	1;2;;;	uniprot_mouse_proteome	>tr|A0A067XG53|A0A067XG53_MOUSE Peripheral plasma membrane protein CASK (Fragment) OS=Mus musculus GN=Cask PE=1 SV=1;>sp|O70589|CSKP_MOUSE Peripheral plasma membrane protein CASK OS=Mus musculus GN=Cask PE=1 SV=2;>sp|O70589-3|CSKP_MOUSE Isoform 3 of Peripheral plasma membrane protein CASK OS=Mus musculus GN=Cask;>sp|O70589-4|CSKP_MOUSE Isoform 4 of Peripheral plasma membrane protein CASK OS=Mus m…	8	8
TRUE	Old_Native / Young_Native	Old_Native	Young_Native	25	Q9QZZ6	121373	332336	1.4532	1.4532	173.815	2.73815	0	4.6024e-08	4.38398e-07	24	0.260167	Q9QZZ6	DERM_MOUSE	Dermatopontin	Dpt	Q9QZZ6	Mus musculus	cell adhesion,negative regulation of cell proliferation,collagen fibril organization	molecular_function	proteinaceous extracellular matrix,extracellular space,extracellular matrix,extracellular exosome	sp	1	1	uniprot_mouse_proteome	>sp|Q9QZZ6|DERM_MOUSE Dermatopontin OS=Mus musculus GN=Dpt PE=1 SV=1	5	5
TRUE	Old_Native / Young_Native	Old_Native	Young_Native	35	Q91X76	262299	127427	-1.04154	1.04154	-51.4192	0.485808	0	4.81631e-08	4.56838e-07	34	0.168612	Q91X76	Q91X76_MOUSE	5'-nucleotidase domain containing 2	Nt5dc2	Q91X76	Mus musculus	dephosphorylation	5'-nucleotidase activity,metal ion binding	cellular_component	tr	1	1	uniprot_mouse_proteome	>tr|Q91X76|Q91X76_MOUSE 5'-nucleotidase domain containing 2 OS=Mus musculus GN=Nt5dc2 PE=1 SV=1	7	7
TRUE	Old_Native / Young_Native	Old_Native	Young_Native	20	Q80W85	295049	67647	-2.12486	2.12486	-77.0726	0.229274	0	4.8979e-08	4.6069e-07	19	0.267642	Q80W85	NPM2_MOUSE	Nucleoplasmin-2	Npm2	Q80W85	Mus musculus	chromatin remodeling,regulation of exit from mitosis,single fertilization,embryo development,oocyte differentiation,chromatin modification,positive regulation of catalytic activity,positive regulation of DNA replication,positive regulation of meiotic nuclear division,protein homooligomerization	chromatin binding,enzyme binding	cytoplasmic chromatin,nuclear chromatin,nucleus	sp	2	1	uniprot_mouse_proteome	>sp|Q80W85|NPM2_MOUSE Nucleoplasmin-2 OS=Mus musculus GN=Npm2 PE=2 SV=1	4	4
TRUE	Old_Native / Young_Native	Old_Native	Young_Native	90	P28653	2565991	4.05957e+06	0.661812	0.661812	58.2068	1.58207	0	6.36158e-08	5.78981e-07	89	0.0877388	P28653	PGS1_MOUSE	Biglycan	Bgn	P28653	Mus musculus	blood vessel remodeling,negative regulation of protein kinase activity,cytokine-mediated signaling pathway,peptide cross-linking via chondroitin 4-sulfate glycosaminoglycan,negative regulation of JAK-STAT cascade	protein kinase inhibitor activity,glycosaminoglycan binding,extracellular matrix binding	proteinaceous extracellular matrix,extracellular space,intracellular,cytoplasm,cell surface,transport vesicle,extracellular matrix,sarcolemma,extracellular exosome	sp	1	1	uniprot_mouse_proteome	>sp|P28653|PGS1_MOUSE Biglycan OS=Mus musculus GN=Bgn PE=1 SV=1	13	18
TRUE	Old_Native / Young_Native	Old_Native	Young_Native	40	P28867;P28867-2	418071	260217	-0.684029	0.684029	-37.7575	0.622425	0	7.8092e-08	6.91145e-07	39	0.122976	P28867;P28867-2	KPCD_MOUSE	Protein kinase C delta type;Isoform 2 of Protein kinase C delta type	Prkcd	P28867;P28867-2	Mus musculus	protein phosphorylation,apoptotic process,cell cycle,immunoglobulin mediated immune response,histone phosphorylation,peptidyl-serine phosphorylation,peptidyl-threonine phosphorylation,peptidyl-tyrosine phosphorylation,termination of signal transduction,negative regulation of actin filament polymerization,positive regulation of endodeoxyribonuclease activity,activation of protein kinase activity,i…	protein kinase activity,protein serine/threonine kinase activity,protein kinase C activity,calcium-independent protein kinase C activity,non-membrane spanning protein tyrosine kinase activity,protein binding,ATP binding,enzyme activator activity,enzyme binding,kinase binding,protein kinase binding,insulin receptor substrate binding,metal ion binding;	nucleus,cytoplasm,endoplasmic reticulum,cytosol,plasma membrane,cell-cell junction,membrane,nuclear matrix,perinuclear region of cytoplasm,extracellular exosome;	sp	1;	3;	uniprot_mouse_proteome	>sp|P28867|KPCD_MOUSE Protein kinase C delta type OS=Mus musculus GN=Prkcd PE=1 SV=3;>sp|P28867-2|KPCD_MOUSE Isoform 2 of Protein kinase C delta type OS=Mus musculus GN=Prkcd	8	8
TRUE	Old_Native / Young_Native	Old_Native	Young_Native	45	P49182	304724	552598	0.858725	0.858725	81.3435	1.81344	0	1.20974e-07	1.03798e-06	44	0.127681	P49182	HEP2_MOUSE	Heparin cofactor 2	Serpind1	P49182	Mus musculus	blood coagulation,negative regulation of endopeptidase activity	serine-type endopeptidase inhibitor activity,heparin binding	extracellular space,extracellular exosome	sp	1	1	uniprot_mouse_proteome	>sp|P49182|HEP2_MOUSE Heparin cofactor 2 OS=Mus musculus GN=Serpind1 PE=1 SV=1	7	9
TRUE	Old_Native / Young_Native	Old_Native	Young_Native	35	D3Z1Z8;D3Z5N2;P54227	1909919	988239	-0.95058	0.95058	-48.2575	0.517425	0	1.33473e-07	1.13654e-06	34	0.147253	D3Z1Z8;D3Z5N2;P54227	D3Z1Z8_MOUSE;D3Z5N2_MOUSE;STMN1_MOUSE	Stathmin (Fragment);Stathmin;Stathmin	Stmn1	D3Z1Z8;D3Z5N2;P54227	Mus musculus	;;mitotic cytokinesis,microtubule depolymerization,mitotic spindle organization,axonogenesis,brain development,response to virus,regulation of microtubule polymerization or depolymerization,negative regulation of microtubule polymerization,negative regulation of Rho protein signal transduction,hepatocyte growth factor receptor signaling pathway,positive regulation of cellular component movement,n…	;;protein binding,tubulin binding	;;intracellular,cytoplasm,cytosol,microtubule,membrane,neuron projection,extracellular exosome	tr;tr;sp	1	1;1;2	uniprot_mouse_proteome	>tr|D3Z1Z8|D3Z1Z8_MOUSE Stathmin (Fragment) OS=Mus musculus GN=Stmn1 PE=1 SV=1;>tr|D3Z5N2|D3Z5N2_MOUSE Stathmin OS=Mus musculus GN=Stmn1 PE=1 SV=1;>sp|P54227|STMN1_MOUSE Stathmin OS=Mus musculus GN=Stmn1 PE=1 SV=2	5	7
TRUE	Old_Native / Young_Native	Old_Native	Young_Native	30	P41317	430668	958003	1.15345	1.15345	122.446	2.22446	0	1.48067e-07	1.25605e-06	29	0.164195	P41317	MBL2_MOUSE	Mannose-binding protein C	Mbl2	P41317	Mus musculus	complement activation, lectin pathway,complement activation, classical pathway,negative regulation of growth of symbiont in host,innate immune response,negative regulation of viral process,positive regulation of phagocytosis,defense response to Gram-positive bacterium,killing by host of symbiont cells	receptor binding,calcium ion binding,mannose binding,calcium-dependent protein binding	collagen trimer,extracellular space	sp	1	2	uniprot_mouse_proteome	>sp|P41317|MBL2_MOUSE Mannose-binding protein C OS=Mus musculus GN=Mbl2 PE=1 SV=2	6	6
TRUE	Old_Native / Young_Native	Old_Native	Young_Native	10	P06800;P06800-2;P06800-3;S4R1M0;S4R1S4;S4R2V1	10988.8	29386.8	1.41914	1.41914	167.426	2.67426	0	1.75308e-07	1.46503e-06	9	0.112123	P06800;P06800-2;P06800-3;S4R1M0;S4R1S4;S4R2V1	PTPRC_MOUSE;PTPRC_MOUSE;PTPRC_MOUSE;S4R1M0_MOUSE;S4R1S4_MOUSE;S4R2V1_MOUSE	Receptor-type tyrosine-protein phosphatase C;Isoform 2 of Receptor-type tyrosine-protein phosphatase C;Isoform 3 of Receptor-type tyrosine-protein phosphatase C;Receptor-type tyrosine-protein phosphatase C;Receptor-type tyrosine-protein phosphatase C;Protein tyrosine phosphatase, receptor type, C, isoform CRA_b	Ptprc	P06800;P06800-2;P06800-3;S4R1M0;S4R1S4;S4R2V1	Mus musculus	activation of MAPK activity,negative regulation of T cell mediated cytotoxicity,positive regulation of T cell mediated cytotoxicity,negative regulation of cytokine-mediated signaling pathway,hematopoietic progenitor cell differentiation,immunoglobulin biosynthetic process,positive regulation of T cell mediated immunity,regulation of humoral immune response mediated by circulating immunoglobulin,p…	protein tyrosine phosphatase activity,protein binding,heparin binding,protein kinase binding,identical protein binding,heparan sulfate proteoglycan binding;;;;;	plasma membrane,integral component of plasma membrane,focal adhesion,external side of plasma membrane,cell surface,membrane,membrane raft,extracellular exosome,cell periphery;;;;;	sp;sp;sp;tr;tr;tr	1;;;1;1;1	3;;;1;1;1	uniprot_mouse_proteome	>sp|P06800|PTPRC_MOUSE Receptor-type tyrosine-protein phosphatase C OS=Mus musculus GN=Ptprc PE=1 SV=3;>sp|P06800-2|PTPRC_MOUSE Isoform 2 of Receptor-type tyrosine-protein phosphatase C OS=Mus musculus GN=Ptprc;>sp|P06800-3|PTPRC_MOUSE Isoform 3 of Receptor-type tyrosine-protein phosphatase C OS=Mus musculus GN=Ptprc;>tr|S4R1M0|S4R1M0_MOUSE Receptor-type tyrosine-protein phosphatase C OS=Mus musc…	2	2
TRUE	Old_Native / Young_Native	Old_Native	Young_Native	30	O88508	105999	59337.1	-0.83705	0.83705	-44.0213	0.559787	0	1.88503e-07	1.55792e-06	29	0.151476	O88508	DNM3A_MOUSE	DNA (cytosine-5)-methyltransferase 3A	Dnmt3a	O88508	Mus musculus	negative regulation of transcription from RNA polymerase II promoter,mitotic cell cycle,DNA methylation,methylation-dependent chromatin silencing,regulation of gene expression by genetic imprinting,transcription, DNA-templated,spermatogenesis,aging,response to toxic substance,response to ionizing radiation,response to lead ion,positive regulation of cell death,neuron differentiation,response to e…	DNA binding,chromatin binding,DNA (cytosine-5-)-methyltransferase activity,protein binding,methyltransferase activity,identical protein binding,metal ion binding,DNA (cytosine-5-)-methyltransferase activity, acting on CpN substrates	chromosome, centromeric region,euchromatin,heterochromatin,XY body,nucleus,nucleoplasm,nuclear heterochromatin,cytoplasm,nuclear matrix	sp	1	2	uniprot_mouse_proteome	>sp|O88508|DNM3A_MOUSE DNA (cytosine-5)-methyltransferase 3A OS=Mus musculus GN=Dnmt3a PE=1 SV=2	6	6
TRUE	Old_Native / Young_Native	Old_Native	Young_Native	35	Q62009;Q62009-2;Q62009-3;Q62009-4;Q62009-5	110931	214243	0.949581	0.949581	93.1312	1.93131	0	2.03919e-07	1.65491e-06	34	0.159642	Q62009;Q62009-2;Q62009-3;Q62009-4;Q62009-5	POSTN_MOUSE	Periostin;Isoform 2 of Periostin;Isoform 3 of Periostin;Isoform 4 of Periostin;Isoform 5 of Periostin	Postn	Q62009;Q62009-2;Q62009-3;Q62009-4;Q62009-5	Mus musculus	response to hypoxia,negative regulation of cell-matrix adhesion,regulation of systemic arterial blood pressure,cell adhesion,regulation of Notch signaling pathway,response to mechanical stimulus,tissue development,response to muscle activity,positive regulation of smooth muscle cell migration,extracellular matrix organization,response to estradiol,cellular response to fibroblast growth factor sti…	heparin binding,metal ion binding;;;;	proteinaceous extracellular matrix,extracellular space,trans-Golgi network,extracellular matrix,neuromuscular junction;;;;	sp	1;;;;	2;;;;	uniprot_mouse_proteome	>sp|Q62009|POSTN_MOUSE Periostin OS=Mus musculus GN=Postn PE=1 SV=2;>sp|Q62009-2|POSTN_MOUSE Isoform 2 of Periostin OS=Mus musculus GN=Postn;>sp|Q62009-3|POSTN_MOUSE Isoform 3 of Periostin OS=Mus musculus GN=Postn;>sp|Q62009-4|POSTN_MOUSE Isoform 4 of Periostin OS=Mus musculus GN=Postn;>sp|Q62009-5|POSTN_MOUSE Isoform 5 of Periostin OS=Mus musculus GN=Postn	7	7
TRUE	Old_Native / Young_Native	Old_Native	Young_Native	20	Q8BVA0;Q99P91	72061.2	281301	1.96482	1.96482	290.364	3.90364	0	2.09058e-07	1.69051e-06	19	0.314614	Q8BVA0;Q99P91	Q8BVA0_MOUSE;GPNMB_MOUSE	Transmembrane glycoprotein NMB	Gpnmb	Q8BVA0;Q99P91	Mus musculus	;osteoblast differentiation,negative regulation of cytokine production,positive regulation of protein phosphorylation,cell adhesion,signal transduction,cell-cell signaling,regulation of receptor activity,bone mineralization,positive regulation of cell migration,positive regulation of protein autophosphorylation,negative regulation of tumor necrosis factor production,regulation of tissue remodelin…	;integrin binding,heparin binding,syndecan binding,receptor agonist activity	;integral component of plasma membrane,endomembrane system,integral component of membrane,cytoplasmic vesicle membrane,cytoplasmic vesicle,melanosome	tr;sp	1	1;2	uniprot_mouse_proteome	>tr|Q8BVA0|Q8BVA0_MOUSE Transmembrane glycoprotein NMB OS=Mus musculus GN=Gpnmb PE=1 SV=1;>sp|Q99P91|GPNMB_MOUSE Transmembrane glycoprotein NMB OS=Mus musculus GN=Gpnmb PE=1 SV=2	3	4
TRUE	Old_Native / Young_Native	Old_Native	Young_Native	75	P70441	1.11914e+06	1.69635e+06	0.600042	0.600042	51.5761	1.51576	0	2.13732e-07	1.72211e-06	74	0.114402	P70441	NHRF1_MOUSE	Na(+)/H(+) exchange regulatory cofactor NHE-RF1	Slc9a3r1	P70441	Mus musculus	renal sodium ion transport,nuclear migration,adenylate cyclase-activating dopamine receptor signaling pathway,sensory perception of sound,negative regulation of cell proliferation,regulation of cell shape,regulation of cell size,negative regulation of platelet-derived growth factor receptor signaling pathway,negative regulation of sodium ion transport,negative regulation of phosphatidylinositol 3…	receptor binding,protein binding,beta-catenin binding,chloride channel regulator activity,phosphatase binding,PDZ domain binding,beta-2 adrenergic receptor binding,protein complex binding,protein complex scaffold,protein self-association,myosin II binding,dopamine receptor binding,growth factor receptor binding	ruffle,cytoplasm,microvillus,endomembrane system,membrane,apical plasma membrane,filopodium,brush border membrane,microvillus membrane,vesicle,stereocilium,stereocilium tip,membrane raft,apical part of cell,perinuclear region of cytoplasm,extracellular exosome,cell periphery,sperm midpiece	sp	1	3	uniprot_mouse_proteome	>sp|P70441|NHRF1_MOUSE Na(+)/H(+) exchange regulatory cofactor NHE-RF1 OS=Mus musculus GN=Slc9a3r1 PE=1 SV=3	13	15
TRUE	Old_Native / Young_Native	Old_Native	Young_Native	95	Q9DBC7	1278894	1.93972e+06	0.60095	0.60095	51.6715	1.51672	0	2.37551e-07	1.88034e-06	94	0.129392	Q9DBC7	KAP0_MOUSE	cAMP-dependent protein kinase type I-alpha regulatory subunit	Prkar1a	Q9DBC7	Mus musculus	mesoderm formation,protein phosphorylation,negative regulation of protein kinase activity,female meiotic division,heart development,cell proliferation,animal organ morphogenesis,sarcomere organization,negative regulation of meiotic nuclear division,negative regulation of activated T cell proliferation,cardiac muscle cell proliferation,negative regulation of cAMP-dependent protein kinase activity	cAMP-dependent protein kinase inhibitor activity,protein binding,cAMP-dependent protein kinase regulator activity,protein domain specific binding,cAMP binding,ubiquitin protein ligase binding,protein kinase A catalytic subunit binding	cytoplasm,axoneme,cAMP-dependent protein kinase complex,membrane,nucleotide-activated protein kinase complex,neuromuscular junction,protein complex,plasma membrane raft,immunological synapse	sp	1	3	uniprot_mouse_proteome	>sp|Q9DBC7|KAP0_MOUSE cAMP-dependent protein kinase type I-alpha regulatory subunit OS=Mus musculus GN=Prkar1a PE=1 SV=3	16	19
TRUE	Old_Native / Young_Native	Old_Native	Young_Native	45	Q9JJF0	403202	236782	-0.76794	0.76794	-41.2745	0.587255	0	4.51543e-07	3.40627e-06	44	0.160135	Q9JJF0	NP1L5_MOUSE	Nucleosome assembly protein 1-like 5	Nap1l5	Q9JJF0	Mus musculus	nucleosome assembly,biological_process	molecular_function	cellular_component,nucleus	sp	1	1	uniprot_mouse_proteome	>sp|Q9JJF0|NP1L5_MOUSE Nucleosome assembly protein 1-like 5 OS=Mus musculus GN=Nap1l5 PE=1 SV=1	5	9
TRUE	Old_Native / Young_Native	Old_Native	Young_Native	75	P17918	2.57582e+06	1.57316e+06	-0.711366	0.711366	-38.9259	0.610741	0	6.12887e-07	4.49101e-06	74	0.161387	P17918	PCNA_MOUSE	Proliferating cell nuclear antigen	Pcna	P17918	Mus musculus	negative regulation of transcription from RNA polymerase II promoter,leading strand elongation,base-excision repair, gap-filling,mismatch repair,translesion synthesis,replication fork processing,positive regulation of deoxyribonuclease activity,cellular response to UV,positive regulation of DNA repair,positive regulation of DNA replication,cellular response to xenobiotic stimulus,mitotic telomere…	purine-specific mismatch base pair DNA N-glycosylase activity,chromatin binding,damaged DNA binding,protein binding,enzyme binding,DNA polymerase processivity factor activity,receptor tyrosine kinase binding,dinucleotide insertion or deletion binding,MutLalpha complex binding,histone acetyltransferase binding,identical protein binding,DNA polymerase binding	cyclin-dependent protein kinase holoenzyme complex,nuclear chromosome, telomeric region,intracellular,nucleus,nuclear lamina,nucleoplasm,replication fork,centrosome,nuclear body,nuclear replication fork,PCNA complex,extracellular exosome,PCNA-p21 complex	sp	1	2	uniprot_mouse_proteome	>sp|P17918|PCNA_MOUSE Proliferating cell nuclear antigen OS=Mus musculus GN=Pcna PE=1 SV=2	11	15
TRUE	Old_Native / Young_Native	Old_Native	Young_Native	75	Q61753	1.39661e+06	928232	-0.589371	0.589371	-33.5367	0.664633	0	6.18699e-07	4.50108e-06	74	0.156457	Q61753	SERA_MOUSE	D-3-phosphoglycerate dehydrogenase	Phgdh	Q61753	Mus musculus	glutamine metabolic process,glycine metabolic process,L-serine metabolic process,L-serine biosynthetic process,threonine metabolic process,gamma-aminobutyric acid metabolic process,regulation of gene expression,taurine metabolic process,spinal cord development,glial cell development,neural tube development,neurogenesis,neuron projection development,oxidation-reduction process,G1 to G0 transition	phosphoglycerate dehydrogenase activity,NAD binding	myelin sheath,extracellular exosome	sp	1	3	uniprot_mouse_proteome	>sp|Q61753|SERA_MOUSE D-3-phosphoglycerate dehydrogenase OS=Mus musculus GN=Phgdh PE=1 SV=3	12	15
TRUE	Old_Native / Young_Native	Old_Native	Young_Native	35	G3X8X6;Q62230	111150	179554	0.691917	0.691917	61.5428	1.61543	0	6.31014e-07	4.57587e-06	34	0.132974	G3X8X6;Q62230	G3X8X6_MOUSE;SN_MOUSE	Sialic acid binding Ig-like lectin 1, sialoadhesin, isoform CRA_b;Sialoadhesin	Siglec1	G3X8X6;Q62230	Mus musculus	;endocytosis,cell adhesion,positive regulation of T cell apoptotic process,positive regulation of extrinsic apoptotic signaling pathway	;protein binding,carbohydrate binding	;extracellular region,plasma membrane,integral component of membrane	tr;sp	1	1;2	uniprot_mouse_proteome	>tr|G3X8X6|G3X8X6_MOUSE Sialic acid binding Ig-like lectin 1, sialoadhesin, isoform CRA_b OS=Mus musculus GN=Siglec1 PE=1 SV=1;>sp|Q62230|SN_MOUSE Sialoadhesin OS=Mus musculus GN=Siglec1 PE=1 SV=2	7	7
TRUE	Old_Native / Young_Native	Old_Native	Young_Native	20	E9PXM9	173171	47785.2	-1.85756	1.85756	-72.4057	0.275943	0	7.36706e-07	5.24087e-06	19	0.313798	E9PXM9	E9PXM9_MOUSE	Protein Fbxw24	Fbxw24	E9PXM9	Mus musculus	biological_process	molecular_function	cellular_component	tr	4	1	uniprot_mouse_proteome	>tr|E9PXM9|E9PXM9_MOUSE Protein Fbxw24 OS=Mus musculus GN=Fbxw24 PE=4 SV=1	4	4
TRUE	Old_Native / Young_Native	Old_Native	Young_Native	30	P01878	205663	395900	0.944854	0.944854	92.4994	1.92499	0	7.81408e-07	5.5066e-06	29	0.308381	P01878	IGHA_MOUSE	Ig alpha chain C region	NaN	P01878	Mus musculus		antigen binding,immunoglobulin receptor binding		sp	1	1	uniprot_mouse_proteome	>sp|P01878|IGHA_MOUSE Ig alpha chain C region OS=Mus musculus PE=1 SV=1	5	6
TRUE	Old_Native / Young_Native	Old_Native	Young_Native	35	P11440	315302	143508	-1.13561	1.13561	-54.4856	0.455144	0	9.07671e-07	6.27829e-06	34	0.195271	P11440	CDK1_MOUSE	Cyclin-dependent kinase 1	Cdk1	P11440	Mus musculus	regulation of transcription involved in G1/S transition of mitotic cell cycle,microtubule cytoskeleton organization,DNA repair,protein complex assembly,protein phosphorylation,apoptotic process,mitotic G2 DNA damage checkpoint,cell aging,cell proliferation,response to toxic substance,regulation of gene expression,positive regulation of gene expression,positive regulation of G2/M transition of mit…	chromatin binding,protein kinase activity,protein serine/threonine kinase activity,cyclin-dependent protein serine/threonine kinase activity,protein binding,ATP binding,RNA polymerase II carboxy-terminal domain kinase activity,kinase activity,cyclin binding,Hsp70 protein binding,histone kinase activity,cyclin-dependent protein kinase activity	cyclin-dependent protein kinase holoenzyme complex,nuclear chromosome, telomeric region,nucleus,nucleoplasm,centrosome,cytosol,spindle microtubule,membrane,midbody,extracellular exosome,mitotic spindle,cyclin B1-CDK1 complex,mitochondrial matrix	sp	1	3	uniprot_mouse_proteome	>sp|P11440|CDK1_MOUSE Cyclin-dependent kinase 1 OS=Mus musculus GN=Cdk1 PE=1 SV=3	7	7
TRUE	Old_Native / Young_Native	Old_Native	Young_Native	15	Q9CRB1	55168.3	161815	1.55244	1.55244	193.312	2.93312	0	1.0931e-06	7.33519e-06	14	0.187149	Q9CRB1	Q9CRB1_MOUSE	Galectin	Lgals7	Q9CRB1	Mus musculus				tr	1	1	uniprot_mouse_proteome	>tr|Q9CRB1|Q9CRB1_MOUSE Galectin OS=Mus musculus GN=Lgals7 PE=1 SV=1	3	3
TRUE	Old_Native / Young_Native	Old_Native	Young_Native	35	P19001	83915.9	245481	1.54859	1.54859	192.532	2.92532	0	1.10924e-06	7.42134e-06	34	0.418361	P19001	K1C19_MOUSE	Keratin, type I cytoskeletal 19	Krt19	P19001	Mus musculus	Notch signaling pathway,response to estrogen,sarcomere organization,cell differentiation involved in embryonic placenta development	protein binding,structural constituent of muscle,protein complex binding	intermediate filament,plasma membrane,dystrophin-associated glycoprotein complex,apicolateral plasma membrane,Z disc,sarcolemma,costamere,extracellular exosome,cell periphery,terminal web	sp	1	1	uniprot_mouse_proteome	>sp|P19001|K1C19_MOUSE Keratin, type I cytoskeletal 19 OS=Mus musculus GN=Krt19 PE=1 SV=1	7	7
TRUE	Old_Native / Young_Native	Old_Native	Young_Native	30	P04117	73286.1	622091	3.08551	3.08551	748.852	8.48852	0	1.34651e-06	8.7484e-06	29	0.82392	P04117	FABP4_MOUSE	Fatty acid-binding protein, adipocyte	Fabp4	P04117	Mus musculus	cytokine production,negative regulation of protein kinase activity,transport,cholesterol homeostasis,negative regulation of transcription, DNA-templated,positive regulation of inflammatory response,white fat cell differentiation,brown fat cell differentiation,cellular response to lithium ion,cellular response to tumor necrosis factor	transporter activity,fatty acid binding	nucleoplasm,cytoplasm,extracellular exosome	sp	1	3	uniprot_mouse_proteome	>sp|P04117|FABP4_MOUSE Fatty acid-binding protein, adipocyte OS=Mus musculus GN=Fabp4 PE=1 SV=3	6	6
TRUE	Old_Native / Young_Native	Old_Native	Young_Native	20	Q99KG5;Q99KG5-2;Q99KG5-3	50113.2	96807.9	0.949936	0.949936	93.1787	1.93179	0	1.37269e-06	8.89282e-06	19	0.152561	Q99KG5;Q99KG5-2;Q99KG5-3	LSR_MOUSE	Lipolysis-stimulated lipoprotein receptor;Isoform 2 of Lipolysis-stimulated lipoprotein receptor;Isoform 3 of Lipolysis-stimulated lipoprotein receptor	Lsr	Q99KG5;Q99KG5-2;Q99KG5-3	Mus musculus	liver development,receptor-mediated endocytosis,regulation of lipid metabolic process,low-density lipoprotein particle clearance,very-low-density lipoprotein particle clearance,lipoprotein transport,establishment of blood-brain barrier,Requires Ontology,tricellular tight junction assembly;;	protein binding,low-density lipoprotein particle binding,lipoprotein particle receptor activity;;	plasma membrane,integral component of membrane,very-low-density lipoprotein particle,low-density lipoprotein particle,chylomicron,tricellular tight junction,extracellular exosome;;	sp	1;;	1;;	uniprot_mouse_proteome	>sp|Q99KG5|LSR_MOUSE Lipolysis-stimulated lipoprotein receptor OS=Mus musculus GN=Lsr PE=1 SV=1;>sp|Q99KG5-2|LSR_MOUSE Isoform 2 of Lipolysis-stimulated lipoprotein receptor OS=Mus musculus GN=Lsr;>sp|Q99KG5-3|LSR_MOUSE Isoform 3 of Lipolysis-stimulated lipoprotein receptor OS=Mus musculus GN=Lsr	4	4
TRUE	Old_Native / Young_Native	Old_Native	Young_Native	20	Q9CRY7	229598	146334	-0.649846	0.649846	-36.2652	0.637348	0	2.29333e-06	1.43605e-05	19	0.0898332	Q9CRY7	GDPD1_MOUSE	Glycerophosphodiester phosphodiesterase domain-containing protein 1	Gdpd1	Q9CRY7	Mus musculus	phospholipid metabolic process,glycerophospholipid catabolic process,N-acylethanolamine metabolic process	lysophospholipase activity,phosphoric diester hydrolase activity,metal ion binding,alkylglycerophosphoethanolamine phosphodiesterase activity	endoplasmic reticulum membrane,membrane,integral component of membrane,perinuclear region of cytoplasm	sp	1	1	uniprot_mouse_proteome	>sp|Q9CRY7|GDPD1_MOUSE Glycerophosphodiester phosphodiesterase domain-containing protein 1 OS=Mus musculus GN=Gdpd1 PE=1 SV=1	4	4
TRUE	Old_Native / Young_Native	Old_Native	Young_Native	40	Q61646	33959.2	209144	2.62262	2.62262	515.869	6.15869	0	2.80167e-06	1.7022e-05	39	0.462444	Q61646	HPT_MOUSE	Haptoglobin	Hp	Q61646	Mus musculus	immune system process,acute-phase response,Notch signaling pathway,positive regulation of cell death,response to hydrogen peroxide,defense response to bacterium,negative regulation of oxidoreductase activity,cellular oxidant detoxification,negative regulation of hydrogen peroxide catabolic process	antioxidant activity,hemoglobin binding	extracellular space,haptoglobin-hemoglobin complex,extracellular exosome,blood microparticle	sp	1	1	uniprot_mouse_proteome	>sp|Q61646|HPT_MOUSE Haptoglobin OS=Mus musculus GN=Hp PE=1 SV=1	8	8
TRUE	Old_Native / Young_Native	Old_Native	Young_Native	35	G3UYY1;G3UZ26;P50431	619664	414516	-0.580061	0.580061	-33.1064	0.668936	0	2.90698e-06	1.7473e-05	34	0.107221	G3UYY1;G3UZ26;P50431	G3UYY1_MOUSE;G3UZ26_MOUSE;GLYC_MOUSE	Serine hydroxymethyltransferase (Fragment);Serine hydroxymethyltransferase (Fragment);Serine hydroxymethyltransferase, cytosolic	Shmt1	G3UYY1;G3UZ26;P50431	Mus musculus	;;dTMP biosynthetic process,glycine metabolic process,L-serine metabolic process,L-serine catabolic process,one-carbon metabolic process,purine nucleobase biosynthetic process,negative regulation of translation,glycine biosynthetic process from serine,tetrahydrofolate interconversion,tetrahydrofolate metabolic process,folic acid metabolic process,protein tetramerization,protein homotetramerizatio…	;;translation repressor activity, nucleic acid binding,glycine hydroxymethyltransferase activity,L-allo-threonine aldolase activity,pyridoxal phosphate binding,identical protein binding,protein homodimerization activity,mRNA 5'-UTR binding,serine binding	;;nucleus,mitochondrion,cytosol,extracellular exosome	tr;tr;sp	1	1;1;3	uniprot_mouse_proteome	>tr|G3UYY1|G3UYY1_MOUSE Serine hydroxymethyltransferase (Fragment) OS=Mus musculus GN=Shmt1 PE=1 SV=1;>tr|G3UZ26|G3UZ26_MOUSE Serine hydroxymethyltransferase (Fragment) OS=Mus musculus GN=Shmt1 PE=1 SV=1;>sp|P50431|GLYC_MOUSE Serine hydroxymethyltransferase, cytosolic OS=Mus musculus GN=Shmt1 PE=1 SV=3	7	7
TRUE	Old_Native / Young_Native	Old_Native	Young_Native	205	Q99N16	6324372	13815383	1.12728	1.12728	118.447	2.18447	0	3.375e-06	1.99658e-05	204	0.216105	Q99N16	CP4F3_MOUSE	Leukotriene-B(4) omega-hydroxylase 2	Cyp4f3	Q99N16	Mus musculus	very long-chain fatty acid metabolic process,long-chain fatty acid metabolic process,regulation of blood pressure,drug metabolic process,arachidonic acid metabolic process,epoxygenase P450 pathway,negative regulation of icosanoid secretion,positive regulation of icosanoid secretion,leukotriene B4 catabolic process,vitamin E metabolic process,menaquinone catabolic process,phylloquinone catabolic p…	iron ion binding,arachidonic acid epoxygenase activity,oxidoreductase activity, acting on paired donors, with incorporation or reduction of molecular oxygen, NAD(P)H as one donor, and incorporation of one atom of oxygen,alkane 1-monooxygenase activity,heme binding,leukotriene-B4 20-monooxygenase activity,arachidonic acid omega-hydroxylase activity,alpha-tocopherol omega-hydroxylase activity,tocot…	cytoplasm,endoplasmic reticulum membrane,integral component of membrane,apical plasma membrane,organelle membrane,intracellular membrane-bounded organelle	sp	1	2	uniprot_mouse_proteome	>sp|Q99N16|CP4F3_MOUSE Leukotriene-B(4) omega-hydroxylase 2 OS=Mus musculus GN=Cyp4f3 PE=1 SV=2	24	41
TRUE	Old_Native / Young_Native	Old_Native	Young_Native	75	Q06890	1.68707e+06	2.57705e+06	0.611196	0.611196	52.7525	1.52753	0	3.80704e-06	2.23452e-05	74	0.112499	Q06890	CLUS_MOUSE	Clusterin	Clu	Q06890	Mus musculus	cell morphogenesis,microglial cell activation,response to virus,protein import,central nervous system myelin maintenance,positive regulation of proteasomal ubiquitin-dependent protein catabolic process,negative regulation of protein homooligomerization,positive regulation of protein homooligomerization,positive regulation of tumor necrosis factor production,positive regulation of apoptotic proces…	beta-amyloid binding,protein binding,ubiquitin protein ligase binding,protein complex binding,low-density lipoprotein particle receptor binding,misfolded protein binding,ATPase activity	extracellular space,nucleus,cytoplasm,mitochondrion,endoplasmic reticulum,cytosol,cell surface,extracellular matrix,mitochondrial membrane,spherical high-density lipoprotein particle,chromaffin granule,protein complex,perinuclear region of cytoplasm,extracellular exosome,blood microparticle,neurofibrillary tangle,apical dendrite,cell periphery	sp	1	1	uniprot_mouse_proteome	>sp|Q06890|CLUS_MOUSE Clusterin OS=Mus musculus GN=Clu PE=1 SV=1	11	15
TRUE	Old_Native / Young_Native	Old_Native	Young_Native	15	A0A0G2JEK2;P63254	268866	414624	0.624916	0.624916	54.2121	1.54212	0	3.83805e-06	2.24478e-05	14	0.097348	A0A0G2JEK2;P63254	A0A0G2JEK2_MOUSE;CRIP1_MOUSE	Cysteine-rich protein 1	Crip1	A0A0G2JEK2;P63254	Mus musculus	;intrinsic apoptotic signaling pathway in response to DNA damage,response to zinc ion,cellular response to antibiotic,cellular response to UV-B	;AT DNA binding,zinc ion binding,DNA binding, bending,peptide binding	;cytoplasm	tr;sp	1	1;2	uniprot_mouse_proteome	>tr|A0A0G2JEK2|A0A0G2JEK2_MOUSE Cysteine-rich protein 1 OS=Mus musculus GN=Crip1 PE=1 SV=1;>sp|P63254|CRIP1_MOUSE Cysteine-rich protein 1 OS=Mus musculus GN=Crip1 PE=1 SV=2	2	3
TRUE	Old_Native / Young_Native	Old_Native	Young_Native	10	A0A075B5T5	52731.6	290625	2.46242	2.46242	451.14	5.5114	0	4.33988e-06	2.50155e-05	9	0.256198	A0A075B5T5	A0A075B5T5_MOUSE	Protein Ighv1-5	Ighv1-5	A0A075B5T5	Mus musculus				tr	4	1	uniprot_mouse_proteome	>tr|A0A075B5T5|A0A075B5T5_MOUSE Protein Ighv1-5 OS=Mus musculus GN=Ighv1-5 PE=4 SV=1	2	2
TRUE	Old_Native / Young_Native	Old_Native	Young_Native	25	P29351;P29351-2;P29351-3	112782	173521	0.621581	0.621581	53.8561	1.53856	0	4.99573e-06	2.85672e-05	24	0.113113	P29351;P29351-2;P29351-3	PTN6_MOUSE	Tyrosine-protein phosphatase non-receptor type 6;Isoform 2 of Tyrosine-protein phosphatase non-receptor type 6;Isoform 3 of Tyrosine-protein phosphatase non-receptor type 6	Ptpn6	P29351;P29351-2;P29351-3	Mus musculus	hematopoietic progenitor cell differentiation,negative regulation of humoral immune response mediated by circulating immunoglobulin,protein dephosphorylation,cell proliferation,positive regulation of cell proliferation,positive regulation of phosphatidylinositol 3-kinase signaling,peptidyl-tyrosine phosphorylation,cytokine-mediated signaling pathway,cell differentiation,platelet formation,abortiv…	phosphotyrosine binding,protein tyrosine phosphatase activity,transmembrane receptor protein tyrosine phosphatase activity,protein binding,SH3 domain binding,protein kinase binding,SH2 domain binding,cell adhesion molecule binding;;	nucleus,nucleolus,cytoplasm,cytosol,cell-cell junction,alpha-beta T cell receptor complex,protein complex,extracellular exosome;;	sp	1;;	2;;	uniprot_mouse_proteome	>sp|P29351|PTN6_MOUSE Tyrosine-protein phosphatase non-receptor type 6 OS=Mus musculus GN=Ptpn6 PE=1 SV=2;>sp|P29351-2|PTN6_MOUSE Isoform 2 of Tyrosine-protein phosphatase non-receptor type 6 OS=Mus musculus GN=Ptpn6;>sp|P29351-3|PTN6_MOUSE Isoform 3 of Tyrosine-protein phosphatase non-receptor type 6 OS=Mus musculus GN=Ptpn6	5	5
TRUE	Old_Native / Young_Native	Old_Native	Young_Native	25	A2A6J4;A2A6J7;P19973;P19973-2	84226.1	138740	0.720049	0.720049	64.7238	1.64724	0	6.40012e-06	3.56125e-05	24	0.137713	A2A6J4;A2A6J7;P19973;P19973-2	A2A6J4_MOUSE;A2A6J7_MOUSE;LSP1_MOUSE;LSP1_MOUSE	Lymphocyte-specific protein 1;Lymphocyte-specific protein 1;Lymphocyte-specific protein 1;Isoform 2 of Lymphocyte-specific protein 1	Lsp1	A2A6J4;A2A6J7;P19973;P19973-2	Mus musculus	;;apoptotic process,chemotaxis,defense response,cytoskeleton organization,signal transduction;	;;actin binding,signal transducer activity;	;;plasma membrane,membrane,extracellular exosome;	tr;tr;sp;sp	1;1;1;	1;1;2;	uniprot_mouse_proteome	>tr|A2A6J4|A2A6J4_MOUSE Lymphocyte-specific protein 1 OS=Mus musculus GN=Lsp1 PE=1 SV=1;>tr|A2A6J7|A2A6J7_MOUSE Lymphocyte-specific protein 1 OS=Mus musculus GN=Lsp1 PE=1 SV=1;>sp|P19973|LSP1_MOUSE Lymphocyte-specific protein 1 OS=Mus musculus GN=Lsp1 PE=1 SV=2;>sp|P19973-2|LSP1_MOUSE Isoform 2 of Lymphocyte-specific protein 1 OS=Mus musculus GN=Lsp1	5	5
TRUE	Old_Native / Young_Native	Old_Native	Young_Native	15	Q9CWE6	616563	94576.4	-2.70469	2.70469	-84.6607	0.153393	0	7.18442e-06	3.97797e-05	14	0.385324	Q9CWE6	OOEP_MOUSE	Oocyte-expressed protein homolog	Ooep	Q9CWE6	Mus musculus	in utero embryonic development,protein phosphorylation,embryo implantation,fertilization,embryonic pattern specification,establishment or maintenance of apical/basal cell polarity,cellular protein complex assembly	RNA binding,protein binding	cell cortex,protein complex,apical part of cell	sp	1	1	uniprot_mouse_proteome	>sp|Q9CWE6|OOEP_MOUSE Oocyte-expressed protein homolog OS=Mus musculus GN=Ooep PE=1 SV=1	3	3
TRUE	Old_Native / Young_Native	Old_Native	Young_Native	120	Q64133	8859912	14031617	0.663317	0.663317	58.372	1.58372	0	7.71042e-06	4.21728e-05	119	0.162848	Q64133	AOFA_MOUSE	Amine oxidase [flavin-containing] A	Maoa	Q64133	Mus musculus	neurotransmitter catabolic process,dopamine catabolic process,oxidation-reduction process	protein binding,primary amine oxidase activity	mitochondrion,mitochondrial outer membrane,integral component of membrane	sp	1	3	uniprot_mouse_proteome	>sp|Q64133|AOFA_MOUSE Amine oxidase [flavin-containing] A OS=Mus musculus GN=Maoa PE=1 SV=3	19	24
TRUE	Old_Native / Young_Native	Old_Native	Young_Native	50	P43275	4483292	2.14632e+06	-1.06269	1.06269	-52.1263	0.478737	0	8.31634e-06	4.52667e-05	49	0.283394	P43275	H11_MOUSE	Histone H1.1	Hist1h1a	P43275	Mus musculus	nucleosome assembly,spermatogenesis,positive regulation of receptor-mediated endocytosis	DNA binding,protein binding,heparin binding,chromatin DNA binding	nucleosome,nucleus,nuclear euchromatin,cell surface,vesicle	sp	1	2	uniprot_mouse_proteome	>sp|P43275|H11_MOUSE Histone H1.1 OS=Mus musculus GN=Hist1h1a PE=1 SV=2	6	10
TRUE	Old_Native / Young_Native	Old_Native	Young_Native	15	Q8C2W8	85370.6	24856.2	-1.78013	1.78013	-70.8843	0.291157	0	9.07574e-06	4.90439e-05	14	0.284611	Q8C2W8	Q8C2W8_MOUSE	Protein Fbxw19	Fbxw19	Q8C2W8	Mus musculus	biological_process	molecular_function	cellular_component	tr	2	1	uniprot_mouse_proteome	>tr|Q8C2W8|Q8C2W8_MOUSE Protein Fbxw19 OS=Mus musculus GN=Fbxw19 PE=2 SV=1	3	3
TRUE	Old_Native / Young_Native	Old_Native	Young_Native	25	E9QAF9;Q0VGY8	125909	81499.8	-0.627512	0.627512	-35.2708	0.647292	0	1.20895e-05	6.3796e-05	24	0.131343	E9QAF9;Q0VGY8	E9QAF9_MOUSE;TANC1_MOUSE	Protein TANC1	Tanc1	E9QAF9;Q0VGY8	Mus musculus	;myoblast fusion,visual learning,dendritic spine maintenance	;molecular_function	;postsynaptic density,cell junction,dendrite,neuronal cell body,axon terminus,postsynaptic membrane	tr;sp	1	1;2	uniprot_mouse_proteome	>tr|E9QAF9|E9QAF9_MOUSE Protein TANC1 OS=Mus musculus GN=Tanc1 PE=1 SV=1;>sp|Q0VGY8|TANC1_MOUSE Protein TANC1 OS=Mus musculus GN=Tanc1 PE=1 SV=2	5	5
TRUE	Old_Native / Young_Native	Old_Native	Young_Native	15	P01644;P01645	155464	403076	1.37448	1.37448	159.274	2.59274	0	1.27332e-05	6.70355e-05	14	0.207954	P01644;P01645	KV5AB_MOUSE;KV5AC_MOUSE	Ig kappa chain V-V region HP R16.7;Ig kappa chain V-V region HP 93G7	NaN	P01644;P01645	Mus musculus	;	antigen binding;antigen binding	;	sp	1	1	uniprot_mouse_proteome	>sp|P01644|KV5AB_MOUSE Ig kappa chain V-V region HP R16.7 OS=Mus musculus PE=1 SV=1;>sp|P01645|KV5AC_MOUSE Ig kappa chain V-V region HP 93G7 OS=Mus musculus PE=1 SV=1	3	3
TRUE	Old_Native / Young_Native	Old_Native	Young_Native	10	A0A075B5M7	10949.5	102569	3.22765	3.22765	836.739	9.36739	0	1.28071e-05	6.71104e-05	9	0.395482	A0A075B5M7	A0A075B5M7_MOUSE	Protein Igkv5-39	Igkv5-39	A0A075B5M7	Mus musculus				tr	1	7	uniprot_mouse_proteome	>tr|A0A075B5M7|A0A075B5M7_MOUSE Protein Igkv5-39 OS=Mus musculus GN=Igkv5-39 PE=1 SV=7	2	2
TRUE	Old_Native / Young_Native	Old_Native	Young_Native	10	A0A075B5K8;A0A0B4J1I0;A0A140T8M0;A0A140T8N1;F6XWB2;P01631	117206	444585	1.92341	1.92341	279.319	3.79319	0	1.36785e-05	7.10147e-05	9	0.231561	A0A075B5K8;A0A0B4J1I0;A0A140T8M0;A0A140T8N1;F6XWB2;P01631	A0A075B5K8_MOUSE;A0A0B4J1I0_MOUSE;A0A140T8M0_MOUSE;A0A140T8N1_MOUSE;F6XWB2_MOUSE;KV2A7_MOUSE	Protein Igkv1-99;Protein Igkv1-110 (Fragment);Protein Igkv1-117 (Fragment);Protein Igkv1-88 (Fragment);Protein Igkv1-99 (Fragment);Ig kappa chain V-II region 26-10	Igkv1-99;Igkv1-110;Igkv1-117;Igkv1-88;Igkv1-99;	A0A075B5K8;A0A0B4J1I0;A0A140T8M0;A0A140T8N1;F6XWB2;P01631	Mus musculus	;immunoglobulin production,immune response;;;immunoglobulin production,immune response;	;;;;;antigen binding	;extracellular space;;;extracellular space;	tr;tr;tr;tr;tr;sp	4;4;4;4;4;1	7;5;2;2;5;1	uniprot_mouse_proteome	>tr|A0A075B5K8|A0A075B5K8_MOUSE Protein Igkv1-99 OS=Mus musculus GN=Igkv1-99 PE=4 SV=7;>tr|A0A0B4J1I0|A0A0B4J1I0_MOUSE Protein Igkv1-110 (Fragment) OS=Mus musculus GN=Igkv1-110 PE=4 SV=5;>tr|A0A140T8M0|A0A140T8M0_MOUSE Protein Igkv1-117 (Fragment) OS=Mus musculus GN=Igkv1-117 PE=4 SV=2;>tr|A0A140T8N1|A0A140T8N1_MOUSE Protein Igkv1-88 (Fragment) OS=Mus musculus GN=Igkv1-88 PE=4 SV=2;>tr|F6XWB2|F6X…	2	2
TRUE	Old_Native / Young_Native	Old_Native	Young_Native	25	P30115	302533	523531	0.791182	0.791182	73.0491	1.73049	0	1.51443e-05	7.68498e-05	24	0.136375	P30115	GSTA3_MOUSE	Glutathione S-transferase A3	Gsta3	P30115	Mus musculus	ureteric bud development,glutathione metabolic process,aflatoxin catabolic process	glutathione transferase activity	cytosol,extracellular exosome	sp	1	2	uniprot_mouse_proteome	>sp|P30115|GSTA3_MOUSE Glutathione S-transferase A3 OS=Mus musculus GN=Gsta3 PE=1 SV=2	4	5
TRUE	Old_Native / Young_Native	Old_Native	Young_Native	30	P51661	351243	200098	-0.811763	0.811763	-43.0315	0.569685	0	1.60524e-05	8.07288e-05	29	0.137734	P51661	DHI2_MOUSE	Corticosteroid 11-beta-dehydrogenase isozyme 2	Hsd11b2	P51661	Mus musculus	response to hypoxia,regulation of blood volume by renal aldosterone,female pregnancy,glucocorticoid metabolic process,response to food,response to insulin,response to drug,response to glucocorticoid,oxidation-reduction process	11-beta-hydroxysteroid dehydrogenase [NAD(P)] activity,steroid binding,NAD binding	endoplasmic reticulum	sp	1	2	uniprot_mouse_proteome	>sp|P51661|DHI2_MOUSE Corticosteroid 11-beta-dehydrogenase isozyme 2 OS=Mus musculus GN=Hsd11b2 PE=1 SV=2	6	6
TRUE	Old_Native / Young_Native	Old_Native	Young_Native	35	F6ZBR8	67322.1	44509.9	-0.596952	0.596952	-33.8851	0.661149	0	1.60902e-05	8.07384e-05	34	0.185414	F6ZBR8	F6ZBR8_MOUSE	Protein Wiz (Fragment)	Wiz	F6ZBR8	Mus musculus				tr	1	1	uniprot_mouse_proteome	>tr|F6ZBR8|F6ZBR8_MOUSE Protein Wiz (Fragment) OS=Mus musculus GN=Wiz PE=1 SV=1	7	7
TRUE	Old_Native / Young_Native	Old_Native	Young_Native	20	Q01320	95704.3	37807.2	-1.33992	1.33992	-60.4959	0.395041	0	2.63197e-05	0.000124701	19	0.230666	Q01320	TOP2A_MOUSE	DNA topoisomerase 2-alpha	Top2a	Q01320	Mus musculus	resolution of meiotic recombination intermediates,sister chromatid segregation,hematopoietic progenitor cell differentiation,DNA topological change,DNA ligation,cellular response to DNA damage stimulus,chromosome segregation,chromosome condensation,apoptotic chromosome condensation,embryonic cleavage,regulation of circadian rhythm,positive regulation of apoptotic process,mitotic DNA integrity che…	magnesium ion binding,DNA binding,chromatin binding,RNA binding,DNA topoisomerase type II (ATP-hydrolyzing) activity,protein kinase C binding,protein binding,ATP binding,protein C-terminus binding,DNA-dependent ATPase activity,drug binding,DNA binding, bending,enzyme binding,protein homodimerization activity,histone deacetylase binding,ubiquitin binding,protein heterodimerization activity	condensed chromosome,nucleus,nucleoplasm,nucleolus,DNA topoisomerase complex (ATP-hydrolyzing),intracellular ribonucleoprotein complex,protein complex,nuclear chromosome,centriole	sp	1	2	uniprot_mouse_proteome	>sp|Q01320|TOP2A_MOUSE DNA topoisomerase 2-alpha OS=Mus musculus GN=Top2a PE=1 SV=2	4	4
TRUE	Old_Native / Young_Native	Old_Native	Young_Native	20	F6WR04;O70370	180513	331407	0.876499	0.876499	83.5914	1.83591	0	2.9958e-05	0.000138857	19	0.189225	F6WR04;O70370	F6WR04_MOUSE;CATS_MOUSE	Cathepsin S	Ctss	F6WR04;O70370	Mus musculus	;proteolysis,immune response,response to acidic pH,protein processing,antigen processing and presentation,collagen catabolic process,basement membrane disassembly,antigen processing and presentation of peptide antigen,positive regulation of inflammatory response,proteolysis involved in cellular protein catabolic process,positive regulation of cation channel activity	;fibronectin binding,cysteine-type endopeptidase activity,collagen binding,peptidase activity,laminin binding,proteoglycan binding	;extracellular space,lysosome,membrane,early endosome lumen,intracellular membrane-bounded organelle	tr;sp	1	1;2	uniprot_mouse_proteome	>tr|F6WR04|F6WR04_MOUSE Cathepsin S OS=Mus musculus GN=Ctss PE=1 SV=1;>sp|O70370|CATS_MOUSE Cathepsin S OS=Mus musculus GN=Ctss PE=1 SV=2	4	4
TRUE	Old_Native / Young_Native	Old_Native	Young_Native	45	A0A140T8V1;P11404	1.62543e+06	935572	-0.796898	0.796898	-42.4415	0.575585	0	3.29555e-05	0.000149062	44	0.165739	A0A140T8V1;P11404	A0A140T8V1_MOUSE;FABPH_MOUSE	Protein Fabp3-ps1;Fatty acid-binding protein, heart	Fabp3-ps1;Fabp3	A0A140T8V1;P11404	Mus musculus	;fatty acid metabolic process,response to insulin,response to drug,cholesterol homeostasis,long-chain fatty acid import,regulation of fatty acid oxidation,phospholipid homeostasis,response to fatty acid,positive regulation of phospholipid biosynthetic process,regulation of phosphatidylcholine biosynthetic process	;long-chain fatty acid transporter activity,cytoskeletal protein binding,long-chain fatty acid binding,icosatetraenoic acid binding,oleic acid binding	;extracellular space,cytosol,sarcoplasm,extracellular exosome	tr;sp	3;1	1;5	uniprot_mouse_proteome	>tr|A0A140T8V1|A0A140T8V1_MOUSE Protein Fabp3-ps1 OS=Mus musculus GN=Fabp3-ps1 PE=3 SV=1;>sp|P11404|FABPH_MOUSE Fatty acid-binding protein, heart OS=Mus musculus GN=Fabp3 PE=1 SV=5	7	9
TRUE	Old_Native / Young_Native	Old_Native	Young_Native	60	Q8CHR6	184016	344056	0.902814	0.902814	86.9709	1.86971	0	3.41309e-05	0.000153452	59	0.276402	Q8CHR6	DPYD_MOUSE	Dihydropyrimidine dehydrogenase [NADP(+)]	Dpyd	Q8CHR6	Mus musculus	purine nucleobase catabolic process,pyrimidine nucleobase catabolic process,thymine catabolic process,uracil catabolic process,thymidine catabolic process,beta-alanine biosynthetic process,oxidation-reduction process	nucleotide binding,dihydropyrimidine dehydrogenase (NADP+) activity,protein homodimerization activity,metal ion binding,4 iron, 4 sulfur cluster binding	cytoplasm,cytosol	sp	1	1	uniprot_mouse_proteome	>sp|Q8CHR6|DPYD_MOUSE Dihydropyrimidine dehydrogenase [NADP(+)] OS=Mus musculus GN=Dpyd PE=1 SV=1	11	12
TRUE	Old_Native / Young_Native	Old_Native	Young_Native	60	Q9Z1N6	1.16963e+06	1.92171e+06	0.716336	0.716336	64.3004	1.643	0	3.91755e-05	0.000172341	59	0.189252	Q9Z1N6	SFRP4_MOUSE	Secreted frizzled-related sequence protein 4	Sfrp4	Q9Z1N6	Mus musculus	positive regulation of receptor internalization,G-protein coupled receptor signaling pathway,negative regulation of cell proliferation,positive regulation of gene expression,Wnt signaling pathway,cell differentiation,regulation of BMP signaling pathway,positive regulation of apoptotic process,negative regulation of sequence-specific DNA binding transcription factor activity,positive regulation of…	G-protein coupled receptor activity,Wnt-protein binding,Wnt-activated receptor activity	extracellular space,nucleus,cytoplasm,cell surface,integral component of membrane	sp	2	1	uniprot_mouse_proteome	>sp|Q9Z1N6|SFRP4_MOUSE Secreted frizzled-related sequence protein 4 OS=Mus musculus GN=Sfrp4 PE=2 SV=1	8	12
TRUE	Old_Native / Young_Native	Old_Native	Young_Native	20	A2ARG6;Q6HA09;Q6HA09-2	295998	174058	-0.766018	0.766018	-41.1962	0.588038	0	4.40929e-05	0.000188802	19	0.305024	A2ARG6;Q6HA09;Q6HA09-2	A2ARG6_MOUSE;ASTL_MOUSE;ASTL_MOUSE	Metalloendopeptidase (Fragment);Astacin-like metalloendopeptidase;Isoform 2 of Astacin-like metalloendopeptidase	Astl	A2ARG6;Q6HA09;Q6HA09-2	Mus musculus	;proteolysis,cell adhesion,fertilization,positive regulation of protein processing,prevention of polyspermy,negative regulation of binding of sperm to zona pellucida;	;metalloendopeptidase activity,protein binding,peptidase activity,zinc ion binding,aspartic-type peptidase activity,glutamic-type peptidase activity;	;cytoplasm,plasma membrane,transport vesicle,cortical granule;	tr;sp;sp	3;1;	1;3;	uniprot_mouse_proteome	>tr|A2ARG6|A2ARG6_MOUSE Metalloendopeptidase (Fragment) OS=Mus musculus GN=Astl PE=3 SV=1;>sp|Q6HA09|ASTL_MOUSE Astacin-like metalloendopeptidase OS=Mus musculus GN=Astl PE=1 SV=3;>sp|Q6HA09-2|ASTL_MOUSE Isoform 2 of Astacin-like metalloendopeptidase OS=Mus musculus GN=Astl	4	4
TRUE	Old_Native / Young_Native	Old_Native	Young_Native	65	A0A1D5RLL3;Q8BG67;Q8BG67-2	847799	1.27514e+06	0.588858	0.588858	50.4056	1.50406	0	5.05362e-05	0.00021195	64	0.10267	A0A1D5RLL3;Q8BG67;Q8BG67-2	A0A1D5RLL3_MOUSE;EFR3A_MOUSE;EFR3A_MOUSE	Protein EFR3 homolog A;Protein EFR3 homolog A;Isoform 2 of Protein EFR3 homolog A	Efr3a	A0A1D5RLL3;Q8BG67;Q8BG67-2	Mus musculus	;protein localization to plasma membrane,cell-cell adhesion;	;protein homodimerization activity;	;cornified envelope,intracellular,cytosol,plasma membrane,extracellular exosome;	tr;sp;sp	4;1;	1;1;	uniprot_mouse_proteome	>tr|A0A1D5RLL3|A0A1D5RLL3_MOUSE Protein EFR3 homolog A OS=Mus musculus GN=Efr3a PE=4 SV=1;>sp|Q8BG67|EFR3A_MOUSE Protein EFR3 homolog A OS=Mus musculus GN=Efr3a PE=1 SV=1;>sp|Q8BG67-2|EFR3A_MOUSE Isoform 2 of Protein EFR3 homolog A OS=Mus musculus GN=Efr3a	13	13
TRUE	Old_Native / Young_Native	Old_Native	Young_Native	10	A2AIJ1;P40237	30474.8	57042.9	0.904431	0.904431	87.1806	1.87181	0	6.28377e-05	0.000254063	9	0.136434	A2AIJ1;P40237	A2AIJ1_MOUSE;CD82_MOUSE	Tetraspanin (Fragment);CD82 antigen	Cd82	A2AIJ1;P40237	Mus musculus	;cell surface receptor signaling pathway	;	;integral component of plasma membrane,extracellular exosome	tr;sp	1	1	uniprot_mouse_proteome	>tr|A2AIJ1|A2AIJ1_MOUSE Tetraspanin (Fragment) OS=Mus musculus GN=Cd82 PE=1 SV=1;>sp|P40237|CD82_MOUSE CD82 antigen OS=Mus musculus GN=Cd82 PE=1 SV=1	2	2
TRUE	Old_Native / Young_Native	Old_Native	Young_Native	15	P31532	55061.2	112048	1.02501	1.02501	103.497	2.03497	0	6.33123e-05	0.000255065	14	0.230595	P31532	SAA4_MOUSE	Serum amyloid A-4 protein	Saa4	P31532	Mus musculus	acute-phase response,positive chemotaxis,cell chemotaxis	chemoattractant activity	extracellular space,high-density lipoprotein particle,extracellular exosome	sp	1	2	uniprot_mouse_proteome	>sp|P31532|SAA4_MOUSE Serum amyloid A-4 protein OS=Mus musculus GN=Saa4 PE=1 SV=2	3	3
TRUE	Old_Native / Young_Native	Old_Native	Young_Native	15	A2ATU9;Q8BY71	103030	53972.2	-0.932778	0.932778	-47.6151	0.523849	0	6.37997e-05	0.000256568	14	0.155157	A2ATU9;Q8BY71	A2ATU9_MOUSE;HAT1_MOUSE	Histone acetyltransferase type B catalytic subunit	Hat1	A2ATU9;Q8BY71	Mus musculus	;DNA replication-dependent nucleosome assembly,DNA replication-independent nucleosome assembly,chromatin silencing at telomere,response to nutrient,histone H4 acetylation	;H4 histone acetyltransferase activity,histone binding	;nuclear chromosome, telomeric region,nuclear chromatin,nucleoplasm,nuclear matrix,intracellular membrane-bounded organelle,protein complex	tr;sp	1	1	uniprot_mouse_proteome	>tr|A2ATU9|A2ATU9_MOUSE Histone acetyltransferase type B catalytic subunit OS=Mus musculus GN=Hat1 PE=1 SV=1;>sp|Q8BY71|HAT1_MOUSE Histone acetyltransferase type B catalytic subunit OS=Mus musculus GN=Hat1 PE=1 SV=1	3	3
TRUE	Old_Native / Young_Native	Old_Native	Young_Native	15	E9PYB0;F7CVJ5;F7DBB3	257612	500357	0.95776	0.95776	94.2291	1.94229	0	6.83886e-05	0.000272632	14	0.177261	E9PYB0;F7CVJ5;F7DBB3	E9PYB0_MOUSE;F7CVJ5_MOUSE;F7DBB3_MOUSE	Protein Ahnak2 (Fragment)	Ahnak2	E9PYB0;F7CVJ5;F7DBB3	Mus musculus	plasma membrane repair;;	molecular_function;;	cytosol,plasma membrane,Z disc,cytoplasmic vesicle membrane,costamere,T-tubule;;	tr	1	8;1;1	uniprot_mouse_proteome	>tr|E9PYB0|E9PYB0_MOUSE Protein Ahnak2 (Fragment) OS=Mus musculus GN=Ahnak2 PE=1 SV=8;>tr|F7CVJ5|F7CVJ5_MOUSE Protein Ahnak2 (Fragment) OS=Mus musculus GN=Ahnak2 PE=1 SV=1;>tr|F7DBB3|F7DBB3_MOUSE Protein Ahnak2 (Fragment) OS=Mus musculus GN=Ahnak2 PE=1 SV=1	3	3
TRUE	Old_Native / Young_Native	Old_Native	Young_Native	15	P52293	74984.8	23717.2	-1.66066	1.66066	-68.3706	0.316294	0	7.16857e-05	0.000283215	14	0.298975	P52293	IMA1_MOUSE	Importin subunit alpha-1	Kpna2	P52293	Mus musculus	protein import into nucleus,NLS-bearing protein import into nucleus	RNA binding,protein binding,nuclear localization sequence binding,protein transporter activity,histone deacetylase binding,repressing transcription factor binding	nuclear pore,nucleoplasm,cytosol,membrane	sp	1	2	uniprot_mouse_proteome	>sp|P52293|IMA1_MOUSE Importin subunit alpha-1 OS=Mus musculus GN=Kpna2 PE=1 SV=2	3	3
TRUE	Old_Native / Young_Native	Old_Native	Young_Native	20	A0A0B4J1H7	66413.9	168052	1.33935	1.33935	153.037	2.53037	0	9.02355e-05	0.000346159	19	0.340077	A0A0B4J1H7	A0A0B4J1H7_MOUSE	Protein Igkv1-135 (Fragment)	Igkv1-135	A0A0B4J1H7	Mus musculus	immunoglobulin production,immune response		extracellular space	tr	4	1	uniprot_mouse_proteome	>tr|A0A0B4J1H7|A0A0B4J1H7_MOUSE Protein Igkv1-135 (Fragment) OS=Mus musculus GN=Igkv1-135 PE=4 SV=1	4	4
TRUE	Old_Native / Young_Native	Old_Native	Young_Native	35	P06684	71961.2	113708	0.660048	0.660048	58.0135	1.58014	0	0.000109909	0.000411791	34	0.162733	P06684	CO5_MOUSE	Complement C5	C5	P06684	Mus musculus	in utero embryonic development,inflammatory response,complement activation, alternative pathway,complement activation, classical pathway,positive regulation of vascular endothelial growth factor production,negative regulation of macrophage chemotaxis,negative regulation of endopeptidase activity,cytolysis,positive regulation of angiogenesis,positive regulation of chemokine secretion	endopeptidase inhibitor activity	membrane attack complex,extracellular exosome	sp	1	2	uniprot_mouse_proteome	>sp|P06684|CO5_MOUSE Complement C5 OS=Mus musculus GN=C5 PE=1 SV=2	7	7
TRUE	Old_Native / Young_Native	Old_Native	Young_Native	15	Q9CR86	1.07226e+06	619597	-0.79125	0.79125	-42.2157	0.577843	0	0.000125816	0.000465187	14	0.133296	Q9CR86	CHSP1_MOUSE	Calcium-regulated heat stable protein 1	Carhsp1	Q9CR86	Mus musculus	regulation of transcription, DNA-templated,regulation of mRNA stability	DNA binding,mRNA 3'-UTR binding,protein binding	cytoplasmic mRNA processing body,cytosol,P granule,extracellular exosome,cytoplasmic exosome (RNase complex)	sp	1	1	uniprot_mouse_proteome	>sp|Q9CR86|CHSP1_MOUSE Calcium-regulated heat stable protein 1 OS=Mus musculus GN=Carhsp1 PE=1 SV=1	3	3
TRUE	Old_Native / Young_Native	Old_Native	Young_Native	10	Q9Z0M5	92520.4	212852	1.20201	1.20201	130.06	2.3006	0	0.000139449	0.000508899	9	0.177643	Q9Z0M5	LICH_MOUSE	Lysosomal acid lipase/cholesteryl ester hydrolase	Lipa	Q9Z0M5	Mus musculus	cell morphogenesis,cytokine production,inflammatory response,cell proliferation,lipid catabolic process,lung development,tissue remodeling,homeostasis of number of cells within a tissue	sterol esterase activity,lipase activity	fibrillar center,lysosome,intracellular membrane-bounded organelle,extracellular exosome	sp	1	2	uniprot_mouse_proteome	>sp|Q9Z0M5|LICH_MOUSE Lysosomal acid lipase/cholesteryl ester hydrolase OS=Mus musculus GN=Lipa PE=1 SV=2	2	2
TRUE	Old_Native / Young_Native	Old_Native	Young_Native	15	L7N1W9;Q66X05	160817	39926.9	-2.00998	2.00998	-75.1724	0.248276	0	0.000149029	0.000539479	14	0.444345	L7N1W9;Q66X05	L7N1W9_MOUSE;NAL4F_MOUSE	NACHT, LRR and PYD domains-containing protein 4F;NACHT, LRR and PYD domains-containing protein 4F	Nlrp4f	L7N1W9;Q66X05	Mus musculus	;inflammatory response,biological_process	;molecular_function,ATP binding	;cellular_component	tr;sp	4;2	1	uniprot_mouse_proteome	>tr|L7N1W9|L7N1W9_MOUSE NACHT, LRR and PYD domains-containing protein 4F OS=Mus musculus GN=Nlrp4f PE=4 SV=1;>sp|Q66X05|NAL4F_MOUSE NACHT, LRR and PYD domains-containing protein 4F OS=Mus musculus GN=Nlrp4f PE=2 SV=1	3	3
TRUE	Old_Native / Young_Native	Old_Native	Young_Native	15	F6SX81;Q6IR34;Q6IR34-2;Q6IR34-3;Q6IR34-5	120766	70946.7	-0.767402	0.767402	-41.2525	0.587475	0	0.000149718	0.000541104	14	0.143156	F6SX81;Q6IR34;Q6IR34-2;Q6IR34-3;Q6IR34-5	F6SX81_MOUSE;GPSM1_MOUSE;GPSM1_MOUSE;GPSM1_MOUSE;GPSM1_MOUSE	G-protein-signaling modulator 1 (Fragment);G-protein-signaling modulator 1;Isoform 2 of G-protein-signaling modulator 1;Isoform 3 of G-protein-signaling modulator 1;Isoform 5 of G-protein-signaling modulator 1	Gpsm1	F6SX81;Q6IR34;Q6IR34-2;Q6IR34-3;Q6IR34-5	Mus musculus	;nervous system development,positive regulation of macroautophagy,cell differentiation,negative regulation of GTPase activity,negative regulation of guanyl-nucleotide exchange factor activity;;;	;GDP-dissociation inhibitor activity,protein binding;;;	;nucleoplasm,Golgi apparatus,cytosol,plasma membrane,protein complex,Golgi membrane,endoplasmic reticulum membrane,cell cortex;;;	tr;sp;sp;sp;sp	1;1;;;	1;3;;;	uniprot_mouse_proteome	>tr|F6SX81|F6SX81_MOUSE G-protein-signaling modulator 1 (Fragment) OS=Mus musculus GN=Gpsm1 PE=1 SV=1;>sp|Q6IR34|GPSM1_MOUSE G-protein-signaling modulator 1 OS=Mus musculus GN=Gpsm1 PE=1 SV=3;>sp|Q6IR34-2|GPSM1_MOUSE Isoform 2 of G-protein-signaling modulator 1 OS=Mus musculus GN=Gpsm1;>sp|Q6IR34-3|GPSM1_MOUSE Isoform 3 of G-protein-signaling modulator 1 OS=Mus musculus GN=Gpsm1;>sp|Q6IR34-5|GPSM…	3	3
TRUE	Old_Native / Young_Native	Old_Native	Young_Native	10	P15655;Q925A1;Q925A2	26073.6	44913.4	0.784558	0.784558	72.2565	1.72257	0	0.000171734	0.000609658	9	0.12605	P15655;Q925A1;Q925A2	FGF2_MOUSE;Q925A1_MOUSE;Q925A2_MOUSE	Fibroblast growth factor 2;Fibroblast growth factor;Fibroblast growth factor	Fgf2	P15655;Q925A1;Q925A2	Mus musculus	activation of MAPKK activity,angiogenesis,branching involved in ureteric bud morphogenesis,organ induction,positive regulation of protein phosphorylation,positive regulation of endothelial cell proliferation,cell migration involved in sprouting angiogenesis,phosphatidylinositol biosynthetic process,aging,positive regulation of cell proliferation,negative regulation of cell proliferation,fibroblas…	fibroblast growth factor receptor binding,cytokine activity,protein binding,growth factor activity,heparin binding,ligand-dependent nuclear receptor transcription coactivator activity,chemoattractant activity,Requires Ontology;;	extracellular space,nucleus,cytoplasm;;	sp;tr;tr	1	1	uniprot_mouse_proteome	>sp|P15655|FGF2_MOUSE Fibroblast growth factor 2 OS=Mus musculus GN=Fgf2 PE=1 SV=1;>tr|Q925A1|Q925A1_MOUSE Fibroblast growth factor OS=Mus musculus GN=Fgf2 PE=1 SV=1;>tr|Q925A2|Q925A2_MOUSE Fibroblast growth factor OS=Mus musculus GN=Fgf2 PE=1 SV=1	2	2
TRUE	Old_Native / Young_Native	Old_Native	Young_Native	10	P27106;Q5EC55	29036.2	11060.7	-1.39241	1.39241	-61.9073	0.380927	0	0.000215946	0.000754971	9	0.228949	P27106;Q5EC55	MIS_MOUSE;Q5EC55_MOUSE	Muellerian-inhibiting factor;Anti-Mullerian hormone	Amh	P27106;Q5EC55	Mus musculus	urogenital system development,Mullerian duct regression,cell-cell signaling,gonadal mesoderm development,regulation of receptor activity,positive regulation of gene expression,cell differentiation;	receptor binding,transforming growth factor beta receptor binding,hormone activity,growth factor activity;	extracellular space,cytoplasm;	sp;tr	2	1	uniprot_mouse_proteome	>sp|P27106|MIS_MOUSE Muellerian-inhibiting factor OS=Mus musculus GN=Amh PE=2 SV=1;>tr|Q5EC55|Q5EC55_MOUSE Anti-Mullerian hormone OS=Mus musculus GN=Amh PE=2 SV=1	2	2
TRUE	Old_Native / Young_Native	Old_Native	Young_Native	40	P16460	308046	160298	-0.942393	0.942393	-47.9631	0.520369	0	0.000255334	0.000868368	39	0.350409	P16460	ASSY_MOUSE	Argininosuccinate synthase	Ass1	P16460	Mus musculus	urea cycle,citrulline metabolic process,argininosuccinate metabolic process,arginine biosynthetic process,aspartate metabolic process,positive regulation of nitric oxide biosynthetic process,cellular response to laminar fluid shear stress,negative regulation of leukocyte cell-cell adhesion	RNA binding,argininosuccinate synthase activity,ATP binding,amino acid binding,identical protein binding	mitochondrion,cytosol,myelin sheath,extracellular exosome	sp	1	1	uniprot_mouse_proteome	>sp|P16460|ASSY_MOUSE Argininosuccinate synthase OS=Mus musculus GN=Ass1 PE=1 SV=1	7	8
TRUE	Old_Native / Young_Native	Old_Native	Young_Native	25	O70551	81769.4	53418.5	-0.614223	0.614223	-34.6718	0.653282	0	0.000318962	0.00104829	24	0.154301	O70551	SRPK1_MOUSE	SRSF protein kinase 1	Srpk1	O70551	Mus musculus	spliceosomal complex assembly,protein phosphorylation,chromosome segregation,cell differentiation,intracellular signal transduction,positive regulation of viral genome replication,negative regulation of viral genome replication,regulation of mRNA processing	magnesium ion binding,RNA binding,protein serine/threonine kinase activity,protein binding,ATP binding	nucleus,cytoplasm,endoplasmic reticulum,cytosol,plasma membrane,nuclear matrix	sp	1	2	uniprot_mouse_proteome	>sp|O70551|SRPK1_MOUSE SRSF protein kinase 1 OS=Mus musculus GN=Srpk1 PE=1 SV=2	5	5
TRUE	Old_Native / Young_Native	Old_Native	Young_Native	30	A0A0A6YWH2;Q9EQX4	491569	316958	-0.6331	0.6331	-35.5211	0.644789	0	0.00034959	0.00114061	29	0.222947	A0A0A6YWH2;Q9EQX4	A0A0A6YWH2_MOUSE;AIF1L_MOUSE	Allograft inflammatory factor 1-like	Aif1l	A0A0A6YWH2;Q9EQX4	Mus musculus	;biological_process	;calcium ion binding,actin filament binding	;cytoplasm,focal adhesion,actin cytoskeleton,ruffle membrane,protein complex,extracellular exosome,actin filament	tr;sp	1	1	uniprot_mouse_proteome	>tr|A0A0A6YWH2|A0A0A6YWH2_MOUSE Allograft inflammatory factor 1-like OS=Mus musculus GN=Aif1l PE=1 SV=1;>sp|Q9EQX4|AIF1L_MOUSE Allograft inflammatory factor 1-like OS=Mus musculus GN=Aif1l PE=1 SV=1	6	6
TRUE	Old_Native / Young_Native	Old_Native	Young_Native	20	P06330	138332	539203	1.96269	1.96269	289.788	3.89788	0	0.000350416	0.00114144	19	0.309237	P06330	HVM51_MOUSE	Ig heavy chain V region AC38 205.12	NaN	P06330	Mus musculus		antigen binding		sp	1	1	uniprot_mouse_proteome	>sp|P06330|HVM51_MOUSE Ig heavy chain V region AC38 205.12 OS=Mus musculus PE=1 SV=1	4	4
TRUE	Old_Native / Young_Native	Old_Native	Young_Native	25	Q9WVH9	154394	96326.4	-0.680612	0.680612	-37.6099	0.623901	0	0.000363899	0.00117704	24	0.197131	Q9WVH9	FBLN5_MOUSE	Fibulin-5	Fbln5	Q9WVH9	Mus musculus	regulation of cell growth,cell adhesion,extracellular matrix organization,protein localization to cell surface,secretion,elastic fiber assembly,regulation of removal of superoxide radicals	integrin binding,calcium ion binding,protein C-terminus binding,protein homodimerization activity	extracellular region,proteinaceous extracellular matrix,extracellular space,extracellular matrix,extracellular exosome,elastic fiber	sp	1	1	uniprot_mouse_proteome	>sp|Q9WVH9|FBLN5_MOUSE Fibulin-5 OS=Mus musculus GN=Fbln5 PE=1 SV=1	5	5
TRUE	Old_Native / Young_Native	Old_Native	Young_Native	10	A0A140T8P2	88163	279620	1.66522	1.66522	217.162	3.17162	0	0.00039021	0.00124424	9	0.300311	A0A140T8P2	A0A140T8P2_MOUSE	Protein Igkv6-20 (Fragment)	Igkv6-20	A0A140T8P2	Mus musculus				tr	4	2	uniprot_mouse_proteome	>tr|A0A140T8P2|A0A140T8P2_MOUSE Protein Igkv6-20 (Fragment) OS=Mus musculus GN=Igkv6-20 PE=4 SV=2	2	2
TRUE	Old_Native / Young_Native	Old_Native	Young_Native	25	Q9EQF6	139919	48942.2	-1.51544	1.51544	-65.0211	0.349789	0	0.000447733	0.00140799	24	0.578751	Q9EQF6	DPYL5_MOUSE	Dihydropyrimidinase-related protein 5	Dpysl5	Q9EQF6	Mus musculus	axon guidance	protein binding,microtubule binding,hydrolase activity, acting on carbon-nitrogen (but not peptide) bonds	cytoplasm,dendrite,neuronal cell body	sp	1	1	uniprot_mouse_proteome	>sp|Q9EQF6|DPYL5_MOUSE Dihydropyrimidinase-related protein 5 OS=Mus musculus GN=Dpysl5 PE=1 SV=1	5	5
TRUE	Old_Native / Young_Native	Old_Native	Young_Native	25	Q8R0W0	90427.7	138446	0.614485	0.614485	53.1011	1.53101	0	0.000517942	0.00158197	24	0.222253	Q8R0W0	EPIPL_MOUSE	Epiplakin	Eppk1	Q8R0W0	Mus musculus	cytoskeleton organization,negative regulation of keratinocyte proliferation,negative regulation of cell migration,regulation of epithelial cell differentiation,wound healing,intermediate filament organization,intermediate filament bundle assembly,negative regulation of epithelial cell proliferation,negative regulation of keratinocyte migration,positive regulation of epithelial cell proliferation …	RNA binding,cytoskeletal protein binding,intermediate filament binding,keratin filament binding	cytoplasm,cytoskeleton,cell-cell junction,bicellular tight junction,basolateral plasma membrane,apicolateral plasma membrane,hemidesmosome,cell projection,keratin filament,intermediate filament cytoskeleton,basal part of cell,cell periphery,perinucleolar compartment	sp	1	2	uniprot_mouse_proteome	>sp|Q8R0W0|EPIPL_MOUSE Epiplakin OS=Mus musculus GN=Eppk1 PE=1 SV=2	5	5
TRUE	Old_Native / Young_Native	Old_Native	Young_Native	85	Q505F5	1595650	2.40865e+06	0.594082	0.594082	50.9511	1.50951	0	0.000535253	0.00162382	84	0.0676553	Q505F5	LRC47_MOUSE	Leucine-rich repeat-containing protein 47	Lrrc47	Q505F5	Mus musculus	biological_process,phenylalanyl-tRNA aminoacylation	RNA binding,phenylalanine-tRNA ligase activity	cellular_component,phenylalanine-tRNA ligase complex	sp	1	1	uniprot_mouse_proteome	>sp|Q505F5|LRC47_MOUSE Leucine-rich repeat-containing protein 47 OS=Mus musculus GN=Lrrc47 PE=1 SV=1	16	17
TRUE	Old_Native / Young_Native	Old_Native	Young_Native	10	P22724	11428.2	30774.6	1.42914	1.42914	169.286	2.69286	0	0.000555989	0.00167767	9	0.30944	P22724	WNT4_MOUSE	Protein Wnt-4	Wnt4	P22724	Mus musculus	metanephros development,branching involved in ureteric bud morphogenesis,mesonephros development,epithelial to mesenchymal transition,embryonic epithelial tube formation,liver development,androgen biosynthetic process,signal transduction,cell-cell signaling,gamete generation,sex differentiation,male gonad development,female gonad development,cellular response to starvation,negative regulation of …	transcription corepressor activity,receptor binding,frizzled binding,protein binding	extracellular region,proteinaceous extracellular matrix,extracellular space,cytoplasm,endoplasmic reticulum lumen,cell surface	sp	1	1	uniprot_mouse_proteome	>sp|P22724|WNT4_MOUSE Protein Wnt-4 OS=Mus musculus GN=Wnt4 PE=1 SV=1	2	2
TRUE	Old_Native / Young_Native	Old_Native	Young_Native	15	A0A0A6YXA5	72411.4	264149	1.86706	1.86706	264.789	3.64789	0	0.000699946	0.00203555	14	0.492888	A0A0A6YXA5	A0A0A6YXA5_MOUSE	MCG114298 (Fragment)	Ighv1-15	A0A0A6YXA5	Mus musculus	phagocytosis, recognition,phagocytosis, engulfment,complement activation, classical pathway,defense response to bacterium,innate immune response,B cell receptor signaling pathway,positive regulation of B cell activation	antigen binding,immunoglobulin receptor binding	external side of plasma membrane,immunoglobulin complex, circulating,blood microparticle	tr	4	1	uniprot_mouse_proteome	>tr|A0A0A6YXA5|A0A0A6YXA5_MOUSE MCG114298 (Fragment) OS=Mus musculus GN=Ighv1-15 PE=4 SV=1	3	3
TRUE	Old_Native / Young_Native	Old_Native	Young_Native	10	E9Q2X6;Q8CG47	50370.3	22448.2	-1.16597	1.16597	-55.4337	0.445663	0	0.000864933	0.00245192	9	0.256543	E9Q2X6;Q8CG47	E9Q2X6_MOUSE;SMC4_MOUSE	Structural maintenance of chromosomes protein;Structural maintenance of chromosomes protein 4	Smc4	E9Q2X6;Q8CG47	Mus musculus	;mitotic chromosome condensation,meiotic chromosome condensation,meiotic chromosome segregation,cell division,kinetochore organization	;protein binding,ATP binding,protein heterodimerization activity	;condensin complex,cytosol,nuclear speck	tr;sp	1	1	uniprot_mouse_proteome	>tr|E9Q2X6|E9Q2X6_MOUSE Structural maintenance of chromosomes protein OS=Mus musculus GN=Smc4 PE=1 SV=1;>sp|Q8CG47|SMC4_MOUSE Structural maintenance of chromosomes protein 4 OS=Mus musculus GN=Smc4 PE=1 SV=1	2	2
TRUE	Old_Native / Young_Native	Old_Native	Young_Native	40	Q64437	389655	632950	0.699896	0.699896	62.4388	1.62439	0	0.00087094	0.00246273	39	0.181262	Q64437	ADH7_MOUSE	Alcohol dehydrogenase class 4 mu/sigma chain	Adh7	Q64437	Mus musculus	retinoid metabolic process,ethanol catabolic process,ethanol oxidation,response to bacterium,fatty acid omega-oxidation,retinol metabolic process,retinoic acid metabolic process,response to ethanol,oxidation-reduction process,extracellular negative regulation of signal transduction	alcohol dehydrogenase (NAD) activity,alcohol dehydrogenase activity, zinc-dependent,aldehyde oxidase activity,retinol dehydrogenase activity,zinc ion binding,oxidoreductase activity,retinol binding,ethanol binding,receptor antagonist activity	extracellular region,intracellular,cytosol,plasma membrane	sp	2	2	uniprot_mouse_proteome	>sp|Q64437|ADH7_MOUSE Alcohol dehydrogenase class 4 mu/sigma chain OS=Mus musculus GN=Adh7 PE=2 SV=2	8	8
TRUE	Old_Native / Young_Native	Old_Native	Young_Native	20	E9PVX6	34857.2	16246.3	-1.10134	1.10134	-53.3917	0.466083	0	0.000899135	0.00251713	19	0.385049	E9PVX6	KI67_MOUSE	Proliferation marker protein Ki-67	Mki67	E9PVX6	Mus musculus	DNA metabolic process,regulation of mitotic nuclear division,cell proliferation,response to organic cyclic compound,hyaluronan metabolic process,animal organ regeneration,cellular response to heat,meiotic cell cycle,regulation of chromosome segregation,hepatocyte proliferation,regulation of chromatin organization,cholangiocyte proliferation	DNA binding,RNA binding,ATP binding,protein C-terminus binding	chromosome, centromeric region,condensed chromosome,nucleus,nucleolus,cytoplasm,membrane,nuclear body	sp	1	1	uniprot_mouse_proteome	>sp|E9PVX6|KI67_MOUSE Proliferation marker protein Ki-67 OS=Mus musculus GN=Mki67 PE=1 SV=1	4	4
TRUE	Old_Native / Young_Native	Old_Native	Young_Native	15	D0QMC3	53314.8	82886	0.636593	0.636593	55.4654	1.55465	0	0.000924578	0.00257872	14	0.167665	D0QMC3	MNDAL_MOUSE	Myeloid cell nuclear differentiation antigen-like protein	Mndal	D0QMC3	Mus musculus	negative regulation of transcription from RNA polymerase II promoter,negative regulation of cell growth	RNA polymerase II core promoter proximal region sequence-specific DNA binding,core promoter binding,transcriptional repressor activity, RNA polymerase II core promoter proximal region sequence-specific binding,molecular_function,double-stranded DNA binding,RNA binding,transcription factor binding,identical protein binding	nucleus,nucleolus,cytosol,membrane	sp	1	1	uniprot_mouse_proteome	>sp|D0QMC3|MNDAL_MOUSE Myeloid cell nuclear differentiation antigen-like protein OS=Mus musculus GN=Mndal PE=1 SV=1	3	3
TRUE	Old_Native / Young_Native	Old_Native	Young_Native	25	Q9Z0R9	213859	124387	-0.78182	0.78182	-41.8367	0.581633	0	0.000943151	0.00261838	24	0.184349	Q9Z0R9	FADS2_MOUSE	Fatty acid desaturase 2	Fads2	Q9Z0R9	Mus musculus	unsaturated fatty acid biosynthetic process,oxidation-reduction process	stearoyl-CoA 9-desaturase activity	endoplasmic reticulum membrane,membrane,integral component of membrane	sp	1	1	uniprot_mouse_proteome	>sp|Q9Z0R9|FADS2_MOUSE Fatty acid desaturase 2 OS=Mus musculus GN=Fads2 PE=1 SV=1	5	5
TRUE	Old_Native / Young_Native	Old_Native	Young_Native	35	A0A0A6YY53;F6TQW2	451649	3.56037e+06	2.97875	2.97875	688.304	7.88304	0	0.00107819	0.00293081	34	0.434175	A0A0A6YY53;F6TQW2	A0A0A6YY53_MOUSE;F6TQW2_MOUSE	Protein Ighg2c (Fragment);Protein Ighg2c	Ighg2c	A0A0A6YY53;F6TQW2	Mus musculus	;humoral immune response mediated by circulating immunoglobulin,phagocytosis, recognition,phagocytosis, engulfment,complement activation, classical pathway,immunoglobulin mediated immune response,antibacterial humoral response,defense response to bacterium,innate immune response,B cell receptor signaling pathway,positive regulation of B cell activation	;antigen binding,immunoglobulin receptor binding	;extracellular space,external side of plasma membrane,integral component of membrane,immunoglobulin complex, circulating,blood microparticle	tr	1	1	uniprot_mouse_proteome	>tr|A0A0A6YY53|A0A0A6YY53_MOUSE Protein Ighg2c (Fragment) OS=Mus musculus GN=Ighg2c PE=1 SV=1;>tr|F6TQW2|F6TQW2_MOUSE Protein Ighg2c OS=Mus musculus GN=Ighg2c PE=1 SV=1	5	7
TRUE	Old_Native / Young_Native	Old_Native	Young_Native	20	P12246	128512	193301	0.588938	0.588938	50.414	1.50414	0	0.00109204	0.00296487	19	0.173067	P12246	SAMP_MOUSE	Serum amyloid P-component	Apcs	P12246	Mus musculus	negative regulation by host of viral exo-alpha-sialidase activity,negative regulation by host of viral glycoprotein metabolic process,innate immune response,negative regulation of monocyte differentiation,negative regulation of viral entry into host cell,negative regulation of viral process,negative regulation of exo-alpha-sialidase activity,negative regulation of glycoprotein metabolic process	complement component C1q binding,calcium ion binding,carbohydrate binding,identical protein binding,virion binding	extracellular space,nucleus,extracellular matrix,extracellular exosome,blood microparticle	sp	1	2	uniprot_mouse_proteome	>sp|P12246|SAMP_MOUSE Serum amyloid P-component OS=Mus musculus GN=Apcs PE=1 SV=2	3	4
TRUE	Old_Native / Young_Native	Old_Native	Young_Native	15	P56960;Q8K366	51136.6	34098.2	-0.58466	0.58466	-33.3193	0.666807	0	0.00121788	0.00324382	14	0.179558	P56960;Q8K366	EXOSX_MOUSE;Q8K366_MOUSE	Exosome component 10;Exosc10 protein	Exosc10	P56960;Q8K366	Mus musculus	nuclear-transcribed mRNA catabolic process, nonsense-mediated decay,maturation of 5.8S rRNA,nuclear-transcribed mRNA catabolic process,dosage compensation by inactivation of X chromosome,negative regulation of telomere maintenance via telomerase,nuclear mRNA surveillance,CUT catabolic process,nuclear polyadenylation-dependent rRNA catabolic process,histone mRNA catabolic process,nuclear retention…	nucleotide binding,3'-5'-exoribonuclease activity,RNA binding,exoribonuclease activity;	nuclear exosome (RNase complex),exosome (RNase complex),nucleus,nucleolus,cytoplasm,cytosol,membrane,transcriptionally active chromatin;	sp;tr	1	2;1	uniprot_mouse_proteome	>sp|P56960|EXOSX_MOUSE Exosome component 10 OS=Mus musculus GN=Exosc10 PE=1 SV=2;>tr|Q8K366|Q8K366_MOUSE Exosc10 protein OS=Mus musculus GN=Exosc10 PE=1 SV=1	3	3
TRUE	Old_Native / Young_Native	Old_Native	Young_Native	50	P26350	12774201	8468190	-0.593108	0.593108	-33.7087	0.662913	0	0.00122847	0.00326046	49	0.0890227	P26350	PTMA_MOUSE	Prothymosin alpha	Ptma	P26350	Mus musculus	histone exchange	activating transcription factor binding,histone binding	nucleoplasm,cytosol,extracellular exosome	sp	1	2	uniprot_mouse_proteome	>sp|P26350|PTMA_MOUSE Prothymosin alpha OS=Mus musculus GN=Ptma PE=1 SV=2	6	10
TRUE	Old_Native / Young_Native	Old_Native	Young_Native	15	O08709	219001	64393.8	-1.76594	1.76594	-70.5965	0.294035	0	0.00124484	0.00329224	14	0.553199	O08709	PRDX6_MOUSE	Peroxiredoxin-6	Prdx6	O08709	Mus musculus	response to reactive oxygen species,response to oxidative stress,bleb assembly,cell redox homeostasis,glycerophospholipid catabolic process,positive regulation of mRNA splicing, via spliceosome,oxidation-reduction process,cellular oxidant detoxification	peroxidase activity,glutathione peroxidase activity,protein binding,ubiquitin protein ligase binding,protein homodimerization activity,cadherin binding,calcium-independent phospholipase A2 activity,peroxiredoxin activity,Requires Ontology	extracellular space,nucleus,cytoplasm,mitochondrion,lysosome,cytosol,membrane,perinuclear region of cytoplasm,extracellular exosome	sp	1	3	uniprot_mouse_proteome	>sp|O08709|PRDX6_MOUSE Peroxiredoxin-6 OS=Mus musculus GN=Prdx6 PE=1 SV=3	2	3
TRUE	Old_Native / Young_Native	Old_Native	Young_Native	30	Q99MQ4	381472	590413	0.630149	0.630149	54.7725	1.54773	0	0.00126925	0.003345	29	0.160386	Q99MQ4	ASPN_MOUSE	Asporin	Aspn	Q99MQ4	Mus musculus	negative regulation of protein kinase activity,cytokine-mediated signaling pathway,bone mineralization,negative regulation of transforming growth factor beta receptor signaling pathway,negative regulation of JAK-STAT cascade,negative regulation of tooth mineralization	protein kinase inhibitor activity,calcium ion binding,protein binding,collagen binding	proteinaceous extracellular matrix,cytoplasm,extracellular matrix	sp	1	1	uniprot_mouse_proteome	>sp|Q99MQ4|ASPN_MOUSE Asporin OS=Mus musculus GN=Aspn PE=1 SV=1	6	6
TRUE	Old_Native / Young_Native	Old_Native	Young_Native	15	P37913;Q3U4X8	44662.2	22698	-0.976492	0.976492	-49.1786	0.508214	0	0.00128527	0.0033714	14	0.22136	P37913;Q3U4X8	DNLI1_MOUSE;Q3U4X8_MOUSE	DNA ligase 1;DNA ligase	Lig1	P37913;Q3U4X8	Mus musculus	DNA replication,DNA ligation,DNA repair,base-excision repair,double-strand break repair via nonhomologous end joining,DNA recombination,response to hydrogen peroxide,cell division,DNA biosynthetic process,Okazaki fragment processing involved in mitotic DNA replication;	DNA binding,DNA ligase activity,DNA ligase (ATP) activity,ATP binding,metal ion binding;	nucleus,nucleoplasm,mitochondrion,intracellular membrane-bounded organelle;	sp;tr	1	2;1	uniprot_mouse_proteome	>sp|P37913|DNLI1_MOUSE DNA ligase 1 OS=Mus musculus GN=Lig1 PE=1 SV=2;>tr|Q3U4X8|Q3U4X8_MOUSE DNA ligase OS=Mus musculus GN=Lig1 PE=1 SV=1	3	3
TRUE	Old_Native / Young_Native	Old_Native	Young_Native	20	E9QKE9;H3BK24;P53564-3	38772.5	25242.4	-0.619183	0.619183	-34.896	0.65104	0	0.00137933	0.00358468	19	0.215655	E9QKE9;H3BK24;P53564-3	E9QKE9_MOUSE;H3BK24_MOUSE;CUX1_MOUSE	Homeobox protein cut-like;Homeobox protein cut-like;Isoform 3 of Homeobox protein cut-like 1	Cux1	E9QKE9;H3BK24;P53564-3	Mus musculus	;;	;;	;;	tr;tr;sp	1;1;	1;2;	uniprot_mouse_proteome	>tr|E9QKE9|E9QKE9_MOUSE Homeobox protein cut-like OS=Mus musculus GN=Cux1 PE=1 SV=1;>tr|H3BK24|H3BK24_MOUSE Homeobox protein cut-like OS=Mus musculus GN=Cux1 PE=1 SV=2;>sp|P53564-3|CUX1_MOUSE Isoform 3 of Homeobox protein cut-like 1 OS=Mus musculus GN=Cux1	4	4
TRUE	Old_Native / Young_Native	Old_Native	Young_Native	15	Q07235	78868.9	39372.7	-1.00226	1.00226	-50.0783	0.499217	0	0.00139736	0.00361066	14	0.252304	Q07235	GDN_MOUSE	Glia-derived nexin	Serpine2	Q07235	Mus musculus	blood coagulation,negative regulation of cell proliferation,response to wounding,negative regulation of peptidase activity,negative regulation of platelet activation,negative regulation of plasminogen activation,negative regulation of sodium ion transport,negative regulation of endopeptidase activity,negative regulation of protein processing,negative regulation of phosphatidylinositol 3-kinase si…	serine-type endopeptidase inhibitor activity,receptor binding,glycosaminoglycan binding,heparin binding	extracellular region,extracellular space,cytosol,extracellular matrix,platelet alpha granule,extrinsic component of external side of plasma membrane,neuromuscular junction,extracellular vesicle	sp	1	2	uniprot_mouse_proteome	>sp|Q07235|GDN_MOUSE Glia-derived nexin OS=Mus musculus GN=Serpine2 PE=1 SV=2	3	3
TRUE	Old_Native / Young_Native	Old_Native	Young_Native	10	E9Q642;Q8BN58;Q8BN58-2;Q8BN58-3	26447.3	10688.7	-1.30704	1.30704	-59.5851	0.404149	0	0.00140147	0.00361711	9	0.268485	E9Q642;Q8BN58;Q8BN58-2;Q8BN58-3	E9Q642_MOUSE;RHG28_MOUSE;RHG28_MOUSE;RHG28_MOUSE	Rho GTPase-activating protein 28;Rho GTPase-activating protein 28;Isoform 2 of Rho GTPase-activating protein 28;Isoform 3 of Rho GTPase-activating protein 28	Arhgap28	E9Q642;Q8BN58;Q8BN58-2;Q8BN58-3	Mus musculus	;signal transduction,positive regulation of GTPase activity,negative regulation of stress fiber assembly,negative regulation of GTP binding;;	;GTPase activator activity;;	;;;	tr;sp;sp;sp	1;1;;	1;1;;	uniprot_mouse_proteome	>tr|E9Q642|E9Q642_MOUSE Rho GTPase-activating protein 28 OS=Mus musculus GN=Arhgap28 PE=1 SV=1;>sp|Q8BN58|RHG28_MOUSE Rho GTPase-activating protein 28 OS=Mus musculus GN=Arhgap28 PE=1 SV=1;>sp|Q8BN58-2|RHG28_MOUSE Isoform 2 of Rho GTPase-activating protein 28 OS=Mus musculus GN=Arhgap28;>sp|Q8BN58-3|RHG28_MOUSE Isoform 3 of Rho GTPase-activating protein 28 OS=Mus musculus GN=Arhgap28	2	2
TRUE	Old_Native / Young_Native	Old_Native	Young_Native	40	F8WGE3;Q8K442	97247.6	171267	0.816516	0.816516	76.1147	1.76115	0	0.00147152	0.00376763	39	0.537143	F8WGE3;Q8K442	F8WGE3_MOUSE;ABC8A_MOUSE	ATP-binding cassette sub-family A member 8-A	Abca8a	F8WGE3;Q8K442	Mus musculus	;lipid transport,transmembrane transport	;ATP binding,ATPase activity, coupled to transmembrane movement of substances	;mitochondrial inner membrane,plasma membrane,integral component of membrane	tr;sp	1	1;2	uniprot_mouse_proteome	>tr|F8WGE3|F8WGE3_MOUSE ATP-binding cassette sub-family A member 8-A OS=Mus musculus GN=Abca8a PE=1 SV=1;>sp|Q8K442|ABC8A_MOUSE ATP-binding cassette sub-family A member 8-A OS=Mus musculus GN=Abca8a PE=1 SV=2	8	8
TRUE	Old_Native / Young_Native	Old_Native	Young_Native	10	A0A0B4J1G1;P08101-2	38183.5	75124.6	0.976337	0.976337	96.7464	1.96746	0	0.00148139	0.00378427	9	0.249651	A0A0B4J1G1;P08101-2	A0A0B4J1G1_MOUSE;FCGR2_MOUSE	Low affinity immunoglobulin gamma Fc region receptor II;Isoform IIB2 of Low affinity immunoglobulin gamma Fc region receptor II	Fcgr2b;Fcgr2	A0A0B4J1G1;P08101-2	Mus musculus	;	;	;	tr;sp	1;	1;	uniprot_mouse_proteome	>tr|A0A0B4J1G1|A0A0B4J1G1_MOUSE Low affinity immunoglobulin gamma Fc region receptor II OS=Mus musculus GN=Fcgr2b PE=1 SV=1;>sp|P08101-2|FCGR2_MOUSE Isoform IIB2 of Low affinity immunoglobulin gamma Fc region receptor II OS=Mus musculus GN=Fcgr2	2	2
TRUE	Old_Native / Young_Native	Old_Native	Young_Native	20	Q91V77	123215	211226	0.777607	0.777607	71.4285	1.71428	0	0.00148088	0.00378427	19	0.208995	Q91V77	Q91V77_MOUSE	Protein S100	S100a1	Q91V77	Mus musculus				tr	1	1	uniprot_mouse_proteome	>tr|Q91V77|Q91V77_MOUSE Protein S100 OS=Mus musculus GN=S100a1 PE=1 SV=1	3	4
TRUE	Old_Native / Young_Native	Old_Native	Young_Native	20	D3Z5G7	1.24226e+06	1.89538e+06	0.609512	0.609512	52.5744	1.52574	0	0.00181606	0.00448025	19	0.196098	D3Z5G7	D3Z5G7_MOUSE	Carboxylic ester hydrolase	Ces1b	D3Z5G7	Mus musculus	biological_process	carboxylic ester hydrolase activity		tr	1	1	uniprot_mouse_proteome	>tr|D3Z5G7|D3Z5G7_MOUSE Carboxylic ester hydrolase OS=Mus musculus GN=Ces1b PE=1 SV=1	3	4
TRUE	Old_Native / Young_Native	Old_Native	Young_Native	15	O54825	62009.6	38337.7	-0.69373	0.69373	-38.1747	0.618253	0	0.00195429	0.00470378	14	0.162487	O54825	BYST_MOUSE	Bystin	Bysl	O54825	Mus musculus	maturation of SSU-rRNA from tricistronic rRNA transcript (SSU-rRNA, 5.8S rRNA, LSU-rRNA),in utero embryonic development,blastocyst formation,trophectodermal cell differentiation,cell adhesion,cell proliferation	RNA binding	nucleus,nucleolus,cytoplasm,membrane,intracellular membrane-bounded organelle,apical part of cell	sp	1	3	uniprot_mouse_proteome	>sp|O54825|BYST_MOUSE Bystin OS=Mus musculus GN=Bysl PE=1 SV=3	3	3
TRUE	Old_Native / Young_Native	Old_Native	Young_Native	60	Q9R0Y5;Q9R0Y5-2	1.6899e+06	2.54417e+06	0.590257	0.590257	50.5515	1.50551	0	0.00195222	0.00470378	59	0.175024	Q9R0Y5;Q9R0Y5-2	KAD1_MOUSE	Adenylate kinase isoenzyme 1;Isoform 2 of Adenylate kinase isoenzyme 1	Ak1	Q9R0Y5;Q9R0Y5-2	Mus musculus	nucleoside diphosphate phosphorylation,cell cycle arrest,nucleoside triphosphate biosynthetic process,ATP metabolic process;	adenylate kinase activity,nucleoside diphosphate kinase activity,ATP binding;	outer dense fiber,cytoplasm,cytosol,plasma membrane,sperm flagellum,extracellular exosome;	sp	1;	1;	uniprot_mouse_proteome	>sp|Q9R0Y5|KAD1_MOUSE Adenylate kinase isoenzyme 1 OS=Mus musculus GN=Ak1 PE=1 SV=1;>sp|Q9R0Y5-2|KAD1_MOUSE Isoform 2 of Adenylate kinase isoenzyme 1 OS=Mus musculus GN=Ak1	10	12
TRUE	Old_Native / Young_Native	Old_Native	Young_Native	15	Q8C4U3	53567.2	94428.6	0.817872	0.817872	76.2804	1.7628	0	0.00222208	0.00521968	14	0.252719	Q8C4U3	SFRP1_MOUSE	Secreted frizzled-related protein 1	Sfrp1	Q8C4U3	Mus musculus	osteoblast differentiation,ureteric bud development,somitogenesis,neural tube closure,hematopoietic progenitor cell differentiation,proteolysis,G-protein coupled receptor signaling pathway,positive regulation of cell proliferation,negative regulation of cell proliferation,male gonad development,female gonad development,cellular response to starvation,dorsal/ventral axis specification,anterior/pos…	cysteine-type endopeptidase activity,G-protein coupled receptor activity,frizzled binding,protein binding,drug binding,heparin binding,Wnt-protein binding,identical protein binding,Wnt-activated receptor activity	proteinaceous extracellular matrix,extracellular space,intracellular,cytosol,plasma membrane,cell surface,integral component of membrane,extracellular matrix,extracellular exosome	sp	1	3	uniprot_mouse_proteome	>sp|Q8C4U3|SFRP1_MOUSE Secreted frizzled-related protein 1 OS=Mus musculus GN=Sfrp1 PE=1 SV=3	3	3
TRUE	Old_Native / Young_Native	Old_Native	Young_Native	40	E9Q6A6;Q8C6K9	140871	212472	0.592894	0.592894	50.827	1.50827	0	0.00248374	0.00570905	39	0.172387	E9Q6A6;Q8C6K9	E9Q6A6_MOUSE;CO6A6_MOUSE	Collagen alpha-6(VI) chain	Col6a6	E9Q6A6;Q8C6K9	Mus musculus	;cell adhesion	;molecular_function	;extracellular region,proteinaceous extracellular matrix,collagen trimer,extracellular matrix	tr;sp	1	2	uniprot_mouse_proteome	>tr|E9Q6A6|E9Q6A6_MOUSE Collagen alpha-6(VI) chain OS=Mus musculus GN=Col6a6 PE=1 SV=2;>sp|Q8C6K9|CO6A6_MOUSE Collagen alpha-6(VI) chain OS=Mus musculus GN=Col6a6 PE=1 SV=2	8	8
TRUE	Old_Native / Young_Native	Old_Native	Young_Native	10	A0A140T8P6	38465	118427	1.62238	1.62238	207.883	3.07883	0	0.00259335	0.00592464	9	0.404066	A0A140T8P6	A0A140T8P6_MOUSE	Protein Igkv12-46 (Fragment)	Igkv12-46	A0A140T8P6	Mus musculus				tr	1	2	uniprot_mouse_proteome	>tr|A0A140T8P6|A0A140T8P6_MOUSE Protein Igkv12-46 (Fragment) OS=Mus musculus GN=Igkv12-46 PE=1 SV=2	2	2
TRUE	Old_Native / Young_Native	Old_Native	Young_Native	10	Q8R323	36215.9	23073.1	-0.650415	0.650415	-36.2903	0.637097	0	0.00276746	0.00627143	9	0.142334	Q8R323	RFC3_MOUSE	Replication factor C subunit 3	Rfc3	Q8R323	Mus musculus	DNA replication,DNA-dependent DNA replication,DNA repair,response to organophosphorus,positive regulation of DNA-directed DNA polymerase activity	DNA binding,DNA clamp loader activity,ATPase activity,single-stranded DNA-dependent ATPase activity	nucleus,DNA replication factor C complex,Ctf18 RFC-like complex	sp	1	1	uniprot_mouse_proteome	>sp|Q8R323|RFC3_MOUSE Replication factor C subunit 3 OS=Mus musculus GN=Rfc3 PE=1 SV=1	2	2
TRUE	Old_Native / Young_Native	Old_Native	Young_Native	15	A4QPC5;P21844	11421.4	42006.6	1.87888	1.87888	267.789	3.67789	0	0.00300836	0.00672916	14	0.849907	A4QPC5;P21844	A4QPC5_MOUSE;CMA1_MOUSE	Chymase	Cma1	A4QPC5;P21844	Mus musculus	;proteolysis,interleukin-1 beta biosynthetic process	;endopeptidase activity,serine-type endopeptidase activity,serine-type peptidase activity	;intracellular,secretory granule,extracellular matrix	tr;sp	1	1;2	uniprot_mouse_proteome	>tr|A4QPC5|A4QPC5_MOUSE Chymase OS=Mus musculus GN=Cma1 PE=1 SV=1;>sp|P21844|CMA1_MOUSE Chymase OS=Mus musculus GN=Cma1 PE=1 SV=2	3	3
TRUE	Old_Native / Young_Native	Old_Native	Young_Native	25	Q9D1I2	203012	310204	0.611653	0.611653	52.8009	1.52801	0	0.00322228	0.00715074	24	0.198501	Q9D1I2	CAR19_MOUSE	Caspase recruitment domain-containing protein 19	Card19	Q9D1I2	Mus musculus	biological_process,regulation of apoptotic process	molecular_function	mitochondrion,endoplasmic reticulum membrane,integral component of membrane,mitochondrial membrane	sp	1	1	uniprot_mouse_proteome	>sp|Q9D1I2|CAR19_MOUSE Caspase recruitment domain-containing protein 19 OS=Mus musculus GN=Card19 PE=1 SV=1	5	5
TRUE	Old_Native / Young_Native	Old_Native	Young_Native	15	A2A8R7;B2RX14	60142.3	36556.2	-0.718262	0.718262	-39.2171	0.607829	0	0.00340126	0.00748144	14	0.276234	A2A8R7;B2RX14	A2A8R7_MOUSE;TUT4_MOUSE	Terminal uridylyltransferase 4	Zcchc11	A2A8R7;B2RX14	Mus musculus	;cytokine production,miRNA metabolic process,miRNA catabolic process,stem cell population maintenance,pre-miRNA processing,RNA 3'-end processing,regulation of lipopolysaccharide-mediated signaling pathway,negative regulation of NF-kappaB transcription factor activity,positive regulation of interleukin-6 production,interleukin-6-mediated signaling pathway,histone mRNA catabolic process	;RNA binding,protein binding,zinc ion binding,RNA uridylyltransferase activity	;extracellular space,nucleus,nucleolus,cytoplasm,cytosol,extracellular exosome	tr;sp	1	1;2	uniprot_mouse_proteome	>tr|A2A8R7|A2A8R7_MOUSE Terminal uridylyltransferase 4 OS=Mus musculus GN=Zcchc11 PE=1 SV=1;>sp|B2RX14|TUT4_MOUSE Terminal uridylyltransferase 4 OS=Mus musculus GN=Zcchc11 PE=1 SV=2	3	3
TRUE	Old_Native / Young_Native	Old_Native	Young_Native	40	E9QJW0;Q91VS7	6.43367e+06	10565076	0.71559	0.71559	64.2155	1.64215	0	0.0035571	0.00774841	39	0.529777	E9QJW0;Q91VS7	E9QJW0_MOUSE;MGST1_MOUSE	Microsomal glutathione S-transferase 1	Mgst1	E9QJW0;Q91VS7	Mus musculus	;glutathione metabolic process,oxidation-reduction process,protein homotrimerization,cellular response to lipid hydroperoxide,cellular oxidant detoxification	;glutathione transferase activity,glutathione peroxidase activity	;mitochondrion,mitochondrial outer membrane,mitochondrial inner membrane,endoplasmic reticulum,endoplasmic reticulum membrane,integral component of membrane	tr;sp	1	1;3	uniprot_mouse_proteome	>tr|E9QJW0|E9QJW0_MOUSE Microsomal glutathione S-transferase 1 OS=Mus musculus GN=Mgst1 PE=1 SV=1;>sp|Q91VS7|MGST1_MOUSE Microsomal glutathione S-transferase 1 OS=Mus musculus GN=Mgst1 PE=1 SV=3	4	8
TRUE	Old_Native / Young_Native	Old_Native	Young_Native	10	P08905	73571.6	146447	0.993154	0.993154	99.0532	1.99053	0	0.00375002	0.00809802	9	0.253742	P08905	LYZ2_MOUSE	Lysozyme C-2	Lyz2	P08905	Mus musculus	cell wall macromolecule catabolic process,cytolysis,defense response to bacterium,defense response to Gram-negative bacterium,defense response to Gram-positive bacterium	lysozyme activity,identical protein binding	extracellular space,extracellular exosome	sp	1	2	uniprot_mouse_proteome	>sp|P08905|LYZ2_MOUSE Lysozyme C-2 OS=Mus musculus GN=Lyz2 PE=1 SV=2	2	2
TRUE	Old_Native / Young_Native	Old_Native	Young_Native	15	Q8R3I2;Q8R3I2-2;Q8R3I2-3	81618.8	41960.7	-0.959861	0.959861	-48.5893	0.514107	0	0.00429309	0.00900268	14	0.669448	Q8R3I2;Q8R3I2-2;Q8R3I2-3	MBOA2_MOUSE	Lysophospholipid acyltransferase 2;Isoform 2 of Lysophospholipid acyltransferase 2;Isoform 3 of Lysophospholipid acyltransferase 2	Mboat2	Q8R3I2;Q8R3I2-2;Q8R3I2-3	Mus musculus	biological_process,phospholipid biosynthetic process;;	molecular_function,1-acylglycerophosphocholine O-acyltransferase activity;;	cellular_component,endoplasmic reticulum,integral component of membrane;;	sp	1;;	1;;	uniprot_mouse_proteome	>sp|Q8R3I2|MBOA2_MOUSE Lysophospholipid acyltransferase 2 OS=Mus musculus GN=Mboat2 PE=1 SV=1;>sp|Q8R3I2-2|MBOA2_MOUSE Isoform 2 of Lysophospholipid acyltransferase 2 OS=Mus musculus GN=Mboat2;>sp|Q8R3I2-3|MBOA2_MOUSE Isoform 3 of Lysophospholipid acyltransferase 2 OS=Mus musculus GN=Mboat2	3	3
TRUE	Old_Native / Young_Native	Old_Native	Young_Native	85	Q3UHK6;Q3UHK6-2;Q3UHK6-3;Q3UHK6-4	263541	165174	-0.674046	0.674046	-37.3253	0.626747	0	0.00432921	0.00905307	84	0.192864	Q3UHK6;Q3UHK6-2;Q3UHK6-3;Q3UHK6-4	TEN4_MOUSE	Teneurin-4;Isoform 2 of Teneurin-4;Isoform 3 of Teneurin-4;Isoform 4 of Teneurin-4	Tenm4	Q3UHK6;Q3UHK6-2;Q3UHK6-3;Q3UHK6-4	Mus musculus	cell morphogenesis,gastrulation with mouth forming second,heterophilic cell-cell adhesion via plasma membrane cell adhesion molecules,signal transduction,regulation of myelination,positive regulation of myelination,central nervous system myelin formation,neuron development,positive regulation of oligodendrocyte differentiation,cardiac muscle cell proliferation,cardiac cell fate specification,self…	protein homodimerization activity,protein heterodimerization activity,cell adhesion molecule binding;;;	nucleus,cytoplasm,plasma membrane,integral component of plasma membrane,neuron projection;;;	sp	1;;;	2;;;	uniprot_mouse_proteome	>sp|Q3UHK6|TEN4_MOUSE Teneurin-4 OS=Mus musculus GN=Tenm4 PE=1 SV=2;>sp|Q3UHK6-2|TEN4_MOUSE Isoform 2 of Teneurin-4 OS=Mus musculus GN=Tenm4;>sp|Q3UHK6-3|TEN4_MOUSE Isoform 3 of Teneurin-4 OS=Mus musculus GN=Tenm4;>sp|Q3UHK6-4|TEN4_MOUSE Isoform 4 of Teneurin-4 OS=Mus musculus GN=Tenm4	17	17
TRUE	Old_Native / Young_Native	Old_Native	Young_Native	10	P54320	46577.4	22803.8	-1.03036	1.03036	-51.041	0.48959	0	0.00448695	0.00930504	9	0.624606	P54320	ELN_MOUSE	Elastin	Eln	P54320	Mus musculus	skeletal muscle tissue development,extracellular matrix organization,regulation of actin filament polymerization,stress fiber assembly	extracellular matrix structural constituent,protein binding,extracellular matrix binding	proteinaceous extracellular matrix,mitochondrion,elastic fiber	sp	1	2	uniprot_mouse_proteome	>sp|P54320|ELN_MOUSE Elastin OS=Mus musculus GN=Eln PE=1 SV=2	2	2
