# Supplementary material for: Proteomic quantification of native and ECM-enriched mouse ovaries reveals an age-dependent fibro-inflammatory signature
Source: Aging (Albany NY). 2023 Oct 27;15(20):10821–55. doi: 10.18632/aging.205190 (PMC10637783; doi:10.18632/aging.205190)
Supplement: Supplementary Table 4 [file aging-15-205190-s005.xlsx]

## Sheet: ECM-Enr Sig Altered Proteins
Supplementary Table 4. Proteins significantly altered with advanced age in ECM-enriched ovaries.
Young and Old ECM-Enriched Mouse Ovaries			279 total proteins significantly altered
	Old_ECM-Enriched / Young_ECM-Enriched		Q < 0.01 and absolute AVG log2 ratio > 0.58
									log2>0.58					Q<0.01
Valid	Comparison (group1/group2)	Condition Numerator	Condition Denominator	# of Ratios	Group	AVG Group Quantity Denominator	AVG Group Quantity Numerator	AVG Log2 Ratio	Absolute AVG Log2 Ratio	% Change	Ratio	Standard Deviation	Pvalue	Qvalue	Degrees Of Freedom	Standard Error	ProteinGroups	ProteinNames	ProteinDescriptions	Genes	UniProtIds	Organisms	GO Biological Process	GO Molecular Function	GO Cellular Component	Database	Protein Existence	Sequence Version	FASTAName	FASTAHeader	# Unique Total Peptides	# Unique Total EG.Id
TRUE	Old_Decellularized / Young_Decellularized	Old_Decellularized	Young_Decellularized	805	Q80YX1	14622860	27916240	0.932879	0.932879	90.9082	1.90908	0	5.04428e-102	7.19315e-99	804	0.0522149	Q80YX1	TENA_MOUSE	Tenascin	Tnc	Q80YX1	Mus musculus	osteoblast differentiation,cell adhesion,negative regulation of cell adhesion,neuromuscular junction development,positive regulation of cell proliferation,response to mechanical stimulus,positive regulation of gene expression,peripheral nervous system axon regeneration,wound healing,odontogenesis of dentin-containing tooth,response to ethanol,bud outgrowth involved in lung branching,mesenchymal-e…	fibronectin binding,syndecan binding	extracellular region,basement membrane,interstitial matrix,extracellular space,focal adhesion,membrane,extracellular matrix	sp	1	1	uniprot_mouse_proteome	>sp|Q80YX1|TENA_MOUSE Tenascin OS=Mus musculus GN=Tnc PE=1 SV=1	89	161
TRUE	Old_Decellularized / Young_Decellularized	Old_Decellularized	Young_Decellularized	505	P06795	14772404	31762938	1.10444	1.10444	115.015	2.15015	0	3.26505e-53	1.55199e-50	504	0.0840584	P06795	MDR1B_MOUSE	Multidrug resistance protein 1B	Abcb1b	P06795	Mus musculus	drug transmembrane transport,xenobiotic transport	ATP binding,xenobiotic-transporting ATPase activity	mitochondrion,plasma membrane,integral component of membrane,intercellular canaliculus	sp	1	1	uniprot_mouse_proteome	>sp|P06795|MDR1B_MOUSE Multidrug resistance protein 1B OS=Mus musculus GN=Abcb1b PE=1 SV=1	52	101
TRUE	Old_Decellularized / Young_Decellularized	Old_Decellularized	Young_Decellularized	430	O35452	1394287	2565763	0.87986	0.87986	84.0197	1.8402	0	4.8404e-49	1.7256e-46	429	0.0665361	O35452	O35452_MOUSE	Protein Tnxb	Tnxb	O35452	Mus musculus	lipid metabolic process,fatty acid metabolic process,triglyceride metabolic process,cell-matrix adhesion,extracellular matrix organization,collagen fibril organization,collagen metabolic process,regulation of JUN kinase activity,elastic fiber assembly,cell-cell adhesion,phospholipid metabolic process,positive regulation of cell adhesion	collagen binding,heparin binding	extracellular region,proteinaceous extracellular matrix,extracellular space,intracellular,extracellular matrix,extracellular exosome,fibrillar collagen trimer	tr	1	1	uniprot_mouse_proteome	>tr|O35452|O35452_MOUSE Protein Tnxb OS=Mus musculus GN=Tnxb PE=1 SV=1	78	86
TRUE	Old_Decellularized / Young_Decellularized	Old_Decellularized	Young_Decellularized	195	P16406	2330527	1.37541e+06	-0.760799	0.760799	-40.983	0.59017	0	2.22248e-44	6.33852e-42	194	0.0538563	P16406	AMPE_MOUSE	Glutamyl aminopeptidase	Enpep	P16406	Mus musculus	angiogenesis,angiotensin maturation,regulation of systemic arterial blood pressure by renin-angiotensin,regulation of blood pressure,cell proliferation,cell migration,glomerulus development,peptide catabolic process	aminopeptidase activity,peptidase activity,metallopeptidase activity,zinc ion binding,peptide binding,metalloaminopeptidase activity	lysosomal membrane,plasma membrane,brush border,external side of plasma membrane,integral component of membrane,apical plasma membrane,cytoplasmic vesicle,apical part of cell,extracellular exosome	sp	1	1	uniprot_mouse_proteome	>sp|P16406|AMPE_MOUSE Glutamyl aminopeptidase OS=Mus musculus GN=Enpep PE=1 SV=1	29	39
TRUE	Old_Decellularized / Young_Decellularized	Old_Decellularized	Young_Decellularized	165	Q6B966	1.14361e+06	219723	-2.37984	2.37984	-80.7869	0.192131	0	1.43881e-37	2.27972e-35	164	0.157984	Q6B966	NAL14_MOUSE	NACHT, LRR and PYD domains-containing protein 14	Nlrp14	Q6B966	Mus musculus	multicellular organism development,spermatogenesis,cell differentiation	molecular_function,ATP binding	cellular_component	sp	2	2	uniprot_mouse_proteome	>sp|Q6B966|NAL14_MOUSE NACHT, LRR and PYD domains-containing protein 14 OS=Mus musculus GN=Nlrp14 PE=2 SV=2	27	33
TRUE	Old_Decellularized / Young_Decellularized	Old_Decellularized	Young_Decellularized	235	Q70IV5	1.17011e+06	2.30681e+06	0.979259	0.979259	97.1452	1.97145	0	1.92143e-36	2.73996e-34	234	0.111636	Q70IV5	SYNEM_MOUSE	Synemin	Synm	Q70IV5	Mus musculus	fast-twitch skeletal muscle fiber contraction,intermediate filament cytoskeleton organization	structural constituent of cytoskeleton,protein binding,structural constituent of muscle,vinculin binding,intermediate filament binding,protein binding, bridging	intermediate filament,adherens junction,membrane,Z disc,sarcolemma,costamere,intermediate filament cytoskeleton,neurofilament cytoskeleton	sp	1	2	uniprot_mouse_proteome	>sp|Q70IV5|SYNEM_MOUSE Synemin OS=Mus musculus GN=Synm PE=1 SV=2	44	47
TRUE	Old_Decellularized / Young_Decellularized	Old_Decellularized	Young_Decellularized	245	Q8K2B3	8969576	14334259	0.676356	0.676356	59.8098	1.5981	0	1.59782e-34	1.89874e-32	244	0.0616055	Q8K2B3	SDHA_MOUSE	Succinate dehydrogenase [ubiquinone] flavoprotein subunit, mitochondrial	Sdha	Q8K2B3	Mus musculus	tricarboxylic acid cycle,succinate metabolic process,mitochondrial electron transport, succinate to ubiquinone,nervous system development,anaerobic respiration,respiratory electron transport chain,oxidation-reduction process	succinate dehydrogenase (ubiquinone) activity,electron carrier activity,flavin adenine dinucleotide binding,succinate dehydrogenase activity	nucleolus,mitochondrion,mitochondrial inner membrane,mitochondrial respiratory chain complex II, succinate dehydrogenase complex (ubiquinone),myelin sheath,plasma membrane succinate dehydrogenase complex	sp	1	1	uniprot_mouse_proteome	>sp|Q8K2B3|SDHA_MOUSE Succinate dehydrogenase [ubiquinone] flavoprotein subunit, mitochondrial OS=Mus musculus GN=Sdha PE=1 SV=1	28	49
TRUE	Old_Decellularized / Young_Decellularized	Old_Decellularized	Young_Decellularized	115	J3QNW0;P13864;P13864-2	1.14821e+06	433986	-1.40367	1.40367	-62.2033	0.377967	0	8.06338e-33	8.84491e-31	114	0.0737408	J3QNW0;P13864;P13864-2	J3QNW0_MOUSE;DNMT1_MOUSE;DNMT1_MOUSE	DNA (cytosine-5)-methyltransferase;DNA (cytosine-5)-methyltransferase 1;Isoform 2 of DNA (cytosine-5)-methyltransferase 1	Dnmt1	J3QNW0;P13864;P13864-2	Mus musculus	;negative regulation of transcription from RNA polymerase II promoter,chromatin silencing at rDNA,DNA methylation,transcription, DNA-templated,Ras protein signal transduction,maintenance of DNA methylation,regulation of gene expression,positive regulation of gene expression,gene silencing,chromatin modification,DNA methylation on cytosine,regulation of cell proliferation,DNA methylation involved …	;DNA binding,chromatin binding,RNA binding,DNA (cytosine-5-)-methyltransferase activity,protein binding,methyltransferase activity,zinc ion binding,methyl-CpG binding,DNA-methyltransferase activity,DNA (cytosine-5-)-methyltransferase activity, acting on CpG substrates,promoter-specific chromatin binding;	;heterochromatin,nucleus,nucleoplasm,replication fork,pericentric heterochromatin,cytoplasm;	tr;sp;sp	1;1;	1;5;	uniprot_mouse_proteome	>tr|J3QNW0|J3QNW0_MOUSE DNA (cytosine-5)-methyltransferase OS=Mus musculus GN=Dnmt1 PE=1 SV=1;>sp|P13864|DNMT1_MOUSE DNA (cytosine-5)-methyltransferase 1 OS=Mus musculus GN=Dnmt1 PE=1 SV=5;>sp|P13864-2|DNMT1_MOUSE Isoform 2 of DNA (cytosine-5)-methyltransferase 1 OS=Mus musculus GN=Dnmt1	23	23
TRUE	Old_Decellularized / Young_Decellularized	Old_Decellularized	Young_Decellularized	140	Q9R1M5;Q9R1M5-2;Q9R1M5-3;Q9R1M5-6	1.45299e+06	335514	-2.11458	2.11458	-76.9088	0.230912	0	1.16306e-32	1.18466e-30	139	0.203073	Q9R1M5;Q9R1M5-2;Q9R1M5-3;Q9R1M5-6	NALP5_MOUSE	NACHT, LRR and PYD domains-containing protein 5;Isoform 2 of NACHT, LRR and PYD domains-containing protein 5;Isoform 3 of NACHT, LRR and PYD domains-containing protein 5;Isoform 6 of NACHT, LRR and PYD domains-containing protein 5	Nlrp5	Q9R1M5;Q9R1M5-2;Q9R1M5-3;Q9R1M5-6	Mus musculus	in utero embryonic development,embryo implantation,fertilization,animal organ morphogenesis,regulation of protein stability,cellular protein localization,regulation of RNA stability,cellular protein complex assembly,neuron death;;;	protein binding,ATP binding;;;	nucleolus,cytoplasm,mitochondrion,cytosol,cell cortex,protein complex,apical cortex;;;	sp	1;;;	2;;;	uniprot_mouse_proteome	>sp|Q9R1M5|NALP5_MOUSE NACHT, LRR and PYD domains-containing protein 5 OS=Mus musculus GN=Nlrp5 PE=1 SV=2;>sp|Q9R1M5-2|NALP5_MOUSE Isoform 2 of NACHT, LRR and PYD domains-containing protein 5 OS=Mus musculus GN=Nlrp5;>sp|Q9R1M5-3|NALP5_MOUSE Isoform 3 of NACHT, LRR and PYD domains-containing protein 5 OS=Mus musculus GN=Nlrp5;>sp|Q9R1M5-6|NALP5_MOUSE Isoform 6 of NACHT, LRR and PYD domains-contai…	24	28
TRUE	Old_Decellularized / Young_Decellularized	Old_Decellularized	Young_Decellularized	215	Q8BW75	4.03907e+06	14914261	1.8846	1.8846	269.25	3.6925	0	1.93313e-31	1.83776e-29	214	0.16355	Q8BW75	AOFB_MOUSE	Amine oxidase [flavin-containing] B	Maob	Q8BW75	Mus musculus	response to toxic substance,response to aluminum ion,response to selenium ion,negative regulation of serotonin secretion,substantia nigra development,response to lipopolysaccharide,neurotransmitter catabolic process,response to drug,response to ethanol,positive regulation of dopamine metabolic process,response to corticosterone,oxidation-reduction process	primary amine oxidase activity,protein homodimerization activity,flavin adenine dinucleotide binding	mitochondrion,mitochondrial outer membrane,mitochondrial inner membrane,integral component of membrane,extracellular exosome	sp	1	4	uniprot_mouse_proteome	>sp|Q8BW75|AOFB_MOUSE Amine oxidase [flavin-containing] B OS=Mus musculus GN=Maob PE=1 SV=4	22	43
TRUE	Old_Decellularized / Young_Decellularized	Old_Decellularized	Young_Decellularized	150	P19324	12227677	7316062	-0.741011	0.741011	-40.168	0.59832	0	9.6309e-30	8.58354e-28	149	0.0471488	P19324	SERPH_MOUSE	Serpin H1	Serpinh1	P19324	Mus musculus	chondrocyte development involved in endochondral bone morphogenesis,negative regulation of endopeptidase activity,collagen fibril organization,collagen biosynthetic process,protein maturation	RNA binding,serine-type endopeptidase inhibitor activity,protein binding,collagen binding,unfolded protein binding	cytoplasm,endoplasmic reticulum,endoplasmic reticulum lumen,endoplasmic reticulum-Golgi intermediate compartment,membrane raft,extracellular exosome,extracellular space	sp	1	3	uniprot_mouse_proteome	>sp|P19324|SERPH_MOUSE Serpin H1 OS=Mus musculus GN=Serpinh1 PE=1 SV=3	18	30
TRUE	Old_Decellularized / Young_Decellularized	Old_Decellularized	Young_Decellularized	185	P35441	2.8963e+06	999157	-1.53543	1.53543	-65.5023	0.344977	0	7.94274e-29	6.29242e-27	184	0.104015	P35441	TSP1_MOUSE	Thrombospondin-1	Thbs1	P35441	Mus musculus	activation of MAPK activity,negative regulation of endothelial cell proliferation,negative regulation of cell-matrix adhesion,sprouting angiogenesis,negative regulation of antigen processing and presentation of peptide or polysaccharide antigen via MHC class II,negative regulation of dendritic cell antigen processing and presentation,outflow tract morphogenesis,endocardial cushion development,gro…	phosphatidylserine binding,fibronectin binding,integrin binding,calcium ion binding,protein binding,heparin binding,fibroblast growth factor binding,low-density lipoprotein particle binding,laminin binding,extracellular matrix binding,fibrinogen binding,collagen V binding	fibrinogen complex,extracellular space,endoplasmic reticulum,external side of plasma membrane,cell surface,sarcoplasmic reticulum,secretory granule,extracellular matrix,platelet alpha granule,extracellular exosome	sp	1	1	uniprot_mouse_proteome	>sp|P35441|TSP1_MOUSE Thrombospondin-1 OS=Mus musculus GN=Thbs1 PE=1 SV=1	32	37
TRUE	Old_Decellularized / Young_Decellularized	Old_Decellularized	Young_Decellularized	120	Q8BPB5	1.75059e+06	4392582	1.32723	1.32723	150.92	2.5092	0	1.17179e-26	8.35488e-25	119	0.119386	Q8BPB5	FBLN3_MOUSE	EGF-containing fibulin-like extracellular matrix protein 1	Efemp1	Q8BPB5	Mus musculus	regulation of transcription, DNA-templated,epidermal growth factor receptor signaling pathway,regulation of receptor activity,peptidyl-tyrosine phosphorylation,negative regulation of chondrocyte differentiation,camera-type eye development,embryonic eye morphogenesis,post-embryonic eye morphogenesis	epidermal growth factor-activated receptor activity,epidermal growth factor receptor binding,calcium ion binding,growth factor activity	proteinaceous extracellular matrix,extracellular space,extracellular exosome,extracellular matrix	sp	1	1	uniprot_mouse_proteome	>sp|Q8BPB5|FBLN3_MOUSE EGF-containing fibulin-like extracellular matrix protein 1 OS=Mus musculus GN=Efemp1 PE=1 SV=1	17	24
TRUE	Old_Decellularized / Young_Decellularized	Old_Decellularized	Young_Decellularized	80	Q9WVB3	2.08631e+06	402808	-2.37279	2.37279	-80.6928	0.193072	0	5.93797e-24	3.52814e-22	79	0.14973	Q9WVB3	TLE6_MOUSE	Transducin-like enhancer protein 6	Tle6	Q9WVB3	Mus musculus	positive regulation of neuron differentiation,positive regulation of neurogenesis,embryonic process involved in female pregnancy	protein binding	nucleus,cytosol,cell cortex,protein complex	sp	1	1	uniprot_mouse_proteome	>sp|Q9WVB3|TLE6_MOUSE Transducin-like enhancer protein 6 OS=Mus musculus GN=Tle6 PE=1 SV=1	13	16
TRUE	Old_Decellularized / Young_Decellularized	Old_Decellularized	Young_Decellularized	115	Q9CQA3	6.41993e+06	10305121	0.682731	0.682731	60.5176	1.60518	0	7.50127e-23	4.11416e-21	114	0.0706253	Q9CQA3	SDHB_MOUSE	Succinate dehydrogenase [ubiquinone] iron-sulfur subunit, mitochondrial	Sdhb	Q9CQA3	Mus musculus	tricarboxylic acid cycle,succinate metabolic process,aerobic respiration,respiratory electron transport chain	succinate dehydrogenase (ubiquinone) activity,electron carrier activity,metal ion binding,ubiquinone binding,2 iron, 2 sulfur cluster binding,3 iron, 4 sulfur cluster binding,4 iron, 4 sulfur cluster binding	nucleoplasm,mitochondrion,mitochondrial inner membrane,mitochondrial respiratory chain complex II, succinate dehydrogenase complex (ubiquinone),plasma membrane,respiratory chain complex II,extracellular exosome	sp	1	1	uniprot_mouse_proteome	>sp|Q9CQA3|SDHB_MOUSE Succinate dehydrogenase [ubiquinone] iron-sulfur subunit, mitochondrial OS=Mus musculus GN=Sdhb PE=1 SV=1	15	23
TRUE	Old_Decellularized / Young_Decellularized	Old_Decellularized	Young_Decellularized	110	P47911	26019784	15898391	-0.710728	0.710728	-38.8988	0.611012	0	8.73738e-23	4.61463e-21	109	0.0497422	P47911	RL6_MOUSE	60S ribosomal protein L6	Rpl6	P47911	Mus musculus	ribosomal large subunit assembly,cytoplasmic translation	RNA binding,structural constituent of ribosome,cadherin binding	nucleus,nucleolus,cytoplasm,focal adhesion,membrane,cytosolic large ribosomal subunit,cytoplasmic ribonucleoprotein granule	sp	1	3	uniprot_mouse_proteome	>sp|P47911|RL6_MOUSE 60S ribosomal protein L6 OS=Mus musculus GN=Rpl6 PE=1 SV=3	13	22
TRUE	Old_Decellularized / Young_Decellularized	Old_Decellularized	Young_Decellularized	150	Q99NB1	1.75172e+06	3025663	0.788482	0.788482	72.7256	1.72726	0	1.30961e-22	6.66968e-21	149	0.102663	Q99NB1	ACS2L_MOUSE	Acetyl-coenzyme A synthetase 2-like, mitochondrial	Acss1	Q99NB1	Mus musculus	acetyl-CoA biosynthetic process,acetate biosynthetic process,acetyl-CoA biosynthetic process from acetate,propionate biosynthetic process	acetate-CoA ligase activity,ATP binding,AMP binding	mitochondrion,mitochondrial matrix	sp	1	1	uniprot_mouse_proteome	>sp|Q99NB1|ACS2L_MOUSE Acetyl-coenzyme A synthetase 2-like, mitochondrial OS=Mus musculus GN=Acss1 PE=1 SV=1	25	30
TRUE	Old_Decellularized / Young_Decellularized	Old_Decellularized	Young_Decellularized	90	P29391;Q9CPX4	2317582	4.03332e+06	0.799347	0.799347	74.0314	1.74031	0	3.44494e-20	1.53515e-18	89	0.0835811	P29391;Q9CPX4	FRIL1_MOUSE;Q9CPX4_MOUSE	Ferritin light chain 1;Ferritin	Ftl1;Ftl1-ps1	P29391;Q9CPX4	Mus musculus	iron ion transport,intracellular sequestering of iron ion,receptor-mediated endocytosis;	iron ion binding,protein binding,ferric iron binding,identical protein binding;	extracellular region,cytoplasm,intracellular ferritin complex,membrane,autolysosome,extracellular exosome,endocytic vesicle lumen;	sp;tr	1	2;1	uniprot_mouse_proteome	>sp|P29391|FRIL1_MOUSE Ferritin light chain 1 OS=Mus musculus GN=Ftl1 PE=1 SV=2;>tr|Q9CPX4|Q9CPX4_MOUSE Ferritin OS=Mus musculus GN=Ftl1-ps1 PE=1 SV=1	9	18
TRUE	Old_Decellularized / Young_Decellularized	Old_Decellularized	Young_Decellularized	70	O08807	5324103	2.6002e+06	-1.03391	1.03391	-51.1616	0.488384	0	2.37777e-19	9.97264e-18	69	0.0714934	O08807	PRDX4_MOUSE	Peroxiredoxin-4	Prdx4	O08807	Mus musculus	spermatogenesis,male gonad development,4-hydroxyproline metabolic process,protein maturation by protein folding,extracellular matrix organization,cell redox homeostasis,oxidation-reduction process,reactive oxygen species metabolic process,cellular oxidant detoxification,negative regulation of male germ cell proliferation	peroxidase activity,protein binding,protein homodimerization activity,peroxiredoxin activity	nucleus,cytoplasm,mitochondrion,endoplasmic reticulum,smooth endoplasmic reticulum,cytosol,extracellular exosome	sp	1	1	uniprot_mouse_proteome	>sp|O08807|PRDX4_MOUSE Peroxiredoxin-4 OS=Mus musculus GN=Prdx4 PE=1 SV=1	10	14
TRUE	Old_Decellularized / Young_Decellularized	Old_Decellularized	Young_Decellularized	75	Q9Z110;Q9Z110-2	1.35169e+06	777668	-0.797542	0.797542	-42.4672	0.575328	0	3.21271e-19	1.30895e-17	74	0.073658	Q9Z110;Q9Z110-2	P5CS_MOUSE	Delta-1-pyrroline-5-carboxylate synthase;Isoform Short of Delta-1-pyrroline-5-carboxylate synthase	Aldh18a1	Q9Z110;Q9Z110-2	Mus musculus	glutamate metabolic process,proline biosynthetic process,ornithine biosynthetic process,cellular amino acid biosynthetic process,phosphorylation,citrulline biosynthetic process,oxidation-reduction process,L-proline biosynthetic process;	RNA binding,glutamate 5-kinase activity,glutamate-5-semialdehyde dehydrogenase activity,ATP binding,delta1-pyrroline-5-carboxylate synthetase activity,identical protein binding;	mitochondrion,mitochondrial inner membrane,cytosol;	sp	1;	2;	uniprot_mouse_proteome	>sp|Q9Z110|P5CS_MOUSE Delta-1-pyrroline-5-carboxylate synthase OS=Mus musculus GN=Aldh18a1 PE=1 SV=2;>sp|Q9Z110-2|P5CS_MOUSE Isoform Short of Delta-1-pyrroline-5-carboxylate synthase OS=Mus musculus GN=Aldh18a1	14	15
TRUE	Old_Decellularized / Young_Decellularized	Old_Decellularized	Young_Decellularized	260	P48036	201533104	118818408	-0.762258	0.762258	-41.0427	0.589573	0	4.34041e-19	1.71929e-17	259	0.0598712	P48036	ANXA5_MOUSE	Annexin A5	Anxa5	P48036	Mus musculus	blood coagulation,response to organic substance,negative regulation of coagulation	calcium ion binding,protein binding,calcium-dependent phospholipid binding	intracellular,focal adhesion,external side of plasma membrane,membrane,extracellular exosome,endothelial microparticle	sp	1	1	uniprot_mouse_proteome	>sp|P48036|ANXA5_MOUSE Annexin A5 OS=Mus musculus GN=Anxa5 PE=1 SV=1	25	52
TRUE	Old_Decellularized / Young_Decellularized	Old_Decellularized	Young_Decellularized	125	Q61503	1.01067e+06	2.8564e+06	1.49888	1.49888	182.624	2.82624	0	1.4403e-18	5.32934e-17	124	0.208478	Q61503	5NTD_MOUSE	5'-nucleotidase	Nt5e	Q61503	Mus musculus	AMP catabolic process,leukocyte cell-cell adhesion,dephosphorylation,adenosine biosynthetic process,negative regulation of inflammatory response	nucleotide binding,5'-nucleotidase activity,metal ion binding	cytosol,plasma membrane,cell surface,membrane,anchored component of membrane,extracellular exosome	sp	1	2	uniprot_mouse_proteome	>sp|Q61503|5NTD_MOUSE 5'-nucleotidase OS=Mus musculus GN=Nt5e PE=1 SV=2	18	25
TRUE	Old_Decellularized / Young_Decellularized	Old_Decellularized	Young_Decellularized	125	Q61555	661040	372668	-0.826847	0.826847	-43.624	0.56376	0	1.45753e-18	5.32934e-17	124	0.0759573	Q61555	FBN2_MOUSE	Fibrillin-2	Fbn2	Q61555	Mus musculus	embryonic limb morphogenesis,positive regulation of bone mineralization,limb morphogenesis,sequestering of TGFbeta in extracellular matrix,camera-type eye development,positive regulation of osteoblast differentiation,embryonic eye morphogenesis,bone trabecula formation	extracellular matrix structural constituent,calcium ion binding,protein binding	microfibril,extracellular region,proteinaceous extracellular matrix,extracellular matrix	sp	1	2	uniprot_mouse_proteome	>sp|Q61555|FBN2_MOUSE Fibrillin-2 OS=Mus musculus GN=Fbn2 PE=1 SV=2	23	25
TRUE	Old_Decellularized / Young_Decellularized	Old_Decellularized	Young_Decellularized	80	P62242	17982242	11592883	-0.633334	0.633334	-35.5315	0.644685	0	1.53556e-18	5.47426e-17	79	0.0470678	P62242	RS8_MOUSE	40S ribosomal protein S8	Rps8	P62242	Mus musculus	maturation of SSU-rRNA from tricistronic rRNA transcript (SSU-rRNA, 5.8S rRNA, LSU-rRNA),translation	RNA binding,structural constituent of ribosome	nucleus,endoplasmic reticulum,cytosol,focal adhesion,membrane,cytosolic small ribosomal subunit,intracellular ribonucleoprotein complex,extracellular exosome	sp	1	2	uniprot_mouse_proteome	>sp|P62242|RS8_MOUSE 40S ribosomal protein S8 OS=Mus musculus GN=Rps8 PE=1 SV=2	10	16
TRUE	Old_Decellularized / Young_Decellularized	Old_Decellularized	Young_Decellularized	170	Q8K0E8	4.41763e+06	6703456	0.601634	0.601634	51.7434	1.51743	0	1.9671e-18	6.84165e-17	169	0.11581	Q8K0E8	FIBB_MOUSE	Fibrinogen beta chain	Fgb	Q8K0E8	Mus musculus	adaptive immune response,cell-matrix adhesion,signal transduction,plasminogen activation,positive regulation of heterotypic cell-cell adhesion,fibrinolysis,induction of bacterial agglutination,cellular protein complex assembly,cellular response to leptin stimulus,innate immune response,positive regulation of vasoconstriction,positive regulation of exocytosis,positive regulation of protein secreti…	structural molecule activity,protein binding, bridging,chaperone binding,receptor binding,cell adhesion molecule binding	fibrinogen complex,extracellular space,cell cortex,external side of plasma membrane,cell surface,platelet alpha granule,extracellular exosome,blood microparticle,extracellular vesicle	sp	1	1	uniprot_mouse_proteome	>sp|Q8K0E8|FIBB_MOUSE Fibrinogen beta chain OS=Mus musculus GN=Fgb PE=1 SV=1	25	34
TRUE	Old_Decellularized / Young_Decellularized	Old_Decellularized	Young_Decellularized	215	B2RQC6;E9QAI5	1.33232e+06	755895	-0.817687	0.817687	-43.2649	0.567351	0	5.80647e-18	1.97143e-16	214	0.0689994	B2RQC6;E9QAI5	PYR1_MOUSE;E9QAI5_MOUSE	CAD protein	Cad	B2RQC6;E9QAI5	Mus musculus	urea cycle,liver development,'de novo' pyrimidine nucleobase biosynthetic process,UTP biosynthetic process,arginine biosynthetic process,glutamine metabolic process,heart development,female pregnancy,lactation,response to amine,drug metabolic process,peptidyl-threonine phosphorylation,citrulline biosynthetic process,response to caffeine,animal organ regeneration,response to insulin,response to te…	UTP binding,aspartate carbamoyltransferase activity,carbamoyl-phosphate synthase (ammonia) activity,carbamoyl-phosphate synthase (glutamine-hydrolyzing) activity,dihydroorotase activity,protein kinase activity,ATP binding,zinc ion binding,amino acid binding,enzyme binding,identical protein binding;	nucleus,nucleoplasm,cytoplasm,cytosol,membrane,nuclear matrix,neuronal cell body,terminal bouton,protein complex,extracellular exosome;	sp;tr	1	1	uniprot_mouse_proteome	>sp|B2RQC6|PYR1_MOUSE CAD protein OS=Mus musculus GN=Cad PE=1 SV=1;>tr|E9QAI5|E9QAI5_MOUSE CAD protein OS=Mus musculus GN=Cad PE=1 SV=1	42	43
TRUE	Old_Decellularized / Young_Decellularized	Old_Decellularized	Young_Decellularized	110	G3X8X6;Q62230	360841	547756	0.602169	0.602169	51.7998	1.518	0	8.95774e-18	2.97064e-16	109	0.0948114	G3X8X6;Q62230	G3X8X6_MOUSE;SN_MOUSE	Sialic acid binding Ig-like lectin 1, sialoadhesin, isoform CRA_b;Sialoadhesin	Siglec1	G3X8X6;Q62230	Mus musculus	;endocytosis,cell adhesion,positive regulation of T cell apoptotic process,positive regulation of extrinsic apoptotic signaling pathway	;protein binding,carbohydrate binding	;extracellular region,plasma membrane,integral component of membrane	tr;sp	1	1;2	uniprot_mouse_proteome	>tr|G3X8X6|G3X8X6_MOUSE Sialic acid binding Ig-like lectin 1, sialoadhesin, isoform CRA_b OS=Mus musculus GN=Siglec1 PE=1 SV=1;>sp|Q62230|SN_MOUSE Sialoadhesin OS=Mus musculus GN=Siglec1 PE=1 SV=2	22	22
TRUE	Old_Decellularized / Young_Decellularized	Old_Decellularized	Young_Decellularized	45	P09528	367121	833781	1.18341	1.18341	127.114	2.27114	0	4.775e-17	1.38962e-15	44	0.11404	P09528	FRIH_MOUSE	Ferritin heavy chain	Fth1	P09528	Mus musculus	intracellular sequestering of iron ion,receptor-mediated endocytosis,immune response,negative regulation of cell proliferation,negative regulation of fibroblast proliferation,oxidation-reduction process,iron ion import	ferroxidase activity,iron ion binding,ferric iron binding	extracellular region,nucleus,mitochondrion,autolysosome,extracellular exosome,endocytic vesicle lumen	sp	1	2	uniprot_mouse_proteome	>sp|P09528|FRIH_MOUSE Ferritin heavy chain OS=Mus musculus GN=Fth1 PE=1 SV=2	6	9
TRUE	Old_Decellularized / Young_Decellularized	Old_Decellularized	Young_Decellularized	60	E9PUM4;Q71LX4	180904	300595	0.732597	0.732597	66.1627	1.66163	0	6.42429e-17	1.83221e-15	59	0.0649064	E9PUM4;Q71LX4	E9PUM4_MOUSE;TLN2_MOUSE	Talin-2	Tln2	E9PUM4;Q71LX4	Mus musculus	;cytoskeletal anchoring at plasma membrane,cell adhesion	;structural constituent of cytoskeleton,protein binding,actin filament binding	;ruffle,cytoplasm,cytoskeleton,plasma membrane,fascia adherens,focal adhesion,synapse	tr;sp	1	1;3	uniprot_mouse_proteome	>tr|E9PUM4|E9PUM4_MOUSE Talin-2 OS=Mus musculus GN=Tln2 PE=1 SV=1;>sp|Q71LX4|TLN2_MOUSE Talin-2 OS=Mus musculus GN=Tln2 PE=1 SV=3	12	12
TRUE	Old_Decellularized / Young_Decellularized	Old_Decellularized	Young_Decellularized	75	P16125	4.00738e+06	1.86275e+06	-1.10523	1.10523	-53.517	0.46483	0	2.00135e-16	5.59594e-15	74	0.109291	P16125	LDHB_MOUSE	L-lactate dehydrogenase B chain	Ldhb	P16125	Mus musculus	carbohydrate metabolic process,lactate biosynthetic process from pyruvate,NAD metabolic process,oxidation-reduction process	L-lactate dehydrogenase activity,kinase binding,identical protein binding,NAD binding	mitochondrion,cytosol,membrane,myelin sheath,membrane raft,extracellular exosome	sp	1	2	uniprot_mouse_proteome	>sp|P16125|LDHB_MOUSE L-lactate dehydrogenase B chain OS=Mus musculus GN=Ldhb PE=1 SV=2	11	15
TRUE	Old_Decellularized / Young_Decellularized	Old_Decellularized	Young_Decellularized	65	D3YTN4	437243	663233	0.601083	0.601083	51.6854	1.51685	0	3.87289e-16	1.00413e-14	64	0.0843423	D3YTN4	D3YTN4_MOUSE	GTPase IMAP family member 4	Gimap4	D3YTN4	Mus musculus				tr	1	1	uniprot_mouse_proteome	>tr|D3YTN4|D3YTN4_MOUSE GTPase IMAP family member 4 OS=Mus musculus GN=Gimap4 PE=1 SV=1	12	13
TRUE	Old_Decellularized / Young_Decellularized	Old_Decellularized	Young_Decellularized	85	Q6P5D8	519998	329679	-0.657444	0.657444	-36.5999	0.634001	0	8.45906e-16	2.11625e-14	84	0.0650456	Q6P5D8	SMHD1_MOUSE	Structural maintenance of chromosomes flexible hinge domain-containing protein 1	Smchd1	Q6P5D8	Mus musculus	dosage compensation by inactivation of X chromosome,nose development,chromosome organization,inactivation of X chromosome by DNA methylation	ATP binding,ATPase activity	Barr body,nuclear chromosome, telomeric region	sp	1	2	uniprot_mouse_proteome	>sp|Q6P5D8|SMHD1_MOUSE Structural maintenance of chromosomes flexible hinge domain-containing protein 1 OS=Mus musculus GN=Smchd1 PE=1 SV=2	17	17
TRUE	Old_Decellularized / Young_Decellularized	Old_Decellularized	Young_Decellularized	110	P08226	546275	2.20409e+06	2.01248	2.01248	303.475	4.03475	0	1.60754e-15	3.82059e-14	109	0.216676	P08226	APOE_MOUSE	Apolipoprotein E	Apoe	P08226	Mus musculus	retinoid metabolic process,negative regulation of endothelial cell proliferation,response to dietary excess,lipid metabolic process,triglyceride metabolic process,cholesterol biosynthetic process,cholesterol catabolic process,cellular calcium ion homeostasis,receptor-mediated endocytosis,response to oxidative stress,G-protein coupled receptor signaling pathway,nitric oxide mediated signal transdu…	beta-amyloid binding,lipid transporter activity,protein binding,phospholipid binding,heparin binding,lipid binding,cholesterol binding,antioxidant activity,cholesterol transporter activity,identical protein binding,protein homodimerization activity,metal chelating activity,protein dimerization activity,tau protein binding,low-density lipoprotein particle receptor binding,phosphatidylcholine-stero…	extracellular region,extracellular space,nucleus,endoplasmic reticulum,Golgi apparatus,cytosol,plasma membrane,membrane,extracellular matrix,very-low-density lipoprotein particle,low-density lipoprotein particle,intermediate-density lipoprotein particle,high-density lipoprotein particle,chylomicron,extracellular exosome,blood microparticle,extracellular vesicle,lipoprotein particle,Requires Ontol…	sp	1	2	uniprot_mouse_proteome	>sp|P08226|APOE_MOUSE Apolipoprotein E OS=Mus musculus GN=Apoe PE=1 SV=2	13	22
TRUE	Old_Decellularized / Young_Decellularized	Old_Decellularized	Young_Decellularized	60	Q61699;Q61699-2	564212	363211	-0.635431	0.635431	-35.6251	0.643749	0	5.64353e-15	1.20115e-13	59	0.0712057	Q61699;Q61699-2	HS105_MOUSE	Heat shock protein 105 kDa;Isoform HSP105-beta of Heat shock protein 105 kDa	Hsph1	Q61699;Q61699-2	Mus musculus	receptor-mediated endocytosis,response to unfolded protein,negative regulation of neuron apoptotic process,positive regulation of MHC class I biosynthetic process,positive regulation of transcription from RNA polymerase II promoter,chaperone mediated protein folding requiring cofactor,positive regulation of NK T cell activation,positive regulation of protein tyrosine kinase activity,regulation of…	adenyl-nucleotide exchange factor activity,protein binding,ATP binding,alpha-tubulin binding;	extracellular region,nucleus,nucleoplasm,cytoplasm,cytosol,protein complex,extracellular exosome,microtubule;	sp	1;	2;	uniprot_mouse_proteome	>sp|Q61699|HS105_MOUSE Heat shock protein 105 kDa OS=Mus musculus GN=Hsph1 PE=1 SV=2;>sp|Q61699-2|HS105_MOUSE Isoform HSP105-beta of Heat shock protein 105 kDa OS=Mus musculus GN=Hsph1	12	12
TRUE	Old_Decellularized / Young_Decellularized	Old_Decellularized	Young_Decellularized	40	A2A513;P02535;P02535-2;P02535-3	25911354	12446713	-1.05782	1.05782	-51.9643	0.480357	0	1.11572e-14	2.24087e-13	39	0.0834913	A2A513;P02535;P02535-2;P02535-3	A2A513_MOUSE;K1C10_MOUSE;K1C10_MOUSE;K1C10_MOUSE	Keratin, type I cytoskeletal 10;Keratin, type I cytoskeletal 10;Isoform 2 of Keratin, type I cytoskeletal 10;Isoform 3 of Keratin, type I cytoskeletal 10	Krt10	A2A513;P02535;P02535-2;P02535-3	Mus musculus	;keratinocyte development,epidermis development,epithelial cell differentiation,intermediate filament organization,cellular response to calcium ion;;	;structural molecule activity,protein binding,cytoskeletal protein binding;;	;keratin filament;;	tr;sp;sp;sp	1;1;;	1;3;;	uniprot_mouse_proteome	>tr|A2A513|A2A513_MOUSE Keratin, type I cytoskeletal 10 OS=Mus musculus GN=Krt10 PE=1 SV=1;>sp|P02535|K1C10_MOUSE Keratin, type I cytoskeletal 10 OS=Mus musculus GN=Krt10 PE=1 SV=3;>sp|P02535-2|K1C10_MOUSE Isoform 2 of Keratin, type I cytoskeletal 10 OS=Mus musculus GN=Krt10;>sp|P02535-3|K1C10_MOUSE Isoform 3 of Keratin, type I cytoskeletal 10 OS=Mus musculus GN=Krt10	6	8
TRUE	Old_Decellularized / Young_Decellularized	Old_Decellularized	Young_Decellularized	155	E9PWE8	5360542	3127896	-0.777186	0.777186	-41.6496	0.583504	0	2.19475e-14	4.11804e-13	154	0.0871288	E9PWE8	E9PWE8_MOUSE	Dihydropyrimidinase-related protein 3	Dpysl3	E9PWE8	Mus musculus				tr	1	1	uniprot_mouse_proteome	>tr|E9PWE8|E9PWE8_MOUSE Dihydropyrimidinase-related protein 3 OS=Mus musculus GN=Dpysl3 PE=1 SV=1	23	31
TRUE	Old_Decellularized / Young_Decellularized	Old_Decellularized	Young_Decellularized	80	P18242	2.3912e+06	3.6411e+06	0.606644	0.606644	52.2712	1.52271	0	3.46352e-14	6.33202e-13	79	0.0682635	P18242	CATD_MOUSE	Cathepsin D	Ctsd	P18242	Mus musculus	autophagosome assembly,proteolysis,protein catabolic process,epithelial tube branching involved in lung morphogenesis	aspartic-type endopeptidase activity,peptidase activity,hydrolase activity	extracellular space,mitochondrion,lysosome,melanosome,membrane raft,extracellular exosome,extracellular matrix	sp	1	1	uniprot_mouse_proteome	>sp|P18242|CATD_MOUSE Cathepsin D OS=Mus musculus GN=Ctsd PE=1 SV=1	11	16
TRUE	Old_Decellularized / Young_Decellularized	Old_Decellularized	Young_Decellularized	100	Q6P9K8;Q6P9K8-2	1.52905e+06	2.4989e+06	0.708657	0.708657	63.4282	1.63428	0	4.65188e-14	8.39694e-13	99	0.200908	Q6P9K8;Q6P9K8-2	CSKI1_MOUSE	Caskin-1;Isoform 2 of Caskin-1	Caskin1	Q6P9K8;Q6P9K8-2	Mus musculus	;	identical protein binding;	cytoplasm,membrane;	sp	1;	2;	uniprot_mouse_proteome	>sp|Q6P9K8|CSKI1_MOUSE Caskin-1 OS=Mus musculus GN=Caskin1 PE=1 SV=2;>sp|Q6P9K8-2|CSKI1_MOUSE Isoform 2 of Caskin-1 OS=Mus musculus GN=Caskin1	19	20
TRUE	Old_Decellularized / Young_Decellularized	Old_Decellularized	Young_Decellularized	60	P51885	759419	1358772	0.839335	0.839335	78.9225	1.78923	0	1.09318e-13	1.8558e-12	59	0.0897714	P51885	LUM_MOUSE	Lumican	Lum	P51885	Mus musculus	visual perception,response to organic cyclic compound,collagen fibril organization,positive regulation of transforming growth factor beta1 production,positive regulation of transcription from RNA polymerase II promoter,cartilage development,response to growth factor,axonogenesis	collagen binding	proteinaceous extracellular matrix,fibrillar collagen trimer,extracellular space,extracellular matrix,extracellular exosome	sp	1	2	uniprot_mouse_proteome	>sp|P51885|LUM_MOUSE Lumican OS=Mus musculus GN=Lum PE=1 SV=2	10	12
TRUE	Old_Decellularized / Young_Decellularized	Old_Decellularized	Young_Decellularized	95	E9PYH0;G3XA35	2.05309e+06	1.29776e+06	-0.661776	0.661776	-36.79	0.6321	0	1.23532e-13	2.07243e-12	94	0.170413	E9PYH0;G3XA35	E9PYH0_MOUSE;G3XA35_MOUSE	Versican core protein;MCG116562, isoform CRA_a	Vcan	E9PYH0;G3XA35	Mus musculus	;	;	;	tr	1	1	uniprot_mouse_proteome	>tr|E9PYH0|E9PYH0_MOUSE Versican core protein OS=Mus musculus GN=Vcan PE=1 SV=1;>tr|G3XA35|G3XA35_MOUSE MCG116562, isoform CRA_a OS=Mus musculus GN=Vcan PE=1 SV=1	16	19
TRUE	Old_Decellularized / Young_Decellularized	Old_Decellularized	Young_Decellularized	55	P43276	44095452	17438234	-1.33838	1.33838	-60.4534	0.395466	0	1.32534e-13	2.1976e-12	54	0.112848	P43276	H15_MOUSE	Histone H1.5	Hist1h1b	P43276	Mus musculus	nucleosome assembly,muscle organ development	DNA binding,protein binding	nucleosome,nucleus	sp	1	2	uniprot_mouse_proteome	>sp|P43276|H15_MOUSE Histone H1.5 OS=Mus musculus GN=Hist1h1b PE=1 SV=2	6	11
TRUE	Old_Decellularized / Young_Decellularized	Old_Decellularized	Young_Decellularized	50	P16460	1140230	525352	-1.11797	1.11797	-53.9257	0.460743	0	1.37469e-13	2.25322e-12	49	0.111346	P16460	ASSY_MOUSE	Argininosuccinate synthase	Ass1	P16460	Mus musculus	urea cycle,citrulline metabolic process,argininosuccinate metabolic process,arginine biosynthetic process,aspartate metabolic process,positive regulation of nitric oxide biosynthetic process,cellular response to laminar fluid shear stress,negative regulation of leukocyte cell-cell adhesion	RNA binding,argininosuccinate synthase activity,ATP binding,amino acid binding,identical protein binding	mitochondrion,cytosol,myelin sheath,extracellular exosome	sp	1	1	uniprot_mouse_proteome	>sp|P16460|ASSY_MOUSE Argininosuccinate synthase OS=Mus musculus GN=Ass1 PE=1 SV=1	8	10
TRUE	Old_Decellularized / Young_Decellularized	Old_Decellularized	Young_Decellularized	80	Q61881	852491	259248	-1.71735	1.71735	-69.5894	0.304106	0	4.54505e-13	6.75129e-12	79	0.173001	Q61881	MCM7_MOUSE	DNA replication licensing factor MCM7	Mcm7	Q61881	Mus musculus	DNA unwinding involved in DNA replication,DNA replication initiation,cellular response to DNA damage stimulus,cell cycle,cell proliferation,regulation of phosphorylation,response to drug,cellular response to epidermal growth factor stimulus,cellular response to xenobiotic stimulus	single-stranded DNA binding,protein binding,ATP binding,DNA helicase activity,ATP-dependent DNA helicase activity	nuclear chromosome, telomeric region,nucleus,nucleoplasm,cytosol,membrane,MCM complex	sp	1	1	uniprot_mouse_proteome	>sp|Q61881|MCM7_MOUSE DNA replication licensing factor MCM7 OS=Mus musculus GN=Mcm7 PE=1 SV=1	16	16
TRUE	Old_Decellularized / Young_Decellularized	Old_Decellularized	Young_Decellularized	155	Q9JIK5	1.81236e+06	1082030	-0.74413	0.74413	-40.2972	0.597028	0	4.59837e-13	6.76008e-12	154	0.0696585	Q9JIK5	DDX21_MOUSE	Nucleolar RNA helicase 2	Ddx21	Q9JIK5	Mus musculus	osteoblast differentiation,rRNA processing,transcription from RNA polymerase II promoter,response to virus,RNA secondary structure unwinding,response to exogenous dsRNA	RNA binding,RNA helicase activity,double-stranded RNA binding,ATP-dependent RNA helicase activity,protein binding,ATP binding,rRNA binding,snoRNA binding,miRNA binding,7SK snRNA binding	nucleus,nucleoplasm,nucleolus,cytoplasm,membrane	sp	1	3	uniprot_mouse_proteome	>sp|Q9JIK5|DDX21_MOUSE Nucleolar RNA helicase 2 OS=Mus musculus GN=Ddx21 PE=1 SV=3	27	31
TRUE	Old_Decellularized / Young_Decellularized	Old_Decellularized	Young_Decellularized	75	A2AQN4;A2AQN5;Q9QXG4	608294	1083397	0.832721	0.832721	78.1042	1.78104	0	5.04225e-13	7.26288e-12	74	0.137153	A2AQN4;A2AQN5;Q9QXG4	A2AQN4_MOUSE;A2AQN5_MOUSE;ACSA_MOUSE	Acetyl-coenzyme A synthetase, cytoplasmic;Acetyl-coenzyme A synthetase, cytoplasmic;Acetyl-coenzyme A synthetase, cytoplasmic	Acss2	A2AQN4;A2AQN5;Q9QXG4	Mus musculus	;;acetyl-CoA biosynthetic process,lipid biosynthetic process,acetate biosynthetic process,acetyl-CoA biosynthetic process from acetate,propionate biosynthetic process	;;acetate-CoA ligase activity,ATP binding,AMP binding	;;nucleoplasm,cytoplasm,cytosol,intracellular membrane-bounded organelle	tr;tr;sp	1	1;1;2	uniprot_mouse_proteome	>tr|A2AQN4|A2AQN4_MOUSE Acetyl-coenzyme A synthetase, cytoplasmic OS=Mus musculus GN=Acss2 PE=1 SV=1;>tr|A2AQN5|A2AQN5_MOUSE Acetyl-coenzyme A synthetase, cytoplasmic OS=Mus musculus GN=Acss2 PE=1 SV=1;>sp|Q9QXG4|ACSA_MOUSE Acetyl-coenzyme A synthetase, cytoplasmic OS=Mus musculus GN=Acss2 PE=1 SV=2	13	15
TRUE	Old_Decellularized / Young_Decellularized	Old_Decellularized	Young_Decellularized	140	O08917	1642503	2.4923e+06	0.601581	0.601581	51.7379	1.51738	0	7.62424e-13	1.07645e-11	139	0.114285	O08917	FLOT1_MOUSE	Flotillin-1	Flot1	O08917	Mus musculus	membrane raft assembly,positive regulation of cytokine production,positive regulation of protein phosphorylation,regulation of receptor internalization,endocytosis,axonogenesis,axon guidance,extracellular matrix disassembly,positive regulation of protein binding,positive regulation of synaptic transmission, dopaminergic,positive regulation of interferon-beta production,dsRNA transport,positive re…	protease binding,protein binding,ionotropic glutamate receptor binding,protein heterodimerization activity	uropod,lysosomal membrane,endosome,early endosome,microtubule organizing center,plasma membrane,caveola,cell-cell junction,cell-cell adherens junction,focal adhesion,membrane,basolateral plasma membrane,flotillin complex,lamellipodium,cytoplasmic vesicle,centriolar satellite,sarcolemma,melanosome,cell-cell contact zone,plasma membrane raft,membrane raft,extracellular exosome,COP9 signalosome,cort…	sp	1	1	uniprot_mouse_proteome	>sp|O08917|FLOT1_MOUSE Flotillin-1 OS=Mus musculus GN=Flot1 PE=1 SV=1	20	28
TRUE	Old_Decellularized / Young_Decellularized	Old_Decellularized	Young_Decellularized	55	Q3U125;Q9CYH2	2.97313e+06	1.93833e+06	-0.617173	0.617173	-34.8053	0.651947	0	2.55314e-12	3.43469e-11	54	0.0676231	Q3U125;Q9CYH2	Q3U125_MOUSE;F213A_MOUSE	Redox-regulatory protein FAM213A	Fam213a	Q3U125;Q9CYH2	Mus musculus	;regulation of osteoclast differentiation,oxidation-reduction process,cellular oxidant detoxification	;antioxidant activity	;cytoplasm,mitochondrion,extracellular exosome	tr;sp	1	1;2	uniprot_mouse_proteome	>tr|Q3U125|Q3U125_MOUSE Redox-regulatory protein FAM213A OS=Mus musculus GN=Fam213a PE=1 SV=1;>sp|Q9CYH2|F213A_MOUSE Redox-regulatory protein FAM213A OS=Mus musculus GN=Fam213a PE=1 SV=2	8	11
TRUE	Old_Decellularized / Young_Decellularized	Old_Decellularized	Young_Decellularized	145	E9PZD8;G3X8Q5;G3X9T8;Q61147	279538	597208	1.09519	1.09519	113.641	2.13641	0	3.30141e-12	4.35908e-11	144	0.229883	E9PZD8;G3X8Q5;G3X9T8;Q61147	E9PZD8_MOUSE;G3X8Q5_MOUSE;G3X9T8_MOUSE;CERU_MOUSE	Ceruloplasmin	Cp	E9PZD8;G3X8Q5;G3X9T8;Q61147	Mus musculus	;;;copper ion transport,cellular iron ion homeostasis,oxidation-reduction process	;;;ferroxidase activity,copper ion binding,chaperone binding	;;;extracellular space,lysosomal membrane,extracellular exosome,blood microparticle	tr;tr;tr;sp	1	1;1;1;2	uniprot_mouse_proteome	>tr|E9PZD8|E9PZD8_MOUSE Ceruloplasmin OS=Mus musculus GN=Cp PE=1 SV=1;>tr|G3X8Q5|G3X8Q5_MOUSE Ceruloplasmin OS=Mus musculus GN=Cp PE=1 SV=1;>tr|G3X9T8|G3X9T8_MOUSE Ceruloplasmin OS=Mus musculus GN=Cp PE=1 SV=1;>sp|Q61147|CERU_MOUSE Ceruloplasmin OS=Mus musculus GN=Cp PE=1 SV=2	25	29
TRUE	Old_Decellularized / Young_Decellularized	Old_Decellularized	Young_Decellularized	30	Q91V64	904618	514455	-0.814265	0.814265	-43.1302	0.568698	0	4.80323e-12	6.22673e-11	29	0.0716106	Q91V64	ISOC1_MOUSE	Isochorismatase domain-containing protein 1	Isoc1	Q91V64	Mus musculus	biological_process,metabolic process	molecular_function,catalytic activity	cytoplasm,peroxisome,extracellular exosome	sp	1	1	uniprot_mouse_proteome	>sp|Q91V64|ISOC1_MOUSE Isochorismatase domain-containing protein 1 OS=Mus musculus GN=Isoc1 PE=1 SV=1	5	6
TRUE	Old_Decellularized / Young_Decellularized	Old_Decellularized	Young_Decellularized	55	Q9CWU5-2	608510	93494.7	-2.70232	2.70232	-84.6355	0.153645	0	6.69425e-12	8.37368e-11	54	0.343624	Q9CWU5-2	KHDC3_MOUSE	Isoform 2 of KH domain-containing protein 3	Khdc3	Q9CWU5-2	Mus musculus				sp			uniprot_mouse_proteome	>sp|Q9CWU5-2|KHDC3_MOUSE Isoform 2 of KH domain-containing protein 3 OS=Mus musculus GN=Khdc3	11	11
TRUE	Old_Decellularized / Young_Decellularized	Old_Decellularized	Young_Decellularized	60	E9QKZ2;Q91YE6	501009	330951	-0.598219	0.598219	-33.9431	0.660569	0	9.8734e-12	1.19317e-10	59	0.0825585	E9QKZ2;Q91YE6	E9QKZ2_MOUSE;IPO9_MOUSE	Importin-9	Ipo9	E9QKZ2;Q91YE6	Mus musculus	;protein import into nucleus,ribosomal protein import into nucleus,ribosome biogenesis,protein stabilization	;Ran GTPase binding,protein transporter activity,histone binding	;nuclear envelope,cytoplasm,cytosol,membrane	tr;sp	1	1;3	uniprot_mouse_proteome	>tr|E9QKZ2|E9QKZ2_MOUSE Importin-9 OS=Mus musculus GN=Ipo9 PE=1 SV=1;>sp|Q91YE6|IPO9_MOUSE Importin-9 OS=Mus musculus GN=Ipo9 PE=1 SV=3	10	12
TRUE	Old_Decellularized / Young_Decellularized	Old_Decellularized	Young_Decellularized	110	E9PV24;E9PV24-2	3.74837e+06	5642377	0.59004	0.59004	50.5289	1.50529	0	1.24395e-11	1.47822e-10	109	0.105508	E9PV24;E9PV24-2	FIBA_MOUSE	Fibrinogen alpha chain;Isoform 2 of Fibrinogen alpha chain	Fga	E9PV24;E9PV24-2	Mus musculus	adaptive immune response,protein complex assembly,cell-matrix adhesion,signal transduction,blood coagulation,plasminogen activation,positive regulation of heterotypic cell-cell adhesion,fibrinolysis,induction of bacterial agglutination,cellular protein complex assembly,innate immune response,positive regulation of vasoconstriction,positive regulation of exocytosis,positive regulation of protein s…	structural molecule activity,protein binding, bridging,metal ion binding,receptor binding,cell adhesion molecule binding;	fibrinogen complex,extracellular space,cell cortex,external side of plasma membrane,cell surface,platelet alpha granule,extracellular exosome,blood microparticle,extracellular vesicle;	sp	1;	1;	uniprot_mouse_proteome	>sp|E9PV24|FIBA_MOUSE Fibrinogen alpha chain OS=Mus musculus GN=Fga PE=1 SV=1;>sp|E9PV24-2|FIBA_MOUSE Isoform 2 of Fibrinogen alpha chain OS=Mus musculus GN=Fga	16	22
TRUE	Old_Decellularized / Young_Decellularized	Old_Decellularized	Young_Decellularized	90	Q62005	11055217	6.19887e+06	-0.834649	0.834649	-43.9281	0.560719	0	1.44946e-11	1.6942e-10	89	0.161824	Q62005	ZP1_MOUSE	Zona pellucida sperm-binding protein 1	Zp1	Q62005	Mus musculus	single fertilization		proteinaceous extracellular matrix,plasma membrane,integral component of membrane,extracellular matrix,Golgi apparatus,secretory granule	sp	1	1	uniprot_mouse_proteome	>sp|Q62005|ZP1_MOUSE Zona pellucida sperm-binding protein 1 OS=Mus musculus GN=Zp1 PE=1 SV=1	12	18
TRUE	Old_Decellularized / Young_Decellularized	Old_Decellularized	Young_Decellularized	175	O70423	11984635	6047900	-0.98668	0.98668	-49.5362	0.504638	0	1.94091e-11	2.23205e-10	174	0.0846288	O70423	AOC3_MOUSE	Membrane primary amine oxidase	Aoc3	O70423	Mus musculus	cell adhesion,amine metabolic process,response to antibiotic,oxidation-reduction process,negative regulation of primary amine oxidase activity	copper ion binding,calcium ion binding,primary amine oxidase activity,protein heterodimerization activity,quinone binding,tryptamine:oxygen oxidoreductase (deaminating) activity,aminoacetone:oxygen oxidoreductase(deaminating) activity,aliphatic-amine oxidase activity,phenethylamine:oxygen oxidoreductase (deaminating) activity	cytoplasm,early endosome,endoplasmic reticulum,Golgi apparatus,plasma membrane,microvillus,cell surface,integral component of membrane	sp	1	3	uniprot_mouse_proteome	>sp|O70423|AOC3_MOUSE Membrane primary amine oxidase OS=Mus musculus GN=Aoc3 PE=1 SV=3	23	35
TRUE	Old_Decellularized / Young_Decellularized	Old_Decellularized	Young_Decellularized	75	P25206	535877	265372	-1.01389	1.01389	-50.4789	0.495211	0	2.70833e-11	3.04101e-10	74	0.17039	P25206	MCM3_MOUSE	DNA replication licensing factor MCM3	Mcm3	P25206	Mus musculus	DNA replication initiation,cell cycle	DNA binding,helicase activity,ATP binding	nuclear chromosome, telomeric region,nucleus,nucleoplasm,cytoplasm,centrosome,membrane,MCM complex,perinuclear region of cytoplasm	sp	1	2	uniprot_mouse_proteome	>sp|P25206|MCM3_MOUSE DNA replication licensing factor MCM3 OS=Mus musculus GN=Mcm3 PE=1 SV=2	13	15
TRUE	Old_Decellularized / Young_Decellularized	Old_Decellularized	Young_Decellularized	55	E9Q5C9	786012	457993	-0.779225	0.779225	-41.732	0.58268	0	5.8032e-11	6.31707e-10	54	0.0890366	E9Q5C9	E9Q5C9_MOUSE	Protein Nolc1	Nolc1	E9Q5C9	Mus musculus	regulation of translation,nucleolus organization,neural crest formation,neural crest cell development	RNA polymerase I core binding,RNA binding,protein heterodimerization activity	nucleoplasm,nucleolus,cytoplasm,Cajal body,small nuclear ribonucleoprotein complex	tr	1	1	uniprot_mouse_proteome	>tr|E9Q5C9|E9Q5C9_MOUSE Protein Nolc1 OS=Mus musculus GN=Nolc1 PE=1 SV=1	10	11
TRUE	Old_Decellularized / Young_Decellularized	Old_Decellularized	Young_Decellularized	70	Q922J9;Q922J9-4	1.35418e+06	861752	-0.65207	0.65207	-36.3634	0.636366	0	7.13802e-11	7.59613e-10	69	0.0708959	Q922J9;Q922J9-4	FACR1_MOUSE	Fatty acyl-CoA reductase 1;Isoform 4 of Fatty acyl-CoA reductase 1	Far1	Q922J9;Q922J9-4	Mus musculus	ether lipid biosynthetic process,wax biosynthetic process,long-chain fatty-acyl-CoA metabolic process,glycerophospholipid biosynthetic process,oxidation-reduction process;	fatty-acyl-CoA reductase (alcohol-forming) activity,Requires Ontology;	peroxisome,peroxisomal membrane,integral component of peroxisomal membrane;	sp	1;	1;	uniprot_mouse_proteome	>sp|Q922J9|FACR1_MOUSE Fatty acyl-CoA reductase 1 OS=Mus musculus GN=Far1 PE=1 SV=1;>sp|Q922J9-4|FACR1_MOUSE Isoform 4 of Fatty acyl-CoA reductase 1 OS=Mus musculus GN=Far1	14	14
TRUE	Old_Decellularized / Young_Decellularized	Old_Decellularized	Young_Decellularized	40	P62900	11083783	7329985	-0.596568	0.596568	-33.8675	0.661325	0	7.26781e-11	7.67696e-10	39	0.0630833	P62900	RL31_MOUSE	60S ribosomal protein L31	Rpl31	P62900	Mus musculus	cytoplasmic translation	RNA binding,structural constituent of ribosome,protein binding	focal adhesion,membrane,cytosolic large ribosomal subunit,extracellular exosome	sp	1	1	uniprot_mouse_proteome	>sp|P62900|RL31_MOUSE 60S ribosomal protein L31 OS=Mus musculus GN=Rpl31 PE=1 SV=1	6	8
TRUE	Old_Decellularized / Young_Decellularized	Old_Decellularized	Young_Decellularized	35	L7N1W9;Q66X05	387436	63844	-2.60133	2.60133	-83.5214	0.164786	0	9.54754e-11	9.9326e-10	34	0.359572	L7N1W9;Q66X05	L7N1W9_MOUSE;NAL4F_MOUSE	NACHT, LRR and PYD domains-containing protein 4F;NACHT, LRR and PYD domains-containing protein 4F	Nlrp4f	L7N1W9;Q66X05	Mus musculus	;inflammatory response,biological_process	;molecular_function,ATP binding	;cellular_component	tr;sp	4;2	1	uniprot_mouse_proteome	>tr|L7N1W9|L7N1W9_MOUSE NACHT, LRR and PYD domains-containing protein 4F OS=Mus musculus GN=Nlrp4f PE=4 SV=1;>sp|Q66X05|NAL4F_MOUSE NACHT, LRR and PYD domains-containing protein 4F OS=Mus musculus GN=Nlrp4f PE=2 SV=1	7	7
TRUE	Old_Decellularized / Young_Decellularized	Old_Decellularized	Young_Decellularized	60	Q52KC3	741848	388907	-0.931697	0.931697	-47.5759	0.524241	0	1.16926e-10	1.18253e-09	59	0.180514	Q52KC3	Q52KC3_MOUSE	DNA helicase	Mcm5	Q52KC3	Mus musculus				tr	1	1	uniprot_mouse_proteome	>tr|Q52KC3|Q52KC3_MOUSE DNA helicase OS=Mus musculus GN=Mcm5 PE=1 SV=1	12	12
TRUE	Old_Decellularized / Young_Decellularized	Old_Decellularized	Young_Decellularized	50	A0A075B5P6;A0A075B6A0;P01872;P01872-2	188861	644376	1.77058	1.77058	241.19	3.4119	0	1.20315e-10	1.20823e-09	49	0.222491	A0A075B5P6;A0A075B6A0;P01872;P01872-2	A0A075B5P6_MOUSE;A0A075B6A0_MOUSE;IGHM_MOUSE;IGHM_MOUSE	Ig mu chain C region (Fragment);Ig mu chain C region (Fragment);Ig mu chain C region;Isoform 2 of Ig mu chain C region	Ighm	A0A075B5P6;A0A075B6A0;P01872;P01872-2	Mus musculus	;;activation of MAPK activity,B cell affinity maturation,humoral immune response mediated by circulating immunoglobulin,regulation of immunoglobulin production,phagocytosis, recognition,phagocytosis, engulfment,complement activation, classical pathway,immunoglobulin mediated immune response,antigen processing and presentation,regulation of cell morphogenesis,positive regulation of B cell prolifer…	;;antigen binding,transmembrane signaling receptor activity,protein binding,immunoglobulin receptor binding,identical protein binding;	;;extracellular space,cytosol,plasma membrane,external side of plasma membrane,cell surface,membrane,integral component of membrane,B cell receptor complex,immunoglobulin complex, circulating,perinuclear region of cytoplasm,blood microparticle;	tr;tr;sp;sp	1;1;1;	1;2;2;	uniprot_mouse_proteome	>tr|A0A075B5P6|A0A075B5P6_MOUSE Ig mu chain C region (Fragment) OS=Mus musculus GN=Ighm PE=1 SV=1;>tr|A0A075B6A0|A0A075B6A0_MOUSE Ig mu chain C region (Fragment) OS=Mus musculus GN=Ighm PE=1 SV=2;>sp|P01872|IGHM_MOUSE Ig mu chain C region OS=Mus musculus GN=Ighm PE=1 SV=2;>sp|P01872-2|IGHM_MOUSE Isoform 2 of Ig mu chain C region OS=Mus musculus GN=Ighm	10	10
TRUE	Old_Decellularized / Young_Decellularized	Old_Decellularized	Young_Decellularized	75	Q8VDF2;Q8VDF2-2	714784	187796	-1.92834	1.92834	-73.7269	0.262731	0	1.49095e-10	1.46627e-09	74	0.36396	Q8VDF2;Q8VDF2-2	UHRF1_MOUSE	E3 ubiquitin-protein ligase UHRF1;Isoform 2 of E3 ubiquitin-protein ligase UHRF1	Uhrf1	Q8VDF2;Q8VDF2-2	Mus musculus	negative regulation of transcription from RNA polymerase II promoter,DNA repair,transcription, DNA-templated,cell cycle,cell proliferation,maintenance of DNA methylation,histone monoubiquitination,histone ubiquitination,positive regulation of cellular protein metabolic process,DNA methylation on cytosine,protein ubiquitination involved in ubiquitin-dependent protein catabolic process,protein auto…	core promoter proximal region sequence-specific DNA binding,ubiquitin-protein transferase activity,protein binding,zinc ion binding,methyl-CpG binding,nucleosomal histone binding,methylated histone binding,histone binding,identical protein binding,hemi-methylated DNA-binding,ubiquitin protein ligase activity;	nuclear chromatin,euchromatin,heterochromatin,nucleus,nucleoplasm,replication fork,nuclear heterochromatin,nuclear matrix;	sp	1;	2;	uniprot_mouse_proteome	>sp|Q8VDF2|UHRF1_MOUSE E3 ubiquitin-protein ligase UHRF1 OS=Mus musculus GN=Uhrf1 PE=1 SV=2;>sp|Q8VDF2-2|UHRF1_MOUSE Isoform 2 of E3 ubiquitin-protein ligase UHRF1 OS=Mus musculus GN=Uhrf1	14	15
TRUE	Old_Decellularized / Young_Decellularized	Old_Decellularized	Young_Decellularized	90	P37804	2.17425e+06	1.44876e+06	-0.585703	0.585703	-33.3675	0.666325	0	1.90958e-10	1.8399e-09	89	0.0763359	P37804	TAGL_MOUSE	Transgelin	Tagln	P37804	Mus musculus	epithelial cell differentiation,cytoskeleton organization	actin filament binding	cytoplasm	sp	1	3	uniprot_mouse_proteome	>sp|P37804|TAGL_MOUSE Transgelin OS=Mus musculus GN=Tagln PE=1 SV=3	13	18
TRUE	Old_Decellularized / Young_Decellularized	Old_Decellularized	Young_Decellularized	75	Q80ZX8;Q80ZX8-2;Q80ZX8-3	144167	481212	1.73894	1.73894	233.789	3.33789	0	2.17938e-10	2.08577e-09	74	0.365637	Q80ZX8;Q80ZX8-2;Q80ZX8-3	SPAG1_MOUSE	Sperm-associated antigen 1;Isoform 2 of Sperm-associated antigen 1;Isoform 3 of Sperm-associated antigen 1	Spag1	Q80ZX8;Q80ZX8-2;Q80ZX8-3	Mus musculus	single fertilization,axonemal dynein complex assembly;;	GTP binding,hydrolase activity;;	cytoplasm,cytosol;;	sp	1;;	1;;	uniprot_mouse_proteome	>sp|Q80ZX8|SPAG1_MOUSE Sperm-associated antigen 1 OS=Mus musculus GN=Spag1 PE=1 SV=1;>sp|Q80ZX8-2|SPAG1_MOUSE Isoform 2 of Sperm-associated antigen 1 OS=Mus musculus GN=Spag1;>sp|Q80ZX8-3|SPAG1_MOUSE Isoform 3 of Sperm-associated antigen 1 OS=Mus musculus GN=Spag1	11	15
TRUE	Old_Decellularized / Young_Decellularized	Old_Decellularized	Young_Decellularized	50	Q61753	805473	412100	-0.96684	0.96684	-48.8375	0.511625	0	2.80363e-10	2.61306e-09	49	0.116403	Q61753	SERA_MOUSE	D-3-phosphoglycerate dehydrogenase	Phgdh	Q61753	Mus musculus	glutamine metabolic process,glycine metabolic process,L-serine metabolic process,L-serine biosynthetic process,threonine metabolic process,gamma-aminobutyric acid metabolic process,regulation of gene expression,taurine metabolic process,spinal cord development,glial cell development,neural tube development,neurogenesis,neuron projection development,oxidation-reduction process,G1 to G0 transition	phosphoglycerate dehydrogenase activity,NAD binding	myelin sheath,extracellular exosome	sp	1	3	uniprot_mouse_proteome	>sp|Q61753|SERA_MOUSE D-3-phosphoglycerate dehydrogenase OS=Mus musculus GN=Phgdh PE=1 SV=3	10	10
TRUE	Old_Decellularized / Young_Decellularized	Old_Decellularized	Young_Decellularized	85	Q9CSH3	605231	371218	-0.705218	0.705218	-38.665	0.61335	0	3.12284e-10	2.87301e-09	84	0.0963092	Q9CSH3	RRP44_MOUSE	Exosome complex exonuclease RRP44	Dis3	Q9CSH3	Mus musculus	rRNA processing,RNA catabolic process,rRNA catabolic process,positive regulation of GTPase activity,CUT catabolic process,RNA phosphodiester bond hydrolysis, exonucleolytic	3'-5'-exoribonuclease activity,RNA binding,endonuclease activity,guanyl-nucleotide exchange factor activity	nuclear exosome (RNase complex),exosome (RNase complex),nucleus,nucleoplasm,nucleolus,cytosol,membrane	sp	1	4	uniprot_mouse_proteome	>sp|Q9CSH3|RRP44_MOUSE Exosome complex exonuclease RRP44 OS=Mus musculus GN=Dis3 PE=1 SV=4	15	17
TRUE	Old_Decellularized / Young_Decellularized	Old_Decellularized	Young_Decellularized	35	Q91X76	536937	243468	-1.14102	1.14102	-54.6562	0.453438	0	4.35084e-10	3.92677e-09	34	0.142175	Q91X76	Q91X76_MOUSE	5'-nucleotidase domain containing 2	Nt5dc2	Q91X76	Mus musculus	dephosphorylation	5'-nucleotidase activity,metal ion binding	cellular_component	tr	1	1	uniprot_mouse_proteome	>tr|Q91X76|Q91X76_MOUSE 5'-nucleotidase domain containing 2 OS=Mus musculus GN=Nt5dc2 PE=1 SV=1	7	7
TRUE	Old_Decellularized / Young_Decellularized	Old_Decellularized	Young_Decellularized	40	Q9CQB4;Q9D855	887531	1.75928e+06	0.987113	0.987113	98.2215	1.98221	0	5.06546e-10	4.51459e-09	39	0.14828	Q9CQB4;Q9D855	Q9CQB4_MOUSE;QCR7_MOUSE	Cytochrome b-c1 complex subunit 7	Uqcrb	Q9CQB4;Q9D855	Mus musculus	;mitochondrial electron transport, ubiquinol to cytochrome c,aerobic respiration,mitochondrial respiratory chain complex III assembly,hydrogen ion transmembrane transport	;ubiquinol-cytochrome-c reductase activity	;mitochondrion,mitochondrial inner membrane,mitochondrial respiratory chain complex III	tr;sp	1	1;3	uniprot_mouse_proteome	>tr|Q9CQB4|Q9CQB4_MOUSE Cytochrome b-c1 complex subunit 7 OS=Mus musculus GN=Uqcrb PE=1 SV=1;>sp|Q9D855|QCR7_MOUSE Cytochrome b-c1 complex subunit 7 OS=Mus musculus GN=Uqcrb PE=1 SV=3	7	8
TRUE	Old_Decellularized / Young_Decellularized	Old_Decellularized	Young_Decellularized	80	Q9CPY7;Q9CPY7-2	998408	648386	-0.622776	0.622776	-35.058	0.64942	0	7.37001e-10	6.36948e-09	79	0.0692618	Q9CPY7;Q9CPY7-2	AMPL_MOUSE	Cytosol aminopeptidase;Isoform 2 of Cytosol aminopeptidase	Lap3	Q9CPY7;Q9CPY7-2	Mus musculus	proteolysis;	aminopeptidase activity,peptidase activity,metalloexopeptidase activity,manganese ion binding;	nucleus,nucleoplasm,mitochondrion,trans-Golgi network,cytosol,focal adhesion,midbody,extracellular exosome;	sp	1;	3;	uniprot_mouse_proteome	>sp|Q9CPY7|AMPL_MOUSE Cytosol aminopeptidase OS=Mus musculus GN=Lap3 PE=1 SV=3;>sp|Q9CPY7-2|AMPL_MOUSE Isoform 2 of Cytosol aminopeptidase OS=Mus musculus GN=Lap3	14	16
TRUE	Old_Decellularized / Young_Decellularized	Old_Decellularized	Young_Decellularized	45	Q8VI75	513060	304811	-0.751214	0.751214	-40.5896	0.594104	0	7.89376e-10	6.78102e-09	44	0.114636	Q8VI75	IPO4_MOUSE	Importin-4	Ipo4	Q8VI75	Mus musculus	protein import into nucleus, translocation,DNA replication-dependent nucleosome assembly,DNA replication-independent nucleosome assembly,NLS-bearing protein import into nucleus,ribosomal protein import into nucleus,ribosome biogenesis	protein binding,nuclear localization sequence binding,Ran GTPase binding,protein transporter activity	nuclear chromatin,cytoplasm,membrane,nuclear membrane,nuclear periphery,protein complex	sp	1	1	uniprot_mouse_proteome	>sp|Q8VI75|IPO4_MOUSE Importin-4 OS=Mus musculus GN=Ipo4 PE=1 SV=1	9	9
TRUE	Old_Decellularized / Young_Decellularized	Old_Decellularized	Young_Decellularized	140	P07901	8.24949e+06	4.77372e+06	-0.789193	0.789193	-42.1332	0.578668	0	8.9095e-10	7.56247e-09	139	0.0628935	P07901	HS90A_MOUSE	Heat shock protein HSP 90-alpha	Hsp90aa1	P07901	Mus musculus	nitric oxide biosynthetic process,response to unfolded protein,telomere maintenance via telomerase,response to heat,response to cold,peptidyl-tyrosine phosphorylation,regulation of protein ubiquitination,protein refolding,protein import into mitochondrial outer membrane,positive regulation of nitric oxide biosynthetic process,positive regulation of cytotoxic T cell differentiation,response to ant…	RNA binding,protein tyrosine kinase activity,protein binding,ATP binding,ATPase activity,MHC class II protein complex binding,nitric-oxide synthase regulator activity,TPR domain binding,identical protein binding,protein homodimerization activity,histone deacetylase binding,GTPase binding,unfolded protein binding,DNA polymerase binding,disordered domain specific binding,protein tyrosine kinase bin…	intracellular,nucleus,cytoplasm,cytosol,membrane,ruffle membrane,melanosome,myelin sheath,protein complex,extracellular exosome	sp	1	4	uniprot_mouse_proteome	>sp|P07901|HS90A_MOUSE Heat shock protein HSP 90-alpha OS=Mus musculus GN=Hsp90aa1 PE=1 SV=4	19	28
TRUE	Old_Decellularized / Young_Decellularized	Old_Decellularized	Young_Decellularized	60	Q9Z1T2	492897	221738	-1.15243	1.15243	-55.0133	0.449867	0	1.17795e-09	9.766e-09	59	0.194061	Q9Z1T2	TSP4_MOUSE	Thrombospondin-4	Thbs4	Q9Z1T2	Mus musculus	positive regulation of endothelial cell proliferation,response to unfolded protein,regulation of receptor activity,negative regulation of angiogenesis,regulation of tissue remodeling,response to endoplasmic reticulum stress,behavioral response to pain,tissue remodeling,positive regulation of peptidyl-tyrosine phosphorylation,myoblast migration,positive regulation of cell division,endothelial cell…	integrin binding,calcium ion binding,protein binding,growth factor activity,heparin binding	basement membrane,extracellular space,endoplasmic reticulum,sarcoplasmic reticulum,extracellular matrix,extracellular exosome	sp	1	1	uniprot_mouse_proteome	>sp|Q9Z1T2|TSP4_MOUSE Thrombospondin-4 OS=Mus musculus GN=Thbs4 PE=1 SV=1	11	12
TRUE	Old_Decellularized / Young_Decellularized	Old_Decellularized	Young_Decellularized	95	D3YVL0;D3Z3E8;E9PW39;P23249	521760	298709	-0.804646	0.804646	-42.7498	0.572502	0	1.87336e-09	1.50079e-08	94	0.121037	D3YVL0;D3Z3E8;E9PW39;P23249	D3YVL0_MOUSE;D3Z3E8_MOUSE;E9PW39_MOUSE;MOV10_MOUSE	Putative helicase MOV-10	Mov10	D3YVL0;D3Z3E8;E9PW39;P23249	Mus musculus	;;;gene silencing by miRNA,mRNA cleavage involved in gene silencing by miRNA	;;;RNA binding,helicase activity,protein binding,ATP binding	;;;cytoplasmic mRNA processing body,extracellular space,cytosol	tr;tr;tr;sp	1	2;1;1;2	uniprot_mouse_proteome	>tr|D3YVL0|D3YVL0_MOUSE Putative helicase MOV-10 OS=Mus musculus GN=Mov10 PE=1 SV=2;>tr|D3Z3E8|D3Z3E8_MOUSE Putative helicase MOV-10 OS=Mus musculus GN=Mov10 PE=1 SV=1;>tr|E9PW39|E9PW39_MOUSE Putative helicase MOV-10 OS=Mus musculus GN=Mov10 PE=1 SV=1;>sp|P23249|MOV10_MOUSE Putative helicase MOV-10 OS=Mus musculus GN=Mov10 PE=1 SV=2	18	19
TRUE	Old_Decellularized / Young_Decellularized	Old_Decellularized	Young_Decellularized	30	Q6ZQM8	191303	379662	0.988856	0.988856	98.461	1.98461	0	2.24607e-09	1.76956e-08	29	0.130113	Q6ZQM8	UD17C_MOUSE	UDP-glucuronosyltransferase 1-7C	Ugt1a7c	Q6ZQM8	Mus musculus	flavonoid glucuronidation,xenobiotic glucuronidation	glucuronosyltransferase activity	endoplasmic reticulum membrane,integral component of membrane,intracellular membrane-bounded organelle	sp	1	1	uniprot_mouse_proteome	>sp|Q6ZQM8|UD17C_MOUSE UDP-glucuronosyltransferase 1-7C OS=Mus musculus GN=Ugt1a7c PE=1 SV=1	5	6
TRUE	Old_Decellularized / Young_Decellularized	Old_Decellularized	Young_Decellularized	40	Q8CGB6;Q8CGB6-2;Q8CGB6-3;Q8CGB6-4	180390	290434	0.687096	0.687096	61.0039	1.61004	0	3.32554e-09	2.48284e-08	39	0.116003	Q8CGB6;Q8CGB6-2;Q8CGB6-3;Q8CGB6-4	TNS2_MOUSE	Tensin-2;Isoform 2 of Tensin-2;Isoform 3 of Tensin-2;Isoform 4 of Tensin-2	Tns2	Q8CGB6;Q8CGB6-2;Q8CGB6-3;Q8CGB6-4	Mus musculus	kidney development,protein dephosphorylation,negative regulation of cell proliferation,response to muscle activity,cellular homeostasis,collagen metabolic process,multicellular organism growth,intracellular signal transduction,multicellular organismal homeostasis;;;	phosphoprotein phosphatase activity,receptor binding,kinase binding,protein kinase binding,metal ion binding;;;	intracellular,plasma membrane,focal adhesion;;;	sp	1;;;	1;;;	uniprot_mouse_proteome	>sp|Q8CGB6|TNS2_MOUSE Tensin-2 OS=Mus musculus GN=Tns2 PE=1 SV=1;>sp|Q8CGB6-2|TNS2_MOUSE Isoform 2 of Tensin-2 OS=Mus musculus GN=Tns2;>sp|Q8CGB6-3|TNS2_MOUSE Isoform 3 of Tensin-2 OS=Mus musculus GN=Tns2;>sp|Q8CGB6-4|TNS2_MOUSE Isoform 4 of Tensin-2 OS=Mus musculus GN=Tns2	8	8
TRUE	Old_Decellularized / Young_Decellularized	Old_Decellularized	Young_Decellularized	70	Q9CZS1	1.15973e+06	677007	-0.776549	0.776549	-41.6238	0.583762	0	4.74335e-09	3.36518e-08	69	0.151007	Q9CZS1	AL1B1_MOUSE	Aldehyde dehydrogenase X, mitochondrial	Aldh1b1	Q9CZS1	Mus musculus	ethanol catabolic process,oxidation-reduction process	aldehyde dehydrogenase (NAD) activity	nucleoplasm,mitochondrion,mitochondrial matrix,intracellular membrane-bounded organelle	sp	1	1	uniprot_mouse_proteome	>sp|Q9CZS1|AL1B1_MOUSE Aldehyde dehydrogenase X, mitochondrial OS=Mus musculus GN=Aldh1b1 PE=1 SV=1	13	14
TRUE	Old_Decellularized / Young_Decellularized	Old_Decellularized	Young_Decellularized	45	P43275	10351311	4.69339e+06	-1.14111	1.14111	-54.659	0.45341	0	4.85049e-09	3.42416e-08	44	0.117825	P43275	H11_MOUSE	Histone H1.1	Hist1h1a	P43275	Mus musculus	nucleosome assembly,spermatogenesis,positive regulation of receptor-mediated endocytosis	DNA binding,protein binding,heparin binding,chromatin DNA binding	nucleosome,nucleus,nuclear euchromatin,cell surface,vesicle	sp	1	2	uniprot_mouse_proteome	>sp|P43275|H11_MOUSE Histone H1.1 OS=Mus musculus GN=Hist1h1a PE=1 SV=2	6	9
TRUE	Old_Decellularized / Young_Decellularized	Old_Decellularized	Young_Decellularized	40	Q9DB60	918389	1.39447e+06	0.60254	0.60254	51.8387	1.51839	0	5.12569e-09	3.60061e-08	39	0.133453	Q9DB60	PGFS_MOUSE	Prostamide/prostaglandin F synthase	Fam213b	Q9DB60	Mus musculus	prostaglandin biosynthetic process,cyclooxygenase pathway,oxidation-reduction process,cellular oxidant detoxification	thioredoxin peroxidase activity,antioxidant activity,oxidoreductase activity, acting on the CH-OH group of donors, NAD or NADP as acceptor,prostaglandin-F synthase activity	cytoplasm,endoplasmic reticulum,cytosol,myelin sheath,extracellular exosome	sp	1	1	uniprot_mouse_proteome	>sp|Q9DB60|PGFS_MOUSE Prostamide/prostaglandin F synthase OS=Mus musculus GN=Fam213b PE=1 SV=1	8	8
TRUE	Old_Decellularized / Young_Decellularized	Old_Decellularized	Young_Decellularized	65	Q9WV54	407696	611895	0.58579	0.58579	50.0861	1.50086	0	6.61589e-09	4.5357e-08	64	0.174752	Q9WV54	ASAH1_MOUSE	Acid ceramidase	Asah1	Q9WV54	Mus musculus	lipid metabolic process	ceramidase activity	extracellular space,lysosome,extracellular exosome	sp	1	1	uniprot_mouse_proteome	>sp|Q9WV54|ASAH1_MOUSE Acid ceramidase OS=Mus musculus GN=Asah1 PE=1 SV=1	12	13
TRUE	Old_Decellularized / Young_Decellularized	Old_Decellularized	Young_Decellularized	40	P56391	2.44156e+06	4456408	0.868077	0.868077	82.5228	1.82523	0	6.68737e-09	4.54625e-08	39	0.170965	P56391	CX6B1_MOUSE	Cytochrome c oxidase subunit 6B1	Cox6b1	P56391	Mus musculus	substantia nigra development		mitochondrion,mitochondrial inner membrane,mitochondrial intermembrane space	sp	1	2	uniprot_mouse_proteome	>sp|P56391|CX6B1_MOUSE Cytochrome c oxidase subunit 6B1 OS=Mus musculus GN=Cox6b1 PE=1 SV=2	6	8
TRUE	Old_Decellularized / Young_Decellularized	Old_Decellularized	Young_Decellularized	325	Q99N16	33487316	53992036	0.689132	0.689132	61.2313	1.61231	0	8.68977e-09	5.73685e-08	324	0.197001	Q99N16	CP4F3_MOUSE	Leukotriene-B(4) omega-hydroxylase 2	Cyp4f3	Q99N16	Mus musculus	very long-chain fatty acid metabolic process,long-chain fatty acid metabolic process,regulation of blood pressure,drug metabolic process,arachidonic acid metabolic process,epoxygenase P450 pathway,negative regulation of icosanoid secretion,positive regulation of icosanoid secretion,leukotriene B4 catabolic process,vitamin E metabolic process,menaquinone catabolic process,phylloquinone catabolic p…	iron ion binding,arachidonic acid epoxygenase activity,oxidoreductase activity, acting on paired donors, with incorporation or reduction of molecular oxygen, NAD(P)H as one donor, and incorporation of one atom of oxygen,alkane 1-monooxygenase activity,heme binding,leukotriene-B4 20-monooxygenase activity,arachidonic acid omega-hydroxylase activity,alpha-tocopherol omega-hydroxylase activity,tocot…	cytoplasm,endoplasmic reticulum membrane,integral component of membrane,apical plasma membrane,organelle membrane,intracellular membrane-bounded organelle	sp	1	2	uniprot_mouse_proteome	>sp|Q99N16|CP4F3_MOUSE Leukotriene-B(4) omega-hydroxylase 2 OS=Mus musculus GN=Cyp4f3 PE=1 SV=2	29	65
TRUE	Old_Decellularized / Young_Decellularized	Old_Decellularized	Young_Decellularized	210	P20239;Q3UX44	53571096	30962202	-0.790947	0.790947	-42.2035	0.577965	0	9.27736e-09	6.04087e-08	209	0.153308	P20239;Q3UX44	ZP2_MOUSE;Q3UX44_MOUSE	Zona pellucida sperm-binding protein 2	Zp2	P20239;Q3UX44	Mus musculus	binding of sperm to zona pellucida,prevention of polyspermy,manganese ion transport;	protein binding,acrosin binding,identical protein binding;	proteinaceous extracellular matrix,multivesicular body,endoplasmic reticulum,plasma membrane,integral component of membrane,extracellular matrix,Golgi apparatus,secretory granule;	sp;tr	1	1	uniprot_mouse_proteome	>sp|P20239|ZP2_MOUSE Zona pellucida sperm-binding protein 2 OS=Mus musculus GN=Zp2 PE=1 SV=1;>tr|Q3UX44|Q3UX44_MOUSE Zona pellucida sperm-binding protein 2 OS=Mus musculus GN=Zp2 PE=1 SV=1	24	42
TRUE	Old_Decellularized / Young_Decellularized	Old_Decellularized	Young_Decellularized	35	E9PZ00;J3QPG5;K3W4L3;Q61207;Q8BFQ1	538214	1.32044e+06	1.29477	1.29477	145.337	2.45337	0	2.11433e-08	1.32821e-07	34	0.223239	E9PZ00;J3QPG5;K3W4L3;Q61207;Q8BFQ1	E9PZ00_MOUSE;J3QPG5_MOUSE;K3W4L3_MOUSE;SAP_MOUSE;Q8BFQ1_MOUSE	Prosaposin	Psap	E9PZ00;J3QPG5;K3W4L3;Q61207;Q8BFQ1	Mus musculus	;;;sphingolipid metabolic process,adenylate cyclase-inhibiting G-protein coupled receptor signaling pathway,regulation of lipid metabolic process,positive regulation of catalytic activity,regulation of MAPK cascade,positive regulation of MAPK cascade,developmental growth,prostate gland growth,epithelial cell differentiation involved in prostate gland development,cellular response to organic subst…	;;;G-protein coupled receptor binding,beta-galactosidase activity,phospholipid binding,enzyme activator activity,protein homodimerization activity,Requires Ontology;	;;;extracellular space,mitochondrion,lysosome,extracellular matrix,intracellular membrane-bounded organelle,extracellular exosome;	tr;tr;tr;sp;tr	1	1;1;1;2;1	uniprot_mouse_proteome	>tr|E9PZ00|E9PZ00_MOUSE Prosaposin OS=Mus musculus GN=Psap PE=1 SV=1;>tr|J3QPG5|J3QPG5_MOUSE Prosaposin OS=Mus musculus GN=Psap PE=1 SV=1;>tr|K3W4L3|K3W4L3_MOUSE Prosaposin OS=Mus musculus GN=Psap PE=1 SV=1;>sp|Q61207|SAP_MOUSE Prosaposin OS=Mus musculus GN=Psap PE=1 SV=2;>tr|Q8BFQ1|Q8BFQ1_MOUSE Prosaposin OS=Mus musculus GN=Psap PE=1 SV=1	6	7
TRUE	Old_Decellularized / Young_Decellularized	Old_Decellularized	Young_Decellularized	100	A0A0G2JGX4;Q6PIC6;Q8VCE0	885206	1.3594e+06	0.618886	0.618886	53.5689	1.53569	0	2.40615e-08	1.5049e-07	99	0.160329	A0A0G2JGX4;Q6PIC6;Q8VCE0	A0A0G2JGX4_MOUSE;AT1A3_MOUSE;Q8VCE0_MOUSE	Sodium/potassium-transporting ATPase subunit alpha;Sodium/potassium-transporting ATPase subunit alpha-3;Sodium/potassium-transporting ATPase subunit alpha	Atp1a3	A0A0G2JGX4;Q6PIC6;Q8VCE0	Mus musculus	;cellular sodium ion homeostasis,memory,adult locomotory behavior,visual learning,potassium ion import,establishment or maintenance of transmembrane electrochemical gradient,cerebral cortex development,cellular potassium ion homeostasis,ionotropic glutamate receptor signaling pathway,sodium ion export from cell,response to drug,cardiac muscle contraction,cellular response to retinoic acid,regulat…	;beta-amyloid binding,sodium:potassium-exchanging ATPase activity,ATP binding,D1 dopamine receptor binding,heparan sulfate proteoglycan binding,metal ion binding,chaperone binding,sodium:potassium-exchanging ATPase activity involved in regulation of cardiac muscle cell membrane potential;	;nucleus,cytoplasm,endoplasmic reticulum,Golgi apparatus,plasma membrane,sodium:potassium-exchanging ATPase complex,axon,sarcolemma,neuronal cell body,myelin sheath,dendritic spine neck,dendritic spine head,synapse,extracellular vesicle;	tr;sp;tr	1	1	uniprot_mouse_proteome	>tr|A0A0G2JGX4|A0A0G2JGX4_MOUSE Sodium/potassium-transporting ATPase subunit alpha OS=Mus musculus GN=Atp1a3 PE=1 SV=1;>sp|Q6PIC6|AT1A3_MOUSE Sodium/potassium-transporting ATPase subunit alpha-3 OS=Mus musculus GN=Atp1a3 PE=1 SV=1;>tr|Q8VCE0|Q8VCE0_MOUSE Sodium/potassium-transporting ATPase subunit alpha OS=Mus musculus GN=Atp1a3 PE=1 SV=1	17	20
TRUE	Old_Decellularized / Young_Decellularized	Old_Decellularized	Young_Decellularized	45	A0A0M3HEP7;P70704-2	227605	365675	0.684034	0.684034	60.6626	1.60663	0	2.44692e-08	1.5164e-07	44	0.130935	A0A0M3HEP7;P70704-2	A0A0M3HEP7_MOUSE;AT8A1_MOUSE	Phospholipid-transporting ATPase;Isoform 2 of Phospholipid-transporting ATPase IA	Atp8a1	A0A0M3HEP7;P70704-2	Mus musculus	;	;	;	tr;sp	1;	1;	uniprot_mouse_proteome	>tr|A0A0M3HEP7|A0A0M3HEP7_MOUSE Phospholipid-transporting ATPase OS=Mus musculus GN=Atp8a1 PE=1 SV=1;>sp|P70704-2|AT8A1_MOUSE Isoform 2 of Phospholipid-transporting ATPase IA OS=Mus musculus GN=Atp8a1	9	9
TRUE	Old_Decellularized / Young_Decellularized	Old_Decellularized	Young_Decellularized	35	Q8BVA0;Q99P91	192796	1.06703e+06	2.46846	2.46846	453.451	5.53451	0	2.71284e-08	1.6603e-07	34	0.423678	Q8BVA0;Q99P91	Q8BVA0_MOUSE;GPNMB_MOUSE	Transmembrane glycoprotein NMB	Gpnmb	Q8BVA0;Q99P91	Mus musculus	;osteoblast differentiation,negative regulation of cytokine production,positive regulation of protein phosphorylation,cell adhesion,signal transduction,cell-cell signaling,regulation of receptor activity,bone mineralization,positive regulation of cell migration,positive regulation of protein autophosphorylation,negative regulation of tumor necrosis factor production,regulation of tissue remodelin…	;integrin binding,heparin binding,syndecan binding,receptor agonist activity	;integral component of plasma membrane,endomembrane system,integral component of membrane,cytoplasmic vesicle membrane,cytoplasmic vesicle,melanosome	tr;sp	1	1;2	uniprot_mouse_proteome	>tr|Q8BVA0|Q8BVA0_MOUSE Transmembrane glycoprotein NMB OS=Mus musculus GN=Gpnmb PE=1 SV=1;>sp|Q99P91|GPNMB_MOUSE Transmembrane glycoprotein NMB OS=Mus musculus GN=Gpnmb PE=1 SV=2	3	7
TRUE	Old_Decellularized / Young_Decellularized	Old_Decellularized	Young_Decellularized	100	P28654	5172804	8.30708e+06	0.683395	0.683395	60.5915	1.60591	0	4.66513e-08	2.72642e-07	99	0.265193	P28654	PGS2_MOUSE	Decorin	Dcn	P28654	Mus musculus	kidney development,placenta development,negative regulation of protein kinase activity,skeletal muscle tissue development,aging,response to mechanical stimulus,positive regulation of autophagy,negative regulation of endothelial cell migration,positive regulation of phosphatidylinositol 3-kinase signaling,positive regulation of macroautophagy,negative regulation of angiogenesis,cytokine-mediated s…	RNA binding,protein kinase inhibitor activity,collagen binding,glycosaminoglycan binding,protein N-terminus binding,extracellular matrix binding	proteinaceous extracellular matrix,collagen type VI trimer,extracellular space,cytoplasm,extracellular matrix	sp	1	1	uniprot_mouse_proteome	>sp|P28654|PGS2_MOUSE Decorin OS=Mus musculus GN=Dcn PE=1 SV=1	13	20
TRUE	Old_Decellularized / Young_Decellularized	Old_Decellularized	Young_Decellularized	35	A0A0R4J039;Q9ESB3	276083	539063	0.965352	0.965352	95.2541	1.95254	0	7.53845e-08	4.24894e-07	34	0.19548	A0A0R4J039;Q9ESB3	A0A0R4J039_MOUSE;HRG_MOUSE	Histidine-rich glycoprotein	Hrg	A0A0R4J039;Q9ESB3	Mus musculus	;angiogenesis,positive regulation of immune response to tumor cell,chemotaxis,negative regulation of cell adhesion,negative regulation of cell proliferation,regulation of gene expression,regulation of platelet activation,negative regulation of lamellipodium assembly,negative regulation of endopeptidase activity,response to organic cyclic compound,heme transport,negative regulation of angiogenesis…	;serine-type endopeptidase inhibitor activity,cysteine-type endopeptidase inhibitor activity,receptor binding,protein binding,heparin binding,zinc ion binding,immunoglobulin binding,heme binding,heparan sulfate proteoglycan binding,metal ion binding	;vesicle,endolysosome,phagolysosome membrane,blood microparticle	tr;sp	1	1;2	uniprot_mouse_proteome	>tr|A0A0R4J039|A0A0R4J039_MOUSE Histidine-rich glycoprotein OS=Mus musculus GN=Hrg PE=1 SV=1;>sp|Q9ESB3|HRG_MOUSE Histidine-rich glycoprotein OS=Mus musculus GN=Hrg PE=1 SV=2	7	7
TRUE	Old_Decellularized / Young_Decellularized	Old_Decellularized	Young_Decellularized	35	Q8C2W8	320081	76449.1	-2.06586	2.06586	-76.1157	0.238843	0	7.71832e-08	4.28682e-07	34	0.302125	Q8C2W8	Q8C2W8_MOUSE	Protein Fbxw19	Fbxw19	Q8C2W8	Mus musculus	biological_process	molecular_function	cellular_component	tr	2	1	uniprot_mouse_proteome	>tr|Q8C2W8|Q8C2W8_MOUSE Protein Fbxw19 OS=Mus musculus GN=Fbxw19 PE=2 SV=1	7	7
TRUE	Old_Decellularized / Young_Decellularized	Old_Decellularized	Young_Decellularized	40	Q3UMU9;Q3UMU9-2;Q3UMU9-3;Q3UMU9-4	316852	518115	0.709461	0.709461	63.5193	1.63519	0	7.72589e-08	4.28682e-07	39	0.13076	Q3UMU9;Q3UMU9-2;Q3UMU9-3;Q3UMU9-4	HDGR2_MOUSE	Hepatoma-derived growth factor-related protein 2;Isoform 2 of Hepatoma-derived growth factor-related protein 2;Isoform 3 of Hepatoma-derived growth factor-related protein 2;Isoform 4 of Hepatoma-derived growth factor-related protein 2	Hdgfrp2	Q3UMU9;Q3UMU9-2;Q3UMU9-3;Q3UMU9-4	Mus musculus	positive regulation of cell growth;;;	chromatin binding,protein binding;;;	nucleus;;;	sp	1;;;	1;;;	uniprot_mouse_proteome	>sp|Q3UMU9|HDGR2_MOUSE Hepatoma-derived growth factor-related protein 2 OS=Mus musculus GN=Hdgfrp2 PE=1 SV=1;>sp|Q3UMU9-2|HDGR2_MOUSE Isoform 2 of Hepatoma-derived growth factor-related protein 2 OS=Mus musculus GN=Hdgfrp2;>sp|Q3UMU9-3|HDGR2_MOUSE Isoform 3 of Hepatoma-derived growth factor-related protein 2 OS=Mus musculus GN=Hdgfrp2;>sp|Q3UMU9-4|HDGR2_MOUSE Isoform 4 of Hepatoma-derived growth …	8	8
TRUE	Old_Decellularized / Young_Decellularized	Old_Decellularized	Young_Decellularized	70	P97311;Q3ULG5	1.25987e+06	809787	-0.637656	0.637656	-35.7244	0.642756	0	8.45363e-08	4.66044e-07	69	0.164803	P97311;Q3ULG5	MCM6_MOUSE;Q3ULG5_MOUSE	DNA replication licensing factor MCM6;DNA helicase	Mcm6	P97311;Q3ULG5	Mus musculus	DNA unwinding involved in DNA replication,DNA replication initiation,cell cycle;	single-stranded DNA binding,protein binding,ATP binding,identical protein binding,DNA helicase activity,ATP-dependent DNA helicase activity;	nuclear chromosome, telomeric region,nucleus,nucleoplasm,MCM complex;	sp;tr	1	1	uniprot_mouse_proteome	>sp|P97311|MCM6_MOUSE DNA replication licensing factor MCM6 OS=Mus musculus GN=Mcm6 PE=1 SV=1;>tr|Q3ULG5|Q3ULG5_MOUSE DNA helicase OS=Mus musculus GN=Mcm6 PE=1 SV=1	14	14
TRUE	Old_Decellularized / Young_Decellularized	Old_Decellularized	Young_Decellularized	40	A0A0G2JGD2;P07091	2637642	1.65051e+06	-0.676334	0.676334	-37.4247	0.625753	0	8.80261e-08	4.82789e-07	39	0.0979434	A0A0G2JGD2;P07091	A0A0G2JGD2_MOUSE;S10A4_MOUSE	Protein S100-A4 (Fragment);Protein S100-A4	S100a4	A0A0G2JGD2;P07091	Mus musculus	;positive regulation of I-kappaB kinase/NF-kappaB signaling	;RNA binding,actin binding,calcium ion binding,protein binding,identical protein binding,transition metal ion binding,calcium-dependent protein binding,RAGE receptor binding	;extracellular space,nucleus,neuron projection,perinuclear region of cytoplasm,extracellular exosome	tr;sp	1	1	uniprot_mouse_proteome	>tr|A0A0G2JGD2|A0A0G2JGD2_MOUSE Protein S100-A4 (Fragment) OS=Mus musculus GN=S100a4 PE=1 SV=1;>sp|P07091|S10A4_MOUSE Protein S100-A4 OS=Mus musculus GN=S100a4 PE=1 SV=1	5	8
TRUE	Old_Decellularized / Young_Decellularized	Old_Decellularized	Young_Decellularized	55	Q9CRB9	1384120	2.34477e+06	0.760478	0.760478	69.4052	1.69405	0	1.37339e-07	7.41836e-07	54	0.240452	Q9CRB9	MIC19_MOUSE	MICOS complex subunit Mic19	Chchd3	Q9CRB9	Mus musculus	negative regulation of transcription from RNA polymerase II promoter,transcription, DNA-templated,inner mitochondrial membrane organization,mitochondrial fusion,cristae formation	transcriptional repressor activity, RNA polymerase II transcription regulatory region sequence-specific binding,protein binding,phosphatase binding,protein complex scaffold	nucleus,cytoplasm,mitochondrion,mitochondrial inner membrane,MICOS complex,extracellular exosome	sp	1	1	uniprot_mouse_proteome	>sp|Q9CRB9|MIC19_MOUSE MICOS complex subunit Mic19 OS=Mus musculus GN=Chchd3 PE=1 SV=1	10	11
TRUE	Old_Decellularized / Young_Decellularized	Old_Decellularized	Young_Decellularized	85	G3X9L6;Q9DCX2	2787732	4.54664e+06	0.705709	0.705709	63.0946	1.63095	0	1.67154e-07	8.9274e-07	84	0.14366	G3X9L6;Q9DCX2	G3X9L6_MOUSE;ATP5H_MOUSE	MCG55033;ATP synthase subunit d, mitochondrial	Gm10250;Atp5h	G3X9L6;Q9DCX2	Mus musculus	ATP synthesis coupled proton transport,Requires Ontology;ATP synthesis coupled proton transport,Requires Ontology	proton-transporting ATP synthase activity, rotational mechanism;ATPase activity,proton-transporting ATP synthase activity, rotational mechanism	mitochondrial proton-transporting ATP synthase, stator stalk;mitochondrial proton-transporting ATP synthase, stator stalk,nucleoplasm,mitochondrion,mitochondrial inner membrane,mitochondrial proton-transporting ATP synthase complex,cytosol,myelin sheath,extracellular exosome	tr;sp	4;1	1;3	uniprot_mouse_proteome	>tr|G3X9L6|G3X9L6_MOUSE MCG55033 OS=Mus musculus GN=Gm10250 PE=4 SV=1;>sp|Q9DCX2|ATP5H_MOUSE ATP synthase subunit d, mitochondrial OS=Mus musculus GN=Atp5h PE=1 SV=3	11	17
TRUE	Old_Decellularized / Young_Decellularized	Old_Decellularized	Young_Decellularized	50	Q8K297	712599	462939	-0.622268	0.622268	-35.0351	0.649649	0	1.67996e-07	8.93887e-07	49	0.121257	Q8K297	GT251_MOUSE	Procollagen galactosyltransferase 1	Colgalt1	Q8K297	Mus musculus	positive regulation of collagen fibril organization	procollagen galactosyltransferase activity	endoplasmic reticulum lumen,membrane	sp	1	2	uniprot_mouse_proteome	>sp|Q8K297|GT251_MOUSE Procollagen galactosyltransferase 1 OS=Mus musculus GN=Colgalt1 PE=1 SV=2	10	10
TRUE	Old_Decellularized / Young_Decellularized	Old_Decellularized	Young_Decellularized	60	Q60605;Q60605-2	1.93691e+06	2.96176e+06	0.612696	0.612696	52.9114	1.52911	0	1.9236e-07	1.0122e-06	59	0.145608	Q60605;Q60605-2	MYL6_MOUSE	Myosin light polypeptide 6;Isoform Smooth muscle of Myosin light polypeptide 6	Myl6	Q60605;Q60605-2	Mus musculus	muscle contraction,skeletal muscle tissue development,muscle filament sliding;	motor activity,calcium ion binding,protein binding,structural constituent of muscle,actin-dependent ATPase activity;	brush border,membrane,myosin complex,unconventional myosin complex,extracellular matrix,vesicle,extracellular exosome;	sp	1;	3;	uniprot_mouse_proteome	>sp|Q60605|MYL6_MOUSE Myosin light polypeptide 6 OS=Mus musculus GN=Myl6 PE=1 SV=3;>sp|Q60605-2|MYL6_MOUSE Isoform Smooth muscle of Myosin light polypeptide 6 OS=Mus musculus GN=Myl6	8	12
TRUE	Old_Decellularized / Young_Decellularized	Old_Decellularized	Young_Decellularized	40	E9QN31	537571	319805	-0.749262	0.749262	-40.5092	0.594908	0	1.99503e-07	1.04592e-06	39	0.126083	E9QN31	E9QN31_MOUSE	Probable 28S rRNA (cytosine-C(5))-methyltransferase	Nop2	E9QN31	Mus musculus				tr	1	1	uniprot_mouse_proteome	>tr|E9QN31|E9QN31_MOUSE Probable 28S rRNA (cytosine-C(5))-methyltransferase OS=Mus musculus GN=Nop2 PE=1 SV=1	7	8
TRUE	Old_Decellularized / Young_Decellularized	Old_Decellularized	Young_Decellularized	45	Q08879-2	795084	434894	-0.870443	0.870443	-45.3021	0.546979	0	2.10253e-07	1.09424e-06	44	0.106736	Q08879-2	FBLN1_MOUSE	Isoform C of Fibulin-1	Fbln1	Q08879-2	Mus musculus				sp			uniprot_mouse_proteome	>sp|Q08879-2|FBLN1_MOUSE Isoform C of Fibulin-1 OS=Mus musculus GN=Fbln1	9	9
TRUE	Old_Decellularized / Young_Decellularized	Old_Decellularized	Young_Decellularized	65	Q810A7;Q810A7-2	809284	521739	-0.633317	0.633317	-35.5308	0.644692	0	2.13682e-07	1.10804e-06	64	0.0840216	Q810A7;Q810A7-2	DDX42_MOUSE	ATP-dependent RNA helicase DDX42;Isoform 2 of ATP-dependent RNA helicase DDX42	Ddx42	Q810A7;Q810A7-2	Mus musculus	protein localization,RNA secondary structure unwinding,regulation of apoptotic process;	RNA binding,ATP-dependent RNA helicase activity,ATP binding;	nucleus,nucleolus,cytoplasm,cytosol,Cajal body,membrane,nuclear speck;	sp	1;	3;	uniprot_mouse_proteome	>sp|Q810A7|DDX42_MOUSE ATP-dependent RNA helicase DDX42 OS=Mus musculus GN=Ddx42 PE=1 SV=3;>sp|Q810A7-2|DDX42_MOUSE Isoform 2 of ATP-dependent RNA helicase DDX42 OS=Mus musculus GN=Ddx42	13	13
TRUE	Old_Decellularized / Young_Decellularized	Old_Decellularized	Young_Decellularized	25	P51661	402509	201815	-0.995985	0.995985	-49.8607	0.501393	0	2.37685e-07	1.22361e-06	24	0.122038	P51661	DHI2_MOUSE	Corticosteroid 11-beta-dehydrogenase isozyme 2	Hsd11b2	P51661	Mus musculus	response to hypoxia,regulation of blood volume by renal aldosterone,female pregnancy,glucocorticoid metabolic process,response to food,response to insulin,response to drug,response to glucocorticoid,oxidation-reduction process	11-beta-hydroxysteroid dehydrogenase [NAD(P)] activity,steroid binding,NAD binding	endoplasmic reticulum	sp	1	2	uniprot_mouse_proteome	>sp|P51661|DHI2_MOUSE Corticosteroid 11-beta-dehydrogenase isozyme 2 OS=Mus musculus GN=Hsd11b2 PE=1 SV=2	5	5
TRUE	Old_Decellularized / Young_Decellularized	Old_Decellularized	Young_Decellularized	95	Q6ZWN5	21031274	13909511	-0.596465	0.596465	-33.8627	0.661373	0	2.38989e-07	1.22589e-06	94	0.0660771	Q6ZWN5	RS9_MOUSE	40S ribosomal protein S9	Rps9	Q6ZWN5	Mus musculus	translation,positive regulation of cell proliferation,positive regulation of translational fidelity	RNA binding,structural constituent of ribosome,rRNA binding,translation regulator activity	nucleus,nucleolus,cytoplasm,focal adhesion,membrane,cytosolic small ribosomal subunit,intracellular ribonucleoprotein complex,extracellular exosome	sp	1	3	uniprot_mouse_proteome	>sp|Q6ZWN5|RS9_MOUSE 40S ribosomal protein S9 OS=Mus musculus GN=Rps9 PE=1 SV=3	14	19
TRUE	Old_Decellularized / Young_Decellularized	Old_Decellularized	Young_Decellularized	95	Q61553	2.46527e+06	1343407	-0.87585	0.87585	-45.5067	0.544933	0	2.45436e-07	1.24997e-06	94	0.125043	Q61553	FSCN1_MOUSE	Fascin	Fscn1	Q61553	Mus musculus	cell-cell junction assembly,establishment or maintenance of cell polarity,anatomical structure morphogenesis,positive regulation of lamellipodium assembly,cell migration,microspike assembly,actin cytoskeleton organization,regulation of microvillus assembly,regulation of actin cytoskeleton organization,establishment of apical/basal cell polarity,cell motility,actin filament bundle assembly,positiv…	RNA binding,actin binding,protein binding,drug binding,protein binding, bridging,cadherin binding,actin filament binding	stress fiber,ruffle,podosome,cytoplasm,cytosol,cytoskeleton,microvillus,cell-cell junction,actin cytoskeleton,lamellipodium,filopodium,growth cone,cell projection membrane,filamentous actin,myelin sheath,microspike,extracellular exosome,invadopodium	sp	1	4	uniprot_mouse_proteome	>sp|Q61553|FSCN1_MOUSE Fascin OS=Mus musculus GN=Fscn1 PE=1 SV=4	16	19
TRUE	Old_Decellularized / Young_Decellularized	Old_Decellularized	Young_Decellularized	35	Q3V3R1	333351	187687	-0.828713	0.828713	-43.6969	0.563031	0	2.7648e-07	1.39315e-06	34	0.130573	Q3V3R1	C1TM_MOUSE	Monofunctional C1-tetrahydrofolate synthase, mitochondrial	Mthfd1l	Q3V3R1	Mus musculus	neural tube closure,folic acid-containing compound metabolic process,purine nucleobase biosynthetic process,10-formyltetrahydrofolate biosynthetic process,formate metabolic process,tetrahydrofolate interconversion,tetrahydrofolate metabolic process,embryonic neurocranium morphogenesis,embryonic viscerocranium morphogenesis,oxidation-reduction process	formate-tetrahydrofolate ligase activity,methenyltetrahydrofolate cyclohydrolase activity,methylenetetrahydrofolate dehydrogenase (NADP+) activity,ATP binding,protein homodimerization activity	mitochondrion,membrane	sp	1	2	uniprot_mouse_proteome	>sp|Q3V3R1|C1TM_MOUSE Monofunctional C1-tetrahydrofolate synthase, mitochondrial OS=Mus musculus GN=Mthfd1l PE=1 SV=2	7	7
TRUE	Old_Decellularized / Young_Decellularized	Old_Decellularized	Young_Decellularized	65	Q5SWT3	1.84073e+06	1.08731e+06	-0.759512	0.759512	-40.9304	0.590696	0	3.55136e-07	1.72841e-06	64	0.0876647	Q5SWT3	S2535_MOUSE	Solute carrier family 25 member 35	Slc25a35	Q5SWT3	Mus musculus	mitochondrial transport,transmembrane transport	transmembrane transporter activity	mitochondrion,mitochondrial inner membrane,integral component of membrane	sp	1	2	uniprot_mouse_proteome	>sp|Q5SWT3|S2535_MOUSE Solute carrier family 25 member 35 OS=Mus musculus GN=Slc25a35 PE=1 SV=2	11	13
TRUE	Old_Decellularized / Young_Decellularized	Old_Decellularized	Young_Decellularized	20	Q9R0P9	315835	100942	-1.64564	1.64564	-68.0396	0.319604	0	4.13483e-07	1.97862e-06	19	0.227569	Q9R0P9	UCHL1_MOUSE	Ubiquitin carboxyl-terminal hydrolase isozyme L1	Uchl1	Q9R0P9	Mus musculus	response to ischemia,ubiquitin-dependent protein catabolic process,axonogenesis,axon target recognition,adult walking behavior,cell proliferation,protein deubiquitination,sensory perception of pain,axonal transport of mitochondrion,eating behavior,negative regulation of MAP kinase activity,muscle fiber development,neuromuscular process	cysteine-type endopeptidase activity,thiol-dependent ubiquitin-specific protease activity,omega peptidase activity,ligase activity,ubiquitin protein ligase binding,alpha-2A adrenergic receptor binding,ubiquitin binding	nucleoplasm,cytoplasm,endoplasmic reticulum membrane,cytosol,axon,neuronal cell body,myelin sheath,neuron projection terminus,extracellular exosome,axon cytoplasm,plasma membrane	sp	1	1	uniprot_mouse_proteome	>sp|Q9R0P9|UCHL1_MOUSE Ubiquitin carboxyl-terminal hydrolase isozyme L1 OS=Mus musculus GN=Uchl1 PE=1 SV=1	4	4
TRUE	Old_Decellularized / Young_Decellularized	Old_Decellularized	Young_Decellularized	135	P12970	18162554	11848722	-0.616236	0.616236	-34.7629	0.652371	0	5.02521e-07	2.34949e-06	134	0.0630236	P12970	RL7A_MOUSE	60S ribosomal protein L7a	Rpl7a	P12970	Mus musculus	maturation of LSU-rRNA,translation	RNA binding,protein binding,cadherin binding	nucleus,nucleolus,cytoplasm,focal adhesion,membrane,cytosolic large ribosomal subunit,polysomal ribosome,extracellular exosome	sp	1	2	uniprot_mouse_proteome	>sp|P12970|RL7A_MOUSE 60S ribosomal protein L7a OS=Mus musculus GN=Rpl7a PE=1 SV=2	17	27
TRUE	Old_Decellularized / Young_Decellularized	Old_Decellularized	Young_Decellularized	55	D3YYU8	308939	173845	-0.829522	0.829522	-43.7284	0.562716	0	5.22266e-07	2.4259e-06	54	0.134874	D3YYU8	OBSL1_MOUSE	Obscurin-like protein 1	Obsl1	D3YYU8	Mus musculus	microtubule cytoskeleton organization,striated muscle contraction,actin filament organization,Golgi organization,regulation of mitotic nuclear division,protein localization to Golgi apparatus,sarcomere organization,positive regulation of dendrite morphogenesis,striated muscle myosin thick filament assembly	structural constituent of muscle,actin filament binding,muscle alpha-actinin binding,structural molecule activity conferring elasticity	cytoplasm,Golgi apparatus,centrosome,muscle myosin complex,Z disc,M band,perinuclear region of cytoplasm,3M complex	sp	1	1	uniprot_mouse_proteome	>sp|D3YYU8|OBSL1_MOUSE Obscurin-like protein 1 OS=Mus musculus GN=Obsl1 PE=1 SV=1	11	11
TRUE	Old_Decellularized / Young_Decellularized	Old_Decellularized	Young_Decellularized	30	Q8K3V4	317133	81036.6	-1.96844	1.96844	-74.4471	0.255529	0	5.37667e-07	2.47327e-06	29	0.432593	Q8K3V4	PADI6_MOUSE	Protein-arginine deiminase type-6	Padi6	Q8K3V4	Mus musculus	cytoskeleton organization,cytoplasm organization,protein citrullination,cellular protein localization,histone citrullination,regulation of translation by machinery localization	protein-arginine deiminase activity,calcium ion binding,protein binding	nucleus,cytoplasm,intermediate filament cytoskeleton	sp	1	2	uniprot_mouse_proteome	>sp|Q8K3V4|PADI6_MOUSE Protein-arginine deiminase type-6 OS=Mus musculus GN=Padi6 PE=1 SV=2	6	6
TRUE	Old_Decellularized / Young_Decellularized	Old_Decellularized	Young_Decellularized	185	P27659	18440472	12259865	-0.588932	0.588932	-33.5165	0.664835	0	5.45439e-07	2.50095e-06	184	0.0804918	P27659	RL3_MOUSE	60S ribosomal protein L3	Rpl3	P27659	Mus musculus	ribosomal large subunit assembly,translation,cellular response to interleukin-4	RNA binding,structural constituent of ribosome,5S rRNA binding	nucleus,nucleolus,cytoplasm,cytosol,focal adhesion,cytosolic large ribosomal subunit,protein complex,extracellular exosome	sp	1	3	uniprot_mouse_proteome	>sp|P27659|RL3_MOUSE 60S ribosomal protein L3 OS=Mus musculus GN=Rpl3 PE=1 SV=3	19	37
TRUE	Old_Decellularized / Young_Decellularized	Old_Decellularized	Young_Decellularized	35	O35074;Q8BXC0	339872	190506	-0.835156	0.835156	-43.9478	0.560522	0	7.13061e-07	3.2178e-06	34	0.148151	O35074;Q8BXC0	PTGIS_MOUSE;Q8BXC0_MOUSE	Prostacyclin synthase	Ptgis	O35074;Q8BXC0	Mus musculus	prostaglandin biosynthetic process,embryo implantation,negative regulation of NF-kappaB transcription factor activity,positive regulation of peroxisome proliferator activated receptor signaling pathway,regulation of apoptotic process,negative regulation of nitric oxide biosynthetic process,positive regulation of angiogenesis,decidualization,negative regulation of inflammatory response,oxidation-r…	monooxygenase activity,iron ion binding,prostaglandin-I synthase activity,oxidoreductase activity, acting on paired donors, with incorporation or reduction of molecular oxygen,heme binding;	extracellular space,nucleus,cytoplasm,endoplasmic reticulum,endoplasmic reticulum membrane,caveola,integral component of membrane;	sp;tr	1	1	uniprot_mouse_proteome	>sp|O35074|PTGIS_MOUSE Prostacyclin synthase OS=Mus musculus GN=Ptgis PE=1 SV=1;>tr|Q8BXC0|Q8BXC0_MOUSE Prostacyclin synthase OS=Mus musculus GN=Ptgis PE=1 SV=1	7	7
TRUE	Old_Decellularized / Young_Decellularized	Old_Decellularized	Young_Decellularized	35	Q99LJ6	742451	439790	-0.755481	0.755481	-40.7651	0.592349	0	7.27579e-07	3.27296e-06	34	0.115263	Q99LJ6	GPX7_MOUSE	Glutathione peroxidase 7	Gpx7	Q99LJ6	Mus musculus	response to oxidative stress,oxidation-reduction process,cellular oxidant detoxification	catalase activity,peroxidase activity,glutathione peroxidase activity	extracellular region,endoplasmic reticulum	sp	1	1	uniprot_mouse_proteome	>sp|Q99LJ6|GPX7_MOUSE Glutathione peroxidase 7 OS=Mus musculus GN=Gpx7 PE=1 SV=1	6	7
TRUE	Old_Decellularized / Young_Decellularized	Old_Decellularized	Young_Decellularized	35	Q06185	7.05839e+06	11870777	0.750004	0.750004	68.1797	1.6818	0	8.08303e-07	3.57963e-06	34	0.13764	Q06185	ATP5I_MOUSE	ATP synthase subunit e, mitochondrial	Atp5i	Q06185	Mus musculus	ATP synthesis coupled proton transport	hydrogen ion transmembrane transporter activity,ATPase activity	mitochondrial proton-transporting ATP synthase complex, coupling factor F(o),mitochondrion,mitochondrial proton-transporting ATP synthase complex	sp	1	2	uniprot_mouse_proteome	>sp|Q06185|ATP5I_MOUSE ATP synthase subunit e, mitochondrial OS=Mus musculus GN=Atp5i PE=1 SV=2	4	7
TRUE	Old_Decellularized / Young_Decellularized	Old_Decellularized	Young_Decellularized	125	P10761	111493712	73310592	-0.604869	0.604869	-34.2469	0.657531	0	8.51073e-07	3.73425e-06	124	0.140568	P10761	ZP3_MOUSE	Zona pellucida sperm-binding protein 3	Zp3	P10761	Mus musculus	positive regulation of type IV hypersensitivity,blastocyst formation,humoral immune response mediated by circulating immunoglobulin,positive regulation of leukocyte migration,positive regulation of humoral immune response,manganese ion transport,binding of sperm to zona pellucida,regulation of receptor activity,positive regulation of phosphatidylinositol biosynthetic process,positive regulation o…	signal transducer activity,manganese ion transmembrane transporter activity,protein binding,carbohydrate binding,acrosin binding,structural constituent of egg coat,identical protein binding,receptor agonist activity	proteinaceous extracellular matrix,extracellular space,cytoplasm,multivesicular body,endoplasmic reticulum,plasma membrane,integral component of membrane,extracellular matrix,outer acrosomal membrane,Golgi apparatus,secretory granule,perinuclear region of cytoplasm	sp	1	4	uniprot_mouse_proteome	>sp|P10761|ZP3_MOUSE Zona pellucida sperm-binding protein 3 OS=Mus musculus GN=Zp3 PE=1 SV=4	14	25
TRUE	Old_Decellularized / Young_Decellularized	Old_Decellularized	Young_Decellularized	35	Q3TIX9	391233	230993	-0.760179	0.760179	-40.9577	0.590423	0	1.09082e-06	4.70848e-06	34	0.160732	Q3TIX9	SNUT2_MOUSE	U4/U6.U5 tri-snRNP-associated protein 2	Usp39	Q3TIX9	Mus musculus	spliceosomal complex assembly,cell cycle,protein deubiquitination,cell division	zinc ion binding,thiol-dependent ubiquitinyl hydrolase activity	nucleoplasm,spliceosomal complex	sp	1	2	uniprot_mouse_proteome	>sp|Q3TIX9|SNUT2_MOUSE U4/U6.U5 tri-snRNP-associated protein 2 OS=Mus musculus GN=Usp39 PE=1 SV=2	6	7
TRUE	Old_Decellularized / Young_Decellularized	Old_Decellularized	Young_Decellularized	25	A1L314;E9QN37	264969	439399	0.729711	0.729711	65.8307	1.65831	0	1.09292e-06	4.70848e-06	24	0.156295	A1L314;E9QN37	MPEG1_MOUSE;E9QN37_MOUSE	Macrophage-expressed gene 1 protein	Mpeg1	A1L314;E9QN37	Mus musculus	;	;	integral component of membrane;	sp;tr	1	1	uniprot_mouse_proteome	>sp|A1L314|MPEG1_MOUSE Macrophage-expressed gene 1 protein OS=Mus musculus GN=Mpeg1 PE=1 SV=1;>tr|E9QN37|E9QN37_MOUSE Macrophage-expressed gene 1 protein OS=Mus musculus GN=Mpeg1 PE=1 SV=1	5	5
TRUE	Old_Decellularized / Young_Decellularized	Old_Decellularized	Young_Decellularized	40	A0A0N4SUV6;Q9JHW4	412464	266281	-0.631319	0.631319	-35.4414	0.645586	0	1.31648e-06	5.48919e-06	39	0.127952	A0A0N4SUV6;Q9JHW4	A0A0N4SUV6_MOUSE;SELB_MOUSE	Selenocysteine-specific elongation factor	Eefsec	A0A0N4SUV6;Q9JHW4	Mus musculus	;selenocysteine incorporation,selenocysteine metabolic process	;tRNA binding,translation elongation factor activity,GTPase activity,protein binding,GTP binding,selenocysteine insertion sequence binding,ribonucleoprotein complex binding	;nucleus,mitochondrion,cytosol,intracellular ribonucleoprotein complex	tr;sp	1	1;2	uniprot_mouse_proteome	>tr|A0A0N4SUV6|A0A0N4SUV6_MOUSE Selenocysteine-specific elongation factor OS=Mus musculus GN=Eefsec PE=1 SV=1;>sp|Q9JHW4|SELB_MOUSE Selenocysteine-specific elongation factor OS=Mus musculus GN=Eefsec PE=1 SV=2	8	8
TRUE	Old_Decellularized / Young_Decellularized	Old_Decellularized	Young_Decellularized	25	A0A0R4J0U5;Q61285	298943	154821	-0.949266	0.949266	-48.2104	0.517896	0	1.36936e-06	5.69301e-06	24	0.157765	A0A0R4J0U5;Q61285	A0A0R4J0U5_MOUSE;ABCD2_MOUSE	ATP-binding cassette sub-family D member 2	Abcd2	A0A0R4J0U5;Q61285	Mus musculus	;very long-chain fatty acid metabolic process,fatty acid beta-oxidation,positive regulation of fatty acid beta-oxidation,very long-chain fatty acid catabolic process,transmembrane transport	;ATP binding,ATPase activity, coupled to transmembrane movement of substances,protein homodimerization activity	;mitochondrion,peroxisome,peroxisomal membrane,integral component of membrane	tr;sp	1	1	uniprot_mouse_proteome	>tr|A0A0R4J0U5|A0A0R4J0U5_MOUSE ATP-binding cassette sub-family D member 2 OS=Mus musculus GN=Abcd2 PE=1 SV=1;>sp|Q61285|ABCD2_MOUSE ATP-binding cassette sub-family D member 2 OS=Mus musculus GN=Abcd2 PE=1 SV=1	5	5
TRUE	Old_Decellularized / Young_Decellularized	Old_Decellularized	Young_Decellularized	25	Q05915	225866	338139	0.582149	0.582149	49.7078	1.49708	0	1.47454e-06	6.11248e-06	24	0.109721	Q05915	GCH1_MOUSE	GTP cyclohydrolase 1	Gch1	Q05915	Mus musculus	tetrahydrobiopterin biosynthetic process,regulation of blood pressure,positive regulation of heart rate,regulation of lung blood pressure,response to interferon-gamma,response to tumor necrosis factor,7,8-dihydroneopterin 3'-triphosphate biosynthetic process,vasodilation,dopamine biosynthetic process,pteridine-containing compound biosynthetic process,negative regulation of blood pressure,tetrahyd…	GTPase activity,GTP cyclohydrolase I activity,calcium ion binding,GTP binding,zinc ion binding,GTP-dependent protein binding,translation initiation factor binding,protein homodimerization activity,coenzyme binding,mitogen-activated protein kinase binding	nucleus,nucleoplasm,cytoplasm,cytosol,cytoplasmic vesicle,nuclear membrane,protein complex	sp	1	1	uniprot_mouse_proteome	>sp|Q05915|GCH1_MOUSE GTP cyclohydrolase 1 OS=Mus musculus GN=Gch1 PE=1 SV=1	5	5
TRUE	Old_Decellularized / Young_Decellularized	Old_Decellularized	Young_Decellularized	35	P01863;P01865	118978	1.01259e+06	3.08928	3.08928	751.069	8.51069	0	1.67164e-06	6.84986e-06	34	0.559272	P01863;P01865	GCAA_MOUSE;GCAM_MOUSE	Ig gamma-2A chain C region, A allele;Ig gamma-2A chain C region, membrane-bound form	Ighg;Igh-1a	P01863;P01865	Mus musculus	phagocytosis, recognition,phagocytosis, engulfment,complement activation, classical pathway,defense response to bacterium,innate immune response,B cell receptor signaling pathway,positive regulation of B cell activation;antibody-dependent cellular cytotoxicity,positive regulation of type IIa hypersensitivity,positive regulation of type I hypersensitivity,humoral immune response mediated by circul…	antigen binding,immunoglobulin receptor binding;antigen binding,immunoglobulin receptor binding	external side of plasma membrane,immunoglobulin complex, circulating,blood microparticle;multivesicular body,cytosol,external side of plasma membrane,integral component of membrane,immunoglobulin complex, circulating,blood microparticle	sp	1	1;3	uniprot_mouse_proteome	>sp|P01863|GCAA_MOUSE Ig gamma-2A chain C region, A allele OS=Mus musculus GN=Ighg PE=1 SV=1;>sp|P01865|GCAM_MOUSE Ig gamma-2A chain C region, membrane-bound form OS=Mus musculus GN=Igh-1a PE=1 SV=3	5	7
TRUE	Old_Decellularized / Young_Decellularized	Old_Decellularized	Young_Decellularized	40	A0A075B5P5;P03987;P03987-2	287755	921127	1.67856	1.67856	220.109	3.20109	0	2.07159e-06	8.39228e-06	39	0.366038	A0A075B5P5;P03987;P03987-2	A0A075B5P5_MOUSE;IGHG3_MOUSE;IGHG3_MOUSE	Protein Ighg3 (Fragment);Ig gamma-3 chain C region;Isoform 2 of Ig gamma-3 chain C region	Ighg3;;	A0A075B5P5;P03987;P03987-2	Mus musculus	;;	;antigen binding,immunoglobulin receptor binding;	;extracellular region,plasma membrane,integral component of membrane;	tr;sp;sp	4;1;	1;2;	uniprot_mouse_proteome	>tr|A0A075B5P5|A0A075B5P5_MOUSE Protein Ighg3 (Fragment) OS=Mus musculus GN=Ighg3 PE=4 SV=1;>sp|P03987|IGHG3_MOUSE Ig gamma-3 chain C region OS=Mus musculus PE=1 SV=2;>sp|P03987-2|IGHG3_MOUSE Isoform 2 of Ig gamma-3 chain C region OS=Mus musculus	7	8
TRUE	Old_Decellularized / Young_Decellularized	Old_Decellularized	Young_Decellularized	35	P11438	887046	1.35709e+06	0.613438	0.613438	52.99	1.5299	0	2.07059e-06	8.39228e-06	34	0.171702	P11438	LAMP1_MOUSE	Lysosome-associated membrane glycoprotein 1	Lamp1	P11438	Mus musculus	spermatogenesis,granzyme-mediated apoptotic signaling pathway,positive regulation of natural killer cell degranulation,positive regulation of natural killer cell mediated cytotoxicity,autophagic cell death,protein stabilization,establishment of protein localization to organelle,Golgi to lysosome transport,regulation of organelle transport along microtubule	protein binding,enzyme binding,protein domain specific binding	cytoplasm,lysosome,endosome,late endosome,multivesicular body,cytosol,plasma membrane,synaptic vesicle,external side of plasma membrane,cell surface,endosome membrane,membrane,integral component of membrane,dendrite,vesicle,sarcolemma,melanosome,neuronal cell body,cytolytic granule,autolysosome,phagocytic vesicle,perinuclear region of cytoplasm,phagolysosome membrane,extracellular exosome,alveola…	sp	1	2	uniprot_mouse_proteome	>sp|P11438|LAMP1_MOUSE Lysosome-associated membrane glycoprotein 1 OS=Mus musculus GN=Lamp1 PE=1 SV=2	4	7
TRUE	Old_Decellularized / Young_Decellularized	Old_Decellularized	Young_Decellularized	25	P28798;Q3U9N4	131460	480162	1.8689	1.8689	265.254	3.65254	0	2.14933e-06	8.65806e-06	24	0.478974	P28798;Q3U9N4	GRN_MOUSE;Q3U9N4_MOUSE	Granulins	Grn	P28798;Q3U9N4	Mus musculus	blastocyst hatching,embryo implantation,regulation of receptor activity,positive regulation of epithelial cell proliferation;	RNA binding,cytokine activity;	extracellular space,mitochondrion,lysosome,endosome,endoplasmic reticulum,extracellular exosome;	sp;tr	1	2;1	uniprot_mouse_proteome	>sp|P28798|GRN_MOUSE Granulins OS=Mus musculus GN=Grn PE=1 SV=2;>tr|Q3U9N4|Q3U9N4_MOUSE Granulins OS=Mus musculus GN=Grn PE=1 SV=1	3	5
TRUE	Old_Decellularized / Young_Decellularized	Old_Decellularized	Young_Decellularized	15	Q9CWE6	500411	49460.7	-3.33876	3.33876	-90.116	0.0988401	0	2.50868e-06	9.88226e-06	14	0.411145	Q9CWE6	OOEP_MOUSE	Oocyte-expressed protein homolog	Ooep	Q9CWE6	Mus musculus	in utero embryonic development,protein phosphorylation,embryo implantation,fertilization,embryonic pattern specification,establishment or maintenance of apical/basal cell polarity,cellular protein complex assembly	RNA binding,protein binding	cell cortex,protein complex,apical part of cell	sp	1	1	uniprot_mouse_proteome	>sp|Q9CWE6|OOEP_MOUSE Oocyte-expressed protein homolog OS=Mus musculus GN=Ooep PE=1 SV=1	3	3
TRUE	Old_Decellularized / Young_Decellularized	Old_Decellularized	Young_Decellularized	35	O70165	166923	556788	1.73795	1.73795	233.56	3.3356	0	2.75861e-06	1.0748e-05	34	0.384687	O70165	FCN1_MOUSE	Ficolin-1	Fcn1	O70165	Mus musculus	complement activation, lectin pathway,cell surface pattern recognition receptor signaling pathway,G-protein coupled receptor signaling pathway,positive regulation of interleukin-8 secretion	protein binding,signaling pattern recognition receptor activity,carbohydrate binding,metal ion binding,carbohydrate derivative binding	extracellular region,collagen trimer,extrinsic component of external side of plasma membrane	sp	1	1	uniprot_mouse_proteome	>sp|O70165|FCN1_MOUSE Ficolin-1 OS=Mus musculus GN=Fcn1 PE=1 SV=1	6	7
TRUE	Old_Decellularized / Young_Decellularized	Old_Decellularized	Young_Decellularized	25	Q9QUH0	142238	250806	0.818262	0.818262	76.328	1.76328	0	3.05766e-06	1.18163e-05	24	0.135382	Q9QUH0	GLRX1_MOUSE	Glutaredoxin-1	Glrx	Q9QUH0	Mus musculus	cell redox homeostasis,positive regulation of membrane potential,oxidation-reduction process,positive regulation of sodium ion transmembrane transporter activity	electron carrier activity,protein disulfide oxidoreductase activity,glutathione disulfide oxidoreductase activity,protein-disulfide reductase (glutathione) activity,protein N-terminus binding	nucleus,cytoplasm,mitochondrion,extracellular exosome	sp	1	3	uniprot_mouse_proteome	>sp|Q9QUH0|GLRX1_MOUSE Glutaredoxin-1 OS=Mus musculus GN=Glrx PE=1 SV=3	4	5
TRUE	Old_Decellularized / Young_Decellularized	Old_Decellularized	Young_Decellularized	45	Q8VDC1	159878	249728	0.643381	0.643381	56.1986	1.56199	0	3.49755e-06	1.33356e-05	44	0.112089	Q8VDC1	FYCO1_MOUSE	FYVE and coiled-coil domain-containing protein 1	Fyco1	Q8VDC1	Mus musculus	'de novo' protein folding,chaperone-mediated protein folding,plus-end-directed vesicle transport along microtubule,positive regulation of autophagosome maturation	ATP binding,protein binding involved in protein folding,metal ion binding,unfolded protein binding	lysosome,late endosome,autophagosome,Golgi apparatus,membrane,integral component of membrane,intracellular membrane-bounded organelle,chaperonin-containing T-complex	sp	1	1	uniprot_mouse_proteome	>sp|Q8VDC1|FYCO1_MOUSE FYVE and coiled-coil domain-containing protein 1 OS=Mus musculus GN=Fyco1 PE=1 SV=1	9	9
TRUE	Old_Decellularized / Young_Decellularized	Old_Decellularized	Young_Decellularized	30	Q64735;Q64735-2	350348	581161	0.730152	0.730152	65.8813	1.65881	0	3.54973e-06	1.34984e-05	29	0.195851	Q64735;Q64735-2	CR1L_MOUSE	Complement component receptor 1-like protein;Isoform 2 of Complement component receptor 1-like protein	Cr1l	Q64735;Q64735-2	Mus musculus	in utero embryonic development,complement activation, classical pathway,female pregnancy,regulation of complement activation,innate immune response,negative regulation of complement activation;	;	external side of plasma membrane,integral component of membrane,receptor complex;	sp	1;	1;	uniprot_mouse_proteome	>sp|Q64735|CR1L_MOUSE Complement component receptor 1-like protein OS=Mus musculus GN=Cr1l PE=1 SV=1;>sp|Q64735-2|CR1L_MOUSE Isoform 2 of Complement component receptor 1-like protein OS=Mus musculus GN=Cr1l	6	6
TRUE	Old_Decellularized / Young_Decellularized	Old_Decellularized	Young_Decellularized	15	Q8R3I2;Q8R3I2-2;Q8R3I2-3	300794	127331	-1.2402	1.2402	-57.6685	0.423315	0	3.65616e-06	1.37928e-05	14	0.170291	Q8R3I2;Q8R3I2-2;Q8R3I2-3	MBOA2_MOUSE	Lysophospholipid acyltransferase 2;Isoform 2 of Lysophospholipid acyltransferase 2;Isoform 3 of Lysophospholipid acyltransferase 2	Mboat2	Q8R3I2;Q8R3I2-2;Q8R3I2-3	Mus musculus	biological_process,phospholipid biosynthetic process;;	molecular_function,1-acylglycerophosphocholine O-acyltransferase activity;;	cellular_component,endoplasmic reticulum,integral component of membrane;;	sp	1;;	1;;	uniprot_mouse_proteome	>sp|Q8R3I2|MBOA2_MOUSE Lysophospholipid acyltransferase 2 OS=Mus musculus GN=Mboat2 PE=1 SV=1;>sp|Q8R3I2-2|MBOA2_MOUSE Isoform 2 of Lysophospholipid acyltransferase 2 OS=Mus musculus GN=Mboat2;>sp|Q8R3I2-3|MBOA2_MOUSE Isoform 3 of Lysophospholipid acyltransferase 2 OS=Mus musculus GN=Mboat2	3	3
TRUE	Old_Decellularized / Young_Decellularized	Old_Decellularized	Young_Decellularized	25	P05784	8865976	4.9061e+06	-0.853703	0.853703	-44.6637	0.553363	0	3.86045e-06	1.4411e-05	24	0.129502	P05784	K1C18_MOUSE	Keratin, type I cytoskeletal 18	Krt18	P05784	Mus musculus	tumor necrosis factor-mediated signaling pathway,Golgi to plasma membrane CFTR protein transport,negative regulation of apoptotic process,intermediate filament cytoskeleton organization,extrinsic apoptotic signaling pathway,hepatocyte apoptotic process,cell-cell adhesion	RNA binding,structural molecule activity,protein binding,scaffold protein binding,cadherin binding involved in cell-cell adhesion	nucleolus,cytoplasm,microtubule organizing center,cytosol,intermediate filament,cell-cell adherens junction,nuclear matrix,centriolar satellite,keratin filament,extracellular exosome,cell periphery	sp	1	5	uniprot_mouse_proteome	>sp|P05784|K1C18_MOUSE Keratin, type I cytoskeletal 18 OS=Mus musculus GN=Krt18 PE=1 SV=5	4	5
TRUE	Old_Decellularized / Young_Decellularized	Old_Decellularized	Young_Decellularized	95	Q06890	2.55375e+06	4.4766e+06	0.809785	0.809785	75.295	1.75295	0	5.35529e-06	1.90916e-05	94	0.136092	Q06890	CLUS_MOUSE	Clusterin	Clu	Q06890	Mus musculus	cell morphogenesis,microglial cell activation,response to virus,protein import,central nervous system myelin maintenance,positive regulation of proteasomal ubiquitin-dependent protein catabolic process,negative regulation of protein homooligomerization,positive regulation of protein homooligomerization,positive regulation of tumor necrosis factor production,positive regulation of apoptotic proces…	beta-amyloid binding,protein binding,ubiquitin protein ligase binding,protein complex binding,low-density lipoprotein particle receptor binding,misfolded protein binding,ATPase activity	extracellular space,nucleus,cytoplasm,mitochondrion,endoplasmic reticulum,cytosol,cell surface,extracellular matrix,mitochondrial membrane,spherical high-density lipoprotein particle,chromaffin granule,protein complex,perinuclear region of cytoplasm,extracellular exosome,blood microparticle,neurofibrillary tangle,apical dendrite,cell periphery	sp	1	1	uniprot_mouse_proteome	>sp|Q06890|CLUS_MOUSE Clusterin OS=Mus musculus GN=Clu PE=1 SV=1	13	19
TRUE	Old_Decellularized / Young_Decellularized	Old_Decellularized	Young_Decellularized	30	P11679	184476	107694	-0.776493	0.776493	-41.6216	0.583784	0	7.15194e-06	2.48748e-05	29	0.143201	P11679	K2C8_MOUSE	Keratin, type II cytoskeletal 8	Krt8	P11679	Mus musculus	cell morphogenesis involved in differentiation,multicellular organism development,tumor necrosis factor-mediated signaling pathway,sarcomere organization,response to hydrostatic pressure,response to other organism,cell differentiation involved in embryonic placenta development,extrinsic apoptotic signaling pathway,hepatocyte apoptotic process	structural molecule activity,protein binding,protein complex binding,scaffold protein binding	nucleus,nucleoplasm,cytoplasm,intermediate filament,cell-cell junction,dystrophin-associated glycoprotein complex,apicolateral plasma membrane,nuclear matrix,Z disc,sarcolemma,costamere,keratin filament,intermediate filament cytoskeleton,extracellular exosome,cell periphery	sp	1	4	uniprot_mouse_proteome	>sp|P11679|K2C8_MOUSE Keratin, type II cytoskeletal 8 OS=Mus musculus GN=Krt8 PE=1 SV=4	5	6
TRUE	Old_Decellularized / Young_Decellularized	Old_Decellularized	Young_Decellularized	20	Q3UIR3	39499.3	82575.6	1.06389	1.06389	109.056	2.09056	0	7.95975e-06	2.72851e-05	19	0.247753	Q3UIR3	DTX3L_MOUSE	E3 ubiquitin-protein ligase DTX3L	Dtx3l	Q3UIR3	Mus musculus	positive regulation of defense response to virus by host,double-strand break repair,cellular response to DNA damage stimulus,endosome to lysosome transport,histone monoubiquitination,positive regulation of protein binding,histone H2A ubiquitination,histone H2B ubiquitination,positive regulation of chromatin binding,protein ubiquitination involved in ubiquitin-dependent protein catabolic process,p…	ubiquitin-protein transferase activity,enzyme inhibitor activity,enzyme activator activity,enzyme binding,histone binding,ubiquitin-like protein ligase binding,metal ion binding,STAT family protein binding	nucleus,nucleoplasm,cytoplasm,lysosome,cytosol,protein complex,early endosome	sp	1	1	uniprot_mouse_proteome	>sp|Q3UIR3|DTX3L_MOUSE E3 ubiquitin-protein ligase DTX3L OS=Mus musculus GN=Dtx3l PE=1 SV=1	4	4
TRUE	Old_Decellularized / Young_Decellularized	Old_Decellularized	Young_Decellularized	15	Q922H2	222193	144147	-0.624276	0.624276	-35.1255	0.648745	0	8.19712e-06	2.79644e-05	14	0.0868723	Q922H2	PDK3_MOUSE	[Pyruvate dehydrogenase (acetyl-transferring)] kinase isozyme 3, mitochondrial	Pdk3	Q922H2	Mus musculus	glucose metabolic process,regulation of acetyl-CoA biosynthetic process from pyruvate,regulation of glucose metabolic process,peptidyl-serine phosphorylation,peroxisome proliferator activated receptor signaling pathway,cellular response to glucose stimulus,cellular response to fatty acid,hypoxia-inducible factor-1alpha signaling pathway,regulation of reactive oxygen species metabolic process	protein kinase activity,protein serine/threonine kinase activity,pyruvate dehydrogenase (acetyl-transferring) kinase activity,ATP binding	nucleolus,mitochondrion,mitochondrial matrix	sp	1	1	uniprot_mouse_proteome	>sp|Q922H2|PDK3_MOUSE [Pyruvate dehydrogenase (acetyl-transferring)] kinase isozyme 3, mitochondrial OS=Mus musculus GN=Pdk3 PE=1 SV=1	3	3
TRUE	Old_Decellularized / Young_Decellularized	Old_Decellularized	Young_Decellularized	35	A2AUD5;Q3TAI4;Q9CYZ2	318171	521042	0.711599	0.711599	63.7618	1.63762	0	8.82678e-06	2.96164e-05	34	0.131367	A2AUD5;Q3TAI4;Q9CYZ2	A2AUD5_MOUSE;Q3TAI4_MOUSE;TPD54_MOUSE	Tumor protein D54;Tumor protein D52-like 2, isoform CRA_c;Tumor protein D54	Tpd52l2	A2AUD5;Q3TAI4;Q9CYZ2	Mus musculus	;;biological_process	;;RNA binding,protein homodimerization activity,protein heterodimerization activity	;;cytoplasm,perinuclear region of cytoplasm	tr;tr;sp	1	1	uniprot_mouse_proteome	>tr|A2AUD5|A2AUD5_MOUSE Tumor protein D54 OS=Mus musculus GN=Tpd52l2 PE=1 SV=1;>tr|Q3TAI4|Q3TAI4_MOUSE Tumor protein D52-like 2, isoform CRA_c OS=Mus musculus GN=Tpd52l2 PE=1 SV=1;>sp|Q9CYZ2|TPD54_MOUSE Tumor protein D54 OS=Mus musculus GN=Tpd52l2 PE=1 SV=1	7	7
TRUE	Old_Decellularized / Young_Decellularized	Old_Decellularized	Young_Decellularized	35	Q01320	331962	164670	-1.01143	1.01143	-50.3947	0.496053	0	8.91757e-06	2.97809e-05	34	0.289605	Q01320	TOP2A_MOUSE	DNA topoisomerase 2-alpha	Top2a	Q01320	Mus musculus	resolution of meiotic recombination intermediates,sister chromatid segregation,hematopoietic progenitor cell differentiation,DNA topological change,DNA ligation,cellular response to DNA damage stimulus,chromosome segregation,chromosome condensation,apoptotic chromosome condensation,embryonic cleavage,regulation of circadian rhythm,positive regulation of apoptotic process,mitotic DNA integrity che…	magnesium ion binding,DNA binding,chromatin binding,RNA binding,DNA topoisomerase type II (ATP-hydrolyzing) activity,protein kinase C binding,protein binding,ATP binding,protein C-terminus binding,DNA-dependent ATPase activity,drug binding,DNA binding, bending,enzyme binding,protein homodimerization activity,histone deacetylase binding,ubiquitin binding,protein heterodimerization activity	condensed chromosome,nucleus,nucleoplasm,nucleolus,DNA topoisomerase complex (ATP-hydrolyzing),intracellular ribonucleoprotein complex,protein complex,nuclear chromosome,centriole	sp	1	2	uniprot_mouse_proteome	>sp|Q01320|TOP2A_MOUSE DNA topoisomerase 2-alpha OS=Mus musculus GN=Top2a PE=1 SV=2	6	7
TRUE	Old_Decellularized / Young_Decellularized	Old_Decellularized	Young_Decellularized	25	Q8K2V6;Q8K2V6-2	197177	108569	-0.860886	0.860886	-44.9386	0.550614	0	9.24263e-06	3.07636e-05	24	0.149352	Q8K2V6;Q8K2V6-2	IPO11_MOUSE	Importin-11;Isoform 2 of Importin-11	Ipo11	Q8K2V6;Q8K2V6-2	Mus musculus	ribosomal protein import into nucleus,transcription factor import into nucleus;	protein binding,Ran GTPase binding,protein transporter activity;	fibrillar center,nucleus,nuclear envelope,cytosol;	sp	1;	1;	uniprot_mouse_proteome	>sp|Q8K2V6|IPO11_MOUSE Importin-11 OS=Mus musculus GN=Ipo11 PE=1 SV=1;>sp|Q8K2V6-2|IPO11_MOUSE Isoform 2 of Importin-11 OS=Mus musculus GN=Ipo11	5	5
TRUE	Old_Decellularized / Young_Decellularized	Old_Decellularized	Young_Decellularized	35	P11440	526532	257512	-1.03188	1.03188	-51.0927	0.489073	0	1.05178e-05	3.401e-05	34	0.258179	P11440	CDK1_MOUSE	Cyclin-dependent kinase 1	Cdk1	P11440	Mus musculus	regulation of transcription involved in G1/S transition of mitotic cell cycle,microtubule cytoskeleton organization,DNA repair,protein complex assembly,protein phosphorylation,apoptotic process,mitotic G2 DNA damage checkpoint,cell aging,cell proliferation,response to toxic substance,regulation of gene expression,positive regulation of gene expression,positive regulation of G2/M transition of mit…	chromatin binding,protein kinase activity,protein serine/threonine kinase activity,cyclin-dependent protein serine/threonine kinase activity,protein binding,ATP binding,RNA polymerase II carboxy-terminal domain kinase activity,kinase activity,cyclin binding,Hsp70 protein binding,histone kinase activity,cyclin-dependent protein kinase activity	cyclin-dependent protein kinase holoenzyme complex,nuclear chromosome, telomeric region,nucleus,nucleoplasm,centrosome,cytosol,spindle microtubule,membrane,midbody,extracellular exosome,mitotic spindle,cyclin B1-CDK1 complex,mitochondrial matrix	sp	1	3	uniprot_mouse_proteome	>sp|P11440|CDK1_MOUSE Cyclin-dependent kinase 1 OS=Mus musculus GN=Cdk1 PE=1 SV=3	6	7
TRUE	Old_Decellularized / Young_Decellularized	Old_Decellularized	Young_Decellularized	20	Q3THS6	286080	185257	-0.626891	0.626891	-35.243	0.64757	0	1.07302e-05	3.46182e-05	19	0.108108	Q3THS6	METK2_MOUSE	S-adenosylmethionine synthase isoform type-2	Mat2a	Q3THS6	Mus musculus	S-adenosylmethionine biosynthetic process,one-carbon metabolic process,protein hexamerization,protein heterooligomerization,cellular response to leukemia inhibitory factor	methionine adenosyltransferase activity,ATP binding,identical protein binding,metal ion binding	cytosol,methionine adenosyltransferase complex	sp	1	2	uniprot_mouse_proteome	>sp|Q3THS6|METK2_MOUSE S-adenosylmethionine synthase isoform type-2 OS=Mus musculus GN=Mat2a PE=1 SV=2	4	4
TRUE	Old_Decellularized / Young_Decellularized	Old_Decellularized	Young_Decellularized	45	Q99M71	3362088	5.33932e+06	0.667299	0.667299	58.8097	1.5881	0	1.15352e-05	3.69646e-05	44	0.173026	Q99M71	EPDR1_MOUSE	Mammalian ependymin-related protein 1	Epdr1	Q99M71	Mus musculus	cell-matrix adhesion,biological_process	molecular_function,calcium ion binding	extracellular space,lysosome,extracellular exosome	sp	1	1	uniprot_mouse_proteome	>sp|Q99M71|EPDR1_MOUSE Mammalian ependymin-related protein 1 OS=Mus musculus GN=Epdr1 PE=1 SV=1	7	9
TRUE	Old_Decellularized / Young_Decellularized	Old_Decellularized	Young_Decellularized	45	P08207	1687116	2.82986e+06	0.746172	0.746172	67.7336	1.67734	0	1.44616e-05	4.52241e-05	44	0.466178	P08207	S10AA_MOUSE	Protein S100-A10	S100a10	P08207	Mus musculus	membrane raft assembly,membrane budding,response to drug,positive regulation of GTPase activity,positive regulation of binding,protein heterotetramerization,positive regulation of stress fiber assembly,positive regulation of focal adhesion assembly,protein localization to plasma membrane,positive regulation of substrate adhesion-dependent cell spreading	calcium ion binding,protein binding,protein homodimerization activity,ion channel binding	endoplasmic reticulum,extrinsic component of plasma membrane,extracellular exosome,membrane raft	sp	1	2	uniprot_mouse_proteome	>sp|P08207|S10AA_MOUSE Protein S100-A10 OS=Mus musculus GN=S100a10 PE=1 SV=2	5	9
TRUE	Old_Decellularized / Young_Decellularized	Old_Decellularized	Young_Decellularized	25	D3Z2Z1;D3Z3M7;F8WIA1;Q922J3;Q922J3-2	225937	513032	1.18313	1.18313	127.069	2.27069	0	1.46735e-05	4.56866e-05	24	0.231839	D3Z2Z1;D3Z3M7;F8WIA1;Q922J3;Q922J3-2	D3Z2Z1_MOUSE;D3Z3M7_MOUSE;F8WIA1_MOUSE;CLIP1_MOUSE;CLIP1_MOUSE	CAP-Gly domain-containing linker protein 1;CAP-Gly domain-containing linker protein 1;CAP-Gly domain-containing linker protein 1;CAP-Gly domain-containing linker protein 1;Isoform 2 of CAP-Gly domain-containing linker protein 1	Clip1	D3Z2Z1;D3Z3M7;F8WIA1;Q922J3;Q922J3-2	Mus musculus	;;;microtubule bundle formation,positive regulation of microtubule polymerization,protein transport into plasma membrane raft;	;;;protein binding,microtubule binding,zinc ion binding,tubulin binding,microtubule plus-end binding;	;;;ruffle,nuclear envelope,centrosome,microtubule,microtubule cytoskeleton,cytoplasmic vesicle membrane,microtubule plus-end,cytoplasmic microtubule,macropinosome;	tr;tr;tr;sp;sp	1;1;1;1;	1;1;1;1;	uniprot_mouse_proteome	>tr|D3Z2Z1|D3Z2Z1_MOUSE CAP-Gly domain-containing linker protein 1 OS=Mus musculus GN=Clip1 PE=1 SV=1;>tr|D3Z3M7|D3Z3M7_MOUSE CAP-Gly domain-containing linker protein 1 OS=Mus musculus GN=Clip1 PE=1 SV=1;>tr|F8WIA1|F8WIA1_MOUSE CAP-Gly domain-containing linker protein 1 OS=Mus musculus GN=Clip1 PE=1 SV=1;>sp|Q922J3|CLIP1_MOUSE CAP-Gly domain-containing linker protein 1 OS=Mus musculus GN=Clip1 PE…	5	5
TRUE	Old_Decellularized / Young_Decellularized	Old_Decellularized	Young_Decellularized	15	Q9DBC0	33117.9	49744.9	0.58694	0.58694	50.2057	1.50206	0	1.57809e-05	4.88147e-05	14	0.103155	Q9DBC0	SELO_MOUSE	Selenoprotein O	Selo	Q9DBC0	Mus musculus	biological_process	molecular_function	mitochondrion	sp	1	4	uniprot_mouse_proteome	>sp|Q9DBC0|SELO_MOUSE Selenoprotein O OS=Mus musculus GN=Selo PE=1 SV=4	3	3
TRUE	Old_Decellularized / Young_Decellularized	Old_Decellularized	Young_Decellularized	15	P00375	236331	128660	-0.877245	0.877245	-45.5594	0.544406	0	1.63825e-05	5.03478e-05	14	0.133368	P00375	DYR_MOUSE	Dihydrofolate reductase	Dhfr	P00375	Mus musculus	glycine biosynthetic process,tetrahydrobiopterin biosynthetic process,one-carbon metabolic process,nucleotide biosynthetic process,negative regulation of translation,axon regeneration,response to methotrexate,response to nicotine,dihydrofolate metabolic process,tetrahydrofolate metabolic process,tetrahydrofolate biosynthetic process,folic acid metabolic process,regulation of nitric-oxide synthase…	translation repressor activity, nucleic acid binding,mRNA binding,dihydrofolate reductase activity,folic acid binding,drug binding,methotrexate binding,dihydrofolic acid binding,NADPH binding,sequence-specific mRNA binding	cytoplasm,mitochondrion,cytosol	sp	1	3	uniprot_mouse_proteome	>sp|P00375|DYR_MOUSE Dihydrofolate reductase OS=Mus musculus GN=Dhfr PE=1 SV=3	3	3
TRUE	Old_Decellularized / Young_Decellularized	Old_Decellularized	Young_Decellularized	25	Q6HA09;Q6HA09-2	297681	34414.4	-3.11268	3.11268	-88.4392	0.115608	0	1.65675e-05	5.08071e-05	24	0.590159	Q6HA09;Q6HA09-2	ASTL_MOUSE	Astacin-like metalloendopeptidase;Isoform 2 of Astacin-like metalloendopeptidase	Astl	Q6HA09;Q6HA09-2	Mus musculus	proteolysis,cell adhesion,fertilization,positive regulation of protein processing,prevention of polyspermy,negative regulation of binding of sperm to zona pellucida;	metalloendopeptidase activity,protein binding,peptidase activity,zinc ion binding,aspartic-type peptidase activity,glutamic-type peptidase activity;	cytoplasm,plasma membrane,transport vesicle,cortical granule;	sp	1;	3;	uniprot_mouse_proteome	>sp|Q6HA09|ASTL_MOUSE Astacin-like metalloendopeptidase OS=Mus musculus GN=Astl PE=1 SV=3;>sp|Q6HA09-2|ASTL_MOUSE Isoform 2 of Astacin-like metalloendopeptidase OS=Mus musculus GN=Astl	5	5
TRUE	Old_Decellularized / Young_Decellularized	Old_Decellularized	Young_Decellularized	25	B1AWE0;Q6PFA2	336698	687408	1.02971	1.02971	104.161	2.04161	0	1.7045e-05	5.19361e-05	24	0.188305	B1AWE0;Q6PFA2	B1AWE0_MOUSE;Q6PFA2_MOUSE	Clathrin light chain A	Clta	B1AWE0;Q6PFA2	Mus musculus	;	;	;	tr	1	1	uniprot_mouse_proteome	>tr|B1AWE0|B1AWE0_MOUSE Clathrin light chain A OS=Mus musculus GN=Clta PE=1 SV=1;>tr|Q6PFA2|Q6PFA2_MOUSE Clathrin light chain A OS=Mus musculus GN=Clta PE=1 SV=1	4	5
TRUE	Old_Decellularized / Young_Decellularized	Old_Decellularized	Young_Decellularized	40	A0A0R4J0B2;Q8VCI0	643925	350550	-0.87727	0.87727	-45.5603	0.544397	0	1.93403e-05	5.80615e-05	39	0.141194	A0A0R4J0B2;Q8VCI0	A0A0R4J0B2_MOUSE;PLBL1_MOUSE	Phospholipase B-like 1	Plbd1	A0A0R4J0B2;Q8VCI0	Mus musculus	;biological_process,lipid catabolic process	;molecular_function,hydrolase activity	;extracellular space,lysosome	tr;sp	1	1	uniprot_mouse_proteome	>tr|A0A0R4J0B2|A0A0R4J0B2_MOUSE Phospholipase B-like 1 OS=Mus musculus GN=Plbd1 PE=1 SV=1;>sp|Q8VCI0|PLBL1_MOUSE Phospholipase B-like 1 OS=Mus musculus GN=Plbd1 PE=1 SV=1	8	8
TRUE	Old_Decellularized / Young_Decellularized	Old_Decellularized	Young_Decellularized	25	A2ANY6;J3QMC5	93100.2	47223.4	-0.979281	0.979281	-49.2767	0.507233	0	1.96339e-05	5.86958e-05	24	0.188612	A2ANY6;J3QMC5	A2ANY6_MOUSE;J3QMC5_MOUSE	Protein Mdn1	Mdn1	A2ANY6;J3QMC5	Mus musculus	ribosomal large subunit assembly,rRNA processing;	molecular_function,ATP binding,ATPase activity;	nucleus,nucleolus,cytosol,membrane,preribosome, large subunit precursor,intermediate filament cytoskeleton;	tr	1	1	uniprot_mouse_proteome	>tr|A2ANY6|A2ANY6_MOUSE Protein Mdn1 OS=Mus musculus GN=Mdn1 PE=1 SV=1;>tr|J3QMC5|J3QMC5_MOUSE Protein Mdn1 OS=Mus musculus GN=Mdn1 PE=1 SV=1	5	5
TRUE	Old_Decellularized / Young_Decellularized	Old_Decellularized	Young_Decellularized	30	P58871	96436.2	165438	0.778643	0.778643	71.5517	1.71552	0	2.16196e-05	6.43622e-05	29	0.246233	P58871	TB182_MOUSE	182 kDa tankyrase-1-binding protein	Tnks1bp1	P58871	Mus musculus	double-strand break repair,positive regulation of peptidyl-threonine phosphorylation,positive regulation of protein autophosphorylation,positive regulation of peptidyl-serine phosphorylation,cellular response to ionizing radiation	enzyme binding,macromolecular complex binding,cadherin binding,ankyrin repeat binding	nucleus,nuclear heterochromatin,cytoplasm,cytoskeleton,cell-cell adherens junction,CCR4-NOT complex	sp	1	2	uniprot_mouse_proteome	>sp|P58871|TB182_MOUSE 182 kDa tankyrase-1-binding protein OS=Mus musculus GN=Tnks1bp1 PE=1 SV=2	6	6
TRUE	Old_Decellularized / Young_Decellularized	Old_Decellularized	Young_Decellularized	60	Q8CFJ7	755038	1.23857e+06	0.71406	0.71406	64.0414	1.64041	0	2.32827e-05	6.87394e-05	59	0.502092	Q8CFJ7	S2545_MOUSE	Solute carrier family 25 member 45	Slc25a45	Q8CFJ7	Mus musculus	mitochondrial transport,transmembrane transport,mitochondrial ornithine transport	transmembrane transporter activity,L-ornithine transmembrane transporter activity	mitochondrion,mitochondrial inner membrane,integral component of membrane	sp	1	1	uniprot_mouse_proteome	>sp|Q8CFJ7|S2545_MOUSE Solute carrier family 25 member 45 OS=Mus musculus GN=Slc25a45 PE=1 SV=1	9	12
TRUE	Old_Decellularized / Young_Decellularized	Old_Decellularized	Young_Decellularized	40	P41317	628498	1.57127e+06	1.32195	1.32195	150.004	2.50004	0	2.34279e-05	6.90251e-05	39	0.377795	P41317	MBL2_MOUSE	Mannose-binding protein C	Mbl2	P41317	Mus musculus	complement activation, lectin pathway,complement activation, classical pathway,negative regulation of growth of symbiont in host,innate immune response,negative regulation of viral process,positive regulation of phagocytosis,defense response to Gram-positive bacterium,killing by host of symbiont cells	receptor binding,calcium ion binding,mannose binding,calcium-dependent protein binding	collagen trimer,extracellular space	sp	1	2	uniprot_mouse_proteome	>sp|P41317|MBL2_MOUSE Mannose-binding protein C OS=Mus musculus GN=Mbl2 PE=1 SV=2	6	8
TRUE	Old_Decellularized / Young_Decellularized	Old_Decellularized	Young_Decellularized	20	C0HK79;C0HK80	331308	203288	-0.70465	0.70465	-38.6408	0.613592	0	2.58779e-05	7.54641e-05	19	0.158759	C0HK79;C0HK80	ARXS1_MOUSE;ARXS2_MOUSE	Adipocyte-related X-chromosome expressed sequence 1;Adipocyte-related X-chromosome expressed sequence 2	Arxes1;Arxes2	C0HK79;C0HK80	Mus musculus	signal peptide processing,fat cell differentiation;signal peptide processing,fat cell differentiation	peptidase activity;molecular_function,peptidase activity	endoplasmic reticulum,signal peptidase complex,integral component of membrane;endoplasmic reticulum,signal peptidase complex,integral component of membrane	sp	1	1	uniprot_mouse_proteome	>sp|C0HK79|ARXS1_MOUSE Adipocyte-related X-chromosome expressed sequence 1 OS=Mus musculus GN=Arxes1 PE=1 SV=1;>sp|C0HK80|ARXS2_MOUSE Adipocyte-related X-chromosome expressed sequence 2 OS=Mus musculus GN=Arxes2 PE=1 SV=1	3	4
TRUE	Old_Decellularized / Young_Decellularized	Old_Decellularized	Young_Decellularized	20	Q19LI2	112051	213039	0.926968	0.926968	90.1276	1.90128	0	2.81908e-05	8.10485e-05	19	0.22259	Q19LI2	A1BG_MOUSE	Alpha-1B-glycoprotein	A1bg	Q19LI2	Mus musculus	biological_process	molecular_function	extracellular region,extracellular space,extracellular matrix,extracellular exosome,blood microparticle	sp	1	1	uniprot_mouse_proteome	>sp|Q19LI2|A1BG_MOUSE Alpha-1B-glycoprotein OS=Mus musculus GN=A1bg PE=1 SV=1	4	4
TRUE	Old_Decellularized / Young_Decellularized	Old_Decellularized	Young_Decellularized	30	P15864	27903402	18563444	-0.587977	0.587977	-33.4725	0.665275	0	3.11725e-05	8.81985e-05	29	0.119368	P15864	H12_MOUSE	Histone H1.2	Hist1h1c	P15864	Mus musculus	negative regulation of transcription from RNA polymerase II promoter,nucleosome assembly,regulation of transcription from RNA polymerase II promoter,nucleosome positioning,histone H3-K4 trimethylation,histone H3-K27 trimethylation	DNA binding,RNA binding,protein binding,chromatin DNA binding	nucleosome,nucleus,nuclear euchromatin,transcriptionally active chromatin	sp	1	2	uniprot_mouse_proteome	>sp|P15864|H12_MOUSE Histone H1.2 OS=Mus musculus GN=Hist1h1c PE=1 SV=2	2	6
TRUE	Old_Decellularized / Young_Decellularized	Old_Decellularized	Young_Decellularized	25	P54276	328494	195261	-0.750465	0.750465	-40.5588	0.594412	0	3.35932e-05	9.48592e-05	24	0.268785	P54276	MSH6_MOUSE	DNA mismatch repair protein Msh6	Msh6	P54276	Mus musculus	DNA repair,mismatch repair,determination of adult lifespan,intrinsic apoptotic signaling pathway in response to DNA damage,response to UV,somatic hypermutation of immunoglobulin genes,somatic recombination of immunoglobulin gene segments,maintenance of DNA repeat elements,isotype switching,positive regulation of isotype switching,negative regulation of DNA recombination,positive regulation of hel…	four-way junction DNA binding,DNA binding,chromatin binding,damaged DNA binding,DNA-dependent ATPase activity,mismatched DNA binding,guanine/thymine mispair binding,single base insertion or deletion binding,methylated histone binding,magnesium ion binding,double-stranded DNA binding,ATP binding,ATPase activity,single guanine insertion binding,single thymine insertion binding,oxidized purine DNA b…	nuclear chromatin,nucleoplasm,Golgi apparatus,cytosol,MutSalpha complex,intracellular membrane-bounded organelle	sp	1	3	uniprot_mouse_proteome	>sp|P54276|MSH6_MOUSE DNA mismatch repair protein Msh6 OS=Mus musculus GN=Msh6 PE=1 SV=3	5	5
TRUE	Old_Decellularized / Young_Decellularized	Old_Decellularized	Young_Decellularized	15	Q62433	38301	74397.3	0.957867	0.957867	94.2435	1.94244	0	3.41791e-05	9.59438e-05	14	0.186421	Q62433	NDRG1_MOUSE	Protein NDRG1	Ndrg1	Q62433	Mus musculus	signal transduction,negative regulation of cell proliferation,DNA damage response, signal transduction by p53 class mediator,peripheral nervous system myelin maintenance,mast cell activation,cellular response to hypoxia,positive regulation of spindle checkpoint	microtubule binding,Rab GTPase binding,gamma-tubulin binding,cadherin binding	nucleus,cytoplasm,centrosome,cytosol,microtubule,plasma membrane,cell-cell adherens junction,microtubule cytoskeleton,myelin sheath,perinuclear region of cytoplasm,recycling endosome membrane,extracellular exosome	sp	1	1	uniprot_mouse_proteome	>sp|Q62433|NDRG1_MOUSE Protein NDRG1 OS=Mus musculus GN=Ndrg1 PE=1 SV=1	3	3
TRUE	Old_Decellularized / Young_Decellularized	Old_Decellularized	Young_Decellularized	15	P40237	34393.9	78229	1.18555	1.18555	127.451	2.27451	0	3.44006e-05	9.60196e-05	14	0.233954	P40237	CD82_MOUSE	CD82 antigen	Cd82	P40237	Mus musculus	cell surface receptor signaling pathway		integral component of plasma membrane,extracellular exosome	sp	1	1	uniprot_mouse_proteome	>sp|P40237|CD82_MOUSE CD82 antigen OS=Mus musculus GN=Cd82 PE=1 SV=1	3	3
TRUE	Old_Decellularized / Young_Decellularized	Old_Decellularized	Young_Decellularized	25	Q9D8B3	389674	617731	0.66471	0.66471	58.5249	1.58525	0	3.95237e-05	0.000108178	24	0.20482	Q9D8B3	CHM4B_MOUSE	Charged multivesicular body protein 4b	Chmp4b	Q9D8B3	Mus musculus	mitotic cytokinesis,cell separation after cytokinesis,posttranslational protein targeting to membrane,autophagy,nucleus organization,vacuolar transport,mitotic metaphase plate congression,exit from mitosis,regulation of autophagy,regulation of centrosome duplication,nuclear envelope reassembly,maintenance of lens transparency,viral budding via host ESCRT complex,viral budding,regulation of viral …	protein binding,identical protein binding,protein homodimerization activity,cadherin binding	ESCRT III complex,nucleus,nuclear envelope,cytoplasm,endosome,cytosol,cytoplasmic side of plasma membrane,membrane,membrane coat,midbody,late endosome membrane,vesicle,extracellular exosome	sp	1	2	uniprot_mouse_proteome	>sp|Q9D8B3|CHM4B_MOUSE Charged multivesicular body protein 4b OS=Mus musculus GN=Chmp4b PE=1 SV=2	4	5
TRUE	Old_Decellularized / Young_Decellularized	Old_Decellularized	Young_Decellularized	10	P16294	5896.72	16746.1	1.50584	1.50584	183.99	2.8399	0	4.01876e-05	0.000109785	9	0.211875	P16294	FA9_MOUSE	Coagulation factor IX	F9	P16294	Mus musculus	proteolysis,blood coagulation,zymogen activation	endopeptidase activity,serine-type endopeptidase activity,calcium ion binding,peptidase activity	extracellular space,extracellular exosome	sp	2	3	uniprot_mouse_proteome	>sp|P16294|FA9_MOUSE Coagulation factor IX OS=Mus musculus GN=F9 PE=2 SV=3	2	2
TRUE	Old_Decellularized / Young_Decellularized	Old_Decellularized	Young_Decellularized	220	Q7TPV4	3.26284e+06	1.91538e+06	-0.768495	0.768495	-41.2971	0.587029	0	4.21141e-05	0.000114608	219	0.1198	Q7TPV4	MBB1A_MOUSE	Myb-binding protein 1A	Mybbp1a	Q7TPV4	Mus musculus	osteoblast differentiation,transcription, DNA-templated,nucleocytoplasmic transport,respiratory electron transport chain,circadian regulation of gene expression,cellular response to glucose starvation,negative regulation of transcription, DNA-templated,positive regulation of cell cycle arrest,DNA biosynthetic process,intrinsic apoptotic signaling pathway by p53 class mediator,positive regulation …	core promoter binding,transcription corepressor activity,RNA binding,DNA-directed DNA polymerase activity,protein binding,transcription factor binding,zinc ion binding,sequence-specific DNA binding	nucleus,nucleolus,cytoplasm,membrane,NLS-dependent protein nuclear import complex,intracellular membrane-bounded organelle	sp	1	2	uniprot_mouse_proteome	>sp|Q7TPV4|MBB1A_MOUSE Myb-binding protein 1A OS=Mus musculus GN=Mybbp1a PE=1 SV=2	33	44
TRUE	Old_Decellularized / Young_Decellularized	Old_Decellularized	Young_Decellularized	35	Q9CRY7	347872	224729	-0.630371	0.630371	-35.399	0.64601	0	4.28158e-05	0.000115855	34	0.146269	Q9CRY7	GDPD1_MOUSE	Glycerophosphodiester phosphodiesterase domain-containing protein 1	Gdpd1	Q9CRY7	Mus musculus	phospholipid metabolic process,glycerophospholipid catabolic process,N-acylethanolamine metabolic process	lysophospholipase activity,phosphoric diester hydrolase activity,metal ion binding,alkylglycerophosphoethanolamine phosphodiesterase activity	endoplasmic reticulum membrane,membrane,integral component of membrane,perinuclear region of cytoplasm	sp	1	1	uniprot_mouse_proteome	>sp|Q9CRY7|GDPD1_MOUSE Glycerophosphodiester phosphodiesterase domain-containing protein 1 OS=Mus musculus GN=Gdpd1 PE=1 SV=1	6	7
TRUE	Old_Decellularized / Young_Decellularized	Old_Decellularized	Young_Decellularized	10	Q9D8K3;Q9D8K3-2	70793.4	9291.45	-2.92964	2.92964	-86.8753	0.131247	0	5.10708e-05	0.000135366	9	0.400474	Q9D8K3;Q9D8K3-2	DERL3_MOUSE	Derlin-3;Isoform 2 of Derlin-3	Derl3	Q9D8K3;Q9D8K3-2	Mus musculus	protein N-linked glycosylation via asparagine,ER-associated ubiquitin-dependent protein catabolic process,endoplasmic reticulum unfolded protein response,negative regulation of retrograde protein transport, ER to cytosol;	;	integral component of endoplasmic reticulum membrane,signal recognition particle receptor complex,signal recognition particle;	sp	1;	1;	uniprot_mouse_proteome	>sp|Q9D8K3|DERL3_MOUSE Derlin-3 OS=Mus musculus GN=Derl3 PE=1 SV=1;>sp|Q9D8K3-2|DERL3_MOUSE Isoform 2 of Derlin-3 OS=Mus musculus GN=Derl3	2	2
TRUE	Old_Decellularized / Young_Decellularized	Old_Decellularized	Young_Decellularized	30	Q3TTY5	8374006	4.39864e+06	-0.928859	0.928859	-47.4726	0.525274	0	5.30245e-05	0.000139765	29	0.136752	Q3TTY5	K22E_MOUSE	Keratin, type II cytoskeletal 2 epidermal	Krt2	Q3TTY5	Mus musculus	keratinocyte development,epidermis development,peptide cross-linking,keratinization,keratinocyte activation,keratinocyte proliferation,intermediate filament organization,keratinocyte migration	structural molecule activity,cytoskeletal protein binding,structural constituent of epidermis	cornified envelope,nucleus,keratin filament,extracellular exosome	sp	1	1	uniprot_mouse_proteome	>sp|Q3TTY5|K22E_MOUSE Keratin, type II cytoskeletal 2 epidermal OS=Mus musculus GN=Krt2 PE=1 SV=1	4	6
TRUE	Old_Decellularized / Young_Decellularized	Old_Decellularized	Young_Decellularized	150	O35639	17549852	9334114	-0.910874	0.910874	-46.8137	0.531863	0	5.29762e-05	0.000139765	149	0.110168	O35639	ANXA3_MOUSE	Annexin A3	Anxa3	O35639	Mus musculus	phagocytosis,positive regulation of endothelial cell migration,hippocampus development,animal organ regeneration,defense response to bacterium,negative regulation of catalytic activity,neutrophil degranulation,positive regulation of angiogenesis,positive regulation of DNA metabolic process,positive regulation of sequence-specific DNA binding transcription factor activity,response to glucocorticoi…	calcium ion binding,calcium-dependent phospholipid binding,phospholipase A2 inhibitor activity,calcium-dependent protein binding	cytoplasm,cytosol,plasma membrane,membrane,axon,dendrite,phagocytic vesicle membrane,specific granule,neuronal cell body,extracellular exosome	sp	1	4	uniprot_mouse_proteome	>sp|O35639|ANXA3_MOUSE Annexin A3 OS=Mus musculus GN=Anxa3 PE=1 SV=4	21	30
TRUE	Old_Decellularized / Young_Decellularized	Old_Decellularized	Young_Decellularized	10	O89051	33630.7	58197.5	0.791181	0.791181	73.049	1.73049	0	5.58048e-05	0.000146552	9	0.120713	O89051	ITM2B_MOUSE	Integral membrane protein 2B	Itm2b	O89051	Mus musculus	nervous system development,negative regulation of amyloid precursor protein biosynthetic process	beta-amyloid binding,ATP binding	Golgi membrane,extracellular space,Golgi apparatus,plasma membrane,endosome membrane,membrane,Golgi-associated vesicle membrane,integral component of organelle membrane,intracellular membrane-bounded organelle,extracellular exosome	sp	1	1	uniprot_mouse_proteome	>sp|O89051|ITM2B_MOUSE Integral membrane protein 2B OS=Mus musculus GN=Itm2b PE=1 SV=1	2	2
TRUE	Old_Decellularized / Young_Decellularized	Old_Decellularized	Young_Decellularized	70	Q8C854;Q8C854-3	1.1153e+06	741609	-0.588705	0.588705	-33.506	0.66494	0	5.74007e-05	0.000149915	69	0.0948999	Q8C854;Q8C854-3	MYEF2_MOUSE	Myelin expression factor 2;Isoform 2 of Myelin expression factor 2	Myef2	Q8C854;Q8C854-3	Mus musculus	negative regulation of transcription from RNA polymerase II promoter,transcription, DNA-templated;	RNA polymerase II core promoter proximal region sequence-specific DNA binding,transcriptional repressor activity, RNA polymerase II core promoter proximal region sequence-specific binding,single-stranded DNA binding,RNA binding;	nucleus;	sp	1;	1;	uniprot_mouse_proteome	>sp|Q8C854|MYEF2_MOUSE Myelin expression factor 2 OS=Mus musculus GN=Myef2 PE=1 SV=1;>sp|Q8C854-3|MYEF2_MOUSE Isoform 2 of Myelin expression factor 2 OS=Mus musculus GN=Myef2	13	14
TRUE	Old_Decellularized / Young_Decellularized	Old_Decellularized	Young_Decellularized	20	Q9JM51	887429	530136	-0.743269	0.743269	-40.2616	0.597384	0	5.81645e-05	0.000151079	19	0.100685	Q9JM51	PTGES_MOUSE	Prostaglandin E synthase	Ptges	Q9JM51	Mus musculus	prostaglandin biosynthetic process,acute inflammatory response,chronic inflammatory response,prostaglandin metabolic process,negative regulation of cell proliferation,response to organic cyclic compound,response to lipopolysaccharide,response to retinoic acid,response to cytokine,response to calcium ion	prostaglandin-D synthase activity,glutathione binding,prostaglandin-E synthase activity	nuclear envelope lumen,cytoplasm,integral component of membrane,perinuclear region of cytoplasm	sp	1	1	uniprot_mouse_proteome	>sp|Q9JM51|PTGES_MOUSE Prostaglandin E synthase OS=Mus musculus GN=Ptges PE=1 SV=1	3	4
TRUE	Old_Decellularized / Young_Decellularized	Old_Decellularized	Young_Decellularized	70	Q91WT7	2.69232e+06	1.65292e+06	-0.703836	0.703836	-38.6062	0.613938	0	5.83065e-05	0.000151173	69	0.188101	Q91WT7	Q91WT7_MOUSE	3-alpha-hydroxysteroid dehydrogenase type 1	Akr1c14	Q91WT7	Mus musculus	hippocampus development,oxidation-reduction process	androsterone dehydrogenase activity	cellular_component	tr	1	1	uniprot_mouse_proteome	>tr|Q91WT7|Q91WT7_MOUSE 3-alpha-hydroxysteroid dehydrogenase type 1 OS=Mus musculus GN=Akr1c14 PE=1 SV=1	11	14
TRUE	Old_Decellularized / Young_Decellularized	Old_Decellularized	Young_Decellularized	60	P97310	496404	191527	-1.37396	1.37396	-61.417	0.38583	0	6.15955e-05	0.000157727	59	0.263808	P97310	MCM2_MOUSE	DNA replication licensing factor MCM2	Mcm2	P97310	Mus musculus	DNA unwinding involved in DNA replication,DNA replication initiation,nucleosome assembly,apoptotic process,cell cycle,cellular response to interleukin-4,cochlea development	DNA helicase activity,DNA replication origin binding,ATP binding,enzyme binding,histone binding,metal ion binding	nuclear chromosome, telomeric region,chromatin,nucleus,nucleoplasm,nuclear origin of replication recognition complex,cytoplasm,cytosol,microtubule cytoskeleton,MCM complex	sp	1	3	uniprot_mouse_proteome	>sp|P97310|MCM2_MOUSE DNA replication licensing factor MCM2 OS=Mus musculus GN=Mcm2 PE=1 SV=3	12	12
TRUE	Old_Decellularized / Young_Decellularized	Old_Decellularized	Young_Decellularized	25	P17047;P17047-2;P17047-3	840922	1.35769e+06	0.691113	0.691113	61.4529	1.61453	0	6.45541e-05	0.000164382	24	0.224531	P17047;P17047-2;P17047-3	LAMP2_MOUSE	Lysosome-associated membrane glycoprotein 2;Isoform LAMP-2B of Lysosome-associated membrane glycoprotein 2;Isoform LAMP-2C of Lysosome-associated membrane glycoprotein 2	Lamp2	P17047;P17047-2;P17047-3	Mus musculus	protein targeting,autophagy,cellular response to starvation,regulation of protein stability,negative regulation of protein homooligomerization,muscle cell cellular homeostasis,protein stabilization,chaperone-mediated autophagy,protein targeting to lysosome involved in chaperone-mediated autophagy,autophagosome maturation,lysosomal protein catabolic process;;	protein binding,enzyme binding,protein domain specific binding;;	extracellular space,lysosome,lysosomal membrane,late endosome,trans-Golgi network,plasma membrane,membrane,phagocytic vesicle membrane,platelet dense granule membrane,late endosome membrane,autolysosome,perinuclear region of cytoplasm,chaperone-mediated autophagy translocation complex,extracellular exosome,integral component of autophagosome membrane,lysosomal matrix;;	sp	1;;	2;;	uniprot_mouse_proteome	>sp|P17047|LAMP2_MOUSE Lysosome-associated membrane glycoprotein 2 OS=Mus musculus GN=Lamp2 PE=1 SV=2;>sp|P17047-2|LAMP2_MOUSE Isoform LAMP-2B of Lysosome-associated membrane glycoprotein 2 OS=Mus musculus GN=Lamp2;>sp|P17047-3|LAMP2_MOUSE Isoform LAMP-2C of Lysosome-associated membrane glycoprotein 2 OS=Mus musculus GN=Lamp2	5	5
TRUE	Old_Decellularized / Young_Decellularized	Old_Decellularized	Young_Decellularized	30	P49717	302255	141794	-1.09197	1.09197	-53.0881	0.469119	0	8.26856e-05	0.00020435	29	0.318363	P49717	MCM4_MOUSE	DNA replication licensing factor MCM4	Mcm4	P49717	Mus musculus	DNA unwinding involved in DNA replication,DNA replication initiation,cell cycle	single-stranded DNA binding,protein binding,ATP binding,DNA helicase activity,ATP-dependent DNA helicase activity	nuclear chromosome, telomeric region,nucleoplasm,membrane,MCM complex	sp	1	1	uniprot_mouse_proteome	>sp|P49717|MCM4_MOUSE DNA replication licensing factor MCM4 OS=Mus musculus GN=Mcm4 PE=1 SV=1	6	6
TRUE	Old_Decellularized / Young_Decellularized	Old_Decellularized	Young_Decellularized	45	Q9Z0R9	869433	556710	-0.643148	0.643148	-35.9686	0.640314	0	9.98704e-05	0.000241382	44	0.114579	Q9Z0R9	FADS2_MOUSE	Fatty acid desaturase 2	Fads2	Q9Z0R9	Mus musculus	unsaturated fatty acid biosynthetic process,oxidation-reduction process	stearoyl-CoA 9-desaturase activity	endoplasmic reticulum membrane,membrane,integral component of membrane	sp	1	1	uniprot_mouse_proteome	>sp|Q9Z0R9|FADS2_MOUSE Fatty acid desaturase 2 OS=Mus musculus GN=Fads2 PE=1 SV=1	7	9
TRUE	Old_Decellularized / Young_Decellularized	Old_Decellularized	Young_Decellularized	30	P06797	549409	1.01207e+06	0.881354	0.881354	84.2103	1.8421	0	0.000113248	0.000270053	29	0.277005	P06797	CATL1_MOUSE	Cathepsin L1	Ctsl	P06797	Mus musculus	proteolysis,cell communication,spermatogenesis,male gonad development,cellular response to starvation,response to glucose,multicellular organism aging,negative regulation of keratinocyte proliferation,response to organic cyclic compound,protein processing,protein autoprocessing,nerve development,hair follicle morphogenesis,response to gonadotropin,decidualization,autophagic cell death,response to…	aminopeptidase activity,cysteine-type endopeptidase activity,protein binding,cysteine-type carboxypeptidase activity,peptide binding,histone binding	extracellular space,nucleus,nucleolus,cytoplasm,lysosome,vacuole,microvillus,external side of plasma membrane,cytoplasmic vesicle,neuron projection,perikaryon,extracellular exosome,secretory granule,apical part of cell	sp	1	2	uniprot_mouse_proteome	>sp|P06797|CATL1_MOUSE Cathepsin L1 OS=Mus musculus GN=Ctsl PE=1 SV=2	4	6
TRUE	Old_Decellularized / Young_Decellularized	Old_Decellularized	Young_Decellularized	15	P54818	337563	179276	-0.912976	0.912976	-46.8912	0.531088	0	0.00011508	0.000272946	14	0.175949	P54818	GALC_MOUSE	Galactocerebrosidase	Galc	P54818	Mus musculus	galactosylceramide catabolic process	galactosylceramidase activity	mitochondrion,lysosome,extracellular exosome	sp	1	2	uniprot_mouse_proteome	>sp|P54818|GALC_MOUSE Galactocerebrosidase OS=Mus musculus GN=Galc PE=1 SV=2	3	3
TRUE	Old_Decellularized / Young_Decellularized	Old_Decellularized	Young_Decellularized	20	A0A140LIU4;P56392	225404	410331	0.864274	0.864274	82.0424	1.82042	0	0.000115418	0.000272946	19	0.203296	A0A140LIU4;P56392	A0A140LIU4_MOUSE;CX7A1_MOUSE	Cytochrome c oxidase subunit 7A1, mitochondrial;Cytochrome c oxidase subunit 7A1, mitochondrial	Cox7a1	A0A140LIU4;P56392	Mus musculus	;hydrogen ion transmembrane transport	;cytochrome-c oxidase activity	;mitochondrion,mitochondrial respiratory chain,integral component of membrane	tr;sp	1	1	uniprot_mouse_proteome	>tr|A0A140LIU4|A0A140LIU4_MOUSE Cytochrome c oxidase subunit 7A1, mitochondrial OS=Mus musculus GN=Cox7a1 PE=1 SV=1;>sp|P56392|CX7A1_MOUSE Cytochrome c oxidase subunit 7A1, mitochondrial OS=Mus musculus GN=Cox7a1 PE=1 SV=1	2	4
TRUE	Old_Decellularized / Young_Decellularized	Old_Decellularized	Young_Decellularized	10	Q8VEL2	37024.1	7819.62	-2.24329	2.24329	-78.8796	0.211204	0	0.000153055	0.000350894	9	0.368598	Q8VEL2	MTMRE_MOUSE	Myotubularin-related protein 14	Mtmr14	Q8VEL2	Mus musculus	peptidyl-tyrosine dephosphorylation	phosphatidylinositol-3-phosphatase activity,protein tyrosine phosphatase activity	ruffle,perinuclear region of cytoplasm	sp	1	2	uniprot_mouse_proteome	>sp|Q8VEL2|MTMRE_MOUSE Myotubularin-related protein 14 OS=Mus musculus GN=Mtmr14 PE=1 SV=2	2	2
TRUE	Old_Decellularized / Young_Decellularized	Old_Decellularized	Young_Decellularized	20	O88508;O88508-2	103716	49143.9	-1.07756	1.07756	-52.6171	0.473829	0	0.00015438	0.000353364	19	0.249528	O88508;O88508-2	DNM3A_MOUSE	DNA (cytosine-5)-methyltransferase 3A;Isoform 2 of DNA (cytosine-5)-methyltransferase 3A	Dnmt3a	O88508;O88508-2	Mus musculus	negative regulation of transcription from RNA polymerase II promoter,mitotic cell cycle,DNA methylation,methylation-dependent chromatin silencing,regulation of gene expression by genetic imprinting,transcription, DNA-templated,spermatogenesis,aging,response to toxic substance,response to ionizing radiation,response to lead ion,positive regulation of cell death,neuron differentiation,response to e…	DNA binding,chromatin binding,DNA (cytosine-5-)-methyltransferase activity,protein binding,methyltransferase activity,identical protein binding,metal ion binding,DNA (cytosine-5-)-methyltransferase activity, acting on CpN substrates;	chromosome, centromeric region,euchromatin,heterochromatin,XY body,nucleus,nucleoplasm,nuclear heterochromatin,cytoplasm,nuclear matrix;	sp	1;	2;	uniprot_mouse_proteome	>sp|O88508|DNM3A_MOUSE DNA (cytosine-5)-methyltransferase 3A OS=Mus musculus GN=Dnmt3a PE=1 SV=2;>sp|O88508-2|DNM3A_MOUSE Isoform 2 of DNA (cytosine-5)-methyltransferase 3A OS=Mus musculus GN=Dnmt3a	4	4
TRUE	Old_Decellularized / Young_Decellularized	Old_Decellularized	Young_Decellularized	10	Q9EQF6	136404	56984.1	-1.25926	1.25926	-58.2241	0.417759	0	0.000165767	0.000374619	9	0.200487	Q9EQF6	DPYL5_MOUSE	Dihydropyrimidinase-related protein 5	Dpysl5	Q9EQF6	Mus musculus	axon guidance	protein binding,microtubule binding,hydrolase activity, acting on carbon-nitrogen (but not peptide) bonds	cytoplasm,dendrite,neuronal cell body	sp	1	1	uniprot_mouse_proteome	>sp|Q9EQF6|DPYL5_MOUSE Dihydropyrimidinase-related protein 5 OS=Mus musculus GN=Dpysl5 PE=1 SV=1	2	2
TRUE	Old_Decellularized / Young_Decellularized	Old_Decellularized	Young_Decellularized	120	P49312;Q5EBP8	12047276	7.44777e+06	-0.693827	0.693827	-38.1788	0.618212	0	0.000166293	0.000375213	119	0.0927108	P49312;Q5EBP8	ROA1_MOUSE;Q5EBP8_MOUSE	Heterogeneous nuclear ribonucleoprotein A1	Hnrnpa1	P49312;Q5EBP8	Mus musculus	alternative mRNA splicing, via spliceosome,RNA splicing,mRNA transport,nuclear export,nuclear import,cellular response to sodium arsenite;	single-stranded DNA binding,miRNA binding;	nucleus,nucleoplasm,spliceosomal complex,cytoplasm,intracellular ribonucleoprotein complex;	sp;tr	1	2;1	uniprot_mouse_proteome	>sp|P49312|ROA1_MOUSE Heterogeneous nuclear ribonucleoprotein A1 OS=Mus musculus GN=Hnrnpa1 PE=1 SV=2;>tr|Q5EBP8|Q5EBP8_MOUSE Heterogeneous nuclear ribonucleoprotein A1 OS=Mus musculus GN=Hnrnpa1 PE=1 SV=1	12	24
TRUE	Old_Decellularized / Young_Decellularized	Old_Decellularized	Young_Decellularized	40	G3X9B1	300363	166837	-0.848271	0.848271	-44.455	0.55545	0	0.000168576	0.000379763	39	0.174624	G3X9B1	G3X9B1_MOUSE	HEAT repeat containing 1	Heatr1	G3X9B1	Mus musculus	maturation of SSU-rRNA from tricistronic rRNA transcript (SSU-rRNA, 5.8S rRNA, LSU-rRNA),positive regulation of transcription from RNA polymerase I promoter,positive regulation of rRNA processing	RNA binding,snoRNA binding	fibrillar center,nucleolus,mitochondrion,membrane,90S preribosome,small-subunit processome,t-UTP complex	tr	1	1	uniprot_mouse_proteome	>tr|G3X9B1|G3X9B1_MOUSE HEAT repeat containing 1 OS=Mus musculus GN=Heatr1 PE=1 SV=1	8	8
TRUE	Old_Decellularized / Young_Decellularized	Old_Decellularized	Young_Decellularized	30	A0A0A0MQM7;O08746;O08746-2	90837.2	153837	0.760051	0.760051	69.355	1.69355	0	0.000188702	0.000419795	29	0.276248	A0A0A0MQM7;O08746;O08746-2	A0A0A0MQM7_MOUSE;MATN2_MOUSE;MATN2_MOUSE	Matrilin-2;Matrilin-2;Isoform 2 of Matrilin-2	Matn2	A0A0A0MQM7;O08746;O08746-2	Mus musculus	;neuron migration,axon guidance,glial cell migration,dendrite regeneration,neuron projection development,response to axon injury;	;calcium ion binding;	;proteinaceous extracellular matrix,basement membrane,extracellular space,extracellular matrix;	tr;sp;sp	1;2;	1;2;	uniprot_mouse_proteome	>tr|A0A0A0MQM7|A0A0A0MQM7_MOUSE Matrilin-2 OS=Mus musculus GN=Matn2 PE=1 SV=1;>sp|O08746|MATN2_MOUSE Matrilin-2 OS=Mus musculus GN=Matn2 PE=2 SV=2;>sp|O08746-2|MATN2_MOUSE Isoform 2 of Matrilin-2 OS=Mus musculus GN=Matn2	6	6
TRUE	Old_Decellularized / Young_Decellularized	Old_Decellularized	Young_Decellularized	30	P99028	915292	1.46604e+06	0.679622	0.679622	60.172	1.60172	0	0.000190366	0.000422179	29	0.226141	P99028	QCR6_MOUSE	Cytochrome b-c1 complex subunit 6, mitochondrial	Uqcrh	P99028	Mus musculus	mitochondrial electron transport, ubiquinol to cytochrome c,aerobic respiration,protein heterooligomerization,hydrogen ion transmembrane transport	protein complex binding,ubiquinol-cytochrome-c reductase activity	mitochondrion,mitochondrial inner membrane,mitochondrial respiratory chain complex III	sp	1	2	uniprot_mouse_proteome	>sp|P99028|QCR6_MOUSE Cytochrome b-c1 complex subunit 6, mitochondrial OS=Mus musculus GN=Uqcrh PE=1 SV=2	4	6
TRUE	Old_Decellularized / Young_Decellularized	Old_Decellularized	Young_Decellularized	10	Q9D0L1	50127.7	14132.1	-1.82664	1.82664	-71.8079	0.281921	0	0.000193148	0.00042648	9	0.314958	Q9D0L1	ZBED3_MOUSE	Zinc finger BED domain-containing protein 3	Zbed3	Q9D0L1	Mus musculus	negative regulation of protein phosphorylation,Wnt signaling pathway,positive regulation of transcription from RNA polymerase II promoter,protein stabilization,positive regulation of canonical Wnt signaling pathway,positive regulation of protein targeting to mitochondrion	DNA binding,protein binding,metal ion binding	cytosol,membrane	sp	1	1	uniprot_mouse_proteome	>sp|Q9D0L1|ZBED3_MOUSE Zinc finger BED domain-containing protein 3 OS=Mus musculus GN=Zbed3 PE=1 SV=1	2	2
TRUE	Old_Decellularized / Young_Decellularized	Old_Decellularized	Young_Decellularized	20	E9Q8I7	132459	88319.9	-0.58474	0.58474	-33.3231	0.666769	0	0.00019338	0.00042648	19	0.107602	E9Q8I7	E9Q8I7_MOUSE	Protein Nfxl1	Nfxl1	E9Q8I7	Mus musculus	negative regulation of transcription from RNA polymerase II promoter,transcription from RNA polymerase II promoter	RNA polymerase II regulatory region sequence-specific DNA binding,transcriptional repressor activity, RNA polymerase II core promoter proximal region sequence-specific binding,zinc ion binding	nucleus,membrane,integral component of membrane	tr	1	1	uniprot_mouse_proteome	>tr|E9Q8I7|E9Q8I7_MOUSE Protein Nfxl1 OS=Mus musculus GN=Nfxl1 PE=1 SV=1	4	4
TRUE	Old_Decellularized / Young_Decellularized	Old_Decellularized	Young_Decellularized	10	Q62009;Q62009-2;Q62009-3;Q62009-4;Q62009-5	57061.9	96383	0.756252	0.756252	68.9096	1.6891	0	0.000199553	0.000438258	9	0.136709	Q62009;Q62009-2;Q62009-3;Q62009-4;Q62009-5	POSTN_MOUSE	Periostin;Isoform 2 of Periostin;Isoform 3 of Periostin;Isoform 4 of Periostin;Isoform 5 of Periostin	Postn	Q62009;Q62009-2;Q62009-3;Q62009-4;Q62009-5	Mus musculus	response to hypoxia,negative regulation of cell-matrix adhesion,regulation of systemic arterial blood pressure,cell adhesion,regulation of Notch signaling pathway,response to mechanical stimulus,tissue development,response to muscle activity,positive regulation of smooth muscle cell migration,extracellular matrix organization,response to estradiol,cellular response to fibroblast growth factor sti…	heparin binding,metal ion binding;;;;	proteinaceous extracellular matrix,extracellular space,trans-Golgi network,extracellular matrix,neuromuscular junction;;;;	sp	1;;;;	2;;;;	uniprot_mouse_proteome	>sp|Q62009|POSTN_MOUSE Periostin OS=Mus musculus GN=Postn PE=1 SV=2;>sp|Q62009-2|POSTN_MOUSE Isoform 2 of Periostin OS=Mus musculus GN=Postn;>sp|Q62009-3|POSTN_MOUSE Isoform 3 of Periostin OS=Mus musculus GN=Postn;>sp|Q62009-4|POSTN_MOUSE Isoform 4 of Periostin OS=Mus musculus GN=Postn;>sp|Q62009-5|POSTN_MOUSE Isoform 5 of Periostin OS=Mus musculus GN=Postn	2	2
TRUE	Old_Decellularized / Young_Decellularized	Old_Decellularized	Young_Decellularized	20	Q99KG5;Q99KG5-2;Q99KG5-3	75205.1	142672	0.923801	0.923801	89.7107	1.89711	0	0.000204539	0.000448037	19	0.276302	Q99KG5;Q99KG5-2;Q99KG5-3	LSR_MOUSE	Lipolysis-stimulated lipoprotein receptor;Isoform 2 of Lipolysis-stimulated lipoprotein receptor;Isoform 3 of Lipolysis-stimulated lipoprotein receptor	Lsr	Q99KG5;Q99KG5-2;Q99KG5-3	Mus musculus	liver development,receptor-mediated endocytosis,regulation of lipid metabolic process,low-density lipoprotein particle clearance,very-low-density lipoprotein particle clearance,lipoprotein transport,establishment of blood-brain barrier,Requires Ontology,tricellular tight junction assembly;;	protein binding,low-density lipoprotein particle binding,lipoprotein particle receptor activity;;	plasma membrane,integral component of membrane,very-low-density lipoprotein particle,low-density lipoprotein particle,chylomicron,tricellular tight junction,extracellular exosome;;	sp	1;;	1;;	uniprot_mouse_proteome	>sp|Q99KG5|LSR_MOUSE Lipolysis-stimulated lipoprotein receptor OS=Mus musculus GN=Lsr PE=1 SV=1;>sp|Q99KG5-2|LSR_MOUSE Isoform 2 of Lipolysis-stimulated lipoprotein receptor OS=Mus musculus GN=Lsr;>sp|Q99KG5-3|LSR_MOUSE Isoform 3 of Lipolysis-stimulated lipoprotein receptor OS=Mus musculus GN=Lsr	4	4
TRUE	Old_Decellularized / Young_Decellularized	Old_Decellularized	Young_Decellularized	25	Q9D708	72383.2	125523	0.794227	0.794227	73.4148	1.73415	0	0.000213152	0.000464763	24	0.285672	Q9D708	Q9D708_MOUSE	Protein S100a16	S100a16	Q9D708	Mus musculus	response to calcium ion	RNA binding,calcium ion binding,protein homodimerization activity	extracellular space,nucleus,nucleolus,cytoplasm,cytosol,plasma membrane,extracellular exosome	tr	1	1	uniprot_mouse_proteome	>tr|Q9D708|Q9D708_MOUSE Protein S100a16 OS=Mus musculus GN=S100a16 PE=1 SV=1	3	5
TRUE	Old_Decellularized / Young_Decellularized	Old_Decellularized	Young_Decellularized	20	F8VPR1;Q8BVA4	222928	119886	-0.894911	0.894911	-46.222	0.53778	0	0.000219218	0.000475454	19	0.186092	F8VPR1;Q8BVA4	F8VPR1_MOUSE;LMOD1_MOUSE	Leiomodin-1	Lmod1	F8VPR1;Q8BVA4	Mus musculus	;muscle contraction,actin filament organization,myofibril assembly,positive regulation of actin filament polymerization,actin nucleation,pointed-end actin filament capping	;actin binding,tropomyosin binding	;cytosol,striated muscle thin filament,actin filament,myofibril,sarcomere	tr;sp	1	1	uniprot_mouse_proteome	>tr|F8VPR1|F8VPR1_MOUSE Leiomodin-1 OS=Mus musculus GN=Lmod1 PE=1 SV=1;>sp|Q8BVA4|LMOD1_MOUSE Leiomodin-1 OS=Mus musculus GN=Lmod1 PE=1 SV=1	4	4
TRUE	Old_Decellularized / Young_Decellularized	Old_Decellularized	Young_Decellularized	15	A2AUE1;G5E8T0;P60904	48321.3	84838.8	0.812064	0.812064	75.5722	1.75572	0	0.000222737	0.000481247	14	0.199617	A2AUE1;G5E8T0;P60904	A2AUE1_MOUSE;G5E8T0_MOUSE;DNJC5_MOUSE	DnaJ homolog subfamily C member 5 (Fragment);DnaJ (Hsp40) homolog, subfamily C, member 5, isoform CRA_b;DnaJ homolog subfamily C member 5	Dnajc5	A2AUE1;G5E8T0;P60904	Mus musculus	;;negative regulation of neuron apoptotic process	;;protein binding,ATP-dependent protein binding	;;mitochondrion,lysosomal membrane,plasma membrane,synaptic vesicle,membrane,melanosome,terminal bouton,extracellular exosome	tr;tr;sp	1	1	uniprot_mouse_proteome	>tr|A2AUE1|A2AUE1_MOUSE DnaJ homolog subfamily C member 5 (Fragment) OS=Mus musculus GN=Dnajc5 PE=1 SV=1;>tr|G5E8T0|G5E8T0_MOUSE DnaJ (Hsp40) homolog, subfamily C, member 5, isoform CRA_b OS=Mus musculus GN=Dnajc5 PE=1 SV=1;>sp|P60904|DNJC5_MOUSE DnaJ homolog subfamily C member 5 OS=Mus musculus GN=Dnajc5 PE=1 SV=1	2	3
TRUE	Old_Decellularized / Young_Decellularized	Old_Decellularized	Young_Decellularized	20	Q8CG48	207187	116008	-0.836706	0.836706	-44.0079	0.559921	0	0.000240705	0.000513755	19	0.272462	Q8CG48	SMC2_MOUSE	Structural maintenance of chromosomes protein 2	Smc2	Q8CG48	Mus musculus	mitotic chromosome condensation,meiotic chromosome condensation,meiotic chromosome segregation,cell division,kinetochore organization	protein binding,ATP binding,protein heterodimerization activity	nuclear chromosome,condensed chromosome,condensin complex,nucleus,nucleolus,cytoplasm,extracellular exosome	sp	1	2	uniprot_mouse_proteome	>sp|Q8CG48|SMC2_MOUSE Structural maintenance of chromosomes protein 2 OS=Mus musculus GN=Smc2 PE=1 SV=2	4	4
TRUE	Old_Decellularized / Young_Decellularized	Old_Decellularized	Young_Decellularized	50	Q9CRT8	366242	235274	-0.638454	0.638454	-35.7599	0.642401	0	0.000253704	0.000537566	49	0.16186	Q9CRT8	XPOT_MOUSE	Exportin-T	Xpot	Q9CRT8	Mus musculus	tRNA export from nucleus,tRNA re-export from nucleus	tRNA binding,Ran GTPase binding	nuclear pore,nucleoplasm,cytoplasm,cytosol,nuclear matrix	sp	1	3	uniprot_mouse_proteome	>sp|Q9CRT8|XPOT_MOUSE Exportin-T OS=Mus musculus GN=Xpot PE=1 SV=3	9	10
TRUE	Old_Decellularized / Young_Decellularized	Old_Decellularized	Young_Decellularized	25	Q8R5L1	130006	213970	0.718828	0.718828	64.5844	1.64584	0	0.00026685	0.000557141	24	0.2225	Q8R5L1	Q8R5L1_MOUSE	Complement component 1 Q subcomponent-binding protein, mitochondrial	C1qbp	Q8R5L1	Mus musculus				tr	1	1	uniprot_mouse_proteome	>tr|Q8R5L1|Q8R5L1_MOUSE Complement component 1 Q subcomponent-binding protein, mitochondrial OS=Mus musculus GN=C1qbp PE=1 SV=1	3	5
TRUE	Old_Decellularized / Young_Decellularized	Old_Decellularized	Young_Decellularized	15	A0A075B5P4;A0A0A6YWR2	69523.5	281161	2.01582	2.01582	304.412	4.04412	0	0.00029023	0.000599808	14	0.541119	A0A075B5P4;A0A0A6YWR2	A0A075B5P4_MOUSE;A0A0A6YWR2_MOUSE	Ig gamma-1 chain C region secreted form (Fragment)	Ighg1	A0A075B5P4;A0A0A6YWR2	Mus musculus	;	;	;	tr	1	1	uniprot_mouse_proteome	>tr|A0A075B5P4|A0A075B5P4_MOUSE Ig gamma-1 chain C region secreted form (Fragment) OS=Mus musculus GN=Ighg1 PE=1 SV=1;>tr|A0A0A6YWR2|A0A0A6YWR2_MOUSE Ig gamma-1 chain C region secreted form (Fragment) OS=Mus musculus GN=Ighg1 PE=1 SV=1	3	3
TRUE	Old_Decellularized / Young_Decellularized	Old_Decellularized	Young_Decellularized	20	Q9JMG7;Q9JMG7-2	168146	291518	0.793874	0.793874	73.3724	1.73372	0	0.000292382	0.00060251	19	0.249306	Q9JMG7;Q9JMG7-2	HDGR3_MOUSE	Hepatoma-derived growth factor-related protein 3;Isoform 2 of Hepatoma-derived growth factor-related protein 3	Hdgfrp3	Q9JMG7;Q9JMG7-2	Mus musculus	negative regulation of microtubule depolymerization,cell proliferation,regulation of receptor activity,neuron projection development,microtubule polymerization;	chromatin binding,protein binding,microtubule binding,growth factor activity,tubulin binding;	extracellular region,nucleus,nucleoplasm,cytoplasm,cytosol;	sp	1;	2;	uniprot_mouse_proteome	>sp|Q9JMG7|HDGR3_MOUSE Hepatoma-derived growth factor-related protein 3 OS=Mus musculus GN=Hdgfrp3 PE=1 SV=2;>sp|Q9JMG7-2|HDGR3_MOUSE Isoform 2 of Hepatoma-derived growth factor-related protein 3 OS=Mus musculus GN=Hdgfrp3	3	4
TRUE	Old_Decellularized / Young_Decellularized	Old_Decellularized	Young_Decellularized	10	Q61245;Q61245-2	530769	272382	-0.962452	0.962452	-48.6816	0.513184	0	0.000307767	0.000627863	9	0.168209	Q61245;Q61245-2	COBA1_MOUSE	Collagen alpha-1(XI) chain;Isoform Short of Collagen alpha-1(XI) chain	Col11a1	Q61245;Q61245-2	Mus musculus	cartilage condensation,ossification,chondrocyte development,heart morphogenesis,proteoglycan metabolic process,visual perception,sensory perception of sound,collagen fibril organization,endodermal cell differentiation,tendon development,inner ear morphogenesis,embryonic skeletal system morphogenesis,skeletal system morphogenesis,detection of mechanical stimulus involved in sensory perception of s…	molecular_function,extracellular matrix structural constituent,metal ion binding;	proteinaceous extracellular matrix,collagen trimer,collagen type XI trimer,extracellular space;	sp	1;	2;	uniprot_mouse_proteome	>sp|Q61245|COBA1_MOUSE Collagen alpha-1(XI) chain OS=Mus musculus GN=Col11a1 PE=1 SV=2;>sp|Q61245-2|COBA1_MOUSE Isoform Short of Collagen alpha-1(XI) chain OS=Mus musculus GN=Col11a1	2	2
TRUE	Old_Decellularized / Young_Decellularized	Old_Decellularized	Young_Decellularized	25	P61924	626886	336529	-0.897472	0.897472	-46.3173	0.536827	0	0.000309426	0.000630345	24	0.237931	P61924	COPZ1_MOUSE	Coatomer subunit zeta-1	Copz1	P61924	Mus musculus	intracellular protein transport,intra-Golgi vesicle-mediated transport,toxin transport	molecular_function	Golgi membrane,COPI vesicle coat	sp	1	1	uniprot_mouse_proteome	>sp|P61924|COPZ1_MOUSE Coatomer subunit zeta-1 OS=Mus musculus GN=Copz1 PE=1 SV=1	4	5
TRUE	Old_Decellularized / Young_Decellularized	Old_Decellularized	Young_Decellularized	15	Q9R013	122475	198142	0.694048	0.694048	61.7816	1.61782	0	0.000341822	0.000689446	14	0.15818	Q9R013	CATF_MOUSE	Cathepsin F	Ctsf	Q9R013	Mus musculus	proteolysis involved in cellular protein catabolic process	cysteine-type endopeptidase activity,cysteine-type peptidase activity	extracellular space,lysosome,extracellular exosome,extracellular vesicle	sp	1	1	uniprot_mouse_proteome	>sp|Q9R013|CATF_MOUSE Cathepsin F OS=Mus musculus GN=Ctsf PE=1 SV=1	3	3
TRUE	Old_Decellularized / Young_Decellularized	Old_Decellularized	Young_Decellularized	30	A0A0A6YY53;F6TQW2	191243	718515	1.90961	1.90961	275.707	3.75707	0	0.000408655	0.000799372	29	0.352265	A0A0A6YY53;F6TQW2	A0A0A6YY53_MOUSE;F6TQW2_MOUSE	Protein Ighg2c (Fragment);Protein Ighg2c	Ighg2c	A0A0A6YY53;F6TQW2	Mus musculus	;humoral immune response mediated by circulating immunoglobulin,phagocytosis, recognition,phagocytosis, engulfment,complement activation, classical pathway,immunoglobulin mediated immune response,antibacterial humoral response,defense response to bacterium,innate immune response,B cell receptor signaling pathway,positive regulation of B cell activation	;antigen binding,immunoglobulin receptor binding	;extracellular space,external side of plasma membrane,integral component of membrane,immunoglobulin complex, circulating,blood microparticle	tr	1	1	uniprot_mouse_proteome	>tr|A0A0A6YY53|A0A0A6YY53_MOUSE Protein Ighg2c (Fragment) OS=Mus musculus GN=Ighg2c PE=1 SV=1;>tr|F6TQW2|F6TQW2_MOUSE Protein Ighg2c OS=Mus musculus GN=Ighg2c PE=1 SV=1	5	6
TRUE	Old_Decellularized / Young_Decellularized	Old_Decellularized	Young_Decellularized	25	A0A0A0MQ90;P97352	547020	879133	0.684489	0.684489	60.7132	1.60713	0	0.0004082	0.000799372	24	0.263502	A0A0A0MQ90;P97352	A0A0A0MQ90_MOUSE;S10AD_MOUSE	Protein S100-A13	S100a13	A0A0A0MQ90;P97352	Mus musculus	;positive regulation of I-kappaB kinase/NF-kappaB signaling,cytokine secretion,interleukin-1 alpha secretion	;copper ion binding,calcium ion binding,zinc ion binding,lipid binding,fibroblast growth factor binding,protein homodimerization activity,RAGE receptor binding	;extracellular space,nucleus,nucleolus,cytoplasm,cytosol,plasma membrane,perinuclear region of cytoplasm,extracellular exosome	tr;sp	1	1	uniprot_mouse_proteome	>tr|A0A0A0MQ90|A0A0A0MQ90_MOUSE Protein S100-A13 OS=Mus musculus GN=S100a13 PE=1 SV=1;>sp|P97352|S10AD_MOUSE Protein S100-A13 OS=Mus musculus GN=S100a13 PE=1 SV=1	4	5
TRUE	Old_Decellularized / Young_Decellularized	Old_Decellularized	Young_Decellularized	20	A0A075B5P2;P01837	187141	598533	1.6773	1.6773	219.829	3.19829	0	0.000440052	0.000854924	19	0.423985	A0A075B5P2;P01837	A0A075B5P2_MOUSE;IGKC_MOUSE	Protein Igkc (Fragment);Ig kappa chain C region	Igkc;	A0A075B5P2;P01837	Mus musculus	;phagocytosis, recognition,phagocytosis, engulfment,complement activation, classical pathway,B cell differentiation,defense response to bacterium,innate immune response,B cell receptor signaling pathway,positive regulation of B cell activation	;antigen binding,immunoglobulin receptor binding	;plasma membrane,external side of plasma membrane,immunoglobulin complex, circulating,blood microparticle	tr;sp	1	1	uniprot_mouse_proteome	>tr|A0A075B5P2|A0A075B5P2_MOUSE Protein Igkc (Fragment) OS=Mus musculus GN=Igkc PE=1 SV=1;>sp|P01837|IGKC_MOUSE Ig kappa chain C region OS=Mus musculus PE=1 SV=1	3	4
TRUE	Old_Decellularized / Young_Decellularized	Old_Decellularized	Young_Decellularized	25	D3Z2M7;P18872	447169	274627	-0.703346	0.703346	-38.5854	0.614146	0	0.000448318	0.000868616	24	0.128518	D3Z2M7;P18872	D3Z2M7_MOUSE;GNAO_MOUSE	Guanine nucleotide-binding protein G(o) subunit alpha (Fragment);Guanine nucleotide-binding protein G(o) subunit alpha	Gnao1	D3Z2M7;P18872	Mus musculus	;G-protein coupled receptor signaling pathway,adenylate cyclase-modulating G-protein coupled receptor signaling pathway,dopamine receptor signaling pathway,aging,locomotory behavior,regulation of heart contraction,cellular process,forebrain development,neuron projection development,response to cytokine,response to drug,response to hydrogen peroxide,response to morphine,positive regulation of GTPa…	;GTPase activity,signal transducer activity,protein binding,GTP binding,G-protein beta/gamma-subunit complex binding,G-protein coupled serotonin receptor binding,mu-type opioid receptor binding,GTPase activating protein binding,metal ion binding,corticotropin-releasing hormone receptor 1 binding	;heterotrimeric G-protein complex,plasma membrane,membrane,dendrite,myelin sheath,cell body	tr;sp	1	1;3	uniprot_mouse_proteome	>tr|D3Z2M7|D3Z2M7_MOUSE Guanine nucleotide-binding protein G(o) subunit alpha (Fragment) OS=Mus musculus GN=Gnao1 PE=1 SV=1;>sp|P18872|GNAO_MOUSE Guanine nucleotide-binding protein G(o) subunit alpha OS=Mus musculus GN=Gnao1 PE=1 SV=3	5	5
TRUE	Old_Decellularized / Young_Decellularized	Old_Decellularized	Young_Decellularized	130	O08553	4.11321e+06	2.65674e+06	-0.630607	0.630607	-35.4096	0.645904	0	0.000460703	0.000887788	129	0.0922328	O08553	DPYL2_MOUSE	Dihydropyrimidinase-related protein 2	Dpysl2	O08553	Mus musculus	response to amphetamine,endocytosis,cytoskeleton organization,axon guidance,regulation of neuron projection development,positive regulation of glutamate secretion,spinal cord development,olfactory bulb development,regulation of axon extension,response to cocaine,response to drug,synaptic vesicle transport	protein binding,microtubule binding,hydrolase activity, acting on carbon-nitrogen (but not peptide) bonds,protein kinase binding,identical protein binding	mitochondrion,cytosol,plasma membrane,axon,dendrite,growth cone,neuronal cell body,terminal bouton,myelin sheath,protein complex,extracellular exosome,microtubule,membrane	sp	1	2	uniprot_mouse_proteome	>sp|O08553|DPYL2_MOUSE Dihydropyrimidinase-related protein 2 OS=Mus musculus GN=Dpysl2 PE=1 SV=2	18	26
TRUE	Old_Decellularized / Young_Decellularized	Old_Decellularized	Young_Decellularized	10	O54825	62575.6	31672.5	-0.982367	0.982367	-49.3851	0.506149	0	0.00046501	0.000893671	9	0.173976	O54825	BYST_MOUSE	Bystin	Bysl	O54825	Mus musculus	maturation of SSU-rRNA from tricistronic rRNA transcript (SSU-rRNA, 5.8S rRNA, LSU-rRNA),in utero embryonic development,blastocyst formation,trophectodermal cell differentiation,cell adhesion,cell proliferation	RNA binding	nucleus,nucleolus,cytoplasm,membrane,intracellular membrane-bounded organelle,apical part of cell	sp	1	3	uniprot_mouse_proteome	>sp|O54825|BYST_MOUSE Bystin OS=Mus musculus GN=Bysl PE=1 SV=3	2	2
TRUE	Old_Decellularized / Young_Decellularized	Old_Decellularized	Young_Decellularized	30	Q62000	392405	635943	0.696553	0.696553	62.0628	1.62063	0	0.000491896	0.000944069	29	0.403402	Q62000	MIME_MOUSE	Mimecan	Ogn	Q62000	Mus musculus	axonogenesis,regulation of receptor activity	growth factor activity	proteinaceous extracellular matrix,extracellular space,extracellular matrix,extracellular exosome,extracellular vesicle	sp	1	1	uniprot_mouse_proteome	>sp|Q62000|MIME_MOUSE Mimecan OS=Mus musculus GN=Ogn PE=1 SV=1	6	6
TRUE	Old_Decellularized / Young_Decellularized	Old_Decellularized	Young_Decellularized	30	Q922Q4	355825	229732	-0.631215	0.631215	-35.4368	0.645632	0	0.000516636	0.000982791	29	0.117005	Q922Q4	P5CR2_MOUSE	Pyrroline-5-carboxylate reductase 2	Pycr2	Q922Q4	Mus musculus	proline biosynthetic process,cellular response to oxidative stress,oxidation-reduction process,L-proline biosynthetic process	pyrroline-5-carboxylate reductase activity	mitochondrion	sp	1	1	uniprot_mouse_proteome	>sp|Q922Q4|P5CR2_MOUSE Pyrroline-5-carboxylate reductase 2 OS=Mus musculus GN=Pycr2 PE=1 SV=1	5	6
TRUE	Old_Decellularized / Young_Decellularized	Old_Decellularized	Young_Decellularized	10	Q61559;Q6PKB0	63547	99757.1	0.650596	0.650596	56.9816	1.56982	0	0.000559171	0.00105334	9	0.139299	Q61559;Q6PKB0	FCGRN_MOUSE;Q6PKB0_MOUSE	IgG receptor FcRn large subunit p51;Fcgrt protein	Fcgrt	Q61559;Q6PKB0	Mus musculus	Fc-gamma receptor signaling pathway;	IgG receptor activity,IgG binding,beta-2-microglobulin binding,peptide antigen binding;	plasma membrane,integral component of membrane;	sp;tr	1	1	uniprot_mouse_proteome	>sp|Q61559|FCGRN_MOUSE IgG receptor FcRn large subunit p51 OS=Mus musculus GN=Fcgrt PE=1 SV=1;>tr|Q6PKB0|Q6PKB0_MOUSE Fcgrt protein OS=Mus musculus GN=Fcgrt PE=1 SV=1	2	2
TRUE	Old_Decellularized / Young_Decellularized	Old_Decellularized	Young_Decellularized	70	P58242	2.44685e+06	1.58726e+06	-0.624387	0.624387	-35.1305	0.648695	0	0.00058514	0.00109646	69	0.185999	P58242	ASM3B_MOUSE	Acid sphingomyelinase-like phosphodiesterase 3b	Smpdl3b	P58242	Mus musculus	sphingomyelin catabolic process,inflammatory response,negative regulation of toll-like receptor signaling pathway,innate immune response,negative regulation of innate immune response,membrane lipid catabolic process,negative regulation of inflammatory response	sphingomyelin phosphodiesterase activity,protein binding,phosphoric diester hydrolase activity,hydrolase activity, acting on glycosyl bonds,metal ion binding	extracellular space,plasma membrane,anchored component of membrane,extracellular exosome	sp	1	1	uniprot_mouse_proteome	>sp|P58242|ASM3B_MOUSE Acid sphingomyelinase-like phosphodiesterase 3b OS=Mus musculus GN=Smpdl3b PE=1 SV=1	11	14
TRUE	Old_Decellularized / Young_Decellularized	Old_Decellularized	Young_Decellularized	10	Q64674	217960	128523	-0.762039	0.762039	-41.0337	0.589663	0	0.000594512	0.00111111	9	0.13684	Q64674	SPEE_MOUSE	Spermidine synthase	Srm	Q64674	Mus musculus	spermidine biosynthetic process,cellular response to leukemia inhibitory factor	spermidine synthase activity,identical protein binding,protein homodimerization activity		sp	1	1	uniprot_mouse_proteome	>sp|Q64674|SPEE_MOUSE Spermidine synthase OS=Mus musculus GN=Srm PE=1 SV=1	2	2
TRUE	Old_Decellularized / Young_Decellularized	Old_Decellularized	Young_Decellularized	70	E9QJW0;Q91VS7	17979738	29038384	0.691589	0.691589	61.5062	1.61506	0	0.000620764	0.00115112	69	0.252495	E9QJW0;Q91VS7	E9QJW0_MOUSE;MGST1_MOUSE	Microsomal glutathione S-transferase 1	Mgst1	E9QJW0;Q91VS7	Mus musculus	;glutathione metabolic process,oxidation-reduction process,protein homotrimerization,cellular response to lipid hydroperoxide,cellular oxidant detoxification	;glutathione transferase activity,glutathione peroxidase activity	;mitochondrion,mitochondrial outer membrane,mitochondrial inner membrane,endoplasmic reticulum,endoplasmic reticulum membrane,integral component of membrane	tr;sp	1	1;3	uniprot_mouse_proteome	>tr|E9QJW0|E9QJW0_MOUSE Microsomal glutathione S-transferase 1 OS=Mus musculus GN=Mgst1 PE=1 SV=1;>sp|Q91VS7|MGST1_MOUSE Microsomal glutathione S-transferase 1 OS=Mus musculus GN=Mgst1 PE=1 SV=3	5	14
TRUE	Old_Decellularized / Young_Decellularized	Old_Decellularized	Young_Decellularized	10	Q920Q8;Q920Q8-3;Q920Q8-4	217678	130141	-0.742121	0.742121	-40.214	0.59786	0	0.0006288	0.00116424	9	0.159002	Q920Q8;Q920Q8-3;Q920Q8-4	NS1BP_MOUSE	Influenza virus NS1A-binding protein homolog;Isoform 3 of Influenza virus NS1A-binding protein homolog;Isoform 4 of Influenza virus NS1A-binding protein homolog	Ivns1abp	Q920Q8;Q920Q8-3;Q920Q8-4	Mus musculus	negative regulation of intrinsic apoptotic signaling pathway;;	protein binding;;	nucleus,cytosol,actin cytoskeleton;;	sp	1;;	2;;	uniprot_mouse_proteome	>sp|Q920Q8|NS1BP_MOUSE Influenza virus NS1A-binding protein homolog OS=Mus musculus GN=Ivns1abp PE=1 SV=2;>sp|Q920Q8-3|NS1BP_MOUSE Isoform 3 of Influenza virus NS1A-binding protein homolog OS=Mus musculus GN=Ivns1abp;>sp|Q920Q8-4|NS1BP_MOUSE Isoform 4 of Influenza virus NS1A-binding protein homolog OS=Mus musculus GN=Ivns1abp	2	2
TRUE	Old_Decellularized / Young_Decellularized	Old_Decellularized	Young_Decellularized	80	Q3UHK6;Q3UHK6-2;Q3UHK6-3;Q3UHK6-4	325040	197447	-0.719155	0.719155	-39.2547	0.607453	0	0.000629476	0.00116424	79	0.137604	Q3UHK6;Q3UHK6-2;Q3UHK6-3;Q3UHK6-4	TEN4_MOUSE	Teneurin-4;Isoform 2 of Teneurin-4;Isoform 3 of Teneurin-4;Isoform 4 of Teneurin-4	Tenm4	Q3UHK6;Q3UHK6-2;Q3UHK6-3;Q3UHK6-4	Mus musculus	cell morphogenesis,gastrulation with mouth forming second,heterophilic cell-cell adhesion via plasma membrane cell adhesion molecules,signal transduction,regulation of myelination,positive regulation of myelination,central nervous system myelin formation,neuron development,positive regulation of oligodendrocyte differentiation,cardiac muscle cell proliferation,cardiac cell fate specification,self…	protein homodimerization activity,protein heterodimerization activity,cell adhesion molecule binding;;;	nucleus,cytoplasm,plasma membrane,integral component of plasma membrane,neuron projection;;;	sp	1;;;	2;;;	uniprot_mouse_proteome	>sp|Q3UHK6|TEN4_MOUSE Teneurin-4 OS=Mus musculus GN=Tenm4 PE=1 SV=2;>sp|Q3UHK6-2|TEN4_MOUSE Isoform 2 of Teneurin-4 OS=Mus musculus GN=Tenm4;>sp|Q3UHK6-3|TEN4_MOUSE Isoform 3 of Teneurin-4 OS=Mus musculus GN=Tenm4;>sp|Q3UHK6-4|TEN4_MOUSE Isoform 4 of Teneurin-4 OS=Mus musculus GN=Tenm4	16	16
TRUE	Old_Decellularized / Young_Decellularized	Old_Decellularized	Young_Decellularized	30	Q6IFZ6	9006887	5.52071e+06	-0.706176	0.706176	-38.7057	0.612943	0	0.000669582	0.00123522	29	0.174323	Q6IFZ6	K2C1B_MOUSE	Keratin, type II cytoskeletal 1b	Krt77	Q6IFZ6	Mus musculus		structural molecule activity	cytoskeleton,keratin filament,extracellular exosome	sp	1	1	uniprot_mouse_proteome	>sp|Q6IFZ6|K2C1B_MOUSE Keratin, type II cytoskeletal 1b OS=Mus musculus GN=Krt77 PE=1 SV=1	5	6
TRUE	Old_Decellularized / Young_Decellularized	Old_Decellularized	Young_Decellularized	10	Q8BH43	49925.8	78182.5	0.647061	0.647061	56.5975	1.56597	0	0.000687681	0.00126533	9	0.123652	Q8BH43	WASF2_MOUSE	Wiskott-Aldrich syndrome protein family member 2	Wasf2	Q8BH43	Mus musculus	angiogenesis,ameboidal-type cell migration,endocytosis,positive regulation of lamellipodium assembly,Rac protein signal transduction,lamellipodium assembly,actin cytoskeleton organization,actin filament-based movement,megakaryocyte development,negative regulation of stress fiber assembly,lamellipodium morphogenesis	actin binding,protein binding,SH3 domain binding,protein complex binding,cadherin binding,protein kinase A binding	ruffle,intracellular,early endosome,cytoskeleton,cell-cell junction,lamellipodium,SCAR complex,protein complex,extracellular exosome	sp	1	1	uniprot_mouse_proteome	>sp|Q8BH43|WASF2_MOUSE Wiskott-Aldrich syndrome protein family member 2 OS=Mus musculus GN=Wasf2 PE=1 SV=1	2	2
TRUE	Old_Decellularized / Young_Decellularized	Old_Decellularized	Young_Decellularized	50	Q62465	1.61565e+06	2.73231e+06	0.758006	0.758006	69.1151	1.69115	0	0.000699042	0.00127963	49	0.3323	Q62465	VAT1_MOUSE	Synaptic vesicle membrane protein VAT-1 homolog	Vat1	Q62465	Mus musculus	negative regulation of mitochondrial fusion,oxidation-reduction process	zinc ion binding,oxidoreductase activity	mitochondrial outer membrane,extracellular exosome	sp	1	3	uniprot_mouse_proteome	>sp|Q62465|VAT1_MOUSE Synaptic vesicle membrane protein VAT-1 homolog OS=Mus musculus GN=Vat1 PE=1 SV=3	9	10
TRUE	Old_Decellularized / Young_Decellularized	Old_Decellularized	Young_Decellularized	10	A0A075B5K8;A0A0B4J1I0;A0A140T8M0;A0A140T8N1;F6XWB2;P01631	48832.6	188082	1.94545	1.94545	285.157	3.85157	0	0.000760088	0.00137201	9	0.373595	A0A075B5K8;A0A0B4J1I0;A0A140T8M0;A0A140T8N1;F6XWB2;P01631	A0A075B5K8_MOUSE;A0A0B4J1I0_MOUSE;A0A140T8M0_MOUSE;A0A140T8N1_MOUSE;F6XWB2_MOUSE;KV2A7_MOUSE	Protein Igkv1-99;Protein Igkv1-110 (Fragment);Protein Igkv1-117 (Fragment);Protein Igkv1-88 (Fragment);Protein Igkv1-99 (Fragment);Ig kappa chain V-II region 26-10	Igkv1-99;Igkv1-110;Igkv1-117;Igkv1-88;Igkv1-99;	A0A075B5K8;A0A0B4J1I0;A0A140T8M0;A0A140T8N1;F6XWB2;P01631	Mus musculus	;immunoglobulin production,immune response;;;immunoglobulin production,immune response;	;;;;;antigen binding	;extracellular space;;;extracellular space;	tr;tr;tr;tr;tr;sp	4;4;4;4;4;1	7;5;2;2;5;1	uniprot_mouse_proteome	>tr|A0A075B5K8|A0A075B5K8_MOUSE Protein Igkv1-99 OS=Mus musculus GN=Igkv1-99 PE=4 SV=7;>tr|A0A0B4J1I0|A0A0B4J1I0_MOUSE Protein Igkv1-110 (Fragment) OS=Mus musculus GN=Igkv1-110 PE=4 SV=5;>tr|A0A140T8M0|A0A140T8M0_MOUSE Protein Igkv1-117 (Fragment) OS=Mus musculus GN=Igkv1-117 PE=4 SV=2;>tr|A0A140T8N1|A0A140T8N1_MOUSE Protein Igkv1-88 (Fragment) OS=Mus musculus GN=Igkv1-88 PE=4 SV=2;>tr|F6XWB2|F6X…	2	2
TRUE	Old_Decellularized / Young_Decellularized	Old_Decellularized	Young_Decellularized	15	J3QK52;Q8BHX6;Q9WV70	71053.8	40037.3	-0.827567	0.827567	-43.6521	0.563479	0	0.000763006	0.00137553	14	0.187523	J3QK52;Q8BHX6;Q9WV70	J3QK52_MOUSE;Q8BHX6_MOUSE;NOC2L_MOUSE	Nucleolar complex protein 2 homolog	Noc2l	J3QK52;Q8BHX6;Q9WV70	Mus musculus	;;negative regulation of transcription from RNA polymerase II promoter,negative regulation of B cell apoptotic process,transcription, DNA-templated,apoptotic process,chromatin assembly,cellular response to UV,negative regulation of histone acetylation,ribosomal large subunit biogenesis,negative regulation of intrinsic apoptotic signaling pathway	;;p53 binding,chromatin binding,transcription corepressor activity,RNA binding,nucleosome binding,nucleosomal histone binding,histone binding,repressing transcription factor binding	;;nucleus,nucleoplasm,nucleolus,cytosol,Noc1p-Noc2p complex,Noc2p-Noc3p complex	tr;tr;sp	1	1;1;2	uniprot_mouse_proteome	>tr|J3QK52|J3QK52_MOUSE Nucleolar complex protein 2 homolog OS=Mus musculus GN=Noc2l PE=1 SV=1;>tr|Q8BHX6|Q8BHX6_MOUSE Nucleolar complex protein 2 homolog OS=Mus musculus GN=Noc2l PE=1 SV=1;>sp|Q9WV70|NOC2L_MOUSE Nucleolar complex protein 2 homolog OS=Mus musculus GN=Noc2l PE=1 SV=2	3	3
TRUE	Old_Decellularized / Young_Decellularized	Old_Decellularized	Young_Decellularized	30	Q8R404	149736	229132	0.613762	0.613762	53.0244	1.53024	0	0.000779151	0.00139933	29	0.449112	Q8R404	MIC13_MOUSE	MICOS complex subunit MIC13	Mic13	Q8R404	Mus musculus	cristae formation	molecular_function	nucleoplasm,mitochondrion,mitochondrial inner membrane,mitochondrial crista junction,MICOS complex	sp	1	1	uniprot_mouse_proteome	>sp|Q8R404|MIC13_MOUSE MICOS complex subunit MIC13 OS=Mus musculus GN=Mic13 PE=1 SV=1	3	6
TRUE	Old_Decellularized / Young_Decellularized	Old_Decellularized	Young_Decellularized	10	D3Z795;D6RG59;Q9JK23	32727	18327.7	-0.836458	0.836458	-43.9983	0.560017	0	0.000792334	0.00141588	9	0.163144	D3Z795;D6RG59;Q9JK23	D3Z795_MOUSE;D6RG59_MOUSE;PSMG1_MOUSE	Proteasome assembly chaperone 1	Psmg1	D3Z795;D6RG59;Q9JK23	Mus musculus	;;cerebellar granule cell precursor proliferation,proteasome assembly,proteasome core complex assembly	;;proteasome binding	;;nucleus,nucleoplasm,cytoplasm,endoplasmic reticulum,Golgi apparatus,cytosol	tr;tr;sp	1	1	uniprot_mouse_proteome	>tr|D3Z795|D3Z795_MOUSE Proteasome assembly chaperone 1 OS=Mus musculus GN=Psmg1 PE=1 SV=1;>tr|D6RG59|D6RG59_MOUSE Proteasome assembly chaperone 1 OS=Mus musculus GN=Psmg1 PE=1 SV=1;>sp|Q9JK23|PSMG1_MOUSE Proteasome assembly chaperone 1 OS=Mus musculus GN=Psmg1 PE=1 SV=1	2	2
TRUE	Old_Decellularized / Young_Decellularized	Old_Decellularized	Young_Decellularized	15	Q99JB8	46259.9	86143.3	0.896974	0.896974	86.2156	1.86216	0	0.000936964	0.0016394	14	0.250115	Q99JB8	PACN3_MOUSE	Protein kinase C and casein kinase II substrate protein 3	Pacsin3	Q99JB8	Mus musculus	endocytosis,negative regulation of endocytosis,positive regulation of membrane protein ectodomain proteolysis,negative regulation of calcium ion transport,regulation of molecular function,membrane tubulation	protein binding,cytoskeletal protein binding,lipid binding,calcium channel inhibitor activity	cytoplasm,endosome,cytosol,plasma membrane,extracellular exosome,trans-Golgi network	sp	1	1	uniprot_mouse_proteome	>sp|Q99JB8|PACN3_MOUSE Protein kinase C and casein kinase II substrate protein 3 OS=Mus musculus GN=Pacsin3 PE=1 SV=1	3	3
TRUE	Old_Decellularized / Young_Decellularized	Old_Decellularized	Young_Decellularized	15	A0A0R4J104;E0CXT5;E9PX84;E9QL31;P98078;P98078-2;P98078-3;Q3TRE6;Q9DCE6	170104	104902	-0.697373	0.697373	-38.3306	0.616694	0	0.00103873	0.00178676	14	0.189343	A0A0R4J104;E0CXT5;E9PX84;E9QL31;P98078;P98078-2;P98078-3;Q3TRE6;Q9DCE6	A0A0R4J104_MOUSE;E0CXT5_MOUSE;E9PX84_MOUSE;E9QL31_MOUSE;DAB2_MOUSE;DAB2_MOUSE;DAB2_MOUSE;Q3TRE6_MOUSE;Q9DCE6_MOUSE	Disabled homolog 2;Disabled homolog 2;Disabled homolog 2;Disabled homolog 2;Disabled homolog 2;Isoform p93 of Disabled homolog 2;Isoform p67 of Disabled homolog 2;Disabled homolog 2;Disabled homolog 2	Dab2	A0A0R4J104;E0CXT5;E9PX84;E9QL31;P98078;P98078-2;P98078-3;Q3TRE6;Q9DCE6	Mus musculus	;;;;cell morphogenesis involved in differentiation,in utero embryonic development,positive regulation of receptor recycling,positive regulation of protein phosphorylation,positive regulation of receptor internalization,receptor-mediated endocytosis,pinocytosis,apoptotic process,activation of JUN kinase activity,endoderm development,excretion,positive regulation of epithelial to mesenchymal transi…	;;;;integrin binding,protein binding,phosphatidylinositol-4,5-bisphosphate binding,protein C-terminus binding,clathrin binding,phosphatidylinositol binding,AP-2 adaptor complex binding,clathrin adaptor activity,cargo receptor activity,SMAD binding;;;;	;;;;fibrillar center,nucleus,nucleolus,cytoplasm,plasma membrane,clathrin-coated pit,focal adhesion,apical plasma membrane,clathrin coat of coated pit,clathrin-coated vesicle,clathrin-coated vesicle membrane,intracellular membrane-bounded organelle,extracellular exosome,transforming growth factor beta receptor homodimeric complex;;;;	tr;tr;tr;tr;sp;sp;sp;tr;tr	1;1;1;1;1;;;1;1	1;1;1;1;2;;;1;1	uniprot_mouse_proteome	>tr|A0A0R4J104|A0A0R4J104_MOUSE Disabled homolog 2 OS=Mus musculus GN=Dab2 PE=1 SV=1;>tr|E0CXT5|E0CXT5_MOUSE Disabled homolog 2 OS=Mus musculus GN=Dab2 PE=1 SV=1;>tr|E9PX84|E9PX84_MOUSE Disabled homolog 2 OS=Mus musculus GN=Dab2 PE=1 SV=1;>tr|E9QL31|E9QL31_MOUSE Disabled homolog 2 OS=Mus musculus GN=Dab2 PE=1 SV=1;>sp|P98078|DAB2_MOUSE Disabled homolog 2 OS=Mus musculus GN=Dab2 PE=1 SV=2;>sp|P980…	3	3
TRUE	Old_Decellularized / Young_Decellularized	Old_Decellularized	Young_Decellularized	10	P03930	662709	1.13659e+06	0.778268	0.778268	71.507	1.71507	0	0.00107025	0.00183215	9	0.160163	P03930	ATP8_MOUSE	ATP synthase protein 8	Mtatp8	P03930	Mus musculus	ATP synthesis coupled proton transport,response to hyperoxia	hydrogen ion transmembrane transporter activity,ATPase activity	mitochondrial proton-transporting ATP synthase complex, coupling factor F(o),mitochondrion,mitochondrial proton-transporting ATP synthase complex,integral component of membrane	sp	1	1	uniprot_mouse_proteome	>sp|P03930|ATP8_MOUSE ATP synthase protein 8 OS=Mus musculus GN=Mtatp8 PE=1 SV=1	2	2
TRUE	Old_Decellularized / Young_Decellularized	Old_Decellularized	Young_Decellularized	10	P00920	101957	46301.9	-1.13881	1.13881	-54.5867	0.454133	0	0.00107365	0.00183356	9	0.279649	P00920	CAH2_MOUSE	Carbonic anhydrase 2	Ca2	P00920	Mus musculus	kidney development,morphogenesis of an epithelium,one-carbon metabolic process,regulation of pH,response to pH,response to zinc ion,carbon dioxide transport,positive regulation of synaptic transmission, GABAergic,positive regulation of cellular pH reduction,angiotensin-activated signaling pathway,odontogenesis of dentin-containing tooth,response to estrogen,regulation of anion transport,positive …	arylesterase activity,carbonate dehydratase activity,zinc ion binding	cytoplasm,cytosol,plasma membrane,microvillus,basolateral plasma membrane,axon,myelin sheath,apical part of cell,extracellular exosome	sp	1	4	uniprot_mouse_proteome	>sp|P00920|CAH2_MOUSE Carbonic anhydrase 2 OS=Mus musculus GN=Ca2 PE=1 SV=4	2	2
TRUE	Old_Decellularized / Young_Decellularized	Old_Decellularized	Young_Decellularized	10	Q80ZM5	415774	263554	-0.657699	0.657699	-36.6112	0.633888	0	0.00109274	0.0018617	9	0.125609	Q80ZM5	Q80ZM5_MOUSE	H1 histone family, member X	H1fx	Q80ZM5	Mus musculus	nucleosome assembly	DNA binding,RNA binding,protein binding,cadherin binding	nucleosome,nucleus,nucleolus	tr	1	1	uniprot_mouse_proteome	>tr|Q80ZM5|Q80ZM5_MOUSE H1 histone family, member X OS=Mus musculus GN=H1fx PE=1 SV=1	2	2
TRUE	Old_Decellularized / Young_Decellularized	Old_Decellularized	Young_Decellularized	20	P01887	226580	383408	0.758856	0.758856	69.2148	1.69215	0	0.00109523	0.00186373	19	0.333724	P01887	B2MG_MOUSE	Beta-2-microglobulin	B2m	P01887	Mus musculus	retina homeostasis,positive regulation of T cell mediated cytotoxicity,response to molecule of bacterial origin,antigen processing and presentation of exogenous protein antigen via MHC class Ib, TAP-dependent,positive regulation of T cell cytokine production,iron ion transport,immune response,cellular defense response,negative regulation of neuron projection development,antigen processing and pre…	protein binding,identical protein binding	extracellular space,Golgi apparatus,cytosol,plasma membrane,focal adhesion,external side of plasma membrane,membrane,phagocytic vesicle membrane,MHC class I protein complex,extracellular exosome,HFE-transferrin receptor complex	sp	1	2	uniprot_mouse_proteome	>sp|P01887|B2MG_MOUSE Beta-2-microglobulin OS=Mus musculus GN=B2m PE=1 SV=2	2	4
TRUE	Old_Decellularized / Young_Decellularized	Old_Decellularized	Young_Decellularized	15	Q9CR51	49986.1	97970.4	0.970819	0.970819	95.9953	1.95995	0	0.00111204	0.00188783	14	0.348783	Q9CR51	VATG1_MOUSE	V-type proton ATPase subunit G 1	Atp6v1g1	Q9CR51	Mus musculus	cellular iron ion homeostasis,cellular response to increased oxygen levels,hydrogen ion transmembrane transport	protein binding,hydrogen-exporting ATPase activity, phosphorylative mechanism,ATPase activity,ATPase binding	intracellular,lysosomal membrane,cytosol,plasma membrane,vacuolar proton-transporting V-type ATPase complex,extracellular exosome,synaptic vesicle	sp	1	3	uniprot_mouse_proteome	>sp|Q9CR51|VATG1_MOUSE V-type proton ATPase subunit G 1 OS=Mus musculus GN=Atp6v1g1 PE=1 SV=3	2	3
TRUE	Old_Decellularized / Young_Decellularized	Old_Decellularized	Young_Decellularized	10	Q9CR86	617159	388567	-0.667478	0.667478	-37.0393	0.629607	0	0.00115651	0.00195633	9	0.12913	Q9CR86	CHSP1_MOUSE	Calcium-regulated heat stable protein 1	Carhsp1	Q9CR86	Mus musculus	regulation of transcription, DNA-templated,regulation of mRNA stability	DNA binding,mRNA 3'-UTR binding,protein binding	cytoplasmic mRNA processing body,cytosol,P granule,extracellular exosome,cytoplasmic exosome (RNase complex)	sp	1	1	uniprot_mouse_proteome	>sp|Q9CR86|CHSP1_MOUSE Calcium-regulated heat stable protein 1 OS=Mus musculus GN=Carhsp1 PE=1 SV=1	2	2
TRUE	Old_Decellularized / Young_Decellularized	Old_Decellularized	Young_Decellularized	50	Q922U2	1.09861e+06	687522	-0.676198	0.676198	-37.4188	0.625812	0	0.00121511	0.00203612	49	0.205072	Q922U2	K2C5_MOUSE	Keratin, type II cytoskeletal 5	Krt5	Q922U2	Mus musculus		structural molecule activity,protein binding,scaffold protein binding	nucleus,cytoplasm,mitochondrion,intermediate filament,plasma membrane,membrane,keratin filament,extracellular exosome	sp	1	1	uniprot_mouse_proteome	>sp|Q922U2|K2C5_MOUSE Keratin, type II cytoskeletal 5 OS=Mus musculus GN=Krt5 PE=1 SV=1	8	10
TRUE	Old_Decellularized / Young_Decellularized	Old_Decellularized	Young_Decellularized	10	A0A087WQ32;A0A087WS03;G3X9F1;Q9R1S3;Q9R1S3-2;Q9R1S3-3	59289.6	26032.8	-1.18745	1.18745	-56.0921	0.439079	0	0.00123904	0.00206648	9	0.234179	A0A087WQ32;A0A087WS03;G3X9F1;Q9R1S3;Q9R1S3-2;Q9R1S3-3	A0A087WQ32_MOUSE;A0A087WS03_MOUSE;G3X9F1_MOUSE;PIGN_MOUSE;PIGN_MOUSE;PIGN_MOUSE	GPI ethanolamine phosphate transferase 1;GPI ethanolamine phosphate transferase 1;GPI ethanolamine phosphate transferase 1;GPI ethanolamine phosphate transferase 1;Isoform 2 of GPI ethanolamine phosphate transferase 1;Isoform 3 of GPI ethanolamine phosphate transferase 1	Pign	A0A087WQ32;A0A087WS03;G3X9F1;Q9R1S3;Q9R1S3-2;Q9R1S3-3	Mus musculus	;;;GPI anchor biosynthetic process;;	;;;phosphotransferase activity, for other substituted phosphate groups,mannose-ethanolamine phosphotransferase activity;;	;;;endoplasmic reticulum membrane,cytosol,plasma membrane,membrane,integral component of membrane;;	tr;tr;tr;sp;sp;sp	1;1;1;2;;	1;1;1;2;;	uniprot_mouse_proteome	>tr|A0A087WQ32|A0A087WQ32_MOUSE GPI ethanolamine phosphate transferase 1 OS=Mus musculus GN=Pign PE=1 SV=1;>tr|A0A087WS03|A0A087WS03_MOUSE GPI ethanolamine phosphate transferase 1 OS=Mus musculus GN=Pign PE=1 SV=1;>tr|G3X9F1|G3X9F1_MOUSE GPI ethanolamine phosphate transferase 1 OS=Mus musculus GN=Pign PE=1 SV=1;>sp|Q9R1S3|PIGN_MOUSE GPI ethanolamine phosphate transferase 1 OS=Mus musculus GN=Pign…	2	2
TRUE	Old_Decellularized / Young_Decellularized	Old_Decellularized	Young_Decellularized	10	A0A0R4J1C8;P31996;P31996-2	416580	824765	0.985389	0.985389	97.9847	1.97985	0	0.00123914	0.00206648	9	0.216135	A0A0R4J1C8;P31996;P31996-2	A0A0R4J1C8_MOUSE;CD68_MOUSE;CD68_MOUSE	Macrosialin;Macrosialin;Isoform Short of Macrosialin	Cd68	A0A0R4J1C8;P31996;P31996-2	Mus musculus	;cellular response to organic substance;	;;	;lysosomal membrane,plasma membrane,endosome membrane,integral component of membrane;	tr;sp;sp	1;1;	1;1;	uniprot_mouse_proteome	>tr|A0A0R4J1C8|A0A0R4J1C8_MOUSE Macrosialin OS=Mus musculus GN=Cd68 PE=1 SV=1;>sp|P31996|CD68_MOUSE Macrosialin OS=Mus musculus GN=Cd68 PE=1 SV=1;>sp|P31996-2|CD68_MOUSE Isoform Short of Macrosialin OS=Mus musculus GN=Cd68	2	2
TRUE	Old_Decellularized / Young_Decellularized	Old_Decellularized	Young_Decellularized	10	Q9DCN1	38971	76336.8	0.969977	0.969977	95.8809	1.95881	0	0.00124725	0.00207271	9	0.253338	Q9DCN1	NUD12_MOUSE	Peroxisomal NADH pyrophosphatase NUDT12	Nudt12	Q9DCN1	Mus musculus	NADP catabolic process,NAD catabolic process	NAD+ diphosphatase activity,NADH pyrophosphatase activity,metal ion binding	nucleus,cytoplasm,peroxisome	sp	1	1	uniprot_mouse_proteome	>sp|Q9DCN1|NUD12_MOUSE Peroxisomal NADH pyrophosphatase NUDT12 OS=Mus musculus GN=Nudt12 PE=1 SV=1	2	2
TRUE	Old_Decellularized / Young_Decellularized	Old_Decellularized	Young_Decellularized	10	Q8K363	125225	78854.9	-0.667249	0.667249	-37.0294	0.629706	0	0.00125744	0.00208501	9	0.139334	Q8K363	DDX18_MOUSE	ATP-dependent RNA helicase DDX18	Ddx18	Q8K363	Mus musculus	RNA secondary structure unwinding,cellular response to estradiol stimulus	RNA binding,ATP-dependent RNA helicase activity,ATP binding	chromosome,nucleolus,cytoplasm,membrane	sp	1	1	uniprot_mouse_proteome	>sp|Q8K363|DDX18_MOUSE ATP-dependent RNA helicase DDX18 OS=Mus musculus GN=Ddx18 PE=1 SV=1	2	2
TRUE	Old_Decellularized / Young_Decellularized	Old_Decellularized	Young_Decellularized	50	P15089	292529	867937	1.56901	1.56901	196.701	2.96701	0	0.00129153	0.0021341	49	0.696481	P15089	CBPA3_MOUSE	Mast cell carboxypeptidase A	Cpa3	P15089	Mus musculus	regulation of angiotensin levels in blood,proteolysis	metallocarboxypeptidase activity,peptidase activity,zinc ion binding	extracellular space,transport vesicle,extracellular matrix	sp	2	1	uniprot_mouse_proteome	>sp|P15089|CBPA3_MOUSE Mast cell carboxypeptidase A OS=Mus musculus GN=Cpa3 PE=2 SV=1	9	10
TRUE	Old_Decellularized / Young_Decellularized	Old_Decellularized	Young_Decellularized	10	Q8C788;Q91ZR2	120884	74485.3	-0.6986	0.6986	-38.383	0.61617	0	0.0013251	0.00218199	9	0.135562	Q8C788;Q91ZR2	Q8C788_MOUSE;SNX18_MOUSE	Sorting nexin;Sorting nexin-18	Snx18	Q8C788;Q91ZR2	Mus musculus	;mitotic cytokinesis,endocytosis,protein transport,endosomal transport,cleavage furrow formation,positive regulation of GTPase activity	;protein binding,phosphatidylinositol-4,5-bisphosphate binding,phosphatidylinositol binding	;endosome membrane,growth cone,cytoplasmic vesicle membrane,extrinsic component of cytoplasmic side of plasma membrane,cytoplasmic vesicle,neuronal cell body,extracellular exosome,clathrin-coated vesicle	tr;sp	1	1	uniprot_mouse_proteome	>tr|Q8C788|Q8C788_MOUSE Sorting nexin OS=Mus musculus GN=Snx18 PE=1 SV=1;>sp|Q91ZR2|SNX18_MOUSE Sorting nexin-18 OS=Mus musculus GN=Snx18 PE=1 SV=1	2	2
TRUE	Old_Decellularized / Young_Decellularized	Old_Decellularized	Young_Decellularized	80	Q61009	6755601	10463956	0.631272	0.631272	54.893	1.54893	0	0.00132507	0.00218199	79	0.219029	Q61009	SCRB1_MOUSE	Scavenger receptor class B member 1	Scarb1	Q61009	Mus musculus	endothelial cell proliferation,androgen biosynthetic process,cholesterol catabolic process,receptor-mediated endocytosis,positive regulation of triglyceride biosynthetic process,positive regulation of cholesterol storage,regulation of phosphatidylcholine catabolic process,phospholipid transport,lipopolysaccharide transport,cholesterol transport,lipopolysaccharide-mediated signaling pathway,detect…	lipopolysaccharide binding,beta-amyloid binding,phosphatidylserine binding,lipopolysaccharide receptor activity,high-density lipoprotein particle binding,low-density lipoprotein particle binding,apolipoprotein binding,apolipoprotein A-I binding,protein homodimerization activity,high-density lipoprotein particle receptor activity	cytoplasm,lysosomal membrane,plasma membrane,integral component of plasma membrane,caveola,cell surface,integral component of membrane,microvillus membrane,intracellular membrane-bounded organelle,extracellular exosome	sp	1	1	uniprot_mouse_proteome	>sp|Q61009|SCRB1_MOUSE Scavenger receptor class B member 1 OS=Mus musculus GN=Scarb1 PE=1 SV=1	10	16
TRUE	Old_Decellularized / Young_Decellularized	Old_Decellularized	Young_Decellularized	135	Q8C196	805961	375460	-1.10205	1.10205	-53.4146	0.465854	0	0.00134639	0.00221193	134	0.240756	Q8C196	CPSM_MOUSE	Carbamoyl-phosphate synthase [ammonia], mitochondrial	Cps1	Q8C196	Mus musculus	urea cycle,'de novo' pyrimidine nucleobase biosynthetic process,proteolysis,arginine biosynthetic process,glutamine metabolic process,midgut development,response to toxic substance,response to zinc ion,response to amine,triglyceride catabolic process,response to food,response to lipopolysaccharide,vasodilation,response to drug,response to starvation,response to amino acid,cellular response to fib…	carbamoyl-phosphate synthase (ammonia) activity,carbamoyl-phosphate synthase (glutamine-hydrolyzing) activity,endopeptidase activity,calcium ion binding,protein binding,ATP binding,phospholipid binding,glutamate binding,protein complex binding,modified amino acid binding	nucleolus,mitochondrion,mitochondrial inner membrane,mitochondrial nucleoid,protein complex	sp	1	2	uniprot_mouse_proteome	>sp|Q8C196|CPSM_MOUSE Carbamoyl-phosphate synthase [ammonia], mitochondrial OS=Mus musculus GN=Cps1 PE=1 SV=2	26	27
TRUE	Old_Decellularized / Young_Decellularized	Old_Decellularized	Young_Decellularized	45	Q9EP75	1.76113e+06	3.04194e+06	0.788493	0.788493	72.7269	1.72727	0	0.00137391	0.00225006	44	0.316086	Q9EP75	CP4FE_MOUSE	Leukotriene-B4 omega-hydroxylase 3	Cyp4f14	Q9EP75	Mus musculus	leukotriene B4 catabolic process,oxidation-reduction process	iron ion binding,heme binding,leukotriene-B4 20-monooxygenase activity,alpha-tocopherol omega-hydroxylase activity	endoplasmic reticulum membrane,organelle membrane	sp	1	1	uniprot_mouse_proteome	>sp|Q9EP75|CP4FE_MOUSE Leukotriene-B4 omega-hydroxylase 3 OS=Mus musculus GN=Cyp4f14 PE=1 SV=1	7	9
TRUE	Old_Decellularized / Young_Decellularized	Old_Decellularized	Young_Decellularized	15	Q792Z1	6307802	3720035	-0.761821	0.761821	-41.0249	0.589751	0	0.00140256	0.00228577	14	0.162291	Q792Z1	Q792Z1_MOUSE	MCG140784	Try10	Q792Z1	Mus musculus	proteolysis,digestion	serine-type endopeptidase activity	extracellular space,extracellular exosome,blood microparticle	tr	1	1	uniprot_mouse_proteome	>tr|Q792Z1|Q792Z1_MOUSE MCG140784 OS=Mus musculus GN=Try10 PE=1 SV=1	2	3
TRUE	Old_Decellularized / Young_Decellularized	Old_Decellularized	Young_Decellularized	15	Q3UV17	5423226	3.18434e+06	-0.768158	0.768158	-41.2833	0.587167	0	0.00152711	0.00245785	14	0.145611	Q3UV17	K22O_MOUSE	Keratin, type II cytoskeletal 2 oral	Krt76	Q3UV17	Mus musculus	epidermis development,pigmentation,sebaceous gland development	molecular_function,structural molecule activity	nucleus,keratin filament,extracellular exosome	sp	1	1	uniprot_mouse_proteome	>sp|Q3UV17|K22O_MOUSE Keratin, type II cytoskeletal 2 oral OS=Mus musculus GN=Krt76 PE=1 SV=1	2	3
TRUE	Old_Decellularized / Young_Decellularized	Old_Decellularized	Young_Decellularized	15	B2RPU8;D3Z5B1;Q9D1L0	441198	672856	0.608871	0.608871	52.5065	1.52506	0	0.00155635	0.00249438	14	0.230546	B2RPU8;D3Z5B1;Q9D1L0	B2RPU8_MOUSE;D3Z5B1_MOUSE;CHCH2_MOUSE	MCG130675;Protein Zbed5 (Fragment);Coiled-coil-helix-coiled-coil-helix domain-containing protein 2	Zbed5;Zbed5;Chchd2	B2RPU8;D3Z5B1;Q9D1L0	Mus musculus	regulation of transcription from RNA polymerase II promoter,biological_process;;transcription, DNA-templated,mitochondrion organization,positive regulation of transcription from RNA polymerase II promoter,regulation of cellular response to hypoxia	RNA polymerase II transcription factor activity, sequence-specific DNA binding,DNA binding;;transcription factor binding,sequence-specific DNA binding	nucleoplasm,mitochondrion;;nucleus,mitochondrion,mitochondrial intermembrane space	tr;tr;sp	2;4;2	1;8;1	uniprot_mouse_proteome	>tr|B2RPU8|B2RPU8_MOUSE MCG130675 OS=Mus musculus GN=Zbed5 PE=2 SV=1;>tr|D3Z5B1|D3Z5B1_MOUSE Protein Zbed5 (Fragment) OS=Mus musculus GN=Zbed5 PE=4 SV=8;>sp|Q9D1L0|CHCH2_MOUSE Coiled-coil-helix-coiled-coil-helix domain-containing protein 2 OS=Mus musculus GN=Chchd2 PE=2 SV=1	3	3
TRUE	Old_Decellularized / Young_Decellularized	Old_Decellularized	Young_Decellularized	25	Q9DCZ4;Q9DCZ4-2;Q9DCZ4-3	856942	1.29669e+06	0.597562	0.597562	51.3158	1.51316	0	0.0016062	0.00255916	24	0.328149	Q9DCZ4;Q9DCZ4-2;Q9DCZ4-3	MIC26_MOUSE	MICOS complex subunit Mic26;Isoform 2 of MICOS complex subunit Mic26;Isoform 3 of MICOS complex subunit Mic26	Apoo	Q9DCZ4;Q9DCZ4-2;Q9DCZ4-3	Mus musculus	cristae formation;;	molecular_function;;	Golgi membrane,extracellular region,mitochondrion,endoplasmic reticulum membrane,cytosol,integral component of mitochondrial inner membrane,MICOS complex;;	sp	1;;	2;;	uniprot_mouse_proteome	>sp|Q9DCZ4|MIC26_MOUSE MICOS complex subunit Mic26 OS=Mus musculus GN=Apoo PE=1 SV=2;>sp|Q9DCZ4-2|MIC26_MOUSE Isoform 2 of MICOS complex subunit Mic26 OS=Mus musculus GN=Apoo;>sp|Q9DCZ4-3|MIC26_MOUSE Isoform 3 of MICOS complex subunit Mic26 OS=Mus musculus GN=Apoo	5	5
TRUE	Old_Decellularized / Young_Decellularized	Old_Decellularized	Young_Decellularized	20	P52431	125545	61667.2	-1.02563	1.02563	-50.8804	0.491196	0	0.00180252	0.00282172	19	0.303969	P52431	DPOD1_MOUSE	DNA polymerase delta catalytic subunit	Pold1	P52431	Mus musculus	DNA synthesis involved in DNA repair,DNA replication,base-excision repair, gap-filling,nucleotide-excision repair, DNA gap filling,cellular response to UV,DNA replication proofreading,fatty acid homeostasis,nucleic acid phosphodiester bond hydrolysis	nucleotide binding,DNA binding,chromatin binding,damaged DNA binding,DNA-directed DNA polymerase activity,3'-5'-exodeoxyribonuclease activity,3'-5' exonuclease activity,enzyme binding,metal ion binding,4 iron, 4 sulfur cluster binding	nucleotide-excision repair complex,nucleus,nucleoplasm,cytosol,membrane,aggresome,delta DNA polymerase complex,nuclear chromosome, telomeric region	sp	1	2	uniprot_mouse_proteome	>sp|P52431|DPOD1_MOUSE DNA polymerase delta catalytic subunit OS=Mus musculus GN=Pold1 PE=1 SV=2	4	4
TRUE	Old_Decellularized / Young_Decellularized	Old_Decellularized	Young_Decellularized	10	P01029	40880.4	66618.8	0.704521	0.704521	62.9604	1.6296	0	0.00186754	0.002901	9	0.156974	P01029	CO4B_MOUSE	Complement C4-B	C4b	P01029	Mus musculus	inflammatory response,complement activation,complement activation, classical pathway,negative regulation of endopeptidase activity,immunoglobulin mediated immune response,innate immune response	complement binding,complement component C1q binding,endopeptidase inhibitor activity,carbohydrate binding	extracellular space,cell junction,axon,dendrite,neuronal cell body,other organism cell,synapse,extracellular exosome,blood microparticle	sp	1	3	uniprot_mouse_proteome	>sp|P01029|CO4B_MOUSE Complement C4-B OS=Mus musculus GN=C4b PE=1 SV=3	2	2
TRUE	Old_Decellularized / Young_Decellularized	Old_Decellularized	Young_Decellularized	30	E9PXM9	208433	33929.5	-2.61897	2.61897	-83.7216	0.162784	0	0.00198451	0.00306433	29	0.820677	E9PXM9	E9PXM9_MOUSE	Protein Fbxw24	Fbxw24	E9PXM9	Mus musculus	biological_process	molecular_function	cellular_component	tr	4	1	uniprot_mouse_proteome	>tr|E9PXM9|E9PXM9_MOUSE Protein Fbxw24 OS=Mus musculus GN=Fbxw24 PE=4 SV=1	6	6
TRUE	Old_Decellularized / Young_Decellularized	Old_Decellularized	Young_Decellularized	15	A2RSJ4	20092.4	33783.2	0.749658	0.749658	68.1395	1.68139	0	0.00209394	0.0032211	14	0.269203	A2RSJ4	UH1BL_MOUSE	UHRF1-binding protein 1-like	Uhrf1bp1l	A2RSJ4	Mus musculus	biological_process	molecular_function	cellular_component	sp	1	2	uniprot_mouse_proteome	>sp|A2RSJ4|UH1BL_MOUSE UHRF1-binding protein 1-like OS=Mus musculus GN=Uhrf1bp1l PE=1 SV=2	3	3
TRUE	Old_Decellularized / Young_Decellularized	Old_Decellularized	Young_Decellularized	10	P22724	18032.3	44411	1.30033	1.30033	146.285	2.46285	0	0.00218033	0.003336	9	0.362788	P22724	WNT4_MOUSE	Protein Wnt-4	Wnt4	P22724	Mus musculus	metanephros development,branching involved in ureteric bud morphogenesis,mesonephros development,epithelial to mesenchymal transition,embryonic epithelial tube formation,liver development,androgen biosynthetic process,signal transduction,cell-cell signaling,gamete generation,sex differentiation,male gonad development,female gonad development,cellular response to starvation,negative regulation of …	transcription corepressor activity,receptor binding,frizzled binding,protein binding	extracellular region,proteinaceous extracellular matrix,extracellular space,cytoplasm,endoplasmic reticulum lumen,cell surface	sp	1	1	uniprot_mouse_proteome	>sp|P22724|WNT4_MOUSE Protein Wnt-4 OS=Mus musculus GN=Wnt4 PE=1 SV=1	2	2
TRUE	Old_Decellularized / Young_Decellularized	Old_Decellularized	Young_Decellularized	20	A0A1B0GT63;G3X9F4;Q8VD26;Q8VD26-2	54219.8	96866.8	0.837182	0.837182	78.6557	1.78656	0	0.0022486	0.00342209	19	0.231082	A0A1B0GT63;G3X9F4;Q8VD26;Q8VD26-2	A0A1B0GT63_MOUSE;G3X9F4_MOUSE;TM143_MOUSE;TM143_MOUSE	Transmembrane protein 143;Transmembrane protein 143;Transmembrane protein 143;Isoform 2 of Transmembrane protein 143	Tmem143	A0A1B0GT63;G3X9F4;Q8VD26;Q8VD26-2	Mus musculus	;;hematopoietic progenitor cell differentiation;	;;molecular_function;	;;mitochondrion,integral component of membrane;	tr;tr;sp;sp	1;1;1;	1;1;1;	uniprot_mouse_proteome	>tr|A0A1B0GT63|A0A1B0GT63_MOUSE Transmembrane protein 143 OS=Mus musculus GN=Tmem143 PE=1 SV=1;>tr|G3X9F4|G3X9F4_MOUSE Transmembrane protein 143 OS=Mus musculus GN=Tmem143 PE=1 SV=1;>sp|Q8VD26|TM143_MOUSE Transmembrane protein 143 OS=Mus musculus GN=Tmem143 PE=1 SV=1;>sp|Q8VD26-2|TM143_MOUSE Isoform 2 of Transmembrane protein 143 OS=Mus musculus GN=Tmem143	4	4
TRUE	Old_Decellularized / Young_Decellularized	Old_Decellularized	Young_Decellularized	20	Q5PRF0	111542	26083.9	-2.09635	2.09635	-76.6151	0.233849	0	0.00229346	0.00346817	19	0.448345	Q5PRF0	HTR5A_MOUSE	HEAT repeat-containing protein 5A	Heatr5a	Q5PRF0	Mus musculus	biological_process	molecular_function	cellular_component	sp	1	2	uniprot_mouse_proteome	>sp|Q5PRF0|HTR5A_MOUSE HEAT repeat-containing protein 5A OS=Mus musculus GN=Heatr5a PE=1 SV=2	4	4
TRUE	Old_Decellularized / Young_Decellularized	Old_Decellularized	Young_Decellularized	15	Q8VHN8	177933	114164	-0.640218	0.640218	-35.8384	0.641616	0	0.00231825	0.00349409	14	0.158944	Q8VHN8	SDOS_MOUSE	Protein syndesmos	Nudt16l1	Q8VHN8	Mus musculus	negative regulation of double-strand break repair via nonhomologous end joining	RNA binding,snoRNA binding,protein homodimerization activity,m7G(5')pppN diphosphatase activity	nucleus	sp	1	2	uniprot_mouse_proteome	>sp|Q8VHN8|SDOS_MOUSE Protein syndesmos OS=Mus musculus GN=Nudt16l1 PE=1 SV=2	3	3
TRUE	Old_Decellularized / Young_Decellularized	Old_Decellularized	Young_Decellularized	35	G5E895	685753	416791	-0.718365	0.718365	-39.2214	0.607786	0	0.00233164	0.0035073	34	0.209769	G5E895	G5E895_MOUSE	MCG142264, isoform CRA_b	Akr1b10	G5E895	Mus musculus	oxidation-reduction process	oxidoreductase activity	mitochondrion	tr	1	1	uniprot_mouse_proteome	>tr|G5E895|G5E895_MOUSE MCG142264, isoform CRA_b OS=Mus musculus GN=Akr1b10 PE=1 SV=1	7	7
TRUE	Old_Decellularized / Young_Decellularized	Old_Decellularized	Young_Decellularized	10	Q8CFT3;Q9Z0W1	19115.9	45743.5	1.25879	1.25879	139.295	2.39295	0	0.00235658	0.00353734	9	0.311816	Q8CFT3;Q9Z0W1	Q8CFT3_MOUSE;TNR16_MOUSE	Nerve growth factor receptor (TNFR superfamily, member 16);Tumor necrosis factor receptor superfamily member 16	Ngfr	Q8CFT3;Q9Z0W1	Mus musculus	;intracellular protein transport,apoptotic process,activation of cysteine-type endopeptidase activity involved in apoptotic process,inflammatory response,immune response,Rho protein signal transduction,axon guidance,central nervous system development,circadian rhythm,regulation of gene expression,negative regulation of neuron projection development,detection of temperature stimulus,nerve developm…	;tumor necrosis factor-activated receptor activity,death receptor activity,protein binding,calmodulin binding,coreceptor activity,Rab GTPase binding,ubiquitin protein ligase binding,nerve growth factor binding	;nucleus,cytoplasm,plasma membrane,integral component of plasma membrane,cell-cell junction,cell surface,postsynaptic density,neuron projection	tr;sp	1	1	uniprot_mouse_proteome	>tr|Q8CFT3|Q8CFT3_MOUSE Nerve growth factor receptor (TNFR superfamily, member 16) OS=Mus musculus GN=Ngfr PE=1 SV=1;>sp|Q9Z0W1|TNR16_MOUSE Tumor necrosis factor receptor superfamily member 16 OS=Mus musculus GN=Ngfr PE=1 SV=1	2	2
TRUE	Old_Decellularized / Young_Decellularized	Old_Decellularized	Young_Decellularized	20	Q6IFX2	437080	277306	-0.656421	0.656421	-36.555	0.63445	0	0.0024529	0.00364198	19	0.192787	Q6IFX2	K1C42_MOUSE	Keratin, type I cytoskeletal 42	Krt42	Q6IFX2	Mus musculus	biological_process	structural molecule activity	cytoplasm,intermediate filament	sp	1	1	uniprot_mouse_proteome	>sp|Q6IFX2|K1C42_MOUSE Keratin, type I cytoskeletal 42 OS=Mus musculus GN=Krt42 PE=1 SV=1	4	4
TRUE	Old_Decellularized / Young_Decellularized	Old_Decellularized	Young_Decellularized	10	B7ZNL8;F7CG42;Q91VU7	118908	74556.3	-0.673441	0.673441	-37.2991	0.627009	0	0.00254449	0.00374362	9	0.142328	B7ZNL8;F7CG42;Q91VU7	B7ZNL8_MOUSE;F7CG42_MOUSE;Q91VU7_MOUSE	Protein Pus7;Protein Pus7 (Fragment);Protein Pus7	Pus7	B7ZNL8;F7CG42;Q91VU7	Mus musculus	pseudouridine synthesis;;	RNA binding,pseudouridine synthase activity,enzyme binding;;	nucleus;;	tr	1	1;1;2	uniprot_mouse_proteome	>tr|B7ZNL8|B7ZNL8_MOUSE Protein Pus7 OS=Mus musculus GN=Pus7 PE=1 SV=1;>tr|F7CG42|F7CG42_MOUSE Protein Pus7 (Fragment) OS=Mus musculus GN=Pus7 PE=1 SV=1;>tr|Q91VU7|Q91VU7_MOUSE Protein Pus7 OS=Mus musculus GN=Pus7 PE=1 SV=2	2	2
TRUE	Old_Decellularized / Young_Decellularized	Old_Decellularized	Young_Decellularized	10	Q07456	49262.5	112219	1.18776	1.18776	127.798	2.27798	0	0.00270668	0.00395159	9	0.321813	Q07456	AMBP_MOUSE	Protein AMBP	Ambp	Q07456	Mus musculus	negative regulation of endopeptidase activity,protein-chromophore linkage,protein catabolic process,protein maturation	serine-type endopeptidase inhibitor activity,IgA binding,heme binding,small molecule binding,protein homodimerization activity	extracellular space,plasma membrane,cell surface,extracellular matrix,intracellular membrane-bounded organelle,extracellular exosome,blood microparticle	sp	1	2	uniprot_mouse_proteome	>sp|Q07456|AMBP_MOUSE Protein AMBP OS=Mus musculus GN=Ambp PE=1 SV=2	2	2
TRUE	Old_Decellularized / Young_Decellularized	Old_Decellularized	Young_Decellularized	10	Q8BWZ3;Q8BWZ3-2	85345.8	51087.6	-0.740349	0.740349	-40.1405	0.598595	0	0.0028241	0.00410935	9	0.267286	Q8BWZ3;Q8BWZ3-2	NAA25_MOUSE	N-alpha-acetyltransferase 25, NatB auxiliary subunit;Isoform 2 of N-alpha-acetyltransferase 25, NatB auxiliary subunit	Naa25	Q8BWZ3;Q8BWZ3-2	Mus musculus	N-terminal peptidyl-methionine acetylation;	peptide alpha-N-acetyltransferase activity;	cytoplasm,Golgi apparatus,cytosol,NatB complex;	sp	1;	1;	uniprot_mouse_proteome	>sp|Q8BWZ3|NAA25_MOUSE N-alpha-acetyltransferase 25, NatB auxiliary subunit OS=Mus musculus GN=Naa25 PE=1 SV=1;>sp|Q8BWZ3-2|NAA25_MOUSE Isoform 2 of N-alpha-acetyltransferase 25, NatB auxiliary subunit OS=Mus musculus GN=Naa25	2	2
TRUE	Old_Decellularized / Young_Decellularized	Old_Decellularized	Young_Decellularized	20	Q6P5B0	113508	75155.8	-0.594843	0.594843	-33.7884	0.662116	0	0.0029084	0.00421016	19	0.147606	Q6P5B0	RRP12_MOUSE	RRP12-like protein	Rrp12	Q6P5B0	Mus musculus	biological_process	RNA binding	nucleolus,integral component of membrane,nuclear membrane	sp	1	1	uniprot_mouse_proteome	>sp|Q6P5B0|RRP12_MOUSE RRP12-like protein OS=Mus musculus GN=Rrp12 PE=1 SV=1	4	4
TRUE	Old_Decellularized / Young_Decellularized	Old_Decellularized	Young_Decellularized	10	Q8BIA4;Q8BIA4-4	56718.4	21267.9	-1.41514	1.41514	-62.5026	0.374974	0	0.00299385	0.004308	9	0.356669	Q8BIA4;Q8BIA4-4	FBXW8_MOUSE	F-box/WD repeat-containing protein 8;Isoform 2 of F-box/WD repeat-containing protein 8	Fbxw8	Q8BIA4;Q8BIA4-4	Mus musculus	ubiquitin-dependent protein catabolic process,Golgi organization,cell proliferation,protein ubiquitination,positive regulation of dendrite morphogenesis,spongiotrophoblast layer development,labyrinthine layer blood vessel development;	ubiquitin-protein transferase activity,protein binding;	Golgi apparatus,cytosol,SCF ubiquitin ligase complex,Cul7-RING ubiquitin ligase complex,perinuclear region of cytoplasm,3M complex;	sp	1;	2;	uniprot_mouse_proteome	>sp|Q8BIA4|FBXW8_MOUSE F-box/WD repeat-containing protein 8 OS=Mus musculus GN=Fbxw8 PE=1 SV=2;>sp|Q8BIA4-4|FBXW8_MOUSE Isoform 2 of F-box/WD repeat-containing protein 8 OS=Mus musculus GN=Fbxw8	2	2
TRUE	Old_Decellularized / Young_Decellularized	Old_Decellularized	Young_Decellularized	155	P54869	10495180	5.85532e+06	-0.841907	0.841907	-44.2094	0.557906	0	0.00303159	0.00435353	154	0.167197	P54869	HMCS2_MOUSE	Hydroxymethylglutaryl-CoA synthase, mitochondrial	Hmgcs2	P54869	Mus musculus	cholesterol biosynthetic process,isoprenoid biosynthetic process	hydroxymethylglutaryl-CoA synthase activity	mitochondrion,mitochondrial inner membrane	sp	1	2	uniprot_mouse_proteome	>sp|P54869|HMCS2_MOUSE Hydroxymethylglutaryl-CoA synthase, mitochondrial OS=Mus musculus GN=Hmgcs2 PE=1 SV=2	20	31
TRUE	Old_Decellularized / Young_Decellularized	Old_Decellularized	Young_Decellularized	10	Q6PHN7	149411	82528.6	-0.856316	0.856316	-44.7639	0.552361	0	0.00317347	0.00448501	9	0.201943	Q6PHN7	TM164_MOUSE	Transmembrane protein 164	Tmem164	Q6PHN7	Mus musculus	biological_process	molecular_function	cellular_component,integral component of membrane	sp	1	1	uniprot_mouse_proteome	>sp|Q6PHN7|TM164_MOUSE Transmembrane protein 164 OS=Mus musculus GN=Tmem164 PE=1 SV=1	2	2
TRUE	Old_Decellularized / Young_Decellularized	Old_Decellularized	Young_Decellularized	10	P43117	475236	718094	0.595528	0.595528	51.1026	1.51103	0	0.0033196	0.0046638	9	0.153012	P43117	PF2R_MOUSE	Prostaglandin F2-alpha receptor	Ptgfr	P43117	Mus musculus	G-protein coupled receptor signaling pathway,positive regulation of cell proliferation,positive regulation of gene expression,response to estradiol,response to lipopolysaccharide,calcium-mediated signaling using intracellular calcium source,negative regulation of apoptotic process,cellular response to prostaglandin D stimulus	prostaglandin F receptor activity	extracellular region,cytoplasm,plasma membrane,integral component of membrane	sp	2	1	uniprot_mouse_proteome	>sp|P43117|PF2R_MOUSE Prostaglandin F2-alpha receptor OS=Mus musculus GN=Ptgfr PE=2 SV=1	2	2
TRUE	Old_Decellularized / Young_Decellularized	Old_Decellularized	Young_Decellularized	10	P04441;P04441-2	32323.7	60361.7	0.901041	0.901041	86.7413	1.86741	0	0.00333187	0.00467183	9	0.273988	P04441;P04441-2	HG2A_MOUSE	H-2 class II histocompatibility antigen gamma chain;Isoform Short of H-2 class II histocompatibility antigen gamma chain	Cd74	P04441;P04441-2	Mus musculus	activation of MAPK activity,prostaglandin biosynthetic process,positive regulation of protein phosphorylation,positive regulation of cytokine-mediated signaling pathway,positive regulation of dendritic cell antigen processing and presentation,negative regulation of peptide secretion,positive regulation of adaptive immune response,positive regulation of type 2 immune response,negative regulation o…	beta-amyloid binding,cytokine receptor activity,protein binding,cytokine binding,MHC class II protein complex binding,macrophage migration inhibitory factor binding,MHC class II protein binding,CD4 receptor binding,MHC class II protein binding, via antigen binding groove,protein binding involved in protein folding,nitric-oxide synthase binding;	lysosome,late endosome,multivesicular body,vacuole,endoplasmic reticulum,Golgi apparatus,plasma membrane,integral component of plasma membrane,external side of plasma membrane,cell surface,membrane,integral component of membrane,macrophage migration inhibitory factor receptor complex,NOS2-CD74 complex,extracellular exosome,MHC class II protein complex;	sp	1;	3;	uniprot_mouse_proteome	>sp|P04441|HG2A_MOUSE H-2 class II histocompatibility antigen gamma chain OS=Mus musculus GN=Cd74 PE=1 SV=3;>sp|P04441-2|HG2A_MOUSE Isoform Short of H-2 class II histocompatibility antigen gamma chain OS=Mus musculus GN=Cd74	2	2
TRUE	Old_Decellularized / Young_Decellularized	Old_Decellularized	Young_Decellularized	15	A2BDX3	3.77408e+06	2.50574e+06	-0.590884	0.590884	-33.6064	0.663936	0	0.00360528	0.00496248	14	0.108716	A2BDX3	MOCS3_MOUSE	Adenylyltransferase and sulfurtransferase MOCS3	Mocs3	A2BDX3	Mus musculus	tRNA wobble uridine modification,tRNA wobble position uridine thiolation,Mo-molybdopterin cofactor biosynthetic process,enzyme active site formation via cysteine modification to L-cysteine persulfide,protein urmylation,tRNA thio-modification	thiosulfate sulfurtransferase activity,ATP binding,nucleotidyltransferase activity,sulfurtransferase activity,URM1 activating enzyme activity,metal ion binding,molybdopterin-synthase sulfurtransferase activity,molybdopterin-synthase adenylyltransferase activity	cytoplasm,cytosol	sp	1	1	uniprot_mouse_proteome	>sp|A2BDX3|MOCS3_MOUSE Adenylyltransferase and sulfurtransferase MOCS3 OS=Mus musculus GN=Mocs3 PE=1 SV=1	3	3
TRUE	Old_Decellularized / Young_Decellularized	Old_Decellularized	Young_Decellularized	25	Q9D3D9	1.46045e+06	2.44439e+06	0.74306	0.74306	67.3722	1.67372	0	0.00369517	0.00505888	24	0.306514	Q9D3D9	ATPD_MOUSE	ATP synthase subunit delta, mitochondrial	Atp5d	Q9D3D9	Mus musculus	ATP synthesis coupled proton transport,proton transport,Requires Ontology	hydrogen ion transmembrane transporter activity,ATPase activity,proton-transporting ATP synthase activity, rotational mechanism	mitochondrial proton-transporting ATP synthase complex, catalytic core F(1),mitochondrion,mitochondrial envelope,mitochondrial inner membrane,mitochondrial proton-transporting ATP synthase complex,proton-transporting ATP synthase complex	sp	1	1	uniprot_mouse_proteome	>sp|Q9D3D9|ATPD_MOUSE ATP synthase subunit delta, mitochondrial OS=Mus musculus GN=Atp5d PE=1 SV=1	4	5
TRUE	Old_Decellularized / Young_Decellularized	Old_Decellularized	Young_Decellularized	20	Q9QZF2	73551.2	132657	0.85088	0.85088	80.3601	1.8036	0	0.00385451	0.00523479	19	0.513831	Q9QZF2	GPC1_MOUSE	Glypican-1	Gpc1	Q9QZF2	Mus musculus	glycosaminoglycan biosynthetic process,Schwann cell differentiation,heparan sulfate proteoglycan catabolic process,myelin assembly,negative regulation of fibroblast growth factor receptor signaling pathway,positive regulation of skeletal muscle cell differentiation	copper ion binding,fibroblast growth factor binding,laminin binding,heparan sulfate proteoglycan binding	proteinaceous extracellular matrix,nucleoplasm,endosome,Golgi lumen,cytosol,plasma membrane,extracellular matrix,anchored component of membrane,membrane raft,extracellular exosome	sp	1	1	uniprot_mouse_proteome	>sp|Q9QZF2|GPC1_MOUSE Glypican-1 OS=Mus musculus GN=Gpc1 PE=1 SV=1	4	4
TRUE	Old_Decellularized / Young_Decellularized	Old_Decellularized	Young_Decellularized	10	Q8BHB4	123153	71763.9	-0.779126	0.779126	-41.728	0.58272	0	0.00398643	0.0053781	9	0.217387	Q8BHB4	WDR3_MOUSE	WD repeat-containing protein 3	Wdr3	Q8BHB4	Mus musculus	maturation of SSU-rRNA	RNA binding,snoRNA binding	nucleus,nucleolus,nuclear membrane,small-subunit processome,Pwp2p-containing subcomplex of 90S preribosome	sp	1	1	uniprot_mouse_proteome	>sp|Q8BHB4|WDR3_MOUSE WD repeat-containing protein 3 OS=Mus musculus GN=Wdr3 PE=1 SV=1	2	2
TRUE	Old_Decellularized / Young_Decellularized	Old_Decellularized	Young_Decellularized	10	E9Q718;Q9R0B9	60150.4	36470.5	-0.721845	0.721845	-39.3678	0.606322	0	0.00447182	0.00594298	9	0.175007	E9Q718;Q9R0B9	E9Q718_MOUSE;PLOD2_MOUSE	Procollagen-lysine,2-oxoglutarate 5-dioxygenase 2;Procollagen-lysine,2-oxoglutarate 5-dioxygenase 2	Plod2	E9Q718;Q9R0B9	Mus musculus	;peptidyl-lysine hydroxylation,hydroxylysine biosynthetic process,oxidation-reduction process	;iron ion binding,procollagen-lysine 5-dioxygenase activity,L-ascorbic acid binding	;rough endoplasmic reticulum membrane,extracellular exosome	tr;sp	1	1;2	uniprot_mouse_proteome	>tr|E9Q718|E9Q718_MOUSE Procollagen-lysine,2-oxoglutarate 5-dioxygenase 2 OS=Mus musculus GN=Plod2 PE=1 SV=1;>sp|Q9R0B9|PLOD2_MOUSE Procollagen-lysine,2-oxoglutarate 5-dioxygenase 2 OS=Mus musculus GN=Plod2 PE=1 SV=2	2	2
TRUE	Old_Decellularized / Young_Decellularized	Old_Decellularized	Young_Decellularized	15	Q5SQ20;Q9EQ61	113234	73583.9	-0.621842	0.621842	-35.0159	0.649841	0	0.00458583	0.00607186	14	0.180256	Q5SQ20;Q9EQ61	Q5SQ20_MOUSE;PESC_MOUSE	Pescadillo homolog	Pes1	Q5SQ20;Q9EQ61	Mus musculus	;maturation of LSU-rRNA from tricistronic rRNA transcript (SSU-rRNA, 5.8S rRNA, LSU-rRNA),maturation of 5.8S rRNA from tricistronic rRNA transcript (SSU-rRNA, 5.8S rRNA, LSU-rRNA),rRNA processing,nucleolus organization,cell proliferation,protein localization to organelle,ribosome biogenesis,regulation of cell cycle	;RNA binding,protein binding	;condensed chromosome,nucleus,nucleoplasm,nucleolus,cytosol,membrane,preribosome, large subunit precursor,PeBoW complex	tr;sp	1	1	uniprot_mouse_proteome	>tr|Q5SQ20|Q5SQ20_MOUSE Pescadillo homolog OS=Mus musculus GN=Pes1 PE=1 SV=1;>sp|Q9EQ61|PESC_MOUSE Pescadillo homolog OS=Mus musculus GN=Pes1 PE=1 SV=1	3	3
TRUE	Old_Decellularized / Young_Decellularized	Old_Decellularized	Young_Decellularized	55	Q04997	2.17415e+06	960771	-1.17819	1.17819	-55.8094	0.441906	0	0.00473504	0.00621747	54	0.23108	Q04997	INHA_MOUSE	Inhibin alpha chain	Inha	Q04997	Mus musculus	ovarian follicle development,male gonad development,regulation of receptor activity,positive regulation of pathway-restricted SMAD protein phosphorylation,BMP signaling pathway,regulation of cell proliferation,hemoglobin biosynthetic process,regulation of apoptotic process,regulation of MAPK cascade,negative regulation of follicle-stimulating hormone secretion,cell development,regulation of cell …	receptor binding,cytokine activity,transforming growth factor beta receptor binding,hormone activity,growth factor activity,inhibin binding,protein heterodimerization activity	photoreceptor outer segment,photoreceptor inner segment,extracellular space,cytoplasm,inhibin-betaglycan-ActRII complex,neuronal cell body,inhibin A complex,inhibin B complex	sp	1	2	uniprot_mouse_proteome	>sp|Q04997|INHA_MOUSE Inhibin alpha chain OS=Mus musculus GN=Inha PE=1 SV=2	6	11
TRUE	Old_Decellularized / Young_Decellularized	Old_Decellularized	Young_Decellularized	25	O35969;O35969-2	205273	317349	0.62853	0.62853	54.5989	1.54599	0	0.00588398	0.00751169	24	0.559845	O35969;O35969-2	GAMT_MOUSE	Guanidinoacetate N-methyltransferase;Isoform 2 of Guanidinoacetate N-methyltransferase	Gamt	O35969;O35969-2	Mus musculus	creatine biosynthetic process,spermatogenesis,animal organ morphogenesis,methylation,regulation of multicellular organism growth,S-adenosylhomocysteine metabolic process,S-adenosylmethionine metabolic process;	guanidinoacetate N-methyltransferase activity;	nucleus,cytoplasm,microvillus,extracellular exosome;	sp	1;	1;	uniprot_mouse_proteome	>sp|O35969|GAMT_MOUSE Guanidinoacetate N-methyltransferase OS=Mus musculus GN=Gamt PE=1 SV=1;>sp|O35969-2|GAMT_MOUSE Isoform 2 of Guanidinoacetate N-methyltransferase OS=Mus musculus GN=Gamt	5	5
TRUE	Old_Decellularized / Young_Decellularized	Old_Decellularized	Young_Decellularized	10	Q52KR3;Q52KR3-2;Q52KR3-3;Q52KR3-4;Q52KR3-6	50476.6	91598.2	0.859705	0.859705	81.4667	1.81467	0	0.00590697	0.00753429	9	0.311525	Q52KR3;Q52KR3-2;Q52KR3-3;Q52KR3-4;Q52KR3-6	PRUN2_MOUSE	Protein prune homolog 2;Isoform 2 of Protein prune homolog 2;Isoform 3 of Protein prune homolog 2;Isoform 4 of Protein prune homolog 2;Isoform 6 of Protein prune homolog 2	Prune2	Q52KR3;Q52KR3-2;Q52KR3-3;Q52KR3-4;Q52KR3-6	Mus musculus	apoptotic process;;;;	pyrophosphatase activity;;;;	cytoplasm;;;;	sp	1;;;;	2;;;;	uniprot_mouse_proteome	>sp|Q52KR3|PRUN2_MOUSE Protein prune homolog 2 OS=Mus musculus GN=Prune2 PE=1 SV=2;>sp|Q52KR3-2|PRUN2_MOUSE Isoform 2 of Protein prune homolog 2 OS=Mus musculus GN=Prune2;>sp|Q52KR3-3|PRUN2_MOUSE Isoform 3 of Protein prune homolog 2 OS=Mus musculus GN=Prune2;>sp|Q52KR3-4|PRUN2_MOUSE Isoform 4 of Protein prune homolog 2 OS=Mus musculus GN=Prune2;>sp|Q52KR3-6|PRUN2_MOUSE Isoform 6 of Protein prune …	2	2
TRUE	Old_Decellularized / Young_Decellularized	Old_Decellularized	Young_Decellularized	15	A0A075B5V1	62743.3	164810	1.39327	1.39327	162.673	2.62673	0	0.00598065	0.00761465	14	0.41563	A0A075B5V1	A0A075B5V1_MOUSE	Protein Ighv1-31	Ighv1-31	A0A075B5V1	Mus musculus				tr	4	1	uniprot_mouse_proteome	>tr|A0A075B5V1|A0A075B5V1_MOUSE Protein Ighv1-31 OS=Mus musculus GN=Ighv1-31 PE=4 SV=1	3	3
TRUE	Old_Decellularized / Young_Decellularized	Old_Decellularized	Young_Decellularized	10	Q8C259;Q8C6U2	98645.8	150898	0.613246	0.613246	52.9697	1.5297	0	0.00599526	0.00761965	9	0.18596	Q8C259;Q8C6U2	Q8C259_MOUSE;PQLC3_MOUSE	PQ-loop repeat-containing protein 3	Pqlc3	Q8C259;Q8C6U2	Mus musculus	;dolichol-linked oligosaccharide biosynthetic process	;molecular_function	;integral component of membrane	tr;sp	1	1	uniprot_mouse_proteome	>tr|Q8C259|Q8C259_MOUSE PQ-loop repeat-containing protein 3 OS=Mus musculus GN=Pqlc3 PE=1 SV=1;>sp|Q8C6U2|PQLC3_MOUSE PQ-loop repeat-containing protein 3 OS=Mus musculus GN=Pqlc3 PE=1 SV=1	2	2
TRUE	Old_Decellularized / Young_Decellularized	Old_Decellularized	Young_Decellularized	10	Q3U4I7	35877.7	55706.8	0.634766	0.634766	55.2686	1.55269	0	0.00605379	0.00767351	9	0.199443	Q3U4I7	PYRD2_MOUSE	Pyridine nucleotide-disulfide oxidoreductase domain-containing protein 2	Pyroxd2	Q3U4I7	Mus musculus	oxidation-reduction process	oxidoreductase activity	intracellular	sp	1	3	uniprot_mouse_proteome	>sp|Q3U4I7|PYRD2_MOUSE Pyridine nucleotide-disulfide oxidoreductase domain-containing protein 2 OS=Mus musculus GN=Pyroxd2 PE=1 SV=3	2	2
TRUE	Old_Decellularized / Young_Decellularized	Old_Decellularized	Young_Decellularized	10	P08905	48373.1	97864.9	1.01659	1.01659	102.312	2.02312	0	0.00618424	0.00781369	9	0.353785	P08905	LYZ2_MOUSE	Lysozyme C-2	Lyz2	P08905	Mus musculus	cell wall macromolecule catabolic process,cytolysis,defense response to bacterium,defense response to Gram-negative bacterium,defense response to Gram-positive bacterium	lysozyme activity,identical protein binding	extracellular space,extracellular exosome	sp	1	2	uniprot_mouse_proteome	>sp|P08905|LYZ2_MOUSE Lysozyme C-2 OS=Mus musculus GN=Lyz2 PE=1 SV=2	2	2
TRUE	Old_Decellularized / Young_Decellularized	Old_Decellularized	Young_Decellularized	20	A2A8R7;B2RX14	97284.9	57115.8	-0.768325	0.768325	-41.2901	0.587099	0	0.00629857	0.00794846	19	0.295908	A2A8R7;B2RX14	A2A8R7_MOUSE;TUT4_MOUSE	Terminal uridylyltransferase 4	Zcchc11	A2A8R7;B2RX14	Mus musculus	;cytokine production,miRNA metabolic process,miRNA catabolic process,stem cell population maintenance,pre-miRNA processing,RNA 3'-end processing,regulation of lipopolysaccharide-mediated signaling pathway,negative regulation of NF-kappaB transcription factor activity,positive regulation of interleukin-6 production,interleukin-6-mediated signaling pathway,histone mRNA catabolic process	;RNA binding,protein binding,zinc ion binding,RNA uridylyltransferase activity	;extracellular space,nucleus,nucleolus,cytoplasm,cytosol,extracellular exosome	tr;sp	1	1;2	uniprot_mouse_proteome	>tr|A2A8R7|A2A8R7_MOUSE Terminal uridylyltransferase 4 OS=Mus musculus GN=Zcchc11 PE=1 SV=1;>sp|B2RX14|TUT4_MOUSE Terminal uridylyltransferase 4 OS=Mus musculus GN=Zcchc11 PE=1 SV=2	4	4
TRUE	Old_Decellularized / Young_Decellularized	Old_Decellularized	Young_Decellularized	10	Q6DFV7	18339.7	34688.2	0.919472	0.919472	89.1423	1.89142	0	0.00635369	0.0079905	9	0.316778	Q6DFV7	NCOA7_MOUSE	Nuclear receptor coactivator 7	Ncoa7	Q6DFV7	Mus musculus	transcription, DNA-templated,positive regulation of transcription from RNA polymerase II promoter,negative regulation of cellular response to oxidative stress,negative regulation of peptidyl-cysteine S-nitrosylation,negative regulation of oxidative stress-induced neuron death	ligand-dependent nuclear receptor transcription coactivator activity,nuclear hormone receptor binding	intracellular,nucleus	sp	1	2	uniprot_mouse_proteome	>sp|Q6DFV7|NCOA7_MOUSE Nuclear receptor coactivator 7 OS=Mus musculus GN=Ncoa7 PE=1 SV=2	2	2
TRUE	Old_Decellularized / Young_Decellularized	Old_Decellularized	Young_Decellularized	25	B1AVD1;B1AVD2	293291	120170	-1.28726	1.28726	-59.0271	0.409729	0	0.00684525	0.00852518	24	0.414183	B1AVD1;B1AVD2	B1AVD1_MOUSE;B1AVD2_MOUSE	Protein Xpnpep2	Xpnpep2	B1AVD1;B1AVD2	Mus musculus	proteolysis,biological_process;	molecular_function,metal ion binding,metalloaminopeptidase activity;	plasma membrane,anchored component of membrane,extracellular exosome;	tr	1	1	uniprot_mouse_proteome	>tr|B1AVD1|B1AVD1_MOUSE Protein Xpnpep2 OS=Mus musculus GN=Xpnpep2 PE=1 SV=1;>tr|B1AVD2|B1AVD2_MOUSE Protein Xpnpep2 OS=Mus musculus GN=Xpnpep2 PE=1 SV=1	5	5
TRUE	Old_Decellularized / Young_Decellularized	Old_Decellularized	Young_Decellularized	25	O88792	383140	580251	0.598808	0.598808	51.4465	1.51446	0	0.00725435	0.00893325	24	0.303078	O88792	JAM1_MOUSE	Junctional adhesion molecule A	F11r	O88792	Mus musculus	regulation of cytokine production,cell adhesion,response to radiation,epithelial cell differentiation,actomyosin structure organization,negative regulation of GTPase activity,positive regulation of GTPase activity,positive regulation of blood pressure,intestinal absorption,protein localization to plasma membrane,establishment of endothelial intestinal barrier,regulation of membrane permeability,r…	PDZ domain binding,cadherin binding	plasma membrane,bicellular tight junction,integral component of membrane,cytoplasmic vesicle,slit diaphragm,extracellular exosome	sp	1	2	uniprot_mouse_proteome	>sp|O88792|JAM1_MOUSE Junctional adhesion molecule A OS=Mus musculus GN=F11r PE=1 SV=2	5	5
TRUE	Old_Decellularized / Young_Decellularized	Old_Decellularized	Young_Decellularized	10	E9PWH6;Q8BQM4	18068.6	6283.55	-1.52384	1.52384	-65.224	0.34776	0	0.00754156	0.00926294	9	0.398585	E9PWH6;Q8BQM4	E9PWH6_MOUSE;HEAT3_MOUSE	HEAT repeat-containing protein 3	Heatr3	E9PWH6;Q8BQM4	Mus musculus	;protein import into nucleus,ribosomal large subunit biogenesis	;unfolded protein binding	;cellular_component,intracellular	tr;sp	1	1	uniprot_mouse_proteome	>tr|E9PWH6|E9PWH6_MOUSE HEAT repeat-containing protein 3 OS=Mus musculus GN=Heatr3 PE=1 SV=1;>sp|Q8BQM4|HEAT3_MOUSE HEAT repeat-containing protein 3 OS=Mus musculus GN=Heatr3 PE=1 SV=1	2	2
TRUE	Old_Decellularized / Young_Decellularized	Old_Decellularized	Young_Decellularized	10	Q9QZ85	37359.8	58121	0.637572	0.637572	55.5708	1.55571	0	0.0077946	0.0095106	9	0.240766	Q9QZ85	IIGP1_MOUSE	Interferon-inducible GTPase 1	Iigp1	Q9QZ85	Mus musculus	regulation of autophagy,cytokine-mediated signaling pathway,cellular response to interferon-beta,defense response to protozoan,innate immune response,defense response to Gram-negative bacterium	GTPase activity,protein binding,GTP binding,GDP binding,identical protein binding	endoplasmic reticulum membrane,symbiont-containing vacuole membrane,nuclear membrane,Golgi cisterna membrane	sp	1	2	uniprot_mouse_proteome	>sp|Q9QZ85|IIGP1_MOUSE Interferon-inducible GTPase 1 OS=Mus musculus GN=Iigp1 PE=1 SV=2	2	2
TRUE	Old_Decellularized / Young_Decellularized	Old_Decellularized	Young_Decellularized	10	A0A087WNZ5;A0A087WRP7;P0CW02	51858.1	120180	1.21256	1.21256	131.748	2.31748	0	0.00813075	0.00983414	9	0.414764	A0A087WNZ5;A0A087WRP7;P0CW02	A0A087WNZ5_MOUSE;A0A087WRP7_MOUSE;LY6C1_MOUSE	Lymphocyte antigen 6C1;Lymphocyte antigen 6C1 (Fragment);Lymphocyte antigen 6C1	Ly6c1	A0A087WNZ5;A0A087WRP7;P0CW02	Mus musculus	;;	;;	;;external side of plasma membrane,anchored component of membrane	tr;tr;sp	1;1;2	1	uniprot_mouse_proteome	>tr|A0A087WNZ5|A0A087WNZ5_MOUSE Lymphocyte antigen 6C1 OS=Mus musculus GN=Ly6c1 PE=1 SV=1;>tr|A0A087WRP7|A0A087WRP7_MOUSE Lymphocyte antigen 6C1 (Fragment) OS=Mus musculus GN=Ly6c1 PE=1 SV=1;>sp|P0CW02|LY6C1_MOUSE Lymphocyte antigen 6C1 OS=Mus musculus GN=Ly6c1 PE=2 SV=1	2	2
